# Supplementary material
Source: MDPI journal article supplement (https://www.mdpi.com/1424-2818/12/9/338)
Supplement: s1 [file s1]

Archive with 11 entries (11 files):
- Supplementary material/S1_PRISMA_checklist_Caribbean_recovery.doc
- Supplementary material/S10_CC_forest_plot.pdf
- Supplementary material/S11_AC_Forest.pdf
- Supplementary material/S2_Monitoring_raw_data.xlsx
- Supplementary material/S3_new_Distance_to_shore.xlsx
- Supplementary material/S4_2005_Pob_INEGI_ITER.xlsx
- Supplementary material/S5_2010_Pob_INEGI_ITER.xlsx
- Supplementary material/S6_Temperature_yearly_means.xlsx
- Supplementary material/S7_Chl_yearly_means.xlsx
- Supplementary material/S8_cc_meta-analysis_input.xlsx
- Supplementary material/S9_ac_meta-analysis_input.xlsx
