# Supplementary material
Source: MDPI journal article supplement (https://www.mdpi.com/1424-2818/12/9/338)
Supplement: s1 [file s1 › Supplementary material/S2_Monitoring_raw_data.xlsx]

## Sheet: Hoja1
Name	Longitude	Latitude	Year	C.Cover	Total	Sampling.group	A.Cover
Bonanza	-86.8141	20.9642	2006	3.7	100	PNAPM-CONANP.SF	30
Bonanza	-86.8141	20.9642	2016	20	100	Tesis.Glz.UABCS	13
Bonanza	-86.8141	20.9642	2016	4	100	Tesis.Glz.UABCS	20
Bonanza	-86.8141	20.9642	2016	6	100	Tesis.Glz.UABCS	18
Bonanza	-86.8141	20.9642	2016	3	100	Tesis.Glz.UABCS	9
Bonanza	-86.8141	20.9642	2016	0	100	Monitoreo.PNAPM	31
Bonanza	-86.8141	20.9642	2016	6	100	Monitoreo.PNAPM	30
Bonanza	-86.8141	20.9642	2016	1	100	Monitoreo.PNAPM	59
Bonanza	-86.8141	20.9642	2016	14	100	Monitoreo.PNAPM	19
Bonanza	-86.8141	20.9642	2016	19	100	Monitoreo.PNAPM	21
Bonanza	-86.8141	20.9642	2016	7	100	Monitoreo.PNAPM	33
Bonanza	-86.8141	20.9642	2016	2	100	Monitoreo.PNAPM	36
Bonanza	-86.8141	20.9642	2016	9	100	Monitoreo.PNAPM	25
Bonanza	-86.8141	20.9642	2008	15	100	Monitoreo.PNAPM	27.5
Bonanza	-86.8141	20.9642	2008	21.6667	100	Monitoreo.PNAPM	44
Bonanza	-86.8141	20.9642	2008	13.3333	100	Monitoreo.PNAPM	32
Bonanza	-86.8141	20.9642	2008	9.16667	100	Monitoreo.PNAPM	30
Bonanza	-86.8141	20.9642	2008	18.3333	100	Monitoreo.PNAPM	50
Bonanza	-86.8141	20.9642	2010	4.16667	100	Monitoreo.PNAPM	15
Bonanza	-86.8141	20.9642	2010	4.46429	100	Monitoreo.PNAPM	57
Bonanza	-86.8141	20.9642	2010	4.62963	100	Monitoreo.PNAPM	36
Bonanza	-86.8141	20.9642	2010	4.16667	100	Monitoreo.PNAPM	23
Bonanza	-86.8141	20.9642	2010	5	100	Monitoreo.PNAPM	8
Bonanza	-86.8141	20.9642	2011	5	100	Monitoreo.PNAPM	28
Bonanza	-86.8141	20.9642	2011	3.33333	100	Monitoreo.PNAPM	53
Bonanza	-86.8141	20.9642	2011	2.5	100	Monitoreo.PNAPM	26
Bonanza	-86.8141	20.9642	2011	4.16667	100	Monitoreo.PNAPM	5
Bonanza	-86.8141	20.9642	2011	3.33333	100	Monitoreo.PNAPM	21
Bonanza	-86.8141	20.9642	2012	10.8333	100	PROMOBI.PNAPM	19
Bonanza	-86.8141	20.9642	2012	12.5	100	PROMOBI.PNAPM	18
Bonanza	-86.8141	20.9642	2012	3.33333	100	PROMOBI.PNAPM	15
Bonanza	-86.8141	20.9642	2012	1.66667	100	PROMOBI.PNAPM	19
Bonanza	-86.8141	20.9642	2012	4.16667	100	PROMOBI.PNAPM	31
Bonanza	-86.8141	20.9642	2013	1.66667	100	PROMOBI.PNAPM	18
Bonanza	-86.8141	20.9642	2013	7.5	100	PROMOBI.PNAPM	35
Bonanza	-86.8141	20.9642	2013	2.5	100	PROMOBI.PNAPM	11
Bonanza	-86.8141	20.9642	2013	2.5	100	PROMOBI.PNAPM	68
Bonanza	-86.8141	20.9642	2013	4.16667	100	PROMOBI.PNAPM	33
Bonanza	-86.8141	20.9642	2014	4.16667	100	PROMOBI.PNAPM	3
Bonanza	-86.8141	20.9642	2014	11.6667	100	PROMOBI.PNAPM	55
Bonanza	-86.8141	20.9642	2014	5.83333	100	PROMOBI.PNAPM	2
Bonanza	-86.8141	20.9642	2014	5	100	PROMOBI.PNAPM	53
Bonanza	-86.8141	20.9642	2014	12.5	100	PROMOBI.PNAPM	18
Bonanza	-86.8141	20.9642	2015	3.33333	100	PROMOBI.PNAPM	7
Bonanza	-86.8141	20.9642	2015	3.33333	100	PROMOBI.PNAPM	21
Bonanza	-86.8141	20.9642	2015	4.16667	100	PROMOBI.PNAPM	0
Bonanza	-86.8141	20.9642	2015	3.33333	100	PROMOBI.PNAPM	35
Bonanza	-86.8141	20.9642	2015	5	100	PROMOBI.PNAPM	5
Bonanza	-86.8141	20.9642	2006	2	100	SNIB.CONABIO	40
Bonanza	-86.8141	20.9642	2006	8	100	SNIB.CONABIO	38
Bonanza	-86.8141	20.9642	2006	12	100	SNIB.CONABIO	28
Bonanza	-86.8141	20.9642	2006	14	100	SNIB.CONABIO	44
Bonanza	-86.8141	20.9642	2006	4	100	SNIB.CONABIO	48
Bonanza	-86.8141	20.9642	2006	16	100	SNIB.CONABIO	38
Bonanza	-86.8141	20.9642	2006	4	100	SNIB.CONABIO	52
Bonanza	-86.8141	20.9642	2006	10	100	SNIB.CONABIO	46
Bonanza	-86.8141	20.9642	2006	12	100	SNIB.CONABIO	34
Bonanza	-86.8141	20.9642	2006	38	100	SNIB.CONABIO	44
CardonaMERASomero	-87.0195	20.4078	2009	7.5	100	MERA.PNAC	26
CardonaMERASomero	-87.0195	20.4078	2009	10	100	MERA.PNAC	24
CardonaMERASomero	-87.0195	20.4078	2009	10	100	MERA.PNAC	38
CardonaMERASomero	-87.0195	20.4078	2009	20.8333	100	MERA.PNAC	18
CardonaMERASomero	-87.0195	20.4078	2009	19.1667	100	MERA.PNAC	25
CardonaMERASomero	-87.0195	20.4078	2009	20	100	MERA.PNAC	21
CardonaMERASomero	-87.0195	20.4078	2011	13.3333	100	MERA.PNAC	18
CardonaMERASomero	-87.0195	20.4078	2011	10	100	MERA.PNAC	28
CardonaMERASomero	-87.0195	20.4078	2011	10	100	MERA.PNAC	38
CardonaMERASomero	-87.0195	20.4078	2011	13.3333	100	MERA.PNAC	21
CardonaMERASomero	-87.0195	20.4078	2011	10.8333	100	MERA.PNAC	30
CardonaMERASomero	-87.0195	20.4078	2011	17.5	100	MERA.PNAC	30
CardonaMERASomero	-87.0195	20.4078	2014	11.6667	100	MERA.PNAC	33
CardonaMERASomero	-87.0195	20.4078	2014	6.66667	100	MERA.PNAC	48
CardonaMERASomero	-87.0195	20.4078	2014	19.8347	100	MERA.PNAC	16
CardonaMERASomero	-87.0195	20.4078	2014	24.1667	100	MERA.PNAC	25
CardonaMERASomero	-87.0195	20.4078	2014	18.4874	100	MERA.PNAC	47
CardonaMERASomero	-87.0195	20.4078	2014	15	100	MERA.PNAC	57
Chankanaab	-87.0023	20.44	2005	10.8333	100	Monitoreo.PNAC	13
Chankanaab	-87.0023	20.44	2005	7.5	100	Monitoreo.PNAC	28
Chankanaab	-87.0023	20.44	2005	30.8333	100	Monitoreo.PNAC	23
Chankanaab	-87.0023	20.44	2005	6.66667	100	Monitoreo.PNAC	33
Chankanaab	-87.0023	20.44	2005	30	100	Monitoreo.PNAC	18
Chankanaab	-87.0023	20.44	2005	20	100	Monitoreo.PNAC	28
Chankanaab	-87.0023	20.44	2005	14.1667	100	Monitoreo.PNAC	18
Chankanaab	-87.0023	20.44	2005	9.16667	100	Monitoreo.PNAC	23
Chankanaab	-87.0023	20.44	2005	22.5	100	Monitoreo.PNAC	18
Chankanaab	-87.0023	20.44	2005	20	100	Monitoreo.PNAC	30
Chankanaab	-87.0023	20.44	2005	23.3333	100	Monitoreo.PNAC	15
Chankanaab	-87.0023	20.44	2005	25	100	Monitoreo.PNAC	20
Chankanaab	-87.0023	20.44	2005	5.83333	100	Monitoreo.PNAC	8
Chankanaab	-87.0023	20.44	2005	13.3333	100	Monitoreo.PNAC	11
Chankanaab	-87.0023	20.44	2005	18.3333	100	Monitoreo.PNAC	14
Chankanaab	-87.0023	20.44	2005	7.5	100	Monitoreo.PNAC	6
Chankanaab	-87.0023	20.44	2005	15.8333	100	Monitoreo.PNAC	13
Chankanaab	-87.0023	20.44	2005	8.33333	100	Monitoreo.PNAC	11
Chankanaab	-87.0023	20.44	2006	4.16667	100	Monitoreo.PNAC	1
Chankanaab	-87.0023	20.44	2006	18.3333	100	Monitoreo.PNAC	0
Chankanaab	-87.0023	20.44	2006	10	100	Monitoreo.PNAC	0
Chankanaab	-87.0023	20.44	2006	15	100	Monitoreo.PNAC	7
Chankanaab	-87.0023	20.44	2006	19.1667	100	Monitoreo.PNAC	9
Chankanaab	-87.0023	20.44	2006	25	100	Monitoreo.PNAC	6
Chankanaab	-87.0023	20.44	2006	6.66667	100	Monitoreo.PNAC	1
Chankanaab	-87.0023	20.44	2006	3.33333	100	Monitoreo.PNAC	0
Chankanaab	-87.0023	20.44	2006	23.3333	100	Monitoreo.PNAC	10
Chankanaab	-87.0023	20.44	2006	10.8333	100	Monitoreo.PNAC	1
Chankanaab	-87.0023	20.44	2006	18.3333	100	Monitoreo.PNAC	10
Chankanaab	-87.0023	20.44	2006	17.5	100	Monitoreo.PNAC	5
Chankanaab	-87.0023	20.44	2007	13.3333	100	Monitoreo.PNAC	10
Chankanaab	-87.0023	20.44	2007	14.1667	100	Monitoreo.PNAC	10
Chankanaab	-87.0023	20.44	2007	16.6667	100	Monitoreo.PNAC	13
Chankanaab	-87.0023	20.44	2007	21.6667	100	Monitoreo.PNAC	19
Chankanaab	-87.0023	20.44	2007	6.66667	100	Monitoreo.PNAC	19
Chankanaab	-87.0023	20.44	2007	15.8333	100	Monitoreo.PNAC	9
Chankanaab	-87.0023	20.44	2007	10.8333	100	Monitoreo.PNAC	5
Chankanaab	-87.0023	20.44	2007	15.8333	100	Monitoreo.PNAC	18
Chankanaab	-87.0023	20.44	2007	12.5	100	Monitoreo.PNAC	17
Chankanaab	-87.0023	20.44	2007	24.1667	100	Monitoreo.PNAC	29
Chankanaab	-87.0023	20.44	2007	18.3333	100	Monitoreo.PNAC	22
Chankanaab	-87.0023	20.44	2007	15.8333	100	Monitoreo.PNAC	25
Chankanaab	-87.0023	20.44	2008	6.66667	100	Monitoreo.PNAC	12
Chankanaab	-87.0023	20.44	2008	11.6667	100	Monitoreo.PNAC	16
Chankanaab	-87.0023	20.44	2008	13.3333	100	Monitoreo.PNAC	17
Chankanaab	-87.0023	20.44	2008	12.5	100	Monitoreo.PNAC	10
Chankanaab	-87.0023	20.44	2008	15	100	Monitoreo.PNAC	33
Chankanaab	-87.0023	20.44	2008	13.3333	100	Monitoreo.PNAC	33
Chankanaab	-87.0023	20.44	2008	6.66667	100	Monitoreo.PNAC	9
Chankanaab	-87.0023	20.44	2008	3.33333	100	Monitoreo.PNAC	11
Chankanaab	-87.0023	20.44	2008	10.8333	100	Monitoreo.PNAC	8
Chankanaab	-87.0023	20.44	2008	8.33333	100	Monitoreo.PNAC	7
Chankanaab	-87.0023	20.44	2008	8.33333	100	Monitoreo.PNAC	13
Chankanaab	-87.0023	20.44	2008	10.8333	100	Monitoreo.PNAC	10
Chankanaab	-87.0023	20.44	2009	7.5	100	MERA.PNAC	4
Chankanaab	-87.0023	20.44	2009	5	100	MERA.PNAC	3
Chankanaab	-87.0023	20.44	2009	6.66667	100	MERA.PNAC	8
Chankanaab	-87.0023	20.44	2009	2.5	100	MERA.PNAC	3
Chankanaab	-87.0023	20.44	2009	5.83333	100	MERA.PNAC	4
Chankanaab	-87.0023	20.44	2009	6.66667	100	MERA.PNAC	6
Chankanaab	-87.0023	20.44	2009	3.33333	100	Monitoreo.PNAC	5
Chankanaab	-87.0023	20.44	2009	5.83333	100	Monitoreo.PNAC	14
Chankanaab	-87.0023	20.44	2009	5.83333	100	Monitoreo.PNAC	16
Chankanaab	-87.0023	20.44	2009	5.83333	100	Monitoreo.PNAC	17
Chankanaab	-87.0023	20.44	2009	5.83333	100	Monitoreo.PNAC	17
Chankanaab	-87.0023	20.44	2009	9.16667	100	Monitoreo.PNAC	15
Chankanaab	-87.0023	20.44	2010	2.5	100	Monitoreo.PNAC	13
Chankanaab	-87.0023	20.44	2010	10	100	Monitoreo.PNAC	17
Chankanaab	-87.0023	20.44	2010	5	100	Monitoreo.PNAC	16
Chankanaab	-87.0023	20.44	2010	10.8333	100	Monitoreo.PNAC	17
Chankanaab	-87.0023	20.44	2010	10.8333	100	Monitoreo.PNAC	20
Chankanaab	-87.0023	20.44	2010	20.8333	100	Monitoreo.PNAC	20
Chankanaab	-87.0023	20.44	2010	14.1667	100	Monitoreo.PNAC	22.5
Chankanaab	-87.0023	20.44	2010	10	100	Monitoreo.PNAC	26
Chankanaab	-87.0023	20.44	2010	17.5	100	Monitoreo.PNAC	29
Chankanaab	-87.0023	20.44	2010	25.8333	100	Monitoreo.PNAC	31
Chankanaab	-87.0023	20.44	2010	27.5	100	Monitoreo.PNAC	37
Chankanaab	-87.0023	20.44	2010	14.1667	100	Monitoreo.PNAC	41
Chankanaab	-87.0023	20.44	2011	9.16667	100	MERA.PNAC	18
Chankanaab	-87.0023	20.44	2011	7.5	100	MERA.PNAC	19
Chankanaab	-87.0023	20.44	2011	12.5	100	MERA.PNAC	29
Chankanaab	-87.0023	20.44	2011	10	100	MERA.PNAC	27
Chankanaab	-87.0023	20.44	2011	8.33333	100	MERA.PNAC	24
Chankanaab	-87.0023	20.44	2011	14.1667	100	MERA.PNAC	34
Chankanaab	-87.0023	20.44	2011	15	100	PROMOBI.PNAC	31
Chankanaab	-87.0023	20.44	2011	5.83333	100	PROMOBI.PNAC	38
Chankanaab	-87.0023	20.44	2011	11.6667	100	PROMOBI.PNAC	33
Chankanaab	-87.0023	20.44	2011	16.6667	100	PROMOBI.PNAC	27
Chankanaab	-87.0023	20.44	2011	19.1667	100	PROMOBI.PNAC	33
Chankanaab	-87.0023	20.44	2011	13.3333	100	PROMOBI.PNAC	28
Chankanaab	-87.0023	20.44	2012	28.3333	100	PROMOBI.PNAC	5
Chankanaab	-87.0023	20.44	2012	31.6667	100	PROMOBI.PNAC	5
Chankanaab	-87.0023	20.44	2012	41.6667	100	PROMOBI.PNAC	14
Chankanaab	-87.0023	20.44	2012	21.6667	100	PROMOBI.PNAC	9
Chankanaab	-87.0023	20.44	2012	34.1667	100	PROMOBI.PNAC	23
Chankanaab	-87.0023	20.44	2012	41.6667	100	PROMOBI.PNAC	16
Chankanaab	-87.0023	20.44	2012	30.8333	100	PROMOBI.PNAC	12
Chankanaab	-87.0023	20.44	2012	24.1667	100	PROMOBI.PNAC	9
Chankanaab	-87.0023	20.44	2012	35	100	PROMOBI.PNAC	11
Chankanaab	-87.0023	20.44	2012	11.6667	100	PROMOBI.PNAC	12
Chankanaab	-87.0023	20.44	2012	25	100	PROMOBI.PNAC	36
Chankanaab	-87.0023	20.44	2012	30.8333	100	PROMOBI.PNAC	20
Chankanaab	-87.0023	20.44	2013	19.1667	100	PROMOBI.PNAC	16
Chankanaab	-87.0023	20.44	2013	15	100	PROMOBI.PNAC	14
Chankanaab	-87.0023	20.44	2013	43.3333	100	PROMOBI.PNAC	16
Chankanaab	-87.0023	20.44	2013	25.8333	100	PROMOBI.PNAC	23
Chankanaab	-87.0023	20.44	2013	9.16667	100	PROMOBI.PNAC	31
Chankanaab	-87.0023	20.44	2013	26.6667	100	PROMOBI.PNAC	31
Chankanaab	-87.0023	20.44	2013	25.8333	100	PROMOBI.PNAC	12
Chankanaab	-87.0023	20.44	2013	27.5	100	PROMOBI.PNAC	13
Chankanaab	-87.0023	20.44	2013	30	100	PROMOBI.PNAC	20
Chankanaab	-87.0023	20.44	2013	24.1667	100	PROMOBI.PNAC	19
Chankanaab	-87.0023	20.44	2013	30	100	PROMOBI.PNAC	21
Chankanaab	-87.0023	20.44	2013	30.8333	100	PROMOBI.PNAC	16
Chankanaab	-87.0023	20.44	2014	0.833333	100	MERA.PNAC	48
Chankanaab	-87.0023	20.44	2014	14.1667	100	MERA.PNAC	49
Chankanaab	-87.0023	20.44	2014	15	100	MERA.PNAC	13
Chankanaab	-87.0023	20.44	2014	10.8333	100	MERA.PNAC	10
Chankanaab	-87.0023	20.44	2014	8.33333	100	MERA.PNAC	38
Chankanaab	-87.0023	20.44	2014	10.8333	100	MERA.PNAC	48
Chankanaab	-87.0023	20.44	2014	14.1667	100	PROMOBI.PNAC	25
Chankanaab	-87.0023	20.44	2014	30.8333	100	PROMOBI.PNAC	18
Chankanaab	-87.0023	20.44	2014	19.1667	100	PROMOBI.PNAC	26
Chankanaab	-87.0023	20.44	2014	44.1667	100	PROMOBI.PNAC	17
Chankanaab	-87.0023	20.44	2014	15	100	PROMOBI.PNAC	2
Chankanaab	-87.0023	20.44	2014	15.8333	100	PROMOBI.PNAC	27
Chankanaab	-87.0023	20.44	2014	24.1667	100	PROMOBI.PNAC	5
Chankanaab	-87.0023	20.44	2014	36.6667	100	PROMOBI.PNAC	12
Chankanaab	-87.0023	20.44	2014	33.3333	100	PROMOBI.PNAC	8
Chankanaab	-87.0023	20.44	2014	35.8333	100	PROMOBI.PNAC	8
Chankanaab	-87.0023	20.44	2014	32.5	100	PROMOBI.PNAC	6
Chankanaab	-87.0023	20.44	2014	33.3333	100	PROMOBI.PNAC	9
Chankanaab	-87.0023	20.44	2015	22.5	100	PROMOBI.PNAC	10
Chankanaab	-87.0023	20.44	2015	30.8333	100	PROMOBI.PNAC	8
Chankanaab	-87.0023	20.44	2015	28.3333	100	PROMOBI.PNAC	9
Chankanaab	-87.0023	20.44	2015	17.5	100	PROMOBI.PNAC	1
Chankanaab	-87.0023	20.44	2015	15	100	PROMOBI.PNAC	9
Chankanaab	-87.0023	20.44	2015	14.1667	100	PROMOBI.PNAC	8
Chankanaab	-87.0023	20.44	2016	24	100	CONACYT.247104	32
Chankanaab	-87.0023	20.44	2016	24	100	CONACYT.247104	36
Chankanaab	-87.0023	20.44	2016	24	100	CONACYT.247104	15
Chankanaab	-87.0023	20.44	2016	16	100	CONACYT.247104	32
Chankanaab	-87.0023	20.44	2016	16	100	CONACYT.247104	23
Chankanaab	-87.0023	20.44	2016	3	100	CONACYT.247104	41
Chankanaab	-87.0023	20.44	2016	16	100	Greenpeace	30
Chankanaab	-87.0023	20.44	2016	16	100	Greenpeace	35
Chankanaab	-87.0023	20.44	2016	11	100	Greenpeace	33
Chankanaab	-87.0023	20.44	2016	24	100	Greenpeace	54
Chankanaab	-87.0023	20.44	2016	20	100	Greenpeace	38
Chankanaab	-87.0023	20.44	2016	8	100	Greenpeace	36
ChankanaabBolonesMERAProfundo	-87.0051	20.4401	2009	9.16667	100	MERA.PNAC	21
ChankanaabBolonesMERAProfundo	-87.0051	20.4401	2009	7.5	100	MERA.PNAC	5
ChankanaabBolonesMERAProfundo	-87.0051	20.4401	2009	7.5	100	MERA.PNAC	9
ChankanaabBolonesMERAProfundo	-87.0051	20.4401	2009	6.66667	100	MERA.PNAC	3
ChankanaabBolonesMERAProfundo	-87.0051	20.4401	2009	3.33333	100	MERA.PNAC	31
ChankanaabBolonesMERAProfundo	-87.0051	20.4401	2009	3.33333	100	MERA.PNAC	11
ChankanaabBolonesMERAProfundo	-87.0051	20.4401	2011	4.16667	100	MERA.PNAC	19
ChankanaabBolonesMERAProfundo	-87.0051	20.4401	2011	8.33333	100	MERA.PNAC	40
ChankanaabBolonesMERAProfundo	-87.0051	20.4401	2011	10.8333	100	MERA.PNAC	30
ChankanaabBolonesMERAProfundo	-87.0051	20.4401	2011	12.5	100	MERA.PNAC	20
ChankanaabBolonesMERAProfundo	-87.0051	20.4401	2011	2.5	100	MERA.PNAC	16
ChankanaabBolonesMERAProfundo	-87.0051	20.4401	2011	15.8333	100	MERA.PNAC	30
ChankanaabBolonesMERAProfundo	-87.0051	20.4401	2014	4.16667	100	MERA.PNAC	60
ChankanaabBolonesMERAProfundo	-87.0051	20.4401	2014	0.833333	100	MERA.PNAC	80
ChankanaabBolonesMERAProfundo	-87.0051	20.4401	2014	11.6667	100	MERA.PNAC	65
ChankanaabBolonesMERAProfundo	-87.0051	20.4401	2014	5.83333	100	MERA.PNAC	34
ChankanaabBolonesMERAProfundo	-87.0051	20.4401	2014	12.5	100	MERA.PNAC	22
Colombia	-87.0272	20.3243	2005	30.8333	100	Monitoreo.PNAC	14
Colombia	-87.0272	20.3243	2005	24.1667	100	Monitoreo.PNAC	17
Colombia	-87.0272	20.3243	2005	32.5	100	Monitoreo.PNAC	18
Colombia	-87.0272	20.3243	2005	16.6667	100	Monitoreo.PNAC	20
Colombia	-87.0272	20.3243	2005	27.5	100	Monitoreo.PNAC	11
Colombia	-87.0272	20.3243	2005	25	100	Monitoreo.PNAC	17
Colombia	-87.0272	20.3243	2005	25.8333	100	Monitoreo.PNAC	19
Colombia	-87.0272	20.3243	2005	19.1667	100	Monitoreo.PNAC	15
Colombia	-87.0272	20.3243	2005	16.6667	100	Monitoreo.PNAC	21
Colombia	-87.0272	20.3243	2005	15	100	Monitoreo.PNAC	11
Colombia	-87.0272	20.3243	2005	23.3333	100	Monitoreo.PNAC	19
Colombia	-87.0272	20.3243	2005	21.6667	100	Monitoreo.PNAC	18
Colombia	-87.0272	20.3243	2005	11.6667	100	Monitoreo.PNAC	12
Colombia	-87.0272	20.3243	2005	8.33333	100	Monitoreo.PNAC	13
Colombia	-87.0272	20.3243	2005	10.8333	100	Monitoreo.PNAC	13
Colombia	-87.0272	20.3243	2005	11.6667	100	Monitoreo.PNAC	21
Colombia	-87.0272	20.3243	2005	10.8333	100	Monitoreo.PNAC	19
Colombia	-87.0272	20.3243	2005	13.3333	100	Monitoreo.PNAC	16
Colombia	-87.0272	20.3243	2006	20.8333	100	Monitoreo.PNAC	8
Colombia	-87.0272	20.3243	2006	17.5	100	Monitoreo.PNAC	8
Colombia	-87.0272	20.3243	2006	23.3333	100	Monitoreo.PNAC	18
Colombia	-87.0272	20.3243	2006	11.6667	100	Monitoreo.PNAC	8
Colombia	-87.0272	20.3243	2006	18.3333	100	Monitoreo.PNAC	11
Colombia	-87.0272	20.3243	2006	22.5	100	Monitoreo.PNAC	10
Colombia	-87.0272	20.3243	2006	16.6667	100	Monitoreo.PNAC	4
Colombia	-87.0272	20.3243	2006	15.8333	100	Monitoreo.PNAC	7
Colombia	-87.0272	20.3243	2006	36.6667	100	Monitoreo.PNAC	7
Colombia	-87.0272	20.3243	2006	14.1667	100	Monitoreo.PNAC	8
Colombia	-87.0272	20.3243	2006	39.1667	100	Monitoreo.PNAC	8
Colombia	-87.0272	20.3243	2006	14.1667	100	Monitoreo.PNAC	8
Colombia	-87.0272	20.3243	2007	29.1667	100	Monitoreo.PNAC	8
Colombia	-87.0272	20.3243	2007	18.3333	100	Monitoreo.PNAC	3
Colombia	-87.0272	20.3243	2007	34.1667	100	Monitoreo.PNAC	8
Colombia	-87.0272	20.3243	2007	12.5	100	Monitoreo.PNAC	3
Colombia	-87.0272	20.3243	2007	21.6667	100	Monitoreo.PNAC	9
Colombia	-87.0272	20.3243	2007	25.8333	100	Monitoreo.PNAC	1
Colombia	-87.0272	20.3243	2007	28.3333	100	Monitoreo.PNAC	24
Colombia	-87.0272	20.3243	2007	11.6667	100	Monitoreo.PNAC	16
Colombia	-87.0272	20.3243	2007	10.8333	100	Monitoreo.PNAC	13
Colombia	-87.0272	20.3243	2007	17.5	100	Monitoreo.PNAC	18
Colombia	-87.0272	20.3243	2007	27.5	100	Monitoreo.PNAC	28
Colombia	-87.0272	20.3243	2007	26.6667	100	Monitoreo.PNAC	33
Colombia	-87.0272	20.3243	2008	15	100	Monitoreo.PNAC	18
Colombia	-87.0272	20.3243	2008	20.8333	100	Monitoreo.PNAC	12
Colombia	-87.0272	20.3243	2008	10	100	Monitoreo.PNAC	12
Colombia	-87.0272	20.3243	2008	21.6667	100	Monitoreo.PNAC	15
Colombia	-87.0272	20.3243	2008	15	100	Monitoreo.PNAC	10
Colombia	-87.0272	20.3243	2008	21.6667	100	Monitoreo.PNAC	8
Colombia	-87.0272	20.3243	2008	19.1667	100	Monitoreo.PNAC	14
Colombia	-87.0272	20.3243	2008	22.5	100	Monitoreo.PNAC	5
Colombia	-87.0272	20.3243	2008	16.6667	100	Monitoreo.PNAC	9
Colombia	-87.0272	20.3243	2008	17.5	100	Monitoreo.PNAC	14
Colombia	-87.0272	20.3243	2008	8.33333	100	Monitoreo.PNAC	13
Colombia	-87.0272	20.3243	2008	13.3333	100	Monitoreo.PNAC	11
Colombia	-87.0272	20.3243	2009	19.1667	100	MERA.PNAC	8
Colombia	-87.0272	20.3243	2009	16.6667	100	MERA.PNAC	9
Colombia	-87.0272	20.3243	2009	10	100	MERA.PNAC	5
Colombia	-87.0272	20.3243	2009	20.8333	100	MERA.PNAC	8
Colombia	-87.0272	20.3243	2009	10	100	MERA.PNAC	8
Colombia	-87.0272	20.3243	2009	11.6667	100	MERA.PNAC	13
Colombia	-87.0272	20.3243	2009	23.3333	100	Monitoreo.PNAC	14
Colombia	-87.0272	20.3243	2009	19.1667	100	Monitoreo.PNAC	33
Colombia	-87.0272	20.3243	2009	17.5	100	Monitoreo.PNAC	23
Colombia	-87.0272	20.3243	2009	20	100	Monitoreo.PNAC	9
Colombia	-87.0272	20.3243	2009	13.3333	100	Monitoreo.PNAC	15
Colombia	-87.0272	20.3243	2009	15.8333	100	Monitoreo.PNAC	19
Colombia	-87.0272	20.3243	2010	10.8333	100	Monitoreo.PNAC	17
Colombia	-87.0272	20.3243	2010	12.5	100	Monitoreo.PNAC	6
Colombia	-87.0272	20.3243	2010	7.5	100	Monitoreo.PNAC	14
Colombia	-87.0272	20.3243	2010	17.5	100	Monitoreo.PNAC	7
Colombia	-87.0272	20.3243	2010	11.6667	100	Monitoreo.PNAC	8
Colombia	-87.0272	20.3243	2010	19.1667	100	Monitoreo.PNAC	7
Colombia	-87.0272	20.3243	2010	17.5	100	Monitoreo.PNAC	2
Colombia	-87.0272	20.3243	2010	18.3333	100	Monitoreo.PNAC	5
Colombia	-87.0272	20.3243	2010	27.5	100	Monitoreo.PNAC	10
Colombia	-87.0272	20.3243	2010	15	100	Monitoreo.PNAC	12
Colombia	-87.0272	20.3243	2010	26.6667	100	Monitoreo.PNAC	18
Colombia	-87.0272	20.3243	2010	24.1667	100	Monitoreo.PNAC	28
Colombia	-87.0272	20.3243	2011	8.33333	100	MERA.PNAC	11
Colombia	-87.0272	20.3243	2011	11.6667	100	MERA.PNAC	14
Colombia	-87.0272	20.3243	2011	13.3333	100	MERA.PNAC	7
Colombia	-87.0272	20.3243	2011	14.1667	100	MERA.PNAC	3
Colombia	-87.0272	20.3243	2011	22.5	100	MERA.PNAC	9
Colombia	-87.0272	20.3243	2011	25	100	MERA.PNAC	6
Colombia	-87.0272	20.3243	2012	32.5	100	PROMOBI.PNAC	15
Colombia	-87.0272	20.3243	2012	49.1667	100	PROMOBI.PNAC	17
Colombia	-87.0272	20.3243	2012	56.6667	100	PROMOBI.PNAC	10
Colombia	-87.0272	20.3243	2012	46.6667	100	PROMOBI.PNAC	20
Colombia	-87.0272	20.3243	2012	41.6667	100	PROMOBI.PNAC	25
Colombia	-87.0272	20.3243	2012	47.5	100	PROMOBI.PNAC	28
Colombia	-87.0272	20.3243	2012	25	100	PROMOBI.PNAC	15
Colombia	-87.0272	20.3243	2012	43.3333	100	PROMOBI.PNAC	10
Colombia	-87.0272	20.3243	2012	50	100	PROMOBI.PNAC	1
Colombia	-87.0272	20.3243	2012	54.1667	100	PROMOBI.PNAC	9
Colombia	-87.0272	20.3243	2012	44.1667	100	PROMOBI.PNAC	6
Colombia	-87.0272	20.3243	2012	54.1667	100	PROMOBI.PNAC	15
Colombia	-87.0272	20.3243	2013	11.6667	100	PROMOBI.PNAC	4
Colombia	-87.0272	20.3243	2013	37.5	100	PROMOBI.PNAC	5
Colombia	-87.0272	20.3243	2013	17.5	100	PROMOBI.PNAC	5
Colombia	-87.0272	20.3243	2013	42.5	100	PROMOBI.PNAC	11
Colombia	-87.0272	20.3243	2013	15.8333	100	PROMOBI.PNAC	6
Colombia	-87.0272	20.3243	2013	35	100	PROMOBI.PNAC	15
Colombia	-87.0272	20.3243	2013	20	100	PROMOBI.PNAC	6
Colombia	-87.0272	20.3243	2013	42.5	100	PROMOBI.PNAC	6
Colombia	-87.0272	20.3243	2013	33.3333	100	PROMOBI.PNAC	11
Colombia	-87.0272	20.3243	2013	43.3333	100	PROMOBI.PNAC	10
Colombia	-87.0272	20.3243	2013	38.3333	100	PROMOBI.PNAC	7
Colombia	-87.0272	20.3243	2013	40	100	PROMOBI.PNAC	17
Colombia	-87.0272	20.3243	2014	35.8333	100	PROMOBI.PNAC	4
Colombia	-87.0272	20.3243	2014	51.6667	100	PROMOBI.PNAC	13
Colombia	-87.0272	20.3243	2014	35	100	PROMOBI.PNAC	6
Colombia	-87.0272	20.3243	2014	37.5	100	PROMOBI.PNAC	13
Colombia	-87.0272	20.3243	2014	47.5	100	PROMOBI.PNAC	5
Colombia	-87.0272	20.3243	2014	42.5	100	PROMOBI.PNAC	3
Colombia	-87.0272	20.3243	2014	17.5	100	PROMOBI.PNAC	6
Colombia	-87.0272	20.3243	2014	33.3333	100	PROMOBI.PNAC	10
Colombia	-87.0272	20.3243	2014	35	100	PROMOBI.PNAC	8
Colombia	-87.0272	20.3243	2014	37.5	100	PROMOBI.PNAC	10
Colombia	-87.0272	20.3243	2014	20	100	PROMOBI.PNAC	3
Colombia	-87.0272	20.3243	2014	38.3333	100	PROMOBI.PNAC	16
Colombia	-87.0272	20.3243	2015	25.8333	100	PROMOBI.PNAC	5
Colombia	-87.0272	20.3243	2015	24.1667	100	PROMOBI.PNAC	5
Colombia	-87.0272	20.3243	2015	14.1667	100	PROMOBI.PNAC	4
Colombia	-87.0272	20.3243	2015	25.8333	100	PROMOBI.PNAC	8
Colombia	-87.0272	20.3243	2015	45.8333	100	PROMOBI.PNAC	3
Colombia	-87.0272	20.3243	2015	54.1667	100	PROMOBI.PNAC	10
Colombia	-87.0272	20.3243	2016	24	100	CONACYT.247104	19
Colombia	-87.0272	20.3243	2016	17	100	CONACYT.247104	11
Colombia	-87.0272	20.3243	2016	53	100	CONACYT.247104	6
Colombia	-87.0272	20.3243	2016	54	100	CONACYT.247104	10
Colombia	-87.0272	20.3243	2016	17	100	CONACYT.247104	17
Colombia	-87.0272	20.3243	2016	27	100	CONACYT.247104	24
ColombiaMERASomero	-87.0244	20.3205	2009	13.3333	100	MERA.PNAC	23
ColombiaMERASomero	-87.0244	20.3205	2009	20.8333	100	MERA.PNAC	18
ColombiaMERASomero	-87.0244	20.3205	2009	26.6667	100	MERA.PNAC	33
ColombiaMERASomero	-87.0244	20.3205	2009	20.8333	100	MERA.PNAC	23
ColombiaMERASomero	-87.0244	20.3205	2009	19.1667	100	MERA.PNAC	38
ColombiaMERASomero	-87.0244	20.3205	2009	23.3333	100	MERA.PNAC	29
ColombiaMERASomero	-87.0244	20.3205	2011	25.8333	100	MERA.PNAC	43
ColombiaMERASomero	-87.0244	20.3205	2011	37.5	100	MERA.PNAC	42
ColombiaMERASomero	-87.0244	20.3205	2011	27.5	100	MERA.PNAC	38
ColombiaMERASomero	-87.0244	20.3205	2011	25	100	MERA.PNAC	38
ColombiaMERASomero	-87.0244	20.3205	2011	20	100	MERA.PNAC	35
ColombiaMERASomero	-87.0244	20.3205	2011	18.3333	100	MERA.PNAC	28
ColombiaMERASomero	-87.0244	20.3205	2014	30	100	MERA.PNAC	43
ColombiaMERASomero	-87.0244	20.3205	2014	16.6667	100	MERA.PNAC	32
ColombiaMERASomero	-87.0244	20.3205	2014	23.1405	100	MERA.PNAC	19
ColombiaMERASomero	-87.0244	20.3205	2014	48.3333	100	MERA.PNAC	9
ColombiaMERASomero	-87.0244	20.3205	2014	25.2101	100	MERA.PNAC	48
ColombiaMERASomero	-87.0244	20.3205	2014	36.6667	100	MERA.PNAC	38
Cuevones	-86.742	21.1617	2014	3.2943	100	Perera-Valderrama.etal.2016	2
Cuevones	-86.742	21.1617	2016	13	100	CONACYT.247104	63
Cuevones	-86.742	21.1617	2016	22	100	CONACYT.247104	53
Cuevones	-86.742	21.1617	2016	11	100	CONACYT.247104	53
Cuevones	-86.742	21.1617	2016	20	100	CONACYT.247104	27
Cuevones	-86.742	21.1617	2016	5	100	CONACYT.247104	29
Cuevones	-86.742	21.1617	2016	8	100	CONACYT.247104	47
Cuevones	-86.742	21.1617	2011	6.66667	100	Monitoreo.PNAPM	50
Cuevones	-86.742	21.1617	2011	1.66667	100	Monitoreo.PNAPM	47
Cuevones	-86.742	21.1617	2011	2.5	100	Monitoreo.PNAPM	39
Cuevones	-86.742	21.1617	2011	0.833333	100	Monitoreo.PNAPM	21
Dalila	-87.0291	20.3488	2005	40	100	Monitoreo.PNAC	33
Dalila	-87.0291	20.3488	2005	19.1667	100	Monitoreo.PNAC	18
Dalila	-87.0291	20.3488	2005	15.8333	100	Monitoreo.PNAC	5
Dalila	-87.0291	20.3488	2005	26.6667	100	Monitoreo.PNAC	14
Dalila	-87.0291	20.3488	2005	20.8333	100	Monitoreo.PNAC	11
Dalila	-87.0291	20.3488	2005	31.6667	100	Monitoreo.PNAC	28
Dalila	-87.0291	20.3488	2005	18.3333	100	Monitoreo.PNAC	15
Dalila	-87.0291	20.3488	2005	13.3333	100	Monitoreo.PNAC	13
Dalila	-87.0291	20.3488	2005	9.16667	100	Monitoreo.PNAC	12
Dalila	-87.0291	20.3488	2005	15	100	Monitoreo.PNAC	16
Dalila	-87.0291	20.3488	2005	20.8333	100	Monitoreo.PNAC	17
Dalila	-87.0291	20.3488	2005	18.3333	100	Monitoreo.PNAC	13
Dalila	-87.0291	20.3488	2005	20.8333	100	Monitoreo.PNAC	17
Dalila	-87.0291	20.3488	2005	8.33333	100	Monitoreo.PNAC	10
Dalila	-87.0291	20.3488	2005	11.6667	100	Monitoreo.PNAC	10
Dalila	-87.0291	20.3488	2005	8.33333	100	Monitoreo.PNAC	6
Dalila	-87.0291	20.3488	2005	15.8333	100	Monitoreo.PNAC	10
Dalila	-87.0291	20.3488	2005	10	100	Monitoreo.PNAC	5
Dalila	-87.0291	20.3488	2006	5.83333	100	Monitoreo.PNAC	10
Dalila	-87.0291	20.3488	2006	10	100	Monitoreo.PNAC	1
Dalila	-87.0291	20.3488	2006	15.8333	100	Monitoreo.PNAC	7
Dalila	-87.0291	20.3488	2006	12.5	100	Monitoreo.PNAC	1
Dalila	-87.0291	20.3488	2006	20	100	Monitoreo.PNAC	9
Dalila	-87.0291	20.3488	2006	11.6667	100	Monitoreo.PNAC	3
Dalila	-87.0291	20.3488	2006	12.5	100	Monitoreo.PNAC	14
Dalila	-87.0291	20.3488	2006	22.5	100	Monitoreo.PNAC	3
Dalila	-87.0291	20.3488	2006	19.1667	100	Monitoreo.PNAC	8
Dalila	-87.0291	20.3488	2006	20	100	Monitoreo.PNAC	10
Dalila	-87.0291	20.3488	2006	13.3333	100	Monitoreo.PNAC	20
Dalila	-87.0291	20.3488	2006	19.1667	100	Monitoreo.PNAC	10
Dalila	-87.0291	20.3488	2007	32.5	100	Monitoreo.PNAC	7
Dalila	-87.0291	20.3488	2007	15	100	Monitoreo.PNAC	8
Dalila	-87.0291	20.3488	2007	25	100	Monitoreo.PNAC	11
Dalila	-87.0291	20.3488	2007	16.6667	100	Monitoreo.PNAC	8
Dalila	-87.0291	20.3488	2007	15.8333	100	Monitoreo.PNAC	15
Dalila	-87.0291	20.3488	2007	9.16667	100	Monitoreo.PNAC	11
Dalila	-87.0291	20.3488	2007	13.3333	100	Monitoreo.PNAC	23
Dalila	-87.0291	20.3488	2007	21.6667	100	Monitoreo.PNAC	30
Dalila	-87.0291	20.3488	2007	9.16667	100	Monitoreo.PNAC	8
Dalila	-87.0291	20.3488	2007	15	100	Monitoreo.PNAC	24
Dalila	-87.0291	20.3488	2007	25	100	Monitoreo.PNAC	16
Dalila	-87.0291	20.3488	2007	15.8333	100	Monitoreo.PNAC	38
Dalila	-87.0291	20.3488	2008	9.16667	100	Monitoreo.PNAC	7
Dalila	-87.0291	20.3488	2008	7.5	100	Monitoreo.PNAC	9
Dalila	-87.0291	20.3488	2008	16.6667	100	Monitoreo.PNAC	14
Dalila	-87.0291	20.3488	2008	11.6667	100	Monitoreo.PNAC	14
Dalila	-87.0291	20.3488	2008	10.8333	100	Monitoreo.PNAC	3
Dalila	-87.0291	20.3488	2008	6.66667	100	Monitoreo.PNAC	9
Dalila	-87.0291	20.3488	2008	10	100	Monitoreo.PNAC	19
Dalila	-87.0291	20.3488	2008	9.16667	100	Monitoreo.PNAC	23
Dalila	-87.0291	20.3488	2008	6.66667	100	Monitoreo.PNAC	3
Dalila	-87.0291	20.3488	2008	13.3333	100	Monitoreo.PNAC	15
Dalila	-87.0291	20.3488	2008	11.6667	100	Monitoreo.PNAC	17
Dalila	-87.0291	20.3488	2008	13.3333	100	Monitoreo.PNAC	20
Dalila	-87.0291	20.3488	2009	8.33333	100	MERA.PNAC	17
Dalila	-87.0291	20.3488	2009	12.5	100	MERA.PNAC	20
Dalila	-87.0291	20.3488	2009	5	100	MERA.PNAC	3
Dalila	-87.0291	20.3488	2009	5	100	MERA.PNAC	8
Dalila	-87.0291	20.3488	2009	5	100	MERA.PNAC	8
Dalila	-87.0291	20.3488	2009	10.8333	100	MERA.PNAC	10
Dalila	-87.0291	20.3488	2009	14.1667	100	Monitoreo.PNAC	15
Dalila	-87.0291	20.3488	2009	10	100	Monitoreo.PNAC	23
Dalila	-87.0291	20.3488	2009	7.5	100	Monitoreo.PNAC	7
Dalila	-87.0291	20.3488	2009	15.8333	100	Monitoreo.PNAC	13
Dalila	-87.0291	20.3488	2009	10	100	Monitoreo.PNAC	23
Dalila	-87.0291	20.3488	2009	13.3333	100	Monitoreo.PNAC	12
Dalila	-87.0291	20.3488	2009	8.33333	100	Monitoreo.PNAC	17
Dalila	-87.0291	20.3488	2009	12.5	100	Monitoreo.PNAC	20
Dalila	-87.0291	20.3488	2009	5	100	Monitoreo.PNAC	3
Dalila	-87.0291	20.3488	2009	5	100	Monitoreo.PNAC	8
Dalila	-87.0291	20.3488	2009	5	100	Monitoreo.PNAC	8
Dalila	-87.0291	20.3488	2009	10.8333	100	Monitoreo.PNAC	10
Dalila	-87.0291	20.3488	2010	10.8333	100	Monitoreo.PNAC	17
Dalila	-87.0291	20.3488	2010	18.3333	100	Monitoreo.PNAC	12
Dalila	-87.0291	20.3488	2010	9.16667	100	Monitoreo.PNAC	5
Dalila	-87.0291	20.3488	2010	8.33333	100	Monitoreo.PNAC	11
Dalila	-87.0291	20.3488	2010	10	100	Monitoreo.PNAC	22
Dalila	-87.0291	20.3488	2010	11.6667	100	Monitoreo.PNAC	25
Dalila	-87.0291	20.3488	2010	24.1667	100	Monitoreo.PNAC	26
Dalila	-87.0291	20.3488	2010	15.8333	100	Monitoreo.PNAC	32
Dalila	-87.0291	20.3488	2010	9.16667	100	Monitoreo.PNAC	17
Dalila	-87.0291	20.3488	2010	15	100	Monitoreo.PNAC	18
Dalila	-87.0291	20.3488	2010	14.1667	100	Monitoreo.PNAC	18
Dalila	-87.0291	20.3488	2010	18.3333	100	Monitoreo.PNAC	23
Dalila	-87.0291	20.3488	2011	15.8333	100	MERA.PNAC	22.5
Dalila	-87.0291	20.3488	2011	7.5	100	MERA.PNAC	26
Dalila	-87.0291	20.3488	2011	15	100	MERA.PNAC	29
Dalila	-87.0291	20.3488	2011	12.5	100	MERA.PNAC	35
Dalila	-87.0291	20.3488	2011	18.3333	100	MERA.PNAC	28
Dalila	-87.0291	20.3488	2011	21.6667	100	MERA.PNAC	29
Dalila	-87.0291	20.3488	2012	26.6667	100	PROMOBI.PNAC	11
Dalila	-87.0291	20.3488	2012	50.8333	100	PROMOBI.PNAC	12
Dalila	-87.0291	20.3488	2012	28.3333	100	PROMOBI.PNAC	19
Dalila	-87.0291	20.3488	2012	34.1667	100	PROMOBI.PNAC	23
Dalila	-87.0291	20.3488	2012	37.5	100	PROMOBI.PNAC	8
Dalila	-87.0291	20.3488	2012	51.6667	100	PROMOBI.PNAC	17
Dalila	-87.0291	20.3488	2012	32.5	100	PROMOBI.PNAC	8
Dalila	-87.0291	20.3488	2012	40.8333	100	PROMOBI.PNAC	11
Dalila	-87.0291	20.3488	2012	25.8333	100	PROMOBI.PNAC	16
Dalila	-87.0291	20.3488	2012	44.1667	100	PROMOBI.PNAC	13
Dalila	-87.0291	20.3488	2012	26.6667	100	PROMOBI.PNAC	16
Dalila	-87.0291	20.3488	2012	38.3333	100	PROMOBI.PNAC	16
Dalila	-87.0291	20.3488	2013	33.3333	100	PROMOBI.PNAC	11
Dalila	-87.0291	20.3488	2013	45	100	PROMOBI.PNAC	18
Dalila	-87.0291	20.3488	2013	25.8333	100	PROMOBI.PNAC	24
Dalila	-87.0291	20.3488	2013	28.3333	100	PROMOBI.PNAC	28
Dalila	-87.0291	20.3488	2013	40.8333	100	PROMOBI.PNAC	30
Dalila	-87.0291	20.3488	2013	55	100	PROMOBI.PNAC	17
Dalila	-87.0291	20.3488	2013	35	100	PROMOBI.PNAC	5
Dalila	-87.0291	20.3488	2013	40.8333	100	PROMOBI.PNAC	14
Dalila	-87.0291	20.3488	2013	35.8333	100	PROMOBI.PNAC	3
Dalila	-87.0291	20.3488	2013	40	100	PROMOBI.PNAC	11
Dalila	-87.0291	20.3488	2013	33.3333	100	PROMOBI.PNAC	16
Dalila	-87.0291	20.3488	2013	55.8333	100	PROMOBI.PNAC	12
Dalila	-87.0291	20.3488	2014	16.6667	100	MERA.PNAC	55
Dalila	-87.0291	20.3488	2014	31.6667	100	MERA.PNAC	29
Dalila	-87.0291	20.3488	2014	20.6612	100	MERA.PNAC	31
Dalila	-87.0291	20.3488	2014	24.1667	100	MERA.PNAC	50
Dalila	-87.0291	20.3488	2014	30.2521	100	MERA.PNAC	51
Dalila	-87.0291	20.3488	2014	35	100	PROMOBI.PNAC	7
Dalila	-87.0291	20.3488	2014	29.1667	100	PROMOBI.PNAC	13
Dalila	-87.0291	20.3488	2014	35.8333	100	PROMOBI.PNAC	17
Dalila	-87.0291	20.3488	2014	41.6667	100	PROMOBI.PNAC	30
Dalila	-87.0291	20.3488	2014	40.8333	100	PROMOBI.PNAC	20
Dalila	-87.0291	20.3488	2014	36.6667	100	PROMOBI.PNAC	20
Dalila	-87.0291	20.3488	2014	23.3333	100	PROMOBI.PNAC	13
Dalila	-87.0291	20.3488	2014	33.3333	100	PROMOBI.PNAC	13
Dalila	-87.0291	20.3488	2014	27.5	100	PROMOBI.PNAC	8
Dalila	-87.0291	20.3488	2014	40.8333	100	PROMOBI.PNAC	7
Dalila	-87.0291	20.3488	2014	37.5	100	PROMOBI.PNAC	6
Dalila	-87.0291	20.3488	2014	30	100	PROMOBI.PNAC	8
Dalila	-87.0291	20.3488	2015	11.6667	100	PROMOBI.PNAC	13
Dalila	-87.0291	20.3488	2015	15	100	PROMOBI.PNAC	5
Dalila	-87.0291	20.3488	2015	7.5	100	PROMOBI.PNAC	8
Dalila	-87.0291	20.3488	2015	6.66667	100	PROMOBI.PNAC	8
Dalila	-87.0291	20.3488	2015	5.83333	100	PROMOBI.PNAC	13
Dalila	-87.0291	20.3488	2015	8.33333	100	PROMOBI.PNAC	7
Dalila	-87.0291	20.3488	2016	5	100	CONACYT.247104	3
Dalila	-87.0291	20.3488	2016	17	100	CONACYT.247104	5
Dalila	-87.0291	20.3488	2016	43	100	CONACYT.247104	27
Dalila	-87.0291	20.3488	2016	13	100	CONACYT.247104	14
Dalila	-87.0291	20.3488	2016	32	100	CONACYT.247104	18
Dalila	-87.0291	20.3488	2016	26	100	CONACYT.247104	11
DzulHaMERASomero	-86.9871	20.4588	2009	0	100	MERA.PNAC	33
DzulHaMERASomero	-86.9871	20.4588	2009	0	100	MERA.PNAC	40
DzulHaMERASomero	-86.9871	20.4588	2009	2.5	100	MERA.PNAC	35
DzulHaMERASomero	-86.9871	20.4588	2009	0	100	MERA.PNAC	6
DzulHaMERASomero	-86.9871	20.4588	2009	0	100	MERA.PNAC	29
DzulHaMERASomero	-86.9871	20.4588	2009	1.66667	100	MERA.PNAC	30
DzulHaMERASomero	-86.9871	20.4588	2011	2.5	100	MERA.PNAC	13
DzulHaMERASomero	-86.9871	20.4588	2011	4.16667	100	MERA.PNAC	12
DzulHaMERASomero	-86.9871	20.4588	2011	5	100	MERA.PNAC	10
DzulHaMERASomero	-86.9871	20.4588	2011	5	100	MERA.PNAC	12
DzulHaMERASomero	-86.9871	20.4588	2011	4.16667	100	MERA.PNAC	11
DzulHaMERASomero	-86.9871	20.4588	2011	2.5	100	MERA.PNAC	8
DzulHaMERASomero	-86.9871	20.4588	2014	0.833333	100	MERA.PNAC	72
DzulHaMERASomero	-86.9871	20.4588	2014	5	100	MERA.PNAC	78
DzulHaMERASomero	-86.9871	20.4588	2014	1.66667	100	MERA.PNAC	63
DzulHaMERASomero	-86.9871	20.4588	2014	1.66667	100	MERA.PNAC	61
DzulHaMERASomero	-86.9871	20.4588	2014	4.16667	100	MERA.PNAC	74
DzulHaMERASomero	-86.9871	20.4588	2014	2.5	100	MERA.PNAC	63
HananII	-86.761	20.499	2016	19	100	CONACYT.247104	53
HananII	-86.761	20.499	2016	15	100	CONACYT.247104	34
HananII	-86.761	20.499	2016	17	100	CONACYT.247104	40
HananII	-86.761	20.499	2016	7	100	CONACYT.247104	58
HananII	-86.761	20.499	2016	11	100	CONACYT.247104	51
HananII	-86.761	20.499	2016	10	100	CONACYT.247104	65
HananII	-86.761	20.499	2005	17.5	100	Monitoreo.PNAC	52.5
HananII	-86.761	20.499	2005	17.5	100	Monitoreo.PNAC	59.1667
HananII	-86.761	20.499	2005	14.1667	100	Monitoreo.PNAC	44.1667
HananII	-86.761	20.499	2005	10.8333	100	Monitoreo.PNAC	50.8333
HananII	-86.761	20.499	2005	15.8333	100	Monitoreo.PNAC	48.3333
HananII	-86.761	20.499	2005	6.66667	100	Monitoreo.PNAC	60.8333
HananII	-86.761	20.499	2015	13.3333	100	PROMOBI.PNAC	40.8333
HananII	-86.761	20.499	2015	19.1667	100	PROMOBI.PNAC	32.5
HananII	-86.761	20.499	2015	6.66667	100	PROMOBI.PNAC	23.3333
Islote	-87.0023	20.2703	2005	15.8333	100	Monitoreo.PNAC	2
Islote	-87.0023	20.2703	2005	8.33333	100	Monitoreo.PNAC	4
Islote	-87.0023	20.2703	2005	11.6667	100	Monitoreo.PNAC	5
Islote	-87.0023	20.2703	2005	3.33333	100	Monitoreo.PNAC	4
Islote	-87.0023	20.2703	2005	10	100	Monitoreo.PNAC	3
Islote	-87.0023	20.2703	2005	5.83333	100	Monitoreo.PNAC	6
Islote	-87.0023	20.2703	2007	10	100	Monitoreo.PNAC	18
Islote	-87.0023	20.2703	2007	9.16667	100	Monitoreo.PNAC	16
Islote	-87.0023	20.2703	2007	23.3333	100	Monitoreo.PNAC	22
Islote	-87.0023	20.2703	2007	8.33333	100	Monitoreo.PNAC	18
Islote	-87.0023	20.2703	2007	13.3333	100	Monitoreo.PNAC	14
Islote	-87.0023	20.2703	2007	20	100	Monitoreo.PNAC	17
Islote	-87.0023	20.2703	2008	9.16667	100	Monitoreo.PNAC	18
Islote	-87.0023	20.2703	2008	5	100	Monitoreo.PNAC	15
Islote	-87.0023	20.2703	2008	9.16667	100	Monitoreo.PNAC	16
Islote	-87.0023	20.2703	2008	5.83333	100	Monitoreo.PNAC	16
Islote	-87.0023	20.2703	2008	10.8333	100	Monitoreo.PNAC	19
Islote	-87.0023	20.2703	2008	15.8333	100	Monitoreo.PNAC	16
Jardines	-86.8802	20.8314	2006	14.6	100	PNAPM-CONANP.SF	28
Jardines	-86.8802	20.8314	2008	22.5	100	Monitoreo.PNAPM	7
Jardines	-86.8802	20.8314	2008	13.3333	100	Monitoreo.PNAPM	12
Jardines	-86.8802	20.8314	2008	18.3333	100	Monitoreo.PNAPM	10
Jardines	-86.8802	20.8314	2010	8.33333	100	Monitoreo.PNAPM	38
Jardines	-86.8802	20.8314	2010	20	100	Monitoreo.PNAPM	25
Jardines	-86.8802	20.8314	2010	23.3333	100	Monitoreo.PNAPM	35
Jardines	-86.8802	20.8314	2011	22.5	100	Monitoreo.PNAPM	31
Jardines	-86.8802	20.8314	2011	10	100	Monitoreo.PNAPM	43
Jardines	-86.8802	20.8314	2011	15.8333	100	Monitoreo.PNAPM	38
Jardines	-86.8802	20.8314	2011	5.83333	100	Monitoreo.PNAPM	47
Jardines	-86.8802	20.8314	2011	6.66667	100	Monitoreo.PNAPM	49
Jardines	-86.8802	20.8314	2012	7.5	100	PROMOBI.PNAPM	46
Jardines	-86.8802	20.8314	2012	43.1193	100	PROMOBI.PNAPM	13
Jardines	-86.8802	20.8314	2012	22.5	100	PROMOBI.PNAPM	48
Jardines	-86.8802	20.8314	2012	20	100	PROMOBI.PNAPM	23
Jardines	-86.8802	20.8314	2012	10.687	100	PROMOBI.PNAPM	36
Jardines	-86.8802	20.8314	2013	12.5	100	PROMOBI.PNAPM	31
Jardines	-86.8802	20.8314	2013	9.16667	100	PROMOBI.PNAPM	33
Jardines	-86.8802	20.8314	2013	21.6667	100	PROMOBI.PNAPM	30
Jardines	-86.8802	20.8314	2013	20	100	PROMOBI.PNAPM	43
Jardines	-86.8802	20.8314	2013	16.6667	100	PROMOBI.PNAPM	26
Jardines	-86.8802	20.8314	2014	10	100	PROMOBI.PNAPM	25
Jardines	-86.8802	20.8314	2014	10	100	PROMOBI.PNAPM	40
Jardines	-86.8802	20.8314	2014	20	100	PROMOBI.PNAPM	21
Jardines	-86.8802	20.8314	2014	7.5	100	PROMOBI.PNAPM	36
Jardines	-86.8802	20.8314	2014	14.1667	100	PROMOBI.PNAPM	31
Jardines	-86.8802	20.8314	2015	5.83333	100	PROMOBI.PNAPM	25
Jardines	-86.8802	20.8314	2015	2.5	100	PROMOBI.PNAPM	28
Jardines	-86.8802	20.8314	2015	3.33333	100	PROMOBI.PNAPM	62
Jardines	-86.8802	20.8314	2015	10	100	PROMOBI.PNAPM	33
Jardines	-86.8802	20.8314	2015	8.33333	100	PROMOBI.PNAPM	51
Jardines	-86.8802	20.8314	2016	8	100	Msthesis.MOG	13
Jardines	-86.8802	20.8314	2016	18	100	Msthesis.MOG	21
Jardines	-86.8802	20.8314	2016	20	100	Msthesis.MOG	30
Jardines	-86.8802	20.8314	2016	10	100	Msthesis.MOG	11
Jardines	-86.8802	20.8314	2016	5	100	Monitoreo.PNAPM	20
Jardines	-86.8802	20.8314	2016	11	100	Monitoreo.PNAPM	19
Jardines	-86.8802	20.8314	2016	13	100	Monitoreo.PNAPM	20
Jardines	-86.8802	20.8314	2016	2	100	Monitoreo.PNAPM	50
Jardines	-86.8802	20.8314	2016	0	100	Monitoreo.PNAPM	78
Jardines	-86.8802	20.8314	2016	8	100	Monitoreo.PNAPM	46
Jardines	-86.8802	20.8314	2016	26	100	Monitoreo.PNAPM	37
Jardines	-86.8802	20.8314	2016	0	100	Monitoreo.PNAPM	71
LaBocana	-86.8411	20.8864	2007	8	100	SNIB.CONABIO	20.5
LaBocana	-86.8411	20.8864	2007	0.3	100	SNIB.CONABIO	25.5
LaBocana	-86.8411	20.8864	2007	14.2	100	SNIB.CONABIO	14.5
LaBocana	-86.8411	20.8864	2007	0	100	SNIB.CONABIO	17.5
LaBocana	-86.8411	20.8864	2007	1.1	100	SNIB.CONABIO	19.5
LaBocana	-86.8411	20.8864	2010	0.833333	100	Monitoreo.PNAPM	42.5
LaBocana	-86.8411	20.8864	2010	28.3333	100	Monitoreo.PNAPM	36.6667
LaBocana	-86.8411	20.8864	2010	21.6667	100	Monitoreo.PNAPM	35
LaBocana	-86.8411	20.8864	2010	8.33333	100	Monitoreo.PNAPM	44.1667
LaBocana	-86.8411	20.8864	2010	6.66667	100	Monitoreo.PNAPM	35
LaBocana	-86.8411	20.8864	2012	11.6667	100	PROMOBI.PNAPM	24.1667
LaBocana	-86.8411	20.8864	2012	24.1667	100	PROMOBI.PNAPM	29.1667
LaBocana	-86.8411	20.8864	2012	31.6667	100	PROMOBI.PNAPM	30.8333
LaBocana	-86.8411	20.8864	2012	30	100	PROMOBI.PNAPM	14.1667
LaBocana	-86.8411	20.8864	2012	23.3333	100	PROMOBI.PNAPM	20
LaBocana	-86.8411	20.8864	2013	10.8333	100	PROMOBI.PNAPM	32.5
LaBocana	-86.8411	20.8864	2013	29.1667	100	PROMOBI.PNAPM	18.3333
LaBocana	-86.8411	20.8864	2013	20.8333	100	PROMOBI.PNAPM	3.33333
LaBocana	-86.8411	20.8864	2013	32.5	100	PROMOBI.PNAPM	16.6667
LaBocana	-86.8411	20.8864	2013	23.3333	100	PROMOBI.PNAPM	35
LaBocana	-86.8411	20.8864	2014	15	100	PROMOBI.PNAPM	34.1667
LaBocana	-86.8411	20.8864	2014	25	100	PROMOBI.PNAPM	40
LaBocana	-86.8411	20.8864	2014	28.3333	100	PROMOBI.PNAPM	24.1667
LaBocana	-86.8411	20.8864	2014	5	100	PROMOBI.PNAPM	25.8333
LaBocana	-86.8411	20.8864	2014	25.8333	100	PROMOBI.PNAPM	30.8333
LaBocana	-86.8411	20.8864	2015	4.16667	100	PROMOBI.PNAPM	18.3333
LaBocana	-86.8411	20.8864	2015	21.6667	100	PROMOBI.PNAPM	28.3333
LaBocana	-86.8411	20.8864	2015	27.5	100	PROMOBI.PNAPM	7.5
LaBocana	-86.8411	20.8864	2015	5.83333	100	PROMOBI.PNAPM	12.5
LaBocana	-86.8411	20.8864	2015	15.8333	100	PROMOBI.PNAPM	21.6667
LaBocana	-86.8411	20.8864	2016	5	100	Msthesis.MOG	26
LaBocana	-86.8411	20.8864	2016	16	100	Msthesis.MOG	20
LaBocana	-86.8411	20.8864	2016	5	100	Msthesis.MOG	12
LaBocana	-86.8411	20.8864	2016	19	100	Msthesis.MOG	6
LaBocana	-86.8411	20.8864	2016	41	100	Monitoreo.PNAPM	16
LaBocana	-86.8411	20.8864	2016	5	100	Monitoreo.PNAPM	76
LaBocana	-86.8411	20.8864	2016	10	100	Monitoreo.PNAPM	61
LaBocana	-86.8411	20.8864	2016	19	100	Monitoreo.PNAPM	46
LaBocana	-86.8411	20.8864	2016	27	100	Monitoreo.PNAPM	61
LaBocana	-86.8411	20.8864	2016	0	100	Monitoreo.PNAPM	93
LaBocana	-86.8411	20.8864	2016	18	100	Monitoreo.PNAPM	24
LaBocana	-86.8411	20.8864	2016	41	100	Monitoreo.PNAPM	10
LaBocana	-86.8411	20.8864	2016	26	100	Monitoreo.PNAPM	19
LaPared	-86.8762	20.8242	2007	0	100	SNIB.CONABIO	7
LaPared	-86.8762	20.8242	2007	10.7	100	SNIB.CONABIO	16
LaPared	-86.8762	20.8242	2007	9	100	SNIB.CONABIO	11
LaPared	-86.8762	20.8242	2007	23.5	100	SNIB.CONABIO	7
LaPared	-86.8762	20.8242	2007	8.7	100	SNIB.CONABIO	22
LaPared	-86.8762	20.8242	2010	12.5	100	Monitoreo.PNAPM	40
LaPared	-86.8762	20.8242	2010	15	100	Monitoreo.PNAPM	34
LaPared	-86.8762	20.8242	2010	6.61157	100	Monitoreo.PNAPM	21
LaPared	-86.8762	20.8242	2010	11.7647	100	Monitoreo.PNAPM	19
LaPared	-86.8762	20.8242	2010	12.5	100	Monitoreo.PNAPM	14
LaPared	-86.8762	20.8242	2012	14.1667	100	PROMOBI.PNAPM	6
LaPared	-86.8762	20.8242	2012	9.16667	100	PROMOBI.PNAPM	22
LaPared	-86.8762	20.8242	2012	13.3333	100	PROMOBI.PNAPM	33
LaPared	-86.8762	20.8242	2012	24.1667	100	PROMOBI.PNAPM	18
LaPared	-86.8762	20.8242	2013	8.33333	100	PROMOBI.PNAPM	15
LaPared	-86.8762	20.8242	2013	19.1667	100	PROMOBI.PNAPM	11
LaPared	-86.8762	20.8242	2013	14.1667	100	PROMOBI.PNAPM	23
LaPared	-86.8762	20.8242	2013	1.66667	100	PROMOBI.PNAPM	22
LaPared	-86.8762	20.8242	2013	9.16667	100	PROMOBI.PNAPM	25
LaPared	-86.8762	20.8242	2014	10	100	PROMOBI.PNAPM	12
LaPared	-86.8762	20.8242	2014	10	100	PROMOBI.PNAPM	15
LaPared	-86.8762	20.8242	2014	9.16667	100	PROMOBI.PNAPM	33
LaPared	-86.8762	20.8242	2014	15	100	PROMOBI.PNAPM	35
LaPared	-86.8762	20.8242	2014	5	100	PROMOBI.PNAPM	20
LaPared	-86.8762	20.8242	2015	9.16667	100	PROMOBI.PNAPM	31
LaPared	-86.8762	20.8242	2015	12.5	100	PROMOBI.PNAPM	3
LaPared	-86.8762	20.8242	2015	8.33333	100	PROMOBI.PNAPM	38
LaPared	-86.8762	20.8242	2015	16.6667	100	PROMOBI.PNAPM	42
LaPared	-86.8762	20.8242	2015	14.1667	100	PROMOBI.PNAPM	17
LaPared	-86.8762	20.8242	2016	14	100	Msthesis.MOG	23
LaPared	-86.8762	20.8242	2016	24	100	Msthesis.MOG	30
LaPared	-86.8762	20.8242	2016	12	100	Msthesis.MOG	14
LaPared	-86.8762	20.8242	2016	14	100	Msthesis.MOG	6
LaPared	-86.8762	20.8242	2016	8	100	Monitoreo.PNAPM	25
LaPared	-86.8762	20.8242	2016	6	100	Monitoreo.PNAPM	21
LaPared	-86.8762	20.8242	2016	40	100	Monitoreo.PNAPM	14
LaPared	-86.8762	20.8242	2016	5	100	Monitoreo.PNAPM	19
LaPared	-86.8762	20.8242	2016	3	100	Monitoreo.PNAPM	19
LaPared	-86.8762	20.8242	2016	3	100	Monitoreo.PNAPM	27
LaPared	-86.8762	20.8242	2016	3	100	Monitoreo.PNAPM	33
LaPared	-86.8762	20.8242	2016	1	100	Monitoreo.PNAPM	41
Limones	-86.7972	20.9885	2005	15.4	100	PNAPM-CONANP.SF	9
Limones	-86.7972	20.9885	2006	10.9	100	PNAPM-CONANP.SF	24
Limones	-86.7972	20.9885	2016	46	100	Msthesis.MOG	16
Limones	-86.7972	20.9885	2016	8	100	Msthesis.MOG	11
Limones	-86.7972	20.9885	2016	38	100	Msthesis.MOG	16
Limones	-86.7972	20.9885	2016	7	100	Msthesis.MOG	10
Limones	-86.7972	20.9885	2016	53	100	Monitoreo.PNAPM	15
Limones	-86.7972	20.9885	2016	65	100	Monitoreo.PNAPM	5
Limones	-86.7972	20.9885	2016	56	100	Monitoreo.PNAPM	11
Limones	-86.7972	20.9885	2016	44	100	Monitoreo.PNAPM	17
Limones	-86.7972	20.9885	2016	10	100	Monitoreo.PNAPM	16
Limones	-86.7972	20.9885	2016	33	100	Monitoreo.PNAPM	3
Limones	-86.7972	20.9885	2016	80	100	Monitoreo.PNAPM	4
Limones	-86.7972	20.9885	2016	59	100	Monitoreo.PNAPM	7
Limones	-86.7972	20.9885	2008	13.3333	100	Monitoreo.PNAPM	12
Limones	-86.7972	20.9885	2008	9.16667	100	Monitoreo.PNAPM	12
Limones	-86.7972	20.9885	2008	15.8333	100	Monitoreo.PNAPM	30
Limones	-86.7972	20.9885	2008	15	100	Monitoreo.PNAPM	5
Limones	-86.7972	20.9885	2008	25	100	Monitoreo.PNAPM	18
Limones	-86.7972	20.9885	2010	23.3333	100	Monitoreo.PNAPM	28
Limones	-86.7972	20.9885	2010	10.8333	100	Monitoreo.PNAPM	27
Limones	-86.7972	20.9885	2010	13.3333	100	Monitoreo.PNAPM	36
Limones	-86.7972	20.9885	2010	18.3333	100	Monitoreo.PNAPM	19
Limones	-86.7972	20.9885	2010	18.3333	100	Monitoreo.PNAPM	19
Limones	-86.7972	20.9885	2011	14.1667	100	Monitoreo.PNAPM	42
Limones	-86.7972	20.9885	2011	12.5	100	Monitoreo.PNAPM	26
Limones	-86.7972	20.9885	2011	25.8333	100	Monitoreo.PNAPM	19
Limones	-86.7972	20.9885	2011	15	100	Monitoreo.PNAPM	17
Limones	-86.7972	20.9885	2011	22.5	100	Monitoreo.PNAPM	27
Limones	-86.7972	20.9885	2012	29.1667	100	PROMOBI.PNAPM	19
Limones	-86.7972	20.9885	2012	20.8333	100	PROMOBI.PNAPM	40
Limones	-86.7972	20.9885	2012	15.8333	100	PROMOBI.PNAPM	25
Limones	-86.7972	20.9885	2012	15	100	PROMOBI.PNAPM	40
Limones	-86.7972	20.9885	2012	6.66667	100	PROMOBI.PNAPM	35
Limones	-86.7972	20.9885	2013	48.3333	100	PROMOBI.PNAPM	2.5
Limones	-86.7972	20.9885	2013	22.5	100	PROMOBI.PNAPM	18
Limones	-86.7972	20.9885	2013	18.3333	100	PROMOBI.PNAPM	22
Limones	-86.7972	20.9885	2013	25.8333	100	PROMOBI.PNAPM	12
Limones	-86.7972	20.9885	2013	4.16667	100	PROMOBI.PNAPM	21
Limones	-86.7972	20.9885	2014	33.3333	100	PROMOBI.PNAPM	5
Limones	-86.7972	20.9885	2014	24.1667	100	PROMOBI.PNAPM	33
Limones	-86.7972	20.9885	2014	20	100	PROMOBI.PNAPM	30
Limones	-86.7972	20.9885	2014	13.3333	100	PROMOBI.PNAPM	38
Limones	-86.7972	20.9885	2014	7.5	100	PROMOBI.PNAPM	10
Limones	-86.7972	20.9885	2015	44.1667	100	PROMOBI.PNAPM	13
Limones	-86.7972	20.9885	2015	18.3333	100	PROMOBI.PNAPM	6
Limones	-86.7972	20.9885	2015	23.3333	100	PROMOBI.PNAPM	8
Limones	-86.7972	20.9885	2015	14.1667	100	PROMOBI.PNAPM	16
Limones	-86.7972	20.9885	2015	11.6667	100	PROMOBI.PNAPM	3
Mah01	-87.7164	18.6626	2012	24	100	HRI	30
Mah01	-87.7164	18.6626	2012	8	100	HRI	38
Mah01	-87.7164	18.6626	2012	12	100	HRI	42
Mah01	-87.7164	18.6626	2012	8	100	HRI	23
Mah01	-87.7164	18.6626	2012	8	100	HRI	34
Mah01	-87.7164	18.6626	2012	7	100	HRI	65
Mah01	-87.7164	18.6626	2014	9	100	HRI	45
Mah01	-87.7164	18.6626	2014	2	100	HRI	39
Mah01	-87.7164	18.6626	2014	9	100	HRI	38
Mah01	-87.7164	18.6626	2014	3	100	HRI	57
Mah01	-87.7164	18.6626	2014	26	100	HRI	37
Mah01	-87.7164	18.6626	2014	8	100	HRI	51
Mah01	-87.7164	18.6626	2016	15	100	HRI	22
Mah01	-87.7164	18.6626	2016	23	100	HRI	36
Mah01	-87.7164	18.6626	2016	6	100	HRI	38
Mah01	-87.7164	18.6626	2016	7	100	HRI	33
Mah01	-87.7164	18.6626	2016	4	100	HRI	36
Mah01	-87.7164	18.6626	2016	9	100	HRI	65
Mah01	-87.7164	18.6626	2016	15	100	CONACYT.247104	22
Mah01	-87.7164	18.6626	2016	15	100	CONACYT.247104	19
Mah01	-87.7164	18.6626	2016	4	100	CONACYT.247104	36
Mah01	-87.7164	18.6626	2016	12	100	CONACYT.247104	38
Mah01	-87.7164	18.6626	2016	11	100	CONACYT.247104	29
Mah01	-87.7164	18.6626	2016	12	100	CONACYT.247104	40
MX1008	-87.4606	20.057	2005	20.1	100	HRI	0
MX1008	-87.4606	20.057	2005	26.4	100	HRI	3
MX1008	-87.4606	20.057	2005	17.7	100	HRI	33
MX1008	-87.4606	20.057	2005	25.5	100	HRI	11
MX1008	-87.4606	20.057	2012	20	100	HRI	63
MX1008	-87.4606	20.057	2012	12	100	HRI	58
MX1008	-87.4606	20.057	2012	10	100	HRI	52
MX1008	-87.4606	20.057	2012	22	100	HRI	37
MX1008	-87.4606	20.057	2012	42	100	HRI	23
MX1008	-87.4606	20.057	2012	33	100	HRI	46
MX1008	-87.4606	20.057	2014	39	100	HRI	17
MX1008	-87.4606	20.057	2014	39	100	HRI	24
MX1008	-87.4606	20.057	2014	33	100	HRI	50
MX1008	-87.4606	20.057	2014	17	100	HRI	42
MX1008	-87.4606	20.057	2014	21	100	HRI	25
MX1008	-87.4606	20.057	2014	24	100	HRI	43
MX1008	-87.4606	20.057	2016	30	100	HRI	36
MX1008	-87.4606	20.057	2016	14	100	HRI	43
MX1008	-87.4606	20.057	2016	20	100	HRI	46
MX1008	-87.4606	20.057	2016	38	100	HRI	37
MX1008	-87.4606	20.057	2016	30	100	HRI	55
MX1008	-87.4606	20.057	2016	27	100	HRI	52
MX1017	-86.7298	21.1706	2005	11	100	HRI	43
MX1017	-86.7298	21.1706	2005	6.7	100	HRI	26
MX1017	-86.7298	21.1706	2005	0.9	100	HRI	73
MX1017	-86.7298	21.1706	2005	11.5	100	HRI	44
MX1017	-86.7298	21.1706	2009	17	100	HRI	18
MX1017	-86.7298	21.1706	2009	21	100	HRI	43
MX1017	-86.7298	21.1706	2009	2.8	100	HRI	68
MX1017	-86.7298	21.1706	2009	10.6	100	HRI	42
MX1017	-86.7298	21.1706	2009	10.6	100	HRI	49
MX1017	-86.7298	21.1706	2009	12.9	100	HRI	39
MX1017	-86.7298	21.1706	2011	9	100	HRI	22
MX1017	-86.7298	21.1706	2011	10	100	HRI	21
MX1017	-86.7298	21.1706	2011	16	100	HRI	25
MX1017	-86.7298	21.1706	2011	10	100	HRI	18
MX1017	-86.7298	21.1706	2011	19	100	HRI	28
MX1017	-86.7298	21.1706	2011	2	100	HRI	25
MX1017	-86.7298	21.1706	2014	12	100	HRI	47
MX1017	-86.7298	21.1706	2014	11	100	HRI	30
MX1017	-86.7298	21.1706	2014	6	100	HRI	47
MX1017	-86.7298	21.1706	2014	13	100	HRI	49
MX1017	-86.7298	21.1706	2014	4	100	HRI	43
MX1017	-86.7298	21.1706	2014	18	100	HRI	43
MX1017	-86.7298	21.1706	2016	10	100	HRI	55
MX1017	-86.7298	21.1706	2016	17	100	HRI	44
MX1017	-86.7298	21.1706	2016	7	100	HRI	31
MX1017	-86.7298	21.1706	2016	22	100	HRI	16
MX1017	-86.7298	21.1706	2016	11	100	HRI	42
MX1017	-86.7298	21.1706	2016	8	100	HRI	44
MX1020	-87.7177	18.6497	2006	4.4	100	HRI	19
MX1020	-87.7177	18.6497	2006	2.3	100	HRI	3
MX1020	-87.7177	18.6497	2006	2.8	100	HRI	0
MX1020	-87.7177	18.6497	2012	10	100	HRI	21
MX1020	-87.7177	18.6497	2012	16	100	HRI	15
MX1020	-87.7177	18.6497	2012	13	100	HRI	20
MX1020	-87.7177	18.6497	2012	11	100	HRI	36
MX1020	-87.7177	18.6497	2012	13	100	HRI	32
MX1020	-87.7177	18.6497	2012	15	100	HRI	42
MX1020	-87.7177	18.6497	2014	6	100	HRI	39
MX1020	-87.7177	18.6497	2014	12	100	HRI	60
MX1020	-87.7177	18.6497	2014	14	100	HRI	36
MX1020	-87.7177	18.6497	2014	21	100	HRI	46
MX1020	-87.7177	18.6497	2014	22	100	HRI	60
MX1020	-87.7177	18.6497	2014	14	100	HRI	49
MX1020	-87.7177	18.6497	2016	27	100	HRI	48
MX1020	-87.7177	18.6497	2016	23	100	HRI	46
MX1020	-87.7177	18.6497	2016	15	100	HRI	40
MX1020	-87.7177	18.6497	2016	14	100	HRI	21
MX1020	-87.7177	18.6497	2016	17	100	HRI	23
MX1020	-87.7177	18.6497	2016	21	100	HRI	31
MX1020	-87.7177	18.6497	2016	6	100	CONACYT.247104	31
MX1020	-87.7177	18.6497	2016	0	100	CONACYT.247104	0
MX1020	-87.7177	18.6497	2016	17	100	CONACYT.247104	48
MX1020	-87.7177	18.6497	2016	24	100	CONACYT.247104	24
MX1020	-87.7177	18.6497	2016	19	100	CONACYT.247104	37
MX1020	-87.7177	18.6497	2016	27	100	CONACYT.247104	38
MX1020	-87.7177	18.6497	2016	35	100	CONACYT.247104	31
MX1042	-87.4579	20.1153	2005	12.1	100	HRI	11
MX1042	-87.4579	20.1153	2005	7.3	100	HRI	2
MX1042	-87.4579	20.1153	2005	4.9	100	HRI	2
MX1042	-87.4579	20.1153	2005	5.3	100	HRI	7
MX1042	-87.4579	20.1153	2012	8	100	HRI	18
MX1042	-87.4579	20.1153	2012	8	100	HRI	32
MX1042	-87.4579	20.1153	2012	40	100	HRI	36
MX1042	-87.4579	20.1153	2012	31	100	HRI	31
MX1042	-87.4579	20.1153	2012	44	100	HRI	25
MX1042	-87.4579	20.1153	2012	16	100	HRI	33
MX1042	-87.4579	20.1153	2014	4	100	HRI	15
MX1042	-87.4579	20.1153	2014	4	100	HRI	27
MX1042	-87.4579	20.1153	2014	10	100	HRI	63
MX1042	-87.4579	20.1153	2014	1	100	HRI	15
MX1042	-87.4579	20.1153	2014	4	100	HRI	48
MX1042	-87.4579	20.1153	2014	4	100	HRI	38
MX1042	-87.4579	20.1153	2016	5	100	HRI	25
MX1042	-87.4579	20.1153	2016	4	100	HRI	29
MX1042	-87.4579	20.1153	2016	13	100	HRI	23
MX1042	-87.4579	20.1153	2016	4	100	HRI	23
MX1042	-87.4579	20.1153	2016	16	100	HRI	15
MX1042	-87.4579	20.1153	2016	12	100	HRI	21
MX1043	-87.3854	20.2586	2005	2.9	100	HRI	11
MX1043	-87.3854	20.2586	2005	6.2	100	HRI	3
MX1043	-87.3854	20.2586	2005	3.1	100	HRI	9
MX1043	-87.3854	20.2586	2005	11.1	100	HRI	17
MX1043	-87.3854	20.2586	2009	34.6	100	HRI	17
MX1043	-87.3854	20.2586	2009	18.6	100	HRI	25
MX1043	-87.3854	20.2586	2009	11.1	100	HRI	34
MX1043	-87.3854	20.2586	2009	14.8	100	HRI	36
MX1043	-87.3854	20.2586	2009	32	100	HRI	15
MX1043	-87.3854	20.2586	2009	8.9	100	HRI	27
MX1043	-87.3854	20.2586	2011	5	100	HRI	10
MX1043	-87.3854	20.2586	2011	12	100	HRI	14
MX1043	-87.3854	20.2586	2011	24	100	HRI	12
MX1043	-87.3854	20.2586	2011	18	100	HRI	11
MX1043	-87.3854	20.2586	2011	7	100	HRI	13
MX1043	-87.3854	20.2586	2011	18	100	HRI	21
MX1043	-87.3854	20.2586	2014	2	100	HRI	2
MX1043	-87.3854	20.2586	2014	6	100	HRI	6
MX1043	-87.3854	20.2586	2014	5	100	HRI	11
MX1043	-87.3854	20.2586	2014	13	100	HRI	20
MX1043	-87.3854	20.2586	2014	5	100	HRI	28
MX1043	-87.3854	20.2586	2014	7	100	HRI	15
MX1043	-87.3854	20.2586	2016	5	100	HRI	40
MX1043	-87.3854	20.2586	2016	8	100	HRI	41
MX1043	-87.3854	20.2586	2016	9	100	HRI	28
MX1043	-87.3854	20.2586	2016	18	100	HRI	37
MX1043	-87.3854	20.2586	2016	40	100	HRI	12
MX1043	-87.3854	20.2586	2016	45	100	HRI	11
MX1048	-87.0282	20.3584	2005	12.1	100	HRI	0
MX1048	-87.0282	20.3584	2005	11.2	100	HRI	5
MX1048	-87.0282	20.3584	2009	4.7	100	HRI	3
MX1048	-87.0282	20.3584	2009	10.4	100	HRI	5
MX1048	-87.0282	20.3584	2009	14.3	100	HRI	5
MX1048	-87.0282	20.3584	2009	10.7	100	HRI	4
MX1048	-87.0282	20.3584	2009	11	100	HRI	9
MX1048	-87.0282	20.3584	2009	7.5	100	HRI	0
MX1048	-87.0282	20.3584	2011	1	100	HRI	21
MX1048	-87.0282	20.3584	2011	10	100	HRI	10
MX1048	-87.0282	20.3584	2011	7	100	HRI	29
MX1048	-87.0282	20.3584	2011	7	100	HRI	4
MX1048	-87.0282	20.3584	2011	8	100	HRI	25
MX1048	-87.0282	20.3584	2011	21	100	HRI	15
MX1048	-87.0282	20.3584	2014	22	100	HRI	29
MX1048	-87.0282	20.3584	2014	13	100	HRI	23
MX1048	-87.0282	20.3584	2014	14	100	HRI	21
MX1048	-87.0282	20.3584	2014	12	100	HRI	15
MX1048	-87.0282	20.3584	2014	9	100	HRI	15
MX1048	-87.0282	20.3584	2014	10	100	HRI	43
MX1048	-87.0282	20.3584	2016	6	100	HRI	33
MX1048	-87.0282	20.3584	2016	22	100	HRI	18
MX1048	-87.0282	20.3584	2016	12	100	HRI	58
MX1048	-87.0282	20.3584	2016	9	100	HRI	11
MX1048	-87.0282	20.3584	2016	4	100	HRI	14
MX1048	-87.0282	20.3584	2016	35	100	HRI	33
MX1050	-87.1645	20.5363	2005	5.6	100	HRI	11
MX1050	-87.1645	20.5363	2005	3.4	100	HRI	5
MX1050	-87.1645	20.5363	2005	2.3	100	HRI	1
MX1050	-87.1645	20.5363	2005	5.7	100	HRI	7
MX1050	-87.1645	20.5363	2012	3	100	HRI	44
MX1050	-87.1645	20.5363	2012	8	100	HRI	15
MX1050	-87.1645	20.5363	2012	15	100	HRI	16
MX1050	-87.1645	20.5363	2012	5	100	HRI	19
MX1050	-87.1645	20.5363	2012	11	100	HRI	23
MX1050	-87.1645	20.5363	2012	12	100	HRI	20
MX1050	-87.1645	20.5363	2014	8	100	HRI	12
MX1050	-87.1645	20.5363	2014	7	100	HRI	7
MX1050	-87.1645	20.5363	2014	18	100	HRI	14
MX1050	-87.1645	20.5363	2014	5	100	HRI	23
MX1050	-87.1645	20.5363	2014	16	100	HRI	14
MX1050	-87.1645	20.5363	2016	10	100	HRI	18
MX1050	-87.1645	20.5363	2016	12	100	HRI	8
MX1050	-87.1645	20.5363	2016	16	100	HRI	14
MX1050	-87.1645	20.5363	2016	9	100	HRI	4
MX1050	-87.1645	20.5363	2016	12	100	HRI	7
MX1050	-87.1645	20.5363	2016	28	100	HRI	10
MX1053	-86.9707	20.4862	2005	8.8	100	HRI	1
MX1053	-86.9707	20.4862	2005	15.8	100	HRI	6
MX1053	-86.9707	20.4862	2005	7	100	HRI	3
MX1053	-86.9707	20.4862	2005	3.4	100	HRI	3
MX1053	-86.9707	20.4862	2009	21.6	100	HRI	1
MX1053	-86.9707	20.4862	2009	15.9	100	HRI	3
MX1053	-86.9707	20.4862	2009	13.4	100	HRI	1
MX1053	-86.9707	20.4862	2009	6.7	100	HRI	0
MX1053	-86.9707	20.4862	2009	1.9	100	HRI	0
MX1053	-86.9707	20.4862	2009	7.7	100	HRI	3
MX1053	-86.9707	20.4862	2011	1	100	HRI	1
MX1053	-86.9707	20.4862	2011	1	100	HRI	17
MX1053	-86.9707	20.4862	2011	4	100	HRI	2
MX1053	-86.9707	20.4862	2011	0	100	HRI	0
MX1053	-86.9707	20.4862	2011	4	100	HRI	0
MX1053	-86.9707	20.4862	2011	6	100	HRI	2
MX1053	-86.9707	20.4862	2014	3	100	HRI	15
MX1053	-86.9707	20.4862	2014	10	100	HRI	9
MX1053	-86.9707	20.4862	2014	16	100	HRI	6
MX1053	-86.9707	20.4862	2014	4	100	HRI	26
MX1053	-86.9707	20.4862	2014	1	100	HRI	40
MX1053	-86.9707	20.4862	2014	1	100	HRI	47
MX1053	-86.9707	20.4862	2016	15	100	HRI	0
MX1053	-86.9707	20.4862	2016	1	100	HRI	3
MX1053	-86.9707	20.4862	2016	2	100	HRI	3
MX1053	-86.9707	20.4862	2016	0	100	HRI	0
MX1053	-86.9707	20.4862	2016	2	100	HRI	5
MX1053	-86.9707	20.4862	2016	4	100	HRI	1
MX1055	-87.1061	20.5842	2005	4	100	HRI	4
MX1055	-87.1061	20.5842	2005	3.2	100	HRI	2
MX1055	-87.1061	20.5842	2005	2.6	100	HRI	5
MX1055	-87.1061	20.5842	2005	7.4	100	HRI	0
MX1055	-87.1061	20.5842	2005	0	100	HRI	5
MX1055	-87.1061	20.5842	2012	14	100	HRI	7
MX1055	-87.1061	20.5842	2012	5	100	HRI	7
MX1055	-87.1061	20.5842	2012	3	100	HRI	11
MX1055	-87.1061	20.5842	2012	0	100	HRI	15
MX1055	-87.1061	20.5842	2012	1	100	HRI	6
MX1055	-87.1061	20.5842	2012	0	100	HRI	13
MX1055	-87.1061	20.5842	2014	1	100	HRI	11
MX1055	-87.1061	20.5842	2014	2	100	HRI	9
MX1055	-87.1061	20.5842	2014	7	100	HRI	3
MX1055	-87.1061	20.5842	2014	3	100	HRI	18
MX1055	-87.1061	20.5842	2014	3	100	HRI	2
MX1055	-87.1061	20.5842	2014	6	100	HRI	19
MX1055	-87.1061	20.5842	2016	12	100	HRI	16
MX1055	-87.1061	20.5842	2016	11	100	HRI	11
MX1055	-87.1061	20.5842	2016	4	100	HRI	2
MX1055	-87.1061	20.5842	2016	5	100	HRI	10
MX1055	-87.1061	20.5842	2016	8	100	HRI	15
MX1055	-87.1061	20.5842	2016	14	100	HRI	13
MX1057	-87.0535	20.6406	2005	2.8	100	HRI	4
MX1057	-87.0535	20.6406	2005	0	100	HRI	2
MX1057	-87.0535	20.6406	2005	0.7	100	HRI	8
MX1057	-87.0535	20.6406	2005	1.8	100	HRI	6
MX1057	-87.0535	20.6406	2012	18	100	HRI	14
MX1057	-87.0535	20.6406	2012	7	100	HRI	40
MX1057	-87.0535	20.6406	2012	26	100	HRI	0
MX1057	-87.0535	20.6406	2012	12	100	HRI	29
MX1057	-87.0535	20.6406	2012	0	100	HRI	17
MX1057	-87.0535	20.6406	2012	1	100	HRI	28
MX1057	-87.0535	20.6406	2014	5	100	HRI	11
MX1057	-87.0535	20.6406	2014	16	100	HRI	5
MX1057	-87.0535	20.6406	2014	14	100	HRI	17
MX1057	-87.0535	20.6406	2014	3	100	HRI	12
MX1057	-87.0535	20.6406	2014	3	100	HRI	14
MX1057	-87.0535	20.6406	2014	21	100	HRI	2
MX1057	-87.0535	20.6406	2016	6	100	HRI	3
MX1057	-87.0535	20.6406	2016	9	100	HRI	8
MX1057	-87.0535	20.6406	2016	1	100	HRI	7
MX1057	-87.0535	20.6406	2016	0	100	HRI	8
MX1057	-87.0535	20.6406	2016	4	100	HRI	16
MX1057	-87.0535	20.6406	2016	9	100	HRI	16
MX1065	-87.7907	18.3531	2006	7.3	100	HRI	21
MX1065	-87.7907	18.3531	2006	9	100	HRI	13
MX1065	-87.7907	18.3531	2006	4.3	100	HRI	25
MX1065	-87.7907	18.3531	2006	7.2	100	HRI	17
MX1065	-87.7907	18.3531	2009	16.8	100	HRI	24
MX1065	-87.7907	18.3531	2009	15	100	HRI	34
MX1065	-87.7907	18.3531	2009	35.5	100	HRI	27
MX1065	-87.7907	18.3531	2009	12.8	100	HRI	31
MX1065	-87.7907	18.3531	2009	8.6	100	HRI	35
MX1065	-87.7907	18.3531	2012	0	100	HRI	1
MX1065	-87.7907	18.3531	2012	4	100	HRI	13
MX1065	-87.7907	18.3531	2012	4	100	HRI	20
MX1065	-87.7907	18.3531	2012	2	100	HRI	9
MX1065	-87.7907	18.3531	2012	1	100	HRI	13
MX1065	-87.7907	18.3531	2012	14	100	HRI	15
MX1065	-87.7907	18.3531	2014	6	100	HRI	46
MX1065	-87.7907	18.3531	2014	4	100	HRI	29
MX1065	-87.7907	18.3531	2014	12	100	HRI	38
MX1065	-87.7907	18.3531	2014	18	100	HRI	28
MX1065	-87.7907	18.3531	2014	19	100	HRI	24
MX1065	-87.7907	18.3531	2014	26	100	HRI	31
MX1065	-87.7907	18.3531	2016	33	100	HRI	34
MX1065	-87.7907	18.3531	2016	9	100	HRI	32
MX1065	-87.7907	18.3531	2016	24	100	HRI	48
MX1065	-87.7907	18.3531	2016	9	100	HRI	32
MX1065	-87.7907	18.3531	2016	8	100	HRI	42
MX1065	-87.7907	18.3531	2016	11	100	HRI	50
MX1065	-87.7907	18.3531	2016	10	100	CONACYT.247104	30
MX1065	-87.7907	18.3531	2016	14	100	CONACYT.247104	23
MX1065	-87.7907	18.3531	2016	10	100	CONACYT.247104	25
MX1065	-87.7907	18.3531	2016	13	100	CONACYT.247104	40
MX1065	-87.7907	18.3531	2016	8	100	CONACYT.247104	25
MX1065	-87.7907	18.3531	2016	13	100	CONACYT.247104	27
MX1116	-87.1492	20.551	2005	7.4	100	HRI	2
MX1116	-87.1492	20.551	2005	6.2	100	HRI	19
MX1116	-87.1492	20.551	2005	6.1	100	HRI	8
MX1116	-87.1492	20.551	2005	1.1	100	HRI	18
MX1116	-87.1492	20.551	2012	2	100	HRI	16
MX1116	-87.1492	20.551	2012	3	100	HRI	36
MX1116	-87.1492	20.551	2012	13	100	HRI	14
MX1116	-87.1492	20.551	2012	2	100	HRI	13
MX1116	-87.1492	20.551	2012	28	100	HRI	0
MX1116	-87.1492	20.551	2012	7	100	HRI	7
MX1116	-87.1492	20.551	2014	1	100	HRI	24
MX1116	-87.1492	20.551	2014	2	100	HRI	7
MX1116	-87.1492	20.551	2014	0	100	HRI	16
MX1116	-87.1492	20.551	2014	4	100	HRI	31
MX1116	-87.1492	20.551	2016	0	100	HRI	19
MX1116	-87.1492	20.551	2016	0	100	HRI	18
MX1116	-87.1492	20.551	2016	1	100	HRI	16
MX1116	-87.1492	20.551	2016	0	100	HRI	3
MX1116	-87.1492	20.551	2016	1	100	HRI	20
MX1116	-87.1492	20.551	2016	1	100	HRI	10
MX1117	-87.4191	20.218	2005	4.4	100	HRI	9
MX1117	-87.4191	20.218	2005	1.5	100	HRI	10
MX1117	-87.4191	20.218	2005	17.8	100	HRI	4
MX1117	-87.4191	20.218	2009	32	100	HRI	2
MX1117	-87.4191	20.218	2009	34.5	100	HRI	5
MX1117	-87.4191	20.218	2009	22.3	100	HRI	18
MX1117	-87.4191	20.218	2009	27.8	100	HRI	13
MX1117	-87.4191	20.218	2009	15.3	100	HRI	19
MX1117	-87.4191	20.218	2011	3	100	HRI	21
MX1117	-87.4191	20.218	2011	2	100	HRI	24
MX1117	-87.4191	20.218	2011	2	100	HRI	13
MX1117	-87.4191	20.218	2011	5	100	HRI	13
MX1117	-87.4191	20.218	2011	2	100	HRI	15
MX1117	-87.4191	20.218	2011	0	100	HRI	12
MX1117	-87.4191	20.218	2014	14	100	HRI	6
MX1117	-87.4191	20.218	2014	1	100	HRI	4
MX1117	-87.4191	20.218	2014	15	100	HRI	1
MX1117	-87.4191	20.218	2014	7	100	HRI	5
MX1117	-87.4191	20.218	2014	3	100	HRI	4
MX1117	-87.4191	20.218	2014	1	100	HRI	0
MX1117	-87.4191	20.218	2016	5	100	HRI	9
MX1117	-87.4191	20.218	2016	33	100	HRI	10
MX1117	-87.4191	20.218	2016	30	100	HRI	10
MX1117	-87.4191	20.218	2016	18	100	HRI	14
MX1117	-87.4191	20.218	2016	12	100	HRI	13
MX1117	-87.4191	20.218	2016	17	100	HRI	18
MX1131	-86.8288	20.9163	2005	6.2	100	HRI	20
MX1131	-86.8288	20.9163	2005	12	100	HRI	9
MX1131	-86.8288	20.9163	2005	24.6	100	HRI	37
MX1131	-86.8288	20.9163	2014	24	100	HRI	27
MX1131	-86.8288	20.9163	2014	49	100	HRI	16
MX1131	-86.8288	20.9163	2014	36	100	HRI	25
MX1131	-86.8288	20.9163	2014	25	100	HRI	17
MX1131	-86.8288	20.9163	2014	7	100	HRI	16
MX1131	-86.8288	20.9163	2014	10	100	HRI	17
MX1131	-86.8288	20.9163	2016	21	100	HRI	62
MX1131	-86.8288	20.9163	2016	26	100	HRI	38
MX1131	-86.8288	20.9163	2016	20	100	HRI	36
MX1131	-86.8288	20.9163	2016	35	100	HRI	29
MX1131	-86.8288	20.9163	2016	49	100	HRI	29
MX1131	-86.8288	20.9163	2016	57	100	HRI	17
MX1132	-86.7964	20.9873	2005	50.2	100	HRI	3
MX1132	-86.7964	20.9873	2005	17	100	HRI	31
MX1132	-86.7964	20.9873	2005	4	100	HRI	36
MX1132	-86.7964	20.9873	2005	7.3	100	HRI	40
MX1132	-86.7964	20.9873	2009	19.4	100	HRI	14
MX1132	-86.7964	20.9873	2009	14	100	HRI	34
MX1132	-86.7964	20.9873	2009	4.8	100	HRI	42
MX1132	-86.7964	20.9873	2009	18.1	100	HRI	21
MX1132	-86.7964	20.9873	2009	13	100	HRI	41
MX1132	-86.7964	20.9873	2009	12.4	100	HRI	32
MX1132	-86.7964	20.9873	2012	76	100	HRI	1
MX1132	-86.7964	20.9873	2012	55	100	HRI	7
MX1132	-86.7964	20.9873	2012	29	100	HRI	15
MX1132	-86.7964	20.9873	2012	11	100	HRI	17
MX1132	-86.7964	20.9873	2012	29	100	HRI	12
MX1132	-86.7964	20.9873	2012	23	100	HRI	6
MX1132	-86.7964	20.9873	2014	25	100	HRI	22
MX1132	-86.7964	20.9873	2014	22	100	HRI	42
MX1132	-86.7964	20.9873	2014	17	100	HRI	45
MX1132	-86.7964	20.9873	2014	2	100	HRI	35
MX1132	-86.7964	20.9873	2014	4	100	HRI	24
MX1132	-86.7964	20.9873	2014	4	100	HRI	32
MX1132	-86.7964	20.9873	2016	79	100	HRI	4
MX1132	-86.7964	20.9873	2016	33	100	HRI	14
MX1132	-86.7964	20.9873	2016	21	100	HRI	24
MX1132	-86.7964	20.9873	2016	39	100	HRI	9
MX1132	-86.7964	20.9873	2016	24	100	HRI	18
MX1132	-86.7964	20.9873	2016	82	100	HRI	0
MX1133	-86.7405	21.1334	2005	1.8	100	HRI	4
MX1133	-86.7405	21.1334	2005	0	100	HRI	7
MX1133	-86.7405	21.1334	2005	0	100	HRI	7
MX1133	-86.7405	21.1334	2005	1.3	100	HRI	7
MX1133	-86.7405	21.1334	2009	0	100	HRI	37
MX1133	-86.7405	21.1334	2009	6.6	100	HRI	46
MX1133	-86.7405	21.1334	2009	3.2	100	HRI	32
MX1133	-86.7405	21.1334	2009	3.8	100	HRI	36
MX1133	-86.7405	21.1334	2009	4.1	100	HRI	0
MX1133	-86.7405	21.1334	2011	0	100	HRI	27
MX1133	-86.7405	21.1334	2011	0	100	HRI	28
MX1133	-86.7405	21.1334	2011	0	100	HRI	28
MX1133	-86.7405	21.1334	2011	3	100	HRI	19
MX1133	-86.7405	21.1334	2011	1	100	HRI	20
MX1133	-86.7405	21.1334	2011	0	100	HRI	18
MX1133	-86.7405	21.1334	2014	4	100	HRI	36
MX1133	-86.7405	21.1334	2014	4	100	HRI	49
MX1133	-86.7405	21.1334	2014	0	100	HRI	49
MX1133	-86.7405	21.1334	2014	5	100	HRI	54
MX1133	-86.7405	21.1334	2014	3	100	HRI	52
MX1133	-86.7405	21.1334	2014	1	100	HRI	48
MX1133	-86.7405	21.1334	2016	0	100	HRI	7
MX1133	-86.7405	21.1334	2016	9	100	HRI	43
MX1133	-86.7405	21.1334	2016	0	100	HRI	40
MX1133	-86.7405	21.1334	2016	1	100	HRI	30
MX1133	-86.7405	21.1334	2016	0	100	HRI	10
MX1133	-86.7405	21.1334	2016	1	100	HRI	38
MX1136	-87.7984	18.3497	2006	5.5	100	HRI	2
MX1136	-87.7984	18.3497	2006	2.5	100	HRI	4
MX1136	-87.7984	18.3497	2006	0.7	100	HRI	7
MX1136	-87.7984	18.3497	2006	3.3	100	HRI	6
MX1136	-87.7984	18.3497	2009	14.7	100	HRI	20
MX1136	-87.7984	18.3497	2009	13.1	100	HRI	15
MX1136	-87.7984	18.3497	2009	8.3	100	HRI	6
MX1136	-87.7984	18.3497	2009	10.8	100	HRI	29
MX1136	-87.7984	18.3497	2009	1.9	100	HRI	14
MX1136	-87.7984	18.3497	2009	11.5	100	HRI	26
MX1136	-87.7984	18.3497	2014	2	100	HRI	44
MX1136	-87.7984	18.3497	2014	3	100	HRI	29
MX1136	-87.7984	18.3497	2014	2	100	HRI	44
MX1136	-87.7984	18.3497	2014	14	100	HRI	39
MX1136	-87.7984	18.3497	2014	5	100	HRI	37
MX1136	-87.7984	18.3497	2014	2	100	HRI	33
MX1136	-87.7984	18.3497	2016	5	100	HRI	32
MX1136	-87.7984	18.3497	2016	5	100	HRI	34
MX1136	-87.7984	18.3497	2016	9	100	HRI	35
MX1136	-87.7984	18.3497	2016	12	100	HRI	42
MX1136	-87.7984	18.3497	2016	2	100	HRI	50
MX1136	-87.7984	18.3497	2016	3	100	HRI	33
MX2067	-87.767	18.4002	2006	9.4	100	HRI	35
MX2067	-87.767	18.4002	2006	5.9	100	HRI	17
MX2067	-87.767	18.4002	2006	9.6	100	HRI	14
MX2067	-87.767	18.4002	2006	2.2	100	HRI	6
MX2067	-87.767	18.4002	2009	25.2	100	HRI	26
MX2067	-87.767	18.4002	2009	18.8	100	HRI	39
MX2067	-87.767	18.4002	2009	19.3	100	HRI	23
MX2067	-87.767	18.4002	2009	24.9	100	HRI	25
MX2067	-87.767	18.4002	2009	15.3	100	HRI	23
MX2067	-87.767	18.4002	2009	15.5	100	HRI	16
MX2067	-87.767	18.4002	2012	6	100	HRI	8
MX2067	-87.767	18.4002	2012	18	100	HRI	18
MX2067	-87.767	18.4002	2012	24	100	HRI	16
MX2067	-87.767	18.4002	2012	7	100	HRI	14
MX2067	-87.767	18.4002	2012	18	100	HRI	6
MX2067	-87.767	18.4002	2012	11	100	HRI	22
MX2067	-87.767	18.4002	2014	5	100	HRI	27
MX2067	-87.767	18.4002	2014	5	100	HRI	33
MX2067	-87.767	18.4002	2014	14	100	HRI	22
MX2067	-87.767	18.4002	2014	13	100	HRI	21
MX2067	-87.767	18.4002	2014	8	100	HRI	16
MX2067	-87.767	18.4002	2014	10	100	HRI	15
MX2067	-87.767	18.4002	2016	25	100	HRI	38
MX2067	-87.767	18.4002	2016	42	100	HRI	24
MX2067	-87.767	18.4002	2016	15	100	HRI	55
MX2067	-87.767	18.4002	2016	13	100	HRI	59
MX2067	-87.767	18.4002	2016	10	100	HRI	54
MX2067	-87.767	18.4002	2016	36	100	HRI	29
MX3009	-86.9999	20.2723	2005	7.7	100	HRI	6
MX3009	-86.9999	20.2723	2005	9.5	100	HRI	4
MX3009	-86.9999	20.2723	2005	15.1	100	HRI	5
MX3009	-86.9999	20.2723	2009	7.1	100	HRI	49
MX3009	-86.9999	20.2723	2009	4	100	HRI	38
MX3009	-86.9999	20.2723	2009	6.2	100	HRI	52
MX3009	-86.9999	20.2723	2009	7.2	100	HRI	34
MX3009	-86.9999	20.2723	2011	8	100	HRI	34
MX3009	-86.9999	20.2723	2011	12	100	HRI	46
MX3009	-86.9999	20.2723	2011	13	100	HRI	43
MX3009	-86.9999	20.2723	2011	10	100	HRI	45
MX3009	-86.9999	20.2723	2011	11	100	HRI	37
MX3009	-86.9999	20.2723	2011	9	100	HRI	38
MX3009	-86.9999	20.2723	2014	32	100	HRI	47
MX3009	-86.9999	20.2723	2014	10	100	HRI	46
MX3009	-86.9999	20.2723	2014	10	100	HRI	45
MX3009	-86.9999	20.2723	2014	7	100	HRI	52
MX3009	-86.9999	20.2723	2014	15	100	HRI	54
MX3009	-86.9999	20.2723	2014	18	100	HRI	52
MX3009	-86.9999	20.2723	2016	10	100	HRI	64
MX3009	-86.9999	20.2723	2016	10	100	HRI	60
MX3009	-86.9999	20.2723	2016	15	100	HRI	29
MX3009	-86.9999	20.2723	2016	17	100	HRI	41
MX3009	-86.9999	20.2723	2016	27	100	HRI	51
MX3009	-86.9999	20.2723	2016	11	100	HRI	60
MX3054	-86.7526	20.5112	2005	19.9	100	HRI	14
MX3054	-86.7526	20.5112	2005	6.1	100	HRI	43
MX3054	-86.7526	20.5112	2005	14.7	100	HRI	17
MX3054	-86.7526	20.5112	2005	6.1	100	HRI	25
MX3054	-86.7526	20.5112	2016	14	100	CONACYT.247104	45
MX3054	-86.7526	20.5112	2016	8	100	CONACYT.247104	52
MX3054	-86.7526	20.5112	2016	20	100	CONACYT.247104	49
MX3054	-86.7526	20.5112	2016	11	100	CONACYT.247104	33
MX3054	-86.7526	20.5112	2016	13	100	CONACYT.247104	60
MX3054	-86.7526	20.5112	2016	7	100	CONACYT.247104	41
MX3054	-86.7526	20.5112	2015	28.3333	100	PROMOBI.PNAC	9
MX3054	-86.7526	20.5112	2015	18.3333	100	PROMOBI.PNAC	37
MX3054	-86.7526	20.5112	2015	29.1667	100	PROMOBI.PNAC	15
MXXCK01	-87.8274	18.2137	2012	17	100	HRI	13
MXXCK01	-87.8274	18.2137	2012	18	100	HRI	30
MXXCK01	-87.8274	18.2137	2012	11	100	HRI	30
MXXCK01	-87.8274	18.2137	2012	22	100	HRI	18
MXXCK01	-87.8274	18.2137	2012	27	100	HRI	19
MXXCK01	-87.8274	18.2137	2012	9	100	HRI	55
MXXCK01	-87.8274	18.2137	2014	15	100	HRI	39
MXXCK01	-87.8274	18.2137	2014	9	100	HRI	49
MXXCK01	-87.8274	18.2137	2014	11	100	HRI	41
MXXCK01	-87.8274	18.2137	2014	22	100	HRI	29
MXXCK01	-87.8274	18.2137	2014	22	100	HRI	24
MXXCK01	-87.8274	18.2137	2014	13	100	HRI	46
MXXCK01	-87.8274	18.2137	2016	11	100	HRI	55
MXXCK01	-87.8274	18.2137	2016	22	100	HRI	43
MXXCK01	-87.8274	18.2137	2016	24	100	HRI	34
MXXCK01	-87.8274	18.2137	2016	30	100	HRI	39
MXXCK01	-87.8274	18.2137	2016	32	100	HRI	50
MXXCK01	-87.8274	18.2137	2016	19	100	HRI	55
MXXCK02	-87.8262	18.2401	2012	19	100	HRI	5
MXXCK02	-87.8262	18.2401	2012	17	100	HRI	6
MXXCK02	-87.8262	18.2401	2012	15	100	HRI	18
MXXCK02	-87.8262	18.2401	2012	38	100	HRI	10
MXXCK02	-87.8262	18.2401	2012	23	100	HRI	16
MXXCK02	-87.8262	18.2401	2012	13	100	HRI	18
MXXCK02	-87.8262	18.2401	2014	12	100	HRI	40
MXXCK02	-87.8262	18.2401	2014	9	100	HRI	34
MXXCK02	-87.8262	18.2401	2014	17	100	HRI	26
MXXCK02	-87.8262	18.2401	2014	23	100	HRI	18
MXXCK02	-87.8262	18.2401	2014	19	100	HRI	22
MXXCK02	-87.8262	18.2401	2014	7	100	HRI	48
MXXCK02	-87.8262	18.2401	2016	18	100	HRI	45
MXXCK02	-87.8262	18.2401	2016	14	100	HRI	37
MXXCK02	-87.8262	18.2401	2016	15	100	HRI	40
MXXCK02	-87.8262	18.2401	2016	9	100	HRI	35
MXXCK02	-87.8262	18.2401	2016	27	100	HRI	16
MXXCK02	-87.8262	18.2401	2016	34	100	HRI	28
PalancarJardinesMERASomero	-87.0262	20.3318	2009	10	100	MERA.PNAC	16
PalancarJardinesMERASomero	-87.0262	20.3318	2009	14.1667	100	MERA.PNAC	9
PalancarJardinesMERASomero	-87.0262	20.3318	2009	17.5	100	MERA.PNAC	14
PalancarJardinesMERASomero	-87.0262	20.3318	2009	10.8333	100	MERA.PNAC	20
PalancarJardinesMERASomero	-87.0262	20.3318	2009	8.33333	100	MERA.PNAC	14
PalancarJardinesMERASomero	-87.0262	20.3318	2009	10	100	MERA.PNAC	33
PalancarJardinesMERASomero	-87.0262	20.3318	2011	16.6667	100	MERA.PNAC	25
PalancarJardinesMERASomero	-87.0262	20.3318	2011	8.33333	100	MERA.PNAC	27.5
PalancarJardinesMERASomero	-87.0262	20.3318	2011	30	100	MERA.PNAC	27.5
PalancarJardinesMERASomero	-87.0262	20.3318	2011	21.6667	100	MERA.PNAC	22.5
PalancarJardinesMERASomero	-87.0262	20.3318	2011	34.1667	100	MERA.PNAC	22
PalancarJardinesMERASomero	-87.0262	20.3318	2011	16.6667	100	MERA.PNAC	33
PalancarJardinesMERASomero	-87.0262	20.3318	2014	5.83333	100	MERA.PNAC	22.5
PalancarJardinesMERASomero	-87.0262	20.3318	2014	9.16667	100	MERA.PNAC	37
PalancarJardinesMERASomero	-87.0262	20.3318	2014	33.3333	100	MERA.PNAC	13
PalancarJardinesMERASomero	-87.0262	20.3318	2014	23.3333	100	MERA.PNAC	13
PalancarJardinesMERASomero	-87.0262	20.3318	2014	35	100	MERA.PNAC	23
PalancarJardinesMERASomero	-87.0262	20.3318	2014	36.6667	100	MERA.PNAC	31
Paraiso	-86.983	20.4693	2005	30.8333	100	Monitoreo.PNAC	14
Paraiso	-86.983	20.4693	2005	24.1667	100	Monitoreo.PNAC	17
Paraiso	-86.983	20.4693	2005	32.5	100	Monitoreo.PNAC	18
Paraiso	-86.983	20.4693	2005	16.6667	100	Monitoreo.PNAC	20
Paraiso	-86.983	20.4693	2005	27.5	100	Monitoreo.PNAC	11
Paraiso	-86.983	20.4693	2005	25	100	Monitoreo.PNAC	17
Paraiso	-86.983	20.4693	2005	19.1667	100	Monitoreo.PNAC	16
Paraiso	-86.983	20.4693	2005	12.5	100	Monitoreo.PNAC	30
Paraiso	-86.983	20.4693	2005	8.33333	100	Monitoreo.PNAC	4
Paraiso	-86.983	20.4693	2005	2.5	100	Monitoreo.PNAC	6
Paraiso	-86.983	20.4693	2005	15.8333	100	Monitoreo.PNAC	8
Paraiso	-86.983	20.4693	2005	11.6667	100	Monitoreo.PNAC	18
Paraiso	-86.983	20.4693	2005	15.8333	100	Monitoreo.PNAC	3
Paraiso	-86.983	20.4693	2005	11.6667	100	Monitoreo.PNAC	6
Paraiso	-86.983	20.4693	2005	5.83333	100	Monitoreo.PNAC	3
Paraiso	-86.983	20.4693	2005	6.66667	100	Monitoreo.PNAC	0
Paraiso	-86.983	20.4693	2005	8.33333	100	Monitoreo.PNAC	1
Paraiso	-86.983	20.4693	2005	10	100	Monitoreo.PNAC	3
Paraiso	-86.983	20.4693	2006	7.5	100	Monitoreo.PNAC	1
Paraiso	-86.983	20.4693	2006	18.3333	100	Monitoreo.PNAC	0
Paraiso	-86.983	20.4693	2006	5.83333	100	Monitoreo.PNAC	0
Paraiso	-86.983	20.4693	2006	1.66667	100	Monitoreo.PNAC	0
Paraiso	-86.983	20.4693	2006	15.8333	100	Monitoreo.PNAC	2
Paraiso	-86.983	20.4693	2006	6.66667	100	Monitoreo.PNAC	0
Paraiso	-86.983	20.4693	2006	13.3333	100	Monitoreo.PNAC	4
Paraiso	-86.983	20.4693	2006	14.1667	100	Monitoreo.PNAC	9
Paraiso	-86.983	20.4693	2006	25.8333	100	Monitoreo.PNAC	2
Paraiso	-86.983	20.4693	2006	16.6667	100	Monitoreo.PNAC	3
Paraiso	-86.983	20.4693	2006	15.8333	100	Monitoreo.PNAC	3
Paraiso	-86.983	20.4693	2006	15	100	Monitoreo.PNAC	3
Paraiso	-86.983	20.4693	2007	15	100	Monitoreo.PNAC	2
Paraiso	-86.983	20.4693	2007	11.6667	100	Monitoreo.PNAC	1
Paraiso	-86.983	20.4693	2007	8.33333	100	Monitoreo.PNAC	2
Paraiso	-86.983	20.4693	2007	5	100	Monitoreo.PNAC	2
Paraiso	-86.983	20.4693	2007	15.8333	100	Monitoreo.PNAC	3
Paraiso	-86.983	20.4693	2007	8.33333	100	Monitoreo.PNAC	0
Paraiso	-86.983	20.4693	2007	11.6667	100	Monitoreo.PNAC	0
Paraiso	-86.983	20.4693	2007	11.6667	100	Monitoreo.PNAC	8
Paraiso	-86.983	20.4693	2007	8.33333	100	Monitoreo.PNAC	2
Paraiso	-86.983	20.4693	2007	11.6667	100	Monitoreo.PNAC	0
Paraiso	-86.983	20.4693	2007	13.3333	100	Monitoreo.PNAC	3
Paraiso	-86.983	20.4693	2007	12.5	100	Monitoreo.PNAC	2
Paraiso	-86.983	20.4693	2008	9.16667	100	Monitoreo.PNAC	3
Paraiso	-86.983	20.4693	2008	13.3333	100	Monitoreo.PNAC	11
Paraiso	-86.983	20.4693	2008	9.16667	100	Monitoreo.PNAC	3
Paraiso	-86.983	20.4693	2008	19.1667	100	Monitoreo.PNAC	10
Paraiso	-86.983	20.4693	2008	23.3333	100	Monitoreo.PNAC	9
Paraiso	-86.983	20.4693	2008	5	100	Monitoreo.PNAC	8
Paraiso	-86.983	20.4693	2008	6.66667	100	Monitoreo.PNAC	3
Paraiso	-86.983	20.4693	2008	7.5	100	Monitoreo.PNAC	6
Paraiso	-86.983	20.4693	2008	12.5	100	Monitoreo.PNAC	7
Paraiso	-86.983	20.4693	2008	5	100	Monitoreo.PNAC	2
Paraiso	-86.983	20.4693	2008	7.5	100	Monitoreo.PNAC	3
Paraiso	-86.983	20.4693	2008	7.5	100	Monitoreo.PNAC	0
Paraiso	-86.983	20.4693	2009	6.66667	100	MERA.PNAC	1
Paraiso	-86.983	20.4693	2009	5.83333	100	MERA.PNAC	1
Paraiso	-86.983	20.4693	2009	8.33333	100	MERA.PNAC	0
Paraiso	-86.983	20.4693	2009	4.16667	100	MERA.PNAC	1
Paraiso	-86.983	20.4693	2009	7.5	100	MERA.PNAC	4
Paraiso	-86.983	20.4693	2009	7.5	100	MERA.PNAC	3
Paraiso	-86.983	20.4693	2009	9.16667	100	Monitoreo.PNAC	3
Paraiso	-86.983	20.4693	2009	10.8333	100	Monitoreo.PNAC	7
Paraiso	-86.983	20.4693	2009	6.66667	100	Monitoreo.PNAC	2
Paraiso	-86.983	20.4693	2009	5	100	Monitoreo.PNAC	2
Paraiso	-86.983	20.4693	2009	10.8333	100	Monitoreo.PNAC	3
Paraiso	-86.983	20.4693	2009	4.16667	100	Monitoreo.PNAC	2
Paraiso	-86.983	20.4693	2010	8.33333	100	Monitoreo.PNAC	4
Paraiso	-86.983	20.4693	2010	3.33333	100	Monitoreo.PNAC	7
Paraiso	-86.983	20.4693	2010	8.33333	100	Monitoreo.PNAC	1
Paraiso	-86.983	20.4693	2010	7.5	100	Monitoreo.PNAC	3
Paraiso	-86.983	20.4693	2010	4.16667	100	Monitoreo.PNAC	3
Paraiso	-86.983	20.4693	2010	3.33333	100	Monitoreo.PNAC	3
Paraiso	-86.983	20.4693	2010	13.3333	100	Monitoreo.PNAC	3
Paraiso	-86.983	20.4693	2010	12.5	100	Monitoreo.PNAC	8
Paraiso	-86.983	20.4693	2010	15.8333	100	Monitoreo.PNAC	4
Paraiso	-86.983	20.4693	2010	10	100	Monitoreo.PNAC	7
Paraiso	-86.983	20.4693	2010	15.8333	100	Monitoreo.PNAC	4
Paraiso	-86.983	20.4693	2010	9.16667	100	Monitoreo.PNAC	4
Paraiso	-86.983	20.4693	2011	4.16667	100	MERA.PNAC	5
Paraiso	-86.983	20.4693	2011	7.5	100	MERA.PNAC	6
Paraiso	-86.983	20.4693	2011	11.6667	100	MERA.PNAC	8
Paraiso	-86.983	20.4693	2011	22.5	100	MERA.PNAC	8
Paraiso	-86.983	20.4693	2011	12.5	100	MERA.PNAC	3
Paraiso	-86.983	20.4693	2011	10.8333	100	MERA.PNAC	3
Paraiso	-86.983	20.4693	2011	15.8333	100	PROMOBI.PNAC	12
Paraiso	-86.983	20.4693	2011	11.6667	100	PROMOBI.PNAC	8
Paraiso	-86.983	20.4693	2011	2.5	100	PROMOBI.PNAC	8
Paraiso	-86.983	20.4693	2011	7.5	100	PROMOBI.PNAC	3
Paraiso	-86.983	20.4693	2011	13.3333	100	PROMOBI.PNAC	18
Paraiso	-86.983	20.4693	2011	3.33333	100	PROMOBI.PNAC	5
Paraiso	-86.983	20.4693	2012	16.6667	100	PROMOBI.PNAC	1
Paraiso	-86.983	20.4693	2012	25.8333	100	PROMOBI.PNAC	0
Paraiso	-86.983	20.4693	2012	24.1667	100	PROMOBI.PNAC	2
Paraiso	-86.983	20.4693	2012	13.3333	100	PROMOBI.PNAC	3
Paraiso	-86.983	20.4693	2012	23.3333	100	PROMOBI.PNAC	12
Paraiso	-86.983	20.4693	2012	32.5	100	PROMOBI.PNAC	2
Paraiso	-86.983	20.4693	2012	17.5	100	PROMOBI.PNAC	6
Paraiso	-86.983	20.4693	2012	15	100	PROMOBI.PNAC	3
Paraiso	-86.983	20.4693	2012	15	100	PROMOBI.PNAC	8
Paraiso	-86.983	20.4693	2012	18.3333	100	PROMOBI.PNAC	1
Paraiso	-86.983	20.4693	2012	24.1667	100	PROMOBI.PNAC	3
Paraiso	-86.983	20.4693	2012	32.5	100	PROMOBI.PNAC	2
Paraiso	-86.983	20.4693	2013	32.5	100	PROMOBI.PNAC	14
Paraiso	-86.983	20.4693	2013	20	100	PROMOBI.PNAC	3
Paraiso	-86.983	20.4693	2013	30.8333	100	PROMOBI.PNAC	13
Paraiso	-86.983	20.4693	2013	19.1667	100	PROMOBI.PNAC	1
Paraiso	-86.983	20.4693	2013	14.1667	100	PROMOBI.PNAC	0
Paraiso	-86.983	20.4693	2013	18.3333	100	PROMOBI.PNAC	7
Paraiso	-86.983	20.4693	2013	25	100	PROMOBI.PNAC	11
Paraiso	-86.983	20.4693	2013	18.3333	100	PROMOBI.PNAC	13
Paraiso	-86.983	20.4693	2013	32.5	100	PROMOBI.PNAC	4
Paraiso	-86.983	20.4693	2013	23.3333	100	PROMOBI.PNAC	3
Paraiso	-86.983	20.4693	2013	39.1667	100	PROMOBI.PNAC	3
Paraiso	-86.983	20.4693	2013	32.5	100	PROMOBI.PNAC	2
Paraiso	-86.983	20.4693	2014	0.833333	100	MERA.PNAC	4
Paraiso	-86.983	20.4693	2014	2.5	100	MERA.PNAC	20
Paraiso	-86.983	20.4693	2014	7.43802	100	MERA.PNAC	4
Paraiso	-86.983	20.4693	2014	5	100	MERA.PNAC	18
Paraiso	-86.983	20.4693	2014	6.72269	100	MERA.PNAC	15
Paraiso	-86.983	20.4693	2014	2.5	100	MERA.PNAC	14
Paraiso	-86.983	20.4693	2014	13.3333	100	PROMOBI.PNAC	3
Paraiso	-86.983	20.4693	2014	23.3333	100	PROMOBI.PNAC	0
Paraiso	-86.983	20.4693	2014	18.3333	100	PROMOBI.PNAC	5
Paraiso	-86.983	20.4693	2014	20.8333	100	PROMOBI.PNAC	6
Paraiso	-86.983	20.4693	2014	30	100	PROMOBI.PNAC	7
Paraiso	-86.983	20.4693	2014	29.1667	100	PROMOBI.PNAC	3
Paraiso	-86.983	20.4693	2014	30.8333	100	PROMOBI.PNAC	1
Paraiso	-86.983	20.4693	2014	13.3333	100	PROMOBI.PNAC	3
Paraiso	-86.983	20.4693	2014	17.5	100	PROMOBI.PNAC	2
Paraiso	-86.983	20.4693	2014	38.3333	100	PROMOBI.PNAC	1
Paraiso	-86.983	20.4693	2014	27.5	100	PROMOBI.PNAC	0
Paraiso	-86.983	20.4693	2014	23.3333	100	PROMOBI.PNAC	0
Paraiso	-86.983	20.4693	2015	13.3333	100	PROMOBI.PNAC	3
Paraiso	-86.983	20.4693	2015	12.5	100	PROMOBI.PNAC	5
Paraiso	-86.983	20.4693	2015	13.3333	100	PROMOBI.PNAC	0
Paraiso	-86.983	20.4693	2015	11.6667	100	PROMOBI.PNAC	3
Paraiso	-86.983	20.4693	2015	11.6667	100	PROMOBI.PNAC	1
Paraiso	-86.983	20.4693	2015	10.8333	100	PROMOBI.PNAC	14
Paraiso	-86.983	20.4693	2016	7	100	CONACYT.247104	7
Paraiso	-86.983	20.4693	2016	9	100	CONACYT.247104	6
Paraiso	-86.983	20.4693	2016	27	100	CONACYT.247104	16
Paraiso	-86.983	20.4693	2016	19	100	CONACYT.247104	5
Paraiso	-86.983	20.4693	2016	8	100	CONACYT.247104	6
Paraiso	-86.983	20.4693	2016	14	100	CONACYT.247104	3
ParaisoMERASomero	-86.9815	20.4694	2009	3.33333	100	MERA.PNAC	33
ParaisoMERASomero	-86.9815	20.4694	2009	2.5	100	MERA.PNAC	44
ParaisoMERASomero	-86.9815	20.4694	2009	7.5	100	MERA.PNAC	9
ParaisoMERASomero	-86.9815	20.4694	2009	3.33333	100	MERA.PNAC	38
ParaisoMERASomero	-86.9815	20.4694	2009	5	100	MERA.PNAC	8
ParaisoMERASomero	-86.9815	20.4694	2009	5	100	MERA.PNAC	54
ParaisoMERASomero	-86.9815	20.4694	2011	6.66667	100	MERA.PNAC	5
ParaisoMERASomero	-86.9815	20.4694	2011	6.66667	100	MERA.PNAC	1
ParaisoMERASomero	-86.9815	20.4694	2011	7.5	100	MERA.PNAC	4
ParaisoMERASomero	-86.9815	20.4694	2011	6.66667	100	MERA.PNAC	3
ParaisoMERASomero	-86.9815	20.4694	2011	10.8333	100	MERA.PNAC	2
ParaisoMERASomero	-86.9815	20.4694	2011	13.3333	100	MERA.PNAC	4
ParaisoMERASomero	-86.9815	20.4694	2014	3.33333	100	MERA.PNAC	78
ParaisoMERASomero	-86.9815	20.4694	2014	0.833333	100	MERA.PNAC	83
ParaisoMERASomero	-86.9815	20.4694	2014	2.5	100	MERA.PNAC	85
ParaisoMERASomero	-86.9815	20.4694	2014	5.83333	100	MERA.PNAC	76
ParaisoMERASomero	-86.9815	20.4694	2014	1.66667	100	MERA.PNAC	92
ParaisoMERASomero	-86.9815	20.4694	2014	2.5	100	MERA.PNAC	86
PasodelCedral	-87.0289	20.3739	2005	38.3333	100	Monitoreo.PNAC	13
PasodelCedral	-87.0289	20.3739	2005	27.5	100	Monitoreo.PNAC	21
PasodelCedral	-87.0289	20.3739	2005	25.8333	100	Monitoreo.PNAC	13
PasodelCedral	-87.0289	20.3739	2005	42.5	100	Monitoreo.PNAC	12
PasodelCedral	-87.0289	20.3739	2005	25	100	Monitoreo.PNAC	15
PasodelCedral	-87.0289	20.3739	2005	30	100	Monitoreo.PNAC	14
PasodelCedral	-87.0289	20.3739	2005	20.8333	100	Monitoreo.PNAC	18
PasodelCedral	-87.0289	20.3739	2005	23.3333	100	Monitoreo.PNAC	17
PasodelCedral	-87.0289	20.3739	2005	25	100	Monitoreo.PNAC	9
PasodelCedral	-87.0289	20.3739	2005	15.8333	100	Monitoreo.PNAC	17
PasodelCedral	-87.0289	20.3739	2005	20	100	Monitoreo.PNAC	17
PasodelCedral	-87.0289	20.3739	2005	13.3333	100	Monitoreo.PNAC	13
PasodelCedral	-87.0289	20.3739	2005	18.3333	100	Monitoreo.PNAC	5
PasodelCedral	-87.0289	20.3739	2005	8.33333	100	Monitoreo.PNAC	10
PasodelCedral	-87.0289	20.3739	2005	10	100	Monitoreo.PNAC	4
PasodelCedral	-87.0289	20.3739	2005	5	100	Monitoreo.PNAC	2
PasodelCedral	-87.0289	20.3739	2005	10.8333	100	Monitoreo.PNAC	4
PasodelCedral	-87.0289	20.3739	2005	10.8333	100	Monitoreo.PNAC	5
PasodelCedral	-87.0289	20.3739	2006	18.3333	100	Monitoreo.PNAC	3
PasodelCedral	-87.0289	20.3739	2006	13.3333	100	Monitoreo.PNAC	3
PasodelCedral	-87.0289	20.3739	2006	16.6667	100	Monitoreo.PNAC	3
PasodelCedral	-87.0289	20.3739	2006	13.3333	100	Monitoreo.PNAC	1
PasodelCedral	-87.0289	20.3739	2006	10.8333	100	Monitoreo.PNAC	3
PasodelCedral	-87.0289	20.3739	2006	12.5	100	Monitoreo.PNAC	3
PasodelCedral	-87.0289	20.3739	2006	20.8333	100	Monitoreo.PNAC	4
PasodelCedral	-87.0289	20.3739	2006	18.3333	100	Monitoreo.PNAC	10
PasodelCedral	-87.0289	20.3739	2006	19.1667	100	Monitoreo.PNAC	3
PasodelCedral	-87.0289	20.3739	2006	9.16667	100	Monitoreo.PNAC	3
PasodelCedral	-87.0289	20.3739	2006	14.1667	100	Monitoreo.PNAC	4
PasodelCedral	-87.0289	20.3739	2006	7.5	100	Monitoreo.PNAC	3
PasodelCedral	-87.0289	20.3739	2007	23.3333	100	Monitoreo.PNAC	3
PasodelCedral	-87.0289	20.3739	2007	21.6667	100	Monitoreo.PNAC	7
PasodelCedral	-87.0289	20.3739	2007	13.3333	100	Monitoreo.PNAC	9
PasodelCedral	-87.0289	20.3739	2007	16.6667	100	Monitoreo.PNAC	4
PasodelCedral	-87.0289	20.3739	2007	16.6667	100	Monitoreo.PNAC	10
PasodelCedral	-87.0289	20.3739	2007	17.5	100	Monitoreo.PNAC	5
PasodelCedral	-87.0289	20.3739	2007	5	100	Monitoreo.PNAC	3
PasodelCedral	-87.0289	20.3739	2007	9.16667	100	Monitoreo.PNAC	1
PasodelCedral	-87.0289	20.3739	2007	20.8333	100	Monitoreo.PNAC	16
PasodelCedral	-87.0289	20.3739	2007	24.1667	100	Monitoreo.PNAC	17
PasodelCedral	-87.0289	20.3739	2007	25	100	Monitoreo.PNAC	13
PasodelCedral	-87.0289	20.3739	2007	17.5	100	Monitoreo.PNAC	18
PasodelCedral	-87.0289	20.3739	2008	15	100	Monitoreo.PNAC	4
PasodelCedral	-87.0289	20.3739	2008	14.1667	100	Monitoreo.PNAC	10
PasodelCedral	-87.0289	20.3739	2008	17.5	100	Monitoreo.PNAC	8
PasodelCedral	-87.0289	20.3739	2008	17.5	100	Monitoreo.PNAC	15
PasodelCedral	-87.0289	20.3739	2008	12.5	100	Monitoreo.PNAC	9
PasodelCedral	-87.0289	20.3739	2008	6.66667	100	Monitoreo.PNAC	9
PasodelCedral	-87.0289	20.3739	2008	10.8333	100	Monitoreo.PNAC	14
PasodelCedral	-87.0289	20.3739	2008	8.33333	100	Monitoreo.PNAC	16
PasodelCedral	-87.0289	20.3739	2008	13.3333	100	Monitoreo.PNAC	15
PasodelCedral	-87.0289	20.3739	2008	9.16667	100	Monitoreo.PNAC	18
PasodelCedral	-87.0289	20.3739	2008	7.5	100	Monitoreo.PNAC	15
PasodelCedral	-87.0289	20.3739	2008	5	100	Monitoreo.PNAC	14
PasodelCedral	-87.0289	20.3739	2009	8.33333	100	MERA.PNAC	21
PasodelCedral	-87.0289	20.3739	2009	7.5	100	MERA.PNAC	28
PasodelCedral	-87.0289	20.3739	2009	6.66667	100	MERA.PNAC	22
PasodelCedral	-87.0289	20.3739	2009	9.16667	100	MERA.PNAC	15
PasodelCedral	-87.0289	20.3739	2009	6.66667	100	MERA.PNAC	10
PasodelCedral	-87.0289	20.3739	2009	4.16667	100	MERA.PNAC	16
PasodelCedral	-87.0289	20.3739	2009	10	100	Monitoreo.PNAC	9
PasodelCedral	-87.0289	20.3739	2009	15.8333	100	Monitoreo.PNAC	8
PasodelCedral	-87.0289	20.3739	2009	5.83333	100	Monitoreo.PNAC	8
PasodelCedral	-87.0289	20.3739	2009	10.8333	100	Monitoreo.PNAC	11
PasodelCedral	-87.0289	20.3739	2009	14.1667	100	Monitoreo.PNAC	11
PasodelCedral	-87.0289	20.3739	2009	21.6667	100	Monitoreo.PNAC	6
PasodelCedral	-87.0289	20.3739	2009	7.5	100	Monitoreo.PNAC	14
PasodelCedral	-87.0289	20.3739	2009	11.6667	100	Monitoreo.PNAC	7
PasodelCedral	-87.0289	20.3739	2009	9.16667	100	Monitoreo.PNAC	8
PasodelCedral	-87.0289	20.3739	2009	6.66667	100	Monitoreo.PNAC	5
PasodelCedral	-87.0289	20.3739	2009	9.16667	100	Monitoreo.PNAC	12
PasodelCedral	-87.0289	20.3739	2009	13.3333	100	Monitoreo.PNAC	7
PasodelCedral	-87.0289	20.3739	2010	15	100	Monitoreo.PNAC	13
PasodelCedral	-87.0289	20.3739	2010	9.16667	100	Monitoreo.PNAC	11
PasodelCedral	-87.0289	20.3739	2010	5.83333	100	Monitoreo.PNAC	9
PasodelCedral	-87.0289	20.3739	2010	9.16667	100	Monitoreo.PNAC	13
PasodelCedral	-87.0289	20.3739	2010	5.83333	100	Monitoreo.PNAC	6
PasodelCedral	-87.0289	20.3739	2010	7.5	100	Monitoreo.PNAC	12
PasodelCedral	-87.0289	20.3739	2010	14.1667	100	Monitoreo.PNAC	15
PasodelCedral	-87.0289	20.3739	2010	20	100	Monitoreo.PNAC	10
PasodelCedral	-87.0289	20.3739	2010	22.5	100	Monitoreo.PNAC	17
PasodelCedral	-87.0289	20.3739	2010	16.6667	100	Monitoreo.PNAC	14
PasodelCedral	-87.0289	20.3739	2010	19.1667	100	Monitoreo.PNAC	19
PasodelCedral	-87.0289	20.3739	2010	10	100	Monitoreo.PNAC	30
PasodelCedral	-87.0289	20.3739	2011	7.5	100	MERA.PNAC	18
PasodelCedral	-87.0289	20.3739	2011	12.5	100	MERA.PNAC	12.5
PasodelCedral	-87.0289	20.3739	2011	21.6667	100	MERA.PNAC	29
PasodelCedral	-87.0289	20.3739	2011	13.3333	100	MERA.PNAC	24
PasodelCedral	-87.0289	20.3739	2011	19.1667	100	MERA.PNAC	35
PasodelCedral	-87.0289	20.3739	2011	7.5	100	MERA.PNAC	31
PasodelCedral	-87.0289	20.3739	2012	24.1667	100	PROMOBI.PNAC	4
PasodelCedral	-87.0289	20.3739	2012	29.1667	100	PROMOBI.PNAC	6
PasodelCedral	-87.0289	20.3739	2012	36.6667	100	PROMOBI.PNAC	17
PasodelCedral	-87.0289	20.3739	2012	40.8333	100	PROMOBI.PNAC	18
PasodelCedral	-87.0289	20.3739	2012	44.1667	100	PROMOBI.PNAC	16
PasodelCedral	-87.0289	20.3739	2012	45	100	PROMOBI.PNAC	16
PasodelCedral	-87.0289	20.3739	2012	17.5	100	PROMOBI.PNAC	8
PasodelCedral	-87.0289	20.3739	2012	23.3333	100	PROMOBI.PNAC	14
PasodelCedral	-87.0289	20.3739	2012	35.8333	100	PROMOBI.PNAC	10
PasodelCedral	-87.0289	20.3739	2012	23.3333	100	PROMOBI.PNAC	14
PasodelCedral	-87.0289	20.3739	2012	47.5	100	PROMOBI.PNAC	13
PasodelCedral	-87.0289	20.3739	2012	46.6667	100	PROMOBI.PNAC	16
PasodelCedral	-87.0289	20.3739	2013	34.1667	100	PROMOBI.PNAC	7
PasodelCedral	-87.0289	20.3739	2013	33.3333	100	PROMOBI.PNAC	17
PasodelCedral	-87.0289	20.3739	2013	35	100	PROMOBI.PNAC	9
PasodelCedral	-87.0289	20.3739	2013	30.8333	100	PROMOBI.PNAC	10
PasodelCedral	-87.0289	20.3739	2013	30	100	PROMOBI.PNAC	24
PasodelCedral	-87.0289	20.3739	2013	30	100	PROMOBI.PNAC	32
PasodelCedral	-87.0289	20.3739	2013	12.5	100	PROMOBI.PNAC	8
PasodelCedral	-87.0289	20.3739	2013	32.5	100	PROMOBI.PNAC	4
PasodelCedral	-87.0289	20.3739	2013	35	100	PROMOBI.PNAC	5
PasodelCedral	-87.0289	20.3739	2013	40	100	PROMOBI.PNAC	10
PasodelCedral	-87.0289	20.3739	2013	45.8333	100	PROMOBI.PNAC	6
PasodelCedral	-87.0289	20.3739	2013	35.8333	100	PROMOBI.PNAC	8
PasodelCedral	-87.0289	20.3739	2014	5.83333	100	MERA.PNAC	56
PasodelCedral	-87.0289	20.3739	2014	10	100	MERA.PNAC	42
PasodelCedral	-87.0289	20.3739	2014	16.6667	100	MERA.PNAC	16
PasodelCedral	-87.0289	20.3739	2014	25	100	MERA.PNAC	23
PasodelCedral	-87.0289	20.3739	2014	13.3333	100	MERA.PNAC	41
PasodelCedral	-87.0289	20.3739	2014	3.33333	100	MERA.PNAC	49
PasodelCedral	-87.0289	20.3739	2014	7.5	100	PROMOBI.PNAC	13
PasodelCedral	-87.0289	20.3739	2014	35	100	PROMOBI.PNAC	12
PasodelCedral	-87.0289	20.3739	2014	33.3333	100	PROMOBI.PNAC	7
PasodelCedral	-87.0289	20.3739	2014	37.5	100	PROMOBI.PNAC	19
PasodelCedral	-87.0289	20.3739	2014	30.8333	100	PROMOBI.PNAC	18
PasodelCedral	-87.0289	20.3739	2014	38.3333	100	PROMOBI.PNAC	17
PasodelCedral	-87.0289	20.3739	2014	53.012	100	PROMOBI.PNAC	1
PasodelCedral	-87.0289	20.3739	2014	29.1667	100	PROMOBI.PNAC	3
PasodelCedral	-87.0289	20.3739	2014	30.8333	100	PROMOBI.PNAC	4
PasodelCedral	-87.0289	20.3739	2014	30	100	PROMOBI.PNAC	6
PasodelCedral	-87.0289	20.3739	2014	32.5	100	PROMOBI.PNAC	6
PasodelCedral	-87.0289	20.3739	2014	34.1667	100	PROMOBI.PNAC	11
PasodelCedral	-87.0289	20.3739	2015	36.6667	100	PROMOBI.PNAC	13
PasodelCedral	-87.0289	20.3739	2015	40.8333	100	PROMOBI.PNAC	26
PasodelCedral	-87.0289	20.3739	2015	27.5	100	PROMOBI.PNAC	13
PasodelCedral	-87.0289	20.3739	2015	30	100	PROMOBI.PNAC	20
PasodelCedral	-87.0289	20.3739	2015	31.6667	100	PROMOBI.PNAC	13
PasodelCedral	-87.0289	20.3739	2015	26.6667	100	PROMOBI.PNAC	4
PasodelCedral	-87.0289	20.3739	2016	38	100	CONACYT.247104	21
PasodelCedral	-87.0289	20.3739	2016	16	100	CONACYT.247104	27
PasodelCedral	-87.0289	20.3739	2016	31	100	CONACYT.247104	18
PasodelCedral	-87.0289	20.3739	2016	17	100	CONACYT.247104	33
PasodelCedral	-87.0289	20.3739	2016	37	100	CONACYT.247104	17
PasodelCedral	-87.0289	20.3739	2016	40	100	CONACYT.247104	19
RadioPirata	-86.865	20.8536	2008	75	100	Monitoreo.PNAPM	13
RadioPirata	-86.865	20.8536	2008	57.5	100	Monitoreo.PNAPM	4
RadioPirata	-86.865	20.8536	2008	49.1667	100	Monitoreo.PNAPM	13
RadioPirata	-86.865	20.8536	2008	14.1667	100	Monitoreo.PNAPM	6
RadioPirata	-86.865	20.8536	2008	9.16667	100	Monitoreo.PNAPM	10
RadioPirata	-86.865	20.8536	2012	3.33333	100	PROMOBI.PNAPM	12
RadioPirata	-86.865	20.8536	2012	9.16667	100	PROMOBI.PNAPM	24
RadioPirata	-86.865	20.8536	2012	14.1667	100	PROMOBI.PNAPM	25
RadioPirata	-86.865	20.8536	2012	22.5	100	PROMOBI.PNAPM	28
RadioPirata	-86.865	20.8536	2012	15.8333	100	PROMOBI.PNAPM	9
RadioPirata	-86.865	20.8536	2013	5.83333	100	PROMOBI.PNAPM	4
RadioPirata	-86.865	20.8536	2013	10	100	PROMOBI.PNAPM	7
RadioPirata	-86.865	20.8536	2013	13.3333	100	PROMOBI.PNAPM	14
RadioPirata	-86.865	20.8536	2013	6.66667	100	PROMOBI.PNAPM	10
RadioPirata	-86.865	20.8536	2013	20.8333	100	PROMOBI.PNAPM	20
RadioPirata	-86.865	20.8536	2014	3.33333	100	PROMOBI.PNAPM	3
RadioPirata	-86.865	20.8536	2014	5	100	PROMOBI.PNAPM	8
RadioPirata	-86.865	20.8536	2014	24.1667	100	PROMOBI.PNAPM	23
RadioPirata	-86.865	20.8536	2014	2.5	100	PROMOBI.PNAPM	11
RadioPirata	-86.865	20.8536	2014	16.6667	100	PROMOBI.PNAPM	8
RadioPirata	-86.865	20.8536	2015	7.5	100	PROMOBI.PNAPM	23
RadioPirata	-86.865	20.8536	2015	15.8333	100	PROMOBI.PNAPM	13
RadioPirata	-86.865	20.8536	2015	9.16667	100	PROMOBI.PNAPM	30
RadioPirata	-86.865	20.8536	2015	20	100	PROMOBI.PNAPM	5
RadioPirata	-86.865	20.8536	2015	20	100	PROMOBI.PNAPM	11
RadioPirata	-86.865	20.8536	2016	9	100	Monitoreo.PNAPM	7
RadioPirata	-86.865	20.8536	2016	12	100	Monitoreo.PNAPM	9
RadioPirata	-86.865	20.8536	2016	28	100	Monitoreo.PNAPM	10
RadioPirata	-86.865	20.8536	2016	21	100	Monitoreo.PNAPM	18
RadioPirata	-86.865	20.8536	2016	24	100	Monitoreo.PNAPM	3
RadioPirata	-86.865	20.8536	2016	31	100	Monitoreo.PNAPM	4
RadioPirata	-86.865	20.8536	2016	1	100	Monitoreo.PNAPM	32
RadioPirata	-86.865	20.8536	2016	2	100	Monitoreo.PNAPM	23
SanClemente	-87.022	20.4084	2016	16	100	Greenpeace.2016	3
SanClemente	-87.022	20.4084	2016	2	100	Greenpeace.2016	3
SanClemente	-87.022	20.4084	2016	6	100	Greenpeace.2016	15
SanClemente	-87.022	20.4084	2016	4	100	Greenpeace.2016	22
SanClemente	-87.022	20.4084	2016	14	100	Greenpeace.2016	8
SanClemente	-87.022	20.4084	2016	10	100	Greenpeace.2016	1
SanClemente	-87.022	20.4084	2009	5	100	MERA.PNAC	4
SanClemente	-87.022	20.4084	2009	4.16667	100	MERA.PNAC	2
SanClemente	-87.022	20.4084	2009	2.5	100	MERA.PNAC	4
SanClemente	-87.022	20.4084	2009	5	100	MERA.PNAC	4
SanClemente	-87.022	20.4084	2009	3.33333	100	MERA.PNAC	8
SanClemente	-87.022	20.4084	2009	3.33333	100	MERA.PNAC	5
SanClemente	-87.022	20.4084	2011	2.5	100	MERA.PNAC	16
SanClemente	-87.022	20.4084	2011	7.5	100	MERA.PNAC	23
SanClemente	-87.022	20.4084	2011	5	100	MERA.PNAC	7
SanClemente	-87.022	20.4084	2011	5.83333	100	MERA.PNAC	18
SanClemente	-87.022	20.4084	2011	0.833333	100	MERA.PNAC	11
SanClemente	-87.022	20.4084	2011	1.66667	100	MERA.PNAC	10
TanchacteNorte	-86.8353	20.9106	2006	7.7	100	PNAPM-CONANP.SF	43
TanchacteNorte	-86.8353	20.9106	2016	21	100	Monitoreo.PNAPM	39
TanchacteNorte	-86.8353	20.9106	2016	14	100	Monitoreo.PNAPM	52
TanchacteNorte	-86.8353	20.9106	2016	11	100	Monitoreo.PNAPM	55
TanchacteNorte	-86.8353	20.9106	2016	42	100	Monitoreo.PNAPM	18
TanchacteNorte	-86.8353	20.9106	2016	10	100	Monitoreo.PNAPM	45
TanchacteNorte	-86.8353	20.9106	2016	11	100	Monitoreo.PNAPM	31
TanchacteNorte	-86.8353	20.9106	2016	4	100	Monitoreo.PNAPM	56
TanchacteNorte	-86.8353	20.9106	2016	20	100	Monitoreo.PNAPM	34
TanchacteNorte	-86.8353	20.9106	2008	16.6667	100	Monitoreo.PNAPM	13
TanchacteNorte	-86.8353	20.9106	2008	12.5	100	Monitoreo.PNAPM	10
TanchacteNorte	-86.8353	20.9106	2010	15.8333	100	Monitoreo.PNAPM	58
TanchacteNorte	-86.8353	20.9106	2010	7.5	100	Monitoreo.PNAPM	58
TanchacteNorte	-86.8353	20.9106	2010	5.83333	100	Monitoreo.PNAPM	59
TanchacteNorte	-86.8353	20.9106	2012	4.16667	100	PROMOBI.PNAPM	63
TanchacteNorte	-86.8353	20.9106	2012	20.8333	100	PROMOBI.PNAPM	52
TanchacteNorte	-86.8353	20.9106	2012	15	100	PROMOBI.PNAPM	37
TanchacteNorte	-86.8353	20.9106	2012	5.83333	100	PROMOBI.PNAPM	41
TanchacteNorte	-86.8353	20.9106	2012	11.6667	100	PROMOBI.PNAPM	32
TanchacteNorte	-86.8353	20.9106	2013	10.8333	100	PROMOBI.PNAPM	20
TanchacteNorte	-86.8353	20.9106	2013	18.3333	100	PROMOBI.PNAPM	22
TanchacteNorte	-86.8353	20.9106	2013	9.16667	100	PROMOBI.PNAPM	44
TanchacteNorte	-86.8353	20.9106	2013	0	100	PROMOBI.PNAPM	23
TanchacteNorte	-86.8353	20.9106	2013	9.16667	100	PROMOBI.PNAPM	47
TanchacteNorte	-86.8353	20.9106	2014	0	100	PROMOBI.PNAPM	32
TanchacteNorte	-86.8353	20.9106	2014	15	100	PROMOBI.PNAPM	43
TanchacteNorte	-86.8353	20.9106	2014	24.1667	100	PROMOBI.PNAPM	45
TanchacteNorte	-86.8353	20.9106	2014	4.16667	100	PROMOBI.PNAPM	44
TanchacteNorte	-86.8353	20.9106	2014	9.16667	100	PROMOBI.PNAPM	38
TanchacteNorte	-86.8353	20.9106	2015	13.3333	100	PROMOBI.PNAPM	24
TanchacteNorte	-86.8353	20.9106	2015	14.1667	100	PROMOBI.PNAPM	27
TanchacteNorte	-86.8353	20.9106	2015	12.5	100	PROMOBI.PNAPM	22
TanchacteNorte	-86.8353	20.9106	2015	14.1667	100	PROMOBI.PNAPM	18
TanchacteNorte	-86.8353	20.9106	2015	10.8333	100	PROMOBI.PNAPM	12
TanchacteNorte	-86.8353	20.9106	2007	8.6	100	SNIB.CONABIO	27
TanchacteNorte	-86.8353	20.9106	2007	8.6	100	SNIB.CONABIO	56
TanchacteNorte	-86.8353	20.9106	2007	16.9	100	SNIB.CONABIO	35
TanchacteNorte	-86.8353	20.9106	2007	2.7	100	SNIB.CONABIO	45
TanchacteNorte	-86.8353	20.9106	2007	2.7	100	SNIB.CONABIO	35
TanchacteSur	-86.8423	20.9022	2016	11	100	Monitoreo.PNAPM	16
TanchacteSur	-86.8423	20.9022	2016	5	100	Monitoreo.PNAPM	45
TanchacteSur	-86.8423	20.9022	2016	22	100	Monitoreo.PNAPM	3
TanchacteSur	-86.8423	20.9022	2016	15	100	Monitoreo.PNAPM	34
TanchacteSur	-86.8423	20.9022	2016	16	100	Monitoreo.PNAPM	0
TanchacteSur	-86.8423	20.9022	2016	31	100	Monitoreo.PNAPM	2
TanchacteSur	-86.8423	20.9022	2016	30	100	Monitoreo.PNAPM	3
TanchacteSur	-86.8423	20.9022	2016	19	100	Monitoreo.PNAPM	17
TanchacteSur	-86.8423	20.9022	2008	16.6667	100	Monitoreo.PNAPM	19
TanchacteSur	-86.8423	20.9022	2008	2.5	100	Monitoreo.PNAPM	23
TanchacteSur	-86.8423	20.9022	2008	4.16667	100	Monitoreo.PNAPM	31
TanchacteSur	-86.8423	20.9022	2011	3.33333	100	Monitoreo.PNAPM	20
TanchacteSur	-86.8423	20.9022	2011	5	100	Monitoreo.PNAPM	21
TanchacteSur	-86.8423	20.9022	2011	5	100	Monitoreo.PNAPM	18
TanchacteSur	-86.8423	20.9022	2011	5.83333	100	Monitoreo.PNAPM	23
TanchacteSur	-86.8423	20.9022	2011	6.66667	100	Monitoreo.PNAPM	22
TanchacteSur	-86.8423	20.9022	2012	9.16667	100	PROMOBI.PNAPM	35
TanchacteSur	-86.8423	20.9022	2012	6.66667	100	PROMOBI.PNAPM	14
TanchacteSur	-86.8423	20.9022	2012	11.6667	100	PROMOBI.PNAPM	47
TanchacteSur	-86.8423	20.9022	2012	5	100	PROMOBI.PNAPM	28
TanchacteSur	-86.8423	20.9022	2013	5	100	PROMOBI.PNAPM	9
TanchacteSur	-86.8423	20.9022	2013	1.66667	100	PROMOBI.PNAPM	20
TanchacteSur	-86.8423	20.9022	2013	2.5	100	PROMOBI.PNAPM	10
TanchacteSur	-86.8423	20.9022	2013	5	100	PROMOBI.PNAPM	11
TanchacteSur	-86.8423	20.9022	2013	10.8333	100	PROMOBI.PNAPM	6
TanchacteSur	-86.8423	20.9022	2014	10	100	PROMOBI.PNAPM	24
TanchacteSur	-86.8423	20.9022	2014	0	100	PROMOBI.PNAPM	21
TanchacteSur	-86.8423	20.9022	2014	17.5	100	PROMOBI.PNAPM	23
TanchacteSur	-86.8423	20.9022	2014	5	100	PROMOBI.PNAPM	1
TanchacteSur	-86.8423	20.9022	2014	7.5	100	PROMOBI.PNAPM	23
TanchacteSur	-86.8423	20.9022	2015	5.83333	100	PROMOBI.PNAPM	10
TanchacteSur	-86.8423	20.9022	2015	5.83333	100	PROMOBI.PNAPM	33
TanchacteSur	-86.8423	20.9022	2015	1.66667	100	PROMOBI.PNAPM	18
TanchacteSur	-86.8423	20.9022	2015	1.66667	100	PROMOBI.PNAPM	23
TanchacteSur	-86.8423	20.9022	2015	3.33333	100	PROMOBI.PNAPM	32
Tormentos	-87.0126	20.4318	2009	2.5	100	MERA.PNAC	9
Tormentos	-87.0126	20.4318	2009	3.33333	100	MERA.PNAC	22
Tormentos	-87.0126	20.4318	2009	0.833333	100	MERA.PNAC	16
Tormentos	-87.0126	20.4318	2009	2.5	100	MERA.PNAC	6
Tormentos	-87.0126	20.4318	2009	1.66667	100	MERA.PNAC	3
Tormentos	-87.0126	20.4318	2009	1.66667	100	MERA.PNAC	21
Tormentos	-87.0126	20.4318	2011	5.83333	100	MERA.PNAC	1
Tormentos	-87.0126	20.4318	2011	9.16667	100	MERA.PNAC	1
Tormentos	-87.0126	20.4318	2011	3.30579	100	MERA.PNAC	0
Tormentos	-87.0126	20.4318	2011	3.33333	100	MERA.PNAC	1
Tormentos	-87.0126	20.4318	2011	4.20168	100	MERA.PNAC	1
Tormentos	-87.0126	20.4318	2011	0.833333	100	MERA.PNAC	6
Tormentos	-87.0126	20.4318	2014	6.66667	100	MERA.PNAC	22
Tormentos	-87.0126	20.4318	2014	0.833333	100	MERA.PNAC	27
Tormentos	-87.0126	20.4318	2014	4.16667	100	MERA.PNAC	23
Tormentos	-87.0126	20.4318	2014	5	100	MERA.PNAC	41
Tormentos	-87.0126	20.4318	2014	5.83333	100	MERA.PNAC	24
Tormentos	-87.0126	20.4318	2014	9.16667	100	MERA.PNAC	23
Tormentos	-87.0126	20.4318	2016	5	100	Greenpeace.2016	58
Tormentos	-87.0126	20.4318	2016	14	100	Greenpeace.2016	23
Tormentos	-87.0126	20.4318	2016	0	100	Greenpeace.2016	31
Tormentos	-87.0126	20.4318	2016	1	100	Greenpeace.2016	7
Tormentos	-87.0126	20.4318	2016	8	100	Greenpeace.2016	33
Tormentos	-87.0126	20.4318	2016	8	100	Greenpeace.2016	44
Yucab	-87.0175	20.4206	2005	32.5	100	Monitoreo.PNAC	13
Yucab	-87.0175	20.4206	2005	25.8333	100	Monitoreo.PNAC	7
Yucab	-87.0175	20.4206	2005	26.6667	100	Monitoreo.PNAC	12
Yucab	-87.0175	20.4206	2005	22.5	100	Monitoreo.PNAC	13
Yucab	-87.0175	20.4206	2005	27.5	100	Monitoreo.PNAC	13
Yucab	-87.0175	20.4206	2005	27.5	100	Monitoreo.PNAC	11
Yucab	-87.0175	20.4206	2005	19.1667	100	Monitoreo.PNAC	5
Yucab	-87.0175	20.4206	2005	25	100	Monitoreo.PNAC	7
Yucab	-87.0175	20.4206	2005	11.6667	100	Monitoreo.PNAC	17
Yucab	-87.0175	20.4206	2005	15.8333	100	Monitoreo.PNAC	9
Yucab	-87.0175	20.4206	2005	26.6667	100	Monitoreo.PNAC	10
Yucab	-87.0175	20.4206	2005	14.1667	100	Monitoreo.PNAC	9
Yucab	-87.0175	20.4206	2005	5	100	Monitoreo.PNAC	5
Yucab	-87.0175	20.4206	2005	8.33333	100	Monitoreo.PNAC	3
Yucab	-87.0175	20.4206	2005	9.16667	100	Monitoreo.PNAC	3
Yucab	-87.0175	20.4206	2005	10.8333	100	Monitoreo.PNAC	3
Yucab	-87.0175	20.4206	2005	6.66667	100	Monitoreo.PNAC	2
Yucab	-87.0175	20.4206	2005	9.16667	100	Monitoreo.PNAC	0
Yucab	-87.0175	20.4206	2006	3.33333	100	Monitoreo.PNAC	0
Yucab	-87.0175	20.4206	2006	4.16667	100	Monitoreo.PNAC	2
Yucab	-87.0175	20.4206	2006	5.83333	100	Monitoreo.PNAC	0
Yucab	-87.0175	20.4206	2006	6.66667	100	Monitoreo.PNAC	3
Yucab	-87.0175	20.4206	2006	9.16667	100	Monitoreo.PNAC	1
Yucab	-87.0175	20.4206	2006	7.5	100	Monitoreo.PNAC	3
Yucab	-87.0175	20.4206	2006	23.3333	100	Monitoreo.PNAC	8
Yucab	-87.0175	20.4206	2006	7.5	100	Monitoreo.PNAC	1
Yucab	-87.0175	20.4206	2006	27.5	100	Monitoreo.PNAC	3
Yucab	-87.0175	20.4206	2006	5	100	Monitoreo.PNAC	1
Yucab	-87.0175	20.4206	2006	5.83333	100	Monitoreo.PNAC	3
Yucab	-87.0175	20.4206	2006	18.3333	100	Monitoreo.PNAC	2
Yucab	-87.0175	20.4206	2007	5	100	Monitoreo.PNAC	7
Yucab	-87.0175	20.4206	2007	9.16667	100	Monitoreo.PNAC	4
Yucab	-87.0175	20.4206	2007	7.5	100	Monitoreo.PNAC	2
Yucab	-87.0175	20.4206	2007	13.3333	100	Monitoreo.PNAC	4
Yucab	-87.0175	20.4206	2007	10.8333	100	Monitoreo.PNAC	8
Yucab	-87.0175	20.4206	2007	7.5	100	Monitoreo.PNAC	6
Yucab	-87.0175	20.4206	2007	6.66667	100	Monitoreo.PNAC	4
Yucab	-87.0175	20.4206	2007	10	100	Monitoreo.PNAC	4
Yucab	-87.0175	20.4206	2007	7.5	100	Monitoreo.PNAC	3
Yucab	-87.0175	20.4206	2007	8.33333	100	Monitoreo.PNAC	5
Yucab	-87.0175	20.4206	2007	10.8333	100	Monitoreo.PNAC	4
Yucab	-87.0175	20.4206	2007	6.66667	100	Monitoreo.PNAC	2
Yucab	-87.0175	20.4206	2008	5.83333	100	Monitoreo.PNAC	6
Yucab	-87.0175	20.4206	2008	3.33333	100	Monitoreo.PNAC	4
Yucab	-87.0175	20.4206	2008	9.16667	100	Monitoreo.PNAC	7
Yucab	-87.0175	20.4206	2008	5.83333	100	Monitoreo.PNAC	8
Yucab	-87.0175	20.4206	2008	2.5	100	Monitoreo.PNAC	13
Yucab	-87.0175	20.4206	2008	1.66667	100	Monitoreo.PNAC	7
Yucab	-87.0175	20.4206	2008	2.5	100	Monitoreo.PNAC	5
Yucab	-87.0175	20.4206	2008	4.16667	100	Monitoreo.PNAC	5
Yucab	-87.0175	20.4206	2008	10.8333	100	Monitoreo.PNAC	3
Yucab	-87.0175	20.4206	2008	5.83333	100	Monitoreo.PNAC	6
Yucab	-87.0175	20.4206	2008	2.5	100	Monitoreo.PNAC	1
Yucab	-87.0175	20.4206	2008	2.5	100	Monitoreo.PNAC	4
Yucab	-87.0175	20.4206	2009	6.66667	100	MERA.PNAC	7
Yucab	-87.0175	20.4206	2009	6.66667	100	MERA.PNAC	3
Yucab	-87.0175	20.4206	2009	7.5	100	MERA.PNAC	6
Yucab	-87.0175	20.4206	2009	7.5	100	MERA.PNAC	7
Yucab	-87.0175	20.4206	2009	2.5	100	MERA.PNAC	8
Yucab	-87.0175	20.4206	2009	2.5	100	MERA.PNAC	6
Yucab	-87.0175	20.4206	2009	2.5	100	Monitoreo.PNAC	5
Yucab	-87.0175	20.4206	2009	2.5	100	Monitoreo.PNAC	8
Yucab	-87.0175	20.4206	2009	6.66667	100	Monitoreo.PNAC	9
Yucab	-87.0175	20.4206	2009	1.66667	100	Monitoreo.PNAC	7
Yucab	-87.0175	20.4206	2009	4.16667	100	Monitoreo.PNAC	7
Yucab	-87.0175	20.4206	2009	3.33333	100	Monitoreo.PNAC	15
Yucab	-87.0175	20.4206	2009	6.66667	100	Monitoreo.PNAC	7
Yucab	-87.0175	20.4206	2009	6.66667	100	Monitoreo.PNAC	3
Yucab	-87.0175	20.4206	2009	7.5	100	Monitoreo.PNAC	6
Yucab	-87.0175	20.4206	2009	7.5	100	Monitoreo.PNAC	7
Yucab	-87.0175	20.4206	2009	2.5	100	Monitoreo.PNAC	8
Yucab	-87.0175	20.4206	2009	2.5	100	Monitoreo.PNAC	6
Yucab	-87.0175	20.4206	2010	3.33333	100	Monitoreo.PNAC	5
Yucab	-87.0175	20.4206	2010	1.66667	100	Monitoreo.PNAC	7
Yucab	-87.0175	20.4206	2010	4.16667	100	Monitoreo.PNAC	5
Yucab	-87.0175	20.4206	2010	3.33333	100	Monitoreo.PNAC	6
Yucab	-87.0175	20.4206	2010	2.5	100	Monitoreo.PNAC	14
Yucab	-87.0175	20.4206	2010	5	100	Monitoreo.PNAC	4
Yucab	-87.0175	20.4206	2010	5	100	Monitoreo.PNAC	6
Yucab	-87.0175	20.4206	2010	7.5	100	Monitoreo.PNAC	16
Yucab	-87.0175	20.4206	2010	10.8333	100	Monitoreo.PNAC	8
Yucab	-87.0175	20.4206	2010	1.66667	100	Monitoreo.PNAC	16
Yucab	-87.0175	20.4206	2010	3.33333	100	Monitoreo.PNAC	13
Yucab	-87.0175	20.4206	2010	3.33333	100	Monitoreo.PNAC	12
Yucab	-87.0175	20.4206	2011	11.6667	100	MERA.PNAC	26
Yucab	-87.0175	20.4206	2011	4.16667	100	MERA.PNAC	23
Yucab	-87.0175	20.4206	2011	8.33333	100	MERA.PNAC	24
Yucab	-87.0175	20.4206	2011	4.16667	100	MERA.PNAC	18
Yucab	-87.0175	20.4206	2011	5	100	MERA.PNAC	11
Yucab	-87.0175	20.4206	2011	5	100	MERA.PNAC	15
Yucab	-87.0175	20.4206	2012	27.5	100	PROMOBI.PNAC	9
Yucab	-87.0175	20.4206	2012	27.5	100	PROMOBI.PNAC	8
Yucab	-87.0175	20.4206	2012	27.5	100	PROMOBI.PNAC	7
Yucab	-87.0175	20.4206	2012	33.3333	100	PROMOBI.PNAC	6
Yucab	-87.0175	20.4206	2012	23.3333	100	PROMOBI.PNAC	8
Yucab	-87.0175	20.4206	2012	36.6667	100	PROMOBI.PNAC	4
Yucab	-87.0175	20.4206	2012	9.16667	100	PROMOBI.PNAC	17
Yucab	-87.0175	20.4206	2012	7.5	100	PROMOBI.PNAC	11
Yucab	-87.0175	20.4206	2012	15.8333	100	PROMOBI.PNAC	18
Yucab	-87.0175	20.4206	2012	5	100	PROMOBI.PNAC	18
Yucab	-87.0175	20.4206	2012	4.16667	100	PROMOBI.PNAC	27
Yucab	-87.0175	20.4206	2012	19.1667	100	PROMOBI.PNAC	19
Yucab	-87.0175	20.4206	2013	11.6667	100	PROMOBI.PNAC	13
Yucab	-87.0175	20.4206	2013	10.8333	100	PROMOBI.PNAC	17
Yucab	-87.0175	20.4206	2013	25.8333	100	PROMOBI.PNAC	3
Yucab	-87.0175	20.4206	2013	18.3333	100	PROMOBI.PNAC	19
Yucab	-87.0175	20.4206	2013	9.16667	100	PROMOBI.PNAC	12
Yucab	-87.0175	20.4206	2013	15.8333	100	PROMOBI.PNAC	16
Yucab	-87.0175	20.4206	2013	17.5	100	PROMOBI.PNAC	23
Yucab	-87.0175	20.4206	2013	20	100	PROMOBI.PNAC	11
Yucab	-87.0175	20.4206	2013	20	100	PROMOBI.PNAC	15
Yucab	-87.0175	20.4206	2013	25.8333	100	PROMOBI.PNAC	14
Yucab	-87.0175	20.4206	2013	25.8333	100	PROMOBI.PNAC	14
Yucab	-87.0175	20.4206	2013	18.3333	100	PROMOBI.PNAC	14
Yucab	-87.0175	20.4206	2014	3.33333	100	MERA.PNAC	39
Yucab	-87.0175	20.4206	2014	7.5	100	MERA.PNAC	33
Yucab	-87.0175	20.4206	2014	10	100	MERA.PNAC	38
Yucab	-87.0175	20.4206	2014	4.16667	100	MERA.PNAC	23
Yucab	-87.0175	20.4206	2014	7.5	100	MERA.PNAC	27
Yucab	-87.0175	20.4206	2014	1.66667	100	MERA.PNAC	38
Yucab	-87.0175	20.4206	2014	25	100	PROMOBI.PNAC	12
Yucab	-87.0175	20.4206	2014	20	100	PROMOBI.PNAC	18
Yucab	-87.0175	20.4206	2014	17.5	100	PROMOBI.PNAC	14
Yucab	-87.0175	20.4206	2014	16.6667	100	PROMOBI.PNAC	12
Yucab	-87.0175	20.4206	2014	14.1667	100	PROMOBI.PNAC	2
Yucab	-87.0175	20.4206	2014	15.8333	100	PROMOBI.PNAC	27
Yucab	-87.0175	20.4206	2014	5	100	PROMOBI.PNAC	7
Yucab	-87.0175	20.4206	2014	16.6667	100	PROMOBI.PNAC	6
Yucab	-87.0175	20.4206	2014	27.5	100	PROMOBI.PNAC	10
Yucab	-87.0175	20.4206	2014	22.5	100	PROMOBI.PNAC	7
Yucab	-87.0175	20.4206	2014	20	100	PROMOBI.PNAC	3
Yucab	-87.0175	20.4206	2014	21.6667	100	PROMOBI.PNAC	5
Yucab	-87.0175	20.4206	2015	20	100	PROMOBI.PNAC	8
Yucab	-87.0175	20.4206	2015	17.5	100	PROMOBI.PNAC	13
Yucab	-87.0175	20.4206	2015	18.3333	100	PROMOBI.PNAC	8
Yucab	-87.0175	20.4206	2015	20.8333	100	PROMOBI.PNAC	8
Yucab	-87.0175	20.4206	2015	21.6667	100	PROMOBI.PNAC	2
Yucab	-87.0175	20.4206	2015	23.3333	100	PROMOBI.PNAC	17
Yucab	-87.0175	20.4206	2016	33	100	CONACYT.247104	8
Yucab	-87.0175	20.4206	2016	14	100	CONACYT.247104	10
Yucab	-87.0175	20.4206	2016	24	100	CONACYT.247104	10
Yucab	-87.0175	20.4206	2016	3	100	CONACYT.247104	4
Yucab	-87.0175	20.4206	2016	16	100	CONACYT.247104	12
Yucab	-87.0175	20.4206	2016	21	100	CONACYT.247104	5
