# Supplementary material
Source: MDPI journal article supplement (https://www.mdpi.com/1424-2818/12/9/338)
Supplement: s1 [file s1 › Supplementary material/S3_new_Distance_to_shore.xlsx]

## Sheet: Hoja1
Site_code	Survey_year	Longitude	Longitude2	Latitude	Distance to mainland [m]	distance to island [m]
Bonanza	2005	-86.8141	273.186	20.9642	1675.63	-
CardonaMERASomero	2009	-87.0195	272.98	20.4078	20934.6	325.37
Chankanaab	1996	-87.0023	272.998	20.44	19712.5	375.18
ChankanaabBolonesMERAProfundo	2009	-87.0051	272.995	20.4401	19656.2	528.22
Colombia	1996	-87.0272	272.973	20.32430556	28409	1467.88
ColombiaMERASomero	2009	-87.0244	272.976	20.3205	28275.8	1262.87
Cuevones	2014	-86.742	273.258	21.16173	2533.68	5497.89
Dalila	2016	-87.0291	272.971	20.34877778	25326.9	766.91
DzulHaMERASomero	2009	-86.9871	273.013	20.4588	19547.8	100.11
HananII	2016	-86.761	273.239	20.499	33554.8	732.26
Islote	2005	-87.0023	272.998	20.2703	36162.7	1131.49
Jardines	2005	-86.8802	273.12	20.8313556	837.62	-
LaBocana	1995	20.8864	273.159	-86.8411	1453.59	-
LaPared	2016	-86.8762	273.124	20.8242	1652.04	-
Limones	2005	-86.7972	273.203	20.9885	2883.76	-
Mah01	2012	-87.7164	272.284	18.6626	1076.36	-
MX1008	2005	-87.4606	272.539	20.057	1689.87	-
MX1017	2005	-86.7298	273.27	21.1706	4148.68	3874.1
MX1020	2006	-87.7177	272.282	18.6497	925.11	-
MX1042	2005	-87.4579	272.542	20.1153	958.37	-
MX1048	2005	-87.0282	272.972	20.3584	24613.1	351.67
MX1050	2005	-87.1645	272.836	20.5363	244.87	-
MX1053	2005	-86.9707	273.029	20.4862	17897.3	91.06
MX1055	2005	-87.1061	272.894	20.5842	327.58	-
MX1057	2005	-87.0535	272.946	20.6406	319.79	-
MX1065	2006	-87.7907	272.209	18.3531	1085.01	-
MX1116	2005	-87.1492	272.851	20.551	260.77	-
MX1117	2005	-87.4191	272.581	20.218	827.21	-
MX1131	2005	-86.8288	273.171	20.9163	1647
MX1132	2005	-86.7964	273.204	20.9873	3001.39	-
MX1133	2005	-86.7405	273.259	21.1334	67.31	-
MX1136	2006	-87.7984	272.202	18.3497	530.94	-
MX2067	2006	-87.767	272.233	18.4002	391.17	-
MX3009	2005	-86.9999	273	20.2723	34062.2	668.41
MX3054	2005	-86.7526	273.247	20.5112	33499	1006.39
MXXCK01	2012	-87.8274	272.173	18.2137	1571.22	-
MXXCK02	2012	-87.8262	272.174	18.2401	1559.4	-
PalancarJardinesMERASomero	2009	-87.0262	272.974	20.3318	27061.3	919.24
Paraiso	2016	-86.983	273.017	20.4693	18555.5	176.64
ParaisoMERASomero	2009	-86.9815	273.019	20.4694	18654.9	21.76
PasodelCedral	1996	-87.0289	272.971	20.3739	23236.9	502.41
PNAC	2006	-87.0247	272.975	20.2936	31551.3	1029.57
PNCOIMPCPN	2006	-86.7583	273.242	21.180556	4937.69	5004.12
RadioPirata	2016	-86.865	273.135	20.8536	687.99	-
SanClemente	2016	-87.022	272.978	20.4084	20775.6	528.45
Tanchacte.Norte	2005	-86.8353	273.165	20.9106	1046.97	-
TanchacteSur	2016	-86.8423	273.158	20.9022	583.56	-
Tormentos	1996	-87.0126	272.987	20.4318	19689.1	632.82
Yucab	2002	-87.0175	272.983	20.4206	20131.6	575.43
