# Supplementary material
Source: MDPI journal article supplement (https://www.mdpi.com/1424-2818/12/9/338)
Supplement: s1 [file s1 › Supplementary material/S4_2005_Pob_INEGI_ITER.xlsx]

## Sheet: Hoja1
entidad	nom_ent	mun	nom_mun	loc	nom_loc	longitud	latitud	altitud	p_total	p_mas	p_fem	p_0a4_an	p_0a4_ma	p_0a4_fe	p_0a14_a	p_0a14_ma	p_0a14_fe	p_5_an	p_5ymas	p_5ymas_m	p_5ymas_f	p_6a11_an	p_6a14_an	p_6a14_m	p_6a14_f	p_12a14_an	p_12ymas	p_15ymas	p_15ymas_m	p_15ymas_f	p_15a24	p_f_15a49	p_15a59	p_15a59_m	p_15a59_f	p_18ymas	p_m_18ymas	p_f_18ymas	p_60ymas	p_m_60ymas	p_f_60ymas	p_65ymas	p_65ymas_m	p_65ymas_f	rel_h_m	prom_hnv	p_re2000	p_oe2000	p_m_oe2000
23	Quintana Roo	0	Total de la entidad Quintana Roo	0	Total de la Entidad				1135309	574837	560472	107380	54437	52943	320927	163079	157848	22500	890989	451897	439092	127798	191047	97199	93848	63249	740691	677442	343255	334187	205419	285859	633279	320524	312755	616518	312315	304203	44163	22731	21432	27749	14343	13406	102.56	2.18	780521	100783	52343
23	Quintana Roo	0	Total de la entidad Quintana Roo	9998	Localidades de una vivienda				5593	3386	2207	355	179	176	899	454	445	64	4560	2866	1694	315	480	241	239	165	4181	4016	2591	1425	1095	1222	3634	2297	1337	3804	2470	1334	382	294	88	251	195	56	153.42	2.1	3121	616	387
23	Quintana Roo	0	Total de la entidad Quintana Roo	9999	Localidades de dos viviendas				1499	983	516	112	66	46	309	167	142	24	1307	877	430	116	173	88	85	57	1167	1110	776	334	330	267	979	683	296	1036	728	308	131	93	38	80	59	21	190.5	2.77	1056	229	182
23	Quintana Roo	1	Cozumel	0	Total del Municipio				73193	37346	35847	7560	3695	3865	21960	11044	10916	1634	63150	32409	30741	8785	12766	6488	6278	3981	52731	48750	25060	23690	13670	20025	45514	23436	22078	44856	23036	21820	3236	1624	1612	2004	1005	999	104.18	2.09	57083	5435	2917
23	Quintana Roo	1	Cozumel	1	Cozumel	865630	203100	5	71401	36392	35009	7381	3596	3785	21452	10791	10661	1587	61826	31698	30128	8595	12484	6359	6125	3889	51644	47755	24503	23252	13421	19672	44614	22937	21677	43929	22513	21416	3141	1566	1575	1940	963	977	103.95	2.08	55883	5331	2854
23	Quintana Roo	1	Cozumel	57	Las Palmitas	870105	202306	5	16	7	9	1	0	1	1	0	1	0	4	2	2	0	0	0	0	0	4	4	2	2	0	2	4	2	2	4	2	2	0	0	0	0	0	0	77.78	0.5	4	0	0
23	Quintana Roo	1	Cozumel	67	El Cedral	865938	202157	5	33	19	14	1	1	0	3	1	2	0	32	18	14	1	2	0	2	1	31	30	18	12	5	7	21	13	8	30	18	12	9	5	4	8	4	4	135.71	3.25	23	9	4
23	Quintana Roo	1	Cozumel	165	Buenavista	865558	202008	5	4	*	*	*	*	*	*	*	*	*	*	*	*	*	*	*	*	*	*	*	*	*	*	*	*	*	*	*	*	*	*	*	*	*	*	*	*	*	*	*	*
23	Quintana Roo	1	Cozumel	232	Santa Rita	865417	202826	5	14	6	8	2	0	2	5	1	4	0	12	6	6	2	3	1	2	1	10	9	5	4	4	3	9	5	4	7	3	4	0	0	0	0	0	0	75	2	12	0	0
23	Quintana Roo	1	Cozumel	295	San Bernardo	865149	202629	5	3	*	*	*	*	*	*	*	*	*	*	*	*	*	*	*	*	*	*	*	*	*	*	*	*	*	*	*	*	*	*	*	*	*	*	*	*	*	*	*	*
23	Quintana Roo	1	Cozumel	300	San Fernando	865505	202906	5	84	45	39	15	8	7	37	21	16	2	65	35	30	13	20	11	9	7	50	43	22	21	7	16	38	20	18	41	20	21	5	2	3	4	2	2	115.38	3.48	57	7	4
23	Quintana Roo	1	Cozumel	305	San Jorge	865257	202718	5	5	*	*	*	*	*	*	*	*	*	*	*	*	*	*	*	*	*	*	*	*	*	*	*	*	*	*	*	*	*	*	*	*	*	*	*	*	*	*	*	*
23	Quintana Roo	1	Cozumel	317	San Pedro	865453	202858	5	65	35	30	14	9	5	23	14	9	2	51	26	25	6	7	5	2	1	43	42	21	21	11	16	36	18	18	39	20	19	6	3	3	4	3	1	116.67	2.9	50	1	0
23	Quintana Roo	1	Cozumel	318	San Pedro	865532	202931	5	12	*	*	*	*	*	*	*	*	*	*	*	*	*	*	*	*	*	*	*	*	*	*	*	*	*	*	*	*	*	*	*	*	*	*	*	*	*	*	*	*
23	Quintana Roo	1	Cozumel	333	Santa Teresa	865502	202902	5	12	7	5	0	0	0	2	0	2	0	12	7	5	1	2	0	2	1	11	10	7	3	1	2	10	7	3	9	6	3	0	0	0	0	0	0	140	2.5	12	0	0
23	Quintana Roo	1	Cozumel	340	Kin Ha	865207	202642	5	4	*	*	*	*	*	*	*	*	*	*	*	*	*	*	*	*	*	*	*	*	*	*	*	*	*	*	*	*	*	*	*	*	*	*	*	*	*	*	*	*
23	Quintana Roo	1	Cozumel	379	San José	865104	202746	5	1	*	*	*	*	*	*	*	*	*	*	*	*	*	*	*	*	*	*	*	*	*	*	*	*	*	*	*	*	*	*	*	*	*	*	*	*	*	*	*	*
23	Quintana Roo	1	Cozumel	380	El Bosque	865449	202858	5	28	14	14	3	1	2	8	4	4	2	21	11	10	2	3	1	2	1	17	16	8	8	9	8	16	8	8	14	7	7	0	0	0	0	0	0	100	2.33	21	0	0
23	Quintana Roo	1	Cozumel	384	La Herradura	865222	202651	5	3	*	*	*	*	*	*	*	*	*	*	*	*	*	*	*	*	*	*	*	*	*	*	*	*	*	*	*	*	*	*	*	*	*	*	*	*	*	*	*	*
23	Quintana Roo	1	Cozumel	385	Caleta	865848	202755	5	2	*	*	*	*	*	*	*	*	*	*	*	*	*	*	*	*	*	*	*	*	*	*	*	*	*	*	*	*	*	*	*	*	*	*	*	*	*	*	*	*
23	Quintana Roo	1	Cozumel	404	Caribbean Queen	865531	202925	5	19	8	11	0	0	0	6	1	5	0	19	8	11	2	6	1	5	4	17	13	7	6	1	5	12	7	5	12	7	5	1	0	1	1	0	1	72.73	1.11	18	0	0
23	Quintana Roo	1	Cozumel	405	Cune Och	865845	202741	5	1	*	*	*	*	*	*	*	*	*	*	*	*	*	*	*	*	*	*	*	*	*	*	*	*	*	*	*	*	*	*	*	*	*	*	*	*	*	*	*	*
23	Quintana Roo	1	Cozumel	419	Cerro Chumul	865219	202315	5	1	*	*	*	*	*	*	*	*	*	*	*	*	*	*	*	*	*	*	*	*	*	*	*	*	*	*	*	*	*	*	*	*	*	*	*	*	*	*	*	*
23	Quintana Roo	1	Cozumel	422	Dos Arbolitos	865216	202650	5	3	*	*	*	*	*	*	*	*	*	*	*	*	*	*	*	*	*	*	*	*	*	*	*	*	*	*	*	*	*	*	*	*	*	*	*	*	*	*	*	*
23	Quintana Roo	1	Cozumel	426	La Estrella	865439	202839	5	73	36	37	13	7	6	27	11	16	3	52	25	27	8	11	3	8	3	41	38	21	17	9	11	32	17	15	36	19	17	6	4	2	4	2	2	97.3	3.74	50	2	2
23	Quintana Roo	1	Cozumel	427	San Pedro	865427	202927	5	4	*	*	*	*	*	*	*	*	*	*	*	*	*	*	*	*	*	*	*	*	*	*	*	*	*	*	*	*	*	*	*	*	*	*	*	*	*	*	*	*
23	Quintana Roo	1	Cozumel	432	Gallo de Oro	865208	202635	5	4	*	*	*	*	*	*	*	*	*	*	*	*	*	*	*	*	*	*	*	*	*	*	*	*	*	*	*	*	*	*	*	*	*	*	*	*	*	*	*	*
23	Quintana Roo	1	Cozumel	456	Sol Estéreo	865349	202802	5	4	*	*	*	*	*	*	*	*	*	*	*	*	*	*	*	*	*	*	*	*	*	*	*	*	*	*	*	*	*	*	*	*	*	*	*	*	*	*	*	*
23	Quintana Roo	1	Cozumel	457	Santa Magdalena	865439	202906	5	12	7	5	3	3	0	4	3	1	1	9	4	5	0	0	0	0	0	8	8	4	4	5	4	8	4	4	8	4	4	0	0	0	0	0	0	140	2.75	7	2	1
23	Quintana Roo	1	Cozumel	458	Lindavista	865441	202904	5	16	8	8	3	1	2	6	2	4	1	13	7	6	1	2	0	2	1	11	10	6	4	4	4	10	6	4	9	6	3	0	0	0	0	0	0	100	1.2	11	1	0
23	Quintana Roo	1	Cozumel	459	San Lorenzo	865456	202900	5	60	33	27	5	4	1	10	8	2	2	17	10	7	2	3	3	0	1	13	12	6	6	1	4	10	5	5	12	6	6	2	1	1	1	1	0	122.22	4.2	16	0	0
23	Quintana Roo	1	Cozumel	460	Glenda Vázquez	865539	202936	5	4	*	*	*	*	*	*	*	*	*	*	*	*	*	*	*	*	*	*	*	*	*	*	*	*	*	*	*	*	*	*	*	*	*	*	*	*	*	*	*	*
23	Quintana Roo	1	Cozumel	462	Los Pinos	865456	202857	5	16	8	8	3	1	2	4	2	2	1	5	3	2	0	0	0	0	0	4	4	2	2	1	1	3	1	2	4	2	2	1	1	0	1	1	0	100	5.5	5	0	0
23	Quintana Roo	1	Cozumel	465	San Andrés	870017	202230	5	1	*	*	*	*	*	*	*	*	*	*	*	*	*	*	*	*	*	*	*	*	*	*	*	*	*	*	*	*	*	*	*	*	*	*	*	*	*	*	*	*
23	Quintana Roo	1	Cozumel	474	Kilómetro Cinco	865443	202846	5	18	9	9	3	0	3	7	2	5	2	15	9	6	1	2	1	1	1	12	11	7	4	4	3	10	7	3	10	6	4	1	0	1	0	0	0	100	3.2	13	2	1
23	Quintana Roo	1	Cozumel	475	El Naranjal	865224	202658	5	4	*	*	*	*	*	*	*	*	*	*	*	*	*	*	*	*	*	*	*	*	*	*	*	*	*	*	*	*	*	*	*	*	*	*	*	*	*	*	*	*
23	Quintana Roo	1	Cozumel	476	Kilómetro Tres (Los Barrera)	865533	202927	5	4	*	*	*	*	*	*	*	*	*	*	*	*	*	*	*	*	*	*	*	*	*	*	*	*	*	*	*	*	*	*	*	*	*	*	*	*	*	*	*	*
23	Quintana Roo	1	Cozumel	480	Rancho Lulú	865137	202626	5	3	*	*	*	*	*	*	*	*	*	*	*	*	*	*	*	*	*	*	*	*	*	*	*	*	*	*	*	*	*	*	*	*	*	*	*	*	*	*	*	*
23	Quintana Roo	1	Cozumel	486	Mape	865437	202913	5	4	*	*	*	*	*	*	*	*	*	*	*	*	*	*	*	*	*	*	*	*	*	*	*	*	*	*	*	*	*	*	*	*	*	*	*	*	*	*	*	*
23	Quintana Roo	1	Cozumel	487	María Magdalena	865411	202933	5	2	*	*	*	*	*	*	*	*	*	*	*	*	*	*	*	*	*	*	*	*	*	*	*	*	*	*	*	*	*	*	*	*	*	*	*	*	*	*	*	*
23	Quintana Roo	1	Cozumel	492	Mi Ranchito	865542	202939	5	12	6	6	1	1	0	4	2	2	0	11	5	6	3	3	1	2	0	8	8	4	4	1	3	5	2	3	7	4	3	3	2	1	2	2	0	100	1.75	11	0	0
23	Quintana Roo	1	Cozumel	498	Palmar Primero	865859	202718	5	16	8	8	0	0	0	2	0	2	0	16	8	8	2	2	0	2	0	14	14	8	6	1	3	12	7	5	14	8	6	2	1	1	2	1	1	100	3.17	16	0	0
23	Quintana Roo	1	Cozumel	508	San Demetrio	865538	202925	5	1	*	*	*	*	*	*	*	*	*	*	*	*	*	*	*	*	*	*	*	*	*	*	*	*	*	*	*	*	*	*	*	*	*	*	*	*	*	*	*	*
23	Quintana Roo	1	Cozumel	515	Rancho Argüelles	865217	202645	5	2	*	*	*	*	*	*	*	*	*	*	*	*	*	*	*	*	*	*	*	*	*	*	*	*	*	*	*	*	*	*	*	*	*	*	*	*	*	*	*	*
23	Quintana Roo	1	Cozumel	546	San José	865441	202845	5	4	*	*	*	*	*	*	*	*	*	*	*	*	*	*	*	*	*	*	*	*	*	*	*	*	*	*	*	*	*	*	*	*	*	*	*	*	*	*	*	*
23	Quintana Roo	1	Cozumel	571	San Ramón	865421	202826	5	56	32	24	8	8	0	24	15	9	4	36	18	18	11	12	6	6	1	21	20	11	9	2	9	19	10	9	20	11	9	1	1	0	0	0	0	133.33	2.7	33	3	1
23	Quintana Roo	1	Cozumel	576	Margarita	865425	202832	5	1	*	*	*	*	*	*	*	*	*	*	*	*	*	*	*	*	*	*	*	*	*	*	*	*	*	*	*	*	*	*	*	*	*	*	*	*	*	*	*	*
23	Quintana Roo	1	Cozumel	580	El Parador	865422	202829	5	5	*	*	*	*	*	*	*	*	*	*	*	*	*	*	*	*	*	*	*	*	*	*	*	*	*	*	*	*	*	*	*	*	*	*	*	*	*	*	*	*
23	Quintana Roo	1	Cozumel	581	Los Laureles	865448	202851	5	6	*	*	*	*	*	*	*	*	*	*	*	*	*	*	*	*	*	*	*	*	*	*	*	*	*	*	*	*	*	*	*	*	*	*	*	*	*	*	*	*
23	Quintana Roo	1	Cozumel	592	Lolita Vega	865536	202934	5	74	36	38	10	4	6	24	9	15	3	53	27	26	8	11	3	8	3	42	39	22	17	13	14	35	20	15	33	19	14	4	2	2	3	2	1	94.74	2.68	41	11	7
23	Quintana Roo	1	Cozumel	595	San Bartolo	870036	202213	5	1	*	*	*	*	*	*	*	*	*	*	*	*	*	*	*	*	*	*	*	*	*	*	*	*	*	*	*	*	*	*	*	*	*	*	*	*	*	*	*	*
23	Quintana Roo	1	Cozumel	617	Ramonales	865301	202718	5	6	*	*	*	*	*	*	*	*	*	*	*	*	*	*	*	*	*	*	*	*	*	*	*	*	*	*	*	*	*	*	*	*	*	*	*	*	*	*	*	*
23	Quintana Roo	1	Cozumel	621	Froylán	865400	202811	5	7	*	*	*	*	*	*	*	*	*	*	*	*	*	*	*	*	*	*	*	*	*	*	*	*	*	*	*	*	*	*	*	*	*	*	*	*	*	*	*	*
23	Quintana Roo	1	Cozumel	628	San Carlos	865429	202836	5	31	14	17	6	3	3	11	4	7	2	25	11	14	2	3	0	3	1	21	20	10	10	8	9	18	9	9	19	10	9	2	1	1	2	1	1	82.35	2.5	21	4	2
23	Quintana Roo	1	Cozumel	735	La Amistad	865445	202848	5	2	*	*	*	*	*	*	*	*	*	*	*	*	*	*	*	*	*	*	*	*	*	*	*	*	*	*	*	*	*	*	*	*	*	*	*	*	*	*	*	*
23	Quintana Roo	1	Cozumel	738	Cabaña del Pescador	865542	203248	5	3	*	*	*	*	*	*	*	*	*	*	*	*	*	*	*	*	*	*	*	*	*	*	*	*	*	*	*	*	*	*	*	*	*	*	*	*	*	*	*	*
23	Quintana Roo	1	Cozumel	745	Chichihualco	865553	203225	5	1	*	*	*	*	*	*	*	*	*	*	*	*	*	*	*	*	*	*	*	*	*	*	*	*	*	*	*	*	*	*	*	*	*	*	*	*	*	*	*	*
23	Quintana Roo	1	Cozumel	746	Xkaliahche	865946	202109	5	1	*	*	*	*	*	*	*	*	*	*	*	*	*	*	*	*	*	*	*	*	*	*	*	*	*	*	*	*	*	*	*	*	*	*	*	*	*	*	*	*
23	Quintana Roo	1	Cozumel	747	Country Club	865511	203312	5	19	9	10	0	0	0	3	2	1	0	19	9	10	3	3	2	1	0	16	16	7	9	1	7	14	5	9	16	7	9	2	2	0	1	1	0	90	1.88	12	0	0
23	Quintana Roo	1	Cozumel	750	Villas Dzul-Ha	865910	202730	5	3	*	*	*	*	*	*	*	*	*	*	*	*	*	*	*	*	*	*	*	*	*	*	*	*	*	*	*	*	*	*	*	*	*	*	*	*	*	*	*	*
23	Quintana Roo	1	Cozumel	751	Los Franco	865756	202930	5	2	*	*	*	*	*	*	*	*	*	*	*	*	*	*	*	*	*	*	*	*	*	*	*	*	*	*	*	*	*	*	*	*	*	*	*	*	*	*	*	*
23	Quintana Roo	1	Cozumel	753	González Solís	865535	202928	5	4	*	*	*	*	*	*	*	*	*	*	*	*	*	*	*	*	*	*	*	*	*	*	*	*	*	*	*	*	*	*	*	*	*	*	*	*	*	*	*	*
23	Quintana Roo	1	Cozumel	754	Huerto Familiar	865811	202823	5	77	44	33	6	6	0	28	16	12	3	71	38	33	10	19	9	10	9	58	49	28	21	7	16	46	25	21	45	27	18	3	3	0	2	2	0	133.33	3.1	70	1	1
23	Quintana Roo	1	Cozumel	755	La Ilusión	865430	202922	5	3	*	*	*	*	*	*	*	*	*	*	*	*	*	*	*	*	*	*	*	*	*	*	*	*	*	*	*	*	*	*	*	*	*	*	*	*	*	*	*	*
23	Quintana Roo	1	Cozumel	762	Localidad sin Nombre	865137	202651	5	1	*	*	*	*	*	*	*	*	*	*	*	*	*	*	*	*	*	*	*	*	*	*	*	*	*	*	*	*	*	*	*	*	*	*	*	*	*	*	*	*
23	Quintana Roo	1	Cozumel	763	José María	865159	202640	5	1	*	*	*	*	*	*	*	*	*	*	*	*	*	*	*	*	*	*	*	*	*	*	*	*	*	*	*	*	*	*	*	*	*	*	*	*	*	*	*	*
23	Quintana Roo	1	Cozumel	764	Ubaldo Verde	865204	202640	5	5	*	*	*	*	*	*	*	*	*	*	*	*	*	*	*	*	*	*	*	*	*	*	*	*	*	*	*	*	*	*	*	*	*	*	*	*	*	*	*	*
23	Quintana Roo	1	Cozumel	766	Edilberto Sosa León	865300	202722	5	2	*	*	*	*	*	*	*	*	*	*	*	*	*	*	*	*	*	*	*	*	*	*	*	*	*	*	*	*	*	*	*	*	*	*	*	*	*	*	*	*
23	Quintana Roo	1	Cozumel	767	Ix-Chel	865310	202723	5	9	*	*	*	*	*	*	*	*	*	*	*	*	*	*	*	*	*	*	*	*	*	*	*	*	*	*	*	*	*	*	*	*	*	*	*	*	*	*	*	*
23	Quintana Roo	1	Cozumel	769	Los Nueve Hermanos	865453	202855	3	1	*	*	*	*	*	*	*	*	*	*	*	*	*	*	*	*	*	*	*	*	*	*	*	*	*	*	*	*	*	*	*	*	*	*	*	*	*	*	*	*
23	Quintana Roo	1	Cozumel	770	Rancho Mayen	865444	202903	5	5	*	*	*	*	*	*	*	*	*	*	*	*	*	*	*	*	*	*	*	*	*	*	*	*	*	*	*	*	*	*	*	*	*	*	*	*	*	*	*	*
23	Quintana Roo	1	Cozumel	771	Roberto Tzuc Poot	865442	202906	5	1	*	*	*	*	*	*	*	*	*	*	*	*	*	*	*	*	*	*	*	*	*	*	*	*	*	*	*	*	*	*	*	*	*	*	*	*	*	*	*	*
23	Quintana Roo	1	Cozumel	773	Jorge Pérez	865431	202920	3	2	*	*	*	*	*	*	*	*	*	*	*	*	*	*	*	*	*	*	*	*	*	*	*	*	*	*	*	*	*	*	*	*	*	*	*	*	*	*	*	*
23	Quintana Roo	1	Cozumel	775	San Patricio	865459	202903	3	1	*	*	*	*	*	*	*	*	*	*	*	*	*	*	*	*	*	*	*	*	*	*	*	*	*	*	*	*	*	*	*	*	*	*	*	*	*	*	*	*
23	Quintana Roo	1	Cozumel	776	Rancho Real	865510	202913	3	8	*	*	*	*	*	*	*	*	*	*	*	*	*	*	*	*	*	*	*	*	*	*	*	*	*	*	*	*	*	*	*	*	*	*	*	*	*	*	*	*
23	Quintana Roo	1	Cozumel	777	Plantas y Jardines	865520	202920	5	15	7	8	1	1	0	4	3	1	0	14	6	8	3	3	2	1	0	11	11	4	7	5	6	9	3	6	9	4	5	2	1	1	2	1	1	87.5	2.86	14	0	0
23	Quintana Roo	1	Cozumel	778	La Esmeralda	865534	202932	5	7	*	*	*	*	*	*	*	*	*	*	*	*	*	*	*	*	*	*	*	*	*	*	*	*	*	*	*	*	*	*	*	*	*	*	*	*	*	*	*	*
23	Quintana Roo	1	Cozumel	783	Zona Industrial	865742	202827	5	14	8	6	3	2	1	3	2	1	0	11	6	5	0	0	0	0	0	11	11	6	5	7	4	10	6	4	9	6	3	1	0	1	1	0	1	133.33	2.2	9	2	2
23	Quintana Roo	1	Cozumel	787	Irimar	865932	202629	5	3	*	*	*	*	*	*	*	*	*	*	*	*	*	*	*	*	*	*	*	*	*	*	*	*	*	*	*	*	*	*	*	*	*	*	*	*	*	*	*	*
23	Quintana Roo	1	Cozumel	788	Kilómetro Doce	865143	202636	5	5	*	*	*	*	*	*	*	*	*	*	*	*	*	*	*	*	*	*	*	*	*	*	*	*	*	*	*	*	*	*	*	*	*	*	*	*	*	*	*	*
23	Quintana Roo	1	Cozumel	790	El Mariachi	865753	202740	3	5	*	*	*	*	*	*	*	*	*	*	*	*	*	*	*	*	*	*	*	*	*	*	*	*	*	*	*	*	*	*	*	*	*	*	*	*	*	*	*	*
23	Quintana Roo	1	Cozumel	793	Las Palmeras	865447	202850	5	66	30	36	7	5	2	28	11	17	2	59	25	34	14	19	6	13	5	43	38	19	19	8	16	35	18	17	37	19	18	3	1	2	0	0	0	83.33	1.96	59	0	0
23	Quintana Roo	1	Cozumel	797	Los Pinos	865414	202946	3	5	*	*	*	*	*	*	*	*	*	*	*	*	*	*	*	*	*	*	*	*	*	*	*	*	*	*	*	*	*	*	*	*	*	*	*	*	*	*	*	*
23	Quintana Roo	1	Cozumel	800	Pueblo Nuevo	865735	202730	3	4	*	*	*	*	*	*	*	*	*	*	*	*	*	*	*	*	*	*	*	*	*	*	*	*	*	*	*	*	*	*	*	*	*	*	*	*	*	*	*	*
23	Quintana Roo	1	Cozumel	802	Rancho Jesús	865955	202319	5	1	*	*	*	*	*	*	*	*	*	*	*	*	*	*	*	*	*	*	*	*	*	*	*	*	*	*	*	*	*	*	*	*	*	*	*	*	*	*	*	*
23	Quintana Roo	1	Cozumel	803	Club Salsa	865810	202834	5	1	*	*	*	*	*	*	*	*	*	*	*	*	*	*	*	*	*	*	*	*	*	*	*	*	*	*	*	*	*	*	*	*	*	*	*	*	*	*	*	*
23	Quintana Roo	1	Cozumel	804	San Agustín	865443	202905	5	7	*	*	*	*	*	*	*	*	*	*	*	*	*	*	*	*	*	*	*	*	*	*	*	*	*	*	*	*	*	*	*	*	*	*	*	*	*	*	*	*
23	Quintana Roo	1	Cozumel	806	San Juan	865515	203310	3	9	*	*	*	*	*	*	*	*	*	*	*	*	*	*	*	*	*	*	*	*	*	*	*	*	*	*	*	*	*	*	*	*	*	*	*	*	*	*	*	*
23	Quintana Roo	1	Cozumel	807	San Lorenzo	865735	202859	5	13	6	7	1	0	1	2	0	2	0	12	6	6	1	1	0	1	0	11	11	6	5	3	4	11	6	5	11	6	5	0	0	0	0	0	0	85.71	1.2	10	2	1
23	Quintana Roo	1	Cozumel	809	Las Gemelas	865220	202653	3	4	*	*	*	*	*	*	*	*	*	*	*	*	*	*	*	*	*	*	*	*	*	*	*	*	*	*	*	*	*	*	*	*	*	*	*	*	*	*	*	*
23	Quintana Roo	1	Cozumel	810	San Manuel	865306	202726	5	1	*	*	*	*	*	*	*	*	*	*	*	*	*	*	*	*	*	*	*	*	*	*	*	*	*	*	*	*	*	*	*	*	*	*	*	*	*	*	*	*
23	Quintana Roo	1	Cozumel	812	Dos Arbolitos	865441	202908	5	6	*	*	*	*	*	*	*	*	*	*	*	*	*	*	*	*	*	*	*	*	*	*	*	*	*	*	*	*	*	*	*	*	*	*	*	*	*	*	*	*
23	Quintana Roo	1	Cozumel	813	San Miguel	865411	202950	5	6	*	*	*	*	*	*	*	*	*	*	*	*	*	*	*	*	*	*	*	*	*	*	*	*	*	*	*	*	*	*	*	*	*	*	*	*	*	*	*	*
23	Quintana Roo	1	Cozumel	814	San Miguel Tercero	865332	203019	5	2	*	*	*	*	*	*	*	*	*	*	*	*	*	*	*	*	*	*	*	*	*	*	*	*	*	*	*	*	*	*	*	*	*	*	*	*	*	*	*	*
23	Quintana Roo	1	Cozumel	817	Doña Agustina	865944	202334	5	6	*	*	*	*	*	*	*	*	*	*	*	*	*	*	*	*	*	*	*	*	*	*	*	*	*	*	*	*	*	*	*	*	*	*	*	*	*	*	*	*
23	Quintana Roo	1	Cozumel	818	Santa Cecilia	865124	202607	3	1	*	*	*	*	*	*	*	*	*	*	*	*	*	*	*	*	*	*	*	*	*	*	*	*	*	*	*	*	*	*	*	*	*	*	*	*	*	*	*	*
23	Quintana Roo	1	Cozumel	820	Santa María	865234	202704	5	4	*	*	*	*	*	*	*	*	*	*	*	*	*	*	*	*	*	*	*	*	*	*	*	*	*	*	*	*	*	*	*	*	*	*	*	*	*	*	*	*
23	Quintana Roo	1	Cozumel	831	Centro de Cría de Abejas	865441	202848	5	1	*	*	*	*	*	*	*	*	*	*	*	*	*	*	*	*	*	*	*	*	*	*	*	*	*	*	*	*	*	*	*	*	*	*	*	*	*	*	*	*
23	Quintana Roo	1	Cozumel	835	Lorenzo Campos	865550	202945	5	15	*	*	*	*	*	*	*	*	*	*	*	*	*	*	*	*	*	*	*	*	*	*	*	*	*	*	*	*	*	*	*	*	*	*	*	*	*	*	*	*
23	Quintana Roo	1	Cozumel	838	Adrián Aguilar	865517	202918	3	5	*	*	*	*	*	*	*	*	*	*	*	*	*	*	*	*	*	*	*	*	*	*	*	*	*	*	*	*	*	*	*	*	*	*	*	*	*	*	*	*
23	Quintana Roo	1	Cozumel	840	San Cipriano	865519	202919	3	8	*	*	*	*	*	*	*	*	*	*	*	*	*	*	*	*	*	*	*	*	*	*	*	*	*	*	*	*	*	*	*	*	*	*	*	*	*	*	*	*
23	Quintana Roo	1	Cozumel	845	Buena Esperanza	865434	202828	3	6	*	*	*	*	*	*	*	*	*	*	*	*	*	*	*	*	*	*	*	*	*	*	*	*	*	*	*	*	*	*	*	*	*	*	*	*	*	*	*	*
23	Quintana Roo	1	Cozumel	849	Daniel Guedea Casagne	865413	202941	3	4	3	1	0	0	0	0	0	0	0	4	3	1	0	0	0	0	0	4	4	3	1	0	1	4	3	1	4	3	1	0	0	0	0	0	0	300	8	3	1	1
23	Quintana Roo	1	Cozumel	854	La Esperanza	865432	202836	3	6	*	*	*	*	*	*	*	*	*	*	*	*	*	*	*	*	*	*	*	*	*	*	*	*	*	*	*	*	*	*	*	*	*	*	*	*	*	*	*	*
23	Quintana Roo	1	Cozumel	855	La Estrella	865446	202857	3	18	8	10	3	1	2	5	2	3	0	15	7	8	1	2	1	1	1	14	13	6	7	5	6	13	6	7	12	6	6	0	0	0	0	0	0	80	2.63	15	0	0
23	Quintana Roo	1	Cozumel	858	Kilómetro Cuatro y Medio	865514	202853	3	113	56	57	2	1	1	13	6	7	1	27	13	14	6	10	4	6	4	20	16	8	8	3	7	15	7	8	14	7	7	1	1	0	1	1	0	98.25	1.91	27	0	0
23	Quintana Roo	1	Cozumel	859	El Gringo Loco	865207	202638	3	4	*	*	*	*	*	*	*	*	*	*	*	*	*	*	*	*	*	*	*	*	*	*	*	*	*	*	*	*	*	*	*	*	*	*	*	*	*	*	*	*
23	Quintana Roo	1	Cozumel	862	Iguanas Ranas	870059	202435	5	4	*	*	*	*	*	*	*	*	*	*	*	*	*	*	*	*	*	*	*	*	*	*	*	*	*	*	*	*	*	*	*	*	*	*	*	*	*	*	*	*
23	Quintana Roo	1	Cozumel	867	Carlos Bustamante García	865254	202718	3	5	*	*	*	*	*	*	*	*	*	*	*	*	*	*	*	*	*	*	*	*	*	*	*	*	*	*	*	*	*	*	*	*	*	*	*	*	*	*	*	*
23	Quintana Roo	1	Cozumel	870	Kilómetro Diez	865231	202717	3	8	4	4	0	0	0	1	0	1	0	8	4	4	0	1	0	1	1	8	7	4	3	3	3	7	4	3	6	4	2	0	0	0	0	0	0	100	0.5	8	0	0
23	Quintana Roo	1	Cozumel	872	Jorge Humberto Gamboa	865440	202905	3	4	*	*	*	*	*	*	*	*	*	*	*	*	*	*	*	*	*	*	*	*	*	*	*	*	*	*	*	*	*	*	*	*	*	*	*	*	*	*	*	*
23	Quintana Roo	1	Cozumel	873	Jorge Ortega	865602	203225	3	9	*	*	*	*	*	*	*	*	*	*	*	*	*	*	*	*	*	*	*	*	*	*	*	*	*	*	*	*	*	*	*	*	*	*	*	*	*	*	*	*
23	Quintana Roo	1	Cozumel	876	La Media Luna	865247	202718	3	2	*	*	*	*	*	*	*	*	*	*	*	*	*	*	*	*	*	*	*	*	*	*	*	*	*	*	*	*	*	*	*	*	*	*	*	*	*	*	*	*
23	Quintana Roo	1	Cozumel	879	Palmitas Uno	865839	202750	3	1	*	*	*	*	*	*	*	*	*	*	*	*	*	*	*	*	*	*	*	*	*	*	*	*	*	*	*	*	*	*	*	*	*	*	*	*	*	*	*	*
23	Quintana Roo	1	Cozumel	880	Pancho Tequila	865154	202625	3	4	*	*	*	*	*	*	*	*	*	*	*	*	*	*	*	*	*	*	*	*	*	*	*	*	*	*	*	*	*	*	*	*	*	*	*	*	*	*	*	*
23	Quintana Roo	1	Cozumel	888	Rancho Grande	865145	202625	3	12	*	*	*	*	*	*	*	*	*	*	*	*	*	*	*	*	*	*	*	*	*	*	*	*	*	*	*	*	*	*	*	*	*	*	*	*	*	*	*	*
23	Quintana Roo	1	Cozumel	889	La Esperanza	865249	202711	3	1	*	*	*	*	*	*	*	*	*	*	*	*	*	*	*	*	*	*	*	*	*	*	*	*	*	*	*	*	*	*	*	*	*	*	*	*	*	*	*	*
23	Quintana Roo	1	Cozumel	890	El Refugio	870100	202437	3	7	*	*	*	*	*	*	*	*	*	*	*	*	*	*	*	*	*	*	*	*	*	*	*	*	*	*	*	*	*	*	*	*	*	*	*	*	*	*	*	*
23	Quintana Roo	1	Cozumel	891	San Felipe	865501	202905	1	19	13	6	2	1	1	10	8	2	2	17	12	5	5	6	5	1	1	10	9	5	4	3	4	9	5	4	8	4	4	0	0	0	0	0	0	216.67	2.75	17	0	0
23	Quintana Roo	1	Cozumel	892	San Joaquín	865428	202924	3	25	10	15	2	0	2	9	1	8	1	22	10	12	6	6	1	5	0	15	15	9	6	2	5	14	8	6	15	9	6	1	1	0	1	1	0	66.67	1.83	21	1	1
23	Quintana Roo	1	Cozumel	893	San Vicente	865415	202943	3	2	*	*	*	*	*	*	*	*	*	*	*	*	*	*	*	*	*	*	*	*	*	*	*	*	*	*	*	*	*	*	*	*	*	*	*	*	*	*	*	*
23	Quintana Roo	1	Cozumel	898	El Curvato	865138	202714	3	1	*	*	*	*	*	*	*	*	*	*	*	*	*	*	*	*	*	*	*	*	*	*	*	*	*	*	*	*	*	*	*	*	*	*	*	*	*	*	*	*
23	Quintana Roo	1	Cozumel	900	Vivero Municipal	865552	202937	3	10	10	0	0	0	0	0	0	0	0	10	10	0	0	0	0	0	0	10	10	10	0	3	0	9	9	0	10	10	0	1	1	0	0	0	0	*	*	10	0	0
23	Quintana Roo	1	Cozumel	905	UQROO	865628	202920	3	19	10	9	3	1	2	8	5	3	0	16	9	7	2	5	4	1	3	14	11	5	6	4	6	11	5	6	9	5	4	0	0	0	0	0	0	111.11	3	15	0	0
23	Quintana Roo	1	Cozumel	907	Casa Tunich	870050	202456	5	1	*	*	*	*	*	*	*	*	*	*	*	*	*	*	*	*	*	*	*	*	*	*	*	*	*	*	*	*	*	*	*	*	*	*	*	*	*	*	*	*
23	Quintana Roo	1	Cozumel	917	Juan Leyenda Trigo	865432	202915	3	9	*	*	*	*	*	*	*	*	*	*	*	*	*	*	*	*	*	*	*	*	*	*	*	*	*	*	*	*	*	*	*	*	*	*	*	*	*	*	*	*
23	Quintana Roo	1	Cozumel	919	Palancasa	870126	202149	5	4	*	*	*	*	*	*	*	*	*	*	*	*	*	*	*	*	*	*	*	*	*	*	*	*	*	*	*	*	*	*	*	*	*	*	*	*	*	*	*	*
23	Quintana Roo	1	Cozumel	921	El Regalo de Dios	865445	202900	3	5	*	*	*	*	*	*	*	*	*	*	*	*	*	*	*	*	*	*	*	*	*	*	*	*	*	*	*	*	*	*	*	*	*	*	*	*	*	*	*	*
23	Quintana Roo	1	Cozumel	923	Localidad sin Nombre	865734	202853	5	6	*	*	*	*	*	*	*	*	*	*	*	*	*	*	*	*	*	*	*	*	*	*	*	*	*	*	*	*	*	*	*	*	*	*	*	*	*	*	*	*
23	Quintana Roo	1	Cozumel	925	San Ángel	865450	202856	5	5	*	*	*	*	*	*	*	*	*	*	*	*	*	*	*	*	*	*	*	*	*	*	*	*	*	*	*	*	*	*	*	*	*	*	*	*	*	*	*	*
23	Quintana Roo	1	Cozumel	928	Villas Pavo Real	870023	202225	5	15	6	9	2	0	2	5	1	4	1	13	6	7	1	2	0	2	1	11	10	5	5	1	5	10	5	5	10	5	5	0	0	0	0	0	0	66.67	0.83	8	2	1
23	Quintana Roo	1	Cozumel	930	Colonia Reforma	865541	202932	5	29	16	13	3	1	2	10	6	4	0	26	15	11	6	7	5	2	1	20	19	10	9	5	7	16	9	7	18	10	8	3	1	2	1	0	1	123.08	3	26	0	0
23	Quintana Roo	1	Cozumel	932	Las Fincas	865458	203008	5	282	141	141	26	12	14	85	43	42	6	202	102	100	34	53	27	26	19	162	143	71	72	46	62	138	68	70	130	65	65	5	3	2	3	3	0	100	2.61	185	16	8
23	Quintana Roo	1	Cozumel	933	Holiday Cozumel	865927	202648	5	2	*	*	*	*	*	*	*	*	*	*	*	*	*	*	*	*	*	*	*	*	*	*	*	*	*	*	*	*	*	*	*	*	*	*	*	*	*	*	*	*
23	Quintana Roo	1	Cozumel	934	Localidad sin Nombre	870106	202349	5	6	*	*	*	*	*	*	*	*	*	*	*	*	*	*	*	*	*	*	*	*	*	*	*	*	*	*	*	*	*	*	*	*	*	*	*	*	*	*	*	*
23	Quintana Roo	1	Cozumel	935	Localidad sin Nombre	870055	202448	5	2	*	*	*	*	*	*	*	*	*	*	*	*	*	*	*	*	*	*	*	*	*	*	*	*	*	*	*	*	*	*	*	*	*	*	*	*	*	*	*	*
23	Quintana Roo	1	Cozumel	939	Las Uvas	865922	202648	5	4	*	*	*	*	*	*	*	*	*	*	*	*	*	*	*	*	*	*	*	*	*	*	*	*	*	*	*	*	*	*	*	*	*	*	*	*	*	*	*	*
23	Quintana Roo	1	Cozumel	940	Las Ventanas	870059	202431	5	3	*	*	*	*	*	*	*	*	*	*	*	*	*	*	*	*	*	*	*	*	*	*	*	*	*	*	*	*	*	*	*	*	*	*	*	*	*	*	*	*
23	Quintana Roo	1	Cozumel	941	Villa Dos	870104	202357	5	9	4	5	1	1	0	2	1	1	0	8	3	5	1	1	0	1	0	7	7	3	4	1	3	7	3	4	7	3	4	0	0	0	0	0	0	80	1	4	2	1
23	Quintana Roo	1	Cozumel	9998	Localidades de una vivienda				248	148	100	18	11	7	60	32	28	3	184	113	71	24	39	21	18	15	157	142	92	50	32	38	126	80	46	131	84	47	16	12	4	10	7	3	148	2.92	166	18	14
23	Quintana Roo	1	Cozumel	9999	Localidades de dos viviendas				134	83	51	8	5	3	24	14	10	3	118	74	44	8	13	6	7	5	107	102	65	37	23	29	88	56	32	98	61	37	14	9	5	10	7	3	162.75	1.89	100	17	11
23	Quintana Roo	2	Felipe Carrillo Puerto	0	Total del Municipio				65373	33288	32085	7653	3927	3726	24256	12469	11787	1650	56701	28844	27857	9859	14953	7721	7232	5094	45192	40098	20302	19796	13296	16152	36044	18032	18012	35284	17900	17384	4054	2270	1784	2636	1519	1117	103.75	3.03	55778	690	340
23	Quintana Roo	2	Felipe Carrillo Puerto	1	Felipe Carrillo Puerto	880243	193443	30	21530	10601	10929	2239	1133	1106	7110	3630	3480	467	18381	9011	9370	2949	4404	2256	2148	1455	14965	13510	6514	6996	4477	5852	12417	5930	6487	12002	5782	6220	1093	584	509	706	374	332	97	2.48	17701	572	278
23	Quintana Roo	2	Felipe Carrillo Puerto	6	Ignacio Manuel Altamirano	883429	191715	30	565	291	274	74	35	39	261	137	124	15	491	256	235	114	172	100	72	58	362	304	154	150	109	121	269	132	137	256	129	127	35	22	13	20	14	6	106.2	3.42	488	0	0
23	Quintana Roo	2	Felipe Carrillo Puerto	11	Betania	881710	193818	30	496	241	255	53	25	28	156	79	77	10	443	216	227	59	93	48	45	34	374	340	162	178	119	144	303	141	162	306	148	158	37	21	16	19	12	7	94.51	2.65	443	0	0
23	Quintana Roo	2	Felipe Carrillo Puerto	33	Chancah Derrepente	881347	192400	25	369	201	168	50	29	21	131	72	59	8	318	172	146	45	73	38	35	28	265	237	129	108	81	86	206	111	95	215	119	96	31	18	13	21	15	6	119.64	2.75	316	0	0
23	Quintana Roo	2	Felipe Carrillo Puerto	34	Chancah Veracruz	875940	192940	25	356	192	164	42	28	14	131	80	51	12	313	163	150	49	77	46	31	28	252	224	111	113	86	97	207	99	108	193	97	96	17	12	5	13	9	4	117.07	2.9	312	0	0
23	Quintana Roo	2	Felipe Carrillo Puerto	36	Chanchén Comandante	880630	195018	20	109	61	48	6	3	3	39	21	18	2	103	58	45	20	31	17	14	11	81	70	40	30	24	22	62	36	26	61	33	28	8	4	4	6	4	2	127.08	3.69	103	0	0
23	Quintana Roo	2	Felipe Carrillo Puerto	41	Chun On	875219	200153	15	251	138	113	47	30	17	106	65	41	4	204	108	96	39	55	31	24	16	161	145	73	72	63	59	132	66	66	127	65	62	13	7	6	8	4	4	122.12	3.61	201	1	1
23	Quintana Roo	2	Felipe Carrillo Puerto	42	Chumpón	874844	200008	15	601	301	300	84	40	44	253	124	129	18	517	261	256	100	151	75	76	51	399	348	177	171	130	147	321	165	156	296	152	144	27	12	15	18	8	10	100.33	3.31	517	0	0
23	Quintana Roo	2	Felipe Carrillo Puerto	43	Chunhuás	881237	193750	30	523	264	259	44	24	20	187	87	100	16	478	239	239	77	127	55	72	50	385	335	176	159	108	131	295	153	142	293	150	143	40	23	17	29	17	12	101.93	2.63	476	0	0
23	Quintana Roo	2	Felipe Carrillo Puerto	44	Chunhuhub	883530	193505	40	3928	2053	1875	428	230	198	1504	805	699	85	3498	1822	1676	651	991	527	464	340	2762	2422	1247	1175	703	914	2098	1064	1034	2138	1093	1045	324	183	141	218	132	86	109.49	3.37	3452	35	22
23	Quintana Roo	2	Felipe Carrillo Puerto	52	Dzoyola	882643	195633	40	477	253	224	62	35	27	196	104	92	11	411	217	194	81	123	66	57	42	319	277	148	129	104	106	251	134	117	240	130	110	26	14	12	13	7	6	112.95	3.04	410	0	0
23	Quintana Roo	2	Felipe Carrillo Puerto	53	Dzulá	882455	193614	40	1102	550	552	108	51	57	372	176	196	32	994	499	495	155	232	110	122	77	807	730	374	356	198	257	622	316	306	662	343	319	108	58	50	71	39	32	99.64	3.22	993	1	0
23	Quintana Roo	2	Felipe Carrillo Puerto	58	Filomeno Mata	882341	195134	40	609	304	305	73	34	39	230	110	120	20	534	269	265	88	137	61	76	49	426	377	193	184	124	155	344	169	175	331	173	158	33	24	9	20	14	6	99.67	3.09	533	0	0
23	Quintana Roo	2	Felipe Carrillo Puerto	65	Hobompich	882102	194826	40	117	63	54	14	8	6	39	15	24	4	103	55	48	14	21	5	16	7	85	78	48	30	28	19	67	40	27	66	40	26	11	8	3	8	5	3	116.67	4	103	0	0
23	Quintana Roo	2	Felipe Carrillo Puerto	73	Kancabchén	880917	201400	30	32	20	12	6	3	3	14	8	6	1	26	17	9	4	7	4	3	3	21	18	12	6	8	5	18	12	6	16	11	5	0	0	0	0	0	0	166.67	5	26	0	0
23	Quintana Roo	2	Felipe Carrillo Puerto	82	Komchén	881310	192732	25	13	*	*	*	*	*	*	*	*	*	*	*	*	*	*	*	*	*	*	*	*	*	*	*	*	*	*	*	*	*	*	*	*	*	*	*	*	*	*	*	*
23	Quintana Roo	2	Felipe Carrillo Puerto	84	Kopchen	880908	192225	25	478	251	227	51	22	29	187	90	97	16	427	229	198	83	120	63	57	37	328	291	161	130	109	104	265	145	120	251	142	109	26	16	10	18	10	8	110.57	3.24	424	0	0
23	Quintana Roo	2	Felipe Carrillo Puerto	87	Laguna Kaná	882347	193006	40	851	447	404	86	50	36	310	160	150	22	765	397	368	128	202	101	101	74	615	541	287	254	174	192	463	241	222	467	240	227	78	46	32	47	31	16	110.64	3.66	761	4	2
23	Quintana Roo	2	Felipe Carrillo Puerto	101	Melchor Ocampo	881645	200131	30	175	98	77	23	15	8	66	40	26	6	152	83	69	24	37	20	17	13	122	109	58	51	30	40	97	51	46	98	50	48	12	7	5	6	4	2	127.27	3.28	152	0	0
23	Quintana Roo	2	Felipe Carrillo Puerto	105	Naranjal Poniente	882735	192140	30	685	346	339	94	38	56	314	152	162	31	591	308	283	139	189	97	92	50	421	371	194	177	125	147	333	173	160	318	169	149	38	21	17	21	12	9	102.06	3.51	590	0	0
23	Quintana Roo	2	Felipe Carrillo Puerto	108	Noh-Bec	881009	190835	30	1883	975	908	210	113	97	679	363	316	56	1672	861	811	272	413	219	194	141	1344	1203	611	592	391	474	1059	527	532	1057	541	516	144	84	60	94	57	37	107.38	2.95	1639	23	14
23	Quintana Roo	2	Felipe Carrillo Puerto	110	Noh-Cah	880944	192514	25	86	38	48	10	4	6	28	10	18	3	76	34	42	10	15	4	11	5	63	58	28	30	18	24	53	25	28	49	23	26	5	3	2	3	1	2	79.17	2.91	76	0	0
23	Quintana Roo	2	Felipe Carrillo Puerto	111	La Noria	880925	201237	30	61	34	27	8	7	1	33	20	13	4	53	27	26	14	21	11	10	7	35	28	14	14	11	13	26	13	13	21	12	9	2	1	1	2	1	1	125.93	4	53	0	0
23	Quintana Roo	2	Felipe Carrillo Puerto	118	Petcacab	881330	191720	25	663	342	321	55	33	22	217	114	103	11	599	303	296	84	151	74	77	67	504	437	222	215	152	177	386	195	191	377	191	186	51	27	24	32	20	12	106.54	4.13	589	0	0
23	Quintana Roo	2	Felipe Carrillo Puerto	125	Polinkín	881010	191025	30	202	102	100	21	10	11	78	39	39	6	181	92	89	38	51	27	24	13	137	124	63	61	40	49	110	55	55	111	57	54	14	8	6	10	6	4	102	3.39	180	1	0
23	Quintana Roo	2	Felipe Carrillo Puerto	126	Polyuc	883344	193636	40	934	484	450	103	56	47	346	176	170	16	830	427	403	135	227	114	113	92	679	587	307	280	172	220	517	266	251	525	273	252	70	41	29	51	29	22	107.56	3.58	828	1	0
23	Quintana Roo	2	Felipe Carrillo Puerto	128	Pozo Blanco	883410	192430	25	1	*	*	*	*	*	*	*	*	*	*	*	*	*	*	*	*	*	*	*	*	*	*	*	*	*	*	*	*	*	*	*	*	*	*	*	*	*	*	*	*
23	Quintana Roo	2	Felipe Carrillo Puerto	131	Presidente Juárez	883342	191935	30	860	456	404	110	68	42	359	206	153	18	750	388	362	157	231	129	102	74	575	501	250	251	179	201	442	211	231	424	213	211	59	39	20	36	23	13	112.87	3.86	750	0	0
23	Quintana Roo	2	Felipe Carrillo Puerto	139	Ramonal	883710	192400	30	415	204	211	43	21	22	154	73	81	11	372	183	189	64	100	47	53	36	297	261	131	130	78	101	223	110	113	230	116	114	38	21	17	31	18	13	96.68	3.74	372	0	0
23	Quintana Roo	2	Felipe Carrillo Puerto	149	San Andrés	880757	192403	25	331	176	155	44	26	18	127	71	56	6	287	150	137	54	77	43	34	23	227	204	105	99	73	81	182	90	92	181	95	86	22	15	7	17	12	5	113.55	3.09	284	0	0
23	Quintana Roo	2	Felipe Carrillo Puerto	169	San Felipe Berriozábal	881005	200310	30	375	195	180	53	26	27	181	93	88	14	321	168	153	78	114	60	54	36	229	193	101	92	84	79	178	95	83	161	85	76	15	6	9	14	6	8	108.33	4.05	318	0	0
23	Quintana Roo	2	Felipe Carrillo Puerto	172	San Francisco Aké	882045	195723	40	363	193	170	47	27	20	145	71	74	12	316	166	150	51	86	41	45	35	253	218	122	96	84	81	207	114	93	185	105	80	11	8	3	6	4	2	113.53	3.25	316	0	0
23	Quintana Roo	2	Felipe Carrillo Puerto	176	San Hermenegildo	881119	192312	25	14	4	10	3	1	2	7	1	6	1	11	3	8	2	3	0	3	1	8	7	3	4	1	3	6	3	3	7	3	4	1	0	1	1	0	1	40	1.75	11	0	0
23	Quintana Roo	2	Felipe Carrillo Puerto	181	San José Primero	880639	194843	25	8	4	4	0	0	0	1	0	1	0	8	4	4	0	1	0	1	1	8	7	4	3	1	1	6	3	3	7	4	3	1	1	0	0	0	0	100	0.75	8	0	0
23	Quintana Roo	2	Felipe Carrillo Puerto	182	San José Segundo	881339	195812	20	289	143	146	27	14	13	102	46	56	5	261	128	133	44	70	32	38	26	212	186	96	90	53	69	159	82	77	169	88	81	27	14	13	17	8	9	97.95	3.34	260	0	0
23	Quintana Roo	2	Felipe Carrillo Puerto	193	San Luis	882652	193846	40	136	74	62	15	9	6	42	23	19	0	121	65	56	20	27	14	13	7	101	94	51	43	39	35	90	49	41	82	45	37	4	2	2	4	2	2	119.35	2.98	121	0	0
23	Quintana Roo	2	Felipe Carrillo Puerto	207	San Ramón	880628	200842	30	350	188	162	55	28	27	170	89	81	13	295	160	135	67	102	56	46	35	215	180	99	81	63	66	165	91	74	157	86	71	15	8	7	6	3	3	116.05	4.27	295	0	0
23	Quintana Roo	2	Felipe Carrillo Puerto	221	Santa Lucía	883832	192245	30	133	64	69	19	8	11	54	28	26	1	113	56	57	24	34	20	14	10	88	78	36	42	19	33	65	25	40	70	33	37	13	11	2	11	9	2	92.75	3	113	0	0
23	Quintana Roo	2	Felipe Carrillo Puerto	225	Santa María Poniente	882421	192202	30	686	347	339	106	56	50	288	147	141	25	580	291	289	103	157	82	75	54	452	398	200	198	154	169	367	183	184	346	176	170	31	17	14	16	9	7	102.36	3.17	580	0	0
23	Quintana Roo	2	Felipe Carrillo Puerto	232	Santa Rosa Segundo	881545	195840	20	1026	554	472	136	68	68	412	221	191	24	878	480	398	160	252	141	111	92	694	602	327	275	196	210	528	285	243	522	277	245	74	42	32	47	28	19	117.37	3.79	875	0	0
23	Quintana Roo	2	Felipe Carrillo Puerto	239	Señor	880804	195035	25	2872	1482	1390	367	182	185	1095	565	530	86	2499	1296	1203	439	642	334	308	203	1974	1771	913	858	587	715	1630	833	797	1559	805	754	141	80	61	93	56	37	106.62	3.01	2484	5	1
23	Quintana Roo	2	Felipe Carrillo Puerto	243	Tabi	881552	194313	30	302	151	151	34	19	15	108	51	57	12	268	132	136	42	62	27	35	20	214	194	100	94	68	81	177	91	86	163	85	78	17	9	8	7	4	3	100	2.95	266	0	0
23	Quintana Roo	2	Felipe Carrillo Puerto	244	Tac-Chivo	880230	201313	30	160	80	80	30	15	15	86	43	43	5	130	65	65	34	51	24	27	17	91	74	37	37	37	34	73	36	37	62	31	31	1	1	0	1	1	0	100	3.6	129	0	0
23	Quintana Roo	2	Felipe Carrillo Puerto	248	Tepich	881520	201430	35	2573	1306	1267	425	200	225	1086	538	548	76	2145	1105	1040	398	585	303	282	187	1671	1484	767	717	511	575	1308	675	633	1313	677	636	176	92	84	124	68	56	103.08	3.68	2136	0	0
23	Quintana Roo	2	Felipe Carrillo Puerto	250	Tihosuco	882225	201145	30	4607	2403	2204	570	301	269	1674	870	804	107	4014	2091	1923	652	997	515	482	345	3255	2910	1522	1388	999	1110	2573	1340	1233	2536	1330	1206	337	182	155	220	126	94	109.03	3.17	4000	5	3
23	Quintana Roo	2	Felipe Carrillo Puerto	251	Tixcacal Guardia	881030	195131	30	626	324	302	65	34	31	245	131	114	14	561	290	271	102	166	90	76	64	445	381	193	188	130	163	350	176	174	334	169	165	31	17	14	16	11	5	107.28	2.77	559	0	0
23	Quintana Roo	2	Felipe Carrillo Puerto	254	Trapich	880819	200049	30	236	115	121	34	18	16	113	51	62	7	202	97	105	47	72	28	44	25	148	123	64	59	38	48	112	58	54	108	57	51	11	6	5	3	2	1	95.04	3.18	202	0	0
23	Quintana Roo	2	Felipe Carrillo Puerto	259	Tuzik	880935	195455	25	660	349	311	73	42	31	223	128	95	12	584	305	279	87	138	78	60	51	485	434	219	215	120	167	379	189	190	388	199	189	55	30	25	30	15	15	112.22	3.84	577	0	0
23	Quintana Roo	2	Felipe Carrillo Puerto	262	Uh May	880255	192500	25	425	204	221	49	23	26	158	72	86	11	374	179	195	62	98	46	52	36	301	265	130	135	89	111	238	116	122	237	119	118	27	14	13	15	8	7	92.31	2.85	373	0	0
23	Quintana Roo	2	Felipe Carrillo Puerto	269	Xaan	880231	195958	30	14	8	6	4	2	2	5	3	2	1	10	6	4	0	0	0	0	0	9	9	5	4	1	2	5	3	2	9	5	4	4	2	2	4	2	2	133.33	8.75	10	0	0
23	Quintana Roo	2	Felipe Carrillo Puerto	276	X-Hazil Sur	880427	192330	25	1305	666	639	145	77	68	477	241	236	28	1158	588	570	193	304	154	150	111	937	826	424	402	266	320	745	383	362	719	373	346	81	41	40	57	32	25	104.23	3.01	1147	3	1
23	Quintana Roo	2	Felipe Carrillo Puerto	282	X-Pichil	882241	194145	40	1265	625	640	144	75	69	498	240	258	43	1119	549	570	214	311	146	165	97	862	765	384	381	225	284	661	328	333	676	343	333	104	56	48	63	35	28	97.66	3.67	1118	0	0
23	Quintana Roo	2	Felipe Carrillo Puerto	284	X-Yatil	882640	193945	40	854	436	418	106	45	61	337	155	182	21	743	388	355	126	210	101	109	84	596	512	278	234	162	184	455	242	213	456	245	211	57	36	21	33	21	12	104.31	3.3	743	0	0
23	Quintana Roo	2	Felipe Carrillo Puerto	285	Yaxché Chal	880517	200356	30	16	10	6	1	1	0	1	1	0	0	15	9	6	0	0	0	0	0	15	15	9	6	9	4	13	8	5	15	9	6	2	1	1	0	0	0	166.67	1.33	15	0	0
23	Quintana Roo	2	Felipe Carrillo Puerto	287	Yaxley	881200	194605	25	589	314	275	67	31	36	220	122	98	14	521	282	239	99	139	81	58	40	408	368	191	177	103	144	336	173	163	323	163	160	32	18	14	18	10	8	114.18	3.59	521	0	0
23	Quintana Roo	2	Felipe Carrillo Puerto	288	Yoactún	882130	192740	30	512	267	245	56	30	26	204	100	104	12	455	236	219	74	136	64	72	62	369	307	166	141	86	110	272	146	126	270	146	124	35	20	15	26	13	13	108.98	3.28	455	0	0
23	Quintana Roo	2	Felipe Carrillo Puerto	292	Yodzonot Chico	875559	200244	15	100	52	48	15	7	8	55	27	28	2	85	45	40	26	38	19	19	12	57	45	25	20	15	16	38	20	18	38	21	17	7	5	2	2	2	0	108.33	3.5	85	0	0
23	Quintana Roo	2	Felipe Carrillo Puerto	306	Andrés Quintana Roo	880610	190940	30	316	154	162	37	14	23	136	63	73	9	278	139	139	60	90	47	43	30	209	179	90	89	49	74	156	77	79	167	85	82	23	13	10	16	10	6	95.06	3.12	265	13	6
23	Quintana Roo	2	Felipe Carrillo Puerto	307	Bella Flor	883406	192325	30	3	*	*	*	*	*	*	*	*	*	*	*	*	*	*	*	*	*	*	*	*	*	*	*	*	*	*	*	*	*	*	*	*	*	*	*	*	*	*	*	*
23	Quintana Roo	2	Felipe Carrillo Puerto	308	Canzepchén	880924	200038	30	199	110	89	33	19	14	98	57	41	8	166	91	75	36	57	34	23	21	122	101	53	48	35	40	94	50	44	86	46	40	7	3	4	4	2	2	123.6	3.72	166	0	0
23	Quintana Roo	2	Felipe Carrillo Puerto	312	Chan Chen Chuc	882329	192401	30	63	35	28	9	5	4	31	16	15	3	54	30	24	14	19	10	9	5	37	32	19	13	19	12	29	17	12	27	17	10	3	2	1	1	1	0	125	3.92	54	0	0
23	Quintana Roo	2	Felipe Carrillo Puerto	314	Chan Santa Cruz	881955	192205	30	556	275	281	67	35	32	214	108	106	20	488	240	248	81	127	61	66	46	387	341	167	174	127	148	304	144	160	297	150	147	37	23	14	22	13	9	97.86	2.92	487	0	0
23	Quintana Roo	2	Felipe Carrillo Puerto	322	Emiliano Zapata	883205	191215	30	464	234	230	47	21	26	179	95	84	11	416	212	204	74	121	70	51	47	331	284	138	146	97	119	255	121	134	241	112	129	29	17	12	21	14	7	101.74	3.37	415	1	0
23	Quintana Roo	2	Felipe Carrillo Puerto	324	Francisco I. Madero	880135	200920	30	229	111	118	37	16	21	122	58	64	8	190	94	96	54	77	39	38	23	128	105	52	53	38	46	99	48	51	91	45	46	6	4	2	4	2	2	94.07	3.8	189	0	0
23	Quintana Roo	2	Felipe Carrillo Puerto	325	Francisco May	880927	200915	30	173	85	88	30	11	19	85	36	49	3	143	74	69	35	52	24	28	17	105	88	49	39	35	31	78	44	34	74	39	35	10	5	5	4	3	1	96.59	3.91	143	0	0
23	Quintana Roo	2	Felipe Carrillo Puerto	336	Mixtequilla	881552	192310	25	73	37	36	3	2	1	26	13	13	1	70	35	35	14	22	11	11	8	55	47	24	23	9	20	40	20	20	44	24	20	7	4	3	5	3	2	102.78	2.63	70	0	0
23	Quintana Roo	2	Felipe Carrillo Puerto	339	Nueva Loría	883213	191804	30	207	109	98	17	10	7	81	47	34	4	190	99	91	36	60	34	26	24	150	126	62	64	47	55	109	48	61	107	53	54	17	14	3	14	11	3	111.22	3.48	190	0	0
23	Quintana Roo	2	Felipe Carrillo Puerto	340	Nuevo Israel	883306	191429	30	410	209	201	44	17	27	173	91	82	21	363	190	173	63	108	64	44	45	279	234	116	118	71	94	197	94	103	201	107	94	37	22	15	24	16	8	103.98	3.23	362	0	0
23	Quintana Roo	2	Felipe Carrillo Puerto	354	San Bartolo	880345	200944	30	34	19	15	5	3	2	16	10	6	1	29	16	13	9	10	7	3	1	19	18	9	9	3	7	16	8	8	17	8	9	2	1	1	2	1	1	126.67	4.33	29	0	0
23	Quintana Roo	2	Felipe Carrillo Puerto	358	San Hipólito	875956	200814	15	33	16	17	5	0	5	15	4	11	1	28	16	12	6	9	4	5	3	21	18	12	6	7	6	16	10	6	16	11	5	2	2	0	1	1	0	94.12	2.43	28	0	0
23	Quintana Roo	2	Felipe Carrillo Puerto	368	X-Konha	880607	192550	25	85	46	39	7	3	4	27	17	10	0	77	43	34	12	20	14	6	8	65	57	29	28	14	23	49	24	25	55	29	26	8	5	3	6	4	2	117.95	3	76	1	1
23	Quintana Roo	2	Felipe Carrillo Puerto	381	San Antonio Nuevo	880409	193731	30	46	25	21	0	0	0	10	4	6	0	46	25	21	6	10	4	6	4	40	36	21	15	17	14	34	19	15	29	17	12	2	2	0	1	1	0	119.05	2.12	40	6	2
23	Quintana Roo	2	Felipe Carrillo Puerto	392	Chan-Yodzonot	875720	200325	15	26	15	11	6	5	1	11	9	2	0	20	10	10	4	5	4	1	1	16	15	6	9	7	8	13	5	8	10	6	4	2	1	1	2	1	1	136.36	2.78	20	0	0
23	Quintana Roo	2	Felipe Carrillo Puerto	399	José María Pino Suárez	880701	194814	25	225	120	105	29	19	10	84	50	34	9	195	101	94	31	46	28	18	15	155	140	70	70	50	57	124	62	62	122	61	61	16	8	8	11	5	6	114.29	3.18	194	0	0
23	Quintana Roo	2	Felipe Carrillo Puerto	400	Kampokolché	881947	195108	25	535	278	257	60	24	36	225	116	109	20	475	254	221	96	145	80	65	49	359	310	162	148	107	127	285	145	140	274	146	128	25	17	8	19	14	5	108.17	3.39	475	0	0
23	Quintana Roo	2	Felipe Carrillo Puerto	407	Kilómetro Sesenta y Ocho	873911	200254	10	12	8	4	2	2	0	6	5	1	0	10	6	4	4	4	3	1	0	6	6	3	3	0	2	4	2	2	6	3	3	2	1	1	2	1	1	200	5.33	10	0	0
23	Quintana Roo	2	Felipe Carrillo Puerto	416	Pomká	881925	194140	30	20	9	11	1	1	0	3	3	0	1	19	8	11	0	1	1	0	1	18	17	6	11	4	3	8	4	4	16	5	11	9	2	7	8	1	7	81.82	5.67	19	0	0
23	Quintana Roo	2	Felipe Carrillo Puerto	419	Rancho Grande	880608	191223	30	7	*	*	*	*	*	*	*	*	*	*	*	*	*	*	*	*	*	*	*	*	*	*	*	*	*	*	*	*	*	*	*	*	*	*	*	*	*	*	*	*
23	Quintana Roo	2	Felipe Carrillo Puerto	420	Reforma Agraria	880708	191152	30	265	136	129	48	28	20	114	58	56	7	215	106	109	44	59	27	32	15	164	149	76	73	60	64	138	67	71	133	71	62	11	9	2	8	7	1	105.43	2.96	206	8	4
23	Quintana Roo	2	Felipe Carrillo Puerto	423	San Felipe	880420	192839	25	8	*	*	*	*	*	*	*	*	*	*	*	*	*	*	*	*	*	*	*	*	*	*	*	*	*	*	*	*	*	*	*	*	*	*	*	*	*	*	*	*
23	Quintana Roo	2	Felipe Carrillo Puerto	428	San Pablo	874156	200002	15	5	*	*	*	*	*	*	*	*	*	*	*	*	*	*	*	*	*	*	*	*	*	*	*	*	*	*	*	*	*	*	*	*	*	*	*	*	*	*	*	*
23	Quintana Roo	2	Felipe Carrillo Puerto	432	Santa Isabel	880556	192809	25	43	25	18	6	4	2	21	12	9	1	37	21	16	6	14	8	6	8	30	22	13	9	6	8	19	10	9	20	12	8	3	3	0	1	1	0	138.89	4.64	37	0	0
23	Quintana Roo	2	Felipe Carrillo Puerto	433	Santa Lucía	880426	194040	30	2	*	*	*	*	*	*	*	*	*	*	*	*	*	*	*	*	*	*	*	*	*	*	*	*	*	*	*	*	*	*	*	*	*	*	*	*	*	*	*	*
23	Quintana Roo	2	Felipe Carrillo Puerto	445	Yodzonot Nuevo	881720	194706	30	90	49	41	8	3	5	27	12	15	0	82	46	36	13	19	9	10	6	69	63	37	26	29	20	57	33	24	55	35	20	6	4	2	5	3	2	119.51	3.62	82	0	0
23	Quintana Roo	2	Felipe Carrillo Puerto	447	Kancab Chén	875044	195237	30	9	*	*	*	*	*	*	*	*	*	*	*	*	*	*	*	*	*	*	*	*	*	*	*	*	*	*	*	*	*	*	*	*	*	*	*	*	*	*	*	*
23	Quintana Roo	2	Felipe Carrillo Puerto	456	Punta Herrero	872745	191915	5	14	12	2	0	0	0	0	0	0	0	14	12	2	0	0	0	0	0	14	14	12	2	2	2	13	11	2	14	12	2	1	1	0	1	1	0	600	3	14	0	0
23	Quintana Roo	2	Felipe Carrillo Puerto	462	Las Sardinas	872743	191741	5	1	*	*	*	*	*	*	*	*	*	*	*	*	*	*	*	*	*	*	*	*	*	*	*	*	*	*	*	*	*	*	*	*	*	*	*	*	*	*	*	*
23	Quintana Roo	2	Felipe Carrillo Puerto	481	Anexa Santa Fe Segundo	880440	193529	30	5	*	*	*	*	*	*	*	*	*	*	*	*	*	*	*	*	*	*	*	*	*	*	*	*	*	*	*	*	*	*	*	*	*	*	*	*	*	*	*	*
23	Quintana Roo	2	Felipe Carrillo Puerto	490	Buena Fe	881749	200036	30	1	*	*	*	*	*	*	*	*	*	*	*	*	*	*	*	*	*	*	*	*	*	*	*	*	*	*	*	*	*	*	*	*	*	*	*	*	*	*	*	*
23	Quintana Roo	2	Felipe Carrillo Puerto	494	San José Café	882444	200545	30	5	*	*	*	*	*	*	*	*	*	*	*	*	*	*	*	*	*	*	*	*	*	*	*	*	*	*	*	*	*	*	*	*	*	*	*	*	*	*	*	*
23	Quintana Roo	2	Felipe Carrillo Puerto	520	Chanchén	875120	195300	30	13	6	7	3	1	2	4	1	3	0	10	5	5	1	1	0	1	0	9	9	5	4	4	3	8	4	4	9	5	4	1	1	0	0	0	0	85.71	3.75	10	0	0
23	Quintana Roo	2	Felipe Carrillo Puerto	521	Dzap Tun	875456	195614	20	9	*	*	*	*	*	*	*	*	*	*	*	*	*	*	*	*	*	*	*	*	*	*	*	*	*	*	*	*	*	*	*	*	*	*	*	*	*	*	*	*
23	Quintana Roo	2	Felipe Carrillo Puerto	526	Chapas	880443	193521	30	1	*	*	*	*	*	*	*	*	*	*	*	*	*	*	*	*	*	*	*	*	*	*	*	*	*	*	*	*	*	*	*	*	*	*	*	*	*	*	*	*
23	Quintana Roo	2	Felipe Carrillo Puerto	532	Chun Akidz	882642	192230	30	17	8	9	4	1	3	8	4	4	1	12	6	6	2	3	3	0	1	9	8	3	5	5	5	7	2	5	6	3	3	1	1	0	0	0	0	88.89	4.4	12	0	0
23	Quintana Roo	2	Felipe Carrillo Puerto	534	Chunhuás	873734	200532	10	3	*	*	*	*	*	*	*	*	*	*	*	*	*	*	*	*	*	*	*	*	*	*	*	*	*	*	*	*	*	*	*	*	*	*	*	*	*	*	*	*
23	Quintana Roo	2	Felipe Carrillo Puerto	535	Chun-Yah	875533	200606	15	699	367	332	134	70	64	356	187	169	25	565	297	268	137	197	103	94	60	403	343	180	163	141	147	318	164	154	292	158	134	25	16	9	15	10	5	110.54	3.72	560	0	0
23	Quintana Roo	2	Felipe Carrillo Puerto	536	Chunyaxché	873650	200441	10	154	91	63	27	17	10	81	52	29	6	122	72	50	32	48	32	16	16	84	68	37	31	26	26	61	33	28	60	33	27	7	4	3	5	4	1	144.44	4.17	118	0	0
23	Quintana Roo	2	Felipe Carrillo Puerto	537	Yoactún	882058	201017	30	1	*	*	*	*	*	*	*	*	*	*	*	*	*	*	*	*	*	*	*	*	*	*	*	*	*	*	*	*	*	*	*	*	*	*	*	*	*	*	*	*
23	Quintana Roo	2	Felipe Carrillo Puerto	541	Dzitbalché	880517	201238	30	6	*	*	*	*	*	*	*	*	*	*	*	*	*	*	*	*	*	*	*	*	*	*	*	*	*	*	*	*	*	*	*	*	*	*	*	*	*	*	*	*
23	Quintana Roo	2	Felipe Carrillo Puerto	553	Santa Teresa	874845	194322	15	1	*	*	*	*	*	*	*	*	*	*	*	*	*	*	*	*	*	*	*	*	*	*	*	*	*	*	*	*	*	*	*	*	*	*	*	*	*	*	*	*
23	Quintana Roo	2	Felipe Carrillo Puerto	555	Filadelfia	881520	195830	20	4	*	*	*	*	*	*	*	*	*	*	*	*	*	*	*	*	*	*	*	*	*	*	*	*	*	*	*	*	*	*	*	*	*	*	*	*	*	*	*	*
23	Quintana Roo	2	Felipe Carrillo Puerto	556	Flor de Mayo	880632	201127	30	5	*	*	*	*	*	*	*	*	*	*	*	*	*	*	*	*	*	*	*	*	*	*	*	*	*	*	*	*	*	*	*	*	*	*	*	*	*	*	*	*
23	Quintana Roo	2	Felipe Carrillo Puerto	584	Kankabdzonot	875742	200816	15	98	50	48	25	12	13	55	24	31	2	73	38	35	16	28	11	17	12	55	43	26	17	22	17	42	25	17	34	19	15	1	1	0	1	1	0	104.17	3.08	72	0	0
23	Quintana Roo	2	Felipe Carrillo Puerto	587	Cecilio Chí (kilómetro Sesenta y Cuatro)	874013	200123	5	66	38	28	8	3	5	26	13	13	2	58	35	23	8	16	10	6	8	48	40	25	15	23	13	39	25	14	33	20	13	1	0	1	1	0	1	135.71	2.95	58	0	0
23	Quintana Roo	2	Felipe Carrillo Puerto	591	Los Lagartos	883148	191720	30	5	*	*	*	*	*	*	*	*	*	*	*	*	*	*	*	*	*	*	*	*	*	*	*	*	*	*	*	*	*	*	*	*	*	*	*	*	*	*	*	*
23	Quintana Roo	2	Felipe Carrillo Puerto	592	Laguna Ocom Primero	880715	192746	25	4	*	*	*	*	*	*	*	*	*	*	*	*	*	*	*	*	*	*	*	*	*	*	*	*	*	*	*	*	*	*	*	*	*	*	*	*	*	*	*	*
23	Quintana Roo	2	Felipe Carrillo Puerto	605	Mosquiteros	873053	191409	5	3	*	*	*	*	*	*	*	*	*	*	*	*	*	*	*	*	*	*	*	*	*	*	*	*	*	*	*	*	*	*	*	*	*	*	*	*	*	*	*	*
23	Quintana Roo	2	Felipe Carrillo Puerto	609	Naranjal	875203	195045	15	10	*	*	*	*	*	*	*	*	*	*	*	*	*	*	*	*	*	*	*	*	*	*	*	*	*	*	*	*	*	*	*	*	*	*	*	*	*	*	*	*
23	Quintana Roo	2	Felipe Carrillo Puerto	612	Nohkancab	875933	194848	20	40	18	22	4	2	2	19	8	11	1	36	16	20	11	14	6	8	3	24	21	10	11	9	10	19	9	10	16	8	8	2	1	1	0	0	0	81.82	3.17	35	0	0
23	Quintana Roo	2	Felipe Carrillo Puerto	617	Pixoy	875356	195844	20	1	*	*	*	*	*	*	*	*	*	*	*	*	*	*	*	*	*	*	*	*	*	*	*	*	*	*	*	*	*	*	*	*	*	*	*	*	*	*	*	*
23	Quintana Roo	2	Felipe Carrillo Puerto	620	Pucté	880453	192812	15	11	*	*	*	*	*	*	*	*	*	*	*	*	*	*	*	*	*	*	*	*	*	*	*	*	*	*	*	*	*	*	*	*	*	*	*	*	*	*	*	*
23	Quintana Roo	2	Felipe Carrillo Puerto	626	Kilómetro Dos	880306	193540	30	3	*	*	*	*	*	*	*	*	*	*	*	*	*	*	*	*	*	*	*	*	*	*	*	*	*	*	*	*	*	*	*	*	*	*	*	*	*	*	*	*
23	Quintana Roo	2	Felipe Carrillo Puerto	630	El Ramonal	873328	194942	10	2	*	*	*	*	*	*	*	*	*	*	*	*	*	*	*	*	*	*	*	*	*	*	*	*	*	*	*	*	*	*	*	*	*	*	*	*	*	*	*	*
23	Quintana Roo	2	Felipe Carrillo Puerto	635	Rancho Chico	880725	192735	15	6	*	*	*	*	*	*	*	*	*	*	*	*	*	*	*	*	*	*	*	*	*	*	*	*	*	*	*	*	*	*	*	*	*	*	*	*	*	*	*	*
23	Quintana Roo	2	Felipe Carrillo Puerto	637	Centauro	880551	191706	25	11	*	*	*	*	*	*	*	*	*	*	*	*	*	*	*	*	*	*	*	*	*	*	*	*	*	*	*	*	*	*	*	*	*	*	*	*	*	*	*	*
23	Quintana Roo	2	Felipe Carrillo Puerto	641	San Martín	882224	192924	25	7	*	*	*	*	*	*	*	*	*	*	*	*	*	*	*	*	*	*	*	*	*	*	*	*	*	*	*	*	*	*	*	*	*	*	*	*	*	*	*	*
23	Quintana Roo	2	Felipe Carrillo Puerto	648	Sahcabchén	875549	201016	15	40	20	20	4	3	1	18	9	9	1	36	17	19	8	13	6	7	5	27	22	11	11	4	8	21	11	10	21	11	10	1	0	1	1	0	1	100	2.81	36	0	0
23	Quintana Roo	2	Felipe Carrillo Puerto	649	Sahcabchén	874857	195453	30	12	*	*	*	*	*	*	*	*	*	*	*	*	*	*	*	*	*	*	*	*	*	*	*	*	*	*	*	*	*	*	*	*	*	*	*	*	*	*	*	*
23	Quintana Roo	2	Felipe Carrillo Puerto	652	San Andrés	880422	194021	30	2	*	*	*	*	*	*	*	*	*	*	*	*	*	*	*	*	*	*	*	*	*	*	*	*	*	*	*	*	*	*	*	*	*	*	*	*	*	*	*	*
23	Quintana Roo	2	Felipe Carrillo Puerto	657	San Antonio Segundo	880003	195336	20	52	25	27	7	3	4	18	10	8	1	45	22	23	7	10	7	3	3	37	34	15	19	7	14	28	13	15	32	14	18	6	2	4	2	1	1	92.59	3.25	45	0	0
23	Quintana Roo	2	Felipe Carrillo Puerto	658	San Antonio Nuevo	875814	200832	15	59	33	26	13	7	6	37	21	16	3	46	26	20	16	21	12	9	5	27	22	12	10	4	8	21	11	10	20	10	10	1	1	0	0	0	0	126.92	4.5	46	0	0
23	Quintana Roo	2	Felipe Carrillo Puerto	666	San Diego	881522	192119	30	14	8	6	0	0	0	3	3	0	0	13	8	5	0	3	3	0	3	13	10	5	5	5	3	7	4	3	7	4	3	3	1	2	3	1	2	133.33	3.2	13	0	0
23	Quintana Roo	2	Felipe Carrillo Puerto	681	San Jorge	882353	192254	30	6	*	*	*	*	*	*	*	*	*	*	*	*	*	*	*	*	*	*	*	*	*	*	*	*	*	*	*	*	*	*	*	*	*	*	*	*	*	*	*	*
23	Quintana Roo	2	Felipe Carrillo Puerto	691	San Miguel	880524	193540	30	7	*	*	*	*	*	*	*	*	*	*	*	*	*	*	*	*	*	*	*	*	*	*	*	*	*	*	*	*	*	*	*	*	*	*	*	*	*	*	*	*
23	Quintana Roo	2	Felipe Carrillo Puerto	701	San Pedro	882435	192335	30	9	*	*	*	*	*	*	*	*	*	*	*	*	*	*	*	*	*	*	*	*	*	*	*	*	*	*	*	*	*	*	*	*	*	*	*	*	*	*	*	*
23	Quintana Roo	2	Felipe Carrillo Puerto	707	Santa Amalia	875147	194553	30	56	31	25	9	7	2	25	14	11	1	47	24	23	11	15	7	8	4	35	31	17	14	12	11	28	15	13	24	13	11	3	2	1	2	1	1	124	4.31	47	0	0
23	Quintana Roo	2	Felipe Carrillo Puerto	731	X-huazil	880016	201320	30	5	*	*	*	*	*	*	*	*	*	*	*	*	*	*	*	*	*	*	*	*	*	*	*	*	*	*	*	*	*	*	*	*	*	*	*	*	*	*	*	*
23	Quintana Roo	2	Felipe Carrillo Puerto	738	Tres Reyes	875138	195009	30	65	35	30	6	2	4	24	14	10	1	59	33	26	14	17	11	6	3	44	41	21	20	15	16	37	18	19	33	18	15	4	3	1	2	1	1	116.67	3.67	59	0	0
23	Quintana Roo	2	Felipe Carrillo Puerto	740	Tuzik	880049	201136	30	23	13	10	1	0	1	7	4	3	1	22	13	9	3	5	3	2	2	18	16	9	7	8	5	15	9	6	14	8	6	1	0	1	1	0	1	130	3.75	21	0	0
23	Quintana Roo	2	Felipe Carrillo Puerto	768	X-Hazil Norte	875857	201254	30	147	78	69	26	17	9	82	44	38	4	121	61	60	34	52	25	27	18	83	65	34	31	26	29	63	33	30	54	28	26	2	1	1	2	1	1	113.04	3.19	119	2	0
23	Quintana Roo	2	Felipe Carrillo Puerto	835	Seis de Enero	883341	192217	30	1	*	*	*	*	*	*	*	*	*	*	*	*	*	*	*	*	*	*	*	*	*	*	*	*	*	*	*	*	*	*	*	*	*	*	*	*	*	*	*	*
23	Quintana Roo	2	Felipe Carrillo Puerto	840	Kenia Nairovi	880558	191526	20	11	*	*	*	*	*	*	*	*	*	*	*	*	*	*	*	*	*	*	*	*	*	*	*	*	*	*	*	*	*	*	*	*	*	*	*	*	*	*	*	*
23	Quintana Roo	2	Felipe Carrillo Puerto	847	Flor de Jazmín	881826	191909	30	1	*	*	*	*	*	*	*	*	*	*	*	*	*	*	*	*	*	*	*	*	*	*	*	*	*	*	*	*	*	*	*	*	*	*	*	*	*	*	*	*
23	Quintana Roo	2	Felipe Carrillo Puerto	865	Lázaro Cárdenas	880137	193503	30	9	*	*	*	*	*	*	*	*	*	*	*	*	*	*	*	*	*	*	*	*	*	*	*	*	*	*	*	*	*	*	*	*	*	*	*	*	*	*	*	*
23	Quintana Roo	2	Felipe Carrillo Puerto	869	Tzukum	880900	194505	20	39	23	16	6	4	2	20	12	8	3	33	19	14	8	11	7	4	3	22	19	11	8	4	6	16	9	7	18	10	8	3	2	1	3	2	1	143.75	5.38	33	0	0
23	Quintana Roo	2	Felipe Carrillo Puerto	878	El Vergel	883345	192240	30	2	*	*	*	*	*	*	*	*	*	*	*	*	*	*	*	*	*	*	*	*	*	*	*	*	*	*	*	*	*	*	*	*	*	*	*	*	*	*	*	*
23	Quintana Roo	2	Felipe Carrillo Puerto	879	El Girasol	882800	191806	30	1	*	*	*	*	*	*	*	*	*	*	*	*	*	*	*	*	*	*	*	*	*	*	*	*	*	*	*	*	*	*	*	*	*	*	*	*	*	*	*	*
23	Quintana Roo	2	Felipe Carrillo Puerto	903	X-Café	880057	201153	30	2	*	*	*	*	*	*	*	*	*	*	*	*	*	*	*	*	*	*	*	*	*	*	*	*	*	*	*	*	*	*	*	*	*	*	*	*	*	*	*	*
23	Quintana Roo	2	Felipe Carrillo Puerto	909	CERESO	880408	193518	30	33	*	*	*	*	*	*	*	*	*	*	*	*	*	*	*	*	*	*	*	*	*	*	*	*	*	*	*	*	*	*	*	*	*	*	*	*	*	*	*	*
23	Quintana Roo	2	Felipe Carrillo Puerto	911	Dzaptún	880430	201615	15	23	11	12	6	5	1	16	7	9	0	17	6	11	5	10	2	8	5	12	7	4	3	1	3	6	3	3	6	3	3	1	1	0	1	1	0	91.67	2.43	17	0	0
23	Quintana Roo	2	Felipe Carrillo Puerto	915	El Girasol	883335	191910	30	2	*	*	*	*	*	*	*	*	*	*	*	*	*	*	*	*	*	*	*	*	*	*	*	*	*	*	*	*	*	*	*	*	*	*	*	*	*	*	*	*
23	Quintana Roo	2	Felipe Carrillo Puerto	922	San Pedro	873302	190742	5	3	*	*	*	*	*	*	*	*	*	*	*	*	*	*	*	*	*	*	*	*	*	*	*	*	*	*	*	*	*	*	*	*	*	*	*	*	*	*	*	*
23	Quintana Roo	2	Felipe Carrillo Puerto	933	Localidad sin Nombre	883445	192706	30	7	5	2	0	0	0	0	0	0	0	7	5	2	0	0	0	0	0	7	7	5	2	0	2	6	4	2	7	5	2	1	1	0	1	1	0	250	4	7	0	0
23	Quintana Roo	2	Felipe Carrillo Puerto	941	Kilómetro Treinta y Uno	875227	194852	15	10	*	*	*	*	*	*	*	*	*	*	*	*	*	*	*	*	*	*	*	*	*	*	*	*	*	*	*	*	*	*	*	*	*	*	*	*	*	*	*	*
23	Quintana Roo	2	Felipe Carrillo Puerto	944	Los Laureles	882153	194510	40	7	*	*	*	*	*	*	*	*	*	*	*	*	*	*	*	*	*	*	*	*	*	*	*	*	*	*	*	*	*	*	*	*	*	*	*	*	*	*	*	*
23	Quintana Roo	2	Felipe Carrillo Puerto	955	Cedralito	880900	192510	25	1	*	*	*	*	*	*	*	*	*	*	*	*	*	*	*	*	*	*	*	*	*	*	*	*	*	*	*	*	*	*	*	*	*	*	*	*	*	*	*	*
23	Quintana Roo	2	Felipe Carrillo Puerto	962	San Antonio	880449	192830	20	6	*	*	*	*	*	*	*	*	*	*	*	*	*	*	*	*	*	*	*	*	*	*	*	*	*	*	*	*	*	*	*	*	*	*	*	*	*	*	*	*
23	Quintana Roo	2	Felipe Carrillo Puerto	978	X-hazil Primero	875933	201017	15	35	19	16	8	6	2	20	11	9	2	27	13	14	8	10	4	6	2	17	15	8	7	4	6	14	8	6	14	7	7	1	0	1	1	0	1	118.75	3.88	27	0	0
23	Quintana Roo	2	Felipe Carrillo Puerto	992	Flor de Mayo	880642	200934	25	8	*	*	*	*	*	*	*	*	*	*	*	*	*	*	*	*	*	*	*	*	*	*	*	*	*	*	*	*	*	*	*	*	*	*	*	*	*	*	*	*
23	Quintana Roo	2	Felipe Carrillo Puerto	993	Las Palomas	880610	192539	25	3	*	*	*	*	*	*	*	*	*	*	*	*	*	*	*	*	*	*	*	*	*	*	*	*	*	*	*	*	*	*	*	*	*	*	*	*	*	*	*	*
23	Quintana Roo	2	Felipe Carrillo Puerto	1008	Paraíso	880604	191348	30	2	*	*	*	*	*	*	*	*	*	*	*	*	*	*	*	*	*	*	*	*	*	*	*	*	*	*	*	*	*	*	*	*	*	*	*	*	*	*	*	*
23	Quintana Roo	2	Felipe Carrillo Puerto	1011	Chunhuhub	883552	193522	40	20	10	10	0	0	0	5	0	5	0	20	10	10	2	5	0	5	3	18	15	10	5	7	5	13	8	5	13	9	4	2	2	0	1	1	0	100	1.14	20	0	0
23	Quintana Roo	2	Felipe Carrillo Puerto	1014	Chunhuhub	883602	193502	40	44	22	22	5	3	2	16	8	8	1	39	19	20	6	10	4	6	4	32	28	14	14	13	12	26	13	13	24	14	10	2	1	1	2	1	1	100	3.33	39	0	0
23	Quintana Roo	2	Felipe Carrillo Puerto	1017	Localidad sin Nombre	882245	201112	30	7	*	*	*	*	*	*	*	*	*	*	*	*	*	*	*	*	*	*	*	*	*	*	*	*	*	*	*	*	*	*	*	*	*	*	*	*	*	*	*	*
23	Quintana Roo	2	Felipe Carrillo Puerto	1018	Localidad sin Nombre	882240	201112	30	5	*	*	*	*	*	*	*	*	*	*	*	*	*	*	*	*	*	*	*	*	*	*	*	*	*	*	*	*	*	*	*	*	*	*	*	*	*	*	*	*
23	Quintana Roo	2	Felipe Carrillo Puerto	1025	Tihosuco	882207	201207	30	3	*	*	*	*	*	*	*	*	*	*	*	*	*	*	*	*	*	*	*	*	*	*	*	*	*	*	*	*	*	*	*	*	*	*	*	*	*	*	*	*
23	Quintana Roo	2	Felipe Carrillo Puerto	1026	San José	880616	190843	30	8	*	*	*	*	*	*	*	*	*	*	*	*	*	*	*	*	*	*	*	*	*	*	*	*	*	*	*	*	*	*	*	*	*	*	*	*	*	*	*	*
23	Quintana Roo	2	Felipe Carrillo Puerto	1027	Chan Dzonot	882115	201131	40	2	*	*	*	*	*	*	*	*	*	*	*	*	*	*	*	*	*	*	*	*	*	*	*	*	*	*	*	*	*	*	*	*	*	*	*	*	*	*	*	*
23	Quintana Roo	2	Felipe Carrillo Puerto	1033	Naranjal Dos	873918	200220	10	1	*	*	*	*	*	*	*	*	*	*	*	*	*	*	*	*	*	*	*	*	*	*	*	*	*	*	*	*	*	*	*	*	*	*	*	*	*	*	*	*
23	Quintana Roo	2	Felipe Carrillo Puerto	1041	El Faisán y el Venado	875120	195128	30	10	*	*	*	*	*	*	*	*	*	*	*	*	*	*	*	*	*	*	*	*	*	*	*	*	*	*	*	*	*	*	*	*	*	*	*	*	*	*	*	*
23	Quintana Roo	2	Felipe Carrillo Puerto	1043	Balam Nah	880403	192835	25	1	*	*	*	*	*	*	*	*	*	*	*	*	*	*	*	*	*	*	*	*	*	*	*	*	*	*	*	*	*	*	*	*	*	*	*	*	*	*	*	*
23	Quintana Roo	2	Felipe Carrillo Puerto	1044	Sahcabchén	874847	195513	30	11	*	*	*	*	*	*	*	*	*	*	*	*	*	*	*	*	*	*	*	*	*	*	*	*	*	*	*	*	*	*	*	*	*	*	*	*	*	*	*	*
23	Quintana Roo	2	Felipe Carrillo Puerto	1046	Yodzonot	875536	195956	20	9	*	*	*	*	*	*	*	*	*	*	*	*	*	*	*	*	*	*	*	*	*	*	*	*	*	*	*	*	*	*	*	*	*	*	*	*	*	*	*	*
23	Quintana Roo	2	Felipe Carrillo Puerto	1047	Panabá	874350	202109	15	5	*	*	*	*	*	*	*	*	*	*	*	*	*	*	*	*	*	*	*	*	*	*	*	*	*	*	*	*	*	*	*	*	*	*	*	*	*	*	*	*
23	Quintana Roo	2	Felipe Carrillo Puerto	1048	Las Bugambilias	880029	193548	30	1	*	*	*	*	*	*	*	*	*	*	*	*	*	*	*	*	*	*	*	*	*	*	*	*	*	*	*	*	*	*	*	*	*	*	*	*	*	*	*	*
23	Quintana Roo	2	Felipe Carrillo Puerto	9998	Localidades de una vivienda				289	177	112	18	8	10	79	44	35	8	266	167	99	32	53	31	22	21	226	205	131	74	57	56	171	110	61	178	115	63	34	21	13	27	17	10	158.04	3.25	258	8	5
23	Quintana Roo	2	Felipe Carrillo Puerto	9999	Localidades de dos viviendas				70	39	31	4	4	0	19	11	8	2	66	35	31	9	13	7	6	4	55	51	28	23	12	15	37	21	16	44	25	19	14	7	7	11	7	4	125.81	4.19	66	0	0
23	Quintana Roo	3	Isla Mujeres	0	Total del Municipio				13315	6865	6450	1087	568	519	3252	1653	1599	229	9729	5046	4683	1304	1936	963	973	632	8196	7564	3961	3603	2165	2989	6976	3638	3338	6926	3646	3280	588	323	265	353	190	163	106.43	2.36	8885	711	376
23	Quintana Roo	3	Isla Mujeres	1	Isla Mujeres	864546	211408	5	11147	5707	5440	896	468	428	2717	1376	1341	191	8302	4262	4040	1099	1630	803	827	531	7012	6481	3354	3127	1838	2603	5998	3105	2893	5937	3084	2853	483	249	234	299	152	147	104.91	2.33	7679	505	265
23	Quintana Roo	3	Isla Mujeres	44	Punta Sur	864248	211210	5	22	12	10	0	0	0	1	1	0	0	18	10	8	1	1	1	0	0	17	17	9	8	2	3	9	4	5	17	9	8	8	5	3	5	3	2	120	2.4	14	1	0
23	Quintana Roo	3	Isla Mujeres	54	Chacmuchuch	865205	211650	10	3	*	*	*	*	*	*	*	*	*	*	*	*	*	*	*	*	*	*	*	*	*	*	*	*	*	*	*	*	*	*	*	*	*	*	*	*	*	*	*	*
23	Quintana Roo	3	Isla Mujeres	58	El Garrafón	864307	211220	10	4	*	*	*	*	*	*	*	*	*	*	*	*	*	*	*	*	*	*	*	*	*	*	*	*	*	*	*	*	*	*	*	*	*	*	*	*	*	*	*	*
23	Quintana Roo	3	Isla Mujeres	60	Playa Indios	864329	211248	5	16	6	10	2	0	2	4	1	3	1	14	6	8	1	1	0	1	0	12	12	5	7	5	6	11	5	6	11	5	6	1	0	1	0	0	0	60	1.29	13	1	0
23	Quintana Roo	3	Isla Mujeres	64	Lancheros	864343	211304	5	2	*	*	*	*	*	*	*	*	*	*	*	*	*	*	*	*	*	*	*	*	*	*	*	*	*	*	*	*	*	*	*	*	*	*	*	*	*	*	*	*
23	Quintana Roo	3	Isla Mujeres	70	Sac-Bajo	864433	211411	5	53	28	25	4	1	3	13	5	8	0	30	17	13	6	9	4	5	3	24	21	13	8	4	8	20	12	8	18	11	7	1	1	0	0	0	0	112	1.78	27	3	3
23	Quintana Roo	3	Isla Mujeres	76	Sueño Guajiro	865247	211634	10	3	*	*	*	*	*	*	*	*	*	*	*	*	*	*	*	*	*	*	*	*	*	*	*	*	*	*	*	*	*	*	*	*	*	*	*	*	*	*	*	*
23	Quintana Roo	3	Isla Mujeres	77	Sufre y Calla	865138	211425	10	8	*	*	*	*	*	*	*	*	*	*	*	*	*	*	*	*	*	*	*	*	*	*	*	*	*	*	*	*	*	*	*	*	*	*	*	*	*	*	*	*
23	Quintana Roo	3	Isla Mujeres	78	El Cerrito	865136	211408	10	4	*	*	*	*	*	*	*	*	*	*	*	*	*	*	*	*	*	*	*	*	*	*	*	*	*	*	*	*	*	*	*	*	*	*	*	*	*	*	*	*
23	Quintana Roo	3	Isla Mujeres	86	Cristo Rey	865050	211252	10	5	*	*	*	*	*	*	*	*	*	*	*	*	*	*	*	*	*	*	*	*	*	*	*	*	*	*	*	*	*	*	*	*	*	*	*	*	*	*	*	*
23	Quintana Roo	3	Isla Mujeres	87	Flamingos	864809	211312	5	10	8	2	4	3	1	4	3	1	0	6	5	1	0	0	0	0	0	6	6	5	1	3	1	6	5	1	6	5	1	0	0	0	0	0	0	400	2	0	6	5
23	Quintana Roo	3	Isla Mujeres	89	La Noria	865130	211354	10	20	9	11	4	3	1	12	7	5	1	16	6	10	6	7	3	4	1	9	8	2	6	5	6	8	2	6	7	2	5	0	0	0	0	0	0	81.82	1.33	16	0	0
23	Quintana Roo	3	Isla Mujeres	91	La Proa	864809	211332	10	5	*	*	*	*	*	*	*	*	*	*	*	*	*	*	*	*	*	*	*	*	*	*	*	*	*	*	*	*	*	*	*	*	*	*	*	*	*	*	*	*
23	Quintana Roo	3	Isla Mujeres	92	Punta Sam	864805	211358	10	117	58	59	4	1	3	13	5	8	0	51	26	25	5	9	4	5	4	46	42	22	20	7	15	35	15	20	40	22	18	7	7	0	1	1	0	98.31	1.55	45	6	3
23	Quintana Roo	3	Isla Mujeres	93	Rancho Viejo	865447	211523	10	4	*	*	*	*	*	*	*	*	*	*	*	*	*	*	*	*	*	*	*	*	*	*	*	*	*	*	*	*	*	*	*	*	*	*	*	*	*	*	*	*
23	Quintana Roo	3	Isla Mujeres	95	El Meco	864813	211244	5	19	9	10	1	0	1	4	3	1	1	18	9	9	1	2	2	0	1	16	15	6	9	3	5	14	5	9	15	6	9	1	1	0	0	0	0	90	2.11	15	3	2
23	Quintana Roo	3	Isla Mujeres	103	Isla Blanca	864839	212437	5	12	9	3	0	0	0	0	0	0	0	12	9	3	0	0	0	0	0	12	12	9	3	5	1	12	9	3	9	7	2	0	0	0	0	0	0	300	3	11	1	1
23	Quintana Roo	3	Isla Mujeres	118	Boca Iglesia	865821	213209	1	26	17	9	1	0	1	3	1	2	1	25	17	8	0	1	1	0	1	24	23	16	7	4	5	20	14	6	23	16	7	3	2	1	2	1	1	188.89	4	24	0	0
23	Quintana Roo	3	Isla Mujeres	122	Boca Nueva	870045	213426	1	2	*	*	*	*	*	*	*	*	*	*	*	*	*	*	*	*	*	*	*	*	*	*	*	*	*	*	*	*	*	*	*	*	*	*	*	*	*	*	*	*
23	Quintana Roo	3	Isla Mujeres	128	Francisco Javier	864744	211952	5	3	*	*	*	*	*	*	*	*	*	*	*	*	*	*	*	*	*	*	*	*	*	*	*	*	*	*	*	*	*	*	*	*	*	*	*	*	*	*	*	*
23	Quintana Roo	3	Isla Mujeres	129	Kart	864814	211901	5	8	5	3	0	0	0	0	0	0	0	4	3	1	0	0	0	0	0	4	4	3	1	0	0	2	2	0	4	3	1	2	1	1	0	0	0	166.67	3	4	0	0
23	Quintana Roo	3	Isla Mujeres	140	San Manuel	865042	211249	10	9	*	*	*	*	*	*	*	*	*	*	*	*	*	*	*	*	*	*	*	*	*	*	*	*	*	*	*	*	*	*	*	*	*	*	*	*	*	*	*	*
23	Quintana Roo	3	Isla Mujeres	148	Siete Hermanos	865047	211256	10	2	*	*	*	*	*	*	*	*	*	*	*	*	*	*	*	*	*	*	*	*	*	*	*	*	*	*	*	*	*	*	*	*	*	*	*	*	*	*	*	*
23	Quintana Roo	3	Isla Mujeres	149	San Isidro	865037	211242	10	5	*	*	*	*	*	*	*	*	*	*	*	*	*	*	*	*	*	*	*	*	*	*	*	*	*	*	*	*	*	*	*	*	*	*	*	*	*	*	*	*
23	Quintana Roo	3	Isla Mujeres	152	La Estrella	865101	211309	10	6	*	*	*	*	*	*	*	*	*	*	*	*	*	*	*	*	*	*	*	*	*	*	*	*	*	*	*	*	*	*	*	*	*	*	*	*	*	*	*	*
23	Quintana Roo	3	Isla Mujeres	156	Santa Fe	865133	211416	10	10	*	*	*	*	*	*	*	*	*	*	*	*	*	*	*	*	*	*	*	*	*	*	*	*	*	*	*	*	*	*	*	*	*	*	*	*	*	*	*	*
23	Quintana Roo	3	Isla Mujeres	164	Ebén Ezer	865301	211434	10	11	*	*	*	*	*	*	*	*	*	*	*	*	*	*	*	*	*	*	*	*	*	*	*	*	*	*	*	*	*	*	*	*	*	*	*	*	*	*	*	*
23	Quintana Roo	3	Isla Mujeres	172	El Abuelo	865230	211427	10	5	*	*	*	*	*	*	*	*	*	*	*	*	*	*	*	*	*	*	*	*	*	*	*	*	*	*	*	*	*	*	*	*	*	*	*	*	*	*	*	*
23	Quintana Roo	3	Isla Mujeres	173	La Estrella	865227	211425	10	4	*	*	*	*	*	*	*	*	*	*	*	*	*	*	*	*	*	*	*	*	*	*	*	*	*	*	*	*	*	*	*	*	*	*	*	*	*	*	*	*
23	Quintana Roo	3	Isla Mujeres	191	Hacienda Punta Sam	864807	211305	5	13	6	7	0	0	0	0	0	0	0	1	0	1	0	0	0	0	0	1	1	0	1	0	1	1	0	1	1	0	1	0	0	0	0	0	0	85.71	0	1	0	0
23	Quintana Roo	3	Isla Mujeres	193	Playa Azul	864807	211259	5	17	9	8	1	0	1	2	1	1	0	12	7	5	0	1	1	0	1	12	11	6	5	5	4	10	5	5	9	6	3	1	1	0	0	0	0	112.5	2	3	9	5
23	Quintana Roo	3	Isla Mujeres	209	Playa Gaviota	864336	211256	5	5	*	*	*	*	*	*	*	*	*	*	*	*	*	*	*	*	*	*	*	*	*	*	*	*	*	*	*	*	*	*	*	*	*	*	*	*	*	*	*	*
23	Quintana Roo	3	Isla Mujeres	211	Idar de la Parra	864332	211252	5	2	*	*	*	*	*	*	*	*	*	*	*	*	*	*	*	*	*	*	*	*	*	*	*	*	*	*	*	*	*	*	*	*	*	*	*	*	*	*	*	*
23	Quintana Roo	3	Isla Mujeres	215	María's Kankín	864321	211239	5	1	*	*	*	*	*	*	*	*	*	*	*	*	*	*	*	*	*	*	*	*	*	*	*	*	*	*	*	*	*	*	*	*	*	*	*	*	*	*	*	*
23	Quintana Roo	3	Isla Mujeres	219	Garrafón de Castilla	864310	211223	5	5	*	*	*	*	*	*	*	*	*	*	*	*	*	*	*	*	*	*	*	*	*	*	*	*	*	*	*	*	*	*	*	*	*	*	*	*	*	*	*	*
23	Quintana Roo	3	Isla Mujeres	221	Mar Turquesa	864309	211227	5	29	15	14	0	0	0	8	4	4	0	28	15	13	6	8	4	4	2	22	20	11	9	4	7	19	10	9	17	10	7	1	1	0	0	0	0	107.14	1.1	22	6	2
23	Quintana Roo	3	Isla Mujeres	222	Kilómetro Cinco Punto Cinco	864317	211237	5	12	5	7	0	0	0	3	0	3	0	12	5	7	2	3	0	3	1	10	9	5	4	0	3	7	4	3	9	5	4	2	1	1	2	1	1	71.43	3.25	12	0	0
23	Quintana Roo	3	Isla Mujeres	225	Mundaca	864337	211304	5	6	4	2	0	0	0	1	1	0	0	6	4	2	0	1	1	0	1	6	5	3	2	2	2	3	1	2	4	3	1	2	2	0	1	1	0	200	4	6	0	0
23	Quintana Roo	3	Isla Mujeres	227	San Francisco	865338	211454	10	4	*	*	*	*	*	*	*	*	*	*	*	*	*	*	*	*	*	*	*	*	*	*	*	*	*	*	*	*	*	*	*	*	*	*	*	*	*	*	*	*
23	Quintana Roo	3	Isla Mujeres	234	Los Rosales	865122	211340	10	58	31	27	3	1	2	11	6	5	1	35	20	15	4	7	4	3	3	30	27	15	12	10	10	25	14	11	21	11	10	2	1	1	0	0	0	114.81	3.15	33	2	0
23	Quintana Roo	3	Isla Mujeres	249	Casa Blanca	864742	211957	5	1	*	*	*	*	*	*	*	*	*	*	*	*	*	*	*	*	*	*	*	*	*	*	*	*	*	*	*	*	*	*	*	*	*	*	*	*	*	*	*	*
23	Quintana Roo	3	Isla Mujeres	251	San Tacumario	865101	211317	10	23	10	13	3	0	3	12	6	6	1	20	10	10	7	8	5	3	1	12	11	4	7	3	7	11	4	7	9	3	6	0	0	0	0	0	0	76.92	0.43	20	0	0
23	Quintana Roo	3	Isla Mujeres	252	Las Dos Glorias	864811	211916	5	4	*	*	*	*	*	*	*	*	*	*	*	*	*	*	*	*	*	*	*	*	*	*	*	*	*	*	*	*	*	*	*	*	*	*	*	*	*	*	*	*
23	Quintana Roo	3	Isla Mujeres	258	Bonsai	865058	211351	10	11	10	1	2	2	0	3	3	0	1	9	8	1	0	0	0	0	0	8	8	7	1	2	1	7	6	1	7	6	1	1	1	0	1	1	0	1000	3	2	7	6
23	Quintana Roo	3	Isla Mujeres	259	San Martín (Niño Jesús)	865100	211305	10	6	*	*	*	*	*	*	*	*	*	*	*	*	*	*	*	*	*	*	*	*	*	*	*	*	*	*	*	*	*	*	*	*	*	*	*	*	*	*	*	*
23	Quintana Roo	3	Isla Mujeres	260	El Corzo	865134	211502	10	1	*	*	*	*	*	*	*	*	*	*	*	*	*	*	*	*	*	*	*	*	*	*	*	*	*	*	*	*	*	*	*	*	*	*	*	*	*	*	*	*
23	Quintana Roo	3	Isla Mujeres	261	Cuba Can	864807	211256	5	1	*	*	*	*	*	*	*	*	*	*	*	*	*	*	*	*	*	*	*	*	*	*	*	*	*	*	*	*	*	*	*	*	*	*	*	*	*	*	*	*
23	Quintana Roo	3	Isla Mujeres	266	San Pablo	865059	211314	10	27	14	13	2	2	0	8	5	3	1	25	12	13	3	5	3	2	2	21	19	9	10	7	9	16	7	9	18	9	9	3	2	1	1	1	0	107.69	2.45	14	10	3
23	Quintana Roo	3	Isla Mujeres	269	Las Gaviotas	865214	211418	10	1	*	*	*	*	*	*	*	*	*	*	*	*	*	*	*	*	*	*	*	*	*	*	*	*	*	*	*	*	*	*	*	*	*	*	*	*	*	*	*	*
23	Quintana Roo	3	Isla Mujeres	274	Herbert Quijano	865237	211426	10	1	*	*	*	*	*	*	*	*	*	*	*	*	*	*	*	*	*	*	*	*	*	*	*	*	*	*	*	*	*	*	*	*	*	*	*	*	*	*	*	*
23	Quintana Roo	3	Isla Mujeres	276	La Herradura	865041	211239	10	35	17	18	5	2	3	12	6	6	1	18	9	9	5	6	3	3	1	12	11	5	6	4	6	11	5	6	10	5	5	0	0	0	0	0	0	94.44	2.5	5	13	6
23	Quintana Roo	3	Isla Mujeres	277	El Último Suspiro	865042	211241	10	2	*	*	*	*	*	*	*	*	*	*	*	*	*	*	*	*	*	*	*	*	*	*	*	*	*	*	*	*	*	*	*	*	*	*	*	*	*	*	*	*
23	Quintana Roo	3	Isla Mujeres	279	Rancho Nuevo	865040	211246	10	5	*	*	*	*	*	*	*	*	*	*	*	*	*	*	*	*	*	*	*	*	*	*	*	*	*	*	*	*	*	*	*	*	*	*	*	*	*	*	*	*
23	Quintana Roo	3	Isla Mujeres	283	Localidad sin Nombre	865123	211350	10	10	*	*	*	*	*	*	*	*	*	*	*	*	*	*	*	*	*	*	*	*	*	*	*	*	*	*	*	*	*	*	*	*	*	*	*	*	*	*	*	*
23	Quintana Roo	3	Isla Mujeres	285	Los Laureles	865359	211501	10	2	*	*	*	*	*	*	*	*	*	*	*	*	*	*	*	*	*	*	*	*	*	*	*	*	*	*	*	*	*	*	*	*	*	*	*	*	*	*	*	*
23	Quintana Roo	3	Isla Mujeres	286	Zona Urbana Ejido Isla Mujeres	865113	211329	10	219	123	96	23	17	6	50	32	18	2	118	67	51	16	25	14	11	9	100	91	52	39	32	34	85	49	36	81	47	34	6	3	3	5	3	2	128.13	3.21	97	20	12
23	Quintana Roo	3	Isla Mujeres	289	Luis Barocio de la Lama	864809	211313	5	1	*	*	*	*	*	*	*	*	*	*	*	*	*	*	*	*	*	*	*	*	*	*	*	*	*	*	*	*	*	*	*	*	*	*	*	*	*	*	*	*
23	Quintana Roo	3	Isla Mujeres	290	Localidad sin Nombre	864808	211323	5	7	*	*	*	*	*	*	*	*	*	*	*	*	*	*	*	*	*	*	*	*	*	*	*	*	*	*	*	*	*	*	*	*	*	*	*	*	*	*	*	*
23	Quintana Roo	3	Isla Mujeres	292	Buena Vista	864320	211236	5	7	*	*	*	*	*	*	*	*	*	*	*	*	*	*	*	*	*	*	*	*	*	*	*	*	*	*	*	*	*	*	*	*	*	*	*	*	*	*	*	*
23	Quintana Roo	3	Isla Mujeres	298	Loma Isla Bonita	864325	211250	10	6	*	*	*	*	*	*	*	*	*	*	*	*	*	*	*	*	*	*	*	*	*	*	*	*	*	*	*	*	*	*	*	*	*	*	*	*	*	*	*	*
23	Quintana Roo	3	Isla Mujeres	300	Maracatu	864809	211331	5	7	4	3	0	0	0	0	0	0	0	3	2	1	0	0	0	0	0	3	3	2	1	0	0	2	1	1	3	2	1	1	1	0	0	0	0	133.33	2	3	0	0
23	Quintana Roo	3	Isla Mujeres	302	El Oasis	865053	211305	10	19	9	10	0	0	0	6	2	4	1	11	5	6	4	5	2	3	1	6	5	3	2	0	2	5	3	2	5	3	2	0	0	0	0	0	0	90	5	11	0	0
23	Quintana Roo	3	Isla Mujeres	304	Jorge Puerto	865044	211252	10	5	*	*	*	*	*	*	*	*	*	*	*	*	*	*	*	*	*	*	*	*	*	*	*	*	*	*	*	*	*	*	*	*	*	*	*	*	*	*	*	*
23	Quintana Roo	3	Isla Mujeres	306	La Mina	865141	211502	5	5	*	*	*	*	*	*	*	*	*	*	*	*	*	*	*	*	*	*	*	*	*	*	*	*	*	*	*	*	*	*	*	*	*	*	*	*	*	*	*	*
23	Quintana Roo	3	Isla Mujeres	307	Santa Fátima	864844	211822	5	3	*	*	*	*	*	*	*	*	*	*	*	*	*	*	*	*	*	*	*	*	*	*	*	*	*	*	*	*	*	*	*	*	*	*	*	*	*	*	*	*
23	Quintana Roo	3	Isla Mujeres	311	Dulce María	865056	211301	10	12	7	5	0	0	0	3	1	2	1	12	7	5	2	2	1	1	0	9	9	6	3	2	2	9	6	3	8	5	3	0	0	0	0	0	0	140	3.33	3	8	6
23	Quintana Roo	3	Isla Mujeres	313	San Valentín	865234	211427	10	7	*	*	*	*	*	*	*	*	*	*	*	*	*	*	*	*	*	*	*	*	*	*	*	*	*	*	*	*	*	*	*	*	*	*	*	*	*	*	*	*
23	Quintana Roo	3	Isla Mujeres	314	Santa Lucía (El Tigre)	865312	211421	10	2	*	*	*	*	*	*	*	*	*	*	*	*	*	*	*	*	*	*	*	*	*	*	*	*	*	*	*	*	*	*	*	*	*	*	*	*	*	*	*	*
23	Quintana Roo	3	Isla Mujeres	315	Santa Odila	865134	211449	5	10	*	*	*	*	*	*	*	*	*	*	*	*	*	*	*	*	*	*	*	*	*	*	*	*	*	*	*	*	*	*	*	*	*	*	*	*	*	*	*	*
23	Quintana Roo	3	Isla Mujeres	318	Refugio del Pirata Morgan	864842	211827	5	7	*	*	*	*	*	*	*	*	*	*	*	*	*	*	*	*	*	*	*	*	*	*	*	*	*	*	*	*	*	*	*	*	*	*	*	*	*	*	*	*
23	Quintana Roo	3	Isla Mujeres	320	Villas Mar	864809	211321	5	4	*	*	*	*	*	*	*	*	*	*	*	*	*	*	*	*	*	*	*	*	*	*	*	*	*	*	*	*	*	*	*	*	*	*	*	*	*	*	*	*
23	Quintana Roo	3	Isla Mujeres	322	Santa Marcela de los Cutis	865426	211509	10	5	*	*	*	*	*	*	*	*	*	*	*	*	*	*	*	*	*	*	*	*	*	*	*	*	*	*	*	*	*	*	*	*	*	*	*	*	*	*	*	*
23	Quintana Roo	3	Isla Mujeres	326	Arely	870517	211234	10	4	*	*	*	*	*	*	*	*	*	*	*	*	*	*	*	*	*	*	*	*	*	*	*	*	*	*	*	*	*	*	*	*	*	*	*	*	*	*	*	*
23	Quintana Roo	3	Isla Mujeres	327	Alberto Cauch	864751	211940	5	3	*	*	*	*	*	*	*	*	*	*	*	*	*	*	*	*	*	*	*	*	*	*	*	*	*	*	*	*	*	*	*	*	*	*	*	*	*	*	*	*
23	Quintana Roo	3	Isla Mujeres	328	El Azabache	870515	211431	10	5	*	*	*	*	*	*	*	*	*	*	*	*	*	*	*	*	*	*	*	*	*	*	*	*	*	*	*	*	*	*	*	*	*	*	*	*	*	*	*	*
23	Quintana Roo	3	Isla Mujeres	329	Berny y Caridad	870516	211339	10	4	*	*	*	*	*	*	*	*	*	*	*	*	*	*	*	*	*	*	*	*	*	*	*	*	*	*	*	*	*	*	*	*	*	*	*	*	*	*	*	*
23	Quintana Roo	3	Isla Mujeres	334	Casa Tangara	864807	211315	5	25	11	14	1	0	1	5	3	2	0	24	11	13	1	4	3	1	3	23	20	8	12	4	8	16	5	11	19	8	11	4	3	1	1	0	1	78.57	2.08	23	1	0
23	Quintana Roo	3	Isla Mujeres	335	Cinco Hermanos	870520	211543	10	4	*	*	*	*	*	*	*	*	*	*	*	*	*	*	*	*	*	*	*	*	*	*	*	*	*	*	*	*	*	*	*	*	*	*	*	*	*	*	*	*
23	Quintana Roo	3	Isla Mujeres	336	San Antonio	865046	211247	10	344	175	169	47	24	23	120	62	58	11	266	136	130	46	62	33	29	16	209	193	98	95	63	83	185	94	91	179	92	87	8	4	4	3	2	1	103.55	2.26	231	33	15
23	Quintana Roo	3	Isla Mujeres	337	Costa Mujeres	864809	211316	5	4	*	*	*	*	*	*	*	*	*	*	*	*	*	*	*	*	*	*	*	*	*	*	*	*	*	*	*	*	*	*	*	*	*	*	*	*	*	*	*	*
23	Quintana Roo	3	Isla Mujeres	339	Chalet Maya	864835	211843	5	4	*	*	*	*	*	*	*	*	*	*	*	*	*	*	*	*	*	*	*	*	*	*	*	*	*	*	*	*	*	*	*	*	*	*	*	*	*	*	*	*
23	Quintana Roo	3	Isla Mujeres	341	San Antonio	870516	211332	10	4	*	*	*	*	*	*	*	*	*	*	*	*	*	*	*	*	*	*	*	*	*	*	*	*	*	*	*	*	*	*	*	*	*	*	*	*	*	*	*	*
23	Quintana Roo	3	Isla Mujeres	344	La Esmeralda	870511	211520	10	3	*	*	*	*	*	*	*	*	*	*	*	*	*	*	*	*	*	*	*	*	*	*	*	*	*	*	*	*	*	*	*	*	*	*	*	*	*	*	*	*
23	Quintana Roo	3	Isla Mujeres	345	La Esperanza	870516	211314	10	4	*	*	*	*	*	*	*	*	*	*	*	*	*	*	*	*	*	*	*	*	*	*	*	*	*	*	*	*	*	*	*	*	*	*	*	*	*	*	*	*
23	Quintana Roo	3	Isla Mujeres	346	La Esperanza	870521	211431	10	4	*	*	*	*	*	*	*	*	*	*	*	*	*	*	*	*	*	*	*	*	*	*	*	*	*	*	*	*	*	*	*	*	*	*	*	*	*	*	*	*
23	Quintana Roo	3	Isla Mujeres	347	Fabio Mora	870516	211344	10	7	*	*	*	*	*	*	*	*	*	*	*	*	*	*	*	*	*	*	*	*	*	*	*	*	*	*	*	*	*	*	*	*	*	*	*	*	*	*	*	*
23	Quintana Roo	3	Isla Mujeres	350	Fernando Palma	865100	211307	5	197	100	97	21	10	11	58	27	31	6	133	68	65	21	31	14	17	10	106	96	51	45	30	40	90	47	43	90	47	43	6	4	2	2	2	0	103.09	2.75	118	14	6
23	Quintana Roo	3	Isla Mujeres	351	Las Flores	865457	211541	5	3	*	*	*	*	*	*	*	*	*	*	*	*	*	*	*	*	*	*	*	*	*	*	*	*	*	*	*	*	*	*	*	*	*	*	*	*	*	*	*	*
23	Quintana Roo	3	Isla Mujeres	352	Francisco May	870512	211635	10	235	125	110	26	15	11	79	42	37	4	162	87	75	28	49	26	23	21	130	109	60	49	33	37	98	52	46	99	53	46	11	8	3	5	4	1	113.64	3.02	161	1	0
23	Quintana Roo	3	Isla Mujeres	354	El Gran Chaparral	870522	211405	10	7	*	*	*	*	*	*	*	*	*	*	*	*	*	*	*	*	*	*	*	*	*	*	*	*	*	*	*	*	*	*	*	*	*	*	*	*	*	*	*	*
23	Quintana Roo	3	Isla Mujeres	355	La Guadalupana	870516	211348	10	4	*	*	*	*	*	*	*	*	*	*	*	*	*	*	*	*	*	*	*	*	*	*	*	*	*	*	*	*	*	*	*	*	*	*	*	*	*	*	*	*
23	Quintana Roo	3	Isla Mujeres	356	Héctor Da Silva	864754	211937	5	1	*	*	*	*	*	*	*	*	*	*	*	*	*	*	*	*	*	*	*	*	*	*	*	*	*	*	*	*	*	*	*	*	*	*	*	*	*	*	*	*
23	Quintana Roo	3	Isla Mujeres	367	El Buen Pastor	870518	211856	10	4	*	*	*	*	*	*	*	*	*	*	*	*	*	*	*	*	*	*	*	*	*	*	*	*	*	*	*	*	*	*	*	*	*	*	*	*	*	*	*	*
23	Quintana Roo	3	Isla Mujeres	368	Tunich	870521	211441	10	4	*	*	*	*	*	*	*	*	*	*	*	*	*	*	*	*	*	*	*	*	*	*	*	*	*	*	*	*	*	*	*	*	*	*	*	*	*	*	*	*
23	Quintana Roo	3	Isla Mujeres	372	Jesús Alberto López Camino	864812	211309	5	4	*	*	*	*	*	*	*	*	*	*	*	*	*	*	*	*	*	*	*	*	*	*	*	*	*	*	*	*	*	*	*	*	*	*	*	*	*	*	*	*
23	Quintana Roo	3	Isla Mujeres	376	José Canché	865045	211254	10	18	*	*	*	*	*	*	*	*	*	*	*	*	*	*	*	*	*	*	*	*	*	*	*	*	*	*	*	*	*	*	*	*	*	*	*	*	*	*	*	*
23	Quintana Roo	3	Isla Mujeres	377	José María	870300	211420	10	4	*	*	*	*	*	*	*	*	*	*	*	*	*	*	*	*	*	*	*	*	*	*	*	*	*	*	*	*	*	*	*	*	*	*	*	*	*	*	*	*
23	Quintana Roo	3	Isla Mujeres	378	Juan Carlos Rojas Chan	865126	211355	10	3	*	*	*	*	*	*	*	*	*	*	*	*	*	*	*	*	*	*	*	*	*	*	*	*	*	*	*	*	*	*	*	*	*	*	*	*	*	*	*	*
23	Quintana Roo	3	Isla Mujeres	379	Julio Cauich	870004	211336	10	4	*	*	*	*	*	*	*	*	*	*	*	*	*	*	*	*	*	*	*	*	*	*	*	*	*	*	*	*	*	*	*	*	*	*	*	*	*	*	*	*
23	Quintana Roo	3	Isla Mujeres	380	Angelito	870523	211415	10	3	*	*	*	*	*	*	*	*	*	*	*	*	*	*	*	*	*	*	*	*	*	*	*	*	*	*	*	*	*	*	*	*	*	*	*	*	*	*	*	*
23	Quintana Roo	3	Isla Mujeres	383	San José de la Loma	865132	211403	10	33	21	12	1	1	0	6	3	3	0	24	16	8	5	5	2	3	0	19	19	14	5	7	5	19	14	5	18	13	5	0	0	0	0	0	0	175	2.4	13	9	6
23	Quintana Roo	3	Isla Mujeres	384	San Juan de los Reyes	870516	212017	10	4	*	*	*	*	*	*	*	*	*	*	*	*	*	*	*	*	*	*	*	*	*	*	*	*	*	*	*	*	*	*	*	*	*	*	*	*	*	*	*	*
23	Quintana Roo	3	Isla Mujeres	386	El Palomo	870517	211244	10	7	*	*	*	*	*	*	*	*	*	*	*	*	*	*	*	*	*	*	*	*	*	*	*	*	*	*	*	*	*	*	*	*	*	*	*	*	*	*	*	*
23	Quintana Roo	3	Isla Mujeres	387	Paradise Beach Club	864809	211327	5	3	*	*	*	*	*	*	*	*	*	*	*	*	*	*	*	*	*	*	*	*	*	*	*	*	*	*	*	*	*	*	*	*	*	*	*	*	*	*	*	*
23	Quintana Roo	3	Isla Mujeres	388	Pedregal del Río Manatí	865039	211336	5	1	*	*	*	*	*	*	*	*	*	*	*	*	*	*	*	*	*	*	*	*	*	*	*	*	*	*	*	*	*	*	*	*	*	*	*	*	*	*	*	*
23	Quintana Roo	3	Isla Mujeres	391	Punta Cocos	864916	211842	5	4	*	*	*	*	*	*	*	*	*	*	*	*	*	*	*	*	*	*	*	*	*	*	*	*	*	*	*	*	*	*	*	*	*	*	*	*	*	*	*	*
23	Quintana Roo	3	Isla Mujeres	392	El Sauce y la Palma	865554	211704	10	1	*	*	*	*	*	*	*	*	*	*	*	*	*	*	*	*	*	*	*	*	*	*	*	*	*	*	*	*	*	*	*	*	*	*	*	*	*	*	*	*
23	Quintana Roo	3	Isla Mujeres	395	Residencial Arrecifes	864813	211318	5	30	15	15	1	0	1	5	3	2	0	10	5	5	3	4	3	1	1	7	6	2	4	1	4	6	2	4	5	2	3	0	0	0	0	0	0	100	1.4	6	4	3
23	Quintana Roo	3	Isla Mujeres	398	El Sacrificio	870516	211335	10	1	*	*	*	*	*	*	*	*	*	*	*	*	*	*	*	*	*	*	*	*	*	*	*	*	*	*	*	*	*	*	*	*	*	*	*	*	*	*	*	*
23	Quintana Roo	3	Isla Mujeres	399	El Oriental	870517	211250	10	3	*	*	*	*	*	*	*	*	*	*	*	*	*	*	*	*	*	*	*	*	*	*	*	*	*	*	*	*	*	*	*	*	*	*	*	*	*	*	*	*
23	Quintana Roo	3	Isla Mujeres	402	Los Tres Magos del Oriente	865049	211259	10	10	5	5	1	1	0	2	1	1	0	9	4	5	1	1	0	1	0	8	8	4	4	2	2	6	3	3	8	4	4	2	1	1	1	1	0	100	3	8	1	0
23	Quintana Roo	3	Isla Mujeres	403	San Manuel	865059	211354	5	23	13	10	1	0	1	5	2	3	1	18	11	7	2	3	2	1	1	15	14	9	5	1	4	11	7	4	14	9	5	3	2	1	3	2	1	130	4.6	16	2	1
23	Quintana Roo	3	Isla Mujeres	405	Santa Lucía	870516	211415	10	4	*	*	*	*	*	*	*	*	*	*	*	*	*	*	*	*	*	*	*	*	*	*	*	*	*	*	*	*	*	*	*	*	*	*	*	*	*	*	*	*
23	Quintana Roo	3	Isla Mujeres	406	Santa Rosario	870522	211343	10	4	*	*	*	*	*	*	*	*	*	*	*	*	*	*	*	*	*	*	*	*	*	*	*	*	*	*	*	*	*	*	*	*	*	*	*	*	*	*	*	*
23	Quintana Roo	3	Isla Mujeres	407	Santa Teresa	870523	211300	10	2	*	*	*	*	*	*	*	*	*	*	*	*	*	*	*	*	*	*	*	*	*	*	*	*	*	*	*	*	*	*	*	*	*	*	*	*	*	*	*	*
23	Quintana Roo	3	Isla Mujeres	408	San José Nayarit	865543	211716	5	2	*	*	*	*	*	*	*	*	*	*	*	*	*	*	*	*	*	*	*	*	*	*	*	*	*	*	*	*	*	*	*	*	*	*	*	*	*	*	*	*
23	Quintana Roo	3	Isla Mujeres	409	El Silbido	870042	211342	10	4	*	*	*	*	*	*	*	*	*	*	*	*	*	*	*	*	*	*	*	*	*	*	*	*	*	*	*	*	*	*	*	*	*	*	*	*	*	*	*	*
23	Quintana Roo	3	Isla Mujeres	410	Tecatejete	870516	211302	10	1	*	*	*	*	*	*	*	*	*	*	*	*	*	*	*	*	*	*	*	*	*	*	*	*	*	*	*	*	*	*	*	*	*	*	*	*	*	*	*	*
23	Quintana Roo	3	Isla Mujeres	412	Uch Ben Cah	870522	211402	10	4	*	*	*	*	*	*	*	*	*	*	*	*	*	*	*	*	*	*	*	*	*	*	*	*	*	*	*	*	*	*	*	*	*	*	*	*	*	*	*	*
23	Quintana Roo	3	Isla Mujeres	413	Localidad sin Nombre	870516	211337	10	3	*	*	*	*	*	*	*	*	*	*	*	*	*	*	*	*	*	*	*	*	*	*	*	*	*	*	*	*	*	*	*	*	*	*	*	*	*	*	*	*
23	Quintana Roo	3	Isla Mujeres	414	Villa Erfica	864809	211329	5	3	*	*	*	*	*	*	*	*	*	*	*	*	*	*	*	*	*	*	*	*	*	*	*	*	*	*	*	*	*	*	*	*	*	*	*	*	*	*	*	*
23	Quintana Roo	3	Isla Mujeres	415	Villa Fragata	864756	211930	5	11	7	4	0	0	0	0	0	0	0	3	3	0	0	0	0	0	0	3	3	3	0	2	0	3	3	0	3	3	0	0	0	0	0	0	0	175	*	3	0	0
23	Quintana Roo	3	Isla Mujeres	416	Villa Nifers	864808	211919	5	1	*	*	*	*	*	*	*	*	*	*	*	*	*	*	*	*	*	*	*	*	*	*	*	*	*	*	*	*	*	*	*	*	*	*	*	*	*	*	*	*
23	Quintana Roo	3	Isla Mujeres	418	Banco de León	865140	211512	5	1	*	*	*	*	*	*	*	*	*	*	*	*	*	*	*	*	*	*	*	*	*	*	*	*	*	*	*	*	*	*	*	*	*	*	*	*	*	*	*	*
23	Quintana Roo	3	Isla Mujeres	419	La Casa de los Sueños b y b	864321	211237	5	3	*	*	*	*	*	*	*	*	*	*	*	*	*	*	*	*	*	*	*	*	*	*	*	*	*	*	*	*	*	*	*	*	*	*	*	*	*	*	*	*
23	Quintana Roo	3	Isla Mujeres	421	Escénica	864809	211334	5	26	13	13	0	0	0	0	0	0	0	2	1	1	0	0	0	0	0	2	2	1	1	0	0	1	0	1	2	1	1	1	1	0	1	1	0	100	2	0	2	1
23	Quintana Roo	3	Isla Mujeres	423	Mar y Sol	864331	211251	5	1	*	*	*	*	*	*	*	*	*	*	*	*	*	*	*	*	*	*	*	*	*	*	*	*	*	*	*	*	*	*	*	*	*	*	*	*	*	*	*	*
23	Quintana Roo	3	Isla Mujeres	425	El Búnker	864333	211253	5	4	*	*	*	*	*	*	*	*	*	*	*	*	*	*	*	*	*	*	*	*	*	*	*	*	*	*	*	*	*	*	*	*	*	*	*	*	*	*	*	*
23	Quintana Roo	3	Isla Mujeres	428	Tomás Rosales	865559	211728	5	1	*	*	*	*	*	*	*	*	*	*	*	*	*	*	*	*	*	*	*	*	*	*	*	*	*	*	*	*	*	*	*	*	*	*	*	*	*	*	*	*
23	Quintana Roo	3	Isla Mujeres	430	Martha Elena	870516	211421	10	4	*	*	*	*	*	*	*	*	*	*	*	*	*	*	*	*	*	*	*	*	*	*	*	*	*	*	*	*	*	*	*	*	*	*	*	*	*	*	*	*
23	Quintana Roo	3	Isla Mujeres	432	Chechén Chairs	864814	211334	5	2	*	*	*	*	*	*	*	*	*	*	*	*	*	*	*	*	*	*	*	*	*	*	*	*	*	*	*	*	*	*	*	*	*	*	*	*	*	*	*	*
23	Quintana Roo	3	Isla Mujeres	433	Chico Cenote	864954	211320	5	1	*	*	*	*	*	*	*	*	*	*	*	*	*	*	*	*	*	*	*	*	*	*	*	*	*	*	*	*	*	*	*	*	*	*	*	*	*	*	*	*
23	Quintana Roo	3	Isla Mujeres	434	Desarrollo Playa Mujeres	864819	211437	5	4	*	*	*	*	*	*	*	*	*	*	*	*	*	*	*	*	*	*	*	*	*	*	*	*	*	*	*	*	*	*	*	*	*	*	*	*	*	*	*	*
23	Quintana Roo	3	Isla Mujeres	435	El Dorado	864740	212005	5	3	*	*	*	*	*	*	*	*	*	*	*	*	*	*	*	*	*	*	*	*	*	*	*	*	*	*	*	*	*	*	*	*	*	*	*	*	*	*	*	*
23	Quintana Roo	3	Isla Mujeres	436	Los Laureles	865548	211651	5	1	*	*	*	*	*	*	*	*	*	*	*	*	*	*	*	*	*	*	*	*	*	*	*	*	*	*	*	*	*	*	*	*	*	*	*	*	*	*	*	*
23	Quintana Roo	3	Isla Mujeres	438	Dos Arbolitos	865408	211501	5	2	*	*	*	*	*	*	*	*	*	*	*	*	*	*	*	*	*	*	*	*	*	*	*	*	*	*	*	*	*	*	*	*	*	*	*	*	*	*	*	*
23	Quintana Roo	3	Isla Mujeres	441	Mira Playa	864818	211330	5	14	4	10	0	0	0	1	1	0	0	14	4	10	0	1	1	0	1	14	13	3	10	3	6	9	1	8	12	3	9	4	2	2	4	2	2	40	1.7	9	2	1
23	Quintana Roo	3	Isla Mujeres	443	José Canché	865338	211450	10	2	*	*	*	*	*	*	*	*	*	*	*	*	*	*	*	*	*	*	*	*	*	*	*	*	*	*	*	*	*	*	*	*	*	*	*	*	*	*	*	*
23	Quintana Roo	3	Isla Mujeres	444	Los Mariachis 2	870521	211410	10	12	*	*	*	*	*	*	*	*	*	*	*	*	*	*	*	*	*	*	*	*	*	*	*	*	*	*	*	*	*	*	*	*	*	*	*	*	*	*	*	*
23	Quintana Roo	3	Isla Mujeres	445	Los Mariachis	870521	211412	10	4	*	*	*	*	*	*	*	*	*	*	*	*	*	*	*	*	*	*	*	*	*	*	*	*	*	*	*	*	*	*	*	*	*	*	*	*	*	*	*	*
23	Quintana Roo	3	Isla Mujeres	446	Los Potrillos	870516	211407	10	4	*	*	*	*	*	*	*	*	*	*	*	*	*	*	*	*	*	*	*	*	*	*	*	*	*	*	*	*	*	*	*	*	*	*	*	*	*	*	*	*
23	Quintana Roo	3	Isla Mujeres	447	Tres Marías	870523	211237	10	4	*	*	*	*	*	*	*	*	*	*	*	*	*	*	*	*	*	*	*	*	*	*	*	*	*	*	*	*	*	*	*	*	*	*	*	*	*	*	*	*
23	Quintana Roo	3	Isla Mujeres	9998	Localidades de una vivienda				318	182	136	21	11	10	48	24	24	1	170	108	62	15	26	13	13	11	154	143	95	48	44	38	126	82	44	130	90	40	17	13	4	13	10	3	133.82	2.94	140	30	17
23	Quintana Roo	3	Isla Mujeres	9999	Localidades de dos viviendas				111	62	49	12	6	6	33	16	17	2	88	51	37	14	19	10	9	5	72	67	41	26	28	21	60	35	25	58	36	22	7	6	1	3	2	1	126.53	2.89	77	11	7
23	Quintana Roo	4	Othón P. Blanco	0	Total del Municipio				219763	109059	110704	20471	10433	10038	67552	34444	33108	4592	192576	95256	97320	27533	42489	21696	20793	14956	160451	145495	71245	74250	43064	60290	131524	63821	67703	131058	63992	67066	13971	7424	6547	8998	4829	4169	98.51	2.42	183260	7759	4015
23	Quintana Roo	4	Othón P. Blanco	1	Chetumal	881819	183013	10	136825	67039	69786	11846	6136	5710	37630	19264	18366	2521	119025	57924	61101	15107	23263	11864	11399	8156	101397	93241	44796	48445	26796	39537	85385	40987	44398	84869	40618	44251	7856	3809	4047	4985	2397	2588	96.06	2.09	112791	5398	2783
23	Quintana Roo	4	Othón P. Blanco	7	Álvaro Obregón Viejo	883635	181816	40	164	78	86	17	9	8	63	28	35	5	147	69	78	35	41	17	24	6	107	101	50	51	29	40	91	46	45	93	44	49	10	4	6	10	4	6	90.7	2.94	144	0	0
23	Quintana Roo	4	Othón P. Blanco	8	Allende	883321	182301	30	823	432	391	78	33	45	269	139	130	20	743	397	346	113	171	95	76	58	610	552	291	261	150	208	487	251	236	512	271	241	65	40	25	43	27	16	110.49	2.98	678	15	11
23	Quintana Roo	4	Othón P. Blanco	11	Bacalar	882343	184037	10	9833	4783	5050	974	474	500	3317	1624	1693	230	8703	4232	4471	1350	2113	1038	1075	763	7123	6360	3082	3278	2010	2632	5689	2731	2958	5611	2705	2906	671	351	320	443	229	214	94.71	2.59	8405	243	110
23	Quintana Roo	4	Othón P. Blanco	12	Buenavista	881413	185251	10	618	312	306	47	21	26	208	104	104	14	570	291	279	88	147	73	74	59	468	409	208	201	116	147	342	169	173	367	187	180	67	39	28	43	27	16	101.96	3.42	566	2	2
23	Quintana Roo	4	Othón P. Blanco	14	Cacao	884142	181134	50	1915	984	931	228	114	114	717	357	360	39	1672	862	810	295	450	225	225	155	1338	1183	619	564	405	468	1068	540	528	1045	553	492	115	79	36	74	53	21	105.69	2.87	1626	21	8
23	Quintana Roo	4	Othón P. Blanco	15	El Cafetal	880648	185841	10	2	*	*	*	*	*	*	*	*	*	*	*	*	*	*	*	*	*	*	*	*	*	*	*	*	*	*	*	*	*	*	*	*	*	*	*	*	*	*	*	*
23	Quintana Roo	4	Othón P. Blanco	16	Calderitas	881530	183316	15	4446	2191	2255	398	176	222	1383	696	687	107	3990	1986	2004	578	878	474	404	300	3305	3005	1466	1539	974	1244	2697	1295	1402	2665	1291	1374	308	171	137	199	116	83	97.16	2.57	3846	123	68
23	Quintana Roo	4	Othón P. Blanco	17	Esteban Baca Calderón	884921	180035	100	209	95	114	16	4	12	84	32	52	6	193	91	102	40	62	25	37	22	147	125	63	62	34	44	101	50	51	113	56	57	24	13	11	15	9	6	83.33	3.72	192	1	0
23	Quintana Roo	4	Othón P. Blanco	18	Caobas	890615	182639	150	1322	665	657	119	56	63	475	229	246	37	1199	606	593	212	319	150	169	107	950	843	433	410	286	323	731	370	361	724	374	350	112	63	49	74	45	29	101.22	3	1122	44	20
23	Quintana Roo	4	Othón P. Blanco	20	Cocoyol	884122	180959	90	990	499	491	120	65	55	385	199	186	24	861	429	432	151	241	121	120	90	686	596	295	301	176	233	504	251	253	539	270	269	92	44	48	57	28	29	101.63	3.46	830	26	12
23	Quintana Roo	4	Othón P. Blanco	21	Limones	880630	190127	25	1961	998	963	219	120	99	774	390	384	49	1716	865	851	331	506	246	260	175	1336	1161	595	566	380	453	1023	511	512	1020	523	497	138	84	54	91	54	37	103.63	3.52	1631	80	39
23	Quintana Roo	4	Othón P. Blanco	24	Chacchoben	881025	190212	25	568	283	285	45	22	23	202	94	108	16	523	261	262	91	141	65	76	50	416	366	189	177	97	132	299	148	151	321	168	153	67	41	26	51	34	17	99.3	3.78	509	3	2
23	Quintana Roo	4	Othón P. Blanco	27	Los Divorciados	882723	190435	40	1108	538	570	104	53	51	381	182	199	28	860	413	447	155	249	117	132	94	677	583	284	299	195	238	511	240	271	518	262	256	72	44	28	41	25	16	94.39	4.48	848	6	3
23	Quintana Roo	4	Othón P. Blanco	31	Estero Franco	885239	175625	70	6	*	*	*	*	*	*	*	*	*	*	*	*	*	*	*	*	*	*	*	*	*	*	*	*	*	*	*	*	*	*	*	*	*	*	*	*	*	*	*	*
23	Quintana Roo	4	Othón P. Blanco	32	San Francisco Botes	884326	180645	80	505	259	246	49	23	26	184	99	85	16	452	234	218	69	119	69	50	50	367	317	158	159	93	119	273	133	140	280	139	141	44	25	19	27	16	11	105.28	3.56	448	0	0
23	Quintana Roo	4	Othón P. Blanco	33	Francisco Villa	885045	182839	100	820	405	415	98	52	46	343	173	170	25	721	352	369	135	220	108	112	85	561	476	231	245	159	201	427	202	225	413	202	211	49	29	20	35	21	14	97.59	3.21	713	0	0
23	Quintana Roo	4	Othón P. Blanco	37	Huay-Pix	882534	183104	10	1526	763	763	166	82	84	553	262	291	38	1345	674	671	224	349	163	186	125	1083	958	494	464	340	394	876	443	433	836	425	411	82	51	31	51	33	18	100	2.63	1248	84	46
23	Quintana Roo	4	Othón P. Blanco	38	Jesús González Ortega	884013	182917	50	592	315	277	60	32	28	229	125	104	13	531	283	248	99	156	87	69	57	419	362	190	172	96	138	313	156	157	323	169	154	49	34	15	34	24	10	113.72	3.25	506	19	8
23	Quintana Roo	4	Othón P. Blanco	39	Juan Sarabia	882853	183011	15	847	437	410	89	45	44	276	149	127	18	755	391	364	115	169	91	78	54	622	568	287	281	176	227	490	241	249	515	258	257	78	46	32	46	28	18	106.59	3.27	738	17	6
23	Quintana Roo	4	Othón P. Blanco	50	Laguna Guerrero	881555	184120	10	568	299	269	54	30	24	185	104	81	18	510	267	243	68	113	63	50	45	424	379	193	186	130	141	317	154	163	334	176	158	62	39	23	40	26	14	111.15	3.04	480	28	13
23	Quintana Roo	4	Othón P. Blanco	53	Mahahual	874234	184250	5	282	156	126	24	12	12	72	37	35	3	258	144	114	31	45	23	22	14	224	210	119	91	51	79	199	111	88	192	110	82	11	8	3	6	4	2	123.81	2.23	228	20	13
23	Quintana Roo	4	Othón P. Blanco	60	Nachi Cocom	884504	182859	50	761	392	369	76	36	40	314	160	154	24	684	355	329	143	214	111	103	71	517	446	231	215	148	170	381	194	187	393	204	189	65	37	28	44	27	17	106.23	3.4	654	23	10
23	Quintana Roo	4	Othón P. Blanco	64	Nicolás Bravo	885540	182728	100	3653	1758	1895	408	180	228	1411	692	719	91	3239	1574	1665	590	912	460	452	322	2558	2236	1062	1174	656	920	1927	892	1035	1985	944	1041	309	170	139	197	109	88	92.77	3.14	3065	140	60
23	Quintana Roo	4	Othón P. Blanco	67	Palmar	883150	182648	50	955	499	456	71	46	25	303	163	140	21	880	451	429	136	211	110	101	75	723	648	334	314	189	258	568	287	281	584	300	284	80	47	33	54	36	18	109.43	2.85	841	36	22
23	Quintana Roo	4	Othón P. Blanco	68	Pedro Antonio Santos	880948	185718	20	485	250	235	66	35	31	189	98	91	12	419	215	204	67	111	54	57	44	340	296	152	144	93	118	267	134	133	264	138	126	29	18	11	18	12	6	106.38	2.77	405	3	2
23	Quintana Roo	4	Othón P. Blanco	70	Revolución	884915	175827	80	100	43	57	12	4	8	47	19	28	3	88	39	49	17	32	15	17	15	68	53	24	29	20	24	50	21	29	43	20	23	3	3	0	2	2	0	75.44	2.74	79	9	4
23	Quintana Roo	4	Othón P. Blanco	73	Ramonal	883154	182509	30	862	461	401	96	47	49	293	156	137	18	766	414	352	126	179	97	82	53	622	569	305	264	176	214	511	269	242	520	282	238	58	36	22	31	19	12	114.96	2.94	735	22	14
23	Quintana Roo	4	Othón P. Blanco	74	Reforma	883419	184848	30	806	411	395	86	50	36	306	168	138	19	716	359	357	127	201	107	94	74	570	496	241	255	146	206	428	195	233	439	213	226	68	46	22	42	27	15	104.05	3.59	701	11	6
23	Quintana Roo	4	Othón P. Blanco	75	Rio Indio	874003	184828	5	20	10	10	0	0	0	0	0	0	0	20	10	10	0	0	0	0	0	20	20	10	10	5	9	17	8	9	17	10	7	3	2	1	1	1	0	100	2.9	16	4	2
23	Quintana Roo	4	Othón P. Blanco	77	Sabidos	883522	182121	50	1265	680	585	129	60	69	390	206	184	22	1136	620	516	155	239	136	103	84	959	875	474	401	281	338	780	411	369	795	435	360	95	63	32	56	36	20	116.24	2.79	1101	13	9
23	Quintana Roo	4	Othón P. Blanco	85	San Manuel	881335	183610	10	1	*	*	*	*	*	*	*	*	*	*	*	*	*	*	*	*	*	*	*	*	*	*	*	*	*	*	*	*	*	*	*	*	*	*	*	*	*	*	*	*
23	Quintana Roo	4	Othón P. Blanco	98	Subteniente López	882335	182937	10	1890	952	938	204	108	96	615	321	294	44	1674	838	836	242	367	195	172	125	1388	1263	625	638	389	497	1124	555	569	1137	558	579	139	70	69	101	55	46	101.49	2.74	1546	109	54
23	Quintana Roo	4	Othón P. Blanco	99	El Suspiro	883146	184528	30	10	7	3	0	0	0	2	2	0	0	10	7	3	2	2	2	0	0	8	8	5	3	4	3	8	5	3	5	3	2	0	0	0	0	0	0	233.33	3	10	0	0
23	Quintana Roo	4	Othón P. Blanco	102	Los Siete Hermanos	880846	190822	30	10	*	*	*	*	*	*	*	*	*	*	*	*	*	*	*	*	*	*	*	*	*	*	*	*	*	*	*	*	*	*	*	*	*	*	*	*	*	*	*	*
23	Quintana Roo	4	Othón P. Blanco	104	Ucum	883106	183011	40	1345	668	677	155	79	76	480	244	236	31	1187	587	600	195	294	153	141	99	961	862	422	440	279	364	773	368	405	757	367	390	89	54	35	55	35	20	98.67	2.89	1141	43	15
23	Quintana Roo	4	Othón P. Blanco	106	La Unión	885250	175350	70	1083	570	513	104	60	44	417	229	188	29	977	509	468	190	284	155	129	94	758	664	340	324	204	253	576	285	291	566	283	283	88	55	33	62	37	25	111.11	3.6	971	0	0
23	Quintana Roo	4	Othón P. Blanco	107	Vallejo	882218	183051	10	31	17	14	5	4	1	8	5	3	1	26	13	13	1	2	1	1	1	24	23	12	11	6	10	21	11	10	21	11	10	2	1	1	1	1	0	121.43	1.67	26	0	0
23	Quintana Roo	4	Othón P. Blanco	108	Vallehermoso	883128	191108	50	453	211	242	37	15	22	157	65	92	11	416	196	220	61	109	43	66	48	344	296	146	150	74	101	239	110	129	264	128	136	57	36	21	35	22	13	87.19	3.2	405	11	7
23	Quintana Roo	4	Othón P. Blanco	110	Sacxan	883111	182757	20	756	375	381	96	51	45	290	141	149	22	657	322	335	105	172	78	94	67	530	463	232	231	146	193	415	205	210	415	210	205	48	27	21	30	17	13	98.43	2.75	613	43	21
23	Quintana Roo	4	Othón P. Blanco	111	Xcalak	875009	181617	10	252	141	111	30	13	17	84	48	36	6	210	122	88	38	48	31	17	10	166	156	87	69	40	54	136	74	62	150	85	65	20	13	7	10	7	3	127.03	2.86	205	4	2
23	Quintana Roo	4	Othón P. Blanco	114	Xul-Ha	882750	183306	25	1838	936	902	173	100	73	551	297	254	45	1628	818	810	214	333	174	159	119	1369	1250	621	629	382	501	1087	529	558	1134	559	575	163	92	71	114	67	47	103.77	2.73	1548	63	33
23	Quintana Roo	4	Othón P. Blanco	115	Altos de Sevilla	884038	185106	60	541	284	257	52	29	23	219	121	98	16	489	255	234	111	151	84	67	40	362	322	163	159	107	131	288	144	144	277	146	131	34	19	15	28	15	13	110.51	3.03	450	25	14
23	Quintana Roo	4	Othón P. Blanco	116	Lázaro Cárdenas	881238	185844	20	483	258	225	34	18	16	167	87	80	14	444	238	206	78	119	61	58	41	352	311	169	142	84	104	269	147	122	274	142	132	42	22	20	31	17	14	114.67	4.14	444	0	0
23	Quintana Roo	4	Othón P. Blanco	117	Tomás Garrido Canabal	890405	180215	50	320	168	152	25	14	11	115	60	55	3	295	154	141	52	87	44	43	35	240	205	108	97	55	78	181	92	89	187	100	87	24	16	8	16	11	5	110.53	3.13	286	6	3
23	Quintana Roo	4	Othón P. Blanco	119	San Pedro Peralta	885124	184201	150	658	308	350	60	23	37	253	122	131	19	596	285	311	106	174	88	86	68	471	403	186	217	124	180	357	157	200	347	166	181	46	29	17	35	22	13	88	3.13	570	15	7
23	Quintana Roo	4	Othón P. Blanco	123	Javier Rojo Gómez	884052	181626	50	2873	1472	1401	287	166	121	868	470	398	84	2563	1293	1270	320	497	257	240	177	2159	1982	989	993	553	820	1807	887	920	1802	897	905	175	102	73	117	73	44	105.07	2.42	2443	114	59
23	Quintana Roo	4	Othón P. Blanco	124	Álvaro Obregón	883921	181739	50	2825	1444	1381	282	136	146	935	454	481	52	2541	1306	1235	390	601	301	300	211	2099	1888	988	900	554	715	1652	845	807	1692	890	802	236	143	93	164	101	63	104.56	2.94	2453	67	41
23	Quintana Roo	4	Othón P. Blanco	125	Andrés Quintana Roo	883240	185020	20	108	55	53	14	5	9	40	21	19	2	94	50	44	15	24	14	10	9	77	68	34	34	16	25	56	25	31	59	31	28	12	9	3	10	8	2	103.77	3.31	85	8	4
23	Quintana Roo	4	Othón P. Blanco	126	El Bajío	883333	185658	30	2	*	*	*	*	*	*	*	*	*	*	*	*	*	*	*	*	*	*	*	*	*	*	*	*	*	*	*	*	*	*	*	*	*	*	*	*	*	*	*	*
23	Quintana Roo	4	Othón P. Blanco	128	Blanca Flor	882957	185520	30	635	323	312	53	27	26	237	119	118	13	582	296	286	101	171	84	87	70	468	398	204	194	151	159	355	177	178	333	171	162	43	27	16	29	18	11	103.53	3.16	567	15	9
23	Quintana Roo	4	Othón P. Blanco	129	Buena Esperanza	883828	185625	40	380	201	179	35	21	14	133	71	62	8	345	180	165	54	90	46	44	36	283	247	130	117	82	94	220	115	105	219	115	104	27	15	12	19	10	9	112.29	2.99	342	0	0
23	Quintana Roo	4	Othón P. Blanco	130	La Buena Fe	883025	185855	20	232	127	105	33	21	12	103	57	46	10	199	106	93	37	60	31	29	23	152	129	70	59	47	51	118	62	56	108	59	49	11	8	3	10	7	3	120.95	3.87	198	0	0
23	Quintana Roo	4	Othón P. Blanco	134	Caan Lumil	882258	185414	40	230	125	105	24	13	11	100	55	45	9	205	111	94	50	67	38	29	17	146	129	69	60	39	45	112	59	53	112	59	53	17	10	7	14	8	6	119.05	4.23	182	7	4
23	Quintana Roo	4	Othón P. Blanco	136	Carlos A. Madrazo	883121	183008	40	1769	894	875	208	108	100	582	294	288	43	1558	785	773	223	331	163	168	108	1292	1184	599	585	335	473	1071	535	536	1078	545	533	113	64	49	71	44	27	102.17	2.68	1445	105	53
23	Quintana Roo	4	Othón P. Blanco	143	David Gustavo Gutiérrez Ruiz	884218	185348	50	345	176	169	34	22	12	136	74	62	7	311	154	157	54	95	50	45	41	250	209	102	107	80	90	192	92	100	168	80	88	17	10	7	9	6	3	104.14	3.41	308	0	0
23	Quintana Roo	4	Othón P. Blanco	144	Zamora	884733	190450	30	400	199	201	37	19	18	149	78	71	8	360	179	181	69	104	55	49	35	283	248	120	128	85	102	213	96	117	211	97	114	35	24	11	17	12	5	99	4.35	344	11	7
23	Quintana Roo	4	Othón P. Blanco	148	Francisco Villa	885324	190638	40	109	47	62	17	6	11	48	17	31	7	92	41	51	14	24	10	14	10	71	61	30	31	23	24	54	25	29	49	24	25	7	5	2	5	3	2	75.81	3.4	87	3	2
23	Quintana Roo	4	Othón P. Blanco	149	Gabino Vázquez	884505	190235	50	20	13	7	2	1	1	7	5	2	0	18	12	6	2	5	4	1	3	16	13	8	5	5	4	12	7	5	12	7	5	1	1	0	0	0	0	185.71	4	18	0	0
23	Quintana Roo	4	Othón P. Blanco	150	La Pantera	882933	190826	40	677	342	335	88	44	44	248	120	128	13	584	295	289	102	147	70	77	45	469	424	219	205	148	166	378	194	184	366	187	179	46	25	21	28	16	12	102.09	4.13	553	16	8
23	Quintana Roo	4	Othón P. Blanco	152	Guadalupe Victoria	883554	190747	10	402	206	196	66	27	39	197	87	110	9	334	178	156	84	122	55	67	38	241	203	118	85	70	70	180	103	77	180	105	75	23	15	8	14	9	5	105.1	5.22	333	0	0
23	Quintana Roo	4	Othón P. Blanco	159	Kohunlich	884724	182509	20	2	*	*	*	*	*	*	*	*	*	*	*	*	*	*	*	*	*	*	*	*	*	*	*	*	*	*	*	*	*	*	*	*	*	*	*	*	*	*	*	*
23	Quintana Roo	4	Othón P. Blanco	162	La Ceiba	883005	184732	20	106	59	47	12	9	3	38	23	15	5	94	50	44	16	21	12	9	5	73	68	36	32	16	19	56	31	25	63	34	29	12	5	7	6	3	3	125.53	3.47	94	0	0
23	Quintana Roo	4	Othón P. Blanco	163	Lázaro Cárdenas Segundo	885129	184205	50	595	277	318	55	24	31	218	98	120	19	540	253	287	96	144	63	81	48	425	377	179	198	125	155	332	153	179	330	153	177	45	26	19	32	18	14	87.11	3.37	519	9	4
23	Quintana Roo	4	Othón P. Blanco	164	San José los Lirios	884016	190035	40	14	*	*	*	*	*	*	*	*	*	*	*	*	*	*	*	*	*	*	*	*	*	*	*	*	*	*	*	*	*	*	*	*	*	*	*	*	*	*	*	*
23	Quintana Roo	4	Othón P. Blanco	165	Manuel Ávila Camacho	882507	190227	30	668	331	337	65	36	29	266	140	126	20	594	291	303	119	181	94	87	62	455	393	187	206	104	157	340	161	179	344	162	182	53	26	27	37	18	19	98.22	3.79	561	20	11
23	Quintana Roo	4	Othón P. Blanco	166	Margarita Maza de Juárez	883536	190510	40	221	116	105	26	12	14	83	38	45	6	194	103	91	36	51	25	26	15	152	137	77	60	35	40	112	63	49	126	71	55	25	14	11	14	10	4	110.48	4.81	188	6	4
23	Quintana Roo	4	Othón P. Blanco	168	Miguel Hidalgo y Costilla	882039	185000	20	415	206	209	47	19	28	174	83	91	12	366	186	180	70	115	59	56	45	284	239	122	117	77	95	210	106	104	211	109	102	29	16	13	15	9	6	98.56	3.66	354	10	5
23	Quintana Roo	4	Othón P. Blanco	176	Nuevo Jerusalén	883411	185945	40	375	199	176	45	18	27	144	77	67	11	329	181	148	50	88	53	35	38	268	230	122	108	76	87	196	102	94	196	104	92	34	20	14	22	16	6	113.07	4.2	326	2	1
23	Quintana Roo	4	Othón P. Blanco	179	El Paraíso	884040	185327	60	133	67	66	18	8	10	48	25	23	3	115	59	56	17	27	16	11	10	95	85	42	43	32	40	79	38	41	76	38	38	6	4	2	3	3	0	101.52	2.88	104	8	5
23	Quintana Roo	4	Othón P. Blanco	184	Pucté	883941	181400	50	1757	917	840	191	98	93	600	323	277	46	1564	817	747	232	363	199	164	131	1286	1155	592	563	327	455	1022	510	512	1039	529	510	133	82	51	86	55	31	109.17	2.92	1463	79	41
23	Quintana Roo	4	Othón P. Blanco	189	San Fernando	883645	185923	40	204	100	104	23	9	14	85	36	49	9	181	91	90	31	53	22	31	22	141	119	64	55	52	46	105	57	48	103	54	49	14	7	7	11	6	5	96.15	3.82	178	0	0
23	Quintana Roo	4	Othón P. Blanco	190	San Fernando	881533	183509	10	9	*	*	*	*	*	*	*	*	*	*	*	*	*	*	*	*	*	*	*	*	*	*	*	*	*	*	*	*	*	*	*	*	*	*	*	*	*	*	*	*
23	Quintana Roo	4	Othón P. Blanco	191	San Isidro	882720	183427	25	4	*	*	*	*	*	*	*	*	*	*	*	*	*	*	*	*	*	*	*	*	*	*	*	*	*	*	*	*	*	*	*	*	*	*	*	*	*	*	*	*
23	Quintana Roo	4	Othón P. Blanco	200	San Román	884338	184744	100	490	244	246	50	21	29	201	94	107	13	440	223	217	91	138	67	71	47	336	289	150	139	107	117	260	129	131	247	131	116	29	21	8	20	16	4	99.19	3.21	438	0	0
23	Quintana Roo	4	Othón P. Blanco	201	Sergio Butrón Casas	883409	183056	40	2099	1100	999	186	98	88	626	339	287	43	1907	999	908	248	397	220	177	149	1616	1467	758	709	392	541	1240	627	613	1321	680	641	227	131	96	159	95	64	110.11	3.21	1854	34	20
23	Quintana Roo	4	Othón P. Blanco	203	Tierra Negra	884254	185615	100	169	88	81	20	13	7	53	30	23	1	149	75	74	22	32	16	16	10	126	116	58	58	39	47	104	50	54	105	54	51	12	8	4	7	5	2	108.64	3.26	149	0	0
23	Quintana Roo	4	Othón P. Blanco	205	Tres Garantías	885858	181133	150	738	370	368	69	38	31	301	158	143	23	668	331	337	122	209	111	98	87	523	436	211	225	118	166	355	167	188	384	181	203	81	44	37	58	34	24	100.54	3.33	649	18	9
23	Quintana Roo	4	Othón P. Blanco	212	Huatusco	885040	185218	100	432	207	225	40	19	21	180	80	100	18	387	185	202	67	122	53	69	55	302	247	124	123	83	113	228	110	118	208	107	101	19	14	5	8	7	1	92	2.59	371	16	9
23	Quintana Roo	4	Othón P. Blanco	214	La Adelita	882621	183618	15	3	*	*	*	*	*	*	*	*	*	*	*	*	*	*	*	*	*	*	*	*	*	*	*	*	*	*	*	*	*	*	*	*	*	*	*	*	*	*	*	*
23	Quintana Roo	4	Othón P. Blanco	216	Arco Iris	882806	183212	30	31	13	18	5	1	4	10	4	6	0	26	12	14	3	5	3	2	2	23	21	9	12	7	10	21	9	12	20	9	11	0	0	0	0	0	0	72.22	2.42	26	0	0
23	Quintana Roo	4	Othón P. Blanco	221	El Cedralito	884416	185559	100	205	106	99	25	11	14	87	41	46	5	179	95	84	45	57	29	28	12	129	117	65	52	51	48	111	60	51	98	54	44	6	5	1	4	3	1	107.07	3.83	176	0	0
23	Quintana Roo	4	Othón P. Blanco	225	Luis Echeverría Álvarez	881306	183924	10	720	376	344	78	38	40	247	130	117	11	642	338	304	106	158	84	74	52	525	473	246	227	132	180	419	210	209	425	221	204	54	36	18	34	21	13	109.3	2.93	621	19	10
23	Quintana Roo	4	Othón P. Blanco	227	Dieciocho de Marzo	884828	190446	40	222	110	112	32	12	20	98	49	49	6	190	98	92	41	60	31	29	19	143	124	61	63	41	49	106	49	57	106	52	54	18	12	6	15	10	5	98.21	4.83	190	0	0
23	Quintana Roo	4	Othón P. Blanco	229	Dos Aguadas	890843	180734	150	205	98	107	23	12	11	85	38	47	5	182	86	96	38	57	25	32	19	139	120	60	60	49	54	113	57	56	100	51	49	7	3	4	2	2	0	91.59	3.17	176	4	3
23	Quintana Roo	4	Othón P. Blanco	231	El Edén	884351	184842	100	3	*	*	*	*	*	*	*	*	*	*	*	*	*	*	*	*	*	*	*	*	*	*	*	*	*	*	*	*	*	*	*	*	*	*	*	*	*	*	*	*
23	Quintana Roo	4	Othón P. Blanco	235	Francisco J. Mújica	884226	185910	50	98	50	48	9	4	5	33	16	17	2	87	45	42	13	22	11	11	9	72	63	33	30	24	25	55	28	27	52	28	24	8	5	3	3	2	1	104.17	3.88	86	0	0
23	Quintana Roo	4	Othón P. Blanco	238	Iturbide	883804	190235	40	123	57	66	23	9	14	67	29	38	5	100	48	52	24	39	18	21	15	71	56	28	28	16	23	52	25	27	49	26	23	4	3	1	2	1	1	86.36	5	87	11	6
23	Quintana Roo	4	Othón P. Blanco	240	Limonar	885236	184741	120	132	66	66	14	8	6	56	28	28	1	118	58	60	20	41	19	22	21	97	76	38	38	22	31	65	30	35	66	36	30	11	8	3	5	3	2	100	2.85	117	0	0
23	Quintana Roo	4	Othón P. Blanco	245	Morocoy	884839	183609	100	1106	533	573	100	55	45	445	235	210	25	1004	477	527	194	320	163	157	126	785	659	297	362	169	295	574	246	328	570	257	313	85	51	34	51	34	17	93.02	3.15	948	31	14
23	Quintana Roo	4	Othón P. Blanco	252	Nuevo Bécar	890750	184328	150	530	256	274	47	25	22	221	110	111	16	482	230	252	91	158	81	77	67	375	308	145	163	76	125	271	127	144	272	127	145	37	18	19	26	10	16	93.43	4.02	475	7	5
23	Quintana Roo	4	Othón P. Blanco	253	Nuevo Hoctún	884314	190431	40	13	7	6	1	0	1	6	3	3	1	12	7	5	4	4	3	1	0	7	7	4	3	0	2	6	3	3	7	4	3	1	1	0	0	0	0	116.67	4.5	12	0	0
23	Quintana Roo	4	Othón P. Blanco	255	El Progreso	883932	190450	50	137	65	72	20	9	11	45	23	22	2	117	56	61	14	23	13	10	9	101	92	42	50	29	38	83	36	47	80	38	42	9	6	3	8	5	3	90.28	3.74	112	5	3
23	Quintana Roo	4	Othón P. Blanco	259	Otilio Montaño	884956	190031	100	289	163	126	32	19	13	137	81	56	8	256	143	113	65	97	59	38	32	183	151	81	70	37	55	130	68	62	127	66	61	21	13	8	13	8	5	129.37	4.68	255	0	0
23	Quintana Roo	4	Othón P. Blanco	264	Raudales	881514	184236	10	177	89	88	21	7	14	58	27	31	5	156	82	74	20	32	19	13	12	131	119	62	57	30	45	101	52	49	110	56	54	18	10	8	13	9	4	101.14	3.15	151	4	2
23	Quintana Roo	4	Othón P. Blanco	265	Río Escondido	884513	185255	50	253	134	119	20	13	7	103	57	46	9	233	121	112	51	74	39	35	23	173	150	77	73	40	55	126	62	64	132	66	66	24	15	9	17	11	6	112.61	3.83	228	4	4
23	Quintana Roo	4	Othón P. Blanco	266	Río Verde	890218	190211	60	425	234	191	39	21	18	171	96	75	13	385	212	173	73	119	67	52	46	299	253	137	116	93	94	226	119	107	207	110	97	27	18	9	14	10	4	122.51	3.97	352	31	19
23	Quintana Roo	4	Othón P. Blanco	267	José Narciso Rovirosa	884338	180620	80	977	512	465	107	57	50	323	168	155	18	862	451	411	131	198	102	96	67	713	646	340	306	182	237	558	282	276	572	303	269	88	58	30	55	36	19	110.11	3.12	841	16	11
23	Quintana Roo	4	Othón P. Blanco	288	Calderas de Barlovento	875956	184018	3	7	7	0	0	0	0	0	0	0	0	7	7	0	0	0	0	0	0	7	7	7	0	0	0	5	5	0	7	7	0	2	2	0	1	1	0	*	*	7	0	0
23	Quintana Roo	4	Othón P. Blanco	290	Cinco de Mayo	890807	184715	100	73	40	33	7	1	6	28	13	15	1	66	39	27	14	20	12	8	6	51	45	27	18	18	16	40	24	16	40	24	16	5	3	2	5	3	2	121.21	2.95	65	0	0
23	Quintana Roo	4	Othón P. Blanco	298	El Gallito	885509	185909	100	74	46	28	4	3	1	25	18	7	3	68	41	27	13	18	12	6	5	52	47	26	21	22	19	42	21	21	41	23	18	5	5	0	4	4	0	164.29	3.81	68	0	0
23	Quintana Roo	4	Othón P. Blanco	301	Gustavo Díaz Ordaz	882404	191047	40	4	*	*	*	*	*	*	*	*	*	*	*	*	*	*	*	*	*	*	*	*	*	*	*	*	*	*	*	*	*	*	*	*	*	*	*	*	*	*	*	*
23	Quintana Roo	4	Othón P. Blanco	302	Isidro Fabela	885143	185434	120	49	23	26	4	1	3	19	7	12	0	45	22	23	10	15	6	9	5	35	30	16	14	6	10	23	10	13	28	16	12	7	6	1	4	4	0	88.46	3.06	45	0	0
23	Quintana Roo	4	Othón P. Blanco	303	La Libertad	885127	184538	120	421	217	204	32	15	17	171	91	80	13	389	202	187	77	126	67	59	49	299	250	126	124	100	105	228	113	115	202	102	100	22	13	9	16	8	8	106.37	3.1	387	0	0
23	Quintana Roo	4	Othón P. Blanco	305	Nuevo Caanán	890408	184919	100	123	63	60	15	6	9	54	26	28	2	108	57	51	26	37	20	17	11	80	69	37	32	34	25	63	33	30	55	28	27	6	4	2	3	1	2	105	3.11	95	13	8
23	Quintana Roo	4	Othón P. Blanco	308	Las Palmas	885115	181334	90	2	*	*	*	*	*	*	*	*	*	*	*	*	*	*	*	*	*	*	*	*	*	*	*	*	*	*	*	*	*	*	*	*	*	*	*	*	*	*	*	*
23	Quintana Roo	4	Othón P. Blanco	309	Payo Obispo	885536	185203	100	67	34	33	7	5	2	21	9	12	0	60	29	31	8	14	4	10	6	52	46	25	21	14	15	37	18	19	37	20	17	9	7	2	7	5	2	103.03	3.17	58	2	1
23	Quintana Roo	4	Othón P. Blanco	314	Punta Gavilán Uno	874806	182115	10	6	*	*	*	*	*	*	*	*	*	*	*	*	*	*	*	*	*	*	*	*	*	*	*	*	*	*	*	*	*	*	*	*	*	*	*	*	*	*	*	*
23	Quintana Roo	4	Othón P. Blanco	319	San José de la Montaña	890047	182224	150	153	89	64	16	10	6	47	26	21	2	137	79	58	17	29	14	15	12	118	106	63	43	39	34	87	48	39	89	56	33	19	15	4	13	10	3	139.06	3.41	136	1	0
23	Quintana Roo	4	Othón P. Blanco	327	Veracruz	890520	184411	140	136	76	60	17	13	4	39	23	16	2	103	55	48	13	20	9	11	7	88	81	45	36	33	31	74	39	35	65	35	30	7	6	1	2	2	0	126.67	3.07	103	0	0
23	Quintana Roo	4	Othón P. Blanco	328	Villa de Cortés	875416	185656	10	7	5	2	1	0	1	1	0	1	0	6	5	1	0	0	0	0	0	6	6	5	1	1	1	3	2	1	6	5	1	3	3	0	2	2	0	250	1	6	0	0
23	Quintana Roo	4	Othón P. Blanco	330	Tres Reyes	880350	185838	20	1	*	*	*	*	*	*	*	*	*	*	*	*	*	*	*	*	*	*	*	*	*	*	*	*	*	*	*	*	*	*	*	*	*	*	*	*	*	*	*	*
23	Quintana Roo	4	Othón P. Blanco	346	Valencia	882147	183046	10	3	*	*	*	*	*	*	*	*	*	*	*	*	*	*	*	*	*	*	*	*	*	*	*	*	*	*	*	*	*	*	*	*	*	*	*	*	*	*	*	*
23	Quintana Roo	4	Othón P. Blanco	363	Xahuachol	874532	183036	10	1	*	*	*	*	*	*	*	*	*	*	*	*	*	*	*	*	*	*	*	*	*	*	*	*	*	*	*	*	*	*	*	*	*	*	*	*	*	*	*	*
23	Quintana Roo	4	Othón P. Blanco	365	Xóchitl	882234	183102	10	9	*	*	*	*	*	*	*	*	*	*	*	*	*	*	*	*	*	*	*	*	*	*	*	*	*	*	*	*	*	*	*	*	*	*	*	*	*	*	*	*
23	Quintana Roo	4	Othón P. Blanco	372	California	890343	184609	100	42	22	20	2	0	2	15	7	8	2	40	22	18	7	11	5	6	4	31	27	15	12	9	8	21	11	10	21	12	9	6	4	2	3	1	2	110	5.55	39	0	0
23	Quintana Roo	4	Othón P. Blanco	383	Rancho Santuario	882908	183254	15	1	*	*	*	*	*	*	*	*	*	*	*	*	*	*	*	*	*	*	*	*	*	*	*	*	*	*	*	*	*	*	*	*	*	*	*	*	*	*	*	*
23	Quintana Roo	4	Othón P. Blanco	406	El Arca	882642	183541	25	5	*	*	*	*	*	*	*	*	*	*	*	*	*	*	*	*	*	*	*	*	*	*	*	*	*	*	*	*	*	*	*	*	*	*	*	*	*	*	*	*
23	Quintana Roo	4	Othón P. Blanco	419	Villa del Carmen	882424	183125	10	1	*	*	*	*	*	*	*	*	*	*	*	*	*	*	*	*	*	*	*	*	*	*	*	*	*	*	*	*	*	*	*	*	*	*	*	*	*	*	*	*
23	Quintana Roo	4	Othón P. Blanco	424	El Caballo Blanco	882505	183111	10	6	*	*	*	*	*	*	*	*	*	*	*	*	*	*	*	*	*	*	*	*	*	*	*	*	*	*	*	*	*	*	*	*	*	*	*	*	*	*	*	*
23	Quintana Roo	4	Othón P. Blanco	429	Caanán	884958	190900	40	91	40	51	13	2	11	38	17	21	0	76	36	40	17	25	15	10	8	59	51	21	30	18	24	46	19	27	42	18	24	5	2	3	2	1	1	78.43	3.32	76	0	0
23	Quintana Roo	4	Othón P. Blanco	431	El Capricho	873829	185208	10	2	*	*	*	*	*	*	*	*	*	*	*	*	*	*	*	*	*	*	*	*	*	*	*	*	*	*	*	*	*	*	*	*	*	*	*	*	*	*	*	*
23	Quintana Roo	4	Othón P. Blanco	433	El Cardenal	884903	182004	50	1	*	*	*	*	*	*	*	*	*	*	*	*	*	*	*	*	*	*	*	*	*	*	*	*	*	*	*	*	*	*	*	*	*	*	*	*	*	*	*	*
23	Quintana Roo	4	Othón P. Blanco	436	Punta Gruesa	873402	190342	5	2	*	*	*	*	*	*	*	*	*	*	*	*	*	*	*	*	*	*	*	*	*	*	*	*	*	*	*	*	*	*	*	*	*	*	*	*	*	*	*	*
23	Quintana Roo	4	Othón P. Blanco	439	Ubre Blanca	882710	184205	30	7	*	*	*	*	*	*	*	*	*	*	*	*	*	*	*	*	*	*	*	*	*	*	*	*	*	*	*	*	*	*	*	*	*	*	*	*	*	*	*	*
23	Quintana Roo	4	Othón P. Blanco	442	Cinco Hermanos	881737	184919	20	6	*	*	*	*	*	*	*	*	*	*	*	*	*	*	*	*	*	*	*	*	*	*	*	*	*	*	*	*	*	*	*	*	*	*	*	*	*	*	*	*
23	Quintana Roo	4	Othón P. Blanco	447	El Cedral	885833	184210	100	240	128	112	31	14	17	104	59	45	9	204	111	93	40	64	39	25	24	155	131	66	65	34	52	109	50	59	118	61	57	22	16	6	18	14	4	114.29	3.58	186	16	9
23	Quintana Roo	4	Othón P. Blanco	449	Colonia Aarón Merino	882319	184222	20	32	16	16	0	0	0	0	0	0	0	0	0	0	0	0	0	0	0	0	0	0	0	0	0	0	0	0	0	0	0	0	0	0	0	0	0	100	*	0	0	0
23	Quintana Roo	4	Othón P. Blanco	471	División del Sur	884147	184810	100	7	*	*	*	*	*	*	*	*	*	*	*	*	*	*	*	*	*	*	*	*	*	*	*	*	*	*	*	*	*	*	*	*	*	*	*	*	*	*	*	*
23	Quintana Roo	4	Othón P. Blanco	475	Emiliano Zapata	881534	183503	10	6	*	*	*	*	*	*	*	*	*	*	*	*	*	*	*	*	*	*	*	*	*	*	*	*	*	*	*	*	*	*	*	*	*	*	*	*	*	*	*	*
23	Quintana Roo	4	Othón P. Blanco	487	Esperanza	883417	184221	20	60	30	30	17	7	10	32	16	16	4	43	23	20	8	11	6	5	3	31	28	14	14	10	12	27	14	13	26	14	12	1	0	1	0	0	0	100	3.92	21	16	9
23	Quintana Roo	4	Othón P. Blanco	493	El Edén	882930	190743	30	4	*	*	*	*	*	*	*	*	*	*	*	*	*	*	*	*	*	*	*	*	*	*	*	*	*	*	*	*	*	*	*	*	*	*	*	*	*	*	*	*
23	Quintana Roo	4	Othón P. Blanco	509	La Esperanza	884127	182856	50	8	*	*	*	*	*	*	*	*	*	*	*	*	*	*	*	*	*	*	*	*	*	*	*	*	*	*	*	*	*	*	*	*	*	*	*	*	*	*	*	*
23	Quintana Roo	4	Othón P. Blanco	513	La Herradura	874333	183932	5	8	*	*	*	*	*	*	*	*	*	*	*	*	*	*	*	*	*	*	*	*	*	*	*	*	*	*	*	*	*	*	*	*	*	*	*	*	*	*	*	*
23	Quintana Roo	4	Othón P. Blanco	517	Los Cedros	881551	183751	10	2	*	*	*	*	*	*	*	*	*	*	*	*	*	*	*	*	*	*	*	*	*	*	*	*	*	*	*	*	*	*	*	*	*	*	*	*	*	*	*	*
23	Quintana Roo	4	Othón P. Blanco	523	El Henequén	874121	184607	10	2	*	*	*	*	*	*	*	*	*	*	*	*	*	*	*	*	*	*	*	*	*	*	*	*	*	*	*	*	*	*	*	*	*	*	*	*	*	*	*	*
23	Quintana Roo	4	Othón P. Blanco	524	San Carlos	874119	184610	10	11	*	*	*	*	*	*	*	*	*	*	*	*	*	*	*	*	*	*	*	*	*	*	*	*	*	*	*	*	*	*	*	*	*	*	*	*	*	*	*	*
23	Quintana Roo	4	Othón P. Blanco	542	Jesús Martínez Ross	884450	190336	40	121	61	60	12	4	8	46	22	24	1	109	57	52	22	33	18	15	11	86	75	39	36	29	32	70	36	34	67	37	30	5	3	2	5	3	2	101.67	3.18	108	0	0
23	Quintana Roo	4	Othón P. Blanco	546	Tanquilá	874549	182809	10	2	*	*	*	*	*	*	*	*	*	*	*	*	*	*	*	*	*	*	*	*	*	*	*	*	*	*	*	*	*	*	*	*	*	*	*	*	*	*	*	*
23	Quintana Roo	4	Othón P. Blanco	553	Unicornio	882914	183349	15	5	*	*	*	*	*	*	*	*	*	*	*	*	*	*	*	*	*	*	*	*	*	*	*	*	*	*	*	*	*	*	*	*	*	*	*	*	*	*	*	*
23	Quintana Roo	4	Othón P. Blanco	555	La Juventud	884933	181655	50	2	*	*	*	*	*	*	*	*	*	*	*	*	*	*	*	*	*	*	*	*	*	*	*	*	*	*	*	*	*	*	*	*	*	*	*	*	*	*	*	*
23	Quintana Roo	4	Othón P. Blanco	556	Kaluma	881522	183613	10	3	*	*	*	*	*	*	*	*	*	*	*	*	*	*	*	*	*	*	*	*	*	*	*	*	*	*	*	*	*	*	*	*	*	*	*	*	*	*	*	*
23	Quintana Roo	4	Othón P. Blanco	561	Kuchumatán	882424	185755	35	913	446	467	88	44	44	432	209	223	29	822	400	422	221	315	150	165	94	572	478	235	243	182	201	430	210	220	401	196	205	48	25	23	31	16	15	95.5	3.53	806	2	2
23	Quintana Roo	4	Othón P. Blanco	571	La Lupita	882202	183053	10	4	*	*	*	*	*	*	*	*	*	*	*	*	*	*	*	*	*	*	*	*	*	*	*	*	*	*	*	*	*	*	*	*	*	*	*	*	*	*	*	*
23	Quintana Roo	4	Othón P. Blanco	580	Martha Venecia	873827	185202	10	2	*	*	*	*	*	*	*	*	*	*	*	*	*	*	*	*	*	*	*	*	*	*	*	*	*	*	*	*	*	*	*	*	*	*	*	*	*	*	*	*
23	Quintana Roo	4	Othón P. Blanco	581	El Matorral	882147	183051	10	6	*	*	*	*	*	*	*	*	*	*	*	*	*	*	*	*	*	*	*	*	*	*	*	*	*	*	*	*	*	*	*	*	*	*	*	*	*	*	*	*
23	Quintana Roo	4	Othón P. Blanco	583	Maya Balam	882359	185621	40	2029	1051	978	286	141	145	963	502	461	76	1741	909	832	400	601	319	282	201	1265	1064	548	516	454	447	1012	524	488	885	454	431	52	24	28	31	12	19	107.46	3.31	1726	0	0
23	Quintana Roo	4	Othón P. Blanco	585	Rancho Ramonal	882943	184355	30	1	*	*	*	*	*	*	*	*	*	*	*	*	*	*	*	*	*	*	*	*	*	*	*	*	*	*	*	*	*	*	*	*	*	*	*	*	*	*	*	*
23	Quintana Roo	4	Othón P. Blanco	586	Melchor Ocampo	885633	190324	40	328	155	173	36	10	26	172	75	97	16	291	144	147	77	120	58	62	43	198	155	79	76	53	61	139	71	68	133	65	68	16	8	8	10	5	5	89.6	4.56	286	3	1
23	Quintana Roo	4	Othón P. Blanco	594	Monte Olivo	884547	191046	30	31	18	13	4	2	2	13	7	6	2	27	16	11	6	7	5	2	1	19	18	11	7	5	7	17	10	7	16	10	6	1	1	0	1	1	0	138.46	2.86	27	0	0
23	Quintana Roo	4	Othón P. Blanco	600	Las Ruinas	882626	190152	30	1	*	*	*	*	*	*	*	*	*	*	*	*	*	*	*	*	*	*	*	*	*	*	*	*	*	*	*	*	*	*	*	*	*	*	*	*	*	*	*	*
23	Quintana Roo	4	Othón P. Blanco	603	Los Nogales	874323	184528	10	1	*	*	*	*	*	*	*	*	*	*	*	*	*	*	*	*	*	*	*	*	*	*	*	*	*	*	*	*	*	*	*	*	*	*	*	*	*	*	*	*
23	Quintana Roo	4	Othón P. Blanco	604	Noh-bec	880853	190746	30	7	*	*	*	*	*	*	*	*	*	*	*	*	*	*	*	*	*	*	*	*	*	*	*	*	*	*	*	*	*	*	*	*	*	*	*	*	*	*	*	*
23	Quintana Roo	4	Othón P. Blanco	605	Icaiché	890944	180240	100	140	83	57	23	11	12	70	45	25	6	117	72	45	28	41	31	10	13	83	70	38	32	27	29	62	33	29	63	35	28	8	5	3	3	2	1	145.61	3.74	105	11	5
23	Quintana Roo	4	Othón P. Blanco	614	El Palomar	882039	183026	10	17	7	10	2	0	2	3	1	2	0	15	7	8	1	1	1	0	0	14	14	6	8	3	5	11	5	6	12	6	6	3	1	2	3	1	2	70	2.88	15	0	0
23	Quintana Roo	4	Othón P. Blanco	615	Las Dos Y	881526	183608	10	3	*	*	*	*	*	*	*	*	*	*	*	*	*	*	*	*	*	*	*	*	*	*	*	*	*	*	*	*	*	*	*	*	*	*	*	*	*	*	*	*
23	Quintana Roo	4	Othón P. Blanco	618	El Arca	881529	183540	10	4	*	*	*	*	*	*	*	*	*	*	*	*	*	*	*	*	*	*	*	*	*	*	*	*	*	*	*	*	*	*	*	*	*	*	*	*	*	*	*	*
23	Quintana Roo	4	Othón P. Blanco	619	El Paraíso	882540	183643	20	1	*	*	*	*	*	*	*	*	*	*	*	*	*	*	*	*	*	*	*	*	*	*	*	*	*	*	*	*	*	*	*	*	*	*	*	*	*	*	*	*
23	Quintana Roo	4	Othón P. Blanco	621	El Paraíso	882910	185833	40	1	*	*	*	*	*	*	*	*	*	*	*	*	*	*	*	*	*	*	*	*	*	*	*	*	*	*	*	*	*	*	*	*	*	*	*	*	*	*	*	*
23	Quintana Roo	4	Othón P. Blanco	623	El Paraíso	881526	183602	10	2	*	*	*	*	*	*	*	*	*	*	*	*	*	*	*	*	*	*	*	*	*	*	*	*	*	*	*	*	*	*	*	*	*	*	*	*	*	*	*	*
23	Quintana Roo	4	Othón P. Blanco	638	La Ponderosa	881626	184055	10	1	*	*	*	*	*	*	*	*	*	*	*	*	*	*	*	*	*	*	*	*	*	*	*	*	*	*	*	*	*	*	*	*	*	*	*	*	*	*	*	*
23	Quintana Roo	4	Othón P. Blanco	639	Seis Hermanos (El Ranchito)	885321	182734	130	6	*	*	*	*	*	*	*	*	*	*	*	*	*	*	*	*	*	*	*	*	*	*	*	*	*	*	*	*	*	*	*	*	*	*	*	*	*	*	*	*
23	Quintana Roo	4	Othón P. Blanco	640	El Porvenir	882137	183043	10	5	*	*	*	*	*	*	*	*	*	*	*	*	*	*	*	*	*	*	*	*	*	*	*	*	*	*	*	*	*	*	*	*	*	*	*	*	*	*	*	*
23	Quintana Roo	4	Othón P. Blanco	641	El Porvenir (La Pila)	885802	183425	130	1	*	*	*	*	*	*	*	*	*	*	*	*	*	*	*	*	*	*	*	*	*	*	*	*	*	*	*	*	*	*	*	*	*	*	*	*	*	*	*	*
23	Quintana Roo	4	Othón P. Blanco	657	Valher	882717	183435	25	13	*	*	*	*	*	*	*	*	*	*	*	*	*	*	*	*	*	*	*	*	*	*	*	*	*	*	*	*	*	*	*	*	*	*	*	*	*	*	*	*
23	Quintana Roo	4	Othón P. Blanco	658	Las SS	884159	184831	100	11	4	7	3	1	2	5	1	4	1	8	3	5	1	1	0	1	0	6	6	3	3	3	3	6	3	3	5	3	2	0	0	0	0	0	0	57.14	1.67	8	0	0
23	Quintana Roo	4	Othón P. Blanco	671	El Rosal	882204	183047	10	11	*	*	*	*	*	*	*	*	*	*	*	*	*	*	*	*	*	*	*	*	*	*	*	*	*	*	*	*	*	*	*	*	*	*	*	*	*	*	*	*
23	Quintana Roo	4	Othón P. Blanco	680	La Finca	883505	182205	50	1	*	*	*	*	*	*	*	*	*	*	*	*	*	*	*	*	*	*	*	*	*	*	*	*	*	*	*	*	*	*	*	*	*	*	*	*	*	*	*	*
23	Quintana Roo	4	Othón P. Blanco	681	Sac Nicté	882113	183034	10	5	*	*	*	*	*	*	*	*	*	*	*	*	*	*	*	*	*	*	*	*	*	*	*	*	*	*	*	*	*	*	*	*	*	*	*	*	*	*	*	*
23	Quintana Roo	4	Othón P. Blanco	689	San Silvestre	882631	183613	25	3	*	*	*	*	*	*	*	*	*	*	*	*	*	*	*	*	*	*	*	*	*	*	*	*	*	*	*	*	*	*	*	*	*	*	*	*	*	*	*	*
23	Quintana Roo	4	Othón P. Blanco	690	Sinaí	881527	183534	10	8	*	*	*	*	*	*	*	*	*	*	*	*	*	*	*	*	*	*	*	*	*	*	*	*	*	*	*	*	*	*	*	*	*	*	*	*	*	*	*	*
23	Quintana Roo	4	Othón P. Blanco	694	Sol y Mar	874020	184633	10	3	*	*	*	*	*	*	*	*	*	*	*	*	*	*	*	*	*	*	*	*	*	*	*	*	*	*	*	*	*	*	*	*	*	*	*	*	*	*	*	*
23	Quintana Roo	4	Othón P. Blanco	703	San Armando	882153	183053	10	5	*	*	*	*	*	*	*	*	*	*	*	*	*	*	*	*	*	*	*	*	*	*	*	*	*	*	*	*	*	*	*	*	*	*	*	*	*	*	*	*
23	Quintana Roo	4	Othón P. Blanco	704	San Arturo	873928	185000	10	4	*	*	*	*	*	*	*	*	*	*	*	*	*	*	*	*	*	*	*	*	*	*	*	*	*	*	*	*	*	*	*	*	*	*	*	*	*	*	*	*
23	Quintana Roo	4	Othón P. Blanco	716	San Juan	881010	190320	25	5	*	*	*	*	*	*	*	*	*	*	*	*	*	*	*	*	*	*	*	*	*	*	*	*	*	*	*	*	*	*	*	*	*	*	*	*	*	*	*	*
23	Quintana Roo	4	Othón P. Blanco	725	San Martín de Porres	881532	183527	10	3	*	*	*	*	*	*	*	*	*	*	*	*	*	*	*	*	*	*	*	*	*	*	*	*	*	*	*	*	*	*	*	*	*	*	*	*	*	*	*	*
23	Quintana Roo	4	Othón P. Blanco	732	Cox Farms	882319	183110	10	1	*	*	*	*	*	*	*	*	*	*	*	*	*	*	*	*	*	*	*	*	*	*	*	*	*	*	*	*	*	*	*	*	*	*	*	*	*	*	*	*
23	Quintana Roo	4	Othón P. Blanco	734	San Tino	882550	183706	15	10	4	6	2	1	1	4	1	3	0	8	3	5	1	2	0	2	1	7	6	3	3	0	2	4	2	2	6	3	3	2	1	1	1	1	0	66.67	3	8	0	0
23	Quintana Roo	4	Othón P. Blanco	739	Santa Julia	874811	182108	5	4	*	*	*	*	*	*	*	*	*	*	*	*	*	*	*	*	*	*	*	*	*	*	*	*	*	*	*	*	*	*	*	*	*	*	*	*	*	*	*	*
23	Quintana Roo	4	Othón P. Blanco	741	Santa María	882153	183046	10	7	*	*	*	*	*	*	*	*	*	*	*	*	*	*	*	*	*	*	*	*	*	*	*	*	*	*	*	*	*	*	*	*	*	*	*	*	*	*	*	*
23	Quintana Roo	4	Othón P. Blanco	742	Las Olas Tranquilas	874335	183924	5	2	*	*	*	*	*	*	*	*	*	*	*	*	*	*	*	*	*	*	*	*	*	*	*	*	*	*	*	*	*	*	*	*	*	*	*	*	*	*	*	*
23	Quintana Roo	4	Othón P. Blanco	743	Santa Rosa	891150	180042	130	153	74	79	18	5	13	49	19	30	0	135	69	66	20	31	14	17	11	115	104	55	49	22	40	88	43	45	93	49	44	16	12	4	12	9	3	93.67	2.96	130	4	2
23	Quintana Roo	4	Othón P. Blanco	745	Santa Teresa	881404	183519	5	1	*	*	*	*	*	*	*	*	*	*	*	*	*	*	*	*	*	*	*	*	*	*	*	*	*	*	*	*	*	*	*	*	*	*	*	*	*	*	*	*
23	Quintana Roo	4	Othón P. Blanco	750	Don Jacobo	874544	182844	10	1	*	*	*	*	*	*	*	*	*	*	*	*	*	*	*	*	*	*	*	*	*	*	*	*	*	*	*	*	*	*	*	*	*	*	*	*	*	*	*	*
23	Quintana Roo	4	Othón P. Blanco	791	Carolina	885248	175751	100	2	*	*	*	*	*	*	*	*	*	*	*	*	*	*	*	*	*	*	*	*	*	*	*	*	*	*	*	*	*	*	*	*	*	*	*	*	*	*	*	*
23	Quintana Roo	4	Othón P. Blanco	800	Pedro Joaquín Coldwell	883941	181520	50	849	446	403	94	53	41	335	175	160	19	755	393	362	141	222	111	111	81	595	514	271	243	159	206	464	242	222	448	230	218	50	29	21	34	20	14	110.67	3.15	699	52	24
23	Quintana Roo	4	Othón P. Blanco	813	Corozal	885026	181939	50	1	*	*	*	*	*	*	*	*	*	*	*	*	*	*	*	*	*	*	*	*	*	*	*	*	*	*	*	*	*	*	*	*	*	*	*	*	*	*	*	*
23	Quintana Roo	4	Othón P. Blanco	818	La Aventura	882243	183104	10	2	*	*	*	*	*	*	*	*	*	*	*	*	*	*	*	*	*	*	*	*	*	*	*	*	*	*	*	*	*	*	*	*	*	*	*	*	*	*	*	*
23	Quintana Roo	4	Othón P. Blanco	819	Buenos Aires	882256	183016	10	6	*	*	*	*	*	*	*	*	*	*	*	*	*	*	*	*	*	*	*	*	*	*	*	*	*	*	*	*	*	*	*	*	*	*	*	*	*	*	*	*
23	Quintana Roo	4	Othón P. Blanco	821	Kilómetro 10	882331	183059	10	5	*	*	*	*	*	*	*	*	*	*	*	*	*	*	*	*	*	*	*	*	*	*	*	*	*	*	*	*	*	*	*	*	*	*	*	*	*	*	*	*
23	Quintana Roo	4	Othón P. Blanco	823	La Conchita	882251	183031	10	14	9	5	1	0	1	3	1	2	0	13	9	4	2	2	1	1	0	11	11	8	3	5	2	10	8	2	10	7	3	1	0	1	1	0	1	180	6.67	13	0	0
23	Quintana Roo	4	Othón P. Blanco	824	Minisuper Karen Edith	882220	183058	10	12	6	6	0	0	0	0	0	0	0	0	0	0	0	0	0	0	0	0	0	0	0	0	0	0	0	0	0	0	0	0	0	0	0	0	0	100	*	0	0	0
23	Quintana Roo	4	Othón P. Blanco	826	Los Encinos	882232	183033	10	3	*	*	*	*	*	*	*	*	*	*	*	*	*	*	*	*	*	*	*	*	*	*	*	*	*	*	*	*	*	*	*	*	*	*	*	*	*	*	*	*
23	Quintana Roo	4	Othón P. Blanco	829	Las Flores	882257	183025	10	4	*	*	*	*	*	*	*	*	*	*	*	*	*	*	*	*	*	*	*	*	*	*	*	*	*	*	*	*	*	*	*	*	*	*	*	*	*	*	*	*
23	Quintana Roo	4	Othón P. Blanco	830	Hermanos Lagos	882253	183029	10	13	*	*	*	*	*	*	*	*	*	*	*	*	*	*	*	*	*	*	*	*	*	*	*	*	*	*	*	*	*	*	*	*	*	*	*	*	*	*	*	*
23	Quintana Roo	4	Othón P. Blanco	831	Los Darza	881753	183223	10	2	*	*	*	*	*	*	*	*	*	*	*	*	*	*	*	*	*	*	*	*	*	*	*	*	*	*	*	*	*	*	*	*	*	*	*	*	*	*	*	*
23	Quintana Roo	4	Othón P. Blanco	838	El Naranjal	882306	183016	10	4	*	*	*	*	*	*	*	*	*	*	*	*	*	*	*	*	*	*	*	*	*	*	*	*	*	*	*	*	*	*	*	*	*	*	*	*	*	*	*	*
23	Quintana Roo	4	Othón P. Blanco	839	El Paraíso	882232	183051	10	3	*	*	*	*	*	*	*	*	*	*	*	*	*	*	*	*	*	*	*	*	*	*	*	*	*	*	*	*	*	*	*	*	*	*	*	*	*	*	*	*
23	Quintana Roo	4	Othón P. Blanco	840	Parque Industrial	882445	183124	10	8	5	3	1	0	1	1	0	1	0	7	5	2	0	0	0	0	0	7	7	5	2	1	1	6	4	2	7	5	2	1	1	0	0	0	0	166.67	2.5	4	3	2
23	Quintana Roo	4	Othón P. Blanco	843	Hermanos Martínez	882228	183100	10	5	*	*	*	*	*	*	*	*	*	*	*	*	*	*	*	*	*	*	*	*	*	*	*	*	*	*	*	*	*	*	*	*	*	*	*	*	*	*	*	*
23	Quintana Roo	4	Othón P. Blanco	854	Calquín	881453	183356	5	4	*	*	*	*	*	*	*	*	*	*	*	*	*	*	*	*	*	*	*	*	*	*	*	*	*	*	*	*	*	*	*	*	*	*	*	*	*	*	*	*
23	Quintana Roo	4	Othón P. Blanco	856	Cantarranas	882052	183001	10	1	*	*	*	*	*	*	*	*	*	*	*	*	*	*	*	*	*	*	*	*	*	*	*	*	*	*	*	*	*	*	*	*	*	*	*	*	*	*	*	*
23	Quintana Roo	4	Othón P. Blanco	859	La Cocotina	881545	183216	5	4	*	*	*	*	*	*	*	*	*	*	*	*	*	*	*	*	*	*	*	*	*	*	*	*	*	*	*	*	*	*	*	*	*	*	*	*	*	*	*	*
23	Quintana Roo	4	Othón P. Blanco	865	Felipe Hobbes	881449	183355	5	2	*	*	*	*	*	*	*	*	*	*	*	*	*	*	*	*	*	*	*	*	*	*	*	*	*	*	*	*	*	*	*	*	*	*	*	*	*	*	*	*
23	Quintana Roo	4	Othón P. Blanco	880	Héctor Esquiliano Solís	881452	183352	5	3	*	*	*	*	*	*	*	*	*	*	*	*	*	*	*	*	*	*	*	*	*	*	*	*	*	*	*	*	*	*	*	*	*	*	*	*	*	*	*	*
23	Quintana Roo	4	Othón P. Blanco	883	Luis Buenfil	881452	183353	10	1	*	*	*	*	*	*	*	*	*	*	*	*	*	*	*	*	*	*	*	*	*	*	*	*	*	*	*	*	*	*	*	*	*	*	*	*	*	*	*	*
23	Quintana Roo	4	Othón P. Blanco	900	Las Margaritas	881545	183344	5	6	*	*	*	*	*	*	*	*	*	*	*	*	*	*	*	*	*	*	*	*	*	*	*	*	*	*	*	*	*	*	*	*	*	*	*	*	*	*	*	*
23	Quintana Roo	4	Othón P. Blanco	908	El Pedregal	881557	183304	10	11	5	6	0	0	0	2	1	1	0	11	5	6	1	2	1	1	1	10	9	4	5	1	3	7	3	4	9	4	5	2	1	1	2	1	1	83.33	2.67	11	0	0
23	Quintana Roo	4	Othón P. Blanco	912	San Andrés	882045	183032	10	4	*	*	*	*	*	*	*	*	*	*	*	*	*	*	*	*	*	*	*	*	*	*	*	*	*	*	*	*	*	*	*	*	*	*	*	*	*	*	*	*
23	Quintana Roo	4	Othón P. Blanco	914	Francisco Godoy	882105	183031	10	4	*	*	*	*	*	*	*	*	*	*	*	*	*	*	*	*	*	*	*	*	*	*	*	*	*	*	*	*	*	*	*	*	*	*	*	*	*	*	*	*
23	Quintana Roo	4	Othón P. Blanco	917	San Martín	881607	183250	10	15	6	9	0	0	0	2	0	2	0	15	6	9	1	2	0	2	1	14	13	6	7	4	7	12	5	7	10	6	4	1	1	0	1	1	0	66.67	1.5	13	2	1
23	Quintana Roo	4	Othón P. Blanco	918	Douglas	881348	183548	10	1	*	*	*	*	*	*	*	*	*	*	*	*	*	*	*	*	*	*	*	*	*	*	*	*	*	*	*	*	*	*	*	*	*	*	*	*	*	*	*	*
23	Quintana Roo	4	Othón P. Blanco	919	San Marcos	882100	183030	10	14	*	*	*	*	*	*	*	*	*	*	*	*	*	*	*	*	*	*	*	*	*	*	*	*	*	*	*	*	*	*	*	*	*	*	*	*	*	*	*	*
23	Quintana Roo	4	Othón P. Blanco	922	Rancho Chico	882105	183200	10	1	*	*	*	*	*	*	*	*	*	*	*	*	*	*	*	*	*	*	*	*	*	*	*	*	*	*	*	*	*	*	*	*	*	*	*	*	*	*	*	*
23	Quintana Roo	4	Othón P. Blanco	926	Missie	881534	183245	5	6	*	*	*	*	*	*	*	*	*	*	*	*	*	*	*	*	*	*	*	*	*	*	*	*	*	*	*	*	*	*	*	*	*	*	*	*	*	*	*	*
23	Quintana Roo	4	Othón P. Blanco	931	El Esfuerzo	881516	183713	10	1	*	*	*	*	*	*	*	*	*	*	*	*	*	*	*	*	*	*	*	*	*	*	*	*	*	*	*	*	*	*	*	*	*	*	*	*	*	*	*	*
23	Quintana Roo	4	Othón P. Blanco	939	San Martín	881845	184802	15	4	*	*	*	*	*	*	*	*	*	*	*	*	*	*	*	*	*	*	*	*	*	*	*	*	*	*	*	*	*	*	*	*	*	*	*	*	*	*	*	*
23	Quintana Roo	4	Othón P. Blanco	944	Los Tamarindos	881540	183421	10	1	*	*	*	*	*	*	*	*	*	*	*	*	*	*	*	*	*	*	*	*	*	*	*	*	*	*	*	*	*	*	*	*	*	*	*	*	*	*	*	*
23	Quintana Roo	4	Othón P. Blanco	955	Rancho Alegre	882633	183456	25	5	*	*	*	*	*	*	*	*	*	*	*	*	*	*	*	*	*	*	*	*	*	*	*	*	*	*	*	*	*	*	*	*	*	*	*	*	*	*	*	*
23	Quintana Roo	4	Othón P. Blanco	959	La Flor	882805	183227	30	6	*	*	*	*	*	*	*	*	*	*	*	*	*	*	*	*	*	*	*	*	*	*	*	*	*	*	*	*	*	*	*	*	*	*	*	*	*	*	*	*
23	Quintana Roo	4	Othón P. Blanco	969	Hermanos Cantú	883125	183101	15	6	*	*	*	*	*	*	*	*	*	*	*	*	*	*	*	*	*	*	*	*	*	*	*	*	*	*	*	*	*	*	*	*	*	*	*	*	*	*	*	*
23	Quintana Roo	4	Othón P. Blanco	973	San Pablo	883115	183053	30	8	*	*	*	*	*	*	*	*	*	*	*	*	*	*	*	*	*	*	*	*	*	*	*	*	*	*	*	*	*	*	*	*	*	*	*	*	*	*	*	*
23	Quintana Roo	4	Othón P. Blanco	984	Rancho Nuevo	890742	184722	100	6	*	*	*	*	*	*	*	*	*	*	*	*	*	*	*	*	*	*	*	*	*	*	*	*	*	*	*	*	*	*	*	*	*	*	*	*	*	*	*	*
23	Quintana Roo	4	Othón P. Blanco	991	Lázaro Cárdenas del Río Tercero	884711	185828	100	204	107	97	26	11	15	88	50	38	7	178	96	82	41	55	34	21	14	130	116	57	59	38	50	102	49	53	100	52	48	14	8	6	12	7	5	110.31	3.03	172	1	0
23	Quintana Roo	4	Othón P. Blanco	1001	Ernesto Chejín Medina	873928	185014	5	3	*	*	*	*	*	*	*	*	*	*	*	*	*	*	*	*	*	*	*	*	*	*	*	*	*	*	*	*	*	*	*	*	*	*	*	*	*	*	*	*
23	Quintana Roo	4	Othón P. Blanco	1003	Costa de Cocos	875001	181723	5	2	*	*	*	*	*	*	*	*	*	*	*	*	*	*	*	*	*	*	*	*	*	*	*	*	*	*	*	*	*	*	*	*	*	*	*	*	*	*	*	*
23	Quintana Roo	4	Othón P. Blanco	1013	Playa Sonrisa	874902	182005	10	4	*	*	*	*	*	*	*	*	*	*	*	*	*	*	*	*	*	*	*	*	*	*	*	*	*	*	*	*	*	*	*	*	*	*	*	*	*	*	*	*
23	Quintana Roo	4	Othón P. Blanco	1033	El Castillo	874354	183727	5	4	*	*	*	*	*	*	*	*	*	*	*	*	*	*	*	*	*	*	*	*	*	*	*	*	*	*	*	*	*	*	*	*	*	*	*	*	*	*	*	*
23	Quintana Roo	4	Othón P. Blanco	1042	Miguel Alemán	890536	185449	100	505	272	233	40	21	19	230	127	103	16	464	251	213	115	174	97	77	59	333	274	145	129	64	99	233	120	113	245	129	116	41	25	16	27	15	12	116.74	4.17	445	15	8
23	Quintana Roo	4	Othón P. Blanco	1075	INIFAP	882717	184250	15	1	*	*	*	*	*	*	*	*	*	*	*	*	*	*	*	*	*	*	*	*	*	*	*	*	*	*	*	*	*	*	*	*	*	*	*	*	*	*	*	*
23	Quintana Roo	4	Othón P. Blanco	1077	San Isidro la Laguna	882214	184841	15	765	378	387	98	48	50	380	186	194	16	667	330	337	184	266	129	137	82	467	385	192	193	154	169	363	183	180	303	151	152	22	9	13	17	7	10	97.67	3.88	659	4	2
23	Quintana Roo	4	Othón P. Blanco	1078	Valentín Gómez Farías	885735	190726	10	39	21	18	5	3	2	25	13	12	3	34	18	16	10	17	9	8	7	21	14	8	6	3	5	12	6	6	13	8	5	2	2	0	2	2	0	116.67	3.56	34	0	0
23	Quintana Roo	4	Othón P. Blanco	1079	Nuevo Tabasco	890248	190820	10	121	66	55	9	4	5	54	27	27	4	112	62	50	26	41	20	21	15	82	67	39	28	21	23	57	33	24	58	32	26	10	6	4	8	5	3	120	4.32	97	14	11
23	Quintana Roo	4	Othón P. Blanco	1080	Año Nuevo	883230	184224	30	22	12	10	3	3	0	13	7	6	1	19	9	10	6	9	4	5	3	12	9	5	4	3	4	9	5	4	7	4	3	0	0	0	0	0	0	120	4	19	0	0
23	Quintana Roo	4	Othón P. Blanco	1089	Agua Blanca	884639	180253	80	1	*	*	*	*	*	*	*	*	*	*	*	*	*	*	*	*	*	*	*	*	*	*	*	*	*	*	*	*	*	*	*	*	*	*	*	*	*	*	*	*
23	Quintana Roo	4	Othón P. Blanco	1105	Kilómetro Cincuenta y Cinco	874238	184349	5	129	75	54	18	8	10	47	23	24	1	111	67	44	13	28	15	13	15	97	82	52	30	25	28	80	50	30	78	49	29	2	2	0	0	0	0	138.89	2.97	97	13	8
23	Quintana Roo	4	Othón P. Blanco	1111	Corredor Frutícola	880635	190428	20	58	31	27	5	2	3	18	10	8	1	53	29	24	7	12	8	4	5	45	40	21	19	14	15	32	17	15	34	16	18	8	4	4	6	3	3	114.81	3.6	47	3	2
23	Quintana Roo	4	Othón P. Blanco	1114	El Teco	885012	181940	50	1	*	*	*	*	*	*	*	*	*	*	*	*	*	*	*	*	*	*	*	*	*	*	*	*	*	*	*	*	*	*	*	*	*	*	*	*	*	*	*	*
23	Quintana Roo	4	Othón P. Blanco	1116	Las Tres Marías	883017	183428	30	6	*	*	*	*	*	*	*	*	*	*	*	*	*	*	*	*	*	*	*	*	*	*	*	*	*	*	*	*	*	*	*	*	*	*	*	*	*	*	*	*
23	Quintana Roo	4	Othón P. Blanco	1118	Villa de Guadalupe	882912	183246	15	3	*	*	*	*	*	*	*	*	*	*	*	*	*	*	*	*	*	*	*	*	*	*	*	*	*	*	*	*	*	*	*	*	*	*	*	*	*	*	*	*
23	Quintana Roo	4	Othón P. Blanco	1119	El Manguito	884852	183446	100	9	4	5	1	0	1	3	1	2	0	8	4	4	1	2	1	1	1	7	6	3	3	0	2	4	2	2	6	3	3	2	1	1	2	1	1	80	4	8	0	0
23	Quintana Roo	4	Othón P. Blanco	1120	San Pedro	881411	185318	20	8	*	*	*	*	*	*	*	*	*	*	*	*	*	*	*	*	*	*	*	*	*	*	*	*	*	*	*	*	*	*	*	*	*	*	*	*	*	*	*	*
23	Quintana Roo	4	Othón P. Blanco	1121	Jesús, María y José	881359	185343	20	2	*	*	*	*	*	*	*	*	*	*	*	*	*	*	*	*	*	*	*	*	*	*	*	*	*	*	*	*	*	*	*	*	*	*	*	*	*	*	*	*
23	Quintana Roo	4	Othón P. Blanco	1124	Tres Hermanos	890302	184521	90	2	*	*	*	*	*	*	*	*	*	*	*	*	*	*	*	*	*	*	*	*	*	*	*	*	*	*	*	*	*	*	*	*	*	*	*	*	*	*	*	*
23	Quintana Roo	4	Othón P. Blanco	1146	La Choca	881648	183439	10	2	*	*	*	*	*	*	*	*	*	*	*	*	*	*	*	*	*	*	*	*	*	*	*	*	*	*	*	*	*	*	*	*	*	*	*	*	*	*	*	*
23	Quintana Roo	4	Othón P. Blanco	1156	El Arrecife	874538	183004	5	1	*	*	*	*	*	*	*	*	*	*	*	*	*	*	*	*	*	*	*	*	*	*	*	*	*	*	*	*	*	*	*	*	*	*	*	*	*	*	*	*
23	Quintana Roo	4	Othón P. Blanco	1162	Rancho Encantado	882242	184258	15	1	*	*	*	*	*	*	*	*	*	*	*	*	*	*	*	*	*	*	*	*	*	*	*	*	*	*	*	*	*	*	*	*	*	*	*	*	*	*	*	*
23	Quintana Roo	4	Othón P. Blanco	1173	Xtomoc Uno	881914	184726	15	11	*	*	*	*	*	*	*	*	*	*	*	*	*	*	*	*	*	*	*	*	*	*	*	*	*	*	*	*	*	*	*	*	*	*	*	*	*	*	*	*
23	Quintana Roo	4	Othón P. Blanco	1175	Río Huache	874554	182529	5	2	*	*	*	*	*	*	*	*	*	*	*	*	*	*	*	*	*	*	*	*	*	*	*	*	*	*	*	*	*	*	*	*	*	*	*	*	*	*	*	*
23	Quintana Roo	4	Othón P. Blanco	1184	San José	874745	182209	15	14	*	*	*	*	*	*	*	*	*	*	*	*	*	*	*	*	*	*	*	*	*	*	*	*	*	*	*	*	*	*	*	*	*	*	*	*	*	*	*	*
23	Quintana Roo	4	Othón P. Blanco	1212	Casa Carolina	874954	181757	5	4	*	*	*	*	*	*	*	*	*	*	*	*	*	*	*	*	*	*	*	*	*	*	*	*	*	*	*	*	*	*	*	*	*	*	*	*	*	*	*	*
23	Quintana Roo	4	Othón P. Blanco	1220	Cielos Azules	874756	182151	10	1	*	*	*	*	*	*	*	*	*	*	*	*	*	*	*	*	*	*	*	*	*	*	*	*	*	*	*	*	*	*	*	*	*	*	*	*	*	*	*	*
23	Quintana Roo	4	Othón P. Blanco	1221	Xkan-Lol	881605	183254	5	6	*	*	*	*	*	*	*	*	*	*	*	*	*	*	*	*	*	*	*	*	*	*	*	*	*	*	*	*	*	*	*	*	*	*	*	*	*	*	*	*
23	Quintana Roo	4	Othón P. Blanco	1224	Armando Rodríguez	882302	183100	10	5	*	*	*	*	*	*	*	*	*	*	*	*	*	*	*	*	*	*	*	*	*	*	*	*	*	*	*	*	*	*	*	*	*	*	*	*	*	*	*	*
23	Quintana Roo	4	Othón P. Blanco	1231	Altamira	882157	183047	10	5	*	*	*	*	*	*	*	*	*	*	*	*	*	*	*	*	*	*	*	*	*	*	*	*	*	*	*	*	*	*	*	*	*	*	*	*	*	*	*	*
23	Quintana Roo	4	Othón P. Blanco	1253	Aarón Merino	882249	184245	15	18	10	8	0	0	0	1	0	1	0	18	10	8	0	1	0	1	1	18	17	10	7	5	6	13	7	6	15	10	5	4	3	1	3	3	0	125	2	18	0	0
23	Quintana Roo	4	Othón P. Blanco	1254	La Calavera	884952	182026	100	1	*	*	*	*	*	*	*	*	*	*	*	*	*	*	*	*	*	*	*	*	*	*	*	*	*	*	*	*	*	*	*	*	*	*	*	*	*	*	*	*
23	Quintana Roo	4	Othón P. Blanco	1258	El Admirable	885219	175601	70	4	*	*	*	*	*	*	*	*	*	*	*	*	*	*	*	*	*	*	*	*	*	*	*	*	*	*	*	*	*	*	*	*	*	*	*	*	*	*	*	*
23	Quintana Roo	4	Othón P. Blanco	1261	Las Tres Potrancas	883645	181914	50	1	*	*	*	*	*	*	*	*	*	*	*	*	*	*	*	*	*	*	*	*	*	*	*	*	*	*	*	*	*	*	*	*	*	*	*	*	*	*	*	*
23	Quintana Roo	4	Othón P. Blanco	1268	Cubano	881452	183749	10	6	*	*	*	*	*	*	*	*	*	*	*	*	*	*	*	*	*	*	*	*	*	*	*	*	*	*	*	*	*	*	*	*	*	*	*	*	*	*	*	*
23	Quintana Roo	4	Othón P. Blanco	1278	El Resbalón	890035	182400	100	1	*	*	*	*	*	*	*	*	*	*	*	*	*	*	*	*	*	*	*	*	*	*	*	*	*	*	*	*	*	*	*	*	*	*	*	*	*	*	*	*
23	Quintana Roo	4	Othón P. Blanco	1279	Anastacio Valdez Huchin	880644	190010	25	15	8	7	1	1	0	7	3	4	1	14	7	7	3	5	2	3	2	10	8	5	3	2	2	7	5	2	7	4	3	1	0	1	0	0	0	114.29	4	14	0	0
23	Quintana Roo	4	Othón P. Blanco	1280	El Ruiseñor	882133	183206	10	4	*	*	*	*	*	*	*	*	*	*	*	*	*	*	*	*	*	*	*	*	*	*	*	*	*	*	*	*	*	*	*	*	*	*	*	*	*	*	*	*
23	Quintana Roo	4	Othón P. Blanco	1288	Arturo Martínez Colorado	882302	184226	15	8	*	*	*	*	*	*	*	*	*	*	*	*	*	*	*	*	*	*	*	*	*	*	*	*	*	*	*	*	*	*	*	*	*	*	*	*	*	*	*	*
23	Quintana Roo	4	Othón P. Blanco	1294	Bacalar Dos	883254	184528	30	16	8	8	1	1	0	8	4	4	1	15	7	8	3	6	2	4	3	11	8	4	4	2	4	8	4	4	8	4	4	0	0	0	0	0	0	100	2	4	11	5
23	Quintana Roo	4	Othón P. Blanco	1295	Bacalar Uno	883141	184608	30	7	*	*	*	*	*	*	*	*	*	*	*	*	*	*	*	*	*	*	*	*	*	*	*	*	*	*	*	*	*	*	*	*	*	*	*	*	*	*	*	*
23	Quintana Roo	4	Othón P. Blanco	1297	Las Tres Balbinas	882611	183059	10	5	*	*	*	*	*	*	*	*	*	*	*	*	*	*	*	*	*	*	*	*	*	*	*	*	*	*	*	*	*	*	*	*	*	*	*	*	*	*	*	*
23	Quintana Roo	4	Othón P. Blanco	1312	Las Bugambilias	882015	183202	10	4	*	*	*	*	*	*	*	*	*	*	*	*	*	*	*	*	*	*	*	*	*	*	*	*	*	*	*	*	*	*	*	*	*	*	*	*	*	*	*	*
23	Quintana Roo	4	Othón P. Blanco	1314	Cámara	882704	184418	15	3	*	*	*	*	*	*	*	*	*	*	*	*	*	*	*	*	*	*	*	*	*	*	*	*	*	*	*	*	*	*	*	*	*	*	*	*	*	*	*	*
23	Quintana Roo	4	Othón P. Blanco	1317	La Candelaria	882605	185426	40	5	*	*	*	*	*	*	*	*	*	*	*	*	*	*	*	*	*	*	*	*	*	*	*	*	*	*	*	*	*	*	*	*	*	*	*	*	*	*	*	*
23	Quintana Roo	4	Othón P. Blanco	1321	La Carmelita	882520	184304	25	1	*	*	*	*	*	*	*	*	*	*	*	*	*	*	*	*	*	*	*	*	*	*	*	*	*	*	*	*	*	*	*	*	*	*	*	*	*	*	*	*
23	Quintana Roo	4	Othón P. Blanco	1332	El Chontal	882418	183228	10	1	*	*	*	*	*	*	*	*	*	*	*	*	*	*	*	*	*	*	*	*	*	*	*	*	*	*	*	*	*	*	*	*	*	*	*	*	*	*	*	*
23	Quintana Roo	4	Othón P. Blanco	1337	La Soledad	884915	181958	50	1	*	*	*	*	*	*	*	*	*	*	*	*	*	*	*	*	*	*	*	*	*	*	*	*	*	*	*	*	*	*	*	*	*	*	*	*	*	*	*	*
23	Quintana Roo	4	Othón P. Blanco	1345	Cec-May	874333	183929	10	3	*	*	*	*	*	*	*	*	*	*	*	*	*	*	*	*	*	*	*	*	*	*	*	*	*	*	*	*	*	*	*	*	*	*	*	*	*	*	*	*
23	Quintana Roo	4	Othón P. Blanco	1348	La Cristiandad (kilómetro Ochenta y Cuatro)	885237	175514	70	4	*	*	*	*	*	*	*	*	*	*	*	*	*	*	*	*	*	*	*	*	*	*	*	*	*	*	*	*	*	*	*	*	*	*	*	*	*	*	*	*
23	Quintana Roo	4	Othón P. Blanco	1351	Los Cuatro Vientos del Niño de Atocha	882411	183335	10	1	*	*	*	*	*	*	*	*	*	*	*	*	*	*	*	*	*	*	*	*	*	*	*	*	*	*	*	*	*	*	*	*	*	*	*	*	*	*	*	*
23	Quintana Roo	4	Othón P. Blanco	1357	Don Caldo	881622	183342	10	3	*	*	*	*	*	*	*	*	*	*	*	*	*	*	*	*	*	*	*	*	*	*	*	*	*	*	*	*	*	*	*	*	*	*	*	*	*	*	*	*
23	Quintana Roo	4	Othón P. Blanco	1359	El Dorado	881748	183920	10	5	*	*	*	*	*	*	*	*	*	*	*	*	*	*	*	*	*	*	*	*	*	*	*	*	*	*	*	*	*	*	*	*	*	*	*	*	*	*	*	*
23	Quintana Roo	4	Othón P. Blanco	1384	Javier Esparza	884006	181653	40	1	*	*	*	*	*	*	*	*	*	*	*	*	*	*	*	*	*	*	*	*	*	*	*	*	*	*	*	*	*	*	*	*	*	*	*	*	*	*	*	*
23	Quintana Roo	4	Othón P. Blanco	1385	El Espejo	882801	183231	15	6	*	*	*	*	*	*	*	*	*	*	*	*	*	*	*	*	*	*	*	*	*	*	*	*	*	*	*	*	*	*	*	*	*	*	*	*	*	*	*	*
23	Quintana Roo	4	Othón P. Blanco	1386	Las Ilusiones	890347	190031	60	12	6	6	1	1	0	2	2	0	0	11	5	6	1	1	1	0	0	10	10	4	6	4	5	9	3	6	8	4	4	1	1	0	1	1	0	100	3.5	11	0	0
23	Quintana Roo	4	Othón P. Blanco	1390	Veintidós de Octubre	885817	183257	140	2	*	*	*	*	*	*	*	*	*	*	*	*	*	*	*	*	*	*	*	*	*	*	*	*	*	*	*	*	*	*	*	*	*	*	*	*	*	*	*	*
23	Quintana Roo	4	Othón P. Blanco	1391	San José	882805	183229	15	5	*	*	*	*	*	*	*	*	*	*	*	*	*	*	*	*	*	*	*	*	*	*	*	*	*	*	*	*	*	*	*	*	*	*	*	*	*	*	*	*
23	Quintana Roo	4	Othón P. Blanco	1393	El Redomón	882105	183121	10	1	*	*	*	*	*	*	*	*	*	*	*	*	*	*	*	*	*	*	*	*	*	*	*	*	*	*	*	*	*	*	*	*	*	*	*	*	*	*	*	*
23	Quintana Roo	4	Othón P. Blanco	1401	El Crucero	883905	181451	50	2	*	*	*	*	*	*	*	*	*	*	*	*	*	*	*	*	*	*	*	*	*	*	*	*	*	*	*	*	*	*	*	*	*	*	*	*	*	*	*	*
23	Quintana Roo	4	Othón P. Blanco	1407	San Cipriano	881539	183632	10	5	*	*	*	*	*	*	*	*	*	*	*	*	*	*	*	*	*	*	*	*	*	*	*	*	*	*	*	*	*	*	*	*	*	*	*	*	*	*	*	*
23	Quintana Roo	4	Othón P. Blanco	1411	El Imán	885717	183552	140	2	*	*	*	*	*	*	*	*	*	*	*	*	*	*	*	*	*	*	*	*	*	*	*	*	*	*	*	*	*	*	*	*	*	*	*	*	*	*	*	*
23	Quintana Roo	4	Othón P. Blanco	1413	Gamboa	882256	184251	20	1	*	*	*	*	*	*	*	*	*	*	*	*	*	*	*	*	*	*	*	*	*	*	*	*	*	*	*	*	*	*	*	*	*	*	*	*	*	*	*	*
23	Quintana Roo	4	Othón P. Blanco	1419	El Gavilán	882410	183228	10	1	*	*	*	*	*	*	*	*	*	*	*	*	*	*	*	*	*	*	*	*	*	*	*	*	*	*	*	*	*	*	*	*	*	*	*	*	*	*	*	*
23	Quintana Roo	4	Othón P. Blanco	1421	Los Gavilanes	882224	183007	10	3	*	*	*	*	*	*	*	*	*	*	*	*	*	*	*	*	*	*	*	*	*	*	*	*	*	*	*	*	*	*	*	*	*	*	*	*	*	*	*	*
23	Quintana Roo	4	Othón P. Blanco	1423	Genaro Ramírez	885200	175910	70	2	*	*	*	*	*	*	*	*	*	*	*	*	*	*	*	*	*	*	*	*	*	*	*	*	*	*	*	*	*	*	*	*	*	*	*	*	*	*	*	*
23	Quintana Roo	4	Othón P. Blanco	1426	Graciano Balam Dzul	890110	182416	100	1	*	*	*	*	*	*	*	*	*	*	*	*	*	*	*	*	*	*	*	*	*	*	*	*	*	*	*	*	*	*	*	*	*	*	*	*	*	*	*	*
23	Quintana Roo	4	Othón P. Blanco	1439	El Naranjal	880741	190148	25	4	*	*	*	*	*	*	*	*	*	*	*	*	*	*	*	*	*	*	*	*	*	*	*	*	*	*	*	*	*	*	*	*	*	*	*	*	*	*	*	*
23	Quintana Roo	4	Othón P. Blanco	1453	Punta Gavilán	874803	182124	5	9	*	*	*	*	*	*	*	*	*	*	*	*	*	*	*	*	*	*	*	*	*	*	*	*	*	*	*	*	*	*	*	*	*	*	*	*	*	*	*	*
23	Quintana Roo	4	Othón P. Blanco	1455	Los Tigres del Mar	874404	183620	10	4	*	*	*	*	*	*	*	*	*	*	*	*	*	*	*	*	*	*	*	*	*	*	*	*	*	*	*	*	*	*	*	*	*	*	*	*	*	*	*	*
23	Quintana Roo	4	Othón P. Blanco	1458	Localidad sin Nombre	874337	183912	5	4	*	*	*	*	*	*	*	*	*	*	*	*	*	*	*	*	*	*	*	*	*	*	*	*	*	*	*	*	*	*	*	*	*	*	*	*	*	*	*	*
23	Quintana Roo	4	Othón P. Blanco	1460	San Francisco ( Javier Pérez Quintal )	874331	184008	5	4	*	*	*	*	*	*	*	*	*	*	*	*	*	*	*	*	*	*	*	*	*	*	*	*	*	*	*	*	*	*	*	*	*	*	*	*	*	*	*	*
23	Quintana Roo	4	Othón P. Blanco	1470	Los Laureles	884519	184603	100	1	*	*	*	*	*	*	*	*	*	*	*	*	*	*	*	*	*	*	*	*	*	*	*	*	*	*	*	*	*	*	*	*	*	*	*	*	*	*	*	*
23	Quintana Roo	4	Othón P. Blanco	1481	Localidad sin Nombre	882324	184604	20	4	*	*	*	*	*	*	*	*	*	*	*	*	*	*	*	*	*	*	*	*	*	*	*	*	*	*	*	*	*	*	*	*	*	*	*	*	*	*	*	*
23	Quintana Roo	4	Othón P. Blanco	1484	The Five Sisters	881321	183657	10	5	*	*	*	*	*	*	*	*	*	*	*	*	*	*	*	*	*	*	*	*	*	*	*	*	*	*	*	*	*	*	*	*	*	*	*	*	*	*	*	*
23	Quintana Roo	4	Othón P. Blanco	1486	Las Flores de Guadalupe	881534	183506	10	2	*	*	*	*	*	*	*	*	*	*	*	*	*	*	*	*	*	*	*	*	*	*	*	*	*	*	*	*	*	*	*	*	*	*	*	*	*	*	*	*
23	Quintana Roo	4	Othón P. Blanco	1493	Las Carmelitas	882349	183103	10	8	3	5	2	0	2	3	1	2	1	6	3	3	0	0	0	0	0	5	5	2	3	2	2	5	2	3	5	2	3	0	0	0	0	0	0	60	2.33	6	0	0
23	Quintana Roo	4	Othón P. Blanco	1495	Luis Kantún Chí	882353	183246	10	2	*	*	*	*	*	*	*	*	*	*	*	*	*	*	*	*	*	*	*	*	*	*	*	*	*	*	*	*	*	*	*	*	*	*	*	*	*	*	*	*
23	Quintana Roo	4	Othón P. Blanco	1499	Víctor Peraza	882313	183429	10	1	*	*	*	*	*	*	*	*	*	*	*	*	*	*	*	*	*	*	*	*	*	*	*	*	*	*	*	*	*	*	*	*	*	*	*	*	*	*	*	*
23	Quintana Roo	4	Othón P. Blanco	1509	San José	881654	183404	10	8	*	*	*	*	*	*	*	*	*	*	*	*	*	*	*	*	*	*	*	*	*	*	*	*	*	*	*	*	*	*	*	*	*	*	*	*	*	*	*	*
23	Quintana Roo	4	Othón P. Blanco	1520	San Juan	881611	183800	10	1	*	*	*	*	*	*	*	*	*	*	*	*	*	*	*	*	*	*	*	*	*	*	*	*	*	*	*	*	*	*	*	*	*	*	*	*	*	*	*	*
23	Quintana Roo	4	Othón P. Blanco	1521	El Jarocho	881907	184147	10	4	*	*	*	*	*	*	*	*	*	*	*	*	*	*	*	*	*	*	*	*	*	*	*	*	*	*	*	*	*	*	*	*	*	*	*	*	*	*	*	*
23	Quintana Roo	4	Othón P. Blanco	1525	La Fogata	884226	181023	80	5	*	*	*	*	*	*	*	*	*	*	*	*	*	*	*	*	*	*	*	*	*	*	*	*	*	*	*	*	*	*	*	*	*	*	*	*	*	*	*	*
23	Quintana Roo	4	Othón P. Blanco	1527	Jesús Ceja López	882808	183502	15	3	*	*	*	*	*	*	*	*	*	*	*	*	*	*	*	*	*	*	*	*	*	*	*	*	*	*	*	*	*	*	*	*	*	*	*	*	*	*	*	*
23	Quintana Roo	4	Othón P. Blanco	1528	El Milagro	882759	184616	20	1	*	*	*	*	*	*	*	*	*	*	*	*	*	*	*	*	*	*	*	*	*	*	*	*	*	*	*	*	*	*	*	*	*	*	*	*	*	*	*	*
23	Quintana Roo	4	Othón P. Blanco	1538	Chinchorro Enterprice	874336	183916	5	1	*	*	*	*	*	*	*	*	*	*	*	*	*	*	*	*	*	*	*	*	*	*	*	*	*	*	*	*	*	*	*	*	*	*	*	*	*	*	*	*
23	Quintana Roo	4	Othón P. Blanco	1557	Zak-Chakán	880856	185721	20	2	*	*	*	*	*	*	*	*	*	*	*	*	*	*	*	*	*	*	*	*	*	*	*	*	*	*	*	*	*	*	*	*	*	*	*	*	*	*	*	*
23	Quintana Roo	4	Othón P. Blanco	1561	La Laguna	890535	182707	30	3	*	*	*	*	*	*	*	*	*	*	*	*	*	*	*	*	*	*	*	*	*	*	*	*	*	*	*	*	*	*	*	*	*	*	*	*	*	*	*	*
23	Quintana Roo	4	Othón P. Blanco	1562	El Laurel	881457	183732	10	4	*	*	*	*	*	*	*	*	*	*	*	*	*	*	*	*	*	*	*	*	*	*	*	*	*	*	*	*	*	*	*	*	*	*	*	*	*	*	*	*
23	Quintana Roo	4	Othón P. Blanco	1564	Lázaro Cárdenas	881528	183354	10	264	143	121	23	13	10	109	64	45	5	241	130	111	52	81	49	32	29	184	155	79	76	39	63	144	72	72	139	68	71	11	7	4	7	6	1	118.18	2.98	226	15	7
23	Quintana Roo	4	Othón P. Blanco	1581	La Noria	883232	183011	15	2	*	*	*	*	*	*	*	*	*	*	*	*	*	*	*	*	*	*	*	*	*	*	*	*	*	*	*	*	*	*	*	*	*	*	*	*	*	*	*	*
23	Quintana Roo	4	Othón P. Blanco	1595	La Rosita	882702	183348	15	2	*	*	*	*	*	*	*	*	*	*	*	*	*	*	*	*	*	*	*	*	*	*	*	*	*	*	*	*	*	*	*	*	*	*	*	*	*	*	*	*
23	Quintana Roo	4	Othón P. Blanco	1602	Miguel López Domínguez	884705	183520	20	2	*	*	*	*	*	*	*	*	*	*	*	*	*	*	*	*	*	*	*	*	*	*	*	*	*	*	*	*	*	*	*	*	*	*	*	*	*	*	*	*
23	Quintana Roo	4	Othón P. Blanco	1607	Monasterio de Nuestra Señora de Guadalupe	882103	183027	10	33	*	*	*	*	*	*	*	*	*	*	*	*	*	*	*	*	*	*	*	*	*	*	*	*	*	*	*	*	*	*	*	*	*	*	*	*	*	*	*	*
23	Quintana Roo	4	Othón P. Blanco	1612	La Nueva Esperanza	880652	190716	40	1	*	*	*	*	*	*	*	*	*	*	*	*	*	*	*	*	*	*	*	*	*	*	*	*	*	*	*	*	*	*	*	*	*	*	*	*	*	*	*	*
23	Quintana Roo	4	Othón P. Blanco	1614	Nueva Vida	881606	183251	10	13	*	*	*	*	*	*	*	*	*	*	*	*	*	*	*	*	*	*	*	*	*	*	*	*	*	*	*	*	*	*	*	*	*	*	*	*	*	*	*	*
23	Quintana Roo	4	Othón P. Blanco	1619	Pablo Loza Flores	882350	183314	10	1	*	*	*	*	*	*	*	*	*	*	*	*	*	*	*	*	*	*	*	*	*	*	*	*	*	*	*	*	*	*	*	*	*	*	*	*	*	*	*	*
23	Quintana Roo	4	Othón P. Blanco	1628	Papalipa	884857	185824	60	1	*	*	*	*	*	*	*	*	*	*	*	*	*	*	*	*	*	*	*	*	*	*	*	*	*	*	*	*	*	*	*	*	*	*	*	*	*	*	*	*
23	Quintana Roo	4	Othón P. Blanco	1633	Paraíso Segundo	882635	184353	15	1	*	*	*	*	*	*	*	*	*	*	*	*	*	*	*	*	*	*	*	*	*	*	*	*	*	*	*	*	*	*	*	*	*	*	*	*	*	*	*	*
23	Quintana Roo	4	Othón P. Blanco	1636	San José	882057	183152	10	4	*	*	*	*	*	*	*	*	*	*	*	*	*	*	*	*	*	*	*	*	*	*	*	*	*	*	*	*	*	*	*	*	*	*	*	*	*	*	*	*
23	Quintana Roo	4	Othón P. Blanco	1640	La Pasadita	881401	185337	20	1	*	*	*	*	*	*	*	*	*	*	*	*	*	*	*	*	*	*	*	*	*	*	*	*	*	*	*	*	*	*	*	*	*	*	*	*	*	*	*	*
23	Quintana Roo	4	Othón P. Blanco	1641	La Pasadita	890544	182809	150	6	*	*	*	*	*	*	*	*	*	*	*	*	*	*	*	*	*	*	*	*	*	*	*	*	*	*	*	*	*	*	*	*	*	*	*	*	*	*	*	*
23	Quintana Roo	4	Othón P. Blanco	1648	Pedro Ávila	882019	184428	15	7	*	*	*	*	*	*	*	*	*	*	*	*	*	*	*	*	*	*	*	*	*	*	*	*	*	*	*	*	*	*	*	*	*	*	*	*	*	*	*	*
23	Quintana Roo	4	Othón P. Blanco	1655	Pino Suárez	882435	183224	10	6	*	*	*	*	*	*	*	*	*	*	*	*	*	*	*	*	*	*	*	*	*	*	*	*	*	*	*	*	*	*	*	*	*	*	*	*	*	*	*	*
23	Quintana Roo	4	Othón P. Blanco	1669	El Progreso	883736	182926	20	7	*	*	*	*	*	*	*	*	*	*	*	*	*	*	*	*	*	*	*	*	*	*	*	*	*	*	*	*	*	*	*	*	*	*	*	*	*	*	*	*
23	Quintana Roo	4	Othón P. Blanco	1673	Punta Estrella	881551	183330	5	7	*	*	*	*	*	*	*	*	*	*	*	*	*	*	*	*	*	*	*	*	*	*	*	*	*	*	*	*	*	*	*	*	*	*	*	*	*	*	*	*
23	Quintana Roo	4	Othón P. Blanco	1674	Punta Pulticub	873351	190400	5	2	*	*	*	*	*	*	*	*	*	*	*	*	*	*	*	*	*	*	*	*	*	*	*	*	*	*	*	*	*	*	*	*	*	*	*	*	*	*	*	*
23	Quintana Roo	4	Othón P. Blanco	1675	Punta Tam	874256	184139	5	4	*	*	*	*	*	*	*	*	*	*	*	*	*	*	*	*	*	*	*	*	*	*	*	*	*	*	*	*	*	*	*	*	*	*	*	*	*	*	*	*
23	Quintana Roo	4	Othón P. Blanco	1679	Hermanos Sánchez	883543	182846	30	4	*	*	*	*	*	*	*	*	*	*	*	*	*	*	*	*	*	*	*	*	*	*	*	*	*	*	*	*	*	*	*	*	*	*	*	*	*	*	*	*
23	Quintana Roo	4	Othón P. Blanco	1680	La Esperanza	882333	183409	10	7	*	*	*	*	*	*	*	*	*	*	*	*	*	*	*	*	*	*	*	*	*	*	*	*	*	*	*	*	*	*	*	*	*	*	*	*	*	*	*	*
23	Quintana Roo	4	Othón P. Blanco	1686	Rancho Alegre	882342	183628	10	1	*	*	*	*	*	*	*	*	*	*	*	*	*	*	*	*	*	*	*	*	*	*	*	*	*	*	*	*	*	*	*	*	*	*	*	*	*	*	*	*
23	Quintana Roo	4	Othón P. Blanco	1689	Kai Luum Cito	873940	184948	5	9	*	*	*	*	*	*	*	*	*	*	*	*	*	*	*	*	*	*	*	*	*	*	*	*	*	*	*	*	*	*	*	*	*	*	*	*	*	*	*	*
23	Quintana Roo	4	Othón P. Blanco	1691	Rancho Escondido	890744	184713	100	3	*	*	*	*	*	*	*	*	*	*	*	*	*	*	*	*	*	*	*	*	*	*	*	*	*	*	*	*	*	*	*	*	*	*	*	*	*	*	*	*
23	Quintana Roo	4	Othón P. Blanco	1692	Rancho Gabriela	874338	183909	5	9	*	*	*	*	*	*	*	*	*	*	*	*	*	*	*	*	*	*	*	*	*	*	*	*	*	*	*	*	*	*	*	*	*	*	*	*	*	*	*	*
23	Quintana Roo	4	Othón P. Blanco	1696	Rancho Portillas	875032	181340	5	1	*	*	*	*	*	*	*	*	*	*	*	*	*	*	*	*	*	*	*	*	*	*	*	*	*	*	*	*	*	*	*	*	*	*	*	*	*	*	*	*
23	Quintana Roo	4	Othón P. Blanco	1701	Los Reyes	883755	183143	40	5	*	*	*	*	*	*	*	*	*	*	*	*	*	*	*	*	*	*	*	*	*	*	*	*	*	*	*	*	*	*	*	*	*	*	*	*	*	*	*	*
23	Quintana Roo	4	Othón P. Blanco	1706	El Roble	882520	190047	30	5	*	*	*	*	*	*	*	*	*	*	*	*	*	*	*	*	*	*	*	*	*	*	*	*	*	*	*	*	*	*	*	*	*	*	*	*	*	*	*	*
23	Quintana Roo	4	Othón P. Blanco	1707	El Roble	890601	182700	140	1	*	*	*	*	*	*	*	*	*	*	*	*	*	*	*	*	*	*	*	*	*	*	*	*	*	*	*	*	*	*	*	*	*	*	*	*	*	*	*	*
23	Quintana Roo	4	Othón P. Blanco	1712	Santa Rosa (La Aguada)	875127	181620	5	1	*	*	*	*	*	*	*	*	*	*	*	*	*	*	*	*	*	*	*	*	*	*	*	*	*	*	*	*	*	*	*	*	*	*	*	*	*	*	*	*
23	Quintana Roo	4	Othón P. Blanco	1716	El Sagrario	885918	182726	130	1	*	*	*	*	*	*	*	*	*	*	*	*	*	*	*	*	*	*	*	*	*	*	*	*	*	*	*	*	*	*	*	*	*	*	*	*	*	*	*	*
23	Quintana Roo	4	Othón P. Blanco	1718	San Andrés de los Xooles	881735	183507	10	2	*	*	*	*	*	*	*	*	*	*	*	*	*	*	*	*	*	*	*	*	*	*	*	*	*	*	*	*	*	*	*	*	*	*	*	*	*	*	*	*
23	Quintana Roo	4	Othón P. Blanco	1719	San Antonio	873909	185055	5	1	*	*	*	*	*	*	*	*	*	*	*	*	*	*	*	*	*	*	*	*	*	*	*	*	*	*	*	*	*	*	*	*	*	*	*	*	*	*	*	*
23	Quintana Roo	4	Othón P. Blanco	1721	San Antonio	883002	184601	30	2	*	*	*	*	*	*	*	*	*	*	*	*	*	*	*	*	*	*	*	*	*	*	*	*	*	*	*	*	*	*	*	*	*	*	*	*	*	*	*	*
23	Quintana Roo	4	Othón P. Blanco	1725	San Carlos	881647	183759	10	1	*	*	*	*	*	*	*	*	*	*	*	*	*	*	*	*	*	*	*	*	*	*	*	*	*	*	*	*	*	*	*	*	*	*	*	*	*	*	*	*
23	Quintana Roo	4	Othón P. Blanco	1726	San Colombino	881425	183438	5	2	*	*	*	*	*	*	*	*	*	*	*	*	*	*	*	*	*	*	*	*	*	*	*	*	*	*	*	*	*	*	*	*	*	*	*	*	*	*	*	*
23	Quintana Roo	4	Othón P. Blanco	1727	San Cristobal	881545	183342	10	7	*	*	*	*	*	*	*	*	*	*	*	*	*	*	*	*	*	*	*	*	*	*	*	*	*	*	*	*	*	*	*	*	*	*	*	*	*	*	*	*
23	Quintana Roo	4	Othón P. Blanco	1729	San Cristobal Dos	881539	183348	10	14	7	7	1	0	1	3	2	1	0	13	7	6	1	2	2	0	1	12	11	5	6	3	4	9	5	4	11	5	6	2	0	2	1	0	1	100	2.6	13	0	0
23	Quintana Roo	4	Othón P. Blanco	1730	San Fernando	881632	183810	10	1	*	*	*	*	*	*	*	*	*	*	*	*	*	*	*	*	*	*	*	*	*	*	*	*	*	*	*	*	*	*	*	*	*	*	*	*	*	*	*	*
23	Quintana Roo	4	Othón P. Blanco	1738	San Jerónimo	874243	184520	5	4	*	*	*	*	*	*	*	*	*	*	*	*	*	*	*	*	*	*	*	*	*	*	*	*	*	*	*	*	*	*	*	*	*	*	*	*	*	*	*	*
23	Quintana Roo	4	Othón P. Blanco	1745	San Martín	881539	183431	10	6	*	*	*	*	*	*	*	*	*	*	*	*	*	*	*	*	*	*	*	*	*	*	*	*	*	*	*	*	*	*	*	*	*	*	*	*	*	*	*	*
23	Quintana Roo	4	Othón P. Blanco	1750	San Pedro	882458	183122	10	5	*	*	*	*	*	*	*	*	*	*	*	*	*	*	*	*	*	*	*	*	*	*	*	*	*	*	*	*	*	*	*	*	*	*	*	*	*	*	*	*
23	Quintana Roo	4	Othón P. Blanco	1751	Sandwood Villas	874836	182038	5	2	*	*	*	*	*	*	*	*	*	*	*	*	*	*	*	*	*	*	*	*	*	*	*	*	*	*	*	*	*	*	*	*	*	*	*	*	*	*	*	*
23	Quintana Roo	4	Othón P. Blanco	1757	Santa Lucía	881547	183756	10	8	*	*	*	*	*	*	*	*	*	*	*	*	*	*	*	*	*	*	*	*	*	*	*	*	*	*	*	*	*	*	*	*	*	*	*	*	*	*	*	*
23	Quintana Roo	4	Othón P. Blanco	1768	El Socio	882405	183122	10	6	*	*	*	*	*	*	*	*	*	*	*	*	*	*	*	*	*	*	*	*	*	*	*	*	*	*	*	*	*	*	*	*	*	*	*	*	*	*	*	*
23	Quintana Roo	4	Othón P. Blanco	1779	Los Tres Reyes	882631	184249	25	4	*	*	*	*	*	*	*	*	*	*	*	*	*	*	*	*	*	*	*	*	*	*	*	*	*	*	*	*	*	*	*	*	*	*	*	*	*	*	*	*
23	Quintana Roo	4	Othón P. Blanco	1795	Wesby	881646	183808	10	3	*	*	*	*	*	*	*	*	*	*	*	*	*	*	*	*	*	*	*	*	*	*	*	*	*	*	*	*	*	*	*	*	*	*	*	*	*	*	*	*
23	Quintana Roo	4	Othón P. Blanco	1797	El Frutalito	882423	183937	15	2	*	*	*	*	*	*	*	*	*	*	*	*	*	*	*	*	*	*	*	*	*	*	*	*	*	*	*	*	*	*	*	*	*	*	*	*	*	*	*	*
23	Quintana Roo	4	Othón P. Blanco	1802	El Chechén	884012	181556	50	4	*	*	*	*	*	*	*	*	*	*	*	*	*	*	*	*	*	*	*	*	*	*	*	*	*	*	*	*	*	*	*	*	*	*	*	*	*	*	*	*
23	Quintana Roo	4	Othón P. Blanco	1805	Emiliano Pantín Góngora	882312	184200	15	2	*	*	*	*	*	*	*	*	*	*	*	*	*	*	*	*	*	*	*	*	*	*	*	*	*	*	*	*	*	*	*	*	*	*	*	*	*	*	*	*
23	Quintana Roo	4	Othón P. Blanco	1807	La Esperanza	881824	183213	10	6	*	*	*	*	*	*	*	*	*	*	*	*	*	*	*	*	*	*	*	*	*	*	*	*	*	*	*	*	*	*	*	*	*	*	*	*	*	*	*	*
23	Quintana Roo	4	Othón P. Blanco	1826	Rancho Villa	884007	181557	50	8	*	*	*	*	*	*	*	*	*	*	*	*	*	*	*	*	*	*	*	*	*	*	*	*	*	*	*	*	*	*	*	*	*	*	*	*	*	*	*	*
23	Quintana Roo	4	Othón P. Blanco	1828	Santa Gerónima	881827	183205	10	3	*	*	*	*	*	*	*	*	*	*	*	*	*	*	*	*	*	*	*	*	*	*	*	*	*	*	*	*	*	*	*	*	*	*	*	*	*	*	*	*
23	Quintana Roo	4	Othón P. Blanco	1836	Altamira	890456	184413	140	2	*	*	*	*	*	*	*	*	*	*	*	*	*	*	*	*	*	*	*	*	*	*	*	*	*	*	*	*	*	*	*	*	*	*	*	*	*	*	*	*
23	Quintana Roo	4	Othón P. Blanco	1841	Santa Rosa	890346	190328	60	4	*	*	*	*	*	*	*	*	*	*	*	*	*	*	*	*	*	*	*	*	*	*	*	*	*	*	*	*	*	*	*	*	*	*	*	*	*	*	*	*
23	Quintana Roo	4	Othón P. Blanco	1849	Colonia Colosio	882346	184145	15	31	20	11	4	1	3	13	9	4	0	27	19	8	6	9	8	1	3	21	18	11	7	9	6	18	11	7	14	8	6	0	0	0	0	0	0	181.82	2.43	27	0	0
23	Quintana Roo	4	Othón P. Blanco	1853	María Bonita	882408	183322	10	1	*	*	*	*	*	*	*	*	*	*	*	*	*	*	*	*	*	*	*	*	*	*	*	*	*	*	*	*	*	*	*	*	*	*	*	*	*	*	*	*
23	Quintana Roo	4	Othón P. Blanco	1855	San Carlos	884033	181626	50	3	*	*	*	*	*	*	*	*	*	*	*	*	*	*	*	*	*	*	*	*	*	*	*	*	*	*	*	*	*	*	*	*	*	*	*	*	*	*	*	*
23	Quintana Roo	4	Othón P. Blanco	1859	Melchor	881501	184817	10	3	*	*	*	*	*	*	*	*	*	*	*	*	*	*	*	*	*	*	*	*	*	*	*	*	*	*	*	*	*	*	*	*	*	*	*	*	*	*	*	*
23	Quintana Roo	4	Othón P. Blanco	1869	Javier Palacios	882311	184206	15	2	*	*	*	*	*	*	*	*	*	*	*	*	*	*	*	*	*	*	*	*	*	*	*	*	*	*	*	*	*	*	*	*	*	*	*	*	*	*	*	*
23	Quintana Roo	4	Othón P. Blanco	1872	Juan Canul Pech	882320	183355	10	1	*	*	*	*	*	*	*	*	*	*	*	*	*	*	*	*	*	*	*	*	*	*	*	*	*	*	*	*	*	*	*	*	*	*	*	*	*	*	*	*
23	Quintana Roo	4	Othón P. Blanco	1883	Monte Calvario	875209	185444	10	2	*	*	*	*	*	*	*	*	*	*	*	*	*	*	*	*	*	*	*	*	*	*	*	*	*	*	*	*	*	*	*	*	*	*	*	*	*	*	*	*
23	Quintana Roo	4	Othón P. Blanco	1888	El Pedregal	880753	190152	25	14	*	*	*	*	*	*	*	*	*	*	*	*	*	*	*	*	*	*	*	*	*	*	*	*	*	*	*	*	*	*	*	*	*	*	*	*	*	*	*	*
23	Quintana Roo	4	Othón P. Blanco	1891	La Esperanza	874835	185056	10	2	*	*	*	*	*	*	*	*	*	*	*	*	*	*	*	*	*	*	*	*	*	*	*	*	*	*	*	*	*	*	*	*	*	*	*	*	*	*	*	*
23	Quintana Roo	4	Othón P. Blanco	1892	Rancho Escondido	874025	184845	10	1	*	*	*	*	*	*	*	*	*	*	*	*	*	*	*	*	*	*	*	*	*	*	*	*	*	*	*	*	*	*	*	*	*	*	*	*	*	*	*	*
23	Quintana Roo	4	Othón P. Blanco	1895	Manuel Vega Herrera	882800	183226	10	11	*	*	*	*	*	*	*	*	*	*	*	*	*	*	*	*	*	*	*	*	*	*	*	*	*	*	*	*	*	*	*	*	*	*	*	*	*	*	*	*
23	Quintana Roo	4	Othón P. Blanco	1906	Unión de Guadalupe	884035	181637	70	8	*	*	*	*	*	*	*	*	*	*	*	*	*	*	*	*	*	*	*	*	*	*	*	*	*	*	*	*	*	*	*	*	*	*	*	*	*	*	*	*
23	Quintana Roo	4	Othón P. Blanco	1920	Albino Villagómez	882038	183122	10	1	*	*	*	*	*	*	*	*	*	*	*	*	*	*	*	*	*	*	*	*	*	*	*	*	*	*	*	*	*	*	*	*	*	*	*	*	*	*	*	*
23	Quintana Roo	4	Othón P. Blanco	1931	Los Martínez	881551	183732	10	4	*	*	*	*	*	*	*	*	*	*	*	*	*	*	*	*	*	*	*	*	*	*	*	*	*	*	*	*	*	*	*	*	*	*	*	*	*	*	*	*
23	Quintana Roo	4	Othón P. Blanco	1932	Carlos Delgado	883357	184829	20	1	*	*	*	*	*	*	*	*	*	*	*	*	*	*	*	*	*	*	*	*	*	*	*	*	*	*	*	*	*	*	*	*	*	*	*	*	*	*	*	*
23	Quintana Roo	4	Othón P. Blanco	1938	Los Ceibos	881506	183734	10	4	*	*	*	*	*	*	*	*	*	*	*	*	*	*	*	*	*	*	*	*	*	*	*	*	*	*	*	*	*	*	*	*	*	*	*	*	*	*	*	*
23	Quintana Roo	4	Othón P. Blanco	1939	El Cerrito	884018	181603	50	1	*	*	*	*	*	*	*	*	*	*	*	*	*	*	*	*	*	*	*	*	*	*	*	*	*	*	*	*	*	*	*	*	*	*	*	*	*	*	*	*
23	Quintana Roo	4	Othón P. Blanco	1942	El Ciruelo	882249	183033	10	4	*	*	*	*	*	*	*	*	*	*	*	*	*	*	*	*	*	*	*	*	*	*	*	*	*	*	*	*	*	*	*	*	*	*	*	*	*	*	*	*
23	Quintana Roo	4	Othón P. Blanco	1945	Constancio Collí	881622	183801	10	2	*	*	*	*	*	*	*	*	*	*	*	*	*	*	*	*	*	*	*	*	*	*	*	*	*	*	*	*	*	*	*	*	*	*	*	*	*	*	*	*
23	Quintana Roo	4	Othón P. Blanco	1948	El Coyol	883945	182852	10	3	*	*	*	*	*	*	*	*	*	*	*	*	*	*	*	*	*	*	*	*	*	*	*	*	*	*	*	*	*	*	*	*	*	*	*	*	*	*	*	*
23	Quintana Roo	4	Othón P. Blanco	1951	David Cámara	882922	183358	20	4	*	*	*	*	*	*	*	*	*	*	*	*	*	*	*	*	*	*	*	*	*	*	*	*	*	*	*	*	*	*	*	*	*	*	*	*	*	*	*	*
23	Quintana Roo	4	Othón P. Blanco	1953	Deshuesadero el Barón	882140	183049	10	1	*	*	*	*	*	*	*	*	*	*	*	*	*	*	*	*	*	*	*	*	*	*	*	*	*	*	*	*	*	*	*	*	*	*	*	*	*	*	*	*
23	Quintana Roo	4	Othón P. Blanco	1957	Pedro Pescador	881644	183809	10	4	*	*	*	*	*	*	*	*	*	*	*	*	*	*	*	*	*	*	*	*	*	*	*	*	*	*	*	*	*	*	*	*	*	*	*	*	*	*	*	*
23	Quintana Roo	4	Othón P. Blanco	1965	Estado Treinta	882806	183642	20	1	*	*	*	*	*	*	*	*	*	*	*	*	*	*	*	*	*	*	*	*	*	*	*	*	*	*	*	*	*	*	*	*	*	*	*	*	*	*	*	*
23	Quintana Roo	4	Othón P. Blanco	1974	Guadalupe Sánchez	884717	181001	80	1	*	*	*	*	*	*	*	*	*	*	*	*	*	*	*	*	*	*	*	*	*	*	*	*	*	*	*	*	*	*	*	*	*	*	*	*	*	*	*	*
23	Quintana Roo	4	Othón P. Blanco	1991	San Miguel	881551	183645	10	1	*	*	*	*	*	*	*	*	*	*	*	*	*	*	*	*	*	*	*	*	*	*	*	*	*	*	*	*	*	*	*	*	*	*	*	*	*	*	*	*
23	Quintana Roo	4	Othón P. Blanco	2012	Jeremías Osorio Montalvo	881547	183211	5	1	*	*	*	*	*	*	*	*	*	*	*	*	*	*	*	*	*	*	*	*	*	*	*	*	*	*	*	*	*	*	*	*	*	*	*	*	*	*	*	*
23	Quintana Roo	4	Othón P. Blanco	2015	José González	882927	183448	20	9	*	*	*	*	*	*	*	*	*	*	*	*	*	*	*	*	*	*	*	*	*	*	*	*	*	*	*	*	*	*	*	*	*	*	*	*	*	*	*	*
23	Quintana Roo	4	Othón P. Blanco	2017	José Jesús Aguilar Ovando	881736	184017	10	11	*	*	*	*	*	*	*	*	*	*	*	*	*	*	*	*	*	*	*	*	*	*	*	*	*	*	*	*	*	*	*	*	*	*	*	*	*	*	*	*
23	Quintana Roo	4	Othón P. Blanco	2018	José Rafael	882755	183340	20	5	*	*	*	*	*	*	*	*	*	*	*	*	*	*	*	*	*	*	*	*	*	*	*	*	*	*	*	*	*	*	*	*	*	*	*	*	*	*	*	*
23	Quintana Roo	4	Othón P. Blanco	2019	José Santana	883203	183727	20	9	*	*	*	*	*	*	*	*	*	*	*	*	*	*	*	*	*	*	*	*	*	*	*	*	*	*	*	*	*	*	*	*	*	*	*	*	*	*	*	*
23	Quintana Roo	4	Othón P. Blanco	2022	Julio Caballero	883117	183059	20	10	*	*	*	*	*	*	*	*	*	*	*	*	*	*	*	*	*	*	*	*	*	*	*	*	*	*	*	*	*	*	*	*	*	*	*	*	*	*	*	*
23	Quintana Roo	4	Othón P. Blanco	2024	Lagunita	882201	183048	10	8	*	*	*	*	*	*	*	*	*	*	*	*	*	*	*	*	*	*	*	*	*	*	*	*	*	*	*	*	*	*	*	*	*	*	*	*	*	*	*	*
23	Quintana Roo	4	Othón P. Blanco	2025	Laureles	883337	184755	20	2	*	*	*	*	*	*	*	*	*	*	*	*	*	*	*	*	*	*	*	*	*	*	*	*	*	*	*	*	*	*	*	*	*	*	*	*	*	*	*	*
23	Quintana Roo	4	Othón P. Blanco	2033	El Manantial	884215	181049	80	1	*	*	*	*	*	*	*	*	*	*	*	*	*	*	*	*	*	*	*	*	*	*	*	*	*	*	*	*	*	*	*	*	*	*	*	*	*	*	*	*
23	Quintana Roo	4	Othón P. Blanco	2039	María Luisa Durán	881651	183754	10	3	*	*	*	*	*	*	*	*	*	*	*	*	*	*	*	*	*	*	*	*	*	*	*	*	*	*	*	*	*	*	*	*	*	*	*	*	*	*	*	*
23	Quintana Roo	4	Othón P. Blanco	2049	Mil Millas al Sur	883001	185655	40	4	*	*	*	*	*	*	*	*	*	*	*	*	*	*	*	*	*	*	*	*	*	*	*	*	*	*	*	*	*	*	*	*	*	*	*	*	*	*	*	*
23	Quintana Roo	4	Othón P. Blanco	2051	La Roca	881347	183811	10	1	*	*	*	*	*	*	*	*	*	*	*	*	*	*	*	*	*	*	*	*	*	*	*	*	*	*	*	*	*	*	*	*	*	*	*	*	*	*	*	*
23	Quintana Roo	4	Othón P. Blanco	2055	Nuevos Horizontes	883615	184858	20	11	*	*	*	*	*	*	*	*	*	*	*	*	*	*	*	*	*	*	*	*	*	*	*	*	*	*	*	*	*	*	*	*	*	*	*	*	*	*	*	*
23	Quintana Roo	4	Othón P. Blanco	2057	Oxtankah	881354	183631	5	1	*	*	*	*	*	*	*	*	*	*	*	*	*	*	*	*	*	*	*	*	*	*	*	*	*	*	*	*	*	*	*	*	*	*	*	*	*	*	*	*
23	Quintana Roo	4	Othón P. Blanco	2058	El Palmar	882431	183121	10	3	*	*	*	*	*	*	*	*	*	*	*	*	*	*	*	*	*	*	*	*	*	*	*	*	*	*	*	*	*	*	*	*	*	*	*	*	*	*	*	*
23	Quintana Roo	4	Othón P. Blanco	2066	El Pedregal	881522	183558	10	1	*	*	*	*	*	*	*	*	*	*	*	*	*	*	*	*	*	*	*	*	*	*	*	*	*	*	*	*	*	*	*	*	*	*	*	*	*	*	*	*
23	Quintana Roo	4	Othón P. Blanco	2068	El Productor R	882751	183337	20	4	*	*	*	*	*	*	*	*	*	*	*	*	*	*	*	*	*	*	*	*	*	*	*	*	*	*	*	*	*	*	*	*	*	*	*	*	*	*	*	*
23	Quintana Roo	4	Othón P. Blanco	2070	Las Pulgas Módulo Dos	883026	183544	20	4	*	*	*	*	*	*	*	*	*	*	*	*	*	*	*	*	*	*	*	*	*	*	*	*	*	*	*	*	*	*	*	*	*	*	*	*	*	*	*	*
23	Quintana Roo	4	Othón P. Blanco	2075	Ramón Aguilar	882114	184019	10	4	*	*	*	*	*	*	*	*	*	*	*	*	*	*	*	*	*	*	*	*	*	*	*	*	*	*	*	*	*	*	*	*	*	*	*	*	*	*	*	*
23	Quintana Roo	4	Othón P. Blanco	2086	Rubén Gómez Magaña	882801	183509	20	4	*	*	*	*	*	*	*	*	*	*	*	*	*	*	*	*	*	*	*	*	*	*	*	*	*	*	*	*	*	*	*	*	*	*	*	*	*	*	*	*
23	Quintana Roo	4	Othón P. Blanco	2091	San Isidro Dos	882058	183104	10	12	*	*	*	*	*	*	*	*	*	*	*	*	*	*	*	*	*	*	*	*	*	*	*	*	*	*	*	*	*	*	*	*	*	*	*	*	*	*	*	*
23	Quintana Roo	4	Othón P. Blanco	2094	San Rafael	883911	182910	10	1	*	*	*	*	*	*	*	*	*	*	*	*	*	*	*	*	*	*	*	*	*	*	*	*	*	*	*	*	*	*	*	*	*	*	*	*	*	*	*	*
23	Quintana Roo	4	Othón P. Blanco	2105	Taller Mecánico Richi	882210	183051	10	1	*	*	*	*	*	*	*	*	*	*	*	*	*	*	*	*	*	*	*	*	*	*	*	*	*	*	*	*	*	*	*	*	*	*	*	*	*	*	*	*
23	Quintana Roo	4	Othón P. Blanco	2108	El Indio	882010	184929	20	2	*	*	*	*	*	*	*	*	*	*	*	*	*	*	*	*	*	*	*	*	*	*	*	*	*	*	*	*	*	*	*	*	*	*	*	*	*	*	*	*
23	Quintana Roo	4	Othón P. Blanco	2110	Unidad de Medicina Familiar Número Cinco	884022	181603	50	10	5	5	2	1	1	3	2	1	0	8	4	4	1	1	1	0	0	7	7	3	4	2	2	7	3	4	7	3	4	0	0	0	0	0	0	100	2.25	8	0	0
23	Quintana Roo	4	Othón P. Blanco	2111	Unidad Veintisiete	883928	181904	40	3	*	*	*	*	*	*	*	*	*	*	*	*	*	*	*	*	*	*	*	*	*	*	*	*	*	*	*	*	*	*	*	*	*	*	*	*	*	*	*	*
23	Quintana Roo	4	Othón P. Blanco	2117	La Especial	882216	183057	10	11	6	5	0	0	0	2	1	1	0	11	6	5	1	2	1	1	1	10	9	5	4	3	3	7	4	3	8	4	4	2	1	1	1	1	0	120	2	9	2	2
23	Quintana Roo	4	Othón P. Blanco	2125	Atenea	874333	183926	5	1	*	*	*	*	*	*	*	*	*	*	*	*	*	*	*	*	*	*	*	*	*	*	*	*	*	*	*	*	*	*	*	*	*	*	*	*	*	*	*	*
23	Quintana Roo	4	Othón P. Blanco	2131	Catalino Maza Aguilar (Pavo )	873647	185757	5	2	*	*	*	*	*	*	*	*	*	*	*	*	*	*	*	*	*	*	*	*	*	*	*	*	*	*	*	*	*	*	*	*	*	*	*	*	*	*	*	*
23	Quintana Roo	4	Othón P. Blanco	2134	Cuatro Hermanos	890443	185643	100	3	*	*	*	*	*	*	*	*	*	*	*	*	*	*	*	*	*	*	*	*	*	*	*	*	*	*	*	*	*	*	*	*	*	*	*	*	*	*	*	*
23	Quintana Roo	4	Othón P. Blanco	2139	Chula Vista	880703	185735	20	83	44	39	25	13	12	51	28	23	1	58	31	27	19	25	14	11	6	38	32	16	16	5	14	28	14	14	29	16	13	4	2	2	3	2	1	112.82	4.32	50	0	0
23	Quintana Roo	4	Othón P. Blanco	2146	Explorean Costa Maya	874427	183347	5	4	*	*	*	*	*	*	*	*	*	*	*	*	*	*	*	*	*	*	*	*	*	*	*	*	*	*	*	*	*	*	*	*	*	*	*	*	*	*	*	*
23	Quintana Roo	4	Othón P. Blanco	2149	Francisco	883956	183227	20	1	*	*	*	*	*	*	*	*	*	*	*	*	*	*	*	*	*	*	*	*	*	*	*	*	*	*	*	*	*	*	*	*	*	*	*	*	*	*	*	*
23	Quintana Roo	4	Othón P. Blanco	2155	Hermanos R	884342	183320	20	5	*	*	*	*	*	*	*	*	*	*	*	*	*	*	*	*	*	*	*	*	*	*	*	*	*	*	*	*	*	*	*	*	*	*	*	*	*	*	*	*
23	Quintana Roo	4	Othón P. Blanco	2163	Kon Hun Beach	874334	184000	5	2	*	*	*	*	*	*	*	*	*	*	*	*	*	*	*	*	*	*	*	*	*	*	*	*	*	*	*	*	*	*	*	*	*	*	*	*	*	*	*	*
23	Quintana Roo	4	Othón P. Blanco	2165	Rancho Viviana	874338	183857	5	4	*	*	*	*	*	*	*	*	*	*	*	*	*	*	*	*	*	*	*	*	*	*	*	*	*	*	*	*	*	*	*	*	*	*	*	*	*	*	*	*
23	Quintana Roo	4	Othón P. Blanco	2169	Kailum	874347	183758	5	2	*	*	*	*	*	*	*	*	*	*	*	*	*	*	*	*	*	*	*	*	*	*	*	*	*	*	*	*	*	*	*	*	*	*	*	*	*	*	*	*
23	Quintana Roo	4	Othón P. Blanco	2177	Localidad sin Nombre	882713	184259	10	2	*	*	*	*	*	*	*	*	*	*	*	*	*	*	*	*	*	*	*	*	*	*	*	*	*	*	*	*	*	*	*	*	*	*	*	*	*	*	*	*
23	Quintana Roo	4	Othón P. Blanco	2179	Localidad sin Nombre	882726	184545	10	2	*	*	*	*	*	*	*	*	*	*	*	*	*	*	*	*	*	*	*	*	*	*	*	*	*	*	*	*	*	*	*	*	*	*	*	*	*	*	*	*
23	Quintana Roo	4	Othón P. Blanco	2186	Mayajade	874538	183633	5	8	*	*	*	*	*	*	*	*	*	*	*	*	*	*	*	*	*	*	*	*	*	*	*	*	*	*	*	*	*	*	*	*	*	*	*	*	*	*	*	*
23	Quintana Roo	4	Othón P. Blanco	2187	Javier Sandoval	883320	184627	15	1	*	*	*	*	*	*	*	*	*	*	*	*	*	*	*	*	*	*	*	*	*	*	*	*	*	*	*	*	*	*	*	*	*	*	*	*	*	*	*	*
23	Quintana Roo	4	Othón P. Blanco	2190	José Luis Catzín	875348	185627	20	6	*	*	*	*	*	*	*	*	*	*	*	*	*	*	*	*	*	*	*	*	*	*	*	*	*	*	*	*	*	*	*	*	*	*	*	*	*	*	*	*
23	Quintana Roo	4	Othón P. Blanco	2194	Kabah-Na	874336	183907	5	3	*	*	*	*	*	*	*	*	*	*	*	*	*	*	*	*	*	*	*	*	*	*	*	*	*	*	*	*	*	*	*	*	*	*	*	*	*	*	*	*
23	Quintana Roo	4	Othón P. Blanco	2198	El Makulí	874203	184526	5	15	*	*	*	*	*	*	*	*	*	*	*	*	*	*	*	*	*	*	*	*	*	*	*	*	*	*	*	*	*	*	*	*	*	*	*	*	*	*	*	*
23	Quintana Roo	4	Othón P. Blanco	2206	Montecristo	885915	184242	80	1	*	*	*	*	*	*	*	*	*	*	*	*	*	*	*	*	*	*	*	*	*	*	*	*	*	*	*	*	*	*	*	*	*	*	*	*	*	*	*	*
23	Quintana Roo	4	Othón P. Blanco	2216	El Porvenir	890402	185857	100	11	*	*	*	*	*	*	*	*	*	*	*	*	*	*	*	*	*	*	*	*	*	*	*	*	*	*	*	*	*	*	*	*	*	*	*	*	*	*	*	*
23	Quintana Roo	4	Othón P. Blanco	2226	Reyna	882312	184202	15	3	*	*	*	*	*	*	*	*	*	*	*	*	*	*	*	*	*	*	*	*	*	*	*	*	*	*	*	*	*	*	*	*	*	*	*	*	*	*	*	*
23	Quintana Roo	4	Othón P. Blanco	2228	Roberto Salgado	881625	184607	10	3	*	*	*	*	*	*	*	*	*	*	*	*	*	*	*	*	*	*	*	*	*	*	*	*	*	*	*	*	*	*	*	*	*	*	*	*	*	*	*	*
23	Quintana Roo	4	Othón P. Blanco	2231	Localidad sin Nombre	884855	183703	100	4	*	*	*	*	*	*	*	*	*	*	*	*	*	*	*	*	*	*	*	*	*	*	*	*	*	*	*	*	*	*	*	*	*	*	*	*	*	*	*	*
23	Quintana Roo	4	Othón P. Blanco	2234	El Salvador	883759	183322	20	7	*	*	*	*	*	*	*	*	*	*	*	*	*	*	*	*	*	*	*	*	*	*	*	*	*	*	*	*	*	*	*	*	*	*	*	*	*	*	*	*
23	Quintana Roo	4	Othón P. Blanco	2236	San Ramón	882244	184302	10	15	*	*	*	*	*	*	*	*	*	*	*	*	*	*	*	*	*	*	*	*	*	*	*	*	*	*	*	*	*	*	*	*	*	*	*	*	*	*	*	*
23	Quintana Roo	4	Othón P. Blanco	2239	Sin Duda Villas	874833	182042	5	2	*	*	*	*	*	*	*	*	*	*	*	*	*	*	*	*	*	*	*	*	*	*	*	*	*	*	*	*	*	*	*	*	*	*	*	*	*	*	*	*
23	Quintana Roo	4	Othón P. Blanco	2245	Tierra Maya	874956	181748	5	3	*	*	*	*	*	*	*	*	*	*	*	*	*	*	*	*	*	*	*	*	*	*	*	*	*	*	*	*	*	*	*	*	*	*	*	*	*	*	*	*
23	Quintana Roo	4	Othón P. Blanco	2248	Las Uvas	874335	183953	5	1	*	*	*	*	*	*	*	*	*	*	*	*	*	*	*	*	*	*	*	*	*	*	*	*	*	*	*	*	*	*	*	*	*	*	*	*	*	*	*	*
23	Quintana Roo	4	Othón P. Blanco	2249	Valle de Luna Maya	873528	190023	5	4	*	*	*	*	*	*	*	*	*	*	*	*	*	*	*	*	*	*	*	*	*	*	*	*	*	*	*	*	*	*	*	*	*	*	*	*	*	*	*	*
23	Quintana Roo	4	Othón P. Blanco	2253	Villa de Leyva	881501	184832	10	2	*	*	*	*	*	*	*	*	*	*	*	*	*	*	*	*	*	*	*	*	*	*	*	*	*	*	*	*	*	*	*	*	*	*	*	*	*	*	*	*
23	Quintana Roo	4	Othón P. Blanco	2254	Alfredo Barradas Domínguez	883404	183103	20	2	*	*	*	*	*	*	*	*	*	*	*	*	*	*	*	*	*	*	*	*	*	*	*	*	*	*	*	*	*	*	*	*	*	*	*	*	*	*	*	*
23	Quintana Roo	4	Othón P. Blanco	2256	Colonia Nuevo Progreso	881915	183156	10	4	*	*	*	*	*	*	*	*	*	*	*	*	*	*	*	*	*	*	*	*	*	*	*	*	*	*	*	*	*	*	*	*	*	*	*	*	*	*	*	*
23	Quintana Roo	4	Othón P. Blanco	2258	Localidad sin Nombre	881526	183338	5	2	*	*	*	*	*	*	*	*	*	*	*	*	*	*	*	*	*	*	*	*	*	*	*	*	*	*	*	*	*	*	*	*	*	*	*	*	*	*	*	*
23	Quintana Roo	4	Othón P. Blanco	2261	Loma Seca	883337	183037	20	4	*	*	*	*	*	*	*	*	*	*	*	*	*	*	*	*	*	*	*	*	*	*	*	*	*	*	*	*	*	*	*	*	*	*	*	*	*	*	*	*
23	Quintana Roo	4	Othón P. Blanco	2262	Martina López Cortés	881524	183335	5	6	*	*	*	*	*	*	*	*	*	*	*	*	*	*	*	*	*	*	*	*	*	*	*	*	*	*	*	*	*	*	*	*	*	*	*	*	*	*	*	*
23	Quintana Roo	4	Othón P. Blanco	2264	Pedro Rosales Jaime	882412	184101	15	1	*	*	*	*	*	*	*	*	*	*	*	*	*	*	*	*	*	*	*	*	*	*	*	*	*	*	*	*	*	*	*	*	*	*	*	*	*	*	*	*
23	Quintana Roo	4	Othón P. Blanco	2266	Poot Bradley	881525	183337	5	2	*	*	*	*	*	*	*	*	*	*	*	*	*	*	*	*	*	*	*	*	*	*	*	*	*	*	*	*	*	*	*	*	*	*	*	*	*	*	*	*
23	Quintana Roo	4	Othón P. Blanco	2276	Bacalar	882419	184033	15	2	*	*	*	*	*	*	*	*	*	*	*	*	*	*	*	*	*	*	*	*	*	*	*	*	*	*	*	*	*	*	*	*	*	*	*	*	*	*	*	*
23	Quintana Roo	4	Othón P. Blanco	2283	El Danto	883038	184432	15	1	*	*	*	*	*	*	*	*	*	*	*	*	*	*	*	*	*	*	*	*	*	*	*	*	*	*	*	*	*	*	*	*	*	*	*	*	*	*	*	*
23	Quintana Roo	4	Othón P. Blanco	2286	Eduardo Ovando	881736	183819	10	1	*	*	*	*	*	*	*	*	*	*	*	*	*	*	*	*	*	*	*	*	*	*	*	*	*	*	*	*	*	*	*	*	*	*	*	*	*	*	*	*
23	Quintana Roo	4	Othón P. Blanco	2288	Ernesto Hernández	881408	184909	10	2	*	*	*	*	*	*	*	*	*	*	*	*	*	*	*	*	*	*	*	*	*	*	*	*	*	*	*	*	*	*	*	*	*	*	*	*	*	*	*	*
23	Quintana Roo	4	Othón P. Blanco	2291	La Fe	875130	181610	5	4	*	*	*	*	*	*	*	*	*	*	*	*	*	*	*	*	*	*	*	*	*	*	*	*	*	*	*	*	*	*	*	*	*	*	*	*	*	*	*	*
23	Quintana Roo	4	Othón P. Blanco	2292	Federico Feria Peralta	882505	184252	10	1	*	*	*	*	*	*	*	*	*	*	*	*	*	*	*	*	*	*	*	*	*	*	*	*	*	*	*	*	*	*	*	*	*	*	*	*	*	*	*	*
23	Quintana Roo	4	Othón P. Blanco	2294	La Guacamaya	874818	182054	5	2	*	*	*	*	*	*	*	*	*	*	*	*	*	*	*	*	*	*	*	*	*	*	*	*	*	*	*	*	*	*	*	*	*	*	*	*	*	*	*	*
23	Quintana Roo	4	Othón P. Blanco	2295	Guerreros	880200	185825	5	6	*	*	*	*	*	*	*	*	*	*	*	*	*	*	*	*	*	*	*	*	*	*	*	*	*	*	*	*	*	*	*	*	*	*	*	*	*	*	*	*
23	Quintana Roo	4	Othón P. Blanco	2303	Localidad sin Nombre	881347	184933	10	3	*	*	*	*	*	*	*	*	*	*	*	*	*	*	*	*	*	*	*	*	*	*	*	*	*	*	*	*	*	*	*	*	*	*	*	*	*	*	*	*
23	Quintana Roo	4	Othón P. Blanco	2306	Javier Rojo Gómez	884115	181602	50	42	23	19	3	3	0	14	9	5	0	39	20	19	7	11	6	5	4	32	28	14	14	9	12	27	14	13	25	13	12	1	0	1	0	0	0	121.05	2.06	39	0	0
23	Quintana Roo	4	Othón P. Blanco	2308	Jorge Cano	882811	184552	15	2	*	*	*	*	*	*	*	*	*	*	*	*	*	*	*	*	*	*	*	*	*	*	*	*	*	*	*	*	*	*	*	*	*	*	*	*	*	*	*	*
23	Quintana Roo	4	Othón P. Blanco	2313	Jung Matthee	874335	183913	5	4	*	*	*	*	*	*	*	*	*	*	*	*	*	*	*	*	*	*	*	*	*	*	*	*	*	*	*	*	*	*	*	*	*	*	*	*	*	*	*	*
23	Quintana Roo	4	Othón P. Blanco	2315	El Kiwi	890506	185703	100	2	*	*	*	*	*	*	*	*	*	*	*	*	*	*	*	*	*	*	*	*	*	*	*	*	*	*	*	*	*	*	*	*	*	*	*	*	*	*	*	*
23	Quintana Roo	4	Othón P. Blanco	2316	Lázaro Cruz López	882409	184048	15	5	*	*	*	*	*	*	*	*	*	*	*	*	*	*	*	*	*	*	*	*	*	*	*	*	*	*	*	*	*	*	*	*	*	*	*	*	*	*	*	*
23	Quintana Roo	4	Othón P. Blanco	2320	Merari Can	882839	184626	15	3	*	*	*	*	*	*	*	*	*	*	*	*	*	*	*	*	*	*	*	*	*	*	*	*	*	*	*	*	*	*	*	*	*	*	*	*	*	*	*	*
23	Quintana Roo	4	Othón P. Blanco	2326	El Pedregal	881956	184633	10	1	*	*	*	*	*	*	*	*	*	*	*	*	*	*	*	*	*	*	*	*	*	*	*	*	*	*	*	*	*	*	*	*	*	*	*	*	*	*	*	*
23	Quintana Roo	4	Othón P. Blanco	2328	Las Piñas	885919	185829	100	7	*	*	*	*	*	*	*	*	*	*	*	*	*	*	*	*	*	*	*	*	*	*	*	*	*	*	*	*	*	*	*	*	*	*	*	*	*	*	*	*
23	Quintana Roo	4	Othón P. Blanco	2330	Ramón	881744	183912	10	6	*	*	*	*	*	*	*	*	*	*	*	*	*	*	*	*	*	*	*	*	*	*	*	*	*	*	*	*	*	*	*	*	*	*	*	*	*	*	*	*
23	Quintana Roo	4	Othón P. Blanco	2337	San Isidro	874256	184149	5	11	5	6	1	0	1	1	0	1	0	10	5	5	0	0	0	0	0	10	10	5	5	3	4	9	4	5	9	4	5	1	1	0	0	0	0	83.33	2.2	9	1	1
23	Quintana Roo	4	Othón P. Blanco	2340	Las Tres Marías	881645	183741	10	1	*	*	*	*	*	*	*	*	*	*	*	*	*	*	*	*	*	*	*	*	*	*	*	*	*	*	*	*	*	*	*	*	*	*	*	*	*	*	*	*
23	Quintana Roo	4	Othón P. Blanco	2341	Las Tres Marías	890225	190243	60	4	*	*	*	*	*	*	*	*	*	*	*	*	*	*	*	*	*	*	*	*	*	*	*	*	*	*	*	*	*	*	*	*	*	*	*	*	*	*	*	*
23	Quintana Roo	4	Othón P. Blanco	2348	El Paraíso	874331	184542	5	10	*	*	*	*	*	*	*	*	*	*	*	*	*	*	*	*	*	*	*	*	*	*	*	*	*	*	*	*	*	*	*	*	*	*	*	*	*	*	*	*
23	Quintana Roo	4	Othón P. Blanco	2352	Nuevo Jesús	885243	184018	60	8	*	*	*	*	*	*	*	*	*	*	*	*	*	*	*	*	*	*	*	*	*	*	*	*	*	*	*	*	*	*	*	*	*	*	*	*	*	*	*	*
23	Quintana Roo	4	Othón P. Blanco	2357	Localidad sin Nombre	881908	184249	10	2	*	*	*	*	*	*	*	*	*	*	*	*	*	*	*	*	*	*	*	*	*	*	*	*	*	*	*	*	*	*	*	*	*	*	*	*	*	*	*	*
23	Quintana Roo	4	Othón P. Blanco	2362	Los Tres Reyes	881518	183707	10	2	*	*	*	*	*	*	*	*	*	*	*	*	*	*	*	*	*	*	*	*	*	*	*	*	*	*	*	*	*	*	*	*	*	*	*	*	*	*	*	*
23	Quintana Roo	4	Othón P. Blanco	2363	Santa Lucía	881345	183640	10	1	*	*	*	*	*	*	*	*	*	*	*	*	*	*	*	*	*	*	*	*	*	*	*	*	*	*	*	*	*	*	*	*	*	*	*	*	*	*	*	*
23	Quintana Roo	4	Othón P. Blanco	2364	Villa Valentina	881334	183641	10	2	*	*	*	*	*	*	*	*	*	*	*	*	*	*	*	*	*	*	*	*	*	*	*	*	*	*	*	*	*	*	*	*	*	*	*	*	*	*	*	*
23	Quintana Roo	4	Othón P. Blanco	2367	La Esperanza	884022	182832	50	4	*	*	*	*	*	*	*	*	*	*	*	*	*	*	*	*	*	*	*	*	*	*	*	*	*	*	*	*	*	*	*	*	*	*	*	*	*	*	*	*
23	Quintana Roo	4	Othón P. Blanco	2368	El Mameyal	885605	182016	100	8	*	*	*	*	*	*	*	*	*	*	*	*	*	*	*	*	*	*	*	*	*	*	*	*	*	*	*	*	*	*	*	*	*	*	*	*	*	*	*	*
23	Quintana Roo	4	Othón P. Blanco	2370	El Sacrificio	885514	182512	130	4	*	*	*	*	*	*	*	*	*	*	*	*	*	*	*	*	*	*	*	*	*	*	*	*	*	*	*	*	*	*	*	*	*	*	*	*	*	*	*	*
23	Quintana Roo	4	Othón P. Blanco	2373	La Unión	885442	182315	130	1	*	*	*	*	*	*	*	*	*	*	*	*	*	*	*	*	*	*	*	*	*	*	*	*	*	*	*	*	*	*	*	*	*	*	*	*	*	*	*	*
23	Quintana Roo	4	Othón P. Blanco	2379	El Arenal	874307	184120	5	3	*	*	*	*	*	*	*	*	*	*	*	*	*	*	*	*	*	*	*	*	*	*	*	*	*	*	*	*	*	*	*	*	*	*	*	*	*	*	*	*
23	Quintana Roo	4	Othón P. Blanco	2381	Balam Kú	874317	184050	5	3	*	*	*	*	*	*	*	*	*	*	*	*	*	*	*	*	*	*	*	*	*	*	*	*	*	*	*	*	*	*	*	*	*	*	*	*	*	*	*	*
23	Quintana Roo	4	Othón P. Blanco	2386	La Concepción	883817	183306	20	8	*	*	*	*	*	*	*	*	*	*	*	*	*	*	*	*	*	*	*	*	*	*	*	*	*	*	*	*	*	*	*	*	*	*	*	*	*	*	*	*
23	Quintana Roo	4	Othón P. Blanco	2392	Gary McConell	874357	183717	5	2	*	*	*	*	*	*	*	*	*	*	*	*	*	*	*	*	*	*	*	*	*	*	*	*	*	*	*	*	*	*	*	*	*	*	*	*	*	*	*	*
23	Quintana Roo	4	Othón P. Blanco	2400	Melissa	874959	181745	5	2	*	*	*	*	*	*	*	*	*	*	*	*	*	*	*	*	*	*	*	*	*	*	*	*	*	*	*	*	*	*	*	*	*	*	*	*	*	*	*	*
23	Quintana Roo	4	Othón P. Blanco	2401	Kimmels	874949	181810	5	3	*	*	*	*	*	*	*	*	*	*	*	*	*	*	*	*	*	*	*	*	*	*	*	*	*	*	*	*	*	*	*	*	*	*	*	*	*	*	*	*
23	Quintana Roo	4	Othón P. Blanco	2414	Localidad sin Nombre	883652	183257	20	4	*	*	*	*	*	*	*	*	*	*	*	*	*	*	*	*	*	*	*	*	*	*	*	*	*	*	*	*	*	*	*	*	*	*	*	*	*	*	*	*
23	Quintana Roo	4	Othón P. Blanco	2417	Jelw	874959	181742	5	3	*	*	*	*	*	*	*	*	*	*	*	*	*	*	*	*	*	*	*	*	*	*	*	*	*	*	*	*	*	*	*	*	*	*	*	*	*	*	*	*
23	Quintana Roo	4	Othón P. Blanco	2424	El Oasis	874853	185116	5	3	*	*	*	*	*	*	*	*	*	*	*	*	*	*	*	*	*	*	*	*	*	*	*	*	*	*	*	*	*	*	*	*	*	*	*	*	*	*	*	*
23	Quintana Roo	4	Othón P. Blanco	2425	El Oasis	873524	190031	5	6	5	1	0	0	0	0	0	0	0	6	5	1	0	0	0	0	0	6	6	5	1	0	0	4	3	1	6	5	1	2	2	0	2	2	0	500	3	6	0	0
23	Quintana Roo	4	Othón P. Blanco	2426	La Palapa Campestre	882156	183058	10	5	*	*	*	*	*	*	*	*	*	*	*	*	*	*	*	*	*	*	*	*	*	*	*	*	*	*	*	*	*	*	*	*	*	*	*	*	*	*	*	*
23	Quintana Roo	4	Othón P. Blanco	2427	Paradise Lodge	873758	185405	5	2	*	*	*	*	*	*	*	*	*	*	*	*	*	*	*	*	*	*	*	*	*	*	*	*	*	*	*	*	*	*	*	*	*	*	*	*	*	*	*	*
23	Quintana Roo	4	Othón P. Blanco	2428	El Placer	873759	185403	5	2	*	*	*	*	*	*	*	*	*	*	*	*	*	*	*	*	*	*	*	*	*	*	*	*	*	*	*	*	*	*	*	*	*	*	*	*	*	*	*	*
23	Quintana Roo	4	Othón P. Blanco	2430	Rancho Escorpión	874341	183850	5	3	*	*	*	*	*	*	*	*	*	*	*	*	*	*	*	*	*	*	*	*	*	*	*	*	*	*	*	*	*	*	*	*	*	*	*	*	*	*	*	*
23	Quintana Roo	4	Othón P. Blanco	2438	San Judas Tadeo	882339	183448	10	2	*	*	*	*	*	*	*	*	*	*	*	*	*	*	*	*	*	*	*	*	*	*	*	*	*	*	*	*	*	*	*	*	*	*	*	*	*	*	*	*
23	Quintana Roo	4	Othón P. Blanco	2439	Santa Teresa	882343	183550	10	1	*	*	*	*	*	*	*	*	*	*	*	*	*	*	*	*	*	*	*	*	*	*	*	*	*	*	*	*	*	*	*	*	*	*	*	*	*	*	*	*
23	Quintana Roo	4	Othón P. Blanco	2442	Travel In	874327	184022	5	8	*	*	*	*	*	*	*	*	*	*	*	*	*	*	*	*	*	*	*	*	*	*	*	*	*	*	*	*	*	*	*	*	*	*	*	*	*	*	*	*
23	Quintana Roo	4	Othón P. Blanco	2449	Alan	874335	183950	5	3	*	*	*	*	*	*	*	*	*	*	*	*	*	*	*	*	*	*	*	*	*	*	*	*	*	*	*	*	*	*	*	*	*	*	*	*	*	*	*	*
23	Quintana Roo	4	Othón P. Blanco	2459	Juan Solís	885007	183744	100	7	*	*	*	*	*	*	*	*	*	*	*	*	*	*	*	*	*	*	*	*	*	*	*	*	*	*	*	*	*	*	*	*	*	*	*	*	*	*	*	*
23	Quintana Roo	4	Othón P. Blanco	2463	Rancho Rafael	884914	182955	90	6	*	*	*	*	*	*	*	*	*	*	*	*	*	*	*	*	*	*	*	*	*	*	*	*	*	*	*	*	*	*	*	*	*	*	*	*	*	*	*	*
23	Quintana Roo	4	Othón P. Blanco	2464	Albin Casa del Mar	874839	182034	5	5	*	*	*	*	*	*	*	*	*	*	*	*	*	*	*	*	*	*	*	*	*	*	*	*	*	*	*	*	*	*	*	*	*	*	*	*	*	*	*	*
23	Quintana Roo	4	Othón P. Blanco	2466	Localidad sin Nombre	874552	182759	5	2	*	*	*	*	*	*	*	*	*	*	*	*	*	*	*	*	*	*	*	*	*	*	*	*	*	*	*	*	*	*	*	*	*	*	*	*	*	*	*	*
23	Quintana Roo	4	Othón P. Blanco	2468	Nuestro Tesoro	874841	182032	5	4	*	*	*	*	*	*	*	*	*	*	*	*	*	*	*	*	*	*	*	*	*	*	*	*	*	*	*	*	*	*	*	*	*	*	*	*	*	*	*	*
23	Quintana Roo	4	Othón P. Blanco	2469	Pelícano Beach	874422	183440	5	2	*	*	*	*	*	*	*	*	*	*	*	*	*	*	*	*	*	*	*	*	*	*	*	*	*	*	*	*	*	*	*	*	*	*	*	*	*	*	*	*
23	Quintana Roo	4	Othón P. Blanco	2471	El Naranjalito	884713	180235	80	1	*	*	*	*	*	*	*	*	*	*	*	*	*	*	*	*	*	*	*	*	*	*	*	*	*	*	*	*	*	*	*	*	*	*	*	*	*	*	*	*
23	Quintana Roo	4	Othón P. Blanco	2473	La Herradura	881335	185954	25	4	*	*	*	*	*	*	*	*	*	*	*	*	*	*	*	*	*	*	*	*	*	*	*	*	*	*	*	*	*	*	*	*	*	*	*	*	*	*	*	*
23	Quintana Roo	4	Othón P. Blanco	2476	El Aluxe	873910	185052	5	6	*	*	*	*	*	*	*	*	*	*	*	*	*	*	*	*	*	*	*	*	*	*	*	*	*	*	*	*	*	*	*	*	*	*	*	*	*	*	*	*
23	Quintana Roo	4	Othón P. Blanco	2485	Precius Cristal	873627	185843	5	2	*	*	*	*	*	*	*	*	*	*	*	*	*	*	*	*	*	*	*	*	*	*	*	*	*	*	*	*	*	*	*	*	*	*	*	*	*	*	*	*
23	Quintana Roo	4	Othón P. Blanco	2486	Rancho Gabriela	874508	184012	5	4	*	*	*	*	*	*	*	*	*	*	*	*	*	*	*	*	*	*	*	*	*	*	*	*	*	*	*	*	*	*	*	*	*	*	*	*	*	*	*	*
23	Quintana Roo	4	Othón P. Blanco	2487	La Esmeralda	875129	181636	5	8	*	*	*	*	*	*	*	*	*	*	*	*	*	*	*	*	*	*	*	*	*	*	*	*	*	*	*	*	*	*	*	*	*	*	*	*	*	*	*	*
23	Quintana Roo	4	Othón P. Blanco	2493	Lo 3 Ases	890608	183124	120	13	*	*	*	*	*	*	*	*	*	*	*	*	*	*	*	*	*	*	*	*	*	*	*	*	*	*	*	*	*	*	*	*	*	*	*	*	*	*	*	*
23	Quintana Roo	4	Othón P. Blanco	2495	Los 3 Potrillos	881750	183944	10	1	*	*	*	*	*	*	*	*	*	*	*	*	*	*	*	*	*	*	*	*	*	*	*	*	*	*	*	*	*	*	*	*	*	*	*	*	*	*	*	*
23	Quintana Roo	4	Othón P. Blanco	2496	Arnulfo Ceja	882038	183001	10	1	*	*	*	*	*	*	*	*	*	*	*	*	*	*	*	*	*	*	*	*	*	*	*	*	*	*	*	*	*	*	*	*	*	*	*	*	*	*	*	*
23	Quintana Roo	4	Othón P. Blanco	2497	Carlos Gómez	881351	183531	5	3	*	*	*	*	*	*	*	*	*	*	*	*	*	*	*	*	*	*	*	*	*	*	*	*	*	*	*	*	*	*	*	*	*	*	*	*	*	*	*	*
23	Quintana Roo	4	Othón P. Blanco	2498	Chumbec	881905	183353	10	3	*	*	*	*	*	*	*	*	*	*	*	*	*	*	*	*	*	*	*	*	*	*	*	*	*	*	*	*	*	*	*	*	*	*	*	*	*	*	*	*
23	Quintana Roo	4	Othón P. Blanco	2499	Las Cicadas	881617	183301	5	6	*	*	*	*	*	*	*	*	*	*	*	*	*	*	*	*	*	*	*	*	*	*	*	*	*	*	*	*	*	*	*	*	*	*	*	*	*	*	*	*
23	Quintana Roo	4	Othón P. Blanco	2500	Colli	881612	183250	5	4	*	*	*	*	*	*	*	*	*	*	*	*	*	*	*	*	*	*	*	*	*	*	*	*	*	*	*	*	*	*	*	*	*	*	*	*	*	*	*	*
23	Quintana Roo	4	Othón P. Blanco	2502	Cornelio Witzil	882111	182935	10	3	*	*	*	*	*	*	*	*	*	*	*	*	*	*	*	*	*	*	*	*	*	*	*	*	*	*	*	*	*	*	*	*	*	*	*	*	*	*	*	*
23	Quintana Roo	4	Othón P. Blanco	2503	Don Saba	881952	183238	10	7	*	*	*	*	*	*	*	*	*	*	*	*	*	*	*	*	*	*	*	*	*	*	*	*	*	*	*	*	*	*	*	*	*	*	*	*	*	*	*	*
23	Quintana Roo	4	Othón P. Blanco	2504	Los Dos Potrillos	882049	183249	10	1	*	*	*	*	*	*	*	*	*	*	*	*	*	*	*	*	*	*	*	*	*	*	*	*	*	*	*	*	*	*	*	*	*	*	*	*	*	*	*	*
23	Quintana Roo	4	Othón P. Blanco	2505	2 Pozos	885751	182732	130	1	*	*	*	*	*	*	*	*	*	*	*	*	*	*	*	*	*	*	*	*	*	*	*	*	*	*	*	*	*	*	*	*	*	*	*	*	*	*	*	*
23	Quintana Roo	4	Othón P. Blanco	2506	Emiliano Zapata	881957	183238	10	3	*	*	*	*	*	*	*	*	*	*	*	*	*	*	*	*	*	*	*	*	*	*	*	*	*	*	*	*	*	*	*	*	*	*	*	*	*	*	*	*
23	Quintana Roo	4	Othón P. Blanco	2508	El Gaucho	885538	182652	120	8	*	*	*	*	*	*	*	*	*	*	*	*	*	*	*	*	*	*	*	*	*	*	*	*	*	*	*	*	*	*	*	*	*	*	*	*	*	*	*	*
23	Quintana Roo	4	Othón P. Blanco	2509	La Gran Batalla	882014	183309	10	4	*	*	*	*	*	*	*	*	*	*	*	*	*	*	*	*	*	*	*	*	*	*	*	*	*	*	*	*	*	*	*	*	*	*	*	*	*	*	*	*
23	Quintana Roo	4	Othón P. Blanco	2510	Rancho Guzman	885445	182331	100	1	*	*	*	*	*	*	*	*	*	*	*	*	*	*	*	*	*	*	*	*	*	*	*	*	*	*	*	*	*	*	*	*	*	*	*	*	*	*	*	*
23	Quintana Roo	4	Othón P. Blanco	2511	Los Hermanos	881739	183302	10	10	6	4	1	0	1	3	2	1	0	9	6	3	2	2	2	0	0	7	7	4	3	4	2	6	4	2	6	4	2	1	0	1	0	0	0	150	3.67	9	0	0
23	Quintana Roo	4	Othón P. Blanco	2512	Hugo Trejo	882445	183042	10	8	*	*	*	*	*	*	*	*	*	*	*	*	*	*	*	*	*	*	*	*	*	*	*	*	*	*	*	*	*	*	*	*	*	*	*	*	*	*	*	*
23	Quintana Roo	4	Othón P. Blanco	2513	Las Ilusiones	881621	183221	5	7	*	*	*	*	*	*	*	*	*	*	*	*	*	*	*	*	*	*	*	*	*	*	*	*	*	*	*	*	*	*	*	*	*	*	*	*	*	*	*	*
23	Quintana Roo	4	Othón P. Blanco	2515	Jaime Peraza	881717	183313	5	4	*	*	*	*	*	*	*	*	*	*	*	*	*	*	*	*	*	*	*	*	*	*	*	*	*	*	*	*	*	*	*	*	*	*	*	*	*	*	*	*
23	Quintana Roo	4	Othón P. Blanco	2516	Jorge Caamal (9006)	881356	184341	10	1	*	*	*	*	*	*	*	*	*	*	*	*	*	*	*	*	*	*	*	*	*	*	*	*	*	*	*	*	*	*	*	*	*	*	*	*	*	*	*	*
23	Quintana Roo	4	Othón P. Blanco	2517	José Amaro	881437	183421	5	2	*	*	*	*	*	*	*	*	*	*	*	*	*	*	*	*	*	*	*	*	*	*	*	*	*	*	*	*	*	*	*	*	*	*	*	*	*	*	*	*
23	Quintana Roo	4	Othón P. Blanco	2518	Los Lirios	884532	183111	50	3	*	*	*	*	*	*	*	*	*	*	*	*	*	*	*	*	*	*	*	*	*	*	*	*	*	*	*	*	*	*	*	*	*	*	*	*	*	*	*	*
23	Quintana Roo	4	Othón P. Blanco	2519	Localidad sin Nombre	881610	184504	10	1	*	*	*	*	*	*	*	*	*	*	*	*	*	*	*	*	*	*	*	*	*	*	*	*	*	*	*	*	*	*	*	*	*	*	*	*	*	*	*	*
23	Quintana Roo	4	Othón P. Blanco	2520	Localidad sin Nombre	881617	183253	5	6	*	*	*	*	*	*	*	*	*	*	*	*	*	*	*	*	*	*	*	*	*	*	*	*	*	*	*	*	*	*	*	*	*	*	*	*	*	*	*	*
23	Quintana Roo	4	Othón P. Blanco	2522	Localidad sin Nombre	884435	183247	20	3	*	*	*	*	*	*	*	*	*	*	*	*	*	*	*	*	*	*	*	*	*	*	*	*	*	*	*	*	*	*	*	*	*	*	*	*	*	*	*	*
23	Quintana Roo	4	Othón P. Blanco	2523	Luis Pat	881403	183514	5	1	*	*	*	*	*	*	*	*	*	*	*	*	*	*	*	*	*	*	*	*	*	*	*	*	*	*	*	*	*	*	*	*	*	*	*	*	*	*	*	*
23	Quintana Roo	4	Othón P. Blanco	2524	Las Margaritas	881621	183256	5	1	*	*	*	*	*	*	*	*	*	*	*	*	*	*	*	*	*	*	*	*	*	*	*	*	*	*	*	*	*	*	*	*	*	*	*	*	*	*	*	*
23	Quintana Roo	4	Othón P. Blanco	2525	Lilia Mercedes Ávila Palomo	882258	183102	10	2	*	*	*	*	*	*	*	*	*	*	*	*	*	*	*	*	*	*	*	*	*	*	*	*	*	*	*	*	*	*	*	*	*	*	*	*	*	*	*	*
23	Quintana Roo	4	Othón P. Blanco	2526	Moisés Pacheco Briceño	882013	183316	10	2	*	*	*	*	*	*	*	*	*	*	*	*	*	*	*	*	*	*	*	*	*	*	*	*	*	*	*	*	*	*	*	*	*	*	*	*	*	*	*	*
23	Quintana Roo	4	Othón P. Blanco	2527	Las Palmas	882016	183242	10	3	*	*	*	*	*	*	*	*	*	*	*	*	*	*	*	*	*	*	*	*	*	*	*	*	*	*	*	*	*	*	*	*	*	*	*	*	*	*	*	*
23	Quintana Roo	4	Othón P. Blanco	2528	Pedro Garcia	882056	182947	10	1	*	*	*	*	*	*	*	*	*	*	*	*	*	*	*	*	*	*	*	*	*	*	*	*	*	*	*	*	*	*	*	*	*	*	*	*	*	*	*	*
23	Quintana Roo	4	Othón P. Blanco	2529	La Perla	885425	182501	100	1	*	*	*	*	*	*	*	*	*	*	*	*	*	*	*	*	*	*	*	*	*	*	*	*	*	*	*	*	*	*	*	*	*	*	*	*	*	*	*	*
23	Quintana Roo	4	Othón P. Blanco	2534	San Judas Tadeo	881721	183316	10	4	*	*	*	*	*	*	*	*	*	*	*	*	*	*	*	*	*	*	*	*	*	*	*	*	*	*	*	*	*	*	*	*	*	*	*	*	*	*	*	*
23	Quintana Roo	4	Othón P. Blanco	2535	El Subim	881928	183233	10	2	*	*	*	*	*	*	*	*	*	*	*	*	*	*	*	*	*	*	*	*	*	*	*	*	*	*	*	*	*	*	*	*	*	*	*	*	*	*	*	*
23	Quintana Roo	4	Othón P. Blanco	2537	Aurelio Uh Xool	881613	183256	5	6	*	*	*	*	*	*	*	*	*	*	*	*	*	*	*	*	*	*	*	*	*	*	*	*	*	*	*	*	*	*	*	*	*	*	*	*	*	*	*	*
23	Quintana Roo	4	Othón P. Blanco	9998	Localidades de una vivienda				1196	661	535	133	60	73	339	158	181	32	1018	578	440	114	174	81	93	60	872	812	480	332	217	276	676	368	308	744	446	298	136	112	24	87	74	13	123.55	2.54	867	140	86
23	Quintana Roo	4	Othón P. Blanco	9999	Localidades de dos viviendas				388	213	175	39	20	19	108	52	56	10	324	180	144	40	59	25	34	19	274	255	148	107	77	86	210	116	94	232	134	98	45	32	13	29	22	7	121.71	3.09	295	25	17
23	Quintana Roo	5	Benito Juárez	0	Total del Municipio				572973	289293	283680	51013	25814	25199	150425	76353	74072	10432	429389	217184	212205	59909	88980	45222	43758	29071	359048	329977	166645	163332	97059	142954	313954	159145	154809	302420	152581	149839	16023	7500	8523	9746	4472	5274	101.98	1.93	363073	61854	31657
23	Quintana Roo	5	Benito Juárez	1	Cancún	865051	210938	8	526701	265547	261154	46533	23549	22984	138046	69980	68066	9507	399464	201634	197830	55115	82006	41600	40406	26891	334842	307951	155203	152748	90062	133795	293282	148438	144844	282488	142226	140262	14669	6765	7904	8923	4031	4892	101.68	1.89	338848	56462	28856
23	Quintana Roo	5	Benito Juárez	2	Alfredo V. Bonfil	865105	210457	10	13822	6997	6825	1309	671	638	3522	1803	1719	242	8532	4338	4194	1342	1971	1018	953	629	6948	6319	3206	3113	2130	2717	5992	3047	2945	5705	2902	2803	327	159	168	194	87	107	102.52	2.37	6679	1772	907
23	Quintana Roo	5	Benito Juárez	3	Leona Vicario	871210	205932	10	5358	2783	2575	580	294	286	1971	1020	951	158	4745	2474	2271	816	1233	640	593	417	3771	3354	1748	1606	1081	1324	3030	1569	1461	2961	1525	1436	324	179	145	213	119	94	108.08	2.82	4570	149	78
23	Quintana Roo	5	Benito Juárez	4	Puerto Morelos	865231	205113	5	1097	552	545	35	13	22	102	54	48	8	456	236	220	37	59	35	24	22	411	389	195	194	72	126	332	167	165	370	186	184	57	28	29	33	18	15	101.28	1.82	372	42	21
23	Quintana Roo	5	Benito Juárez	5	Central Vallarta	870257	205148	5	10	5	5	1	0	1	3	2	1	0	9	5	4	2	2	2	0	0	7	7	3	4	0	1	4	2	2	7	3	4	3	1	2	3	1	2	100	4.5	8	0	0
23	Quintana Roo	5	Benito Juárez	16	Candelaria (Santa Julia)	870428	210257	10	4	*	*	*	*	*	*	*	*	*	*	*	*	*	*	*	*	*	*	*	*	*	*	*	*	*	*	*	*	*	*	*	*	*	*	*	*	*	*	*	*
23	Quintana Roo	5	Benito Juárez	23	Los Compadres	871649	205729	10	4	*	*	*	*	*	*	*	*	*	*	*	*	*	*	*	*	*	*	*	*	*	*	*	*	*	*	*	*	*	*	*	*	*	*	*	*	*	*	*	*
23	Quintana Roo	5	Benito Juárez	24	Joaquín Zetina Gasca	865355	205113	5	6629	3360	3269	587	291	296	1610	806	804	127	3974	2037	1937	613	896	447	449	283	3234	2951	1522	1429	1028	1296	2844	1466	1378	2666	1374	1292	107	56	51	62	32	30	102.78	2.12	2994	954	483
23	Quintana Roo	5	Benito Juárez	25	La Esperanza	865115	210102	5	4	*	*	*	*	*	*	*	*	*	*	*	*	*	*	*	*	*	*	*	*	*	*	*	*	*	*	*	*	*	*	*	*	*	*	*	*	*	*	*	*
23	Quintana Roo	5	Benito Juárez	53	Solidaridad	865711	210709	10	1	*	*	*	*	*	*	*	*	*	*	*	*	*	*	*	*	*	*	*	*	*	*	*	*	*	*	*	*	*	*	*	*	*	*	*	*	*	*	*	*
23	Quintana Roo	5	Benito Juárez	80	Siete Leguas	870310	210338	10	4	*	*	*	*	*	*	*	*	*	*	*	*	*	*	*	*	*	*	*	*	*	*	*	*	*	*	*	*	*	*	*	*	*	*	*	*	*	*	*	*
23	Quintana Roo	5	Benito Juárez	91	Campamento SCT	865116	210101	5	4	*	*	*	*	*	*	*	*	*	*	*	*	*	*	*	*	*	*	*	*	*	*	*	*	*	*	*	*	*	*	*	*	*	*	*	*	*	*	*	*
23	Quintana Roo	5	Benito Juárez	93	Palmira	870021	211031	10	6	*	*	*	*	*	*	*	*	*	*	*	*	*	*	*	*	*	*	*	*	*	*	*	*	*	*	*	*	*	*	*	*	*	*	*	*	*	*	*	*
23	Quintana Roo	5	Benito Juárez	96	La Hacienda del Cielo	870123	211037	10	1	*	*	*	*	*	*	*	*	*	*	*	*	*	*	*	*	*	*	*	*	*	*	*	*	*	*	*	*	*	*	*	*	*	*	*	*	*	*	*	*
23	Quintana Roo	5	Benito Juárez	97	Los Castillo	870253	210338	10	2	*	*	*	*	*	*	*	*	*	*	*	*	*	*	*	*	*	*	*	*	*	*	*	*	*	*	*	*	*	*	*	*	*	*	*	*	*	*	*	*
23	Quintana Roo	5	Benito Juárez	100	El Círculo	865113	210101	5	8	*	*	*	*	*	*	*	*	*	*	*	*	*	*	*	*	*	*	*	*	*	*	*	*	*	*	*	*	*	*	*	*	*	*	*	*	*	*	*	*
23	Quintana Roo	5	Benito Juárez	102	Residencial Campestre	865032	210602	10	761	375	386	4	2	2	40	23	17	2	186	88	98	22	34	19	15	12	162	150	67	83	31	64	133	60	73	141	61	80	17	7	10	14	5	9	97.15	1.73	147	35	16
23	Quintana Roo	5	Benito Juárez	104	San Jorge	870511	211040	10	1	*	*	*	*	*	*	*	*	*	*	*	*	*	*	*	*	*	*	*	*	*	*	*	*	*	*	*	*	*	*	*	*	*	*	*	*	*	*	*	*
23	Quintana Roo	5	Benito Juárez	120	Generación Dos Mil	865530	210717	10	205	108	97	29	12	17	76	43	33	2	157	86	71	26	45	29	16	19	129	110	55	55	23	48	102	50	52	100	50	50	8	5	3	8	5	3	111.34	2.56	113	44	29
23	Quintana Roo	5	Benito Juárez	123	Las Hadas	865953	210515	10	5	*	*	*	*	*	*	*	*	*	*	*	*	*	*	*	*	*	*	*	*	*	*	*	*	*	*	*	*	*	*	*	*	*	*	*	*	*	*	*	*
23	Quintana Roo	5	Benito Juárez	126	La Ilusión	865928	210529	10	7	*	*	*	*	*	*	*	*	*	*	*	*	*	*	*	*	*	*	*	*	*	*	*	*	*	*	*	*	*	*	*	*	*	*	*	*	*	*	*	*
23	Quintana Roo	5	Benito Juárez	129	Los Iñigo	865921	210531	10	5	*	*	*	*	*	*	*	*	*	*	*	*	*	*	*	*	*	*	*	*	*	*	*	*	*	*	*	*	*	*	*	*	*	*	*	*	*	*	*	*
23	Quintana Roo	5	Benito Juárez	134	Rancho de los Pericos	865223	205545	5	8	*	*	*	*	*	*	*	*	*	*	*	*	*	*	*	*	*	*	*	*	*	*	*	*	*	*	*	*	*	*	*	*	*	*	*	*	*	*	*	*
23	Quintana Roo	5	Benito Juárez	135	Marbat	865148	205744	5	3	*	*	*	*	*	*	*	*	*	*	*	*	*	*	*	*	*	*	*	*	*	*	*	*	*	*	*	*	*	*	*	*	*	*	*	*	*	*	*	*
23	Quintana Roo	5	Benito Juárez	139	Monte de los Olivos	870439	211041	10	4	*	*	*	*	*	*	*	*	*	*	*	*	*	*	*	*	*	*	*	*	*	*	*	*	*	*	*	*	*	*	*	*	*	*	*	*	*	*	*	*
23	Quintana Roo	5	Benito Juárez	140	Los Morales	870520	211010	10	4	*	*	*	*	*	*	*	*	*	*	*	*	*	*	*	*	*	*	*	*	*	*	*	*	*	*	*	*	*	*	*	*	*	*	*	*	*	*	*	*
23	Quintana Roo	5	Benito Juárez	143	El Ocaso	870525	211017	10	4	*	*	*	*	*	*	*	*	*	*	*	*	*	*	*	*	*	*	*	*	*	*	*	*	*	*	*	*	*	*	*	*	*	*	*	*	*	*	*	*
23	Quintana Roo	5	Benito Juárez	144	Los Panchos	870212	211037	10	3	*	*	*	*	*	*	*	*	*	*	*	*	*	*	*	*	*	*	*	*	*	*	*	*	*	*	*	*	*	*	*	*	*	*	*	*	*	*	*	*
23	Quintana Roo	5	Benito Juárez	145	Paraíso	865527	205111	5	8	*	*	*	*	*	*	*	*	*	*	*	*	*	*	*	*	*	*	*	*	*	*	*	*	*	*	*	*	*	*	*	*	*	*	*	*	*	*	*	*
23	Quintana Roo	5	Benito Juárez	153	Punta Caracol	865137	205331	5	6	4	2	1	1	0	1	1	0	0	5	3	2	0	0	0	0	0	5	5	3	2	1	1	4	2	2	5	3	2	1	1	0	0	0	0	200	2.5	3	2	1
23	Quintana Roo	5	Benito Juárez	158	Alicia	865912	210536	10	4	*	*	*	*	*	*	*	*	*	*	*	*	*	*	*	*	*	*	*	*	*	*	*	*	*	*	*	*	*	*	*	*	*	*	*	*	*	*	*	*
23	Quintana Roo	5	Benito Juárez	160	Los Olmos	865845	210557	10	2	*	*	*	*	*	*	*	*	*	*	*	*	*	*	*	*	*	*	*	*	*	*	*	*	*	*	*	*	*	*	*	*	*	*	*	*	*	*	*	*
23	Quintana Roo	5	Benito Juárez	162	Rodmen	865202	205715	5	2	*	*	*	*	*	*	*	*	*	*	*	*	*	*	*	*	*	*	*	*	*	*	*	*	*	*	*	*	*	*	*	*	*	*	*	*	*	*	*	*
23	Quintana Roo	5	Benito Juárez	163	La Santa Cruz	870519	211116	10	1	*	*	*	*	*	*	*	*	*	*	*	*	*	*	*	*	*	*	*	*	*	*	*	*	*	*	*	*	*	*	*	*	*	*	*	*	*	*	*	*
23	Quintana Roo	5	Benito Juárez	166	San Salvador	865702	210636	10	3	*	*	*	*	*	*	*	*	*	*	*	*	*	*	*	*	*	*	*	*	*	*	*	*	*	*	*	*	*	*	*	*	*	*	*	*	*	*	*	*
23	Quintana Roo	5	Benito Juárez	167	San Miguel	865135	205843	5	2	*	*	*	*	*	*	*	*	*	*	*	*	*	*	*	*	*	*	*	*	*	*	*	*	*	*	*	*	*	*	*	*	*	*	*	*	*	*	*	*
23	Quintana Roo	5	Benito Juárez	173	San Antonio	870135	211037	10	7	*	*	*	*	*	*	*	*	*	*	*	*	*	*	*	*	*	*	*	*	*	*	*	*	*	*	*	*	*	*	*	*	*	*	*	*	*	*	*	*
23	Quintana Roo	5	Benito Juárez	181	La Aurora	870053	210441	10	1	*	*	*	*	*	*	*	*	*	*	*	*	*	*	*	*	*	*	*	*	*	*	*	*	*	*	*	*	*	*	*	*	*	*	*	*	*	*	*	*
23	Quintana Roo	5	Benito Juárez	183	El Tucán	870418	211040	10	2	*	*	*	*	*	*	*	*	*	*	*	*	*	*	*	*	*	*	*	*	*	*	*	*	*	*	*	*	*	*	*	*	*	*	*	*	*	*	*	*
23	Quintana Roo	5	Benito Juárez	184	Los Vargas	870525	211004	10	2	*	*	*	*	*	*	*	*	*	*	*	*	*	*	*	*	*	*	*	*	*	*	*	*	*	*	*	*	*	*	*	*	*	*	*	*	*	*	*	*
23	Quintana Roo	5	Benito Juárez	186	Villa de Guadalupe	870221	211042	10	4	*	*	*	*	*	*	*	*	*	*	*	*	*	*	*	*	*	*	*	*	*	*	*	*	*	*	*	*	*	*	*	*	*	*	*	*	*	*	*	*
23	Quintana Roo	5	Benito Juárez	187	Villas de Cancún	865547	210719	10	13	7	6	2	1	1	2	1	1	0	7	4	3	0	0	0	0	0	7	7	4	3	1	3	6	3	3	7	4	3	1	1	0	0	0	0	116.67	2.67	0	7	4
23	Quintana Roo	5	Benito Juárez	188	Villas Miramar	864820	211144	5	42	21	21	0	0	0	2	2	0	0	19	9	10	0	2	2	0	2	19	17	7	10	5	8	14	5	9	15	7	8	3	2	1	1	1	0	100	1.3	17	2	1
23	Quintana Roo	5	Benito Juárez	189	Xokipix	865030	205529	5	4	*	*	*	*	*	*	*	*	*	*	*	*	*	*	*	*	*	*	*	*	*	*	*	*	*	*	*	*	*	*	*	*	*	*	*	*	*	*	*	*
23	Quintana Roo	5	Benito Juárez	200	Carolina	865526	210724	10	2	*	*	*	*	*	*	*	*	*	*	*	*	*	*	*	*	*	*	*	*	*	*	*	*	*	*	*	*	*	*	*	*	*	*	*	*	*	*	*	*
23	Quintana Roo	5	Benito Juárez	201	Kilómetro Trescientos Tres	865738	210623	10	1	*	*	*	*	*	*	*	*	*	*	*	*	*	*	*	*	*	*	*	*	*	*	*	*	*	*	*	*	*	*	*	*	*	*	*	*	*	*	*	*
23	Quintana Roo	5	Benito Juárez	202	Las Arboledas	865631	210713	10	70	40	30	2	2	0	14	10	4	0	41	25	16	9	12	8	4	3	32	29	17	12	8	9	27	16	11	28	16	12	2	1	1	2	1	1	133.33	2.62	37	4	4
23	Quintana Roo	5	Benito Juárez	203	San Pedro	865710	210636	10	3	*	*	*	*	*	*	*	*	*	*	*	*	*	*	*	*	*	*	*	*	*	*	*	*	*	*	*	*	*	*	*	*	*	*	*	*	*	*	*	*
23	Quintana Roo	5	Benito Juárez	204	Corralón Federal	865717	210626	10	1	*	*	*	*	*	*	*	*	*	*	*	*	*	*	*	*	*	*	*	*	*	*	*	*	*	*	*	*	*	*	*	*	*	*	*	*	*	*	*	*
23	Quintana Roo	5	Benito Juárez	207	Huertos del Ramonal	865759	210633	10	8	*	*	*	*	*	*	*	*	*	*	*	*	*	*	*	*	*	*	*	*	*	*	*	*	*	*	*	*	*	*	*	*	*	*	*	*	*	*	*	*
23	Quintana Roo	5	Benito Juárez	208	Morales	865515	210730	10	4	*	*	*	*	*	*	*	*	*	*	*	*	*	*	*	*	*	*	*	*	*	*	*	*	*	*	*	*	*	*	*	*	*	*	*	*	*	*	*	*
23	Quintana Roo	5	Benito Juárez	210	Estrellas de la Noche (Kilómetro Veintiuno)	865819	210602	10	7	*	*	*	*	*	*	*	*	*	*	*	*	*	*	*	*	*	*	*	*	*	*	*	*	*	*	*	*	*	*	*	*	*	*	*	*	*	*	*	*
23	Quintana Roo	5	Benito Juárez	212	San Antonio	865818	210556	10	4	*	*	*	*	*	*	*	*	*	*	*	*	*	*	*	*	*	*	*	*	*	*	*	*	*	*	*	*	*	*	*	*	*	*	*	*	*	*	*	*
23	Quintana Roo	5	Benito Juárez	213	Flor de Cancún	865905	210534	10	3	*	*	*	*	*	*	*	*	*	*	*	*	*	*	*	*	*	*	*	*	*	*	*	*	*	*	*	*	*	*	*	*	*	*	*	*	*	*	*	*
23	Quintana Roo	5	Benito Juárez	219	Localidad sin Nombre	865506	210738	10	2	*	*	*	*	*	*	*	*	*	*	*	*	*	*	*	*	*	*	*	*	*	*	*	*	*	*	*	*	*	*	*	*	*	*	*	*	*	*	*	*
23	Quintana Roo	5	Benito Juárez	223	Los Almendros	865538	210718	10	5	*	*	*	*	*	*	*	*	*	*	*	*	*	*	*	*	*	*	*	*	*	*	*	*	*	*	*	*	*	*	*	*	*	*	*	*	*	*	*	*
23	Quintana Roo	5	Benito Juárez	225	Avante	865623	210651	10	1384	743	641	171	96	75	528	289	239	48	1121	601	520	211	309	169	140	98	862	764	408	356	213	308	713	377	336	682	363	319	51	31	20	26	19	7	115.91	2.65	783	333	185
23	Quintana Roo	5	Benito Juárez	226	Nojoch Xunan	870339	210323	10	2	*	*	*	*	*	*	*	*	*	*	*	*	*	*	*	*	*	*	*	*	*	*	*	*	*	*	*	*	*	*	*	*	*	*	*	*	*	*	*	*
23	Quintana Roo	5	Benito Juárez	227	Chile Parado	870002	210505	10	5	*	*	*	*	*	*	*	*	*	*	*	*	*	*	*	*	*	*	*	*	*	*	*	*	*	*	*	*	*	*	*	*	*	*	*	*	*	*	*	*
23	Quintana Roo	5	Benito Juárez	229	San José (La Gota de Oro)	865944	210516	10	6	*	*	*	*	*	*	*	*	*	*	*	*	*	*	*	*	*	*	*	*	*	*	*	*	*	*	*	*	*	*	*	*	*	*	*	*	*	*	*	*
23	Quintana Roo	5	Benito Juárez	234	Los Dos Hermanos J y J	865944	210519	10	8	*	*	*	*	*	*	*	*	*	*	*	*	*	*	*	*	*	*	*	*	*	*	*	*	*	*	*	*	*	*	*	*	*	*	*	*	*	*	*	*
23	Quintana Roo	5	Benito Juárez	235	Central Hidalgo	870225	210351	10	1	*	*	*	*	*	*	*	*	*	*	*	*	*	*	*	*	*	*	*	*	*	*	*	*	*	*	*	*	*	*	*	*	*	*	*	*	*	*	*	*
23	Quintana Roo	5	Benito Juárez	236	Las Pollitas	870315	210334	10	3	*	*	*	*	*	*	*	*	*	*	*	*	*	*	*	*	*	*	*	*	*	*	*	*	*	*	*	*	*	*	*	*	*	*	*	*	*	*	*	*
23	Quintana Roo	5	Benito Juárez	237	Bosques del Caribe	865825	210626	10	6	*	*	*	*	*	*	*	*	*	*	*	*	*	*	*	*	*	*	*	*	*	*	*	*	*	*	*	*	*	*	*	*	*	*	*	*	*	*	*	*
23	Quintana Roo	5	Benito Juárez	240	El Candado	865510	210733	10	5	*	*	*	*	*	*	*	*	*	*	*	*	*	*	*	*	*	*	*	*	*	*	*	*	*	*	*	*	*	*	*	*	*	*	*	*	*	*	*	*
23	Quintana Roo	5	Benito Juárez	243	Avance Agroindustrial	865935	210520	10	7	*	*	*	*	*	*	*	*	*	*	*	*	*	*	*	*	*	*	*	*	*	*	*	*	*	*	*	*	*	*	*	*	*	*	*	*	*	*	*	*
23	Quintana Roo	5	Benito Juárez	244	La Teresita	865943	210520	10	12	5	7	0	0	0	1	0	1	0	12	5	7	1	1	0	1	0	11	11	5	6	3	5	11	5	6	10	5	5	0	0	0	0	0	0	71.43	2.4	12	0	0
23	Quintana Roo	5	Benito Juárez	245	San Antonio	865931	210526	10	4	*	*	*	*	*	*	*	*	*	*	*	*	*	*	*	*	*	*	*	*	*	*	*	*	*	*	*	*	*	*	*	*	*	*	*	*	*	*	*	*
23	Quintana Roo	5	Benito Juárez	253	Colonia ABC	865415	210758	10	154	85	69	19	11	8	52	29	23	5	131	72	59	14	28	16	12	14	112	98	54	44	44	41	94	52	42	83	46	37	4	2	2	2	1	1	123.19	2.98	121	10	6
23	Quintana Roo	5	Benito Juárez	254	Don Víctor	865511	210732	10	4	*	*	*	*	*	*	*	*	*	*	*	*	*	*	*	*	*	*	*	*	*	*	*	*	*	*	*	*	*	*	*	*	*	*	*	*	*	*	*	*
23	Quintana Roo	5	Benito Juárez	260	Los Tres Reyes	865634	210624	10	2377	1250	1127	327	167	160	907	470	437	74	1970	1041	929	346	506	263	243	160	1550	1390	738	652	434	562	1311	692	619	1260	662	598	79	46	33	42	22	20	110.91	2.7	1551	414	215
23	Quintana Roo	5	Benito Juárez	261	Benito Juárez	870051	210446	10	1	*	*	*	*	*	*	*	*	*	*	*	*	*	*	*	*	*	*	*	*	*	*	*	*	*	*	*	*	*	*	*	*	*	*	*	*	*	*	*	*
23	Quintana Roo	5	Benito Juárez	263	Carabanchel	865458	210814	10	47	24	23	7	2	5	18	6	12	1	35	19	16	10	10	3	7	0	24	24	15	9	3	7	22	14	8	24	15	9	2	1	1	2	1	1	104.35	3.33	28	7	2
23	Quintana Roo	5	Benito Juárez	266	Desarrollos Inmobiliarios Residenciales	865006	210710	10	5	*	*	*	*	*	*	*	*	*	*	*	*	*	*	*	*	*	*	*	*	*	*	*	*	*	*	*	*	*	*	*	*	*	*	*	*	*	*	*	*
23	Quintana Roo	5	Benito Juárez	267	José Antonio Murillo Hernández	865009	210708	10	18	*	*	*	*	*	*	*	*	*	*	*	*	*	*	*	*	*	*	*	*	*	*	*	*	*	*	*	*	*	*	*	*	*	*	*	*	*	*	*	*
23	Quintana Roo	5	Benito Juárez	274	Kilómetro Nueve	865028	210529	10	14	6	8	2	0	2	4	2	2	0	12	6	6	0	2	2	0	2	12	10	4	6	4	6	10	4	6	8	4	4	0	0	0	0	0	0	75	1.67	12	0	0
23	Quintana Roo	5	Benito Juárez	283	Luis Donaldo Colosio Murrieta	865022	210555	10	134	66	68	8	3	5	15	7	8	0	29	15	14	7	7	4	3	0	22	22	11	11	6	11	22	11	11	19	10	9	0	0	0	0	0	0	97.06	2.09	24	5	3
23	Quintana Roo	5	Benito Juárez	291	Villas de Mora	865042	210347	10	20	11	9	1	1	0	5	4	1	0	11	6	5	4	4	3	1	0	7	7	3	4	3	4	7	3	4	7	3	4	0	0	0	0	0	0	122.22	1.75	11	0	0
23	Quintana Roo	5	Benito Juárez	295	Rancho Salinas	865037	210420	10	3	*	*	*	*	*	*	*	*	*	*	*	*	*	*	*	*	*	*	*	*	*	*	*	*	*	*	*	*	*	*	*	*	*	*	*	*	*	*	*	*
23	Quintana Roo	5	Benito Juárez	299	San Carlos	865037	210427	10	4	*	*	*	*	*	*	*	*	*	*	*	*	*	*	*	*	*	*	*	*	*	*	*	*	*	*	*	*	*	*	*	*	*	*	*	*	*	*	*	*
23	Quintana Roo	5	Benito Juárez	315	Subestación Nizuc	865049	210400	10	1	*	*	*	*	*	*	*	*	*	*	*	*	*	*	*	*	*	*	*	*	*	*	*	*	*	*	*	*	*	*	*	*	*	*	*	*	*	*	*	*
23	Quintana Roo	5	Benito Juárez	318	Pedro Marrufo Silva (Lienzo Charro)	865058	210216	10	2	*	*	*	*	*	*	*	*	*	*	*	*	*	*	*	*	*	*	*	*	*	*	*	*	*	*	*	*	*	*	*	*	*	*	*	*	*	*	*	*
23	Quintana Roo	5	Benito Juárez	321	UAIM	871056	205940	10	4	*	*	*	*	*	*	*	*	*	*	*	*	*	*	*	*	*	*	*	*	*	*	*	*	*	*	*	*	*	*	*	*	*	*	*	*	*	*	*	*
23	Quintana Roo	5	Benito Juárez	322	Vivero Forestal Leona Vicario	870958	210007	10	1	*	*	*	*	*	*	*	*	*	*	*	*	*	*	*	*	*	*	*	*	*	*	*	*	*	*	*	*	*	*	*	*	*	*	*	*	*	*	*	*
23	Quintana Roo	5	Benito Juárez	323	Bloquera Leona Vicario	870641	210151	10	6	*	*	*	*	*	*	*	*	*	*	*	*	*	*	*	*	*	*	*	*	*	*	*	*	*	*	*	*	*	*	*	*	*	*	*	*	*	*	*	*
23	Quintana Roo	5	Benito Juárez	332	Playa Sur	865150	205302	5	5	*	*	*	*	*	*	*	*	*	*	*	*	*	*	*	*	*	*	*	*	*	*	*	*	*	*	*	*	*	*	*	*	*	*	*	*	*	*	*	*
23	Quintana Roo	5	Benito Juárez	343	Balam	870519	211129	10	1	*	*	*	*	*	*	*	*	*	*	*	*	*	*	*	*	*	*	*	*	*	*	*	*	*	*	*	*	*	*	*	*	*	*	*	*	*	*	*	*
23	Quintana Roo	5	Benito Juárez	351	El Pedregal	870237	211042	10	1	*	*	*	*	*	*	*	*	*	*	*	*	*	*	*	*	*	*	*	*	*	*	*	*	*	*	*	*	*	*	*	*	*	*	*	*	*	*	*	*
23	Quintana Roo	5	Benito Juárez	353	Montalayos	870518	211159	10	4	*	*	*	*	*	*	*	*	*	*	*	*	*	*	*	*	*	*	*	*	*	*	*	*	*	*	*	*	*	*	*	*	*	*	*	*	*	*	*	*
23	Quintana Roo	5	Benito Juárez	354	El Jabalí	870518	211155	10	7	*	*	*	*	*	*	*	*	*	*	*	*	*	*	*	*	*	*	*	*	*	*	*	*	*	*	*	*	*	*	*	*	*	*	*	*	*	*	*	*
23	Quintana Roo	5	Benito Juárez	357	El Ana Bárbara	870518	211203	10	3	*	*	*	*	*	*	*	*	*	*	*	*	*	*	*	*	*	*	*	*	*	*	*	*	*	*	*	*	*	*	*	*	*	*	*	*	*	*	*	*
23	Quintana Roo	5	Benito Juárez	365	Localidad sin Nombre	870214	211041	10	4	*	*	*	*	*	*	*	*	*	*	*	*	*	*	*	*	*	*	*	*	*	*	*	*	*	*	*	*	*	*	*	*	*	*	*	*	*	*	*	*
23	Quintana Roo	5	Benito Juárez	369	San Carlos	870154	211036	10	1	*	*	*	*	*	*	*	*	*	*	*	*	*	*	*	*	*	*	*	*	*	*	*	*	*	*	*	*	*	*	*	*	*	*	*	*	*	*	*	*
23	Quintana Roo	5	Benito Juárez	376	Los Girasoles	870519	210658	10	4	*	*	*	*	*	*	*	*	*	*	*	*	*	*	*	*	*	*	*	*	*	*	*	*	*	*	*	*	*	*	*	*	*	*	*	*	*	*	*	*
23	Quintana Roo	5	Benito Juárez	409	El Rodeo de la Noche	865443	210746	10	94	*	*	*	*	*	*	*	*	*	*	*	*	*	*	*	*	*	*	*	*	*	*	*	*	*	*	*	*	*	*	*	*	*	*	*	*	*	*	*	*
23	Quintana Roo	5	Benito Juárez	410	Localidad sin Nombre	865725	210625	10	9	6	3	0	0	0	2	1	1	0	9	6	3	2	2	1	1	0	7	7	5	2	1	2	7	5	2	7	5	2	0	0	0	0	0	0	200	4	9	0	0
23	Quintana Roo	5	Benito Juárez	416	El Refugio	870525	210908	10	4	*	*	*	*	*	*	*	*	*	*	*	*	*	*	*	*	*	*	*	*	*	*	*	*	*	*	*	*	*	*	*	*	*	*	*	*	*	*	*	*
23	Quintana Roo	5	Benito Juárez	431	El Esfuerzo	865434	210751	10	5	*	*	*	*	*	*	*	*	*	*	*	*	*	*	*	*	*	*	*	*	*	*	*	*	*	*	*	*	*	*	*	*	*	*	*	*	*	*	*	*
23	Quintana Roo	5	Benito Juárez	440	Divino Redentor	865940	210521	10	4	*	*	*	*	*	*	*	*	*	*	*	*	*	*	*	*	*	*	*	*	*	*	*	*	*	*	*	*	*	*	*	*	*	*	*	*	*	*	*	*
23	Quintana Roo	5	Benito Juárez	441	Localidad sin Nombre	865938	210530	10	1	*	*	*	*	*	*	*	*	*	*	*	*	*	*	*	*	*	*	*	*	*	*	*	*	*	*	*	*	*	*	*	*	*	*	*	*	*	*	*	*
23	Quintana Roo	5	Benito Juárez	442	San Eduardo	870214	205142	10	5	*	*	*	*	*	*	*	*	*	*	*	*	*	*	*	*	*	*	*	*	*	*	*	*	*	*	*	*	*	*	*	*	*	*	*	*	*	*	*	*
23	Quintana Roo	5	Benito Juárez	443	Los Sobrinos	871438	205827	10	4	*	*	*	*	*	*	*	*	*	*	*	*	*	*	*	*	*	*	*	*	*	*	*	*	*	*	*	*	*	*	*	*	*	*	*	*	*	*	*	*
23	Quintana Roo	5	Benito Juárez	447	Tres Bocas	870431	205222	10	1	*	*	*	*	*	*	*	*	*	*	*	*	*	*	*	*	*	*	*	*	*	*	*	*	*	*	*	*	*	*	*	*	*	*	*	*	*	*	*	*
23	Quintana Roo	5	Benito Juárez	452	El Niño Perdido	865604	205114	10	2	*	*	*	*	*	*	*	*	*	*	*	*	*	*	*	*	*	*	*	*	*	*	*	*	*	*	*	*	*	*	*	*	*	*	*	*	*	*	*	*
23	Quintana Roo	5	Benito Juárez	453	Rancho Alegre	870436	205201	10	1	*	*	*	*	*	*	*	*	*	*	*	*	*	*	*	*	*	*	*	*	*	*	*	*	*	*	*	*	*	*	*	*	*	*	*	*	*	*	*	*
23	Quintana Roo	5	Benito Juárez	455	San Isidro	865729	210623	10	8	*	*	*	*	*	*	*	*	*	*	*	*	*	*	*	*	*	*	*	*	*	*	*	*	*	*	*	*	*	*	*	*	*	*	*	*	*	*	*	*
23	Quintana Roo	5	Benito Juárez	457	Ejido Isla Mujeres	865012	211214	5	9	*	*	*	*	*	*	*	*	*	*	*	*	*	*	*	*	*	*	*	*	*	*	*	*	*	*	*	*	*	*	*	*	*	*	*	*	*	*	*	*
23	Quintana Roo	5	Benito Juárez	458	María Isabel Landero	865425	210755	10	13	*	*	*	*	*	*	*	*	*	*	*	*	*	*	*	*	*	*	*	*	*	*	*	*	*	*	*	*	*	*	*	*	*	*	*	*	*	*	*	*
23	Quintana Roo	5	Benito Juárez	462	Avicún	865811	210601	10	4	*	*	*	*	*	*	*	*	*	*	*	*	*	*	*	*	*	*	*	*	*	*	*	*	*	*	*	*	*	*	*	*	*	*	*	*	*	*	*	*
23	Quintana Roo	5	Benito Juárez	464	Las Auracarias	865019	210625	10	30	15	15	7	3	4	10	5	5	0	19	10	9	3	3	2	1	0	16	16	8	8	6	8	16	8	8	15	8	7	0	0	0	0	0	0	100	1.5	15	4	3
23	Quintana Roo	5	Benito Juárez	470	Lol Kaax	870517	210915	10	4	*	*	*	*	*	*	*	*	*	*	*	*	*	*	*	*	*	*	*	*	*	*	*	*	*	*	*	*	*	*	*	*	*	*	*	*	*	*	*	*
23	Quintana Roo	5	Benito Juárez	472	Hermanos Estrada	865846	210544	10	13	*	*	*	*	*	*	*	*	*	*	*	*	*	*	*	*	*	*	*	*	*	*	*	*	*	*	*	*	*	*	*	*	*	*	*	*	*	*	*	*
23	Quintana Roo	5	Benito Juárez	477	Cárcamo Ocho	870346	210319	10	2	*	*	*	*	*	*	*	*	*	*	*	*	*	*	*	*	*	*	*	*	*	*	*	*	*	*	*	*	*	*	*	*	*	*	*	*	*	*	*	*
23	Quintana Roo	5	Benito Juárez	485	La Chaya	870704	210641	10	3	*	*	*	*	*	*	*	*	*	*	*	*	*	*	*	*	*	*	*	*	*	*	*	*	*	*	*	*	*	*	*	*	*	*	*	*	*	*	*	*
23	Quintana Roo	5	Benito Juárez	491	Víctor Encalada (La Laguna)	871629	205742	15	4	*	*	*	*	*	*	*	*	*	*	*	*	*	*	*	*	*	*	*	*	*	*	*	*	*	*	*	*	*	*	*	*	*	*	*	*	*	*	*	*
23	Quintana Roo	5	Benito Juárez	492	Emiliano Zapata	870313	210412	10	49	28	21	14	8	6	20	12	8	1	35	20	15	5	5	3	2	0	29	29	16	13	7	9	26	14	12	29	16	13	3	2	1	1	1	0	133.33	4.23	31	4	3
23	Quintana Roo	5	Benito Juárez	497	Flamingos Plus	864819	211152	5	66	32	34	9	6	3	17	11	6	1	49	22	27	4	7	5	2	3	44	41	17	24	5	22	38	15	23	39	17	22	3	2	1	2	2	0	94.12	1.33	35	14	5
23	Quintana Roo	5	Benito Juárez	498	Villas Magna Residencial	865028	210610	10	156	73	83	5	1	4	18	7	11	1	54	23	31	10	12	6	6	2	43	41	17	24	10	23	41	17	24	36	16	20	0	0	0	0	0	0	87.95	1.08	33	19	4
23	Quintana Roo	5	Benito Juárez	503	La Guadalupana	870003	210511	10	4	*	*	*	*	*	*	*	*	*	*	*	*	*	*	*	*	*	*	*	*	*	*	*	*	*	*	*	*	*	*	*	*	*	*	*	*	*	*	*	*
23	Quintana Roo	5	Benito Juárez	505	La Guadalupana	865027	211208	61	22	11	11	2	2	0	8	5	3	0	20	9	11	3	6	3	3	3	17	14	6	8	1	5	12	6	6	14	6	8	2	0	2	2	0	2	100	3.11	20	0	0
23	Quintana Roo	5	Benito Juárez	506	San Jacinto	865814	210559	10	7	*	*	*	*	*	*	*	*	*	*	*	*	*	*	*	*	*	*	*	*	*	*	*	*	*	*	*	*	*	*	*	*	*	*	*	*	*	*	*	*
23	Quintana Roo	5	Benito Juárez	507	La Guadalupe	865023	211211	10	12	*	*	*	*	*	*	*	*	*	*	*	*	*	*	*	*	*	*	*	*	*	*	*	*	*	*	*	*	*	*	*	*	*	*	*	*	*	*	*	*
23	Quintana Roo	5	Benito Juárez	509	Hermanos Martínez	870042	210446	10	5	*	*	*	*	*	*	*	*	*	*	*	*	*	*	*	*	*	*	*	*	*	*	*	*	*	*	*	*	*	*	*	*	*	*	*	*	*	*	*	*
23	Quintana Roo	5	Benito Juárez	512	Hopelchén	864819	211158	5	94	46	48	0	0	0	0	0	0	0	11	5	6	0	0	0	0	0	11	11	5	6	1	4	9	4	5	11	5	6	2	1	1	2	1	1	95.83	0.33	11	0	0
23	Quintana Roo	5	Benito Juárez	516	Doña Marina	870020	210457	10	7	*	*	*	*	*	*	*	*	*	*	*	*	*	*	*	*	*	*	*	*	*	*	*	*	*	*	*	*	*	*	*	*	*	*	*	*	*	*	*	*
23	Quintana Roo	5	Benito Juárez	517	Trituradora de Cancún	870010	210507	10	2	*	*	*	*	*	*	*	*	*	*	*	*	*	*	*	*	*	*	*	*	*	*	*	*	*	*	*	*	*	*	*	*	*	*	*	*	*	*	*	*
23	Quintana Roo	5	Benito Juárez	518	Jorge Millet	865946	210518	10	3	*	*	*	*	*	*	*	*	*	*	*	*	*	*	*	*	*	*	*	*	*	*	*	*	*	*	*	*	*	*	*	*	*	*	*	*	*	*	*	*
23	Quintana Roo	5	Benito Juárez	520	Ricardo Fernández	865917	210533	10	3	*	*	*	*	*	*	*	*	*	*	*	*	*	*	*	*	*	*	*	*	*	*	*	*	*	*	*	*	*	*	*	*	*	*	*	*	*	*	*	*
23	Quintana Roo	5	Benito Juárez	521	Víctor Jiménez	865849	210542	10	4	*	*	*	*	*	*	*	*	*	*	*	*	*	*	*	*	*	*	*	*	*	*	*	*	*	*	*	*	*	*	*	*	*	*	*	*	*	*	*	*
23	Quintana Roo	5	Benito Juárez	522	El Ramonal	865842	210546	10	12	7	5	1	1	0	3	2	1	0	11	6	5	1	2	1	1	1	10	9	5	4	4	3	9	5	4	8	4	4	0	0	0	0	0	0	140	1.5	5	6	3
23	Quintana Roo	5	Benito Juárez	524	Cesáreo Hernández Lorza	865836	210549	10	5	*	*	*	*	*	*	*	*	*	*	*	*	*	*	*	*	*	*	*	*	*	*	*	*	*	*	*	*	*	*	*	*	*	*	*	*	*	*	*	*
23	Quintana Roo	5	Benito Juárez	526	Andrés Ancona	865429	210753	10	7	*	*	*	*	*	*	*	*	*	*	*	*	*	*	*	*	*	*	*	*	*	*	*	*	*	*	*	*	*	*	*	*	*	*	*	*	*	*	*	*
23	Quintana Roo	5	Benito Juárez	532	Victoria	865036	210434	10	10	*	*	*	*	*	*	*	*	*	*	*	*	*	*	*	*	*	*	*	*	*	*	*	*	*	*	*	*	*	*	*	*	*	*	*	*	*	*	*	*
23	Quintana Roo	5	Benito Juárez	533	Localidad sin Nombre	865034	210443	10	6	*	*	*	*	*	*	*	*	*	*	*	*	*	*	*	*	*	*	*	*	*	*	*	*	*	*	*	*	*	*	*	*	*	*	*	*	*	*	*	*
23	Quintana Roo	5	Benito Juárez	534	Villa de Guadalupe	870634	211256	10	4	*	*	*	*	*	*	*	*	*	*	*	*	*	*	*	*	*	*	*	*	*	*	*	*	*	*	*	*	*	*	*	*	*	*	*	*	*	*	*	*
23	Quintana Roo	5	Benito Juárez	535	La Virtud	870525	210932	10	2	*	*	*	*	*	*	*	*	*	*	*	*	*	*	*	*	*	*	*	*	*	*	*	*	*	*	*	*	*	*	*	*	*	*	*	*	*	*	*	*
23	Quintana Roo	5	Benito Juárez	536	La Providencia	870525	211042	10	4	*	*	*	*	*	*	*	*	*	*	*	*	*	*	*	*	*	*	*	*	*	*	*	*	*	*	*	*	*	*	*	*	*	*	*	*	*	*	*	*
23	Quintana Roo	5	Benito Juárez	538	Eva y Kurt	865032	210446	10	4	*	*	*	*	*	*	*	*	*	*	*	*	*	*	*	*	*	*	*	*	*	*	*	*	*	*	*	*	*	*	*	*	*	*	*	*	*	*	*	*
23	Quintana Roo	5	Benito Juárez	540	San Miguel	870518	211208	10	4	*	*	*	*	*	*	*	*	*	*	*	*	*	*	*	*	*	*	*	*	*	*	*	*	*	*	*	*	*	*	*	*	*	*	*	*	*	*	*	*
23	Quintana Roo	5	Benito Juárez	544	Localidad sin Nombre	870231	211042	10	4	*	*	*	*	*	*	*	*	*	*	*	*	*	*	*	*	*	*	*	*	*	*	*	*	*	*	*	*	*	*	*	*	*	*	*	*	*	*	*	*
23	Quintana Roo	5	Benito Juárez	547	Localidad sin Nombre	871654	205737	10	4	*	*	*	*	*	*	*	*	*	*	*	*	*	*	*	*	*	*	*	*	*	*	*	*	*	*	*	*	*	*	*	*	*	*	*	*	*	*	*	*
23	Quintana Roo	5	Benito Juárez	549	Localidad sin Nombre	870047	205809	5	1	*	*	*	*	*	*	*	*	*	*	*	*	*	*	*	*	*	*	*	*	*	*	*	*	*	*	*	*	*	*	*	*	*	*	*	*	*	*	*	*
23	Quintana Roo	5	Benito Juárez	552	Rincón del Ángel	865141	205744	5	7	*	*	*	*	*	*	*	*	*	*	*	*	*	*	*	*	*	*	*	*	*	*	*	*	*	*	*	*	*	*	*	*	*	*	*	*	*	*	*	*
23	Quintana Roo	5	Benito Juárez	556	La Querencia	865142	205321	10	4	*	*	*	*	*	*	*	*	*	*	*	*	*	*	*	*	*	*	*	*	*	*	*	*	*	*	*	*	*	*	*	*	*	*	*	*	*	*	*	*
23	Quintana Roo	5	Benito Juárez	559	San Joaquín	870157	205141	5	3	*	*	*	*	*	*	*	*	*	*	*	*	*	*	*	*	*	*	*	*	*	*	*	*	*	*	*	*	*	*	*	*	*	*	*	*	*	*	*	*
23	Quintana Roo	5	Benito Juárez	564	Buenaventura	870357	211040	10	6	*	*	*	*	*	*	*	*	*	*	*	*	*	*	*	*	*	*	*	*	*	*	*	*	*	*	*	*	*	*	*	*	*	*	*	*	*	*	*	*
23	Quintana Roo	5	Benito Juárez	565	Rancho Alegre	870351	211045	10	1	*	*	*	*	*	*	*	*	*	*	*	*	*	*	*	*	*	*	*	*	*	*	*	*	*	*	*	*	*	*	*	*	*	*	*	*	*	*	*	*
23	Quintana Roo	5	Benito Juárez	568	Isidro Rejón	865029	211212	10	4	*	*	*	*	*	*	*	*	*	*	*	*	*	*	*	*	*	*	*	*	*	*	*	*	*	*	*	*	*	*	*	*	*	*	*	*	*	*	*	*
23	Quintana Roo	5	Benito Juárez	577	Kukulkán (Kilómetro Siete)	870527	210619	10	3	*	*	*	*	*	*	*	*	*	*	*	*	*	*	*	*	*	*	*	*	*	*	*	*	*	*	*	*	*	*	*	*	*	*	*	*	*	*	*	*
23	Quintana Roo	5	Benito Juárez	580	El Rancho Grande	865528	204903	10	12	*	*	*	*	*	*	*	*	*	*	*	*	*	*	*	*	*	*	*	*	*	*	*	*	*	*	*	*	*	*	*	*	*	*	*	*	*	*	*	*
23	Quintana Roo	5	Benito Juárez	582	El Sauce y la Palma	870520	211005	10	12	*	*	*	*	*	*	*	*	*	*	*	*	*	*	*	*	*	*	*	*	*	*	*	*	*	*	*	*	*	*	*	*	*	*	*	*	*	*	*	*
23	Quintana Roo	5	Benito Juárez	586	Los Menchis	870520	210825	10	3	*	*	*	*	*	*	*	*	*	*	*	*	*	*	*	*	*	*	*	*	*	*	*	*	*	*	*	*	*	*	*	*	*	*	*	*	*	*	*	*
23	Quintana Roo	5	Benito Juárez	587	Doble C	865935	210524	10	2	*	*	*	*	*	*	*	*	*	*	*	*	*	*	*	*	*	*	*	*	*	*	*	*	*	*	*	*	*	*	*	*	*	*	*	*	*	*	*	*
23	Quintana Roo	5	Benito Juárez	589	Mituch	870504	211041	10	4	*	*	*	*	*	*	*	*	*	*	*	*	*	*	*	*	*	*	*	*	*	*	*	*	*	*	*	*	*	*	*	*	*	*	*	*	*	*	*	*
23	Quintana Roo	5	Benito Juárez	591	Rancho Cactus	870843	210045	10	5	*	*	*	*	*	*	*	*	*	*	*	*	*	*	*	*	*	*	*	*	*	*	*	*	*	*	*	*	*	*	*	*	*	*	*	*	*	*	*	*
23	Quintana Roo	5	Benito Juárez	592	Zona Suburbana de Puerto Morelos	865439	205137	5	108	60	48	2	1	1	8	5	3	0	48	30	18	5	6	4	2	1	43	42	26	16	9	12	38	24	14	40	25	15	4	2	2	3	1	2	125	2	32	15	11
23	Quintana Roo	5	Benito Juárez	596	El Pájaro Loco	865622	205120	5	2	*	*	*	*	*	*	*	*	*	*	*	*	*	*	*	*	*	*	*	*	*	*	*	*	*	*	*	*	*	*	*	*	*	*	*	*	*	*	*	*
23	Quintana Roo	5	Benito Juárez	597	Las Palmas	870525	210940	10	5	*	*	*	*	*	*	*	*	*	*	*	*	*	*	*	*	*	*	*	*	*	*	*	*	*	*	*	*	*	*	*	*	*	*	*	*	*	*	*	*
23	Quintana Roo	5	Benito Juárez	598	Las Palmas	865032	211229	10	8	3	5	1	0	1	2	0	2	0	7	3	4	0	1	0	1	1	7	6	3	3	4	3	6	3	3	5	3	2	0	0	0	0	0	0	60	1.75	7	0	0
23	Quintana Roo	5	Benito Juárez	602	Las Pencas	865618	210657	10	299	155	144	39	21	18	90	50	40	8	190	99	91	34	43	25	18	9	148	139	70	69	52	61	133	67	66	126	64	62	6	3	3	5	3	2	107.64	2.49	167	22	13
23	Quintana Roo	5	Benito Juárez	604	Tlalmanalli	865451	210742	10	11	*	*	*	*	*	*	*	*	*	*	*	*	*	*	*	*	*	*	*	*	*	*	*	*	*	*	*	*	*	*	*	*	*	*	*	*	*	*	*	*
23	Quintana Roo	5	Benito Juárez	605	Las Perlas	870526	210830	10	4	*	*	*	*	*	*	*	*	*	*	*	*	*	*	*	*	*	*	*	*	*	*	*	*	*	*	*	*	*	*	*	*	*	*	*	*	*	*	*	*
23	Quintana Roo	5	Benito Juárez	607	Punta Petempich	865050	205427	5	2	*	*	*	*	*	*	*	*	*	*	*	*	*	*	*	*	*	*	*	*	*	*	*	*	*	*	*	*	*	*	*	*	*	*	*	*	*	*	*	*
23	Quintana Roo	5	Benito Juárez	609	Playa Blanca	864825	211132	5	311	151	160	12	3	9	30	10	20	1	124	60	64	13	17	6	11	4	110	106	53	53	13	38	87	43	44	101	51	50	19	10	9	15	8	7	94.38	1.49	96	10	4
23	Quintana Roo	5	Benito Juárez	613	Punta Brava	865441	204852	5	6	6	0	0	0	0	0	0	0	0	6	6	0	0	0	0	0	0	6	6	6	0	1	0	6	6	0	6	6	0	0	0	0	0	0	0	*	*	4	2	2
23	Quintana Roo	5	Benito Juárez	616	Quintas del Mar	864819	211141	5	60	29	31	0	0	0	0	0	0	0	14	6	8	0	0	0	0	0	14	14	6	8	3	3	12	5	7	14	6	8	2	1	1	1	0	1	93.55	1.25	10	2	1
23	Quintana Roo	5	Benito Juárez	619	Rancho del Carmen	870323	210331	10	5	*	*	*	*	*	*	*	*	*	*	*	*	*	*	*	*	*	*	*	*	*	*	*	*	*	*	*	*	*	*	*	*	*	*	*	*	*	*	*	*
23	Quintana Roo	5	Benito Juárez	620	Vivero del Municipio	865433	210755	10	4	*	*	*	*	*	*	*	*	*	*	*	*	*	*	*	*	*	*	*	*	*	*	*	*	*	*	*	*	*	*	*	*	*	*	*	*	*	*	*	*
23	Quintana Roo	5	Benito Juárez	623	Real Hacienda	864819	211147	5	27	14	13	1	1	0	2	2	0	0	14	7	7	0	1	1	0	1	14	13	6	7	1	4	9	5	4	13	6	7	4	1	3	1	1	0	107.69	0.71	11	1	1
23	Quintana Roo	5	Benito Juárez	625	Rey Jesús	865033	211233	10	433	226	207	38	19	19	103	53	50	9	233	126	107	40	56	29	27	16	184	168	92	76	45	71	165	90	75	155	87	68	3	2	1	1	0	1	109.18	2.4	195	34	19
23	Quintana Roo	5	Benito Juárez	627	Los Reyes	865034	211220	10	928	474	454	102	53	49	289	149	140	25	634	323	311	113	162	80	82	49	496	447	227	220	136	202	437	224	213	405	205	200	10	3	7	5	2	3	104.41	2.17	565	61	31
23	Quintana Roo	5	Benito Juárez	629	Riclaris	870356	211045	10	4	*	*	*	*	*	*	*	*	*	*	*	*	*	*	*	*	*	*	*	*	*	*	*	*	*	*	*	*	*	*	*	*	*	*	*	*	*	*	*	*
23	Quintana Roo	5	Benito Juárez	630	Catalino Pech Can	865448	210743	10	4	*	*	*	*	*	*	*	*	*	*	*	*	*	*	*	*	*	*	*	*	*	*	*	*	*	*	*	*	*	*	*	*	*	*	*	*	*	*	*	*
23	Quintana Roo	5	Benito Juárez	647	Las Azucenas	871252	205809	10	1	*	*	*	*	*	*	*	*	*	*	*	*	*	*	*	*	*	*	*	*	*	*	*	*	*	*	*	*	*	*	*	*	*	*	*	*	*	*	*	*
23	Quintana Roo	5	Benito Juárez	648	San Juan	870520	210936	10	2	*	*	*	*	*	*	*	*	*	*	*	*	*	*	*	*	*	*	*	*	*	*	*	*	*	*	*	*	*	*	*	*	*	*	*	*	*	*	*	*
23	Quintana Roo	5	Benito Juárez	649	San Lázaro de los Trinchan	865037	211233	10	5	*	*	*	*	*	*	*	*	*	*	*	*	*	*	*	*	*	*	*	*	*	*	*	*	*	*	*	*	*	*	*	*	*	*	*	*	*	*	*	*
23	Quintana Roo	5	Benito Juárez	653	El Verde	865651	210642	10	4	*	*	*	*	*	*	*	*	*	*	*	*	*	*	*	*	*	*	*	*	*	*	*	*	*	*	*	*	*	*	*	*	*	*	*	*	*	*	*	*
23	Quintana Roo	5	Benito Juárez	655	Santa Rosa	870140	210422	10	2	*	*	*	*	*	*	*	*	*	*	*	*	*	*	*	*	*	*	*	*	*	*	*	*	*	*	*	*	*	*	*	*	*	*	*	*	*	*	*	*
23	Quintana Roo	5	Benito Juárez	656	Santa Ana (Kilómetro Doce)	870521	210859	10	3	*	*	*	*	*	*	*	*	*	*	*	*	*	*	*	*	*	*	*	*	*	*	*	*	*	*	*	*	*	*	*	*	*	*	*	*	*	*	*	*
23	Quintana Roo	5	Benito Juárez	658	Las Calandrias	870525	210951	10	4	*	*	*	*	*	*	*	*	*	*	*	*	*	*	*	*	*	*	*	*	*	*	*	*	*	*	*	*	*	*	*	*	*	*	*	*	*	*	*	*
23	Quintana Roo	5	Benito Juárez	660	Santa María	865030	211214	10	29	17	12	5	2	3	9	6	3	0	24	15	9	2	4	4	0	2	22	20	11	9	10	7	19	10	9	19	10	9	1	1	0	0	0	0	141.67	3.71	24	0	0
23	Quintana Roo	5	Benito Juárez	661	Santa Martha	865656	210639	10	1	*	*	*	*	*	*	*	*	*	*	*	*	*	*	*	*	*	*	*	*	*	*	*	*	*	*	*	*	*	*	*	*	*	*	*	*	*	*	*	*
23	Quintana Roo	5	Benito Juárez	664	SEDENA	864826	211119	5	82	45	37	9	4	5	31	19	12	4	62	35	27	13	18	13	5	5	45	40	20	20	4	18	40	20	20	38	19	19	0	0	0	0	0	0	121.62	1.95	15	47	27
23	Quintana Roo	5	Benito Juárez	668	El Sorullo	871337	205845	10	6	*	*	*	*	*	*	*	*	*	*	*	*	*	*	*	*	*	*	*	*	*	*	*	*	*	*	*	*	*	*	*	*	*	*	*	*	*	*	*	*
23	Quintana Roo	5	Benito Juárez	669	El Tajonal	870521	210816	10	4	*	*	*	*	*	*	*	*	*	*	*	*	*	*	*	*	*	*	*	*	*	*	*	*	*	*	*	*	*	*	*	*	*	*	*	*	*	*	*	*
23	Quintana Roo	5	Benito Juárez	670	Kilómetro Veintidós	865830	210551	10	4	*	*	*	*	*	*	*	*	*	*	*	*	*	*	*	*	*	*	*	*	*	*	*	*	*	*	*	*	*	*	*	*	*	*	*	*	*	*	*	*
23	Quintana Roo	5	Benito Juárez	672	Santa Lucía	870452	211045	10	4	*	*	*	*	*	*	*	*	*	*	*	*	*	*	*	*	*	*	*	*	*	*	*	*	*	*	*	*	*	*	*	*	*	*	*	*	*	*	*	*
23	Quintana Roo	5	Benito Juárez	674	Los Tres Hermanos	865036	211225	10	423	217	206	54	35	19	133	71	62	12	310	153	157	49	67	32	35	18	249	231	117	114	71	104	227	117	110	209	107	102	4	0	4	1	0	1	105.34	2.49	239	62	27
23	Quintana Roo	5	Benito Juárez	679	El Venado	870520	211001	10	4	*	*	*	*	*	*	*	*	*	*	*	*	*	*	*	*	*	*	*	*	*	*	*	*	*	*	*	*	*	*	*	*	*	*	*	*	*	*	*	*
23	Quintana Roo	5	Benito Juárez	684	Un Nuevo Horizonte	870430	211039	10	3	*	*	*	*	*	*	*	*	*	*	*	*	*	*	*	*	*	*	*	*	*	*	*	*	*	*	*	*	*	*	*	*	*	*	*	*	*	*	*	*
23	Quintana Roo	5	Benito Juárez	705	Rancho Nuevo	865334	210511	10	4	*	*	*	*	*	*	*	*	*	*	*	*	*	*	*	*	*	*	*	*	*	*	*	*	*	*	*	*	*	*	*	*	*	*	*	*	*	*	*	*
23	Quintana Roo	5	Benito Juárez	718	La Carmelita	865912	210528	10	4	*	*	*	*	*	*	*	*	*	*	*	*	*	*	*	*	*	*	*	*	*	*	*	*	*	*	*	*	*	*	*	*	*	*	*	*	*	*	*	*
23	Quintana Roo	5	Benito Juárez	723	Los Dos Hermanos	870527	210817	10	4	*	*	*	*	*	*	*	*	*	*	*	*	*	*	*	*	*	*	*	*	*	*	*	*	*	*	*	*	*	*	*	*	*	*	*	*	*	*	*	*
23	Quintana Roo	5	Benito Juárez	727	El Faisán	870149	210425	10	4	*	*	*	*	*	*	*	*	*	*	*	*	*	*	*	*	*	*	*	*	*	*	*	*	*	*	*	*	*	*	*	*	*	*	*	*	*	*	*	*
23	Quintana Roo	5	Benito Juárez	728	Fermín	871343	205842	10	4	*	*	*	*	*	*	*	*	*	*	*	*	*	*	*	*	*	*	*	*	*	*	*	*	*	*	*	*	*	*	*	*	*	*	*	*	*	*	*	*
23	Quintana Roo	5	Benito Juárez	730	Localidad sin Nombre	870525	210905	10	4	*	*	*	*	*	*	*	*	*	*	*	*	*	*	*	*	*	*	*	*	*	*	*	*	*	*	*	*	*	*	*	*	*	*	*	*	*	*	*	*
23	Quintana Roo	5	Benito Juárez	731	Las Tres Marías	870524	211121	10	4	*	*	*	*	*	*	*	*	*	*	*	*	*	*	*	*	*	*	*	*	*	*	*	*	*	*	*	*	*	*	*	*	*	*	*	*	*	*	*	*
23	Quintana Roo	5	Benito Juárez	733	Amauri	865804	210555	10	5	*	*	*	*	*	*	*	*	*	*	*	*	*	*	*	*	*	*	*	*	*	*	*	*	*	*	*	*	*	*	*	*	*	*	*	*	*	*	*	*
23	Quintana Roo	5	Benito Juárez	736	Localidad sin Nombre	865153	205254	10	3	*	*	*	*	*	*	*	*	*	*	*	*	*	*	*	*	*	*	*	*	*	*	*	*	*	*	*	*	*	*	*	*	*	*	*	*	*	*	*	*
23	Quintana Roo	5	Benito Juárez	737	Los Tres Hermanos	865501	210849	10	8	*	*	*	*	*	*	*	*	*	*	*	*	*	*	*	*	*	*	*	*	*	*	*	*	*	*	*	*	*	*	*	*	*	*	*	*	*	*	*	*
23	Quintana Roo	5	Benito Juárez	742	Garfield	870401	210311	10	2	*	*	*	*	*	*	*	*	*	*	*	*	*	*	*	*	*	*	*	*	*	*	*	*	*	*	*	*	*	*	*	*	*	*	*	*	*	*	*	*
23	Quintana Roo	5	Benito Juárez	757	San José	870452	210241	10	1	*	*	*	*	*	*	*	*	*	*	*	*	*	*	*	*	*	*	*	*	*	*	*	*	*	*	*	*	*	*	*	*	*	*	*	*	*	*	*	*
23	Quintana Roo	5	Benito Juárez	761	Valladolid Nuevo	871918	205645	10	4	*	*	*	*	*	*	*	*	*	*	*	*	*	*	*	*	*	*	*	*	*	*	*	*	*	*	*	*	*	*	*	*	*	*	*	*	*	*	*	*
23	Quintana Roo	5	Benito Juárez	766	Santa Lucía	871117	205845	10	6	*	*	*	*	*	*	*	*	*	*	*	*	*	*	*	*	*	*	*	*	*	*	*	*	*	*	*	*	*	*	*	*	*	*	*	*	*	*	*	*
23	Quintana Roo	5	Benito Juárez	769	Arrecifes	870003	210755	10	4	*	*	*	*	*	*	*	*	*	*	*	*	*	*	*	*	*	*	*	*	*	*	*	*	*	*	*	*	*	*	*	*	*	*	*	*	*	*	*	*
23	Quintana Roo	5	Benito Juárez	778	Beruco Hernández	865506	210734	10	5	*	*	*	*	*	*	*	*	*	*	*	*	*	*	*	*	*	*	*	*	*	*	*	*	*	*	*	*	*	*	*	*	*	*	*	*	*	*	*	*
23	Quintana Roo	5	Benito Juárez	779	Luz Dorada	865145	205314	10	4	*	*	*	*	*	*	*	*	*	*	*	*	*	*	*	*	*	*	*	*	*	*	*	*	*	*	*	*	*	*	*	*	*	*	*	*	*	*	*	*
23	Quintana Roo	5	Benito Juárez	784	Campestre Santa María	865628	210717	10	7	*	*	*	*	*	*	*	*	*	*	*	*	*	*	*	*	*	*	*	*	*	*	*	*	*	*	*	*	*	*	*	*	*	*	*	*	*	*	*	*
23	Quintana Roo	5	Benito Juárez	785	Capitanía de Puerto	864822	211122	10	6	*	*	*	*	*	*	*	*	*	*	*	*	*	*	*	*	*	*	*	*	*	*	*	*	*	*	*	*	*	*	*	*	*	*	*	*	*	*	*	*
23	Quintana Roo	5	Benito Juárez	786	El Carajito	865648	210655	10	14	7	7	1	0	1	6	2	4	0	13	7	6	5	5	2	3	0	8	8	5	3	2	2	8	5	3	7	4	3	0	0	0	0	0	0	100	4	9	4	2
23	Quintana Roo	5	Benito Juárez	788	Rosita de Olivo	870143	210416	10	2	*	*	*	*	*	*	*	*	*	*	*	*	*	*	*	*	*	*	*	*	*	*	*	*	*	*	*	*	*	*	*	*	*	*	*	*	*	*	*	*
23	Quintana Roo	5	Benito Juárez	791	Casa Blanca	865513	210731	5	9	*	*	*	*	*	*	*	*	*	*	*	*	*	*	*	*	*	*	*	*	*	*	*	*	*	*	*	*	*	*	*	*	*	*	*	*	*	*	*	*
23	Quintana Roo	5	Benito Juárez	799	Cetina	865542	210709	5	2	*	*	*	*	*	*	*	*	*	*	*	*	*	*	*	*	*	*	*	*	*	*	*	*	*	*	*	*	*	*	*	*	*	*	*	*	*	*	*	*
23	Quintana Roo	5	Benito Juárez	802	Las Coloradas	865821	210601	5	2	*	*	*	*	*	*	*	*	*	*	*	*	*	*	*	*	*	*	*	*	*	*	*	*	*	*	*	*	*	*	*	*	*	*	*	*	*	*	*	*
23	Quintana Roo	5	Benito Juárez	808	Darlin	865902	210536	5	4	*	*	*	*	*	*	*	*	*	*	*	*	*	*	*	*	*	*	*	*	*	*	*	*	*	*	*	*	*	*	*	*	*	*	*	*	*	*	*	*
23	Quintana Roo	5	Benito Juárez	822	Esteban Mayo	865033	211234	10	554	281	273	72	33	39	177	87	90	14	366	190	176	65	91	48	43	26	287	261	136	125	79	119	255	133	122	237	123	114	6	3	3	3	1	2	102.93	2.39	343	22	12
23	Quintana Roo	5	Benito Juárez	831	Guadalupe	870530	210437	10	1	*	*	*	*	*	*	*	*	*	*	*	*	*	*	*	*	*	*	*	*	*	*	*	*	*	*	*	*	*	*	*	*	*	*	*	*	*	*	*	*
23	Quintana Roo	5	Benito Juárez	832	La Guadalupe	865542	210707	5	4	*	*	*	*	*	*	*	*	*	*	*	*	*	*	*	*	*	*	*	*	*	*	*	*	*	*	*	*	*	*	*	*	*	*	*	*	*	*	*	*
23	Quintana Roo	5	Benito Juárez	834	La Morena	865026	211216	10	826	450	376	100	62	38	266	163	103	24	628	340	288	109	142	85	57	33	495	462	239	223	142	201	439	228	211	427	222	205	23	11	12	16	9	7	119.68	2.3	553	69	35
23	Quintana Roo	5	Benito Juárez	836	San Ignacio	870032	210456	5	4	*	*	*	*	*	*	*	*	*	*	*	*	*	*	*	*	*	*	*	*	*	*	*	*	*	*	*	*	*	*	*	*	*	*	*	*	*	*	*	*
23	Quintana Roo	5	Benito Juárez	838	Inmo Recubre	865018	210657	5	1	*	*	*	*	*	*	*	*	*	*	*	*	*	*	*	*	*	*	*	*	*	*	*	*	*	*	*	*	*	*	*	*	*	*	*	*	*	*	*	*
23	Quintana Roo	5	Benito Juárez	839	El Tigre	870521	210851	10	4	*	*	*	*	*	*	*	*	*	*	*	*	*	*	*	*	*	*	*	*	*	*	*	*	*	*	*	*	*	*	*	*	*	*	*	*	*	*	*	*
23	Quintana Roo	5	Benito Juárez	846	La Bonita	870233	210351	5	8	*	*	*	*	*	*	*	*	*	*	*	*	*	*	*	*	*	*	*	*	*	*	*	*	*	*	*	*	*	*	*	*	*	*	*	*	*	*	*	*
23	Quintana Roo	5	Benito Juárez	848	Localidad sin Nombre	870208	210354	5	1	*	*	*	*	*	*	*	*	*	*	*	*	*	*	*	*	*	*	*	*	*	*	*	*	*	*	*	*	*	*	*	*	*	*	*	*	*	*	*	*
23	Quintana Roo	5	Benito Juárez	853	Localidad sin Nombre	865744	210615	5	6	*	*	*	*	*	*	*	*	*	*	*	*	*	*	*	*	*	*	*	*	*	*	*	*	*	*	*	*	*	*	*	*	*	*	*	*	*	*	*	*
23	Quintana Roo	5	Benito Juárez	855	Julio Omar Cahuich	865739	210618	5	12	5	7	0	0	0	1	0	1	0	12	5	7	0	1	0	1	1	12	11	5	6	6	5	10	5	5	6	3	3	1	0	1	0	0	0	71.43	2.43	12	0	0
23	Quintana Roo	5	Benito Juárez	856	Localidad sin Nombre	865733	210621	5	2	*	*	*	*	*	*	*	*	*	*	*	*	*	*	*	*	*	*	*	*	*	*	*	*	*	*	*	*	*	*	*	*	*	*	*	*	*	*	*	*
23	Quintana Roo	5	Benito Juárez	858	Localidad sin Nombre	865940	210524	5	1	*	*	*	*	*	*	*	*	*	*	*	*	*	*	*	*	*	*	*	*	*	*	*	*	*	*	*	*	*	*	*	*	*	*	*	*	*	*	*	*
23	Quintana Roo	5	Benito Juárez	860	Localidad sin Nombre	865714	210630	5	4	*	*	*	*	*	*	*	*	*	*	*	*	*	*	*	*	*	*	*	*	*	*	*	*	*	*	*	*	*	*	*	*	*	*	*	*	*	*	*	*
23	Quintana Roo	5	Benito Juárez	861	Chichén	865719	210609	5	9	*	*	*	*	*	*	*	*	*	*	*	*	*	*	*	*	*	*	*	*	*	*	*	*	*	*	*	*	*	*	*	*	*	*	*	*	*	*	*	*
23	Quintana Roo	5	Benito Juárez	865	Localidad sin Nombre	865500	210737	5	10	*	*	*	*	*	*	*	*	*	*	*	*	*	*	*	*	*	*	*	*	*	*	*	*	*	*	*	*	*	*	*	*	*	*	*	*	*	*	*	*
23	Quintana Roo	5	Benito Juárez	876	Localidad sin Nombre	865033	205526	10	2	*	*	*	*	*	*	*	*	*	*	*	*	*	*	*	*	*	*	*	*	*	*	*	*	*	*	*	*	*	*	*	*	*	*	*	*	*	*	*	*
23	Quintana Roo	5	Benito Juárez	883	Rancho Chico	865515	204921	10	9	6	3	2	1	1	2	1	1	0	7	5	2	0	0	0	0	0	7	7	5	2	2	2	7	5	2	5	3	2	0	0	0	0	0	0	200	3.5	2	5	4
23	Quintana Roo	5	Benito Juárez	886	La Casa Blanca	864819	211155	10	11	*	*	*	*	*	*	*	*	*	*	*	*	*	*	*	*	*	*	*	*	*	*	*	*	*	*	*	*	*	*	*	*	*	*	*	*	*	*	*	*
23	Quintana Roo	5	Benito Juárez	887	Costa Esmeralda	864820	211154	10	17	9	8	0	0	0	0	0	0	0	5	3	2	0	0	0	0	0	5	5	3	2	0	2	5	3	2	5	3	2	0	0	0	0	0	0	112.5	0	1	0	0
23	Quintana Roo	5	Benito Juárez	891	La Esperanza	865030	211222	10	6	*	*	*	*	*	*	*	*	*	*	*	*	*	*	*	*	*	*	*	*	*	*	*	*	*	*	*	*	*	*	*	*	*	*	*	*	*	*	*	*
23	Quintana Roo	5	Benito Juárez	899	Localidad sin Nombre	864819	211149	10	4	*	*	*	*	*	*	*	*	*	*	*	*	*	*	*	*	*	*	*	*	*	*	*	*	*	*	*	*	*	*	*	*	*	*	*	*	*	*	*	*
23	Quintana Roo	5	Benito Juárez	902	Go-Karts Cancún	865021	210614	5	3	*	*	*	*	*	*	*	*	*	*	*	*	*	*	*	*	*	*	*	*	*	*	*	*	*	*	*	*	*	*	*	*	*	*	*	*	*	*	*	*
23	Quintana Roo	5	Benito Juárez	912	Mágico	865031	210506	5	4	*	*	*	*	*	*	*	*	*	*	*	*	*	*	*	*	*	*	*	*	*	*	*	*	*	*	*	*	*	*	*	*	*	*	*	*	*	*	*	*
23	Quintana Roo	5	Benito Juárez	915	María Isabel Tuz Hau	865800	210457	5	5	*	*	*	*	*	*	*	*	*	*	*	*	*	*	*	*	*	*	*	*	*	*	*	*	*	*	*	*	*	*	*	*	*	*	*	*	*	*	*	*
23	Quintana Roo	5	Benito Juárez	917	Mi Ranchito	870342	210321	5	3	*	*	*	*	*	*	*	*	*	*	*	*	*	*	*	*	*	*	*	*	*	*	*	*	*	*	*	*	*	*	*	*	*	*	*	*	*	*	*	*
23	Quintana Roo	5	Benito Juárez	925	San Manuel	870528	210420	10	3	*	*	*	*	*	*	*	*	*	*	*	*	*	*	*	*	*	*	*	*	*	*	*	*	*	*	*	*	*	*	*	*	*	*	*	*	*	*	*	*
23	Quintana Roo	5	Benito Juárez	927	La Ceiba	870438	210332	5	6	*	*	*	*	*	*	*	*	*	*	*	*	*	*	*	*	*	*	*	*	*	*	*	*	*	*	*	*	*	*	*	*	*	*	*	*	*	*	*	*
23	Quintana Roo	5	Benito Juárez	928	El Milagro	865435	210738	5	1679	864	815	180	93	87	388	198	190	30	882	463	419	126	178	88	90	52	726	674	358	316	222	282	646	341	305	629	334	295	28	17	11	20	11	9	106.01	2.57	684	192	99
23	Quintana Roo	5	Benito Juárez	931	Nicolás Mejía	865244	211049	10	2	*	*	*	*	*	*	*	*	*	*	*	*	*	*	*	*	*	*	*	*	*	*	*	*	*	*	*	*	*	*	*	*	*	*	*	*	*	*	*	*
23	Quintana Roo	5	Benito Juárez	932	Nuevo Milenio	865447	210727	5	566	279	287	76	36	40	184	82	102	19	425	211	214	66	89	36	53	23	340	317	165	152	111	142	305	158	147	287	151	136	12	7	5	5	3	2	97.21	2.3	303	121	66
23	Quintana Roo	5	Benito Juárez	933	Gadient	870529	210411	10	2	*	*	*	*	*	*	*	*	*	*	*	*	*	*	*	*	*	*	*	*	*	*	*	*	*	*	*	*	*	*	*	*	*	*	*	*	*	*	*	*
23	Quintana Roo	5	Benito Juárez	936	El Palmar	870120	210426	5	8	*	*	*	*	*	*	*	*	*	*	*	*	*	*	*	*	*	*	*	*	*	*	*	*	*	*	*	*	*	*	*	*	*	*	*	*	*	*	*	*
23	Quintana Roo	5	Benito Juárez	937	Santa Anita	865421	210757	5	118	62	56	10	4	6	21	9	12	1	73	40	33	6	10	5	5	4	66	62	35	27	28	26	60	34	26	55	33	22	2	1	1	1	0	1	110.71	1.39	56	17	11
23	Quintana Roo	5	Benito Juárez	939	Parcela Doce	870525	210324	10	8	*	*	*	*	*	*	*	*	*	*	*	*	*	*	*	*	*	*	*	*	*	*	*	*	*	*	*	*	*	*	*	*	*	*	*	*	*	*	*	*
23	Quintana Roo	5	Benito Juárez	946	Plaza Veintiuno	865508	210737	5	4	3	1	0	0	0	0	0	0	0	4	3	1	0	0	0	0	0	4	4	3	1	0	1	4	3	1	4	3	1	0	0	0	0	0	0	300	1	2	2	2
23	Quintana Roo	5	Benito Juárez	947	La Bendición de Dios	870449	210354	10	5	*	*	*	*	*	*	*	*	*	*	*	*	*	*	*	*	*	*	*	*	*	*	*	*	*	*	*	*	*	*	*	*	*	*	*	*	*	*	*	*
23	Quintana Roo	5	Benito Juárez	948	Agua Azul	865844	210537	5	1	*	*	*	*	*	*	*	*	*	*	*	*	*	*	*	*	*	*	*	*	*	*	*	*	*	*	*	*	*	*	*	*	*	*	*	*	*	*	*	*
23	Quintana Roo	5	Benito Juárez	949	Dimasur	865235	205445	10	3	*	*	*	*	*	*	*	*	*	*	*	*	*	*	*	*	*	*	*	*	*	*	*	*	*	*	*	*	*	*	*	*	*	*	*	*	*	*	*	*
23	Quintana Roo	5	Benito Juárez	950	Puerto	865050	210240	5	8	*	*	*	*	*	*	*	*	*	*	*	*	*	*	*	*	*	*	*	*	*	*	*	*	*	*	*	*	*	*	*	*	*	*	*	*	*	*	*	*
23	Quintana Roo	5	Benito Juárez	952	Eben Ezer	865932	210535	5	23	11	12	0	0	0	0	0	0	0	0	0	0	0	0	0	0	0	0	0	0	0	0	0	0	0	0	0	0	0	0	0	0	0	0	0	91.67	*	0	0	0
23	Quintana Roo	5	Benito Juárez	953	Quinta los Ranos	870144	210419	5	1	*	*	*	*	*	*	*	*	*	*	*	*	*	*	*	*	*	*	*	*	*	*	*	*	*	*	*	*	*	*	*	*	*	*	*	*	*	*	*	*
23	Quintana Roo	5	Benito Juárez	959	Renato Mapume	870204	205955	5	2	*	*	*	*	*	*	*	*	*	*	*	*	*	*	*	*	*	*	*	*	*	*	*	*	*	*	*	*	*	*	*	*	*	*	*	*	*	*	*	*
23	Quintana Roo	5	Benito Juárez	960	Residencial Álamos	865031	210655	5	829	399	430	38	11	27	134	61	73	7	470	227	243	62	89	49	40	27	401	374	177	197	116	176	355	166	189	328	160	168	19	11	8	11	4	7	92.79	1.47	339	119	51
23	Quintana Roo	5	Benito Juárez	961	Residencial Pintores	865045	210600	5	154	79	75	8	3	5	25	12	13	2	96	51	45	10	15	8	7	5	84	79	42	37	15	29	68	36	32	71	38	33	11	6	5	7	5	2	105.33	1.57	77	15	8
23	Quintana Roo	5	Benito Juárez	964	San Carlos	870428	210243	5	2	*	*	*	*	*	*	*	*	*	*	*	*	*	*	*	*	*	*	*	*	*	*	*	*	*	*	*	*	*	*	*	*	*	*	*	*	*	*	*	*
23	Quintana Roo	5	Benito Juárez	965	San José	865659	210637	5	18	10	8	2	0	2	2	0	2	0	16	10	6	0	0	0	0	0	16	16	10	6	7	4	14	9	5	13	8	5	2	1	1	2	1	1	125	1.83	15	0	0
23	Quintana Roo	5	Benito Juárez	967	San Luis	865558	204912	10	1	*	*	*	*	*	*	*	*	*	*	*	*	*	*	*	*	*	*	*	*	*	*	*	*	*	*	*	*	*	*	*	*	*	*	*	*	*	*	*	*
23	Quintana Roo	5	Benito Juárez	969	San Miguel	870343	210315	5	4	*	*	*	*	*	*	*	*	*	*	*	*	*	*	*	*	*	*	*	*	*	*	*	*	*	*	*	*	*	*	*	*	*	*	*	*	*	*	*	*
23	Quintana Roo	5	Benito Juárez	971	La Veracruzana	865232	205458	10	5	*	*	*	*	*	*	*	*	*	*	*	*	*	*	*	*	*	*	*	*	*	*	*	*	*	*	*	*	*	*	*	*	*	*	*	*	*	*	*	*
23	Quintana Roo	5	Benito Juárez	972	San Silvestre	870036	210453	5	4	*	*	*	*	*	*	*	*	*	*	*	*	*	*	*	*	*	*	*	*	*	*	*	*	*	*	*	*	*	*	*	*	*	*	*	*	*	*	*	*
23	Quintana Roo	5	Benito Juárez	973	San Vicente	865458	210738	5	13	7	6	2	1	1	3	2	1	0	11	6	5	0	1	1	0	1	11	10	5	5	7	5	10	5	5	6	3	3	0	0	0	0	0	0	116.67	1.4	11	0	0
23	Quintana Roo	5	Benito Juárez	976	Santa Cecilia	870047	210442	5	6	*	*	*	*	*	*	*	*	*	*	*	*	*	*	*	*	*	*	*	*	*	*	*	*	*	*	*	*	*	*	*	*	*	*	*	*	*	*	*	*
23	Quintana Roo	5	Benito Juárez	979	Casa del Cielo	865140	205324	10	1	*	*	*	*	*	*	*	*	*	*	*	*	*	*	*	*	*	*	*	*	*	*	*	*	*	*	*	*	*	*	*	*	*	*	*	*	*	*	*	*
23	Quintana Roo	5	Benito Juárez	1001	El Zafarrancho	865230	205443	10	3	*	*	*	*	*	*	*	*	*	*	*	*	*	*	*	*	*	*	*	*	*	*	*	*	*	*	*	*	*	*	*	*	*	*	*	*	*	*	*	*
23	Quintana Roo	5	Benito Juárez	1002	Armando León Paredes	871407	205834	10	4	*	*	*	*	*	*	*	*	*	*	*	*	*	*	*	*	*	*	*	*	*	*	*	*	*	*	*	*	*	*	*	*	*	*	*	*	*	*	*	*
23	Quintana Roo	5	Benito Juárez	1003	San Benito	871042	205953	10	6	*	*	*	*	*	*	*	*	*	*	*	*	*	*	*	*	*	*	*	*	*	*	*	*	*	*	*	*	*	*	*	*	*	*	*	*	*	*	*	*
23	Quintana Roo	5	Benito Juárez	1006	Lluvias de Oro	870637	210147	10	6	*	*	*	*	*	*	*	*	*	*	*	*	*	*	*	*	*	*	*	*	*	*	*	*	*	*	*	*	*	*	*	*	*	*	*	*	*	*	*	*
23	Quintana Roo	5	Benito Juárez	1009	Elio Toledo Cansino	871253	205841	10	4	*	*	*	*	*	*	*	*	*	*	*	*	*	*	*	*	*	*	*	*	*	*	*	*	*	*	*	*	*	*	*	*	*	*	*	*	*	*	*	*
23	Quintana Roo	5	Benito Juárez	1011	El Gavilán	871712	205732	10	4	*	*	*	*	*	*	*	*	*	*	*	*	*	*	*	*	*	*	*	*	*	*	*	*	*	*	*	*	*	*	*	*	*	*	*	*	*	*	*	*
23	Quintana Roo	5	Benito Juárez	1013	Guadalupe	871147	205836	10	8	*	*	*	*	*	*	*	*	*	*	*	*	*	*	*	*	*	*	*	*	*	*	*	*	*	*	*	*	*	*	*	*	*	*	*	*	*	*	*	*
23	Quintana Roo	5	Benito Juárez	1014	Hipólito Manríquez	871918	205657	10	4	*	*	*	*	*	*	*	*	*	*	*	*	*	*	*	*	*	*	*	*	*	*	*	*	*	*	*	*	*	*	*	*	*	*	*	*	*	*	*	*
23	Quintana Roo	5	Benito Juárez	1016	La Gloria (Kilómetro 13.5)	870525	210956	10	4	*	*	*	*	*	*	*	*	*	*	*	*	*	*	*	*	*	*	*	*	*	*	*	*	*	*	*	*	*	*	*	*	*	*	*	*	*	*	*	*
23	Quintana Roo	5	Benito Juárez	1020	San Diego	870509	210242	10	1	*	*	*	*	*	*	*	*	*	*	*	*	*	*	*	*	*	*	*	*	*	*	*	*	*	*	*	*	*	*	*	*	*	*	*	*	*	*	*	*
23	Quintana Roo	5	Benito Juárez	1021	Localidad sin Nombre	870645	210148	10	4	*	*	*	*	*	*	*	*	*	*	*	*	*	*	*	*	*	*	*	*	*	*	*	*	*	*	*	*	*	*	*	*	*	*	*	*	*	*	*	*
23	Quintana Roo	5	Benito Juárez	1025	Localidad sin Nombre	871611	205754	10	4	*	*	*	*	*	*	*	*	*	*	*	*	*	*	*	*	*	*	*	*	*	*	*	*	*	*	*	*	*	*	*	*	*	*	*	*	*	*	*	*
23	Quintana Roo	5	Benito Juárez	1026	Las Carmelitas	871538	205805	10	3	*	*	*	*	*	*	*	*	*	*	*	*	*	*	*	*	*	*	*	*	*	*	*	*	*	*	*	*	*	*	*	*	*	*	*	*	*	*	*	*
23	Quintana Roo	5	Benito Juárez	1027	Los Retoños	871514	205815	10	4	*	*	*	*	*	*	*	*	*	*	*	*	*	*	*	*	*	*	*	*	*	*	*	*	*	*	*	*	*	*	*	*	*	*	*	*	*	*	*	*
23	Quintana Roo	5	Benito Juárez	1028	Localidad sin Nombre	871350	205839	10	5	*	*	*	*	*	*	*	*	*	*	*	*	*	*	*	*	*	*	*	*	*	*	*	*	*	*	*	*	*	*	*	*	*	*	*	*	*	*	*	*
23	Quintana Roo	5	Benito Juárez	1029	Localidad sin Nombre	871336	205850	10	4	*	*	*	*	*	*	*	*	*	*	*	*	*	*	*	*	*	*	*	*	*	*	*	*	*	*	*	*	*	*	*	*	*	*	*	*	*	*	*	*
23	Quintana Roo	5	Benito Juárez	1030	La Carcajada	870748	210117	10	1	*	*	*	*	*	*	*	*	*	*	*	*	*	*	*	*	*	*	*	*	*	*	*	*	*	*	*	*	*	*	*	*	*	*	*	*	*	*	*	*
23	Quintana Roo	5	Benito Juárez	1031	Los Panchos	870739	210121	10	4	*	*	*	*	*	*	*	*	*	*	*	*	*	*	*	*	*	*	*	*	*	*	*	*	*	*	*	*	*	*	*	*	*	*	*	*	*	*	*	*
23	Quintana Roo	5	Benito Juárez	1032	Agua Escondida	870802	210108	10	2	*	*	*	*	*	*	*	*	*	*	*	*	*	*	*	*	*	*	*	*	*	*	*	*	*	*	*	*	*	*	*	*	*	*	*	*	*	*	*	*
23	Quintana Roo	5	Benito Juárez	1033	El Búfalo	870520	211018	10	4	*	*	*	*	*	*	*	*	*	*	*	*	*	*	*	*	*	*	*	*	*	*	*	*	*	*	*	*	*	*	*	*	*	*	*	*	*	*	*	*
23	Quintana Roo	5	Benito Juárez	1034	Los Laureles	871044	205947	10	2	*	*	*	*	*	*	*	*	*	*	*	*	*	*	*	*	*	*	*	*	*	*	*	*	*	*	*	*	*	*	*	*	*	*	*	*	*	*	*	*
23	Quintana Roo	5	Benito Juárez	1035	El Abuelo	870458	210243	10	2	*	*	*	*	*	*	*	*	*	*	*	*	*	*	*	*	*	*	*	*	*	*	*	*	*	*	*	*	*	*	*	*	*	*	*	*	*	*	*	*
23	Quintana Roo	5	Benito Juárez	1037	La Misericordia de Dios	870519	211146	10	4	*	*	*	*	*	*	*	*	*	*	*	*	*	*	*	*	*	*	*	*	*	*	*	*	*	*	*	*	*	*	*	*	*	*	*	*	*	*	*	*
23	Quintana Roo	5	Benito Juárez	1038	Villa Guadalupe	870449	210247	10	6	*	*	*	*	*	*	*	*	*	*	*	*	*	*	*	*	*	*	*	*	*	*	*	*	*	*	*	*	*	*	*	*	*	*	*	*	*	*	*	*
23	Quintana Roo	5	Benito Juárez	1042	El Palomar	871740	205715	10	4	*	*	*	*	*	*	*	*	*	*	*	*	*	*	*	*	*	*	*	*	*	*	*	*	*	*	*	*	*	*	*	*	*	*	*	*	*	*	*	*
23	Quintana Roo	5	Benito Juárez	1043	Las Palomas del Señor	871917	205710	10	4	*	*	*	*	*	*	*	*	*	*	*	*	*	*	*	*	*	*	*	*	*	*	*	*	*	*	*	*	*	*	*	*	*	*	*	*	*	*	*	*
23	Quintana Roo	5	Benito Juárez	1047	Sac-Lol	871640	205742	10	3	*	*	*	*	*	*	*	*	*	*	*	*	*	*	*	*	*	*	*	*	*	*	*	*	*	*	*	*	*	*	*	*	*	*	*	*	*	*	*	*
23	Quintana Roo	5	Benito Juárez	1050	San Frogs	871529	205808	10	4	*	*	*	*	*	*	*	*	*	*	*	*	*	*	*	*	*	*	*	*	*	*	*	*	*	*	*	*	*	*	*	*	*	*	*	*	*	*	*	*
23	Quintana Roo	5	Benito Juárez	1051	San Isidro	870525	211023	10	3	*	*	*	*	*	*	*	*	*	*	*	*	*	*	*	*	*	*	*	*	*	*	*	*	*	*	*	*	*	*	*	*	*	*	*	*	*	*	*	*
23	Quintana Roo	5	Benito Juárez	1054	Santa María Nativitas	871757	205709	10	4	*	*	*	*	*	*	*	*	*	*	*	*	*	*	*	*	*	*	*	*	*	*	*	*	*	*	*	*	*	*	*	*	*	*	*	*	*	*	*	*
23	Quintana Roo	5	Benito Juárez	1055	Santiago Tun	871724	205743	10	4	*	*	*	*	*	*	*	*	*	*	*	*	*	*	*	*	*	*	*	*	*	*	*	*	*	*	*	*	*	*	*	*	*	*	*	*	*	*	*	*
23	Quintana Roo	5	Benito Juárez	1056	Torno Largo	870814	210101	10	1	*	*	*	*	*	*	*	*	*	*	*	*	*	*	*	*	*	*	*	*	*	*	*	*	*	*	*	*	*	*	*	*	*	*	*	*	*	*	*	*
23	Quintana Roo	5	Benito Juárez	1057	Villa Loraina	870520	210943	10	4	*	*	*	*	*	*	*	*	*	*	*	*	*	*	*	*	*	*	*	*	*	*	*	*	*	*	*	*	*	*	*	*	*	*	*	*	*	*	*	*
23	Quintana Roo	5	Benito Juárez	1074	La Asunción	871633	205746	10	4	*	*	*	*	*	*	*	*	*	*	*	*	*	*	*	*	*	*	*	*	*	*	*	*	*	*	*	*	*	*	*	*	*	*	*	*	*	*	*	*
23	Quintana Roo	5	Benito Juárez	1076	Marthia	865143	205318	10	1	*	*	*	*	*	*	*	*	*	*	*	*	*	*	*	*	*	*	*	*	*	*	*	*	*	*	*	*	*	*	*	*	*	*	*	*	*	*	*	*
23	Quintana Roo	5	Benito Juárez	1080	Cuatro Hermanos	871815	205702	10	4	*	*	*	*	*	*	*	*	*	*	*	*	*	*	*	*	*	*	*	*	*	*	*	*	*	*	*	*	*	*	*	*	*	*	*	*	*	*	*	*
23	Quintana Roo	5	Benito Juárez	1082	Don Armando	865943	210506	10	4	*	*	*	*	*	*	*	*	*	*	*	*	*	*	*	*	*	*	*	*	*	*	*	*	*	*	*	*	*	*	*	*	*	*	*	*	*	*	*	*
23	Quintana Roo	5	Benito Juárez	1091	La Primavera	870214	210405	15	4	*	*	*	*	*	*	*	*	*	*	*	*	*	*	*	*	*	*	*	*	*	*	*	*	*	*	*	*	*	*	*	*	*	*	*	*	*	*	*	*
23	Quintana Roo	5	Benito Juárez	1092	Localidad sin Nombre	865933	210511	10	3	*	*	*	*	*	*	*	*	*	*	*	*	*	*	*	*	*	*	*	*	*	*	*	*	*	*	*	*	*	*	*	*	*	*	*	*	*	*	*	*
23	Quintana Roo	5	Benito Juárez	1097	Liberato Pech Cupul	871401	205835	10	4	*	*	*	*	*	*	*	*	*	*	*	*	*	*	*	*	*	*	*	*	*	*	*	*	*	*	*	*	*	*	*	*	*	*	*	*	*	*	*	*
23	Quintana Roo	5	Benito Juárez	1098	Los Malvones	871827	205703	10	3	*	*	*	*	*	*	*	*	*	*	*	*	*	*	*	*	*	*	*	*	*	*	*	*	*	*	*	*	*	*	*	*	*	*	*	*	*	*	*	*
23	Quintana Roo	5	Benito Juárez	1099	Marcos Ayala	865655	210439	10	4	*	*	*	*	*	*	*	*	*	*	*	*	*	*	*	*	*	*	*	*	*	*	*	*	*	*	*	*	*	*	*	*	*	*	*	*	*	*	*	*
23	Quintana Roo	5	Benito Juárez	1101	Los Morocos	871714	205725	10	4	*	*	*	*	*	*	*	*	*	*	*	*	*	*	*	*	*	*	*	*	*	*	*	*	*	*	*	*	*	*	*	*	*	*	*	*	*	*	*	*
23	Quintana Roo	5	Benito Juárez	1102	Pasión y Perjuicio	865948	210503	10	4	*	*	*	*	*	*	*	*	*	*	*	*	*	*	*	*	*	*	*	*	*	*	*	*	*	*	*	*	*	*	*	*	*	*	*	*	*	*	*	*
23	Quintana Roo	5	Benito Juárez	1104	Rancho Alegre	865952	210501	10	1	*	*	*	*	*	*	*	*	*	*	*	*	*	*	*	*	*	*	*	*	*	*	*	*	*	*	*	*	*	*	*	*	*	*	*	*	*	*	*	*
23	Quintana Roo	5	Benito Juárez	1108	Rigo Tovar	871331	205853	10	4	*	*	*	*	*	*	*	*	*	*	*	*	*	*	*	*	*	*	*	*	*	*	*	*	*	*	*	*	*	*	*	*	*	*	*	*	*	*	*	*
23	Quintana Roo	5	Benito Juárez	1109	La Roca	870623	210159	15	4	*	*	*	*	*	*	*	*	*	*	*	*	*	*	*	*	*	*	*	*	*	*	*	*	*	*	*	*	*	*	*	*	*	*	*	*	*	*	*	*
23	Quintana Roo	5	Benito Juárez	1111	Santa Rosa	870758	210105	15	1	*	*	*	*	*	*	*	*	*	*	*	*	*	*	*	*	*	*	*	*	*	*	*	*	*	*	*	*	*	*	*	*	*	*	*	*	*	*	*	*
23	Quintana Roo	5	Benito Juárez	1112	Chilam Balam	871620	205749	15	4	*	*	*	*	*	*	*	*	*	*	*	*	*	*	*	*	*	*	*	*	*	*	*	*	*	*	*	*	*	*	*	*	*	*	*	*	*	*	*	*
23	Quintana Roo	5	Benito Juárez	1113	Tamay Balam	871806	205705	15	4	*	*	*	*	*	*	*	*	*	*	*	*	*	*	*	*	*	*	*	*	*	*	*	*	*	*	*	*	*	*	*	*	*	*	*	*	*	*	*	*
23	Quintana Roo	5	Benito Juárez	1114	Unay Keh	871832	205702	15	4	*	*	*	*	*	*	*	*	*	*	*	*	*	*	*	*	*	*	*	*	*	*	*	*	*	*	*	*	*	*	*	*	*	*	*	*	*	*	*	*
23	Quintana Roo	5	Benito Juárez	1115	Viani	865456	210745	10	17	10	7	5	4	1	10	6	4	2	12	6	6	3	3	1	2	0	7	7	4	3	3	3	6	3	3	6	3	3	1	1	0	0	0	0	142.86	3.67	6	6	3
23	Quintana Roo	5	Benito Juárez	1116	San Martín	870440	210328	10	4	*	*	*	*	*	*	*	*	*	*	*	*	*	*	*	*	*	*	*	*	*	*	*	*	*	*	*	*	*	*	*	*	*	*	*	*	*	*	*	*
23	Quintana Roo	5	Benito Juárez	1117	El Zapote	865501	210318	10	4	*	*	*	*	*	*	*	*	*	*	*	*	*	*	*	*	*	*	*	*	*	*	*	*	*	*	*	*	*	*	*	*	*	*	*	*	*	*	*	*
23	Quintana Roo	5	Benito Juárez	1118	Rancho Campana	865503	210321	10	1	*	*	*	*	*	*	*	*	*	*	*	*	*	*	*	*	*	*	*	*	*	*	*	*	*	*	*	*	*	*	*	*	*	*	*	*	*	*	*	*
23	Quintana Roo	5	Benito Juárez	1121	Localidad sin Nombre	865550	210351	10	4	*	*	*	*	*	*	*	*	*	*	*	*	*	*	*	*	*	*	*	*	*	*	*	*	*	*	*	*	*	*	*	*	*	*	*	*	*	*	*	*
23	Quintana Roo	5	Benito Juárez	1123	Las Luisitas	865835	210541	10	1	*	*	*	*	*	*	*	*	*	*	*	*	*	*	*	*	*	*	*	*	*	*	*	*	*	*	*	*	*	*	*	*	*	*	*	*	*	*	*	*
23	Quintana Roo	5	Benito Juárez	1125	MK	865439	210751	10	6	*	*	*	*	*	*	*	*	*	*	*	*	*	*	*	*	*	*	*	*	*	*	*	*	*	*	*	*	*	*	*	*	*	*	*	*	*	*	*	*
23	Quintana Roo	5	Benito Juárez	1126	Sinaí	865214	211104	10	10	*	*	*	*	*	*	*	*	*	*	*	*	*	*	*	*	*	*	*	*	*	*	*	*	*	*	*	*	*	*	*	*	*	*	*	*	*	*	*	*
23	Quintana Roo	5	Benito Juárez	1127	El Duende Maya	865502	210325	10	1	*	*	*	*	*	*	*	*	*	*	*	*	*	*	*	*	*	*	*	*	*	*	*	*	*	*	*	*	*	*	*	*	*	*	*	*	*	*	*	*
23	Quintana Roo	5	Benito Juárez	1128	Rancho Paraíso	865508	210322	10	3	*	*	*	*	*	*	*	*	*	*	*	*	*	*	*	*	*	*	*	*	*	*	*	*	*	*	*	*	*	*	*	*	*	*	*	*	*	*	*	*
23	Quintana Roo	5	Benito Juárez	1129	Residencial México	865725	210641	10	277	142	135	47	20	27	89	43	46	4	187	100	87	29	38	19	19	9	154	145	77	68	44	61	143	75	68	134	72	62	2	2	0	2	2	0	105.19	2.27	137	50	23
23	Quintana Roo	5	Benito Juárez	1131	Soledad	865756	210525	10	3	*	*	*	*	*	*	*	*	*	*	*	*	*	*	*	*	*	*	*	*	*	*	*	*	*	*	*	*	*	*	*	*	*	*	*	*	*	*	*	*
23	Quintana Roo	5	Benito Juárez	1136	La Pura Reata	865740	205126	5	1	*	*	*	*	*	*	*	*	*	*	*	*	*	*	*	*	*	*	*	*	*	*	*	*	*	*	*	*	*	*	*	*	*	*	*	*	*	*	*	*
23	Quintana Roo	5	Benito Juárez	1137	Tumben Cuxtal	865511	205114	10	1	*	*	*	*	*	*	*	*	*	*	*	*	*	*	*	*	*	*	*	*	*	*	*	*	*	*	*	*	*	*	*	*	*	*	*	*	*	*	*	*
23	Quintana Roo	5	Benito Juárez	1138	Los Caporales	870655	210146	10	2	*	*	*	*	*	*	*	*	*	*	*	*	*	*	*	*	*	*	*	*	*	*	*	*	*	*	*	*	*	*	*	*	*	*	*	*	*	*	*	*
23	Quintana Roo	5	Benito Juárez	1139	El Carrizal	870648	210147	10	4	*	*	*	*	*	*	*	*	*	*	*	*	*	*	*	*	*	*	*	*	*	*	*	*	*	*	*	*	*	*	*	*	*	*	*	*	*	*	*	*
23	Quintana Roo	5	Benito Juárez	1140	Colonia Chiapaneca Siglo XXI	870022	210418	10	805	415	390	49	29	20	147	84	63	13	322	169	153	62	85	45	40	23	247	224	114	110	73	93	207	104	103	198	98	100	17	10	7	13	8	5	106.41	3.18	253	66	30
23	Quintana Roo	5	Benito Juárez	1142	Los Chitos	870651	210146	10	1	*	*	*	*	*	*	*	*	*	*	*	*	*	*	*	*	*	*	*	*	*	*	*	*	*	*	*	*	*	*	*	*	*	*	*	*	*	*	*	*
23	Quintana Roo	5	Benito Juárez	1143	Los Danieles	870632	211117	10	1	*	*	*	*	*	*	*	*	*	*	*	*	*	*	*	*	*	*	*	*	*	*	*	*	*	*	*	*	*	*	*	*	*	*	*	*	*	*	*	*
23	Quintana Roo	5	Benito Juárez	1145	La Guadalupana	870613	210319	10	2	*	*	*	*	*	*	*	*	*	*	*	*	*	*	*	*	*	*	*	*	*	*	*	*	*	*	*	*	*	*	*	*	*	*	*	*	*	*	*	*
23	Quintana Roo	5	Benito Juárez	1147	Kokonuts	870632	210156	10	1	*	*	*	*	*	*	*	*	*	*	*	*	*	*	*	*	*	*	*	*	*	*	*	*	*	*	*	*	*	*	*	*	*	*	*	*	*	*	*	*
23	Quintana Roo	5	Benito Juárez	1150	Monte Sión	870525	210251	10	3	*	*	*	*	*	*	*	*	*	*	*	*	*	*	*	*	*	*	*	*	*	*	*	*	*	*	*	*	*	*	*	*	*	*	*	*	*	*	*	*
23	Quintana Roo	5	Benito Juárez	1151	El Nido del Águila	870746	210111	10	1	*	*	*	*	*	*	*	*	*	*	*	*	*	*	*	*	*	*	*	*	*	*	*	*	*	*	*	*	*	*	*	*	*	*	*	*	*	*	*	*
23	Quintana Roo	5	Benito Juárez	1152	La Nueva Esperanza	870603	210400	10	1	*	*	*	*	*	*	*	*	*	*	*	*	*	*	*	*	*	*	*	*	*	*	*	*	*	*	*	*	*	*	*	*	*	*	*	*	*	*	*	*
23	Quintana Roo	5	Benito Juárez	1155	El Pedregal	870814	210102	10	2	*	*	*	*	*	*	*	*	*	*	*	*	*	*	*	*	*	*	*	*	*	*	*	*	*	*	*	*	*	*	*	*	*	*	*	*	*	*	*	*
23	Quintana Roo	5	Benito Juárez	1156	El Porvenir	870002	210442	10	206	107	99	8	5	3	40	20	20	3	97	51	46	21	29	14	15	8	73	65	36	29	17	25	60	33	27	60	33	27	5	3	2	3	2	1	108.08	2.94	69	28	16
23	Quintana Roo	5	Benito Juárez	1157	El Porvenir	870446	210248	10	1	*	*	*	*	*	*	*	*	*	*	*	*	*	*	*	*	*	*	*	*	*	*	*	*	*	*	*	*	*	*	*	*	*	*	*	*	*	*	*	*
23	Quintana Roo	5	Benito Juárez	1158	Quinta Rico	870938	210011	10	2	*	*	*	*	*	*	*	*	*	*	*	*	*	*	*	*	*	*	*	*	*	*	*	*	*	*	*	*	*	*	*	*	*	*	*	*	*	*	*	*
23	Quintana Roo	5	Benito Juárez	1159	San Ángel	870454	210350	10	3	*	*	*	*	*	*	*	*	*	*	*	*	*	*	*	*	*	*	*	*	*	*	*	*	*	*	*	*	*	*	*	*	*	*	*	*	*	*	*	*
23	Quintana Roo	5	Benito Juárez	1160	San Francisco	870855	210038	10	5	*	*	*	*	*	*	*	*	*	*	*	*	*	*	*	*	*	*	*	*	*	*	*	*	*	*	*	*	*	*	*	*	*	*	*	*	*	*	*	*
23	Quintana Roo	5	Benito Juárez	1165	Los Tres Balam	870639	211114	10	1	*	*	*	*	*	*	*	*	*	*	*	*	*	*	*	*	*	*	*	*	*	*	*	*	*	*	*	*	*	*	*	*	*	*	*	*	*	*	*	*
23	Quintana Roo	5	Benito Juárez	1166	Los Tres Castillo	870806	210052	10	7	*	*	*	*	*	*	*	*	*	*	*	*	*	*	*	*	*	*	*	*	*	*	*	*	*	*	*	*	*	*	*	*	*	*	*	*	*	*	*	*
23	Quintana Roo	5	Benito Juárez	1168	El Willy (parcela 17)	870524	210344	10	1	*	*	*	*	*	*	*	*	*	*	*	*	*	*	*	*	*	*	*	*	*	*	*	*	*	*	*	*	*	*	*	*	*	*	*	*	*	*	*	*
23	Quintana Roo	5	Benito Juárez	1169	La Zuncho	870613	210159	10	6	*	*	*	*	*	*	*	*	*	*	*	*	*	*	*	*	*	*	*	*	*	*	*	*	*	*	*	*	*	*	*	*	*	*	*	*	*	*	*	*
23	Quintana Roo	5	Benito Juárez	1173	Horizontes Marinos	864821	211125	5	1	*	*	*	*	*	*	*	*	*	*	*	*	*	*	*	*	*	*	*	*	*	*	*	*	*	*	*	*	*	*	*	*	*	*	*	*	*	*	*	*
23	Quintana Roo	5	Benito Juárez	1176	Localidad sin Nombre	864811	211233	5	1	*	*	*	*	*	*	*	*	*	*	*	*	*	*	*	*	*	*	*	*	*	*	*	*	*	*	*	*	*	*	*	*	*	*	*	*	*	*	*	*
23	Quintana Roo	5	Benito Juárez	1178	México Nuevo	864820	211129	5	6	*	*	*	*	*	*	*	*	*	*	*	*	*	*	*	*	*	*	*	*	*	*	*	*	*	*	*	*	*	*	*	*	*	*	*	*	*	*	*	*
23	Quintana Roo	5	Benito Juárez	1179	Amanecer del Bosque	865208	211107	10	39	23	16	1	1	0	5	4	1	1	19	12	7	3	3	2	1	0	15	15	9	6	5	6	15	9	6	11	6	5	0	0	0	0	0	0	143.75	2	14	5	4
23	Quintana Roo	5	Benito Juárez	1187	La Libertad	865507	210700	10	459	242	217	54	22	32	149	85	64	11	273	154	119	59	84	55	29	25	203	178	91	87	50	78	171	87	84	162	85	77	7	4	3	3	1	2	111.52	3.07	210	62	36
23	Quintana Roo	5	Benito Juárez	1190	Rancho Gubiña	870026	205134	5	1	*	*	*	*	*	*	*	*	*	*	*	*	*	*	*	*	*	*	*	*	*	*	*	*	*	*	*	*	*	*	*	*	*	*	*	*	*	*	*	*
23	Quintana Roo	5	Benito Juárez	1191	Santa Cecilia	865509	210724	10	377	185	192	36	15	21	99	48	51	5	237	118	119	38	58	32	26	20	194	174	85	89	52	75	164	81	83	163	80	83	10	4	6	4	2	2	96.35	2.7	196	40	20
23	Quintana Roo	5	Benito Juárez	1193	La Vereda Tropical	865806	205131	5	2	*	*	*	*	*	*	*	*	*	*	*	*	*	*	*	*	*	*	*	*	*	*	*	*	*	*	*	*	*	*	*	*	*	*	*	*	*	*	*	*
23	Quintana Roo	5	Benito Juárez	1197	Valle Verde	865615	210658	10	1087	549	538	148	74	74	383	189	194	22	803	407	396	149	213	101	112	64	632	568	292	276	177	243	541	279	262	530	272	258	27	13	14	14	7	7	102.04	2.51	691	108	57
23	Quintana Roo	5	Benito Juárez	1198	Depósito Federal de Grúas	865752	210528	10	5	*	*	*	*	*	*	*	*	*	*	*	*	*	*	*	*	*	*	*	*	*	*	*	*	*	*	*	*	*	*	*	*	*	*	*	*	*	*	*	*
23	Quintana Roo	5	Benito Juárez	1200	Grupo Integral del Caribe	865202	210125	10	1	*	*	*	*	*	*	*	*	*	*	*	*	*	*	*	*	*	*	*	*	*	*	*	*	*	*	*	*	*	*	*	*	*	*	*	*	*	*	*	*
23	Quintana Roo	5	Benito Juárez	1203	Cuna Maya	865324	210957	10	763	407	356	67	34	33	165	89	76	16	384	217	167	69	82	47	35	13	299	286	162	124	92	112	269	153	116	267	151	116	17	9	8	10	6	4	114.33	2.84	324	59	30
23	Quintana Roo	5	Benito Juárez	1204	San Ignacio (Región 212)	865306	210943	10	163	88	75	14	6	8	40	20	20	3	106	60	46	17	23	13	10	6	86	80	46	34	24	33	80	46	34	73	41	32	0	0	0	0	0	0	117.33	2.14	93	11	5
23	Quintana Roo	5	Benito Juárez	1225	La Paz	871117	205905	10	2	*	*	*	*	*	*	*	*	*	*	*	*	*	*	*	*	*	*	*	*	*	*	*	*	*	*	*	*	*	*	*	*	*	*	*	*	*	*	*	*
23	Quintana Roo	5	Benito Juárez	1230	Localidad sin Nombre	871331	205847	10	2	*	*	*	*	*	*	*	*	*	*	*	*	*	*	*	*	*	*	*	*	*	*	*	*	*	*	*	*	*	*	*	*	*	*	*	*	*	*	*	*
23	Quintana Roo	5	Benito Juárez	1242	El Trópico	871031	205956	10	4	*	*	*	*	*	*	*	*	*	*	*	*	*	*	*	*	*	*	*	*	*	*	*	*	*	*	*	*	*	*	*	*	*	*	*	*	*	*	*	*
23	Quintana Roo	5	Benito Juárez	1249	La Comarca	865746	210522	10	25	14	11	3	2	1	13	7	6	1	22	12	10	6	9	5	4	3	15	12	7	5	3	5	12	7	5	11	7	4	0	0	0	0	0	0	127.27	3.5	10	12	6
23	Quintana Roo	5	Benito Juárez	1259	El Trébol	865524	210714	10	107	56	51	12	6	6	29	14	15	2	71	38	33	11	15	8	7	4	58	54	30	24	19	20	51	28	23	47	26	21	3	2	1	1	0	1	109.8	2.69	55	16	10
23	Quintana Roo	5	Benito Juárez	1261	Las Palmas	865942	210528	10	23	11	12	4	1	3	8	3	5	0	19	10	9	3	4	2	2	1	16	15	8	7	5	6	15	8	7	13	7	6	0	0	0	0	0	0	91.67	2.67	16	3	2
23	Quintana Roo	5	Benito Juárez	1263	La Escondida	864956	211234	10	177	87	90	10	4	6	18	7	11	0	31	16	15	6	8	3	5	2	25	23	13	10	3	9	21	12	9	23	13	10	2	1	1	1	1	0	96.67	2.91	27	4	3
23	Quintana Roo	5	Benito Juárez	1266	10 de Septiembre	870534	210219	10	2	*	*	*	*	*	*	*	*	*	*	*	*	*	*	*	*	*	*	*	*	*	*	*	*	*	*	*	*	*	*	*	*	*	*	*	*	*	*	*	*
23	Quintana Roo	5	Benito Juárez	1267	Los 3 Hermanos	870800	205603	10	1	*	*	*	*	*	*	*	*	*	*	*	*	*	*	*	*	*	*	*	*	*	*	*	*	*	*	*	*	*	*	*	*	*	*	*	*	*	*	*	*
23	Quintana Roo	5	Benito Juárez	1268	Águila Real	870014	210500	10	12	5	7	1	0	1	4	1	3	0	11	5	6	2	3	1	2	1	9	8	4	4	1	4	8	4	4	8	4	4	0	0	0	0	0	0	71.43	1.8	11	0	0
23	Quintana Roo	5	Benito Juárez	1269	Agustín Figueroa	865636	210425	10	1	*	*	*	*	*	*	*	*	*	*	*	*	*	*	*	*	*	*	*	*	*	*	*	*	*	*	*	*	*	*	*	*	*	*	*	*	*	*	*	*
23	Quintana Roo	5	Benito Juárez	1270	Agustín García Escalante	865834	210919	10	3	*	*	*	*	*	*	*	*	*	*	*	*	*	*	*	*	*	*	*	*	*	*	*	*	*	*	*	*	*	*	*	*	*	*	*	*	*	*	*	*
23	Quintana Roo	5	Benito Juárez	1272	Los Atlantes	865608	210702	10	5	*	*	*	*	*	*	*	*	*	*	*	*	*	*	*	*	*	*	*	*	*	*	*	*	*	*	*	*	*	*	*	*	*	*	*	*	*	*	*	*
23	Quintana Roo	5	Benito Juárez	1274	Calisureño	865912	210531	10	3	*	*	*	*	*	*	*	*	*	*	*	*	*	*	*	*	*	*	*	*	*	*	*	*	*	*	*	*	*	*	*	*	*	*	*	*	*	*	*	*
23	Quintana Roo	5	Benito Juárez	1275	Campestre la Finca	870111	210436	10	9	5	4	3	2	1	3	2	1	0	6	3	3	0	0	0	0	0	6	6	3	3	3	3	6	3	3	4	2	2	0	0	0	0	0	0	125	2	3	3	1
23	Quintana Roo	5	Benito Juárez	1276	Campo de Tiro	870633	211113	10	1	*	*	*	*	*	*	*	*	*	*	*	*	*	*	*	*	*	*	*	*	*	*	*	*	*	*	*	*	*	*	*	*	*	*	*	*	*	*	*	*
23	Quintana Roo	5	Benito Juárez	1277	Chan Dzonot	865850	205128	10	3	*	*	*	*	*	*	*	*	*	*	*	*	*	*	*	*	*	*	*	*	*	*	*	*	*	*	*	*	*	*	*	*	*	*	*	*	*	*	*	*
23	Quintana Roo	5	Benito Juárez	1278	La Changa	870747	205647	10	3	*	*	*	*	*	*	*	*	*	*	*	*	*	*	*	*	*	*	*	*	*	*	*	*	*	*	*	*	*	*	*	*	*	*	*	*	*	*	*	*
23	Quintana Roo	5	Benito Juárez	1279	Los Coquitos	870537	210417	10	9	9	0	0	0	0	0	0	0	0	9	9	0	0	0	0	0	0	9	9	9	0	3	0	6	6	0	7	7	0	3	3	0	3	3	0	*	*	7	2	2
23	Quintana Roo	5	Benito Juárez	1280	Cuna de Lobos	870445	210319	10	9	7	2	0	0	0	2	2	0	0	9	7	2	2	2	2	0	0	7	7	5	2	1	2	6	4	2	7	5	2	1	1	0	1	1	0	350	1.5	4	5	4
23	Quintana Roo	5	Benito Juárez	1281	David Adame	865836	210910	10	4	*	*	*	*	*	*	*	*	*	*	*	*	*	*	*	*	*	*	*	*	*	*	*	*	*	*	*	*	*	*	*	*	*	*	*	*	*	*	*	*
23	Quintana Roo	5	Benito Juárez	1282	David Euan Canché	870738	205734	10	2	*	*	*	*	*	*	*	*	*	*	*	*	*	*	*	*	*	*	*	*	*	*	*	*	*	*	*	*	*	*	*	*	*	*	*	*	*	*	*	*
23	Quintana Roo	5	Benito Juárez	1285	Don Gildo	865707	210454	10	1	*	*	*	*	*	*	*	*	*	*	*	*	*	*	*	*	*	*	*	*	*	*	*	*	*	*	*	*	*	*	*	*	*	*	*	*	*	*	*	*
23	Quintana Roo	5	Benito Juárez	1286	Don Martín	870608	210208	10	1	*	*	*	*	*	*	*	*	*	*	*	*	*	*	*	*	*	*	*	*	*	*	*	*	*	*	*	*	*	*	*	*	*	*	*	*	*	*	*	*
23	Quintana Roo	5	Benito Juárez	1288	El Emporio	865556	210709	10	7	*	*	*	*	*	*	*	*	*	*	*	*	*	*	*	*	*	*	*	*	*	*	*	*	*	*	*	*	*	*	*	*	*	*	*	*	*	*	*	*
23	Quintana Roo	5	Benito Juárez	1289	Galaxia Itzales	865320	210737	5	3	*	*	*	*	*	*	*	*	*	*	*	*	*	*	*	*	*	*	*	*	*	*	*	*	*	*	*	*	*	*	*	*	*	*	*	*	*	*	*	*
23	Quintana Roo	5	Benito Juárez	1290	La Gallega	870254	210345	10	6	*	*	*	*	*	*	*	*	*	*	*	*	*	*	*	*	*	*	*	*	*	*	*	*	*	*	*	*	*	*	*	*	*	*	*	*	*	*	*	*
23	Quintana Roo	5	Benito Juárez	1291	Las Gaviotas	865022	210504	5	6	*	*	*	*	*	*	*	*	*	*	*	*	*	*	*	*	*	*	*	*	*	*	*	*	*	*	*	*	*	*	*	*	*	*	*	*	*	*	*	*
23	Quintana Roo	5	Benito Juárez	1292	El Gran León	865604	210705	10	3	*	*	*	*	*	*	*	*	*	*	*	*	*	*	*	*	*	*	*	*	*	*	*	*	*	*	*	*	*	*	*	*	*	*	*	*	*	*	*	*
23	Quintana Roo	5	Benito Juárez	1293	La Guadalupana	870518	210354	10	1	*	*	*	*	*	*	*	*	*	*	*	*	*	*	*	*	*	*	*	*	*	*	*	*	*	*	*	*	*	*	*	*	*	*	*	*	*	*	*	*
23	Quintana Roo	5	Benito Juárez	1294	La Ilusión	870305	211044	10	3	*	*	*	*	*	*	*	*	*	*	*	*	*	*	*	*	*	*	*	*	*	*	*	*	*	*	*	*	*	*	*	*	*	*	*	*	*	*	*	*
23	Quintana Roo	5	Benito Juárez	1297	Jesús Canul	865247	211050	10	35	15	20	1	0	1	6	0	6	1	11	3	8	2	4	0	4	2	8	6	3	3	2	3	6	3	3	4	2	2	0	0	0	0	0	0	75	1.6	3	8	2
23	Quintana Roo	5	Benito Juárez	1299	Jorge Cahuich	865341	210645	10	11	*	*	*	*	*	*	*	*	*	*	*	*	*	*	*	*	*	*	*	*	*	*	*	*	*	*	*	*	*	*	*	*	*	*	*	*	*	*	*	*
23	Quintana Roo	5	Benito Juárez	1301	Kilómetro 11	870724	205533	10	4	*	*	*	*	*	*	*	*	*	*	*	*	*	*	*	*	*	*	*	*	*	*	*	*	*	*	*	*	*	*	*	*	*	*	*	*	*	*	*	*
23	Quintana Roo	5	Benito Juárez	1302	Kilómetro 11	865036	210401	5	9	*	*	*	*	*	*	*	*	*	*	*	*	*	*	*	*	*	*	*	*	*	*	*	*	*	*	*	*	*	*	*	*	*	*	*	*	*	*	*	*
23	Quintana Roo	5	Benito Juárez	1303	Kilómetro 299	865826	210553	5	7	*	*	*	*	*	*	*	*	*	*	*	*	*	*	*	*	*	*	*	*	*	*	*	*	*	*	*	*	*	*	*	*	*	*	*	*	*	*	*	*
23	Quintana Roo	5	Benito Juárez	1304	Le Much	865759	205127	10	2	*	*	*	*	*	*	*	*	*	*	*	*	*	*	*	*	*	*	*	*	*	*	*	*	*	*	*	*	*	*	*	*	*	*	*	*	*	*	*	*
23	Quintana Roo	5	Benito Juárez	1305	Localidad sin Nombre	870529	210222	10	5	*	*	*	*	*	*	*	*	*	*	*	*	*	*	*	*	*	*	*	*	*	*	*	*	*	*	*	*	*	*	*	*	*	*	*	*	*	*	*	*
23	Quintana Roo	5	Benito Juárez	1307	Localidad sin Nombre	871050	205951	10	6	*	*	*	*	*	*	*	*	*	*	*	*	*	*	*	*	*	*	*	*	*	*	*	*	*	*	*	*	*	*	*	*	*	*	*	*	*	*	*	*
23	Quintana Roo	5	Benito Juárez	1308	Localidad sin Nombre	870541	210221	10	1	*	*	*	*	*	*	*	*	*	*	*	*	*	*	*	*	*	*	*	*	*	*	*	*	*	*	*	*	*	*	*	*	*	*	*	*	*	*	*	*
23	Quintana Roo	5	Benito Juárez	1309	Localidad sin Nombre	870525	211100	10	1	*	*	*	*	*	*	*	*	*	*	*	*	*	*	*	*	*	*	*	*	*	*	*	*	*	*	*	*	*	*	*	*	*	*	*	*	*	*	*	*
23	Quintana Roo	5	Benito Juárez	1310	Localidad sin Nombre	870524	210217	10	1	*	*	*	*	*	*	*	*	*	*	*	*	*	*	*	*	*	*	*	*	*	*	*	*	*	*	*	*	*	*	*	*	*	*	*	*	*	*	*	*
23	Quintana Roo	5	Benito Juárez	1313	Localidad sin nombre	870412	210306	10	3	*	*	*	*	*	*	*	*	*	*	*	*	*	*	*	*	*	*	*	*	*	*	*	*	*	*	*	*	*	*	*	*	*	*	*	*	*	*	*	*
23	Quintana Roo	5	Benito Juárez	1315	Loiritas Band	870537	210217	10	18	10	8	5	1	4	7	3	4	0	13	9	4	1	2	2	0	1	12	11	7	4	1	4	10	6	4	10	6	4	1	1	0	1	1	0	125	2.5	12	1	1
23	Quintana Roo	5	Benito Juárez	1316	La Lupita	865420	210802	5	3	*	*	*	*	*	*	*	*	*	*	*	*	*	*	*	*	*	*	*	*	*	*	*	*	*	*	*	*	*	*	*	*	*	*	*	*	*	*	*	*
23	Quintana Roo	5	Benito Juárez	1319	Maquinaria García	870229	210358	10	1	*	*	*	*	*	*	*	*	*	*	*	*	*	*	*	*	*	*	*	*	*	*	*	*	*	*	*	*	*	*	*	*	*	*	*	*	*	*	*	*
23	Quintana Roo	5	Benito Juárez	1320	Marco López	865149	210428	5	1	*	*	*	*	*	*	*	*	*	*	*	*	*	*	*	*	*	*	*	*	*	*	*	*	*	*	*	*	*	*	*	*	*	*	*	*	*	*	*	*
23	Quintana Roo	5	Benito Juárez	1321	Las Margaritas	870521	210820	10	1	*	*	*	*	*	*	*	*	*	*	*	*	*	*	*	*	*	*	*	*	*	*	*	*	*	*	*	*	*	*	*	*	*	*	*	*	*	*	*	*
23	Quintana Roo	5	Benito Juárez	1322	Mateo Santos	870539	210208	10	1	*	*	*	*	*	*	*	*	*	*	*	*	*	*	*	*	*	*	*	*	*	*	*	*	*	*	*	*	*	*	*	*	*	*	*	*	*	*	*	*
23	Quintana Roo	5	Benito Juárez	1323	Neijing	865749	205132	10	4	*	*	*	*	*	*	*	*	*	*	*	*	*	*	*	*	*	*	*	*	*	*	*	*	*	*	*	*	*	*	*	*	*	*	*	*	*	*	*	*
23	Quintana Roo	5	Benito Juárez	1324	El Niño de Atocha	865624	210706	10	3	*	*	*	*	*	*	*	*	*	*	*	*	*	*	*	*	*	*	*	*	*	*	*	*	*	*	*	*	*	*	*	*	*	*	*	*	*	*	*	*
23	Quintana Roo	5	Benito Juárez	1325	Orenda	870640	210145	10	4	*	*	*	*	*	*	*	*	*	*	*	*	*	*	*	*	*	*	*	*	*	*	*	*	*	*	*	*	*	*	*	*	*	*	*	*	*	*	*	*
23	Quintana Roo	5	Benito Juárez	1326	El Palomo	870359	205150	10	3	*	*	*	*	*	*	*	*	*	*	*	*	*	*	*	*	*	*	*	*	*	*	*	*	*	*	*	*	*	*	*	*	*	*	*	*	*	*	*	*
23	Quintana Roo	5	Benito Juárez	1327	Pedregal	865341	210706	5	44	20	24	5	1	4	9	4	5	0	20	10	10	4	4	3	1	0	16	16	7	9	5	8	14	6	8	14	7	7	2	1	1	0	0	0	83.33	2	18	2	1
23	Quintana Roo	5	Benito Juárez	1328	Pentatlán	865847	210544	10	1	*	*	*	*	*	*	*	*	*	*	*	*	*	*	*	*	*	*	*	*	*	*	*	*	*	*	*	*	*	*	*	*	*	*	*	*	*	*	*	*
23	Quintana Roo	5	Benito Juárez	1329	Las Potrancas	871025	205959	10	2	*	*	*	*	*	*	*	*	*	*	*	*	*	*	*	*	*	*	*	*	*	*	*	*	*	*	*	*	*	*	*	*	*	*	*	*	*	*	*	*
23	Quintana Roo	5	Benito Juárez	1330	La Primavera	865841	210536	10	5	*	*	*	*	*	*	*	*	*	*	*	*	*	*	*	*	*	*	*	*	*	*	*	*	*	*	*	*	*	*	*	*	*	*	*	*	*	*	*	*
23	Quintana Roo	5	Benito Juárez	1332	Rancho Santa Lucía	865550	210701	10	4	*	*	*	*	*	*	*	*	*	*	*	*	*	*	*	*	*	*	*	*	*	*	*	*	*	*	*	*	*	*	*	*	*	*	*	*	*	*	*	*
23	Quintana Roo	5	Benito Juárez	1336	Sac Beh de Guadalupe	870950	210005	10	6	*	*	*	*	*	*	*	*	*	*	*	*	*	*	*	*	*	*	*	*	*	*	*	*	*	*	*	*	*	*	*	*	*	*	*	*	*	*	*	*
23	Quintana Roo	5	Benito Juárez	1338	San Armando	870341	210304	10	1	*	*	*	*	*	*	*	*	*	*	*	*	*	*	*	*	*	*	*	*	*	*	*	*	*	*	*	*	*	*	*	*	*	*	*	*	*	*	*	*
23	Quintana Roo	5	Benito Juárez	1340	San Ignacio	870538	210223	10	9	*	*	*	*	*	*	*	*	*	*	*	*	*	*	*	*	*	*	*	*	*	*	*	*	*	*	*	*	*	*	*	*	*	*	*	*	*	*	*	*
23	Quintana Roo	5	Benito Juárez	1341	San Isidro	870248	211038	10	1	*	*	*	*	*	*	*	*	*	*	*	*	*	*	*	*	*	*	*	*	*	*	*	*	*	*	*	*	*	*	*	*	*	*	*	*	*	*	*	*
23	Quintana Roo	5	Benito Juárez	1345	Stone Wall	865840	210539	10	1	*	*	*	*	*	*	*	*	*	*	*	*	*	*	*	*	*	*	*	*	*	*	*	*	*	*	*	*	*	*	*	*	*	*	*	*	*	*	*	*
23	Quintana Roo	5	Benito Juárez	1346	Taller Turístico Aeroportuario	865029	210517	5	7	*	*	*	*	*	*	*	*	*	*	*	*	*	*	*	*	*	*	*	*	*	*	*	*	*	*	*	*	*	*	*	*	*	*	*	*	*	*	*	*
23	Quintana Roo	5	Benito Juárez	1348	Tres Ases	865939	210506	10	1	*	*	*	*	*	*	*	*	*	*	*	*	*	*	*	*	*	*	*	*	*	*	*	*	*	*	*	*	*	*	*	*	*	*	*	*	*	*	*	*
23	Quintana Roo	5	Benito Juárez	1349	Los Tres Corceles	865633	210428	10	8	*	*	*	*	*	*	*	*	*	*	*	*	*	*	*	*	*	*	*	*	*	*	*	*	*	*	*	*	*	*	*	*	*	*	*	*	*	*	*	*
23	Quintana Roo	5	Benito Juárez	1351	Vigas Pérez	865559	210707	10	1	*	*	*	*	*	*	*	*	*	*	*	*	*	*	*	*	*	*	*	*	*	*	*	*	*	*	*	*	*	*	*	*	*	*	*	*	*	*	*	*
23	Quintana Roo	5	Benito Juárez	1352	Vivero Ríos	870244	210344	10	4	*	*	*	*	*	*	*	*	*	*	*	*	*	*	*	*	*	*	*	*	*	*	*	*	*	*	*	*	*	*	*	*	*	*	*	*	*	*	*	*
23	Quintana Roo	5	Benito Juárez	9998	Localidades de una vivienda				1201	659	542	104	49	55	227	105	122	14	709	417	292	75	109	49	60	34	620	586	361	225	154	168	506	303	203	550	343	207	80	58	22	52	35	17	121.59	2.08	479	209	126
23	Quintana Roo	5	Benito Juárez	9999	Localidades de dos viviendas				267	151	116	26	18	8	69	40	29	1	220	122	98	26	42	21	21	16	193	177	100	77	49	62	154	83	71	162	92	70	23	17	6	9	7	2	130.17	2.56	174	43	20
23	Quintana Roo	6	José María Morelos	0	Total del Municipio				32746	16673	16073	3886	2000	1886	12831	6565	6266	896	28732	14611	14121	5246	8049	4126	3923	2803	22590	19787	10046	9741	6579	7860	17504	8697	8807	17373	8854	8519	2283	1349	934	1564	933	631	103.73	3.29	28381	146	67
23	Quintana Roo	6	José María Morelos	1	Adolfo de la Huerta	884945	192500	80	87	45	42	8	5	3	32	14	18	2	79	40	39	15	22	9	13	7	62	55	31	24	17	21	50	28	22	50	28	22	5	3	2	5	3	2	107.14	3.74	79	0	0
23	Quintana Roo	6	José María Morelos	3	Adolfo López Mateos	884117	193755	50	270	132	138	29	13	16	114	53	61	9	241	119	122	49	76	35	41	27	183	156	79	77	54	70	139	68	71	127	65	62	17	11	6	14	8	6	95.65	2.64	241	0	0
23	Quintana Roo	6	José María Morelos	4	La Carolina	890317	193622	90	57	31	26	5	1	4	25	11	14	1	52	30	22	10	19	9	10	9	41	32	20	12	15	11	30	19	11	28	17	11	2	1	1	2	1	1	119.23	4.58	52	0	0
23	Quintana Roo	6	José María Morelos	10	Benito Juárez	884613	194238	70	93	48	45	9	3	6	32	16	16	3	84	45	39	13	20	12	8	7	68	61	32	29	16	21	54	29	25	53	26	27	7	3	4	5	3	2	106.67	4.17	82	0	0
23	Quintana Roo	6	José María Morelos	14	Bulukax	884620	195748	30	503	264	239	63	35	28	214	106	108	12	438	228	210	80	139	66	73	59	346	287	157	130	92	103	252	139	113	249	135	114	35	18	17	24	11	13	110.46	3.59	438	0	0
23	Quintana Roo	6	José María Morelos	15	Cafetal Grande	884918	194259	20	309	148	161	31	11	20	119	53	66	11	278	137	141	47	77	38	39	30	220	190	95	95	60	73	164	81	83	171	87	84	26	14	12	19	11	8	91.93	3.65	276	0	0
23	Quintana Roo	6	José María Morelos	16	Cafetalito	884752	194337	20	236	122	114	23	12	11	92	46	46	6	212	110	102	44	63	31	32	19	162	143	76	67	49	53	123	64	59	126	69	57	20	12	8	17	10	7	107.02	4.26	208	0	0
23	Quintana Roo	6	José María Morelos	18	Candelaria	885731	194411	50	818	427	391	76	41	35	310	176	134	21	742	386	356	140	213	124	89	73	581	508	251	257	163	206	449	217	232	449	222	227	59	34	25	40	22	18	109.21	3.7	732	8	4
23	Quintana Roo	6	José María Morelos	23	La Ceiba	884610	194424	40	14	6	8	3	0	3	6	2	4	0	11	6	5	3	3	2	1	0	8	8	4	4	3	4	8	4	4	7	4	3	0	0	0	0	0	0	75	2	7	4	3
23	Quintana Roo	6	José María Morelos	24	La Ceibita	884500	193950	70	2	*	*	*	*	*	*	*	*	*	*	*	*	*	*	*	*	*	*	*	*	*	*	*	*	*	*	*	*	*	*	*	*	*	*	*	*	*	*	*	*
23	Quintana Roo	6	José María Morelos	26	El Naranjal	884702	193831	40	559	294	265	72	38	34	259	126	133	31	486	255	231	98	156	73	83	58	357	299	167	132	91	100	265	152	113	263	147	116	34	15	19	25	12	13	110.94	3.59	486	0	0
23	Quintana Roo	6	José María Morelos	27	Othón P. Blanco	890018	193715	90	503	256	247	59	31	28	210	106	104	21	444	225	219	79	130	64	66	51	344	293	150	143	93	118	257	130	127	260	136	124	36	20	16	24	13	11	103.64	4.76	444	0	0
23	Quintana Roo	6	José María Morelos	33	Javier Rojo Gómez	883536	195312	30	36	17	19	2	0	2	12	7	5	1	34	17	17	4	9	7	2	5	29	24	10	14	9	9	20	7	13	21	10	11	4	3	1	0	0	0	89.47	3.73	34	0	0
23	Quintana Roo	6	José María Morelos	35	Sabán	883219	200202	30	2058	1045	1013	283	151	132	855	441	414	59	1775	894	881	345	513	250	263	168	1371	1203	604	599	427	502	1101	544	557	1046	540	506	102	60	42	60	34	26	103.16	3.15	1773	1	1
23	Quintana Roo	6	José María Morelos	36	Sabana San Francisco	890438	193253	80	143	77	66	17	12	5	57	29	28	5	126	65	61	28	35	15	20	7	93	86	48	38	26	33	77	39	38	77	43	34	9	9	0	6	6	0	116.67	3.31	126	0	0
23	Quintana Roo	6	José María Morelos	38	Saczuquil	885841	194706	50	399	210	189	29	16	13	139	69	70	13	370	194	176	60	97	47	50	37	297	260	141	119	75	97	225	116	109	236	127	109	35	25	10	25	18	7	111.11	3.23	369	0	0
23	Quintana Roo	6	José María Morelos	39	San Carlos	885618	193757	60	104	59	45	18	9	9	41	22	19	1	86	50	36	13	22	12	10	9	72	63	37	26	17	21	55	32	23	57	35	22	8	5	3	7	4	3	131.11	3.65	86	0	0
23	Quintana Roo	6	José María Morelos	40	San Diego	884348	195046	20	533	278	255	66	33	33	200	103	97	17	467	245	222	76	117	62	55	41	374	333	175	158	118	121	283	146	137	288	152	136	50	29	21	35	22	13	109.02	3.34	463	0	0
23	Quintana Roo	6	José María Morelos	42	San Isidro	884255	192819	70	1	*	*	*	*	*	*	*	*	*	*	*	*	*	*	*	*	*	*	*	*	*	*	*	*	*	*	*	*	*	*	*	*	*	*	*	*	*	*	*	*
23	Quintana Roo	6	José María Morelos	48	Dos Aguadas	884157	193959	80	192	97	95	20	8	12	80	34	46	8	172	89	83	35	52	23	29	17	129	112	63	49	32	41	100	55	45	103	58	45	12	8	4	6	5	1	102.11	3.78	172	0	0
23	Quintana Roo	6	José María Morelos	51	Dziuché	884825	195352	90	2728	1379	1349	306	161	145	1001	534	467	64	2415	1216	1199	395	631	344	287	236	1956	1720	843	877	469	657	1464	699	765	1559	763	796	256	144	112	175	108	67	102.22	3.14	2361	18	6
23	Quintana Roo	6	José María Morelos	57	La Esperanza	883508	195149	30	609	298	311	67	31	36	265	132	133	25	542	267	275	112	173	88	85	61	405	344	166	178	123	148	309	142	167	297	144	153	35	24	11	23	16	7	95.82	3.93	540	2	2
23	Quintana Roo	6	José María Morelos	61	Gavilanes	884513	192929	80	249	127	122	26	12	14	99	48	51	6	223	115	108	53	67	34	33	14	164	150	79	71	44	55	132	68	64	137	72	65	18	11	7	12	9	3	104.1	3.57	222	0	0
23	Quintana Roo	6	José María Morelos	67	Huay Max	883131	200228	30	1133	592	541	160	74	86	482	249	233	43	972	518	454	188	279	150	129	91	741	650	343	307	242	242	586	313	273	559	295	264	64	30	34	44	18	26	109.43	3.77	972	0	0
23	Quintana Roo	6	José María Morelos	69	José María Morelos	884245	194446	30	10424	5151	5273	1199	629	570	3935	2005	1930	236	9180	4499	4681	1621	2500	1265	1235	879	7323	6444	3123	3321	2223	2735	5796	2745	3051	5605	2713	2892	648	378	270	461	261	200	97.69	3.04	8974	97	43
23	Quintana Roo	6	José María Morelos	70	X-Querol	883658	200753	30	85	46	39	12	5	7	36	18	18	4	72	40	32	12	20	11	9	8	56	48	27	21	18	17	41	23	18	42	23	19	7	4	3	7	4	3	117.95	4.48	72	0	0
23	Quintana Roo	6	José María Morelos	71	Zafarrancho	885320	193050	80	313	163	150	45	23	22	151	80	71	8	267	140	127	64	98	55	43	34	195	161	83	78	70	65	148	74	74	136	72	64	13	9	4	8	6	2	108.67	3.66	264	1	0
23	Quintana Roo	6	José María Morelos	76	Kantemó	884821	195548	30	193	100	93	22	13	9	79	36	43	5	169	86	83	31	52	21	31	21	133	112	63	49	30	37	98	52	46	102	58	44	14	11	3	9	7	2	107.53	3.47	169	0	0
23	Quintana Roo	6	José María Morelos	90	Lázaro Cárdenas	884228	193538	80	125	66	59	17	8	9	55	25	30	2	108	58	50	24	36	16	20	12	82	70	41	29	25	26	62	34	28	63	37	26	8	7	1	6	5	1	111.86	3.42	108	0	0
23	Quintana Roo	6	José María Morelos	99	Mariano Matamoros	884506	193800	90	44	22	22	5	3	2	20	7	13	1	39	19	20	11	14	4	10	3	27	24	15	9	8	6	19	11	8	18	10	8	5	4	1	2	1	1	100	5.25	39	0	0
23	Quintana Roo	6	José María Morelos	100	El Martirio	885007	193829	60	71	38	33	10	6	4	29	16	13	3	61	32	29	11	16	9	7	5	47	42	22	20	14	17	35	17	18	38	20	18	7	5	2	5	4	1	115.15	3.15	59	0	0
23	Quintana Roo	6	José María Morelos	117	Pedro Moreno	884414	193159	100	87	38	49	11	8	3	38	13	25	5	76	30	46	14	22	4	18	8	57	49	25	24	16	21	42	20	22	46	22	24	7	5	2	3	3	0	77.55	3.19	76	0	0
23	Quintana Roo	6	José María Morelos	121	Piedras Negras	884749	192618	100	89	45	44	12	5	7	30	14	16	4	77	40	37	9	14	8	6	5	64	59	31	28	20	21	48	24	24	55	28	27	11	7	4	5	3	2	102.27	3.57	77	0	0
23	Quintana Roo	6	José María Morelos	130	Pozo Pirata	885324	193654	80	190	101	89	27	15	12	77	47	30	3	162	86	76	28	47	30	17	19	131	112	54	58	44	50	103	48	55	103	51	52	9	6	3	5	4	1	113.48	2.75	162	0	0
23	Quintana Roo	6	José María Morelos	133	La Presumida	884514	194803	30	1171	590	581	148	82	66	432	216	216	26	1021	507	514	172	258	118	140	86	823	737	373	364	226	286	653	324	329	662	334	328	84	49	35	67	39	28	101.55	3.05	1016	0	0
23	Quintana Roo	6	José María Morelos	135	Puerto Arturo	890401	193933	90	549	301	248	62	27	35	209	115	94	16	487	274	213	89	131	82	49	42	382	340	186	154	116	129	303	165	138	308	168	140	37	21	16	19	9	10	121.37	3.4	486	0	0
23	Quintana Roo	6	José María Morelos	141	Nueva Reforma	885128	194756	40	297	154	143	30	15	15	104	54	50	9	267	139	128	41	65	34	31	24	217	193	100	93	79	74	177	90	87	163	83	80	16	10	6	12	8	4	107.69	2.9	263	0	0
23	Quintana Roo	6	José María Morelos	146	Sacalaca	883542	200343	30	1026	516	510	102	51	51	407	195	212	28	923	465	458	177	277	134	143	100	718	618	321	297	183	231	544	282	262	536	277	259	74	39	35	44	23	21	101.18	3.72	922	1	0
23	Quintana Roo	6	José María Morelos	153	San Antonio Tuk	883248	194656	30	158	83	75	26	8	18	76	35	41	7	132	75	57	29	43	24	19	14	96	82	48	34	30	27	69	38	31	68	41	27	13	10	3	6	5	1	110.67	4	132	0	0
23	Quintana Roo	6	José María Morelos	167	San Felipe Primero	884958	194846	30	655	356	299	72	43	29	236	140	96	15	583	313	270	93	149	93	56	56	475	419	216	203	167	168	377	191	186	369	196	173	42	25	17	29	19	10	119.06	3.07	577	0	0
23	Quintana Roo	6	José María Morelos	168	San Felipe Segundo	885328	194938	40	185	100	85	30	14	16	83	46	37	9	155	86	69	30	44	24	20	14	116	102	54	48	45	39	91	48	43	87	46	41	11	6	5	3	1	2	117.65	3.55	145	6	3
23	Quintana Roo	6	José María Morelos	170	San Felipe Oriente	883735	195831	30	208	111	97	25	11	14	88	43	45	5	183	100	83	37	58	30	28	21	141	120	68	52	44	41	106	59	47	103	58	45	14	9	5	14	9	5	114.43	3.61	182	1	0
23	Quintana Roo	6	José María Morelos	185	San José de la Montaña	883639	194831	40	2	*	*	*	*	*	*	*	*	*	*	*	*	*	*	*	*	*	*	*	*	*	*	*	*	*	*	*	*	*	*	*	*	*	*	*	*	*	*	*	*
23	Quintana Roo	6	José María Morelos	195	Nuevo San Marcos	884644	195032	30	155	80	75	24	13	11	63	32	31	2	131	67	64	25	37	17	20	12	104	92	48	44	24	32	79	40	39	85	44	41	13	8	5	9	6	3	106.67	3.1	131	0	0
23	Quintana Roo	6	José María Morelos	217	Santa Gertrudis	884621	194800	30	717	363	354	67	39	28	256	143	113	20	650	324	326	115	169	97	72	54	515	461	220	241	160	191	401	192	209	400	193	207	60	28	32	42	20	22	102.54	2.81	650	0	0
23	Quintana Roo	6	José María Morelos	235	Santo Domingo	884244	194730	20	24	14	10	2	1	1	5	3	2	0	22	13	9	3	3	2	1	0	19	19	11	8	9	6	17	10	7	17	10	7	2	1	1	2	1	1	140	2.75	22	0	0
23	Quintana Roo	6	José María Morelos	241	Tabasco	884106	195843	30	259	138	121	28	13	15	94	49	45	6	231	125	106	42	60	35	25	18	183	165	89	76	50	62	137	70	67	145	80	65	28	19	9	18	13	5	114.05	3.24	231	0	0
23	Quintana Roo	6	José María Morelos	272	X-Cabil	882750	200954	30	1043	536	507	156	73	83	423	209	214	26	887	463	424	163	241	123	118	78	698	620	327	293	210	234	555	289	266	544	290	254	65	38	27	37	20	17	105.72	3.52	884	0	0
23	Quintana Roo	6	José María Morelos	278	Kancabchén	885142	194250	100	1035	505	530	124	57	67	431	206	225	38	911	448	463	165	269	128	141	104	708	604	299	305	190	241	520	255	265	532	266	266	84	44	40	62	36	26	95.28	3.34	906	0	0
23	Quintana Roo	6	José María Morelos	287	Insurgentes	884709	193535	90	63	32	31	11	5	6	31	12	19	2	52	27	25	12	18	6	12	6	38	32	20	12	9	10	27	17	10	30	19	11	5	3	2	3	2	1	103.23	2.88	51	0	0
23	Quintana Roo	6	José María Morelos	296	Plan de la Noria Poniente	884714	191834	90	251	144	107	36	20	16	109	64	45	7	215	124	91	49	66	39	27	17	159	142	80	62	50	52	126	68	58	126	69	57	16	12	4	13	10	3	134.58	3.68	210	4	3
23	Quintana Roo	6	José María Morelos	300	Rancho Viejo	883239	195441	30	45	24	21	4	1	3	20	6	14	2	41	23	18	10	14	5	9	4	29	25	18	7	6	6	20	13	7	20	13	7	5	5	0	3	3	0	114.29	6	41	0	0
23	Quintana Roo	6	José María Morelos	308	San Isidro Poniente	885318	191948	90	191	98	93	24	14	10	87	40	47	6	166	84	82	38	57	25	32	19	122	103	58	45	26	35	86	49	37	87	50	37	17	9	8	9	6	3	105.38	4.02	165	0	0
23	Quintana Roo	6	José María Morelos	330	El Triunfo	884552	192532	70	150	80	70	19	8	11	83	46	37	10	130	71	59	39	54	30	24	15	81	66	33	33	15	28	55	24	31	56	30	26	11	9	2	7	6	1	114.29	3.53	130	0	0
23	Quintana Roo	6	José María Morelos	331	Venustiano Carranza	884523	191628	80	177	99	78	21	13	8	69	37	32	5	156	86	70	25	43	22	21	18	126	108	62	46	46	38	95	51	44	94	55	39	13	11	2	9	7	2	126.92	3.49	156	0	0
23	Quintana Roo	6	José María Morelos	336	Colmenitas	884642	193014	90	33	16	17	5	3	2	12	7	5	1	28	13	15	3	6	3	3	3	24	21	9	12	8	11	19	8	11	19	8	11	2	1	1	2	1	1	94.12	2.46	28	0	0
23	Quintana Roo	6	José María Morelos	346	Juanas	890317	193030	100	1	*	*	*	*	*	*	*	*	*	*	*	*	*	*	*	*	*	*	*	*	*	*	*	*	*	*	*	*	*	*	*	*	*	*	*	*	*	*	*	*
23	Quintana Roo	6	José María Morelos	348	Kilómetro Cuarenta	884553	194917	30	1	*	*	*	*	*	*	*	*	*	*	*	*	*	*	*	*	*	*	*	*	*	*	*	*	*	*	*	*	*	*	*	*	*	*	*	*	*	*	*	*
23	Quintana Roo	6	José María Morelos	351	La Coqueta	884840	194801	30	2	*	*	*	*	*	*	*	*	*	*	*	*	*	*	*	*	*	*	*	*	*	*	*	*	*	*	*	*	*	*	*	*	*	*	*	*	*	*	*	*
23	Quintana Roo	6	José María Morelos	353	Las Palmas	884541	194857	30	2	*	*	*	*	*	*	*	*	*	*	*	*	*	*	*	*	*	*	*	*	*	*	*	*	*	*	*	*	*	*	*	*	*	*	*	*	*	*	*	*
23	Quintana Roo	6	José María Morelos	357	La Pimientita	884011	193015	70	247	133	114	30	17	13	105	54	51	13	217	116	101	47	62	29	33	15	157	142	79	63	49	55	129	70	59	118	66	52	13	9	4	7	6	1	116.67	3.13	217	0	0
23	Quintana Roo	6	José María Morelos	362	San Agustín	884222	195216	30	2	*	*	*	*	*	*	*	*	*	*	*	*	*	*	*	*	*	*	*	*	*	*	*	*	*	*	*	*	*	*	*	*	*	*	*	*	*	*	*	*
23	Quintana Roo	6	José María Morelos	368	San Eustaquio	884609	194907	30	5	*	*	*	*	*	*	*	*	*	*	*	*	*	*	*	*	*	*	*	*	*	*	*	*	*	*	*	*	*	*	*	*	*	*	*	*	*	*	*	*
23	Quintana Roo	6	José María Morelos	378	San Juan Oriente	883637	200110	30	135	77	58	15	10	5	56	34	22	4	103	58	45	21	37	22	15	16	78	62	34	28	14	20	49	25	24	55	31	24	13	9	4	5	4	1	132.76	4.13	103	0	0
23	Quintana Roo	6	José María Morelos	383	San Nicolás	884541	194846	30	2	*	*	*	*	*	*	*	*	*	*	*	*	*	*	*	*	*	*	*	*	*	*	*	*	*	*	*	*	*	*	*	*	*	*	*	*	*	*	*	*
23	Quintana Roo	6	José María Morelos	387	San Román	883344	195508	30	1	*	*	*	*	*	*	*	*	*	*	*	*	*	*	*	*	*	*	*	*	*	*	*	*	*	*	*	*	*	*	*	*	*	*	*	*	*	*	*	*
23	Quintana Roo	6	José María Morelos	393	Santa Amalia	884150	194110	60	2	*	*	*	*	*	*	*	*	*	*	*	*	*	*	*	*	*	*	*	*	*	*	*	*	*	*	*	*	*	*	*	*	*	*	*	*	*	*	*	*
23	Quintana Roo	6	José María Morelos	395	Santa Cruz	884658	195717	40	1	*	*	*	*	*	*	*	*	*	*	*	*	*	*	*	*	*	*	*	*	*	*	*	*	*	*	*	*	*	*	*	*	*	*	*	*	*	*	*	*
23	Quintana Roo	6	José María Morelos	396	Santa Elena	883555	200632	30	8	*	*	*	*	*	*	*	*	*	*	*	*	*	*	*	*	*	*	*	*	*	*	*	*	*	*	*	*	*	*	*	*	*	*	*	*	*	*	*	*
23	Quintana Roo	6	José María Morelos	412	Xnoh Cruz	891010	193631	70	154	78	76	17	8	9	58	30	28	2	137	70	67	26	39	20	19	13	109	96	48	48	35	42	88	43	45	83	43	40	8	5	3	7	4	3	102.63	2.96	136	0	0
23	Quintana Roo	6	José María Morelos	414	Nuevo Plan de la Noria	883820	191713	70	228	123	105	31	19	12	97	54	43	4	197	104	93	43	62	33	29	19	150	131	69	62	40	52	115	59	56	121	64	57	16	10	6	13	7	6	117.14	3.65	197	0	0
23	Quintana Roo	6	José María Morelos	424	Monte Grande	885053	193033	70	4	*	*	*	*	*	*	*	*	*	*	*	*	*	*	*	*	*	*	*	*	*	*	*	*	*	*	*	*	*	*	*	*	*	*	*	*	*	*	*	*
23	Quintana Roo	6	José María Morelos	425	Aguada la Presumida	890113	192634	80	63	34	29	14	3	11	37	15	22	2	49	31	18	14	21	12	9	7	33	26	19	7	6	6	20	14	6	23	16	7	6	5	1	5	5	0	117.24	4.71	44	0	0
23	Quintana Roo	6	José María Morelos	427	San Antonio Zuctuk	884912	194854	30	1	*	*	*	*	*	*	*	*	*	*	*	*	*	*	*	*	*	*	*	*	*	*	*	*	*	*	*	*	*	*	*	*	*	*	*	*	*	*	*	*
23	Quintana Roo	6	José María Morelos	428	Adriana	884857	194822	30	3	*	*	*	*	*	*	*	*	*	*	*	*	*	*	*	*	*	*	*	*	*	*	*	*	*	*	*	*	*	*	*	*	*	*	*	*	*	*	*	*
23	Quintana Roo	6	José María Morelos	430	El Verdón	885948	194106	90	5	*	*	*	*	*	*	*	*	*	*	*	*	*	*	*	*	*	*	*	*	*	*	*	*	*	*	*	*	*	*	*	*	*	*	*	*	*	*	*	*
23	Quintana Roo	6	José María Morelos	431	Santa Margarita	885407	193748	60	6	*	*	*	*	*	*	*	*	*	*	*	*	*	*	*	*	*	*	*	*	*	*	*	*	*	*	*	*	*	*	*	*	*	*	*	*	*	*	*	*
23	Quintana Roo	6	José María Morelos	441	Nuevo Cunduacán	885200	191613	100	12	7	5	1	0	1	1	0	1	0	11	7	4	0	0	0	0	0	11	11	7	4	2	4	8	4	4	10	7	3	3	3	0	2	2	0	140	3	11	0	0
23	Quintana Roo	6	José María Morelos	445	San Juan	884355	194653	20	2	*	*	*	*	*	*	*	*	*	*	*	*	*	*	*	*	*	*	*	*	*	*	*	*	*	*	*	*	*	*	*	*	*	*	*	*	*	*	*	*
23	Quintana Roo	6	José María Morelos	446	La Voluntad de Dios	884333	194722	30	11	5	6	1	1	0	3	2	1	0	10	4	6	1	2	1	1	1	9	8	3	5	4	5	7	2	5	6	3	3	1	1	0	1	1	0	83.33	0.83	10	0	0
23	Quintana Roo	6	José María Morelos	455	San Nicolás	884557	194849	30	4	*	*	*	*	*	*	*	*	*	*	*	*	*	*	*	*	*	*	*	*	*	*	*	*	*	*	*	*	*	*	*	*	*	*	*	*	*	*	*	*
23	Quintana Roo	6	José María Morelos	463	Las Moras	885938	192706	90	1	*	*	*	*	*	*	*	*	*	*	*	*	*	*	*	*	*	*	*	*	*	*	*	*	*	*	*	*	*	*	*	*	*	*	*	*	*	*	*	*
23	Quintana Roo	6	José María Morelos	471	San Salvador	885155	192753	90	5	*	*	*	*	*	*	*	*	*	*	*	*	*	*	*	*	*	*	*	*	*	*	*	*	*	*	*	*	*	*	*	*	*	*	*	*	*	*	*	*
23	Quintana Roo	6	José María Morelos	474	Camarones	885104	192955	100	10	*	*	*	*	*	*	*	*	*	*	*	*	*	*	*	*	*	*	*	*	*	*	*	*	*	*	*	*	*	*	*	*	*	*	*	*	*	*	*	*
23	Quintana Roo	6	José María Morelos	490	San Lorenzo	884558	194805	30	3	*	*	*	*	*	*	*	*	*	*	*	*	*	*	*	*	*	*	*	*	*	*	*	*	*	*	*	*	*	*	*	*	*	*	*	*	*	*	*	*
23	Quintana Roo	6	José María Morelos	493	San Luis	885048	194803	30	2	*	*	*	*	*	*	*	*	*	*	*	*	*	*	*	*	*	*	*	*	*	*	*	*	*	*	*	*	*	*	*	*	*	*	*	*	*	*	*	*
23	Quintana Roo	6	José María Morelos	508	Chantuk Águilas	883235	195344	30	1	*	*	*	*	*	*	*	*	*	*	*	*	*	*	*	*	*	*	*	*	*	*	*	*	*	*	*	*	*	*	*	*	*	*	*	*	*	*	*	*
23	Quintana Roo	6	José María Morelos	519	Los Lagartos	885836	192700	90	39	20	19	0	0	0	0	0	0	0	0	0	0	0	0	0	0	0	0	0	0	0	0	0	0	0	0	0	0	0	0	0	0	0	0	0	105.26	*	0	0	0
23	Quintana Roo	6	José María Morelos	520	Los Lagartos	885321	192704	100	36	25	11	8	6	2	17	14	3	1	28	19	9	5	8	7	1	3	22	19	11	8	6	7	16	9	7	16	9	7	3	2	1	3	2	1	227.27	5.43	26	0	0
23	Quintana Roo	6	José María Morelos	532	San Francisco	884045	195951	30	2	*	*	*	*	*	*	*	*	*	*	*	*	*	*	*	*	*	*	*	*	*	*	*	*	*	*	*	*	*	*	*	*	*	*	*	*	*	*	*	*
23	Quintana Roo	6	José María Morelos	545	San Salvador	885234	195112	30	6	*	*	*	*	*	*	*	*	*	*	*	*	*	*	*	*	*	*	*	*	*	*	*	*	*	*	*	*	*	*	*	*	*	*	*	*	*	*	*	*
23	Quintana Roo	6	José María Morelos	546	San Valerio	883601	195549	30	1	*	*	*	*	*	*	*	*	*	*	*	*	*	*	*	*	*	*	*	*	*	*	*	*	*	*	*	*	*	*	*	*	*	*	*	*	*	*	*	*
23	Quintana Roo	6	José María Morelos	560	Rancho Guadalupe	884524	194826	30	3	*	*	*	*	*	*	*	*	*	*	*	*	*	*	*	*	*	*	*	*	*	*	*	*	*	*	*	*	*	*	*	*	*	*	*	*	*	*	*	*
23	Quintana Roo	6	José María Morelos	566	Chan Tabasquito	884220	195850	30	3	*	*	*	*	*	*	*	*	*	*	*	*	*	*	*	*	*	*	*	*	*	*	*	*	*	*	*	*	*	*	*	*	*	*	*	*	*	*	*	*
23	Quintana Roo	6	José María Morelos	593	San Luis	884713	193555	90	6	*	*	*	*	*	*	*	*	*	*	*	*	*	*	*	*	*	*	*	*	*	*	*	*	*	*	*	*	*	*	*	*	*	*	*	*	*	*	*	*
23	Quintana Roo	6	José María Morelos	596	San Pedro	884054	195958	30	1	*	*	*	*	*	*	*	*	*	*	*	*	*	*	*	*	*	*	*	*	*	*	*	*	*	*	*	*	*	*	*	*	*	*	*	*	*	*	*	*
23	Quintana Roo	6	José María Morelos	608	Villa de Guadalupe	884230	194942	30	6	*	*	*	*	*	*	*	*	*	*	*	*	*	*	*	*	*	*	*	*	*	*	*	*	*	*	*	*	*	*	*	*	*	*	*	*	*	*	*	*
23	Quintana Roo	6	José María Morelos	613	La Estrella	890424	193426	80	1	*	*	*	*	*	*	*	*	*	*	*	*	*	*	*	*	*	*	*	*	*	*	*	*	*	*	*	*	*	*	*	*	*	*	*	*	*	*	*	*
23	Quintana Roo	6	José María Morelos	616	El Lucero Dos	885540	193753	60	7	*	*	*	*	*	*	*	*	*	*	*	*	*	*	*	*	*	*	*	*	*	*	*	*	*	*	*	*	*	*	*	*	*	*	*	*	*	*	*	*
23	Quintana Roo	6	José María Morelos	639	Dos Aguadas	890638	194127	70	46	25	21	9	6	3	25	13	12	0	37	19	18	14	16	7	9	2	23	21	12	9	5	8	17	9	8	20	11	9	4	3	1	4	3	1	119.05	4.82	37	0	0
23	Quintana Roo	6	José María Morelos	644	Localidad sin Nombre	883504	194735	50	1	*	*	*	*	*	*	*	*	*	*	*	*	*	*	*	*	*	*	*	*	*	*	*	*	*	*	*	*	*	*	*	*	*	*	*	*	*	*	*	*
23	Quintana Roo	6	José María Morelos	650	Chan X-Cunei	884146	200027	40	1	*	*	*	*	*	*	*	*	*	*	*	*	*	*	*	*	*	*	*	*	*	*	*	*	*	*	*	*	*	*	*	*	*	*	*	*	*	*	*	*
23	Quintana Roo	6	José María Morelos	652	Localidad sin Nombre	884431	194917	30	3	*	*	*	*	*	*	*	*	*	*	*	*	*	*	*	*	*	*	*	*	*	*	*	*	*	*	*	*	*	*	*	*	*	*	*	*	*	*	*	*
23	Quintana Roo	6	José María Morelos	653	Santa Patricia	884408	194913	30	1	*	*	*	*	*	*	*	*	*	*	*	*	*	*	*	*	*	*	*	*	*	*	*	*	*	*	*	*	*	*	*	*	*	*	*	*	*	*	*	*
23	Quintana Roo	6	José María Morelos	654	X-Cunei	884141	200043	40	1	*	*	*	*	*	*	*	*	*	*	*	*	*	*	*	*	*	*	*	*	*	*	*	*	*	*	*	*	*	*	*	*	*	*	*	*	*	*	*	*
23	Quintana Roo	6	José María Morelos	655	San Eustaquio	885000	194918	30	7	*	*	*	*	*	*	*	*	*	*	*	*	*	*	*	*	*	*	*	*	*	*	*	*	*	*	*	*	*	*	*	*	*	*	*	*	*	*	*	*
23	Quintana Roo	6	José María Morelos	9998	Localidades de una vivienda				101	68	33	7	5	2	12	9	3	0	89	61	28	3	5	4	1	2	86	84	57	27	16	14	49	31	18	80	54	26	35	26	9	23	20	3	206.06	5.07	86	3	2
23	Quintana Roo	6	José María Morelos	9999	Localidades de dos viviendas				28	16	12	5	2	3	8	4	4	0	23	14	9	3	3	2	1	0	20	20	12	8	6	5	14	8	6	19	11	8	6	4	2	5	3	2	133.33	4.75	23	0	0
23	Quintana Roo	7	Lázaro Cárdenas	0	Total del Municipio				22434	11517	10917	2426	1256	1170	7740	3916	3824	595	19149	9831	9318	3138	4719	2352	2367	1581	15416	13835	7171	6664	4191	5356	12233	6262	5971	12409	6444	5965	1602	909	693	1101	645	456	105.5	2.85	18864	211	99
23	Quintana Roo	7	Lázaro Cárdenas	1	Kantunilkín	872916	210610	15	6383	3254	3129	687	346	341	2153	1065	1088	173	5647	2883	2764	855	1293	638	655	438	4619	4181	2164	2017	1230	1639	3720	1907	1813	3758	1946	1812	461	257	204	333	195	138	103.99	2.79	5538	75	37
23	Quintana Roo	7	Lázaro Cárdenas	2	Agua Azul	871932	205129	20	364	179	185	41	18	23	136	64	72	14	323	161	162	52	81	39	42	29	257	228	115	113	82	94	202	103	99	206	104	102	26	12	14	19	9	10	96.76	2.88	322	0	0
23	Quintana Roo	7	Lázaro Cárdenas	5	El Cedral	873304	205703	20	672	340	332	72	37	35	244	122	122	16	598	302	296	97	156	74	82	59	485	426	217	209	161	164	372	191	181	366	188	178	54	26	28	34	20	14	102.41	3.03	594	1	0
23	Quintana Roo	7	Lázaro Cárdenas	6	Cedralito Segundo	873300	205353	20	7	*	*	*	*	*	*	*	*	*	*	*	*	*	*	*	*	*	*	*	*	*	*	*	*	*	*	*	*	*	*	*	*	*	*	*	*	*	*	*	*
23	Quintana Roo	7	Lázaro Cárdenas	7	Cristóbal Colón	872045	205609	20	348	167	181	39	19	20	128	59	69	10	308	148	160	54	79	34	45	25	244	219	108	111	74	95	198	99	99	195	100	95	21	9	12	17	9	8	92.27	2.31	304	4	3
23	Quintana Roo	7	Lázaro Cárdenas	8	Chiquilá	872017	212532	5	1285	665	620	150	78	72	489	249	240	43	1133	586	547	205	296	148	148	91	885	794	415	379	239	321	727	378	349	716	376	340	67	37	30	47	30	17	107.26	2.97	1092	40	21
23	Quintana Roo	7	Lázaro Cárdenas	9	Delirios	871132	205048	20	64	37	27	13	10	3	36	23	13	1	51	27	24	12	22	13	9	10	38	28	14	14	8	11	23	11	12	25	14	11	5	3	2	3	2	1	137.04	4	51	0	0
23	Quintana Roo	7	Lázaro Cárdenas	10	Esperanza	872351	205819	20	349	185	164	47	27	20	144	77	67	9	299	157	142	62	88	44	44	26	228	202	107	95	67	79	184	95	89	179	95	84	18	12	6	13	9	4	112.8	2.93	299	0	0
23	Quintana Roo	7	Lázaro Cárdenas	12	Holbox	872236	213118	10	1198	604	594	118	60	58	361	176	185	23	1080	544	536	150	220	107	113	70	907	837	428	409	170	319	734	372	362	783	402	381	103	56	47	69	38	31	101.68	2.35	1020	55	25
23	Quintana Roo	7	Lázaro Cárdenas	13	El Ideal	873242	205255	20	717	370	347	75	41	34	256	137	119	23	631	325	306	98	158	84	74	60	510	450	229	221	158	171	396	202	194	402	201	201	54	27	27	32	16	16	106.63	2.88	612	15	7
23	Quintana Roo	7	Lázaro Cárdenas	14	Juárez	871943	204924	20	195	102	93	24	14	10	81	43	38	6	171	88	83	36	51	25	26	15	129	114	59	55	28	46	99	49	50	100	51	49	15	10	5	10	7	3	109.68	2.86	167	4	2
23	Quintana Roo	7	Lázaro Cárdenas	15	El Naranjal	872834	204816	20	99	53	46	10	8	2	38	20	18	4	89	45	44	18	24	12	12	6	67	61	33	28	10	23	50	24	26	58	33	25	11	9	2	9	7	2	115.22	2.89	89	0	0
23	Quintana Roo	7	Lázaro Cárdenas	17	Nuevo Durango	873502	204319	20	199	101	98	37	22	15	77	41	36	3	158	77	81	24	37	18	19	13	131	118	58	60	40	45	100	47	53	106	51	55	18	11	7	13	8	5	103.06	3.51	158	0	0
23	Quintana Roo	7	Lázaro Cárdenas	18	Nuevo Xcán	873611	205209	20	955	499	456	91	47	44	296	155	141	19	862	451	411	127	186	98	88	59	716	657	343	314	174	238	572	293	279	596	308	288	85	50	35	60	34	26	109.43	2.76	852	6	2
23	Quintana Roo	7	Lázaro Cárdenas	21	El Pocito	872855	205327	20	132	71	61	18	11	7	46	28	18	2	114	60	54	16	26	15	11	10	96	86	43	43	22	32	76	36	40	82	39	43	10	7	3	7	4	3	116.39	3.41	114	0	0
23	Quintana Roo	7	Lázaro Cárdenas	22	Quintana	873715	211050	20	24	12	12	2	2	0	11	5	6	0	21	10	11	6	9	3	6	3	15	12	7	5	3	4	11	6	5	11	6	5	1	1	0	1	1	0	100	3.33	21	0	0
23	Quintana Roo	7	Lázaro Cárdenas	23	San Ángel	872600	211402	10	931	481	450	108	50	58	351	170	181	22	823	431	392	145	221	108	113	76	656	580	311	269	175	217	508	266	242	513	271	242	72	45	27	50	33	17	106.89	3.08	821	1	0
23	Quintana Roo	7	Lázaro Cárdenas	25	San Cosme	873017	204830	20	340	179	161	51	29	22	127	68	59	8	289	150	139	47	68	35	33	21	234	213	111	102	85	86	198	102	96	183	95	88	15	9	6	11	6	5	111.18	2.72	288	0	0
23	Quintana Roo	7	Lázaro Cárdenas	26	San Eusebio	872009	212354	5	44	22	22	0	0	0	0	0	0	0	0	0	0	0	0	0	0	0	0	0	0	0	0	0	0	0	0	0	0	0	0	0	0	0	0	0	100	*	0	0	0
23	Quintana Roo	7	Lázaro Cárdenas	27	San Felipe	872350	205501	20	17	*	*	*	*	*	*	*	*	*	*	*	*	*	*	*	*	*	*	*	*	*	*	*	*	*	*	*	*	*	*	*	*	*	*	*	*	*	*	*	*
23	Quintana Roo	7	Lázaro Cárdenas	28	San Francisco	873017	204916	20	692	336	356	79	36	43	259	117	142	23	611	298	313	97	157	69	88	60	491	431	217	214	135	178	384	187	197	388	201	187	47	30	17	27	18	9	94.38	2.65	609	0	0
23	Quintana Roo	7	Lázaro Cárdenas	30	San Juan de Dios	873256	204610	20	345	193	152	32	21	11	132	75	57	12	313	172	141	65	88	47	41	23	236	213	118	95	63	75	184	101	83	195	111	84	29	17	12	12	8	4	126.97	3.07	313	0	0
23	Quintana Roo	7	Lázaro Cárdenas	31	San Lorenzo	871532	205052	20	178	100	78	20	14	6	67	40	27	4	157	85	72	29	43	23	20	14	124	110	59	51	33	42	97	52	45	99	52	47	13	7	6	5	4	1	128.21	3.02	157	0	0
23	Quintana Roo	7	Lázaro Cárdenas	32	San Luis	872646	205114	20	49	24	25	0	0	0	0	0	0	0	0	0	0	0	0	0	0	0	0	0	0	0	0	0	0	0	0	0	0	0	0	0	0	0	0	0	96	*	0	0	0
23	Quintana Roo	7	Lázaro Cárdenas	33	San Martiniano	871654	204944	20	208	103	105	37	18	19	96	48	48	8	171	85	86	37	51	27	24	14	126	112	55	57	33	46	98	47	51	97	51	46	14	8	6	7	4	3	98.1	3.35	169	0	0
23	Quintana Roo	7	Lázaro Cárdenas	35	San Román	872750	205136	20	103	61	42	13	9	4	38	21	17	2	90	52	38	14	23	12	11	9	74	65	40	25	26	17	53	32	21	54	32	22	12	8	4	8	6	2	145.24	3.22	90	0	0
23	Quintana Roo	7	Lázaro Cárdenas	38	Solferino	872544	212108	10	810	423	387	74	37	37	261	133	128	20	735	385	350	117	167	83	84	50	598	548	289	259	157	197	472	250	222	486	257	229	76	39	37	57	30	27	109.3	3.08	733	0	0
23	Quintana Roo	7	Lázaro Cárdenas	39	El Tintal	872758	205331	20	833	418	415	101	50	51	328	163	165	31	732	368	364	143	196	97	99	53	558	505	255	250	187	204	460	229	231	444	228	216	45	26	19	33	17	16	100.72	2.93	729	1	1
23	Quintana Roo	7	Lázaro Cárdenas	40	Tres Reyes	873539	204140	20	349	184	165	36	16	20	127	63	64	9	313	168	145	52	82	42	40	30	252	222	121	101	59	82	194	103	91	195	108	87	28	18	10	16	12	4	111.52	3.09	313	0	0
23	Quintana Roo	7	Lázaro Cárdenas	41	Nuevo Valladolid	871933	205642	20	1149	591	558	69	34	35	220	123	97	18	525	280	245	94	133	75	58	39	413	374	191	183	124	148	327	166	161	342	175	167	47	25	22	36	19	17	105.91	2.82	524	0	0
23	Quintana Roo	7	Lázaro Cárdenas	42	Guadalupe Victoria	871644	204724	20	53	27	26	0	0	0	0	0	0	0	0	0	0	0	0	0	0	0	0	0	0	0	0	0	0	0	0	0	0	0	0	0	0	0	0	0	103.85	*	0	0	0
23	Quintana Roo	7	Lázaro Cárdenas	43	Ignacio Zaragoza	873130	205254	20	2057	1056	1001	216	112	104	774	399	375	60	1839	942	897	319	498	251	247	179	1460	1281	655	626	405	502	1136	571	565	1149	591	558	145	84	61	99	54	45	105.49	2.76	1831	6	1
23	Quintana Roo	7	Lázaro Cárdenas	46	Cedralito	873250	205449	20	20	11	9	3	1	2	8	5	3	0	17	10	7	2	5	4	1	3	15	12	6	6	4	5	10	5	5	10	5	5	2	1	1	0	0	0	122.22	3.29	17	0	0
23	Quintana Roo	7	Lázaro Cárdenas	52	La Ermita	873259	205556	20	6	*	*	*	*	*	*	*	*	*	*	*	*	*	*	*	*	*	*	*	*	*	*	*	*	*	*	*	*	*	*	*	*	*	*	*	*	*	*	*	*
23	Quintana Roo	7	Lázaro Cárdenas	55	La Hoyanca de Fátima	873049	205605	20	4	*	*	*	*	*	*	*	*	*	*	*	*	*	*	*	*	*	*	*	*	*	*	*	*	*	*	*	*	*	*	*	*	*	*	*	*	*	*	*	*
23	Quintana Roo	7	Lázaro Cárdenas	61	San Casimiro	872345	205502	20	5	*	*	*	*	*	*	*	*	*	*	*	*	*	*	*	*	*	*	*	*	*	*	*	*	*	*	*	*	*	*	*	*	*	*	*	*	*	*	*	*
23	Quintana Roo	7	Lázaro Cárdenas	73	Santa Melva	872502	205426	20	19	9	10	3	1	2	7	1	6	2	16	8	8	0	2	0	2	2	14	12	8	4	0	2	8	5	3	12	8	4	4	3	1	2	1	1	90	5.33	16	0	0
23	Quintana Roo	7	Lázaro Cárdenas	78	Tres Marías	871314	205053	20	43	20	23	7	5	2	16	7	9	1	36	15	21	6	8	1	7	2	29	27	13	14	7	12	22	10	12	25	12	13	5	3	2	3	3	0	86.96	2.31	36	0	0
23	Quintana Roo	7	Lázaro Cárdenas	111	Pocito	873259	203902	20	2	*	*	*	*	*	*	*	*	*	*	*	*	*	*	*	*	*	*	*	*	*	*	*	*	*	*	*	*	*	*	*	*	*	*	*	*	*	*	*	*
23	Quintana Roo	7	Lázaro Cárdenas	139	Pacchen	873523	203812	20	107	53	54	22	11	11	41	18	23	0	85	42	43	11	19	7	12	8	74	66	35	31	26	24	57	30	27	58	29	29	9	5	4	2	1	1	98.15	2.75	82	3	0
23	Quintana Roo	7	Lázaro Cárdenas	150	Poxil	873231	203936	20	16	8	8	1	0	1	7	4	3	0	15	8	7	5	6	4	2	1	10	9	4	5	4	5	8	3	5	7	3	4	1	1	0	1	1	0	100	2	15	0	0
23	Quintana Roo	7	Lázaro Cárdenas	159	San Antonio	873153	204902	20	54	29	25	9	6	3	19	10	9	1	45	23	22	7	9	4	5	2	37	35	19	16	14	15	31	15	16	31	18	13	4	4	0	3	3	0	116	2.11	45	0	0
23	Quintana Roo	7	Lázaro Cárdenas	160	San Arturo	872849	204743	20	4	*	*	*	*	*	*	*	*	*	*	*	*	*	*	*	*	*	*	*	*	*	*	*	*	*	*	*	*	*	*	*	*	*	*	*	*	*	*	*	*
23	Quintana Roo	7	Lázaro Cárdenas	179	Vicente Guerrero	872932	205859	20	538	291	247	63	41	22	195	106	89	14	474	249	225	69	118	59	59	49	391	342	184	158	106	118	291	156	135	299	158	141	51	28	23	36	19	17	117.81	3.5	467	0	0
23	Quintana Roo	7	Lázaro Cárdenas	191	Rancho Talismán	873010	205302	5	11	4	7	1	0	1	6	1	5	0	10	4	6	3	5	1	4	2	7	5	3	2	0	2	3	1	2	5	3	2	2	2	0	1	1	0	57.14	4.67	10	0	0
23	Quintana Roo	7	Lázaro Cárdenas	194	Santo Domingo	872300	205517	20	237	117	120	25	9	16	83	36	47	7	211	108	103	32	51	25	26	19	172	153	81	72	52	57	134	71	63	135	70	65	19	10	9	14	8	6	97.5	2.72	211	0	0
23	Quintana Roo	7	Lázaro Cárdenas	241	San José	872346	205518	20	10	*	*	*	*	*	*	*	*	*	*	*	*	*	*	*	*	*	*	*	*	*	*	*	*	*	*	*	*	*	*	*	*	*	*	*	*	*	*	*	*
23	Quintana Roo	7	Lázaro Cárdenas	279	Guadalupe	873530	205242	20	13	8	5	1	0	1	3	1	2	1	12	8	4	0	1	0	1	1	11	10	7	3	4	3	9	6	3	9	6	3	1	1	0	1	1	0	160	0.75	12	0	0
23	Quintana Roo	7	Lázaro Cárdenas	293	El Pocito	871924	205710	20	5	*	*	*	*	*	*	*	*	*	*	*	*	*	*	*	*	*	*	*	*	*	*	*	*	*	*	*	*	*	*	*	*	*	*	*	*	*	*	*	*
23	Quintana Roo	7	Lázaro Cárdenas	298	Laguna Costa Rica	872051	204244	20	62	31	31	0	0	0	0	0	0	0	0	0	0	0	0	0	0	0	0	0	0	0	0	0	0	0	0	0	0	0	0	0	0	0	0	0	100	*	0	0	0
23	Quintana Roo	7	Lázaro Cárdenas	321	San Mateo	873329	205236	20	2	*	*	*	*	*	*	*	*	*	*	*	*	*	*	*	*	*	*	*	*	*	*	*	*	*	*	*	*	*	*	*	*	*	*	*	*	*	*	*	*
23	Quintana Roo	7	Lázaro Cárdenas	334	Buenavista	873012	205543	20	5	*	*	*	*	*	*	*	*	*	*	*	*	*	*	*	*	*	*	*	*	*	*	*	*	*	*	*	*	*	*	*	*	*	*	*	*	*	*	*	*
23	Quintana Roo	7	Lázaro Cárdenas	341	Chunyaxché	872556	211917	10	5	*	*	*	*	*	*	*	*	*	*	*	*	*	*	*	*	*	*	*	*	*	*	*	*	*	*	*	*	*	*	*	*	*	*	*	*	*	*	*	*
23	Quintana Roo	7	Lázaro Cárdenas	346	Kantunilkín	872852	210542	20	3	*	*	*	*	*	*	*	*	*	*	*	*	*	*	*	*	*	*	*	*	*	*	*	*	*	*	*	*	*	*	*	*	*	*	*	*	*	*	*	*
23	Quintana Roo	7	Lázaro Cárdenas	348	Kantunilkín	872942	210648	20	13	5	8	1	0	1	4	2	2	0	12	5	7	3	3	2	1	0	9	9	3	6	3	5	7	2	5	7	3	4	2	1	1	1	1	0	62.5	3.17	12	0	0
23	Quintana Roo	7	Lázaro Cárdenas	349	Kantunilkín	872948	210614	20	8	*	*	*	*	*	*	*	*	*	*	*	*	*	*	*	*	*	*	*	*	*	*	*	*	*	*	*	*	*	*	*	*	*	*	*	*	*	*	*	*
23	Quintana Roo	7	Lázaro Cárdenas	372	Los Aluxes	872551	205416	20	16	6	10	2	1	1	4	1	3	0	14	5	9	1	2	0	2	1	13	12	5	7	3	4	8	3	5	11	5	6	4	2	2	3	1	2	60	2.38	14	0	0
23	Quintana Roo	7	Lázaro Cárdenas	389	Constituyentes del Setenta y Cuatro	872605	204116	15	77	39	38	17	8	9	47	25	22	4	60	31	29	18	26	17	9	8	38	30	14	16	10	13	30	14	16	29	13	16	0	0	0	0	0	0	102.63	3.5	59	0	0
23	Quintana Roo	7	Lázaro Cárdenas	9998	Localidades de una vivienda				70	42	28	9	7	2	18	12	6	1	48	28	20	8	8	4	4	0	39	39	23	16	10	13	33	18	15	36	21	15	6	5	1	6	5	1	150	3.19	47	0	0
23	Quintana Roo	7	Lázaro Cárdenas	9999	Localidades de dos viviendas				13	7	6	2	0	2	6	3	3	1	11	7	4	2	3	3	0	1	8	7	4	3	0	3	7	4	3	7	4	3	0	0	0	0	0	0	116.67	2	11	0	0
23	Quintana Roo	8	Solidaridad	0	Total del Municipio				135512	70796	64716	13284	6744	6540	32911	16635	16276	2472	91563	48716	42847	12024	17155	8631	8524	5131	77067	71936	38825	33111	25395	30233	69530	37493	32037	66192	35862	30330	2406	1332	1074	1347	750	597	109.39	1.93	65197	23977	12872
23	Quintana Roo	8	Solidaridad	1	Playa del Carmen	870452	203739	15	100383	52284	48099	9527	4838	4689	23144	11646	11498	1733	65872	34954	30918	8357	11884	5946	5938	3527	55782	52255	28146	24109	18616	22067	50640	27274	23366	48141	26026	22115	1615	872	743	876	479	397	108.7	1.86	45368	19269	10380
23	Quintana Roo	8	Solidaridad	4	Akachén	880234	201608	15	21	12	9	6	5	1	9	5	4	0	15	7	8	2	3	0	3	1	13	12	7	5	8	4	11	6	5	9	4	5	1	1	0	0	0	0	133.33	3.67	15	0	0
23	Quintana Roo	8	Solidaridad	5	Aktún Kú	880212	201520	15	10	*	*	*	*	*	*	*	*	*	*	*	*	*	*	*	*	*	*	*	*	*	*	*	*	*	*	*	*	*	*	*	*	*	*	*	*	*	*	*	*
23	Quintana Roo	8	Solidaridad	6	Akumal	871916	202400	5	1198	644	554	142	71	71	407	204	203	31	1042	566	476	159	234	117	117	75	852	777	433	344	282	313	755	418	337	694	383	311	22	15	7	9	5	4	116.25	1.97	852	171	101
23	Quintana Roo	8	Solidaridad	8	Rancho Alegre	872035	202357	5	1	*	*	*	*	*	*	*	*	*	*	*	*	*	*	*	*	*	*	*	*	*	*	*	*	*	*	*	*	*	*	*	*	*	*	*	*	*	*	*	*
23	Quintana Roo	8	Solidaridad	9	Akumal Sur	871930	202254	5	14	7	7	2	0	2	6	3	3	0	12	7	5	3	4	3	1	1	9	8	4	4	1	4	8	4	4	7	4	3	0	0	0	0	0	0	100	1.75	10	2	1
23	Quintana Roo	8	Solidaridad	11	Ana y José	872718	200929	5	4	*	*	*	*	*	*	*	*	*	*	*	*	*	*	*	*	*	*	*	*	*	*	*	*	*	*	*	*	*	*	*	*	*	*	*	*	*	*	*	*
23	Quintana Roo	8	Solidaridad	16	Artesanías Xpu Ha	871556	202827	5	1	*	*	*	*	*	*	*	*	*	*	*	*	*	*	*	*	*	*	*	*	*	*	*	*	*	*	*	*	*	*	*	*	*	*	*	*	*	*	*	*
23	Quintana Roo	8	Solidaridad	19	El Balandrín	872840	200334	5	7	*	*	*	*	*	*	*	*	*	*	*	*	*	*	*	*	*	*	*	*	*	*	*	*	*	*	*	*	*	*	*	*	*	*	*	*	*	*	*	*
23	Quintana Roo	8	Solidaridad	22	Boca Paila	872840	200154	5	10	9	1	1	1	0	1	1	0	0	9	8	1	0	0	0	0	0	9	9	8	1	4	1	9	8	1	9	8	1	0	0	0	0	0	0	900	1	8	1	1
23	Quintana Roo	8	Solidaridad	25	Chilly Willy's	870619	203638	5	4	*	*	*	*	*	*	*	*	*	*	*	*	*	*	*	*	*	*	*	*	*	*	*	*	*	*	*	*	*	*	*	*	*	*	*	*	*	*	*	*
23	Quintana Roo	8	Solidaridad	26	Cabañas Tulum	872720	200924	5	7	4	3	0	0	0	2	1	1	0	7	4	3	2	2	1	1	0	5	5	3	2	0	2	5	3	2	5	3	2	0	0	0	0	0	0	133.33	1	5	2	1
23	Quintana Roo	8	Solidaridad	30	Capitán Lafitte	870120	204028	5	7	*	*	*	*	*	*	*	*	*	*	*	*	*	*	*	*	*	*	*	*	*	*	*	*	*	*	*	*	*	*	*	*	*	*	*	*	*	*	*	*
23	Quintana Roo	8	Solidaridad	33	Caseta de Bombeo	870824	203943	10	3	*	*	*	*	*	*	*	*	*	*	*	*	*	*	*	*	*	*	*	*	*	*	*	*	*	*	*	*	*	*	*	*	*	*	*	*	*	*	*	*
23	Quintana Roo	8	Solidaridad	34	Caseta Arco Maya	872757	200736	5	2	*	*	*	*	*	*	*	*	*	*	*	*	*	*	*	*	*	*	*	*	*	*	*	*	*	*	*	*	*	*	*	*	*	*	*	*	*	*	*	*
23	Quintana Roo	8	Solidaridad	38	Cenote Azul	871505	202917	5	4	*	*	*	*	*	*	*	*	*	*	*	*	*	*	*	*	*	*	*	*	*	*	*	*	*	*	*	*	*	*	*	*	*	*	*	*	*	*	*	*
23	Quintana Roo	8	Solidaridad	40	Hemingway	872705	200957	5	2	*	*	*	*	*	*	*	*	*	*	*	*	*	*	*	*	*	*	*	*	*	*	*	*	*	*	*	*	*	*	*	*	*	*	*	*	*	*	*	*
23	Quintana Roo	8	Solidaridad	43	Chanchen Primero	875804	202402	15	793	400	393	104	52	52	336	176	160	23	689	348	341	136	209	110	99	73	530	457	224	233	176	196	427	208	219	401	199	202	30	16	14	21	10	11	101.78	2.8	679	1	0
23	Quintana Roo	8	Solidaridad	44	Chanchén Palmar	875828	201723	15	398	195	203	65	30	35	181	90	91	12	333	165	168	74	104	53	51	30	247	217	105	112	82	95	202	98	104	188	94	94	15	7	8	6	3	3	96.06	2.98	330	1	1
23	Quintana Roo	8	Solidaridad	52	Los Cinco Hermanos	865832	204515	10	4	*	*	*	*	*	*	*	*	*	*	*	*	*	*	*	*	*	*	*	*	*	*	*	*	*	*	*	*	*	*	*	*	*	*	*	*	*	*	*	*
23	Quintana Roo	8	Solidaridad	53	Ciudad Chemuyil	872111	202055	5	1239	645	594	132	64	68	393	201	192	32	1039	547	492	154	229	117	112	75	853	778	410	368	261	337	756	398	358	713	377	336	22	12	10	10	4	6	108.59	1.99	961	70	31
23	Quintana Roo	8	Solidaridad	55	Akumal Beach Resorts	871900	202341	5	18	*	*	*	*	*	*	*	*	*	*	*	*	*	*	*	*	*	*	*	*	*	*	*	*	*	*	*	*	*	*	*	*	*	*	*	*	*	*	*	*
23	Quintana Roo	8	Solidaridad	56	Cobá	874410	202941	15	1167	608	559	127	72	55	461	254	207	38	1038	535	503	199	296	152	144	97	801	704	353	351	277	307	657	324	333	612	304	308	47	29	18	29	19	10	108.77	2.67	986	33	15
23	Quintana Roo	8	Solidaridad	59	Conchita Paa Mul	871139	203111	5	4	*	*	*	*	*	*	*	*	*	*	*	*	*	*	*	*	*	*	*	*	*	*	*	*	*	*	*	*	*	*	*	*	*	*	*	*	*	*	*	*
23	Quintana Roo	8	Solidaridad	60	Mateo y Juana	871144	203107	5	4	*	*	*	*	*	*	*	*	*	*	*	*	*	*	*	*	*	*	*	*	*	*	*	*	*	*	*	*	*	*	*	*	*	*	*	*	*	*	*	*
23	Quintana Roo	8	Solidaridad	65	La Curva	872714	195605	5	3	*	*	*	*	*	*	*	*	*	*	*	*	*	*	*	*	*	*	*	*	*	*	*	*	*	*	*	*	*	*	*	*	*	*	*	*	*	*	*	*
23	Quintana Roo	8	Solidaridad	69	Cuatro Hermanos	870054	204524	10	12	9	3	2	0	2	3	1	2	1	10	9	1	0	0	0	0	0	9	9	8	1	3	1	9	8	1	9	8	1	0	0	0	0	0	0	300	3	6	4	4
23	Quintana Roo	8	Solidaridad	74	Dzi-Baan-Actún	872624	201141	5	2	*	*	*	*	*	*	*	*	*	*	*	*	*	*	*	*	*	*	*	*	*	*	*	*	*	*	*	*	*	*	*	*	*	*	*	*	*	*	*	*
23	Quintana Roo	8	Solidaridad	76	Ek Che	875845	202221	15	5	*	*	*	*	*	*	*	*	*	*	*	*	*	*	*	*	*	*	*	*	*	*	*	*	*	*	*	*	*	*	*	*	*	*	*	*	*	*	*	*
23	Quintana Roo	8	Solidaridad	79	San Antonio	870056	204604	10	4	*	*	*	*	*	*	*	*	*	*	*	*	*	*	*	*	*	*	*	*	*	*	*	*	*	*	*	*	*	*	*	*	*	*	*	*	*	*	*	*
23	Quintana Roo	8	Solidaridad	82	La Esperanza	872130	201957	5	1	*	*	*	*	*	*	*	*	*	*	*	*	*	*	*	*	*	*	*	*	*	*	*	*	*	*	*	*	*	*	*	*	*	*	*	*	*	*	*	*
23	Quintana Roo	8	Solidaridad	89	Francisco Uh May	873533	202159	15	352	181	171	54	29	25	155	79	76	15	297	151	146	61	86	42	44	25	221	196	101	95	72	82	184	91	93	167	87	80	12	10	2	7	6	1	105.85	2.83	286	5	3
23	Quintana Roo	8	Solidaridad	92	Los Gavilanes	870053	204306	10	8	*	*	*	*	*	*	*	*	*	*	*	*	*	*	*	*	*	*	*	*	*	*	*	*	*	*	*	*	*	*	*	*	*	*	*	*	*	*	*	*
23	Quintana Roo	8	Solidaridad	93	La Gloria	870227	204053	5	6	*	*	*	*	*	*	*	*	*	*	*	*	*	*	*	*	*	*	*	*	*	*	*	*	*	*	*	*	*	*	*	*	*	*	*	*	*	*	*	*
23	Quintana Roo	8	Solidaridad	95	El Gran Cenote	872749	201442	5	1	*	*	*	*	*	*	*	*	*	*	*	*	*	*	*	*	*	*	*	*	*	*	*	*	*	*	*	*	*	*	*	*	*	*	*	*	*	*	*	*
23	Quintana Roo	8	Solidaridad	103	Hondzonot	875823	202204	15	278	150	128	42	23	19	115	64	51	9	236	127	109	45	64	35	29	19	182	163	86	77	46	61	139	73	66	145	77	68	24	13	11	18	10	8	117.19	3.01	230	0	0
23	Quintana Roo	8	Solidaridad	104	Don Nico	870615	203817	10	43	26	17	6	5	1	14	9	5	3	37	21	16	5	5	3	2	0	29	29	17	12	8	10	29	17	12	27	15	12	0	0	0	0	0	0	152.94	2.08	25	12	5
23	Quintana Roo	8	Solidaridad	107	Santa Teresita del Niño Jesús	870155	204541	10	2	*	*	*	*	*	*	*	*	*	*	*	*	*	*	*	*	*	*	*	*	*	*	*	*	*	*	*	*	*	*	*	*	*	*	*	*	*	*	*	*
23	Quintana Roo	8	Solidaridad	122	El Pedregal	873020	201610	5	1	*	*	*	*	*	*	*	*	*	*	*	*	*	*	*	*	*	*	*	*	*	*	*	*	*	*	*	*	*	*	*	*	*	*	*	*	*	*	*	*
23	Quintana Roo	8	Solidaridad	124	Localidad sin Nombre	872716	201309	5	4	*	*	*	*	*	*	*	*	*	*	*	*	*	*	*	*	*	*	*	*	*	*	*	*	*	*	*	*	*	*	*	*	*	*	*	*	*	*	*	*
23	Quintana Roo	8	Solidaridad	125	Cayetano Nieto Colín	872737	201406	5	2	*	*	*	*	*	*	*	*	*	*	*	*	*	*	*	*	*	*	*	*	*	*	*	*	*	*	*	*	*	*	*	*	*	*	*	*	*	*	*	*
23	Quintana Roo	8	Solidaridad	130	Izamal	865854	204445	10	3	*	*	*	*	*	*	*	*	*	*	*	*	*	*	*	*	*	*	*	*	*	*	*	*	*	*	*	*	*	*	*	*	*	*	*	*	*	*	*	*
23	Quintana Roo	8	Solidaridad	131	El Jabalí	870101	204236	10	7	3	4	2	0	2	2	0	2	0	5	3	2	0	0	0	0	0	5	5	3	2	1	1	4	2	2	5	3	2	1	1	0	0	0	0	75	2.5	5	0	0
23	Quintana Roo	8	Solidaridad	133	Javier Rojo Gómez (Punta Allen)	872835	194759	5	277	138	139	30	12	18	79	33	46	4	247	126	121	26	45	17	28	19	217	198	105	93	54	81	188	99	89	177	92	85	10	6	4	5	3	2	99.28	2.1	239	4	1
23	Quintana Roo	8	Solidaridad	135	José María Pino Suárez	873534	200633	5	41	25	16	5	3	2	13	8	5	2	36	22	14	5	6	4	2	1	29	28	17	11	5	8	24	15	9	27	16	11	4	2	2	3	2	1	156.25	3.08	34	2	2
23	Quintana Roo	8	Solidaridad	143	La Lupita Paso Lágrimas	872848	200253	5	4	*	*	*	*	*	*	*	*	*	*	*	*	*	*	*	*	*	*	*	*	*	*	*	*	*	*	*	*	*	*	*	*	*	*	*	*	*	*	*	*
23	Quintana Roo	8	Solidaridad	146	La Ley del Monte	865832	204502	10	7	*	*	*	*	*	*	*	*	*	*	*	*	*	*	*	*	*	*	*	*	*	*	*	*	*	*	*	*	*	*	*	*	*	*	*	*	*	*	*	*
23	Quintana Roo	8	Solidaridad	150	Loma Bonita	865814	204539	10	2	*	*	*	*	*	*	*	*	*	*	*	*	*	*	*	*	*	*	*	*	*	*	*	*	*	*	*	*	*	*	*	*	*	*	*	*	*	*	*	*
23	Quintana Roo	8	Solidaridad	153	Macario Gómez	873433	202101	10	285	144	141	45	23	22	129	63	66	11	240	121	119	48	73	35	38	25	181	156	81	75	56	64	151	78	73	138	72	66	5	3	2	2	1	1	102.13	2.79	237	1	0
23	Quintana Roo	8	Solidaridad	155	El Manatí	872333	201644	10	1	*	*	*	*	*	*	*	*	*	*	*	*	*	*	*	*	*	*	*	*	*	*	*	*	*	*	*	*	*	*	*	*	*	*	*	*	*	*	*	*
23	Quintana Roo	8	Solidaridad	158	El Manguito	870047	204300	10	1	*	*	*	*	*	*	*	*	*	*	*	*	*	*	*	*	*	*	*	*	*	*	*	*	*	*	*	*	*	*	*	*	*	*	*	*	*	*	*	*
23	Quintana Roo	8	Solidaridad	159	Manuel Antonio Ay	873916	202552	15	319	176	143	44	24	20	141	77	64	12	262	146	116	55	85	48	37	30	195	165	93	72	61	64	153	86	67	137	75	62	12	7	5	10	7	3	123.08	2.95	262	0	0
23	Quintana Roo	8	Solidaridad	160	Mar Caribe	872559	201215	5	1	*	*	*	*	*	*	*	*	*	*	*	*	*	*	*	*	*	*	*	*	*	*	*	*	*	*	*	*	*	*	*	*	*	*	*	*	*	*	*	*
23	Quintana Roo	8	Solidaridad	161	Punta Piedra	872651	201031	5	3	*	*	*	*	*	*	*	*	*	*	*	*	*	*	*	*	*	*	*	*	*	*	*	*	*	*	*	*	*	*	*	*	*	*	*	*	*	*	*	*
23	Quintana Roo	8	Solidaridad	165	Marr del Greco	872837	194833	5	3	*	*	*	*	*	*	*	*	*	*	*	*	*	*	*	*	*	*	*	*	*	*	*	*	*	*	*	*	*	*	*	*	*	*	*	*	*	*	*	*
23	Quintana Roo	8	Solidaridad	168	El Mirador	872556	201226	5	1	*	*	*	*	*	*	*	*	*	*	*	*	*	*	*	*	*	*	*	*	*	*	*	*	*	*	*	*	*	*	*	*	*	*	*	*	*	*	*	*
23	Quintana Roo	8	Solidaridad	169	San Agustín	872809	201528	5	3	*	*	*	*	*	*	*	*	*	*	*	*	*	*	*	*	*	*	*	*	*	*	*	*	*	*	*	*	*	*	*	*	*	*	*	*	*	*	*	*
23	Quintana Roo	8	Solidaridad	172	Mulichén	880140	201456	30	33	17	16	6	2	4	11	5	6	1	12	7	5	4	4	2	2	0	7	7	4	3	3	3	7	4	3	6	4	2	0	0	0	0	0	0	106.25	3.67	12	0	0
23	Quintana Roo	8	Solidaridad	177	Maya Tulum	872702	201003	5	4	*	*	*	*	*	*	*	*	*	*	*	*	*	*	*	*	*	*	*	*	*	*	*	*	*	*	*	*	*	*	*	*	*	*	*	*	*	*	*	*
23	Quintana Roo	8	Solidaridad	179	Paa Mul	871133	203121	5	66	*	*	*	*	*	*	*	*	*	*	*	*	*	*	*	*	*	*	*	*	*	*	*	*	*	*	*	*	*	*	*	*	*	*	*	*	*	*	*	*
23	Quintana Roo	8	Solidaridad	180	El Palomar	870018	204511	10	5	*	*	*	*	*	*	*	*	*	*	*	*	*	*	*	*	*	*	*	*	*	*	*	*	*	*	*	*	*	*	*	*	*	*	*	*	*	*	*	*
23	Quintana Roo	8	Solidaridad	183	Paraíso	871426	202955	5	7	*	*	*	*	*	*	*	*	*	*	*	*	*	*	*	*	*	*	*	*	*	*	*	*	*	*	*	*	*	*	*	*	*	*	*	*	*	*	*	*
23	Quintana Roo	8	Solidaridad	185	El Paraíso	872604	201202	5	1	*	*	*	*	*	*	*	*	*	*	*	*	*	*	*	*	*	*	*	*	*	*	*	*	*	*	*	*	*	*	*	*	*	*	*	*	*	*	*	*
23	Quintana Roo	8	Solidaridad	186	El Paraíso	872838	200131	5	2	*	*	*	*	*	*	*	*	*	*	*	*	*	*	*	*	*	*	*	*	*	*	*	*	*	*	*	*	*	*	*	*	*	*	*	*	*	*	*	*
23	Quintana Roo	8	Solidaridad	194	Pez Maya	872839	200014	5	2	*	*	*	*	*	*	*	*	*	*	*	*	*	*	*	*	*	*	*	*	*	*	*	*	*	*	*	*	*	*	*	*	*	*	*	*	*	*	*	*
23	Quintana Roo	8	Solidaridad	195	El Pícaro	870147	204158	10	3	*	*	*	*	*	*	*	*	*	*	*	*	*	*	*	*	*	*	*	*	*	*	*	*	*	*	*	*	*	*	*	*	*	*	*	*	*	*	*	*
23	Quintana Roo	8	Solidaridad	200	Playa del Secreto	865635	204643	5	21	10	11	2	1	1	4	2	2	1	19	9	10	1	1	0	1	0	17	17	8	9	6	7	17	8	9	17	8	9	0	0	0	0	0	0	90.91	1.22	15	4	2
23	Quintana Roo	8	Solidaridad	201	Iberostar	865729	204533	10	492	*	*	*	*	*	*	*	*	*	*	*	*	*	*	*	*	*	*	*	*	*	*	*	*	*	*	*	*	*	*	*	*	*	*	*	*	*	*	*	*
23	Quintana Roo	8	Solidaridad	202	Playa Xcalacoco	870151	203952	5	12	8	4	0	0	0	0	0	0	0	12	8	4	0	0	0	0	0	12	12	8	4	4	3	11	7	4	12	8	4	1	1	0	0	0	0	200	2.5	6	5	4
23	Quintana Roo	8	Solidaridad	205	El Jardín del Edén	871529	202930	5	5	*	*	*	*	*	*	*	*	*	*	*	*	*	*	*	*	*	*	*	*	*	*	*	*	*	*	*	*	*	*	*	*	*	*	*	*	*	*	*	*
23	Quintana Roo	8	Solidaridad	211	Puerto Aventuras	871332	203014	10	360	179	181	25	12	13	80	39	41	5	283	141	142	40	50	26	24	10	238	228	114	114	26	98	208	101	107	220	111	109	20	13	7	14	9	5	98.9	1.26	153	79	38
23	Quintana Roo	8	Solidaridad	213	Puerto Chile	871600	202818	5	14	8	6	3	1	2	5	2	3	0	11	7	4	1	2	1	1	1	10	9	6	3	5	3	8	5	3	8	6	2	1	1	0	1	1	0	133.33	1.5	11	0	0
23	Quintana Roo	8	Solidaridad	219	Piedra Escondida	872654	201024	5	3	*	*	*	*	*	*	*	*	*	*	*	*	*	*	*	*	*	*	*	*	*	*	*	*	*	*	*	*	*	*	*	*	*	*	*	*	*	*	*	*
23	Quintana Roo	8	Solidaridad	224	Ramonal	874407	202250	15	2	*	*	*	*	*	*	*	*	*	*	*	*	*	*	*	*	*	*	*	*	*	*	*	*	*	*	*	*	*	*	*	*	*	*	*	*	*	*	*	*
23	Quintana Roo	8	Solidaridad	225	Nueva Vida	872734	200845	5	13	5	8	1	1	0	2	2	0	0	12	4	8	0	1	1	0	1	12	11	3	8	1	6	9	2	7	11	3	8	2	1	1	0	0	0	62.5	1.88	9	3	2
23	Quintana Roo	8	Solidaridad	228	Relleno Sanitario	870038	204325	10	7	*	*	*	*	*	*	*	*	*	*	*	*	*	*	*	*	*	*	*	*	*	*	*	*	*	*	*	*	*	*	*	*	*	*	*	*	*	*	*	*
23	Quintana Roo	8	Solidaridad	230	River Mar (Don Pancho)	871151	203137	5	1	*	*	*	*	*	*	*	*	*	*	*	*	*	*	*	*	*	*	*	*	*	*	*	*	*	*	*	*	*	*	*	*	*	*	*	*	*	*	*	*
23	Quintana Roo	8	Solidaridad	231	Robinson Club Tulum	871545	202806	5	35	*	*	*	*	*	*	*	*	*	*	*	*	*	*	*	*	*	*	*	*	*	*	*	*	*	*	*	*	*	*	*	*	*	*	*	*	*	*	*	*
23	Quintana Roo	8	Solidaridad	232	El Ranchito	870723	203505	5	20	10	10	1	0	1	3	1	2	1	11	6	5	1	1	1	0	0	9	9	5	4	5	4	9	5	4	9	5	4	0	0	0	0	0	0	100	0.75	8	3	2
23	Quintana Roo	8	Solidaridad	236	Sagrado Corazón de Jesús	871819	202529	5	3	*	*	*	*	*	*	*	*	*	*	*	*	*	*	*	*	*	*	*	*	*	*	*	*	*	*	*	*	*	*	*	*	*	*	*	*	*	*	*	*
23	Quintana Roo	8	Solidaridad	237	Sahcab Mucuy	875832	202455	15	403	203	200	51	26	25	188	97	91	21	352	177	175	80	116	57	59	36	251	215	106	109	69	92	199	98	101	188	93	95	16	8	8	14	7	7	101.5	2.83	349	0	0
23	Quintana Roo	8	Solidaridad	239	San Antonio	870754	203526	10	6	*	*	*	*	*	*	*	*	*	*	*	*	*	*	*	*	*	*	*	*	*	*	*	*	*	*	*	*	*	*	*	*	*	*	*	*	*	*	*	*
23	Quintana Roo	8	Solidaridad	241	San Antonio	871805	202546	5	4	*	*	*	*	*	*	*	*	*	*	*	*	*	*	*	*	*	*	*	*	*	*	*	*	*	*	*	*	*	*	*	*	*	*	*	*	*	*	*	*
23	Quintana Roo	8	Solidaridad	245	Santa Cruz	872834	201540	5	6	*	*	*	*	*	*	*	*	*	*	*	*	*	*	*	*	*	*	*	*	*	*	*	*	*	*	*	*	*	*	*	*	*	*	*	*	*	*	*	*
23	Quintana Roo	8	Solidaridad	246	San Carlos (kilómetro 45)	865652	204724	10	8	*	*	*	*	*	*	*	*	*	*	*	*	*	*	*	*	*	*	*	*	*	*	*	*	*	*	*	*	*	*	*	*	*	*	*	*	*	*	*	*
23	Quintana Roo	8	Solidaridad	248	San Diego	865926	204440	10	1	*	*	*	*	*	*	*	*	*	*	*	*	*	*	*	*	*	*	*	*	*	*	*	*	*	*	*	*	*	*	*	*	*	*	*	*	*	*	*	*
23	Quintana Roo	8	Solidaridad	259	San Isidro	875854	202439	15	8	*	*	*	*	*	*	*	*	*	*	*	*	*	*	*	*	*	*	*	*	*	*	*	*	*	*	*	*	*	*	*	*	*	*	*	*	*	*	*	*
23	Quintana Roo	8	Solidaridad	264	San José Ichtzel	870022	204345	10	1	*	*	*	*	*	*	*	*	*	*	*	*	*	*	*	*	*	*	*	*	*	*	*	*	*	*	*	*	*	*	*	*	*	*	*	*	*	*	*	*
23	Quintana Roo	8	Solidaridad	265	San José	871456	202925	5	59	29	30	0	0	0	3	1	2	0	7	3	4	2	3	1	2	1	5	4	2	2	1	2	4	2	2	4	2	2	0	0	0	0	0	0	96.67	1.33	7	0	0
23	Quintana Roo	8	Solidaridad	267	San Juan	874332	202501	15	505	265	240	68	40	28	227	128	99	15	437	225	212	91	144	77	67	53	331	278	137	141	103	119	247	121	126	245	121	124	31	16	15	16	8	8	110.42	3.26	431	2	1
23	Quintana Roo	8	Solidaridad	269	San Lorenzo	871600	202824	5	20	13	7	0	0	0	2	1	1	1	20	13	7	1	1	0	1	0	18	18	12	6	12	6	17	11	6	14	9	5	1	1	0	1	1	0	185.71	1.4	5	15	11
23	Quintana Roo	8	Solidaridad	270	San Miguel	871553	202830	5	10	*	*	*	*	*	*	*	*	*	*	*	*	*	*	*	*	*	*	*	*	*	*	*	*	*	*	*	*	*	*	*	*	*	*	*	*	*	*	*	*
23	Quintana Roo	8	Solidaridad	271	San Martín	875757	202305	15	13	*	*	*	*	*	*	*	*	*	*	*	*	*	*	*	*	*	*	*	*	*	*	*	*	*	*	*	*	*	*	*	*	*	*	*	*	*	*	*	*
23	Quintana Roo	8	Solidaridad	272	San Mateo	871416	203004	5	12	*	*	*	*	*	*	*	*	*	*	*	*	*	*	*	*	*	*	*	*	*	*	*	*	*	*	*	*	*	*	*	*	*	*	*	*	*	*	*	*
23	Quintana Roo	8	Solidaridad	274	San Miguel	871623	202757	5	1	*	*	*	*	*	*	*	*	*	*	*	*	*	*	*	*	*	*	*	*	*	*	*	*	*	*	*	*	*	*	*	*	*	*	*	*	*	*	*	*
23	Quintana Roo	8	Solidaridad	283	San Silverio	880211	202132	10	543	277	266	59	35	24	196	105	91	9	476	238	238	90	128	66	62	38	377	339	168	171	108	138	296	145	151	305	153	152	43	23	20	27	15	12	104.14	2.98	473	2	0
23	Quintana Roo	8	Solidaridad	284	San Vicente	871420	202959	5	5	*	*	*	*	*	*	*	*	*	*	*	*	*	*	*	*	*	*	*	*	*	*	*	*	*	*	*	*	*	*	*	*	*	*	*	*	*	*	*	*
23	Quintana Roo	8	Solidaridad	285	San Víctor	871731	202636	5	4	*	*	*	*	*	*	*	*	*	*	*	*	*	*	*	*	*	*	*	*	*	*	*	*	*	*	*	*	*	*	*	*	*	*	*	*	*	*	*	*
23	Quintana Roo	8	Solidaridad	288	Santa Elena	870104	204519	10	7	*	*	*	*	*	*	*	*	*	*	*	*	*	*	*	*	*	*	*	*	*	*	*	*	*	*	*	*	*	*	*	*	*	*	*	*	*	*	*	*
23	Quintana Roo	8	Solidaridad	297	Santa Pilar	871956	202406	5	1	*	*	*	*	*	*	*	*	*	*	*	*	*	*	*	*	*	*	*	*	*	*	*	*	*	*	*	*	*	*	*	*	*	*	*	*	*	*	*	*
23	Quintana Roo	8	Solidaridad	299	Santa Rosa	870116	204522	10	1	*	*	*	*	*	*	*	*	*	*	*	*	*	*	*	*	*	*	*	*	*	*	*	*	*	*	*	*	*	*	*	*	*	*	*	*	*	*	*	*
23	Quintana Roo	8	Solidaridad	300	Santa Rosa	871407	203012	5	8	6	2	1	1	0	2	2	0	0	7	5	2	1	1	1	0	0	6	6	4	2	2	2	4	2	2	6	4	2	2	2	0	1	1	0	300	1	7	0	0
23	Quintana Roo	8	Solidaridad	304	La Selva	870116	204527	10	3	*	*	*	*	*	*	*	*	*	*	*	*	*	*	*	*	*	*	*	*	*	*	*	*	*	*	*	*	*	*	*	*	*	*	*	*	*	*	*	*
23	Quintana Roo	8	Solidaridad	308	Puerto Aventuras	871403	203042	5	1629	848	781	205	111	94	523	281	242	40	1345	696	649	193	278	153	125	85	1112	1027	526	501	379	467	995	510	485	943	485	458	32	16	16	22	11	11	108.58	2.03	971	356	179
23	Quintana Roo	8	Solidaridad	310	Tankah Tres	872343	201543	5	43	20	23	4	3	1	11	4	7	0	39	17	22	2	7	1	6	5	37	32	16	16	6	12	28	14	14	31	16	15	4	2	2	1	1	0	86.96	1.48	34	5	2
23	Quintana Roo	8	Solidaridad	311	Tankah Cuatro	872246	201701	5	72	38	34	13	6	7	19	10	9	0	51	28	23	5	6	4	2	1	46	45	24	21	9	20	44	23	21	45	24	21	1	1	0	1	1	0	111.76	1.73	19	28	14
23	Quintana Roo	8	Solidaridad	312	Tazol Chico	871450	202931	5	9	*	*	*	*	*	*	*	*	*	*	*	*	*	*	*	*	*	*	*	*	*	*	*	*	*	*	*	*	*	*	*	*	*	*	*	*	*	*	*	*
23	Quintana Roo	8	Solidaridad	314	Tigre Grande	865713	204659	5	5	*	*	*	*	*	*	*	*	*	*	*	*	*	*	*	*	*	*	*	*	*	*	*	*	*	*	*	*	*	*	*	*	*	*	*	*	*	*	*	*
23	Quintana Roo	8	Solidaridad	317	Tres Hermanos	872900	201607	5	3	*	*	*	*	*	*	*	*	*	*	*	*	*	*	*	*	*	*	*	*	*	*	*	*	*	*	*	*	*	*	*	*	*	*	*	*	*	*	*	*
23	Quintana Roo	8	Solidaridad	323	Tulum	872757	201243	5	14790	7575	7215	1508	760	748	3903	1985	1918	289	9535	4941	4594	1484	2106	1076	1030	622	7762	7140	3716	3424	2625	3108	6873	3573	3300	6467	3366	3101	267	143	124	154	81	73	104.99	2.11	7670	1748	922
23	Quintana Roo	8	Solidaridad	325	Crucero de las Ruinas de Tulum	872612	201305	5	8	*	*	*	*	*	*	*	*	*	*	*	*	*	*	*	*	*	*	*	*	*	*	*	*	*	*	*	*	*	*	*	*	*	*	*	*	*	*	*	*
23	Quintana Roo	8	Solidaridad	329	Las Uvas	872709	200953	5	1	*	*	*	*	*	*	*	*	*	*	*	*	*	*	*	*	*	*	*	*	*	*	*	*	*	*	*	*	*	*	*	*	*	*	*	*	*	*	*	*
23	Quintana Roo	8	Solidaridad	331	Uxuxubi	872328	202728	5	4	*	*	*	*	*	*	*	*	*	*	*	*	*	*	*	*	*	*	*	*	*	*	*	*	*	*	*	*	*	*	*	*	*	*	*	*	*	*	*	*
23	Quintana Roo	8	Solidaridad	336	Xamach Dos	872728	195639	5	2	*	*	*	*	*	*	*	*	*	*	*	*	*	*	*	*	*	*	*	*	*	*	*	*	*	*	*	*	*	*	*	*	*	*	*	*	*	*	*	*
23	Quintana Roo	8	Solidaridad	338	Xbecal	875348	202542	15	8	*	*	*	*	*	*	*	*	*	*	*	*	*	*	*	*	*	*	*	*	*	*	*	*	*	*	*	*	*	*	*	*	*	*	*	*	*	*	*	*
23	Quintana Roo	8	Solidaridad	340	Xcacel	872112	202018	5	11	*	*	*	*	*	*	*	*	*	*	*	*	*	*	*	*	*	*	*	*	*	*	*	*	*	*	*	*	*	*	*	*	*	*	*	*	*	*	*	*
23	Quintana Roo	8	Solidaridad	341	Xcaret	870747	203522	10	27	12	15	0	0	0	5	2	3	0	12	5	7	2	5	2	3	3	10	7	3	4	0	4	7	3	4	7	3	4	0	0	0	0	0	0	80	1	8	4	1
23	Quintana Roo	8	Solidaridad	342	Xcaret	870708	203444	5	18	*	*	*	*	*	*	*	*	*	*	*	*	*	*	*	*	*	*	*	*	*	*	*	*	*	*	*	*	*	*	*	*	*	*	*	*	*	*	*	*
23	Quintana Roo	8	Solidaridad	345	Xpu Ha	871542	202836	5	19	13	6	0	0	0	0	0	0	0	19	13	6	0	0	0	0	0	19	19	13	6	3	5	18	12	6	18	12	6	1	1	0	0	0	0	216.67	2	5	9	8
23	Quintana Roo	8	Solidaridad	350	Yalchén	880059	201833	15	372	170	202	58	20	38	157	65	92	11	310	148	162	59	88	40	48	29	240	211	103	108	94	93	197	95	102	181	94	87	14	8	6	11	6	5	84.16	2.58	310	0	0
23	Quintana Roo	8	Solidaridad	351	Yaxché	875650	202025	15	301	141	160	31	16	15	121	55	66	9	266	123	143	60	81	35	46	21	197	176	84	92	67	78	157	75	82	149	72	77	19	9	10	13	6	7	88.13	2.86	264	0	0
23	Quintana Roo	8	Solidaridad	353	Yokop	875842	202439	15	1	*	*	*	*	*	*	*	*	*	*	*	*	*	*	*	*	*	*	*	*	*	*	*	*	*	*	*	*	*	*	*	*	*	*	*	*	*	*	*	*
23	Quintana Roo	8	Solidaridad	356	Zazil-ha	865955	204400	5	3	*	*	*	*	*	*	*	*	*	*	*	*	*	*	*	*	*	*	*	*	*	*	*	*	*	*	*	*	*	*	*	*	*	*	*	*	*	*	*	*
23	Quintana Roo	8	Solidaridad	367	Agua Viva	870741	203538	10	9	*	*	*	*	*	*	*	*	*	*	*	*	*	*	*	*	*	*	*	*	*	*	*	*	*	*	*	*	*	*	*	*	*	*	*	*	*	*	*	*
23	Quintana Roo	8	Solidaridad	368	Águila Azteca	872802	201502	5	2	*	*	*	*	*	*	*	*	*	*	*	*	*	*	*	*	*	*	*	*	*	*	*	*	*	*	*	*	*	*	*	*	*	*	*	*	*	*	*	*
23	Quintana Roo	8	Solidaridad	373	Antares	870619	203821	10	11	*	*	*	*	*	*	*	*	*	*	*	*	*	*	*	*	*	*	*	*	*	*	*	*	*	*	*	*	*	*	*	*	*	*	*	*	*	*	*	*
23	Quintana Roo	8	Solidaridad	375	Retiro Maya	872713	200944	5	2	*	*	*	*	*	*	*	*	*	*	*	*	*	*	*	*	*	*	*	*	*	*	*	*	*	*	*	*	*	*	*	*	*	*	*	*	*	*	*	*
23	Quintana Roo	8	Solidaridad	377	Artesanias Mexicanas	871755	202557	5	5	*	*	*	*	*	*	*	*	*	*	*	*	*	*	*	*	*	*	*	*	*	*	*	*	*	*	*	*	*	*	*	*	*	*	*	*	*	*	*	*
23	Quintana Roo	8	Solidaridad	380	Bahía Príncipe Akumal	871958	202212	5	47	*	*	*	*	*	*	*	*	*	*	*	*	*	*	*	*	*	*	*	*	*	*	*	*	*	*	*	*	*	*	*	*	*	*	*	*	*	*	*	*
23	Quintana Roo	8	Solidaridad	381	La Ballena Junior	872725	200913	5	1	*	*	*	*	*	*	*	*	*	*	*	*	*	*	*	*	*	*	*	*	*	*	*	*	*	*	*	*	*	*	*	*	*	*	*	*	*	*	*	*
23	Quintana Roo	8	Solidaridad	382	Barceló Maya	871446	202915	5	972	*	*	*	*	*	*	*	*	*	*	*	*	*	*	*	*	*	*	*	*	*	*	*	*	*	*	*	*	*	*	*	*	*	*	*	*	*	*	*	*
23	Quintana Roo	8	Solidaridad	384	Bravo Club el Mandarín	870051	204148	10	85	*	*	*	*	*	*	*	*	*	*	*	*	*	*	*	*	*	*	*	*	*	*	*	*	*	*	*	*	*	*	*	*	*	*	*	*	*	*	*	*
23	Quintana Roo	8	Solidaridad	385	Las Cabañas	873623	202256	15	4	*	*	*	*	*	*	*	*	*	*	*	*	*	*	*	*	*	*	*	*	*	*	*	*	*	*	*	*	*	*	*	*	*	*	*	*	*	*	*	*
23	Quintana Roo	8	Solidaridad	389	Cárcel Pública	870813	203930	10	208	*	*	*	*	*	*	*	*	*	*	*	*	*	*	*	*	*	*	*	*	*	*	*	*	*	*	*	*	*	*	*	*	*	*	*	*	*	*	*	*
23	Quintana Roo	8	Solidaridad	393	Casa Malio	872710	200950	5	1	*	*	*	*	*	*	*	*	*	*	*	*	*	*	*	*	*	*	*	*	*	*	*	*	*	*	*	*	*	*	*	*	*	*	*	*	*	*	*	*
23	Quintana Roo	8	Solidaridad	397	Los Cocales	872848	200242	5	3	*	*	*	*	*	*	*	*	*	*	*	*	*	*	*	*	*	*	*	*	*	*	*	*	*	*	*	*	*	*	*	*	*	*	*	*	*	*	*	*
23	Quintana Roo	8	Solidaridad	399	Freedom Paradise	872350	201535	5	8	*	*	*	*	*	*	*	*	*	*	*	*	*	*	*	*	*	*	*	*	*	*	*	*	*	*	*	*	*	*	*	*	*	*	*	*	*	*	*	*
23	Quintana Roo	8	Solidaridad	406	Diamante K	872626	201139	5	5	*	*	*	*	*	*	*	*	*	*	*	*	*	*	*	*	*	*	*	*	*	*	*	*	*	*	*	*	*	*	*	*	*	*	*	*	*	*	*	*
23	Quintana Roo	8	Solidaridad	407	Don Eduardo	870734	203539	10	2	*	*	*	*	*	*	*	*	*	*	*	*	*	*	*	*	*	*	*	*	*	*	*	*	*	*	*	*	*	*	*	*	*	*	*	*	*	*	*	*
23	Quintana Roo	8	Solidaridad	408	Dos Ceibas	872744	200814	5	2	*	*	*	*	*	*	*	*	*	*	*	*	*	*	*	*	*	*	*	*	*	*	*	*	*	*	*	*	*	*	*	*	*	*	*	*	*	*	*	*
23	Quintana Roo	8	Solidaridad	410	La Estrella del Sur	871046	203250	5	2	*	*	*	*	*	*	*	*	*	*	*	*	*	*	*	*	*	*	*	*	*	*	*	*	*	*	*	*	*	*	*	*	*	*	*	*	*	*	*	*
23	Quintana Roo	8	Solidaridad	412	La Flor	872711	200947	5	4	*	*	*	*	*	*	*	*	*	*	*	*	*	*	*	*	*	*	*	*	*	*	*	*	*	*	*	*	*	*	*	*	*	*	*	*	*	*	*	*
23	Quintana Roo	8	Solidaridad	416	Guadalupano	870714	203555	5	8	*	*	*	*	*	*	*	*	*	*	*	*	*	*	*	*	*	*	*	*	*	*	*	*	*	*	*	*	*	*	*	*	*	*	*	*	*	*	*	*
23	Quintana Roo	8	Solidaridad	431	Nelly Tulum	872730	200901	5	1	*	*	*	*	*	*	*	*	*	*	*	*	*	*	*	*	*	*	*	*	*	*	*	*	*	*	*	*	*	*	*	*	*	*	*	*	*	*	*	*
23	Quintana Roo	8	Solidaridad	435	El Limonal	870159	203959	5	5	*	*	*	*	*	*	*	*	*	*	*	*	*	*	*	*	*	*	*	*	*	*	*	*	*	*	*	*	*	*	*	*	*	*	*	*	*	*	*	*
23	Quintana Roo	8	Solidaridad	436	Lomar	870654	203610	5	1	*	*	*	*	*	*	*	*	*	*	*	*	*	*	*	*	*	*	*	*	*	*	*	*	*	*	*	*	*	*	*	*	*	*	*	*	*	*	*	*
23	Quintana Roo	8	Solidaridad	438	Luna y Sol	872744	200812	5	4	*	*	*	*	*	*	*	*	*	*	*	*	*	*	*	*	*	*	*	*	*	*	*	*	*	*	*	*	*	*	*	*	*	*	*	*	*	*	*	*
23	Quintana Roo	8	Solidaridad	447	Monte Cristo	871726	202738	5	7	*	*	*	*	*	*	*	*	*	*	*	*	*	*	*	*	*	*	*	*	*	*	*	*	*	*	*	*	*	*	*	*	*	*	*	*	*	*	*	*
23	Quintana Roo	8	Solidaridad	450	Noh Aktún	873651	202325	15	6	*	*	*	*	*	*	*	*	*	*	*	*	*	*	*	*	*	*	*	*	*	*	*	*	*	*	*	*	*	*	*	*	*	*	*	*	*	*	*	*
23	Quintana Roo	8	Solidaridad	454	Alquimia	872736	200840	5	1	*	*	*	*	*	*	*	*	*	*	*	*	*	*	*	*	*	*	*	*	*	*	*	*	*	*	*	*	*	*	*	*	*	*	*	*	*	*	*	*
23	Quintana Roo	8	Solidaridad	457	Los Pájaros	871055	203239	5	2	*	*	*	*	*	*	*	*	*	*	*	*	*	*	*	*	*	*	*	*	*	*	*	*	*	*	*	*	*	*	*	*	*	*	*	*	*	*	*	*
23	Quintana Roo	8	Solidaridad	463	Papaya Playa	872640	201052	5	11	*	*	*	*	*	*	*	*	*	*	*	*	*	*	*	*	*	*	*	*	*	*	*	*	*	*	*	*	*	*	*	*	*	*	*	*	*	*	*	*
23	Quintana Roo	8	Solidaridad	466	Puerta del Cielo	870046	204224	10	1	*	*	*	*	*	*	*	*	*	*	*	*	*	*	*	*	*	*	*	*	*	*	*	*	*	*	*	*	*	*	*	*	*	*	*	*	*	*	*	*
23	Quintana Roo	8	Solidaridad	467	Puerto Chile (X Catic)	871617	202757	5	10	*	*	*	*	*	*	*	*	*	*	*	*	*	*	*	*	*	*	*	*	*	*	*	*	*	*	*	*	*	*	*	*	*	*	*	*	*	*	*	*
23	Quintana Roo	8	Solidaridad	476	Roberto Canché	873201	201112	10	5	*	*	*	*	*	*	*	*	*	*	*	*	*	*	*	*	*	*	*	*	*	*	*	*	*	*	*	*	*	*	*	*	*	*	*	*	*	*	*	*
23	Quintana Roo	8	Solidaridad	478	Flamboyanes	870717	203904	10	2	*	*	*	*	*	*	*	*	*	*	*	*	*	*	*	*	*	*	*	*	*	*	*	*	*	*	*	*	*	*	*	*	*	*	*	*	*	*	*	*
23	Quintana Roo	8	Solidaridad	480	San Gonzalo	865904	204422	10	5	*	*	*	*	*	*	*	*	*	*	*	*	*	*	*	*	*	*	*	*	*	*	*	*	*	*	*	*	*	*	*	*	*	*	*	*	*	*	*	*
23	Quintana Roo	8	Solidaridad	481	San Isidro	871522	202901	5	5	*	*	*	*	*	*	*	*	*	*	*	*	*	*	*	*	*	*	*	*	*	*	*	*	*	*	*	*	*	*	*	*	*	*	*	*	*	*	*	*
23	Quintana Roo	8	Solidaridad	483	San Martín	871831	202525	5	4	*	*	*	*	*	*	*	*	*	*	*	*	*	*	*	*	*	*	*	*	*	*	*	*	*	*	*	*	*	*	*	*	*	*	*	*	*	*	*	*
23	Quintana Roo	8	Solidaridad	486	Santa Librada	871030	203159	5	4	*	*	*	*	*	*	*	*	*	*	*	*	*	*	*	*	*	*	*	*	*	*	*	*	*	*	*	*	*	*	*	*	*	*	*	*	*	*	*	*
23	Quintana Roo	8	Solidaridad	493	Tita Tulum	872732	200856	5	1	*	*	*	*	*	*	*	*	*	*	*	*	*	*	*	*	*	*	*	*	*	*	*	*	*	*	*	*	*	*	*	*	*	*	*	*	*	*	*	*
23	Quintana Roo	8	Solidaridad	495	El Trébol	871313	203045	5	4	*	*	*	*	*	*	*	*	*	*	*	*	*	*	*	*	*	*	*	*	*	*	*	*	*	*	*	*	*	*	*	*	*	*	*	*	*	*	*	*
23	Quintana Roo	8	Solidaridad	503	Vivero Municipal	870041	204321	10	19	13	6	3	1	2	9	6	3	0	12	10	2	4	6	5	1	2	8	6	5	1	4	1	6	5	1	5	4	1	0	0	0	0	0	0	216.67	1	2	10	8
23	Quintana Roo	8	Solidaridad	505	Vivir como Robinson	872746	200808	5	3	*	*	*	*	*	*	*	*	*	*	*	*	*	*	*	*	*	*	*	*	*	*	*	*	*	*	*	*	*	*	*	*	*	*	*	*	*	*	*	*
23	Quintana Roo	8	Solidaridad	506	El Vuelo del Águila	870248	204614	10	1	*	*	*	*	*	*	*	*	*	*	*	*	*	*	*	*	*	*	*	*	*	*	*	*	*	*	*	*	*	*	*	*	*	*	*	*	*	*	*	*
23	Quintana Roo	8	Solidaridad	510	Yumi Ha	872714	200941	5	4	*	*	*	*	*	*	*	*	*	*	*	*	*	*	*	*	*	*	*	*	*	*	*	*	*	*	*	*	*	*	*	*	*	*	*	*	*	*	*	*
23	Quintana Roo	8	Solidaridad	527	Camping Oasis Sol	872728	200905	5	6	*	*	*	*	*	*	*	*	*	*	*	*	*	*	*	*	*	*	*	*	*	*	*	*	*	*	*	*	*	*	*	*	*	*	*	*	*	*	*	*
23	Quintana Roo	8	Solidaridad	530	Dzonot Ha	870307	204013	5	11	*	*	*	*	*	*	*	*	*	*	*	*	*	*	*	*	*	*	*	*	*	*	*	*	*	*	*	*	*	*	*	*	*	*	*	*	*	*	*	*
23	Quintana Roo	8	Solidaridad	532	Playa Selva	872735	200842	5	3	*	*	*	*	*	*	*	*	*	*	*	*	*	*	*	*	*	*	*	*	*	*	*	*	*	*	*	*	*	*	*	*	*	*	*	*	*	*	*	*
23	Quintana Roo	8	Solidaridad	535	El Mestizo	872746	200806	5	2	*	*	*	*	*	*	*	*	*	*	*	*	*	*	*	*	*	*	*	*	*	*	*	*	*	*	*	*	*	*	*	*	*	*	*	*	*	*	*	*
23	Quintana Roo	8	Solidaridad	537	Muchil	865624	204749	5	6	3	3	0	0	0	0	0	0	0	3	2	1	0	0	0	0	0	3	3	2	1	1	1	3	2	1	3	2	1	0	0	0	0	0	0	100	1	3	0	0
23	Quintana Roo	8	Solidaridad	540	Sac Be	870337	204148	5	17	12	5	2	2	0	5	4	1	2	15	10	5	1	1	1	0	0	12	12	8	4	3	3	11	7	4	11	7	4	1	1	0	1	1	0	240	3.5	5	9	7
23	Quintana Roo	8	Solidaridad	543	El Viejo del Mar	872738	200840	5	7	*	*	*	*	*	*	*	*	*	*	*	*	*	*	*	*	*	*	*	*	*	*	*	*	*	*	*	*	*	*	*	*	*	*	*	*	*	*	*	*
23	Quintana Roo	8	Solidaridad	544	Uolis Nah	872722	201306	5	7	*	*	*	*	*	*	*	*	*	*	*	*	*	*	*	*	*	*	*	*	*	*	*	*	*	*	*	*	*	*	*	*	*	*	*	*	*	*	*	*
23	Quintana Roo	8	Solidaridad	549	Tapia	871513	202919	5	1	*	*	*	*	*	*	*	*	*	*	*	*	*	*	*	*	*	*	*	*	*	*	*	*	*	*	*	*	*	*	*	*	*	*	*	*	*	*	*	*
23	Quintana Roo	8	Solidaridad	551	El Pedregal	865934	204426	10	7	*	*	*	*	*	*	*	*	*	*	*	*	*	*	*	*	*	*	*	*	*	*	*	*	*	*	*	*	*	*	*	*	*	*	*	*	*	*	*	*
23	Quintana Roo	8	Solidaridad	565	Chemuyil	872115	202030	5	33	17	16	4	1	3	8	3	5	0	18	10	8	2	4	2	2	2	16	14	8	6	1	5	14	8	6	13	8	5	0	0	0	0	0	0	106.25	1.5	12	4	1
23	Quintana Roo	8	Solidaridad	569	Almendras	870035	204320	10	5	*	*	*	*	*	*	*	*	*	*	*	*	*	*	*	*	*	*	*	*	*	*	*	*	*	*	*	*	*	*	*	*	*	*	*	*	*	*	*	*
23	Quintana Roo	8	Solidaridad	570	Artesanías Calavera	872728	201341	5	4	*	*	*	*	*	*	*	*	*	*	*	*	*	*	*	*	*	*	*	*	*	*	*	*	*	*	*	*	*	*	*	*	*	*	*	*	*	*	*	*
23	Quintana Roo	8	Solidaridad	571	Artesanías el Mexicano	872318	201703	5	2	*	*	*	*	*	*	*	*	*	*	*	*	*	*	*	*	*	*	*	*	*	*	*	*	*	*	*	*	*	*	*	*	*	*	*	*	*	*	*	*
23	Quintana Roo	8	Solidaridad	576	Casa del Sol	872838	194825	5	2	*	*	*	*	*	*	*	*	*	*	*	*	*	*	*	*	*	*	*	*	*	*	*	*	*	*	*	*	*	*	*	*	*	*	*	*	*	*	*	*
23	Quintana Roo	8	Solidaridad	577	Cavernas Chaac Actun	870723	203907	10	4	*	*	*	*	*	*	*	*	*	*	*	*	*	*	*	*	*	*	*	*	*	*	*	*	*	*	*	*	*	*	*	*	*	*	*	*	*	*	*	*
23	Quintana Roo	8	Solidaridad	579	Centro de Investigaciones Sian Ka'an	872855	200318	5	2	*	*	*	*	*	*	*	*	*	*	*	*	*	*	*	*	*	*	*	*	*	*	*	*	*	*	*	*	*	*	*	*	*	*	*	*	*	*	*	*
23	Quintana Roo	8	Solidaridad	583	Don Mauro	870711	203853	10	3	*	*	*	*	*	*	*	*	*	*	*	*	*	*	*	*	*	*	*	*	*	*	*	*	*	*	*	*	*	*	*	*	*	*	*	*	*	*	*	*
23	Quintana Roo	8	Solidaridad	584	Don Milo	870647	203846	10	3	*	*	*	*	*	*	*	*	*	*	*	*	*	*	*	*	*	*	*	*	*	*	*	*	*	*	*	*	*	*	*	*	*	*	*	*	*	*	*	*
23	Quintana Roo	8	Solidaridad	586	Galaxia Balam Tun	870239	204020	5	680	335	345	82	43	39	166	81	85	14	544	265	279	45	70	30	40	25	485	460	227	233	65	209	443	219	224	445	219	226	17	8	9	10	4	6	97.1	1.19	255	258	124
23	Quintana Roo	8	Solidaridad	588	La Guadalupana	870322	204115	5	5892	2990	2902	749	364	385	1478	721	757	114	3689	1899	1790	453	615	302	313	162	3122	2960	1542	1418	1067	1360	2936	1530	1406	2791	1461	1330	24	12	12	12	7	5	103.03	1.7	2164	1491	722
23	Quintana Roo	8	Solidaridad	589	Houston	872832	200520	5	2	*	*	*	*	*	*	*	*	*	*	*	*	*	*	*	*	*	*	*	*	*	*	*	*	*	*	*	*	*	*	*	*	*	*	*	*	*	*	*	*
23	Quintana Roo	8	Solidaridad	593	Localidad sin Nombre	870544	203705	5	4	*	*	*	*	*	*	*	*	*	*	*	*	*	*	*	*	*	*	*	*	*	*	*	*	*	*	*	*	*	*	*	*	*	*	*	*	*	*	*	*
23	Quintana Roo	8	Solidaridad	594	Localidad sin Nombre	871307	203049	5	9	*	*	*	*	*	*	*	*	*	*	*	*	*	*	*	*	*	*	*	*	*	*	*	*	*	*	*	*	*	*	*	*	*	*	*	*	*	*	*	*
23	Quintana Roo	8	Solidaridad	603	Pitayo	870237	204330	10	2	*	*	*	*	*	*	*	*	*	*	*	*	*	*	*	*	*	*	*	*	*	*	*	*	*	*	*	*	*	*	*	*	*	*	*	*	*	*	*	*
23	Quintana Roo	8	Solidaridad	605	Quimac-oloon	872628	201135	5	5	*	*	*	*	*	*	*	*	*	*	*	*	*	*	*	*	*	*	*	*	*	*	*	*	*	*	*	*	*	*	*	*	*	*	*	*	*	*	*	*
23	Quintana Roo	8	Solidaridad	606	Rancho Palomar	870632	203629	5	4	*	*	*	*	*	*	*	*	*	*	*	*	*	*	*	*	*	*	*	*	*	*	*	*	*	*	*	*	*	*	*	*	*	*	*	*	*	*	*	*
23	Quintana Roo	8	Solidaridad	608	Roberto Dzib Quiam	870708	203858	10	1	*	*	*	*	*	*	*	*	*	*	*	*	*	*	*	*	*	*	*	*	*	*	*	*	*	*	*	*	*	*	*	*	*	*	*	*	*	*	*	*
23	Quintana Roo	8	Solidaridad	609	San Carlos	870032	204324	10	4	*	*	*	*	*	*	*	*	*	*	*	*	*	*	*	*	*	*	*	*	*	*	*	*	*	*	*	*	*	*	*	*	*	*	*	*	*	*	*	*
23	Quintana Roo	8	Solidaridad	611	San Román	870722	203900	10	5	*	*	*	*	*	*	*	*	*	*	*	*	*	*	*	*	*	*	*	*	*	*	*	*	*	*	*	*	*	*	*	*	*	*	*	*	*	*	*	*
23	Quintana Roo	8	Solidaridad	613	Secret Capri	870053	204146	10	47	*	*	*	*	*	*	*	*	*	*	*	*	*	*	*	*	*	*	*	*	*	*	*	*	*	*	*	*	*	*	*	*	*	*	*	*	*	*	*	*
23	Quintana Roo	8	Solidaridad	614	Sol Maya	872249	201744	5	3	*	*	*	*	*	*	*	*	*	*	*	*	*	*	*	*	*	*	*	*	*	*	*	*	*	*	*	*	*	*	*	*	*	*	*	*	*	*	*	*
23	Quintana Roo	8	Solidaridad	615	Sunscape	872408	201508	5	5	*	*	*	*	*	*	*	*	*	*	*	*	*	*	*	*	*	*	*	*	*	*	*	*	*	*	*	*	*	*	*	*	*	*	*	*	*	*	*	*
23	Quintana Roo	8	Solidaridad	618	Tankah Paraíso	872252	201616	5	4	*	*	*	*	*	*	*	*	*	*	*	*	*	*	*	*	*	*	*	*	*	*	*	*	*	*	*	*	*	*	*	*	*	*	*	*	*	*	*	*
23	Quintana Roo	8	Solidaridad	622	Graciela Zapata Ravel	871154	203127	5	5	*	*	*	*	*	*	*	*	*	*	*	*	*	*	*	*	*	*	*	*	*	*	*	*	*	*	*	*	*	*	*	*	*	*	*	*	*	*	*	*
23	Quintana Roo	8	Solidaridad	623	José Dzib Quian	870651	203848	10	9	*	*	*	*	*	*	*	*	*	*	*	*	*	*	*	*	*	*	*	*	*	*	*	*	*	*	*	*	*	*	*	*	*	*	*	*	*	*	*	*
23	Quintana Roo	8	Solidaridad	626	Benito Quiam	870756	203928	10	3	*	*	*	*	*	*	*	*	*	*	*	*	*	*	*	*	*	*	*	*	*	*	*	*	*	*	*	*	*	*	*	*	*	*	*	*	*	*	*	*
23	Quintana Roo	8	Solidaridad	628	José Alberto Quiam Ucán	870810	203935	10	6	*	*	*	*	*	*	*	*	*	*	*	*	*	*	*	*	*	*	*	*	*	*	*	*	*	*	*	*	*	*	*	*	*	*	*	*	*	*	*	*
23	Quintana Roo	8	Solidaridad	629	Baltazar Aguilar	870752	203925	10	5	*	*	*	*	*	*	*	*	*	*	*	*	*	*	*	*	*	*	*	*	*	*	*	*	*	*	*	*	*	*	*	*	*	*	*	*	*	*	*	*
23	Quintana Roo	8	Solidaridad	631	Hacienda del Caribe	870838	203952	10	1	*	*	*	*	*	*	*	*	*	*	*	*	*	*	*	*	*	*	*	*	*	*	*	*	*	*	*	*	*	*	*	*	*	*	*	*	*	*	*	*
23	Quintana Roo	8	Solidaridad	632	Rufino Catzin	870854	203955	10	8	*	*	*	*	*	*	*	*	*	*	*	*	*	*	*	*	*	*	*	*	*	*	*	*	*	*	*	*	*	*	*	*	*	*	*	*	*	*	*	*
23	Quintana Roo	8	Solidaridad	633	El Sinaí	870925	204014	10	1	*	*	*	*	*	*	*	*	*	*	*	*	*	*	*	*	*	*	*	*	*	*	*	*	*	*	*	*	*	*	*	*	*	*	*	*	*	*	*	*
23	Quintana Roo	8	Solidaridad	634	Localidad sin Nombre	870933	204025	10	1	*	*	*	*	*	*	*	*	*	*	*	*	*	*	*	*	*	*	*	*	*	*	*	*	*	*	*	*	*	*	*	*	*	*	*	*	*	*	*	*
23	Quintana Roo	8	Solidaridad	635	San Manuel	870944	204025	10	1	*	*	*	*	*	*	*	*	*	*	*	*	*	*	*	*	*	*	*	*	*	*	*	*	*	*	*	*	*	*	*	*	*	*	*	*	*	*	*	*
23	Quintana Roo	8	Solidaridad	636	San Miguel	870949	204035	10	4	*	*	*	*	*	*	*	*	*	*	*	*	*	*	*	*	*	*	*	*	*	*	*	*	*	*	*	*	*	*	*	*	*	*	*	*	*	*	*	*
23	Quintana Roo	8	Solidaridad	637	Joaquín Rodríguez	871001	204035	10	2	*	*	*	*	*	*	*	*	*	*	*	*	*	*	*	*	*	*	*	*	*	*	*	*	*	*	*	*	*	*	*	*	*	*	*	*	*	*	*	*
23	Quintana Roo	8	Solidaridad	639	Las Palmas	870050	204518	10	5	*	*	*	*	*	*	*	*	*	*	*	*	*	*	*	*	*	*	*	*	*	*	*	*	*	*	*	*	*	*	*	*	*	*	*	*	*	*	*	*
23	Quintana Roo	8	Solidaridad	640	Vida y Esperanza	870214	204551	10	12	9	3	0	0	0	0	0	0	0	12	9	3	0	0	0	0	0	12	12	9	3	1	0	9	7	2	11	8	3	3	2	1	2	1	1	300	4.67	10	2	1
23	Quintana Roo	8	Solidaridad	680	Casa de Gozo	870101	204552	10	1	*	*	*	*	*	*	*	*	*	*	*	*	*	*	*	*	*	*	*	*	*	*	*	*	*	*	*	*	*	*	*	*	*	*	*	*	*	*	*	*
23	Quintana Roo	8	Solidaridad	681	Clara Aguilar Che	870804	203925	10	3	*	*	*	*	*	*	*	*	*	*	*	*	*	*	*	*	*	*	*	*	*	*	*	*	*	*	*	*	*	*	*	*	*	*	*	*	*	*	*	*
23	Quintana Roo	8	Solidaridad	682	Colonia Ejidal	872821	201214	10	56	32	24	9	5	4	25	15	10	3	46	27	19	9	13	8	5	4	34	30	17	13	8	12	28	16	12	24	15	9	2	1	1	2	1	1	133.33	3.14	44	2	2
23	Quintana Roo	8	Solidaridad	683	Discovery	871049	204405	10	4	*	*	*	*	*	*	*	*	*	*	*	*	*	*	*	*	*	*	*	*	*	*	*	*	*	*	*	*	*	*	*	*	*	*	*	*	*	*	*	*
23	Quintana Roo	8	Solidaridad	684	La Esmeralda	870052	204613	10	1	*	*	*	*	*	*	*	*	*	*	*	*	*	*	*	*	*	*	*	*	*	*	*	*	*	*	*	*	*	*	*	*	*	*	*	*	*	*	*	*
23	Quintana Roo	8	Solidaridad	685	Jacinto Aguilar Quiam	871052	204105	10	1	*	*	*	*	*	*	*	*	*	*	*	*	*	*	*	*	*	*	*	*	*	*	*	*	*	*	*	*	*	*	*	*	*	*	*	*	*	*	*	*
23	Quintana Roo	8	Solidaridad	687	Localidad sin Nombre	870545	203839	10	6	*	*	*	*	*	*	*	*	*	*	*	*	*	*	*	*	*	*	*	*	*	*	*	*	*	*	*	*	*	*	*	*	*	*	*	*	*	*	*	*
23	Quintana Roo	8	Solidaridad	691	Monte Sinaí	870048	204629	10	3	*	*	*	*	*	*	*	*	*	*	*	*	*	*	*	*	*	*	*	*	*	*	*	*	*	*	*	*	*	*	*	*	*	*	*	*	*	*	*	*
23	Quintana Roo	8	Solidaridad	693	El Palomar	870910	204002	10	5	*	*	*	*	*	*	*	*	*	*	*	*	*	*	*	*	*	*	*	*	*	*	*	*	*	*	*	*	*	*	*	*	*	*	*	*	*	*	*	*
23	Quintana Roo	8	Solidaridad	695	Posada Margherita	872706	200956	10	3	*	*	*	*	*	*	*	*	*	*	*	*	*	*	*	*	*	*	*	*	*	*	*	*	*	*	*	*	*	*	*	*	*	*	*	*	*	*	*	*
23	Quintana Roo	8	Solidaridad	696	Punta Piedra	872659	201011	10	7	3	4	0	0	0	0	0	0	0	7	3	4	0	0	0	0	0	7	7	3	4	0	3	6	2	4	7	3	4	1	1	0	0	0	0	75	5	3	4	2
23	Quintana Roo	8	Solidaridad	697	Rancho Caleta	872630	201127	10	3	*	*	*	*	*	*	*	*	*	*	*	*	*	*	*	*	*	*	*	*	*	*	*	*	*	*	*	*	*	*	*	*	*	*	*	*	*	*	*	*
23	Quintana Roo	8	Solidaridad	699	La Santísima	870056	204611	10	24	14	10	2	2	0	9	6	3	0	22	12	10	4	7	4	3	3	18	15	8	7	4	6	12	6	6	14	7	7	3	2	1	2	1	1	140	2.11	6	15	9
23	Quintana Roo	8	Solidaridad	9998	Localidades de una vivienda				2170	1449	721	45	28	17	116	70	46	5	2076	1394	682	44	66	38	28	22	2027	2005	1352	653	565	619	1947	1305	642	1955	1317	638	58	47	11	33	27	6	200.97	0.94	1078	208	137
23	Quintana Roo	8	Solidaridad	9999	Localidades de dos viviendas				488	412	76	16	11	5	42	27	15	5	457	394	63	14	21	14	7	7	438	431	378	53	135	46	409	360	49	416	365	51	22	18	4	13	11	2	542.11	2.07	310	133	127
[truncated: 80 more columns]
