# Supplementary material
Source: MDPI journal article supplement (https://www.mdpi.com/1424-2818/12/9/338)
Supplement: s1 [file s1 › Supplementary material/S5_2010_Pob_INEGI_ITER.xlsx]

## Sheet: 2010_Pob_INEGI_ITER
entidad	nom_ent	mun	nom_mun	loc	nom_loc	longitud	latitud	altitud	pobtot	pobmas	pobfem	p_0a2	p_0a2_m	p_0a2_f	p_3ymas	p_3ymas_m	p_3ymas_f	p_5ymas	p_5ymas_m	p_5ymas_f	p_12ymas	p_12ymas_m	p_12ymas_f	p_15ymas	p_15ymas_m	p_15ymas_f	p_18ymas	p_18ymas_m	p_18ymas_f	p_3a5	p_3a5_m	p_3a5_f	p_6a11	p_6a11_m	p_6a11_f	p_8a14	p_8a14_m	p_8a14_f	p_12a14	p_12a14_m	p_12a14_f	p_15a17	p_15a17_m	p_15a17_f	p_18a24	p_18a24_m	p_18a24_f	p_15a49_f	p_60ymas
23	Quintana Roo	0	Total de la entidad Quintana Roo	0	Total de la Entidad				1325578	673220	652358	78628	40092	38536	1227759	623441	604318	1173159	595830	577329	996474	506178	490296	924855	469889	454966	848755	431329	417426	80118	40568	39550	151167	76695	74472	172235	87424	84811	71619	36289	35330	76100	38560	37540	188099	95370	92729	383279	63965
23	Quintana Roo	0	Total de la entidad Quintana Roo	9998	Localidades de una vivienda				4252	2781	1471	183	98	85	3983	2637	1346	3849	2568	1281	3469	2365	1104	3326	2278	1048	3160	2184	976	196	104	92	318	168	150	359	207	152	143	87	56	166	94	72	620	404	216	798	538
23	Quintana Roo	0	Total de la entidad Quintana Roo	9999	Localidades de dos viviendas				1016	584	432	61	23	38	948	558	390	896	538	358	771	470	301	720	445	275	675	419	256	72	31	41	105	57	48	117	62	55	51	25	26	45	26	19	129	72	57	199	117
23	Quintana Roo	1	Cozumel	0	Total del Municipio				79535	40357	39178	4363	2240	2123	74339	37694	36645	71208	36141	35067	60313	30684	29629	55938	28492	27446	51526	26238	25288	4698	2316	2382	9328	4694	4634	10671	5348	5323	4375	2192	2183	4412	2254	2158	9994	5004	4990	22655	4190
23	Quintana Roo	1	Cozumel	1	Cozumel	865630	203100	1	77236	39113	38123	4238	2181	2057	72211	36532	35679	69170	35018	34152	58650	29755	28895	54403	27636	26767	50104	25445	24659	4564	2254	2310	8997	4523	4474	10312	5156	5156	4247	2119	2128	4299	2191	2108	9729	4867	4862	22086	4050
23	Quintana Roo	1	Cozumel	57	Las Palmitas	870105	202306	1	4	*	*	*	*	*	*	*	*	*	*	*	*	*	*	*	*	*	*	*	*	*	*	*	*	*	*	*	*	*	*	*	*	*	*	*	*	*	*	*	*
23	Quintana Roo	1	Cozumel	67	El Cedral	865938	202157	8	15	7	8	0	0	0	15	7	8	15	7	8	15	7	8	14	7	7	14	7	7	0	0	0	0	0	0	1	0	1	1	0	1	0	0	0	1	1	0	0	7
23	Quintana Roo	1	Cozumel	122	Punta Morena	865128	202411	1	2	*	*	*	*	*	*	*	*	*	*	*	*	*	*	*	*	*	*	*	*	*	*	*	*	*	*	*	*	*	*	*	*	*	*	*	*	*	*	*	*
23	Quintana Roo	1	Cozumel	232	Santa Rita	865417	202826	7	15	9	6	3	2	1	12	7	5	12	7	5	12	7	5	11	6	5	9	6	3	0	0	0	0	0	0	1	1	0	1	1	0	2	0	2	5	4	1	5	0
23	Quintana Roo	1	Cozumel	265	Presidente Intercontinental	865856	202752	2	3	*	*	*	*	*	*	*	*	*	*	*	*	*	*	*	*	*	*	*	*	*	*	*	*	*	*	*	*	*	*	*	*	*	*	*	*	*	*	*	*
23	Quintana Roo	1	Cozumel	305	San Jorge	865257	202718	9	1	*	*	*	*	*	*	*	*	*	*	*	*	*	*	*	*	*	*	*	*	*	*	*	*	*	*	*	*	*	*	*	*	*	*	*	*	*	*	*	*
23	Quintana Roo	1	Cozumel	317	San Pedro	865453	202858	6	1	*	*	*	*	*	*	*	*	*	*	*	*	*	*	*	*	*	*	*	*	*	*	*	*	*	*	*	*	*	*	*	*	*	*	*	*	*	*	*	*
23	Quintana Roo	1	Cozumel	333	Santa Teresa	865502	202902	6	5	*	*	*	*	*	*	*	*	*	*	*	*	*	*	*	*	*	*	*	*	*	*	*	*	*	*	*	*	*	*	*	*	*	*	*	*	*	*	*	*
23	Quintana Roo	1	Cozumel	380	El Bosque	865449	202858	6	10	*	*	*	*	*	*	*	*	*	*	*	*	*	*	*	*	*	*	*	*	*	*	*	*	*	*	*	*	*	*	*	*	*	*	*	*	*	*	*	*
23	Quintana Roo	1	Cozumel	402	La Cotita	865229	202657	10	6	5	1	0	0	0	6	5	1	6	5	1	4	3	1	4	3	1	4	3	1	0	0	0	2	2	0	2	2	0	0	0	0	0	0	0	0	0	0	1	0
23	Quintana Roo	1	Cozumel	418	María Luisa	865242	203040	1	2	*	*	*	*	*	*	*	*	*	*	*	*	*	*	*	*	*	*	*	*	*	*	*	*	*	*	*	*	*	*	*	*	*	*	*	*	*	*	*	*
23	Quintana Roo	1	Cozumel	419	Cerro Chumul	865219	202315	1	1	*	*	*	*	*	*	*	*	*	*	*	*	*	*	*	*	*	*	*	*	*	*	*	*	*	*	*	*	*	*	*	*	*	*	*	*	*	*	*	*
23	Quintana Roo	1	Cozumel	426	La Estrella	865439	202839	7	154	77	77	7	4	3	147	73	74	139	70	69	104	52	52	97	49	48	89	46	43	11	4	7	32	17	15	28	13	15	7	3	4	8	3	5	10	2	8	39	12
23	Quintana Roo	1	Cozumel	427	San Pedro	865427	202927	4	3	*	*	*	*	*	*	*	*	*	*	*	*	*	*	*	*	*	*	*	*	*	*	*	*	*	*	*	*	*	*	*	*	*	*	*	*	*	*	*	*
23	Quintana Roo	1	Cozumel	432	Gallo de Oro	865208	202635	10	4	*	*	*	*	*	*	*	*	*	*	*	*	*	*	*	*	*	*	*	*	*	*	*	*	*	*	*	*	*	*	*	*	*	*	*	*	*	*	*	*
23	Quintana Roo	1	Cozumel	456	Sol Estéreo	865349	202802	8	1	*	*	*	*	*	*	*	*	*	*	*	*	*	*	*	*	*	*	*	*	*	*	*	*	*	*	*	*	*	*	*	*	*	*	*	*	*	*	*	*
23	Quintana Roo	1	Cozumel	457	Santa Magdalena	865439	202906	5	17	7	10	3	0	3	14	7	7	12	7	5	9	5	4	9	5	4	9	5	4	2	0	2	3	2	1	2	1	1	0	0	0	0	0	0	2	1	1	4	0
23	Quintana Roo	1	Cozumel	458	Lindavista	865441	202904	5	13	7	6	0	0	0	13	7	6	13	7	6	9	5	4	8	5	3	7	5	2	0	0	0	4	2	2	4	1	3	1	0	1	1	0	1	1	1	0	3	0
23	Quintana Roo	1	Cozumel	459	San Lorenzo	865456	202900	6	134	68	66	5	3	2	126	64	62	119	59	60	90	45	45	84	42	42	78	39	39	11	7	4	25	12	13	22	13	9	6	3	3	6	3	3	25	12	13	36	8
23	Quintana Roo	1	Cozumel	462	Los Pinos	865456	202857	6	1	*	*	*	*	*	*	*	*	*	*	*	*	*	*	*	*	*	*	*	*	*	*	*	*	*	*	*	*	*	*	*	*	*	*	*	*	*	*	*	*
23	Quintana Roo	1	Cozumel	468	San Carlos	865139	202615	9	2	*	*	*	*	*	*	*	*	*	*	*	*	*	*	*	*	*	*	*	*	*	*	*	*	*	*	*	*	*	*	*	*	*	*	*	*	*	*	*	*
23	Quintana Roo	1	Cozumel	474	Kilómetro Cinco	865443	202846	6	1	*	*	*	*	*	*	*	*	*	*	*	*	*	*	*	*	*	*	*	*	*	*	*	*	*	*	*	*	*	*	*	*	*	*	*	*	*	*	*	*
23	Quintana Roo	1	Cozumel	480	Rancho Lulú	865137	202626	9	1	*	*	*	*	*	*	*	*	*	*	*	*	*	*	*	*	*	*	*	*	*	*	*	*	*	*	*	*	*	*	*	*	*	*	*	*	*	*	*	*
23	Quintana Roo	1	Cozumel	494	Nuestra Señora de Guadalupe	865302	202724	8	1	*	*	*	*	*	*	*	*	*	*	*	*	*	*	*	*	*	*	*	*	*	*	*	*	*	*	*	*	*	*	*	*	*	*	*	*	*	*	*	*
23	Quintana Roo	1	Cozumel	498	Palmar Primero	865859	202718	7	13	8	5	1	1	0	11	6	5	10	6	4	9	5	4	8	4	4	8	4	4	1	0	1	1	1	0	1	1	0	1	1	0	0	0	0	1	0	1	3	0
23	Quintana Roo	1	Cozumel	515	Rancho Argüelles	865217	202645	10	1	*	*	*	*	*	*	*	*	*	*	*	*	*	*	*	*	*	*	*	*	*	*	*	*	*	*	*	*	*	*	*	*	*	*	*	*	*	*	*	*
23	Quintana Roo	1	Cozumel	546	Paloma Negra	865441	202845	6	14	6	8	1	0	1	13	6	7	13	6	7	10	5	5	10	5	5	9	4	5	0	0	0	3	1	2	2	1	1	0	0	0	1	1	0	4	2	2	4	2
23	Quintana Roo	1	Cozumel	570	San Ramón	865454	202909	5	4	*	*	*	*	*	*	*	*	*	*	*	*	*	*	*	*	*	*	*	*	*	*	*	*	*	*	*	*	*	*	*	*	*	*	*	*	*	*	*	*
23	Quintana Roo	1	Cozumel	571	San Ramón	865421	202826	7	3	*	*	*	*	*	*	*	*	*	*	*	*	*	*	*	*	*	*	*	*	*	*	*	*	*	*	*	*	*	*	*	*	*	*	*	*	*	*	*	*
23	Quintana Roo	1	Cozumel	576	La Milpa	865425	202832	7	2	*	*	*	*	*	*	*	*	*	*	*	*	*	*	*	*	*	*	*	*	*	*	*	*	*	*	*	*	*	*	*	*	*	*	*	*	*	*	*	*
23	Quintana Roo	1	Cozumel	580	El Pedregal de San Miguel	865422	202829	7	5	*	*	*	*	*	*	*	*	*	*	*	*	*	*	*	*	*	*	*	*	*	*	*	*	*	*	*	*	*	*	*	*	*	*	*	*	*	*	*	*
23	Quintana Roo	1	Cozumel	581	Los Laureles	865448	202851	6	15	6	9	1	0	1	14	6	8	14	6	8	10	5	5	10	5	5	10	5	5	1	0	1	3	1	2	2	1	1	0	0	0	0	0	0	1	1	0	3	2
23	Quintana Roo	1	Cozumel	593	Windam	870057	202426	1	4	3	1	0	0	0	4	3	1	4	3	1	4	3	1	4	3	1	4	3	1	0	0	0	0	0	0	0	0	0	0	0	0	0	0	0	0	0	0	1	1
23	Quintana Roo	1	Cozumel	595	San Bartolo	870036	202213	1	1	*	*	*	*	*	*	*	*	*	*	*	*	*	*	*	*	*	*	*	*	*	*	*	*	*	*	*	*	*	*	*	*	*	*	*	*	*	*	*	*
23	Quintana Roo	1	Cozumel	616	San Anselmo	865443	202902	5	19	12	7	1	0	1	18	12	6	18	12	6	12	7	5	11	6	5	10	5	5	1	1	0	5	4	1	5	4	1	1	1	0	1	1	0	1	1	0	4	0
23	Quintana Roo	1	Cozumel	617	Ramonales	865301	202718	9	5	*	*	*	*	*	*	*	*	*	*	*	*	*	*	*	*	*	*	*	*	*	*	*	*	*	*	*	*	*	*	*	*	*	*	*	*	*	*	*	*
23	Quintana Roo	1	Cozumel	628	San Carlos	865429	202836	7	34	17	17	0	0	0	31	16	15	30	16	14	24	13	11	24	13	11	23	13	10	1	0	1	6	3	3	4	2	2	0	0	0	1	0	1	6	3	3	10	2
23	Quintana Roo	1	Cozumel	735	La Amistad	865445	202848	6	6	*	*	*	*	*	*	*	*	*	*	*	*	*	*	*	*	*	*	*	*	*	*	*	*	*	*	*	*	*	*	*	*	*	*	*	*	*	*	*	*
23	Quintana Roo	1	Cozumel	738	Cabaña del Pescador	865542	203248	1	5	*	*	*	*	*	*	*	*	*	*	*	*	*	*	*	*	*	*	*	*	*	*	*	*	*	*	*	*	*	*	*	*	*	*	*	*	*	*	*	*
23	Quintana Roo	1	Cozumel	741	Paso María	865821	202802	6	1	*	*	*	*	*	*	*	*	*	*	*	*	*	*	*	*	*	*	*	*	*	*	*	*	*	*	*	*	*	*	*	*	*	*	*	*	*	*	*	*
23	Quintana Roo	1	Cozumel	745	Chichihualco	865553	203225	1	5	*	*	*	*	*	*	*	*	*	*	*	*	*	*	*	*	*	*	*	*	*	*	*	*	*	*	*	*	*	*	*	*	*	*	*	*	*	*	*	*
23	Quintana Roo	1	Cozumel	746	Xkaliahche	865946	202109	7	1	*	*	*	*	*	*	*	*	*	*	*	*	*	*	*	*	*	*	*	*	*	*	*	*	*	*	*	*	*	*	*	*	*	*	*	*	*	*	*	*
23	Quintana Roo	1	Cozumel	749	Allegro Resort Cozumel	870110	202251	1	1	*	*	*	*	*	*	*	*	*	*	*	*	*	*	*	*	*	*	*	*	*	*	*	*	*	*	*	*	*	*	*	*	*	*	*	*	*	*	*	*
23	Quintana Roo	1	Cozumel	754	Huerto Familiar	865811	202823	4	104	49	55	2	1	1	99	47	52	95	45	50	77	37	40	71	36	35	64	33	31	9	5	4	13	5	8	14	4	10	6	1	5	7	3	4	11	5	6	28	10
23	Quintana Roo	1	Cozumel	764	Ubaldo Verde	865204	202640	9	2	*	*	*	*	*	*	*	*	*	*	*	*	*	*	*	*	*	*	*	*	*	*	*	*	*	*	*	*	*	*	*	*	*	*	*	*	*	*	*	*
23	Quintana Roo	1	Cozumel	766	Edilberto Sosa León	865300	202722	8	4	*	*	*	*	*	*	*	*	*	*	*	*	*	*	*	*	*	*	*	*	*	*	*	*	*	*	*	*	*	*	*	*	*	*	*	*	*	*	*	*
23	Quintana Roo	1	Cozumel	768	Kilómetro Ocho y Medio	865314	202733	8	4	*	*	*	*	*	*	*	*	*	*	*	*	*	*	*	*	*	*	*	*	*	*	*	*	*	*	*	*	*	*	*	*	*	*	*	*	*	*	*	*
23	Quintana Roo	1	Cozumel	770	Rancho Mayen	865444	202903	5	4	*	*	*	*	*	*	*	*	*	*	*	*	*	*	*	*	*	*	*	*	*	*	*	*	*	*	*	*	*	*	*	*	*	*	*	*	*	*	*	*
23	Quintana Roo	1	Cozumel	771	Roberto Tzuc Poot	865442	202906	5	3	*	*	*	*	*	*	*	*	*	*	*	*	*	*	*	*	*	*	*	*	*	*	*	*	*	*	*	*	*	*	*	*	*	*	*	*	*	*	*	*
23	Quintana Roo	1	Cozumel	774	Rancho Tamaulipas	865419	202938	3	3	*	*	*	*	*	*	*	*	*	*	*	*	*	*	*	*	*	*	*	*	*	*	*	*	*	*	*	*	*	*	*	*	*	*	*	*	*	*	*	*
23	Quintana Roo	1	Cozumel	775	San Patricio	865459	202903	6	6	5	1	0	0	0	6	5	1	6	5	1	6	5	1	5	5	0	2	2	0	0	0	0	0	0	0	1	0	1	1	0	1	3	3	0	0	0	0	0	0
23	Quintana Roo	1	Cozumel	776	Rancho Real	865510	202913	5	7	*	*	*	*	*	*	*	*	*	*	*	*	*	*	*	*	*	*	*	*	*	*	*	*	*	*	*	*	*	*	*	*	*	*	*	*	*	*	*	*
23	Quintana Roo	1	Cozumel	777	Plantas y Jardines	865520	202920	5	9	5	4	0	0	0	9	5	4	9	5	4	7	5	2	7	5	2	7	5	2	0	0	0	2	0	2	2	0	2	0	0	0	0	0	0	0	0	0	1	2
23	Quintana Roo	1	Cozumel	787	Irimar	865932	202629	3	1	*	*	*	*	*	*	*	*	*	*	*	*	*	*	*	*	*	*	*	*	*	*	*	*	*	*	*	*	*	*	*	*	*	*	*	*	*	*	*	*
23	Quintana Roo	1	Cozumel	788	Kilómetro Doce	865143	202636	8	5	*	*	*	*	*	*	*	*	*	*	*	*	*	*	*	*	*	*	*	*	*	*	*	*	*	*	*	*	*	*	*	*	*	*	*	*	*	*	*	*
23	Quintana Roo	1	Cozumel	793	Las Palmeras	865447	202850	6	72	41	31	5	0	5	64	39	25	61	38	23	44	26	18	41	24	17	40	24	16	4	2	2	16	11	5	15	11	4	3	2	1	1	0	1	5	4	1	14	3
23	Quintana Roo	1	Cozumel	797	Los Pinos	865414	202946	3	6	*	*	*	*	*	*	*	*	*	*	*	*	*	*	*	*	*	*	*	*	*	*	*	*	*	*	*	*	*	*	*	*	*	*	*	*	*	*	*	*
23	Quintana Roo	1	Cozumel	800	Pueblo Nuevo	865735	202730	9	17	13	4	0	0	0	14	12	2	13	11	2	12	10	2	12	10	2	12	10	2	1	1	0	1	1	0	1	1	0	0	0	0	0	0	0	1	1	0	2	2
23	Quintana Roo	1	Cozumel	802	Rancho Jesús	865955	202319	5	7	*	*	*	*	*	*	*	*	*	*	*	*	*	*	*	*	*	*	*	*	*	*	*	*	*	*	*	*	*	*	*	*	*	*	*	*	*	*	*	*
23	Quintana Roo	1	Cozumel	804	San Agustín	865443	202905	5	15	8	7	1	1	0	14	7	7	14	7	7	9	5	4	8	4	4	8	4	4	0	0	0	5	2	3	5	3	2	1	1	0	0	0	0	2	1	1	4	1
23	Quintana Roo	1	Cozumel	810	San Manuel	865306	202726	8	14	10	4	0	0	0	14	10	4	13	9	4	9	7	2	8	6	2	8	6	2	2	2	0	3	1	2	3	1	2	1	1	0	0	0	0	1	1	0	1	2
23	Quintana Roo	1	Cozumel	811	San Miguel	865823	202820	3	1	*	*	*	*	*	*	*	*	*	*	*	*	*	*	*	*	*	*	*	*	*	*	*	*	*	*	*	*	*	*	*	*	*	*	*	*	*	*	*	*
23	Quintana Roo	1	Cozumel	812	Dos Arbolitos	865441	202908	5	44	27	17	2	1	1	42	26	16	41	26	15	34	20	14	31	18	13	27	14	13	1	0	1	7	6	1	8	6	2	3	2	1	4	4	0	6	3	3	13	0
23	Quintana Roo	1	Cozumel	813	San Miguel	865411	202950	2	3	*	*	*	*	*	*	*	*	*	*	*	*	*	*	*	*	*	*	*	*	*	*	*	*	*	*	*	*	*	*	*	*	*	*	*	*	*	*	*	*
23	Quintana Roo	1	Cozumel	815	San Vicente	865439	202907	5	2	*	*	*	*	*	*	*	*	*	*	*	*	*	*	*	*	*	*	*	*	*	*	*	*	*	*	*	*	*	*	*	*	*	*	*	*	*	*	*	*
23	Quintana Roo	1	Cozumel	816	Javier Escalante	865527	202926	4	5	*	*	*	*	*	*	*	*	*	*	*	*	*	*	*	*	*	*	*	*	*	*	*	*	*	*	*	*	*	*	*	*	*	*	*	*	*	*	*	*
23	Quintana Roo	1	Cozumel	817	Doña Agustina	865944	202334	7	1	*	*	*	*	*	*	*	*	*	*	*	*	*	*	*	*	*	*	*	*	*	*	*	*	*	*	*	*	*	*	*	*	*	*	*	*	*	*	*	*
23	Quintana Roo	1	Cozumel	818	Santa Cecilia	865124	202607	9	8	*	*	*	*	*	*	*	*	*	*	*	*	*	*	*	*	*	*	*	*	*	*	*	*	*	*	*	*	*	*	*	*	*	*	*	*	*	*	*	*
23	Quintana Roo	1	Cozumel	820	Santa María	865234	202704	9	7	7	0	0	0	0	7	7	0	7	7	0	7	7	0	7	7	0	7	7	0	0	0	0	0	0	0	0	0	0	0	0	0	0	0	0	1	1	0	0	2
23	Quintana Roo	1	Cozumel	825	La Herradura	865350	203215	1	1	*	*	*	*	*	*	*	*	*	*	*	*	*	*	*	*	*	*	*	*	*	*	*	*	*	*	*	*	*	*	*	*	*	*	*	*	*	*	*	*
23	Quintana Roo	1	Cozumel	837	San Antonio	865246	203039	1	1	*	*	*	*	*	*	*	*	*	*	*	*	*	*	*	*	*	*	*	*	*	*	*	*	*	*	*	*	*	*	*	*	*	*	*	*	*	*	*	*
23	Quintana Roo	1	Cozumel	840	San Cipriano	865519	202919	5	13	*	*	*	*	*	*	*	*	*	*	*	*	*	*	*	*	*	*	*	*	*	*	*	*	*	*	*	*	*	*	*	*	*	*	*	*	*	*	*	*
23	Quintana Roo	1	Cozumel	845	Buena Esperanza	865434	202828	7	8	*	*	*	*	*	*	*	*	*	*	*	*	*	*	*	*	*	*	*	*	*	*	*	*	*	*	*	*	*	*	*	*	*	*	*	*	*	*	*	*
23	Quintana Roo	1	Cozumel	854	La Esperanza	865432	202836	7	115	62	53	12	5	7	100	55	45	95	52	43	73	39	34	66	36	30	62	33	29	8	6	2	19	10	9	21	10	11	7	3	4	4	3	1	7	3	4	28	2
23	Quintana Roo	1	Cozumel	855	La Estrella	865446	202857	6	16	8	8	3	2	1	13	6	7	12	6	6	10	5	5	9	4	5	9	4	5	2	0	2	1	1	0	2	2	0	1	1	0	0	0	0	2	0	2	4	0
23	Quintana Roo	1	Cozumel	858	Kilómetro Cuatro y Medio	865515	202855	6	211	113	98	10	7	3	198	104	94	190	98	92	158	84	74	136	71	65	125	64	61	15	10	5	25	10	15	40	20	20	22	13	9	11	7	4	27	13	14	56	11
23	Quintana Roo	1	Cozumel	859	Maya Luum	865207	202638	9	3	*	*	*	*	*	*	*	*	*	*	*	*	*	*	*	*	*	*	*	*	*	*	*	*	*	*	*	*	*	*	*	*	*	*	*	*	*	*	*	*
23	Quintana Roo	1	Cozumel	861	Iberostar	870114	202213	1	52	33	19	2	1	1	50	32	18	50	32	18	50	32	18	50	32	18	50	32	18	0	0	0	0	0	0	0	0	0	0	0	0	0	0	0	19	12	7	18	0
23	Quintana Roo	1	Cozumel	862	Iguanas Ranas	870059	202435	1	9	4	5	0	0	0	9	4	5	9	4	5	8	4	4	6	3	3	6	3	3	0	0	0	1	0	1	3	1	2	2	1	1	0	0	0	0	0	0	3	0
23	Quintana Roo	1	Cozumel	872	Jorge Humberto Gamboa	865440	202905	5	4	*	*	*	*	*	*	*	*	*	*	*	*	*	*	*	*	*	*	*	*	*	*	*	*	*	*	*	*	*	*	*	*	*	*	*	*	*	*	*	*
23	Quintana Roo	1	Cozumel	873	Jorge Ortega	865602	203225	0	8	*	*	*	*	*	*	*	*	*	*	*	*	*	*	*	*	*	*	*	*	*	*	*	*	*	*	*	*	*	*	*	*	*	*	*	*	*	*	*	*
23	Quintana Roo	1	Cozumel	874	Laguna Ciega	865251	203238	0	1	*	*	*	*	*	*	*	*	*	*	*	*	*	*	*	*	*	*	*	*	*	*	*	*	*	*	*	*	*	*	*	*	*	*	*	*	*	*	*	*
23	Quintana Roo	1	Cozumel	876	La Media Luna	865247	202718	9	5	*	*	*	*	*	*	*	*	*	*	*	*	*	*	*	*	*	*	*	*	*	*	*	*	*	*	*	*	*	*	*	*	*	*	*	*	*	*	*	*
23	Quintana Roo	1	Cozumel	878	Nachi Cocom	870118	202302	0	1	*	*	*	*	*	*	*	*	*	*	*	*	*	*	*	*	*	*	*	*	*	*	*	*	*	*	*	*	*	*	*	*	*	*	*	*	*	*	*	*
23	Quintana Roo	1	Cozumel	887	Rancho Alegre	865307	203029	1	3	*	*	*	*	*	*	*	*	*	*	*	*	*	*	*	*	*	*	*	*	*	*	*	*	*	*	*	*	*	*	*	*	*	*	*	*	*	*	*	*
23	Quintana Roo	1	Cozumel	891	Villa Cozumel	865459	202911	5	75	42	33	6	5	1	60	33	27	56	33	23	45	26	19	42	23	19	39	21	18	5	0	5	10	7	3	11	9	2	3	3	0	3	2	1	11	6	5	16	0
23	Quintana Roo	1	Cozumel	893	San Vicente	865415	202943	3	1	*	*	*	*	*	*	*	*	*	*	*	*	*	*	*	*	*	*	*	*	*	*	*	*	*	*	*	*	*	*	*	*	*	*	*	*	*	*	*	*
23	Quintana Roo	1	Cozumel	894	Santa Teresa	865417	202941	3	4	*	*	*	*	*	*	*	*	*	*	*	*	*	*	*	*	*	*	*	*	*	*	*	*	*	*	*	*	*	*	*	*	*	*	*	*	*	*	*	*
23	Quintana Roo	1	Cozumel	898	El Curvato	865138	202714	7	1	*	*	*	*	*	*	*	*	*	*	*	*	*	*	*	*	*	*	*	*	*	*	*	*	*	*	*	*	*	*	*	*	*	*	*	*	*	*	*	*
23	Quintana Roo	1	Cozumel	901	Yumka	865421	202934	3	4	*	*	*	*	*	*	*	*	*	*	*	*	*	*	*	*	*	*	*	*	*	*	*	*	*	*	*	*	*	*	*	*	*	*	*	*	*	*	*	*
23	Quintana Roo	1	Cozumel	907	Casa Tunich	870050	202456	1	2	*	*	*	*	*	*	*	*	*	*	*	*	*	*	*	*	*	*	*	*	*	*	*	*	*	*	*	*	*	*	*	*	*	*	*	*	*	*	*	*
23	Quintana Roo	1	Cozumel	917	Juan Leyenda Trigo	865432	202915	5	9	*	*	*	*	*	*	*	*	*	*	*	*	*	*	*	*	*	*	*	*	*	*	*	*	*	*	*	*	*	*	*	*	*	*	*	*	*	*	*	*
23	Quintana Roo	1	Cozumel	919	Casa Gordon	870126	202149	1	1	*	*	*	*	*	*	*	*	*	*	*	*	*	*	*	*	*	*	*	*	*	*	*	*	*	*	*	*	*	*	*	*	*	*	*	*	*	*	*	*
23	Quintana Roo	1	Cozumel	925	San Ángel	865450	202856	6	5	*	*	*	*	*	*	*	*	*	*	*	*	*	*	*	*	*	*	*	*	*	*	*	*	*	*	*	*	*	*	*	*	*	*	*	*	*	*	*	*
23	Quintana Roo	1	Cozumel	926	Casa de las Flores	870057	202442	1	1	*	*	*	*	*	*	*	*	*	*	*	*	*	*	*	*	*	*	*	*	*	*	*	*	*	*	*	*	*	*	*	*	*	*	*	*	*	*	*	*
23	Quintana Roo	1	Cozumel	929	Ninguno	865515	202917	5	2	*	*	*	*	*	*	*	*	*	*	*	*	*	*	*	*	*	*	*	*	*	*	*	*	*	*	*	*	*	*	*	*	*	*	*	*	*	*	*	*
23	Quintana Roo	1	Cozumel	932	Las Fincas	865458	202953	2	746	386	360	41	18	23	690	360	330	656	347	309	533	287	246	487	260	227	441	235	206	43	16	27	114	57	57	122	62	60	46	27	19	46	25	21	83	46	37	194	30
23	Quintana Roo	1	Cozumel	933	Holliday Cozumel	865927	202648	1	6	*	*	*	*	*	*	*	*	*	*	*	*	*	*	*	*	*	*	*	*	*	*	*	*	*	*	*	*	*	*	*	*	*	*	*	*	*	*	*	*
23	Quintana Roo	1	Cozumel	934	Ninguno	870106	202349	1	1	*	*	*	*	*	*	*	*	*	*	*	*	*	*	*	*	*	*	*	*	*	*	*	*	*	*	*	*	*	*	*	*	*	*	*	*	*	*	*	*
23	Quintana Roo	1	Cozumel	935	Ninguno	870055	202448	1	1	*	*	*	*	*	*	*	*	*	*	*	*	*	*	*	*	*	*	*	*	*	*	*	*	*	*	*	*	*	*	*	*	*	*	*	*	*	*	*	*
23	Quintana Roo	1	Cozumel	938	Residencias Reef	870100	202420	1	4	4	0	0	0	0	4	4	0	4	4	0	4	4	0	4	4	0	4	4	0	0	0	0	0	0	0	0	0	0	0	0	0	0	0	0	0	0	0	0	2
23	Quintana Roo	1	Cozumel	939	Las Uvas	865922	202648	2	5	*	*	*	*	*	*	*	*	*	*	*	*	*	*	*	*	*	*	*	*	*	*	*	*	*	*	*	*	*	*	*	*	*	*	*	*	*	*	*	*
23	Quintana Roo	1	Cozumel	940	Las Ventanas	870059	202431	1	4	*	*	*	*	*	*	*	*	*	*	*	*	*	*	*	*	*	*	*	*	*	*	*	*	*	*	*	*	*	*	*	*	*	*	*	*	*	*	*	*
23	Quintana Roo	1	Cozumel	941	Villa Dos	870104	202357	1	13	5	8	0	0	0	13	5	8	13	5	8	11	4	7	10	4	6	9	4	5	1	1	0	1	0	1	1	0	1	1	0	1	1	0	1	1	0	1	5	0
23	Quintana Roo	1	Cozumel	942	Villa Tikal	870052	202453	1	5	*	*	*	*	*	*	*	*	*	*	*	*	*	*	*	*	*	*	*	*	*	*	*	*	*	*	*	*	*	*	*	*	*	*	*	*	*	*	*	*
23	Quintana Roo	1	Cozumel	944	Cozumeleño	865233	202659	10	6	4	2	0	0	0	6	4	2	6	4	2	6	4	2	6	4	2	6	4	2	0	0	0	0	0	0	0	0	0	0	0	0	0	0	0	3	2	1	1	1
23	Quintana Roo	1	Cozumel	949	La Huerta	865431	202841	6	3	*	*	*	*	*	*	*	*	*	*	*	*	*	*	*	*	*	*	*	*	*	*	*	*	*	*	*	*	*	*	*	*	*	*	*	*	*	*	*	*
23	Quintana Roo	1	Cozumel	950	Kilómetro Ocho y Medio	865925	202649	2	6	*	*	*	*	*	*	*	*	*	*	*	*	*	*	*	*	*	*	*	*	*	*	*	*	*	*	*	*	*	*	*	*	*	*	*	*	*	*	*	*
23	Quintana Roo	1	Cozumel	955	Rancho Enríquez	865207	202643	9	6	*	*	*	*	*	*	*	*	*	*	*	*	*	*	*	*	*	*	*	*	*	*	*	*	*	*	*	*	*	*	*	*	*	*	*	*	*	*	*	*
23	Quintana Roo	1	Cozumel	956	Rancho Palomo	865212	202643	10	3	*	*	*	*	*	*	*	*	*	*	*	*	*	*	*	*	*	*	*	*	*	*	*	*	*	*	*	*	*	*	*	*	*	*	*	*	*	*	*	*
23	Quintana Roo	1	Cozumel	957	El Refugio	865311	202732	8	1	*	*	*	*	*	*	*	*	*	*	*	*	*	*	*	*	*	*	*	*	*	*	*	*	*	*	*	*	*	*	*	*	*	*	*	*	*	*	*	*
23	Quintana Roo	1	Cozumel	961	Bosh Balam	865448	202853	6	6	4	2	0	0	0	6	4	2	6	4	2	6	4	2	6	4	2	6	4	2	0	0	0	0	0	0	0	0	0	0	0	0	0	0	0	0	0	0	1	0
23	Quintana Roo	1	Cozumel	962	De los Santos	865156	202633	9	4	*	*	*	*	*	*	*	*	*	*	*	*	*	*	*	*	*	*	*	*	*	*	*	*	*	*	*	*	*	*	*	*	*	*	*	*	*	*	*	*
23	Quintana Roo	1	Cozumel	967	Estela María	865411	202947	3	3	*	*	*	*	*	*	*	*	*	*	*	*	*	*	*	*	*	*	*	*	*	*	*	*	*	*	*	*	*	*	*	*	*	*	*	*	*	*	*	*
23	Quintana Roo	1	Cozumel	968	Gabriel y Gabriela	865450	202854	6	3	*	*	*	*	*	*	*	*	*	*	*	*	*	*	*	*	*	*	*	*	*	*	*	*	*	*	*	*	*	*	*	*	*	*	*	*	*	*	*	*
23	Quintana Roo	1	Cozumel	969	Gastón Cantarell	865243	202550	10	1	*	*	*	*	*	*	*	*	*	*	*	*	*	*	*	*	*	*	*	*	*	*	*	*	*	*	*	*	*	*	*	*	*	*	*	*	*	*	*	*
23	Quintana Roo	1	Cozumel	970	El Gato	865155	202632	9	1	*	*	*	*	*	*	*	*	*	*	*	*	*	*	*	*	*	*	*	*	*	*	*	*	*	*	*	*	*	*	*	*	*	*	*	*	*	*	*	*
23	Quintana Roo	1	Cozumel	971	Isla de la Pasión	865153	203250	0	13	*	*	*	*	*	*	*	*	*	*	*	*	*	*	*	*	*	*	*	*	*	*	*	*	*	*	*	*	*	*	*	*	*	*	*	*	*	*	*	*
23	Quintana Roo	1	Cozumel	973	Luis Alcérreca	865604	203224	0	6	*	*	*	*	*	*	*	*	*	*	*	*	*	*	*	*	*	*	*	*	*	*	*	*	*	*	*	*	*	*	*	*	*	*	*	*	*	*	*	*
23	Quintana Roo	1	Cozumel	975	Las Perlitas	865414	202943	3	3	*	*	*	*	*	*	*	*	*	*	*	*	*	*	*	*	*	*	*	*	*	*	*	*	*	*	*	*	*	*	*	*	*	*	*	*	*	*	*	*
23	Quintana Roo	1	Cozumel	976	San Carlos	865316	202736	8	3	*	*	*	*	*	*	*	*	*	*	*	*	*	*	*	*	*	*	*	*	*	*	*	*	*	*	*	*	*	*	*	*	*	*	*	*	*	*	*	*
23	Quintana Roo	1	Cozumel	9998	Localidades de una vivienda				236	137	99	15	7	8	221	130	91	214	128	86	183	113	70	174	107	67	168	103	65	13	5	8	25	12	13	28	16	12	9	6	3	6	4	2	25	9	16	55	25
23	Quintana Roo	1	Cozumel	9999	Localidades de dos viviendas				69	45	24	4	1	3	65	44	21	63	42	21	59	39	20	55	36	19	48	32	16	2	2	0	4	3	1	8	6	2	4	3	1	7	4	3	3	2	1	12	13
23	Quintana Roo	2	Felipe Carrillo Puerto	0	Total del Municipio				75026	37994	37032	4875	2413	2462	69208	35110	34098	65752	33385	32367	53349	27048	26301	48226	24366	23860	43028	21747	21281	5161	2568	2593	10698	5494	5204	12362	6372	5990	5123	2682	2441	5198	2619	2579	10206	5137	5069	19054	5206
23	Quintana Roo	2	Felipe Carrillo Puerto	1	Felipe Carrillo Puerto	880243	193443	20	25744	12572	13172	1574	771	803	23346	11387	11959	22266	10864	11402	18553	8976	9577	16916	8153	8763	15230	7313	7917	1628	780	848	3165	1631	1534	3754	1908	1846	1637	823	814	1686	840	846	3707	1761	1946	7189	1455
23	Quintana Roo	2	Felipe Carrillo Puerto	6	Ignacio Manuel Altamirano	883429	191715	21	574	306	268	32	23	9	542	283	259	521	274	247	392	217	175	340	184	156	278	148	130	41	17	24	109	49	60	132	66	66	52	33	19	62	36	26	73	39	34	129	33
23	Quintana Roo	2	Felipe Carrillo Puerto	11	Betania	881717	193817	19	584	286	298	40	19	21	544	267	277	516	249	267	429	206	223	403	188	215	359	168	191	42	23	19	73	38	35	71	42	29	26	18	8	44	20	24	85	36	49	168	53
23	Quintana Roo	2	Felipe Carrillo Puerto	33	Chancah Derrepente	881347	192400	19	425	227	198	31	15	16	394	212	182	377	200	177	302	161	141	278	148	130	253	134	119	31	19	12	61	32	29	57	29	28	24	13	11	25	14	11	58	29	29	96	37
23	Quintana Roo	2	Felipe Carrillo Puerto	34	Chancah Veracruz	875940	192940	6	416	229	187	35	18	17	381	211	170	358	199	159	296	159	137	272	146	126	244	133	111	31	18	13	54	34	20	58	35	23	24	13	11	28	13	15	76	41	35	106	22
23	Quintana Roo	2	Felipe Carrillo Puerto	36	Chanchén Comandante	880629	195021	23	98	53	45	6	2	4	92	51	41	90	51	39	82	49	33	73	44	29	59	33	26	4	1	3	6	1	5	15	6	9	9	5	4	14	11	3	15	9	6	21	9
23	Quintana Roo	2	Felipe Carrillo Puerto	39	Chucab	882448	195326	24	1	*	*	*	*	*	*	*	*	*	*	*	*	*	*	*	*	*	*	*	*	*	*	*	*	*	*	*	*	*	*	*	*	*	*	*	*	*	*	*	*
23	Quintana Roo	2	Felipe Carrillo Puerto	41	Chun On	875214	200151	20	269	143	126	20	9	11	249	134	115	234	127	107	182	97	85	169	90	79	148	77	71	24	12	12	43	25	18	42	23	19	13	7	6	21	13	8	52	29	23	66	13
23	Quintana Roo	2	Felipe Carrillo Puerto	42	Chumpón	874844	200008	17	717	374	343	49	30	19	665	343	322	632	326	306	508	264	244	454	233	221	396	206	190	49	26	23	108	53	55	128	70	58	54	31	23	58	27	31	118	63	55	182	40
23	Quintana Roo	2	Felipe Carrillo Puerto	43	Chunhuás	881237	193750	20	568	286	282	36	16	20	532	270	262	514	258	256	433	220	213	397	202	195	358	186	172	30	16	14	69	34	35	87	42	45	36	18	18	39	16	23	89	43	46	158	52
23	Quintana Roo	2	Felipe Carrillo Puerto	44	Chunhuhub	883530	193505	20	4644	2391	2253	286	140	146	4358	2251	2107	4162	2143	2019	3360	1709	1651	3026	1531	1495	2699	1369	1330	306	161	145	692	381	311	822	445	377	334	178	156	327	162	165	599	310	289	1148	390
23	Quintana Roo	2	Felipe Carrillo Puerto	52	Dzoyola	882643	195633	23	461	243	218	32	21	11	429	222	207	415	218	197	337	179	158	302	162	140	266	138	128	26	11	15	66	32	34	82	41	41	35	17	18	36	24	12	64	37	27	109	40
23	Quintana Roo	2	Felipe Carrillo Puerto	53	Dzulá	882455	193614	20	1223	611	612	71	31	40	1152	580	572	1084	540	544	897	450	447	822	422	400	756	392	364	88	51	37	167	79	88	197	92	105	75	28	47	66	30	36	129	64	65	277	143
23	Quintana Roo	2	Felipe Carrillo Puerto	58	Filomeno Mata	882341	195134	30	636	324	312	39	21	18	597	303	294	566	290	276	453	232	221	411	207	204	373	192	181	43	22	21	101	49	52	116	60	56	42	25	17	38	15	23	84	42	42	169	49
23	Quintana Roo	2	Felipe Carrillo Puerto	65	Hobompich	882104	194830	30	126	73	53	8	6	2	115	65	50	107	59	48	91	51	40	84	49	35	78	45	33	11	7	4	13	7	6	17	6	11	7	2	5	6	4	2	22	11	11	22	19
23	Quintana Roo	2	Felipe Carrillo Puerto	73	Kancabchén	880917	201400	30	27	16	11	4	2	2	23	14	9	20	13	7	15	11	4	14	10	4	12	8	4	4	2	2	4	1	3	3	2	1	1	1	0	2	2	0	3	2	1	3	2
23	Quintana Roo	2	Felipe Carrillo Puerto	84	Kopchen	880908	192225	10	513	270	243	42	26	16	471	244	227	446	228	218	370	194	176	327	173	154	295	160	135	31	18	13	70	32	38	88	42	46	43	21	22	32	13	19	85	42	43	128	31
23	Quintana Roo	2	Felipe Carrillo Puerto	87	Laguna Kaná	882347	193006	11	914	485	429	40	18	22	873	467	406	828	446	382	666	359	307	602	323	279	523	285	238	60	27	33	147	81	66	158	88	70	64	36	28	79	38	41	82	54	28	191	98
23	Quintana Roo	2	Felipe Carrillo Puerto	101	Melchor Ocampo	881645	200131	31	137	75	62	6	2	4	131	73	58	121	67	54	99	54	45	90	49	41	83	45	38	10	6	4	22	13	9	22	14	8	9	5	4	7	4	3	11	7	4	27	13
23	Quintana Roo	2	Felipe Carrillo Puerto	105	Naranjal Poniente	882735	192140	20	754	385	369	62	36	26	692	349	343	652	328	324	503	262	241	437	226	211	380	198	182	56	26	30	133	61	72	166	86	80	66	36	30	57	28	29	101	53	48	173	44
23	Quintana Roo	2	Felipe Carrillo Puerto	108	Noh-Bec	881009	190835	19	2045	1031	1014	112	48	64	1930	982	948	1841	943	898	1510	761	749	1370	689	681	1217	603	614	136	68	68	284	153	131	335	171	164	140	72	68	153	86	67	240	122	118	533	188
23	Quintana Roo	2	Felipe Carrillo Puerto	110	Noh-Cah	880944	192514	10	75	40	35	6	3	3	68	36	32	65	33	32	53	27	26	50	25	25	46	24	22	5	4	1	10	5	5	10	5	5	3	2	1	4	1	3	8	4	4	19	7
23	Quintana Roo	2	Felipe Carrillo Puerto	111	La Noria	880925	201237	30	72	39	33	6	1	5	66	38	28	65	38	27	47	24	23	40	20	20	33	19	14	2	1	1	17	13	4	21	14	7	7	4	3	7	1	6	15	10	5	18	2
23	Quintana Roo	2	Felipe Carrillo Puerto	118	Petcacab	881330	191720	27	812	422	390	50	21	29	762	401	361	728	379	349	620	317	303	567	285	282	503	254	249	56	37	19	86	47	39	107	60	47	53	32	21	64	31	33	132	70	62	232	56
23	Quintana Roo	2	Felipe Carrillo Puerto	125	Polinkín	881007	191026	19	200	101	99	16	8	8	184	93	91	178	91	87	143	75	68	129	67	62	115	59	56	10	4	6	31	14	17	40	20	20	14	8	6	14	8	6	20	10	10	48	19
23	Quintana Roo	2	Felipe Carrillo Puerto	126	Polyuc	883344	193636	20	1226	623	603	70	28	42	1156	595	561	1088	556	532	865	448	417	797	414	383	715	370	345	100	54	46	191	93	98	204	94	110	68	34	34	82	44	38	148	74	74	287	103
23	Quintana Roo	2	Felipe Carrillo Puerto	131	Presidente Juárez	883342	191935	30	1004	528	476	75	36	39	926	491	435	867	466	401	678	348	330	602	306	296	515	259	256	83	39	44	165	104	61	185	112	73	76	42	34	87	47	40	124	58	66	239	82
23	Quintana Roo	2	Felipe Carrillo Puerto	137	Punta Pájaros [Faro]	872445	193601	0	3	3	0	0	0	0	3	3	0	3	3	0	3	3	0	3	3	0	3	3	0	0	0	0	0	0	0	0	0	0	0	0	0	0	0	0	0	0	0	0	0
23	Quintana Roo	2	Felipe Carrillo Puerto	139	Ramonal	883710	192400	30	417	202	215	26	11	15	391	191	200	368	183	185	300	149	151	275	140	135	247	124	123	30	12	18	61	30	31	69	30	39	25	9	16	28	16	12	46	20	26	105	40
23	Quintana Roo	2	Felipe Carrillo Puerto	149	San Andrés	880756	192410	10	347	183	164	22	13	9	325	170	155	308	160	148	245	125	120	211	107	104	187	94	93	23	14	9	57	31	26	73	36	37	34	18	16	24	13	11	41	18	23	81	25
23	Quintana Roo	2	Felipe Carrillo Puerto	169	San Felipe Berriozábal	881005	200310	30	394	201	193	37	20	17	357	181	176	340	172	168	261	133	128	225	115	110	192	97	95	24	13	11	72	35	37	87	43	44	36	18	18	33	18	15	64	33	31	93	20
23	Quintana Roo	2	Felipe Carrillo Puerto	172	San Francisco Aké	882045	195723	30	392	201	191	37	20	17	354	181	173	330	172	158	257	136	121	231	122	109	205	113	92	33	16	17	64	29	35	71	35	36	26	14	12	26	9	17	54	29	25	87	26
23	Quintana Roo	2	Felipe Carrillo Puerto	181	San José Primero	880639	194843	20	7	3	4	0	0	0	7	3	4	7	3	4	7	3	4	7	3	4	7	3	4	0	0	0	0	0	0	0	0	0	0	0	0	0	0	0	2	1	1	2	3
23	Quintana Roo	2	Felipe Carrillo Puerto	182	San José Segundo	881339	195812	30	254	128	126	17	8	9	237	120	117	228	114	114	195	102	93	177	97	80	161	86	75	15	8	7	27	10	17	38	12	26	18	5	13	16	11	5	29	15	14	56	30
23	Quintana Roo	2	Felipe Carrillo Puerto	193	San Luis	882652	193846	23	190	101	89	16	10	6	174	91	83	159	81	78	130	65	65	116	60	56	106	55	51	19	13	6	25	13	12	26	13	13	14	5	9	10	5	5	29	14	15	45	7
23	Quintana Roo	2	Felipe Carrillo Puerto	207	San Ramón	880628	200842	21	482	269	213	44	27	17	438	242	196	406	225	181	289	159	130	255	138	117	215	116	99	48	24	24	101	59	42	105	59	46	34	21	13	40	22	18	50	29	21	93	23
23	Quintana Roo	2	Felipe Carrillo Puerto	221	Santa Lucía	883832	192259	30	139	74	65	12	10	2	127	64	63	123	62	61	103	53	50	90	46	44	79	39	40	5	2	3	19	9	10	26	14	12	13	7	6	11	7	4	18	6	12	33	18
23	Quintana Roo	2	Felipe Carrillo Puerto	225	Santa María Poniente	882421	192202	20	752	375	377	47	15	32	705	360	345	668	336	332	525	259	266	465	233	232	410	201	209	55	36	19	125	65	60	134	67	67	60	26	34	55	32	23	118	55	63	196	30
23	Quintana Roo	2	Felipe Carrillo Puerto	232	Santa Rosa Segundo	881545	195840	30	1068	567	501	79	38	41	989	529	460	953	508	445	753	412	341	678	363	315	600	322	278	64	37	27	172	80	92	198	107	91	75	49	26	78	41	37	130	77	53	237	97
23	Quintana Roo	2	Felipe Carrillo Puerto	239	Señor	880804	195035	28	3095	1583	1512	202	81	121	2892	1502	1390	2738	1423	1315	2167	1122	1045	1951	1010	941	1751	901	850	229	117	112	496	263	233	553	296	257	216	112	104	200	109	91	397	209	188	749	188
23	Quintana Roo	2	Felipe Carrillo Puerto	243	Tabi	881552	194313	19	334	168	166	14	8	6	320	160	160	303	150	153	243	120	123	223	107	116	203	99	104	26	13	13	51	27	24	54	33	21	20	13	7	20	8	12	37	12	25	98	18
23	Quintana Roo	2	Felipe Carrillo Puerto	244	Tac-Chivo	880227	201316	26	180	91	89	17	8	9	163	83	80	152	78	74	109	55	54	91	49	42	76	40	36	15	8	7	39	20	19	45	22	23	18	6	12	15	9	6	25	16	9	37	3
23	Quintana Roo	2	Felipe Carrillo Puerto	248	Tepich	881520	201430	30	2753	1391	1362	201	102	99	2545	1286	1259	2401	1217	1184	1833	952	881	1627	851	776	1454	760	694	231	111	120	481	223	258	513	248	265	206	101	105	173	91	82	351	194	157	604	203
23	Quintana Roo	2	Felipe Carrillo Puerto	250	Tihosuco	882225	201145	30	4994	2552	2442	372	182	190	4617	2366	2251	4361	2248	2113	3524	1808	1716	3206	1642	1564	2885	1489	1396	384	184	200	709	374	335	784	402	382	318	166	152	321	153	168	705	360	345	1214	391
23	Quintana Roo	2	Felipe Carrillo Puerto	251	Tixcacal Guardia	881030	195131	30	659	343	316	50	29	21	609	314	295	575	297	278	478	245	233	431	218	213	373	188	185	48	21	27	83	48	35	99	56	43	47	27	20	58	30	28	96	51	45	182	34
23	Quintana Roo	2	Felipe Carrillo Puerto	254	Trapich	880819	200049	22	197	96	101	8	4	4	189	92	97	180	88	92	134	63	71	118	55	63	101	51	50	14	5	9	41	24	17	44	25	19	16	8	8	17	4	13	20	10	10	53	8
23	Quintana Roo	2	Felipe Carrillo Puerto	259	Tuzik	880935	195455	30	699	360	339	47	21	26	652	339	313	611	317	294	504	257	247	467	238	229	419	216	203	50	28	22	98	54	44	101	55	46	37	19	18	48	22	26	92	43	49	178	61
23	Quintana Roo	2	Felipe Carrillo Puerto	262	Uh May	880255	192500	10	480	243	237	29	17	12	451	226	225	433	218	215	352	182	170	323	165	158	294	151	143	31	15	16	68	29	39	80	38	42	29	17	12	29	14	15	81	42	39	127	37
23	Quintana Roo	2	Felipe Carrillo Puerto	269	Xaan	880231	195958	11	8	4	4	0	0	0	8	4	4	8	4	4	8	4	4	8	4	4	8	4	4	0	0	0	0	0	0	0	0	0	0	0	0	0	0	0	0	0	0	3	2
23	Quintana Roo	2	Felipe Carrillo Puerto	276	X-Hazil Sur	880427	192330	10	1422	729	693	80	44	36	1342	685	657	1281	654	627	1048	534	514	954	483	471	850	435	415	92	44	48	202	107	95	236	122	114	94	51	43	104	48	56	203	113	90	377	98
23	Quintana Roo	2	Felipe Carrillo Puerto	282	X-Pichil	882241	194145	22	1340	682	658	68	32	36	1272	650	622	1215	621	594	962	493	469	855	436	419	753	394	359	92	50	42	218	107	111	273	133	140	107	57	50	102	42	60	137	77	60	308	137
23	Quintana Roo	2	Felipe Carrillo Puerto	284	X-Yatil	882640	193945	27	945	472	473	53	32	21	892	440	452	838	420	418	664	341	323	599	306	293	538	287	251	84	36	48	144	63	81	158	78	80	65	35	30	61	19	42	115	61	54	229	91
23	Quintana Roo	2	Felipe Carrillo Puerto	285	Yaxché Chal	880517	200356	19	22	11	11	3	1	2	19	10	9	18	10	8	17	9	8	17	9	8	17	9	8	2	1	1	0	0	0	0	0	0	0	0	0	0	0	0	2	0	2	5	4
23	Quintana Roo	2	Felipe Carrillo Puerto	287	Yaxley	881200	194605	21	600	333	267	29	19	10	571	314	257	545	300	245	450	248	202	406	222	184	360	191	169	36	18	18	85	48	37	100	60	40	44	26	18	46	31	15	65	36	29	142	45
23	Quintana Roo	2	Felipe Carrillo Puerto	288	Yoactún	882130	192740	20	476	247	229	25	13	12	449	234	215	427	227	200	350	188	162	330	179	151	286	156	130	26	7	19	73	39	34	70	33	37	20	9	11	44	23	21	62	38	24	116	46
23	Quintana Roo	2	Felipe Carrillo Puerto	292	Yodzonot Chico	875656	200257	20	78	40	38	7	2	5	71	38	33	66	34	32	53	29	24	43	23	20	35	18	17	7	4	3	11	5	6	16	10	6	10	6	4	8	5	3	12	7	5	17	4
23	Quintana Roo	2	Felipe Carrillo Puerto	306	Andrés Quintana Roo	880610	190940	20	346	171	175	23	14	9	323	157	166	305	149	156	245	121	124	221	109	112	190	97	93	25	12	13	53	24	29	56	27	29	24	12	12	31	12	19	45	19	26	91	24
23	Quintana Roo	2	Felipe Carrillo Puerto	307	Bella Flor	883406	192325	30	4	*	*	*	*	*	*	*	*	*	*	*	*	*	*	*	*	*	*	*	*	*	*	*	*	*	*	*	*	*	*	*	*	*	*	*	*	*	*	*	*
23	Quintana Roo	2	Felipe Carrillo Puerto	308	Canzepchén	880925	200042	21	227	107	120	25	5	20	202	102	100	191	97	94	149	77	72	128	64	64	107	51	56	15	6	9	38	19	19	49	25	24	21	13	8	21	13	8	33	12	21	52	11
23	Quintana Roo	2	Felipe Carrillo Puerto	309	El Corozo	883010	191603	20	2	*	*	*	*	*	*	*	*	*	*	*	*	*	*	*	*	*	*	*	*	*	*	*	*	*	*	*	*	*	*	*	*	*	*	*	*	*	*	*	*
23	Quintana Roo	2	Felipe Carrillo Puerto	314	Chan Santa Cruz	881955	192205	24	571	297	274	33	15	18	538	282	256	528	278	250	429	223	206	390	203	187	346	179	167	23	12	11	86	47	39	98	49	49	39	20	19	44	24	20	85	42	43	152	42
23	Quintana Roo	2	Felipe Carrillo Puerto	322	Emiliano Zapata	883205	191215	27	483	254	229	39	22	17	444	232	212	426	220	206	349	184	165	319	169	150	284	146	138	26	16	10	69	32	37	78	40	38	30	15	15	35	23	12	62	32	30	110	42
23	Quintana Roo	2	Felipe Carrillo Puerto	324	Francisco I. Madero	880135	200920	10	287	137	150	25	15	10	262	122	140	245	114	131	174	88	86	144	69	75	116	57	59	25	12	13	63	22	41	70	34	36	30	19	11	28	12	16	31	14	17	63	10
23	Quintana Roo	2	Felipe Carrillo Puerto	325	Francisco May	880927	200915	30	184	93	91	16	10	6	168	83	85	163	83	80	120	68	52	103	58	45	84	48	36	8	1	7	40	14	26	42	20	22	17	10	7	19	10	9	22	16	6	37	9
23	Quintana Roo	2	Felipe Carrillo Puerto	336	Mixtequilla	881552	192310	20	82	39	43	4	1	3	78	38	40	76	38	38	71	37	34	61	33	28	53	29	24	2	0	2	5	1	4	15	5	10	10	4	6	8	4	4	9	5	4	23	7
23	Quintana Roo	2	Felipe Carrillo Puerto	339	Nueva Loría	883213	191804	30	225	120	105	12	5	7	213	115	98	199	106	93	161	85	76	142	72	70	123	63	60	17	11	6	35	19	16	46	28	18	19	13	6	19	9	10	28	17	11	56	17
23	Quintana Roo	2	Felipe Carrillo Puerto	340	Nuevo Israel	883306	191429	20	409	215	194	21	9	12	388	206	182	368	198	170	278	155	123	250	136	114	213	112	101	31	12	19	79	39	40	77	46	31	28	19	9	37	24	13	46	21	25	90	36
23	Quintana Roo	2	Felipe Carrillo Puerto	354	San Bartolo	880345	200944	22	26	17	9	2	0	2	24	17	7	23	16	7	18	11	7	14	8	6	14	8	6	1	1	0	5	5	0	7	6	1	4	3	1	0	0	0	2	2	0	3	3
23	Quintana Roo	2	Felipe Carrillo Puerto	358	San Hipólito	875956	200814	10	45	18	27	8	1	7	37	17	20	36	16	20	27	15	12	24	14	10	19	11	8	2	1	1	8	1	7	10	2	8	3	1	2	5	3	2	5	2	3	10	2
23	Quintana Roo	2	Felipe Carrillo Puerto	364	El Triunfo	872943	191525	1	3	*	*	*	*	*	*	*	*	*	*	*	*	*	*	*	*	*	*	*	*	*	*	*	*	*	*	*	*	*	*	*	*	*	*	*	*	*	*	*	*
23	Quintana Roo	2	Felipe Carrillo Puerto	368	X-Konha	880607	192550	10	107	62	45	3	1	2	104	61	43	98	58	40	84	48	36	77	44	33	66	37	29	8	4	4	12	9	3	17	12	5	7	4	3	11	7	4	12	7	5	27	10
23	Quintana Roo	2	Felipe Carrillo Puerto	381	San Antonio Nuevo	880409	193731	20	71	39	32	8	7	1	63	32	31	59	30	29	50	24	26	44	24	20	38	21	17	6	4	2	7	4	3	10	1	9	6	0	6	6	3	3	14	6	8	17	3
23	Quintana Roo	2	Felipe Carrillo Puerto	385	El Albur	880631	191403	19	4	*	*	*	*	*	*	*	*	*	*	*	*	*	*	*	*	*	*	*	*	*	*	*	*	*	*	*	*	*	*	*	*	*	*	*	*	*	*	*	*
23	Quintana Roo	2	Felipe Carrillo Puerto	392	Chan-Yodzonot	875720	200325	20	25	13	12	3	1	2	22	12	10	20	12	8	14	7	7	13	6	7	12	5	7	3	1	2	5	4	1	4	4	0	1	1	0	1	1	0	6	3	3	6	1
23	Quintana Roo	2	Felipe Carrillo Puerto	399	José María Pino Suárez	880707	194817	20	227	128	99	13	9	4	214	119	95	202	113	89	159	88	71	146	79	67	134	69	65	15	7	8	40	24	16	38	20	18	13	9	4	12	10	2	30	16	14	51	15
23	Quintana Roo	2	Felipe Carrillo Puerto	400	Kampokolché	881947	195108	30	552	274	278	33	12	21	519	262	257	484	249	235	397	213	184	346	180	166	309	160	149	46	18	28	76	31	45	107	56	51	51	33	18	37	20	17	73	36	37	139	31
23	Quintana Roo	2	Felipe Carrillo Puerto	416	Pomká	881925	194140	21	8	*	*	*	*	*	*	*	*	*	*	*	*	*	*	*	*	*	*	*	*	*	*	*	*	*	*	*	*	*	*	*	*	*	*	*	*	*	*	*	*
23	Quintana Roo	2	Felipe Carrillo Puerto	420	Reforma Agraria	880659	191151	19	314	157	157	23	13	10	291	144	147	274	133	141	210	111	99	182	96	86	169	88	81	25	15	10	56	18	38	69	27	42	28	15	13	13	8	5	41	18	23	73	17
23	Quintana Roo	2	Felipe Carrillo Puerto	421	San Vicente	883315	192505	20	4	*	*	*	*	*	*	*	*	*	*	*	*	*	*	*	*	*	*	*	*	*	*	*	*	*	*	*	*	*	*	*	*	*	*	*	*	*	*	*	*
23	Quintana Roo	2	Felipe Carrillo Puerto	432	Santa Isabel	880556	192809	10	46	27	19	2	1	1	44	26	18	43	25	18	34	19	15	31	19	12	28	16	12	2	2	0	8	5	3	9	4	5	3	0	3	3	3	0	5	3	2	9	4
23	Quintana Roo	2	Felipe Carrillo Puerto	434	Santa Lucía	880754	193625	20	1	*	*	*	*	*	*	*	*	*	*	*	*	*	*	*	*	*	*	*	*	*	*	*	*	*	*	*	*	*	*	*	*	*	*	*	*	*	*	*	*
23	Quintana Roo	2	Felipe Carrillo Puerto	445	Yodzonot Nuevo	881720	194706	21	90	45	45	10	6	4	80	39	41	69	35	34	58	31	27	55	30	25	48	26	22	13	5	8	9	3	6	7	2	5	3	1	2	7	4	3	11	5	6	17	6
23	Quintana Roo	2	Felipe Carrillo Puerto	447	Kancab Chén	875044	195237	13	10	*	*	*	*	*	*	*	*	*	*	*	*	*	*	*	*	*	*	*	*	*	*	*	*	*	*	*	*	*	*	*	*	*	*	*	*	*	*	*	*
23	Quintana Roo	2	Felipe Carrillo Puerto	454	Lagos	872920	191548	1	3	*	*	*	*	*	*	*	*	*	*	*	*	*	*	*	*	*	*	*	*	*	*	*	*	*	*	*	*	*	*	*	*	*	*	*	*	*	*	*	*
23	Quintana Roo	2	Felipe Carrillo Puerto	455	María Elena	873103	192421	1	1	*	*	*	*	*	*	*	*	*	*	*	*	*	*	*	*	*	*	*	*	*	*	*	*	*	*	*	*	*	*	*	*	*	*	*	*	*	*	*	*
23	Quintana Roo	2	Felipe Carrillo Puerto	456	Punta Herrero	872745	191915	0	61	34	27	0	0	0	13	10	3	13	10	3	13	10	3	13	10	3	13	10	3	0	0	0	0	0	0	0	0	0	0	0	0	0	0	0	0	0	0	1	1
23	Quintana Roo	2	Felipe Carrillo Puerto	468	Kopchen	881204	192347	10	2	*	*	*	*	*	*	*	*	*	*	*	*	*	*	*	*	*	*	*	*	*	*	*	*	*	*	*	*	*	*	*	*	*	*	*	*	*	*	*	*
23	Quintana Roo	2	Felipe Carrillo Puerto	494	San José Café	882444	200545	30	2	*	*	*	*	*	*	*	*	*	*	*	*	*	*	*	*	*	*	*	*	*	*	*	*	*	*	*	*	*	*	*	*	*	*	*	*	*	*	*	*
23	Quintana Roo	2	Felipe Carrillo Puerto	501	Fitosanitaria	880210	193543	20	4	*	*	*	*	*	*	*	*	*	*	*	*	*	*	*	*	*	*	*	*	*	*	*	*	*	*	*	*	*	*	*	*	*	*	*	*	*	*	*	*
23	Quintana Roo	2	Felipe Carrillo Puerto	517	La Curva	880554	191654	10	3	*	*	*	*	*	*	*	*	*	*	*	*	*	*	*	*	*	*	*	*	*	*	*	*	*	*	*	*	*	*	*	*	*	*	*	*	*	*	*	*
23	Quintana Roo	2	Felipe Carrillo Puerto	520	Chanchén	875120	195300	10	4	*	*	*	*	*	*	*	*	*	*	*	*	*	*	*	*	*	*	*	*	*	*	*	*	*	*	*	*	*	*	*	*	*	*	*	*	*	*	*	*
23	Quintana Roo	2	Felipe Carrillo Puerto	526	Chapas	880443	193521	20	1	*	*	*	*	*	*	*	*	*	*	*	*	*	*	*	*	*	*	*	*	*	*	*	*	*	*	*	*	*	*	*	*	*	*	*	*	*	*	*	*
23	Quintana Roo	2	Felipe Carrillo Puerto	532	Chun Akidz	882642	192230	14	15	8	7	0	0	0	15	8	7	15	8	7	12	6	6	12	6	6	11	5	6	0	0	0	3	2	1	1	1	0	0	0	0	1	1	0	5	2	3	4	1
23	Quintana Roo	2	Felipe Carrillo Puerto	534	Chunhuás	873734	200532	17	1	*	*	*	*	*	*	*	*	*	*	*	*	*	*	*	*	*	*	*	*	*	*	*	*	*	*	*	*	*	*	*	*	*	*	*	*	*	*	*	*
23	Quintana Roo	2	Felipe Carrillo Puerto	535	Chun-Yah	875533	200606	19	780	399	381	65	34	31	706	361	345	660	333	327	477	238	239	412	208	204	351	182	169	74	38	36	155	85	70	164	85	79	65	30	35	61	26	35	118	57	61	180	26
23	Quintana Roo	2	Felipe Carrillo Puerto	536	Chunyaxché	873655	200440	12	191	109	82	16	10	6	174	99	75	163	90	73	116	64	52	101	53	48	84	45	39	18	12	6	40	23	17	44	26	18	15	11	4	17	8	9	21	13	8	43	7
23	Quintana Roo	2	Felipe Carrillo Puerto	537	Yoactún	882058	201017	29	1	*	*	*	*	*	*	*	*	*	*	*	*	*	*	*	*	*	*	*	*	*	*	*	*	*	*	*	*	*	*	*	*	*	*	*	*	*	*	*	*
23	Quintana Roo	2	Felipe Carrillo Puerto	555	Filadelfia	881520	195830	30	4	*	*	*	*	*	*	*	*	*	*	*	*	*	*	*	*	*	*	*	*	*	*	*	*	*	*	*	*	*	*	*	*	*	*	*	*	*	*	*	*
23	Quintana Roo	2	Felipe Carrillo Puerto	558	Charys	880920	193702	20	5	*	*	*	*	*	*	*	*	*	*	*	*	*	*	*	*	*	*	*	*	*	*	*	*	*	*	*	*	*	*	*	*	*	*	*	*	*	*	*	*
23	Quintana Roo	2	Felipe Carrillo Puerto	567	El Coleguita	880454	191317	10	1	*	*	*	*	*	*	*	*	*	*	*	*	*	*	*	*	*	*	*	*	*	*	*	*	*	*	*	*	*	*	*	*	*	*	*	*	*	*	*	*
23	Quintana Roo	2	Felipe Carrillo Puerto	571	Hazil	881544	195109	29	2	*	*	*	*	*	*	*	*	*	*	*	*	*	*	*	*	*	*	*	*	*	*	*	*	*	*	*	*	*	*	*	*	*	*	*	*	*	*	*	*
23	Quintana Roo	2	Felipe Carrillo Puerto	574	Los Tres Reyes	872930	191537	1	3	*	*	*	*	*	*	*	*	*	*	*	*	*	*	*	*	*	*	*	*	*	*	*	*	*	*	*	*	*	*	*	*	*	*	*	*	*	*	*	*
23	Quintana Roo	2	Felipe Carrillo Puerto	584	Kankabdzonot	875742	200816	10	93	49	44	5	2	3	88	47	41	85	47	38	58	33	25	50	27	23	40	23	17	9	1	8	21	13	8	21	13	8	8	6	2	10	4	6	16	12	4	21	3
23	Quintana Roo	2	Felipe Carrillo Puerto	587	Cecilio Chí (Kilómetro Sesenta y Cuatro)	874013	200123	15	70	36	34	6	2	4	64	34	30	62	34	28	53	31	22	48	27	21	43	24	19	3	1	2	8	2	6	11	5	6	5	4	1	5	3	2	17	8	9	17	1
23	Quintana Roo	2	Felipe Carrillo Puerto	591	Los Lagartos	883148	191720	27	7	*	*	*	*	*	*	*	*	*	*	*	*	*	*	*	*	*	*	*	*	*	*	*	*	*	*	*	*	*	*	*	*	*	*	*	*	*	*	*	*
23	Quintana Roo	2	Felipe Carrillo Puerto	593	La Lagunita	881010	190938	19	1	*	*	*	*	*	*	*	*	*	*	*	*	*	*	*	*	*	*	*	*	*	*	*	*	*	*	*	*	*	*	*	*	*	*	*	*	*	*	*	*
23	Quintana Roo	2	Felipe Carrillo Puerto	605	Mosquiteros	873053	191409	0	3	*	*	*	*	*	*	*	*	*	*	*	*	*	*	*	*	*	*	*	*	*	*	*	*	*	*	*	*	*	*	*	*	*	*	*	*	*	*	*	*
23	Quintana Roo	2	Felipe Carrillo Puerto	607	Marín	880155	192910	10	1	*	*	*	*	*	*	*	*	*	*	*	*	*	*	*	*	*	*	*	*	*	*	*	*	*	*	*	*	*	*	*	*	*	*	*	*	*	*	*	*
23	Quintana Roo	2	Felipe Carrillo Puerto	612	Nohkancab	875933	194848	20	16	9	7	1	1	0	15	8	7	15	8	7	14	8	6	12	8	4	10	6	4	0	0	0	1	0	1	3	0	3	2	0	2	2	2	0	3	3	0	3	1
23	Quintana Roo	2	Felipe Carrillo Puerto	618	Mil Caminos	880207	193544	20	4	*	*	*	*	*	*	*	*	*	*	*	*	*	*	*	*	*	*	*	*	*	*	*	*	*	*	*	*	*	*	*	*	*	*	*	*	*	*	*	*
23	Quintana Roo	2	Felipe Carrillo Puerto	620	Pucté	880453	192812	10	13	8	5	1	1	0	12	7	5	10	6	4	10	6	4	9	5	4	7	3	4	2	1	1	0	0	0	1	1	0	1	1	0	2	2	0	3	1	2	3	0
23	Quintana Roo	2	Felipe Carrillo Puerto	630	El Ramonal	873328	194942	10	1	*	*	*	*	*	*	*	*	*	*	*	*	*	*	*	*	*	*	*	*	*	*	*	*	*	*	*	*	*	*	*	*	*	*	*	*	*	*	*	*
23	Quintana Roo	2	Felipe Carrillo Puerto	633	Tampalán	873229	190933	0	2	*	*	*	*	*	*	*	*	*	*	*	*	*	*	*	*	*	*	*	*	*	*	*	*	*	*	*	*	*	*	*	*	*	*	*	*	*	*	*	*
23	Quintana Roo	2	Felipe Carrillo Puerto	635	Rancho Chico	880725	192735	10	5	*	*	*	*	*	*	*	*	*	*	*	*	*	*	*	*	*	*	*	*	*	*	*	*	*	*	*	*	*	*	*	*	*	*	*	*	*	*	*	*
23	Quintana Roo	2	Felipe Carrillo Puerto	641	San Martín	882224	192924	17	5	*	*	*	*	*	*	*	*	*	*	*	*	*	*	*	*	*	*	*	*	*	*	*	*	*	*	*	*	*	*	*	*	*	*	*	*	*	*	*	*
23	Quintana Roo	2	Felipe Carrillo Puerto	643	Ninguno [Rastro Municipal]	880207	193540	20	4	*	*	*	*	*	*	*	*	*	*	*	*	*	*	*	*	*	*	*	*	*	*	*	*	*	*	*	*	*	*	*	*	*	*	*	*	*	*	*	*
23	Quintana Roo	2	Felipe Carrillo Puerto	648	Sahcabchén	875549	201016	10	40	21	19	2	1	1	38	20	18	36	19	17	31	16	15	27	13	14	24	12	12	3	2	1	4	2	2	7	4	3	4	3	1	3	1	2	5	2	3	10	2
23	Quintana Roo	2	Felipe Carrillo Puerto	652	San Andrés	880422	194021	10	2	*	*	*	*	*	*	*	*	*	*	*	*	*	*	*	*	*	*	*	*	*	*	*	*	*	*	*	*	*	*	*	*	*	*	*	*	*	*	*	*
23	Quintana Roo	2	Felipe Carrillo Puerto	657	San Antonio Segundo	880003	195336	20	34	19	15	0	0	0	34	19	15	33	18	15	29	15	14	28	15	13	24	11	13	1	1	0	4	3	1	3	2	1	1	0	1	4	4	0	4	1	3	8	8
23	Quintana Roo	2	Felipe Carrillo Puerto	658	San Antonio Nuevo	875814	200832	10	66	37	29	3	3	0	63	34	29	60	33	27	40	22	18	30	16	14	26	14	12	6	2	4	17	10	7	18	11	7	10	6	4	4	2	2	7	4	3	12	2
23	Quintana Roo	2	Felipe Carrillo Puerto	665	San Daniel	881927	191824	22	5	*	*	*	*	*	*	*	*	*	*	*	*	*	*	*	*	*	*	*	*	*	*	*	*	*	*	*	*	*	*	*	*	*	*	*	*	*	*	*	*
23	Quintana Roo	2	Felipe Carrillo Puerto	666	San Diego	881522	192119	20	2	*	*	*	*	*	*	*	*	*	*	*	*	*	*	*	*	*	*	*	*	*	*	*	*	*	*	*	*	*	*	*	*	*	*	*	*	*	*	*	*
23	Quintana Roo	2	Felipe Carrillo Puerto	675	San José	881828	191426	30	3	*	*	*	*	*	*	*	*	*	*	*	*	*	*	*	*	*	*	*	*	*	*	*	*	*	*	*	*	*	*	*	*	*	*	*	*	*	*	*	*
23	Quintana Roo	2	Felipe Carrillo Puerto	681	San Jorge	882353	192254	20	6	4	2	1	0	1	5	4	1	5	4	1	5	4	1	5	4	1	4	3	1	0	0	0	0	0	0	0	0	0	0	0	0	1	1	0	1	0	1	1	2
23	Quintana Roo	2	Felipe Carrillo Puerto	684	El Humilde Campesino	880355	193846	20	2	*	*	*	*	*	*	*	*	*	*	*	*	*	*	*	*	*	*	*	*	*	*	*	*	*	*	*	*	*	*	*	*	*	*	*	*	*	*	*	*
23	Quintana Roo	2	Felipe Carrillo Puerto	691	San Miguel	880524	193540	20	10	*	*	*	*	*	*	*	*	*	*	*	*	*	*	*	*	*	*	*	*	*	*	*	*	*	*	*	*	*	*	*	*	*	*	*	*	*	*	*	*
23	Quintana Roo	2	Felipe Carrillo Puerto	701	San Pedro	882435	192335	10	61	33	28	2	0	2	59	33	26	57	32	25	42	23	19	37	23	14	31	18	13	4	2	2	13	8	5	15	5	10	5	0	5	6	5	1	9	5	4	12	3
23	Quintana Roo	2	Felipe Carrillo Puerto	707	Santa Amalia	875147	194553	10	68	31	37	8	3	5	60	28	32	50	26	24	37	18	19	32	14	18	29	14	15	13	4	9	10	6	4	11	8	3	5	4	1	3	0	3	8	2	6	15	6
23	Quintana Roo	2	Felipe Carrillo Puerto	713	Santa Matilde	883804	192516	30	1	*	*	*	*	*	*	*	*	*	*	*	*	*	*	*	*	*	*	*	*	*	*	*	*	*	*	*	*	*	*	*	*	*	*	*	*	*	*	*	*
23	Quintana Roo	2	Felipe Carrillo Puerto	729	Tasistal	880547	191715	10	1	*	*	*	*	*	*	*	*	*	*	*	*	*	*	*	*	*	*	*	*	*	*	*	*	*	*	*	*	*	*	*	*	*	*	*	*	*	*	*	*
23	Quintana Roo	2	Felipe Carrillo Puerto	731	X-Huazil	880016	201320	21	4	*	*	*	*	*	*	*	*	*	*	*	*	*	*	*	*	*	*	*	*	*	*	*	*	*	*	*	*	*	*	*	*	*	*	*	*	*	*	*	*
23	Quintana Roo	2	Felipe Carrillo Puerto	738	Tres Reyes	875138	195009	20	82	45	37	5	1	4	77	44	33	73	41	32	63	35	28	53	29	24	48	26	22	5	4	1	9	5	4	17	10	7	10	6	4	5	3	2	14	9	5	17	2
23	Quintana Roo	2	Felipe Carrillo Puerto	740	Tuzik	880049	201136	17	24	12	12	2	1	1	22	11	11	20	11	9	18	10	8	16	8	8	14	7	7	2	0	2	2	1	1	3	3	0	2	2	0	2	1	1	4	1	3	6	2
23	Quintana Roo	2	Felipe Carrillo Puerto	753	Ninguno [Vivero Municipal]	880201	193548	20	4	*	*	*	*	*	*	*	*	*	*	*	*	*	*	*	*	*	*	*	*	*	*	*	*	*	*	*	*	*	*	*	*	*	*	*	*	*	*	*	*
23	Quintana Roo	2	Felipe Carrillo Puerto	768	X-Hazil Norte	875858	201252	18	161	96	65	14	9	5	147	87	60	136	78	58	99	52	47	80	42	38	70	38	32	14	12	2	34	23	11	41	23	18	19	10	9	10	4	6	23	13	10	33	3
23	Quintana Roo	2	Felipe Carrillo Puerto	835	Seis de Enero	883341	192217	30	1	*	*	*	*	*	*	*	*	*	*	*	*	*	*	*	*	*	*	*	*	*	*	*	*	*	*	*	*	*	*	*	*	*	*	*	*	*	*	*	*
23	Quintana Roo	2	Felipe Carrillo Puerto	869	Tzukum	880900	194505	18	39	24	15	5	3	2	34	21	13	32	19	13	23	14	9	20	12	8	18	11	7	3	3	0	8	4	4	10	5	5	3	2	1	2	1	1	4	3	1	6	4
23	Quintana Roo	2	Felipe Carrillo Puerto	885	Dos Cedritos	873226	195008	10	1	*	*	*	*	*	*	*	*	*	*	*	*	*	*	*	*	*	*	*	*	*	*	*	*	*	*	*	*	*	*	*	*	*	*	*	*	*	*	*	*
23	Quintana Roo	2	Felipe Carrillo Puerto	897	San Juan	881015	193704	20	1	*	*	*	*	*	*	*	*	*	*	*	*	*	*	*	*	*	*	*	*	*	*	*	*	*	*	*	*	*	*	*	*	*	*	*	*	*	*	*	*
23	Quintana Roo	2	Felipe Carrillo Puerto	899	San Lorenzo	882053	192004	20	2	*	*	*	*	*	*	*	*	*	*	*	*	*	*	*	*	*	*	*	*	*	*	*	*	*	*	*	*	*	*	*	*	*	*	*	*	*	*	*	*
23	Quintana Roo	2	Felipe Carrillo Puerto	900	San Pedro Nuevo	881448	193436	20	7	*	*	*	*	*	*	*	*	*	*	*	*	*	*	*	*	*	*	*	*	*	*	*	*	*	*	*	*	*	*	*	*	*	*	*	*	*	*	*	*
23	Quintana Roo	2	Felipe Carrillo Puerto	903	X-Café	880057	201153	20	2	*	*	*	*	*	*	*	*	*	*	*	*	*	*	*	*	*	*	*	*	*	*	*	*	*	*	*	*	*	*	*	*	*	*	*	*	*	*	*	*
23	Quintana Roo	2	Felipe Carrillo Puerto	904	Los Tres Reyes	880207	193058	20	1	*	*	*	*	*	*	*	*	*	*	*	*	*	*	*	*	*	*	*	*	*	*	*	*	*	*	*	*	*	*	*	*	*	*	*	*	*	*	*	*
23	Quintana Roo	2	Felipe Carrillo Puerto	905	Omega	883334	192305	30	1	*	*	*	*	*	*	*	*	*	*	*	*	*	*	*	*	*	*	*	*	*	*	*	*	*	*	*	*	*	*	*	*	*	*	*	*	*	*	*	*
23	Quintana Roo	2	Felipe Carrillo Puerto	906	Andrea Angélica	872921	191544	1	3	*	*	*	*	*	*	*	*	*	*	*	*	*	*	*	*	*	*	*	*	*	*	*	*	*	*	*	*	*	*	*	*	*	*	*	*	*	*	*	*
23	Quintana Roo	2	Felipe Carrillo Puerto	909	CERESO	880408	193517	20	60	*	*	*	*	*	*	*	*	*	*	*	*	*	*	*	*	*	*	*	*	*	*	*	*	*	*	*	*	*	*	*	*	*	*	*	*	*	*	*	*
23	Quintana Roo	2	Felipe Carrillo Puerto	911	Dzaptún	880430	201615	30	24	11	13	1	1	0	23	10	13	22	10	12	14	5	9	11	4	7	8	3	5	4	2	2	5	3	2	6	3	3	3	1	2	3	1	2	3	1	2	7	0
23	Quintana Roo	2	Felipe Carrillo Puerto	922	San Pedro	873302	190742	0	1	*	*	*	*	*	*	*	*	*	*	*	*	*	*	*	*	*	*	*	*	*	*	*	*	*	*	*	*	*	*	*	*	*	*	*	*	*	*	*	*
23	Quintana Roo	2	Felipe Carrillo Puerto	927	Tres Pozos	880220	193108	20	1	*	*	*	*	*	*	*	*	*	*	*	*	*	*	*	*	*	*	*	*	*	*	*	*	*	*	*	*	*	*	*	*	*	*	*	*	*	*	*	*
23	Quintana Roo	2	Felipe Carrillo Puerto	932	Ninguno	883534	192936	24	1	*	*	*	*	*	*	*	*	*	*	*	*	*	*	*	*	*	*	*	*	*	*	*	*	*	*	*	*	*	*	*	*	*	*	*	*	*	*	*	*
23	Quintana Roo	2	Felipe Carrillo Puerto	933	Ninguno	883445	192706	20	2	*	*	*	*	*	*	*	*	*	*	*	*	*	*	*	*	*	*	*	*	*	*	*	*	*	*	*	*	*	*	*	*	*	*	*	*	*	*	*	*
23	Quintana Roo	2	Felipe Carrillo Puerto	936	Rancho Víctor	880556	191632	10	4	*	*	*	*	*	*	*	*	*	*	*	*	*	*	*	*	*	*	*	*	*	*	*	*	*	*	*	*	*	*	*	*	*	*	*	*	*	*	*	*
23	Quintana Roo	2	Felipe Carrillo Puerto	940	Jorge Espinoza	873258	190838	1	3	*	*	*	*	*	*	*	*	*	*	*	*	*	*	*	*	*	*	*	*	*	*	*	*	*	*	*	*	*	*	*	*	*	*	*	*	*	*	*	*
23	Quintana Roo	2	Felipe Carrillo Puerto	942	Kopchén	880344	200413	20	4	*	*	*	*	*	*	*	*	*	*	*	*	*	*	*	*	*	*	*	*	*	*	*	*	*	*	*	*	*	*	*	*	*	*	*	*	*	*	*	*
23	Quintana Roo	2	Felipe Carrillo Puerto	944	Los Laureles	882153	194510	30	2	*	*	*	*	*	*	*	*	*	*	*	*	*	*	*	*	*	*	*	*	*	*	*	*	*	*	*	*	*	*	*	*	*	*	*	*	*	*	*	*
23	Quintana Roo	2	Felipe Carrillo Puerto	951	El Olvido (Kulché)	872928	191539	1	5	*	*	*	*	*	*	*	*	*	*	*	*	*	*	*	*	*	*	*	*	*	*	*	*	*	*	*	*	*	*	*	*	*	*	*	*	*	*	*	*
23	Quintana Roo	2	Felipe Carrillo Puerto	953	Macehual	881006	190956	19	2	*	*	*	*	*	*	*	*	*	*	*	*	*	*	*	*	*	*	*	*	*	*	*	*	*	*	*	*	*	*	*	*	*	*	*	*	*	*	*	*
23	Quintana Roo	2	Felipe Carrillo Puerto	957	El Resbalón	881932	190448	18	4	*	*	*	*	*	*	*	*	*	*	*	*	*	*	*	*	*	*	*	*	*	*	*	*	*	*	*	*	*	*	*	*	*	*	*	*	*	*	*	*
23	Quintana Roo	2	Felipe Carrillo Puerto	962	San Antonio	880449	192830	11	2	*	*	*	*	*	*	*	*	*	*	*	*	*	*	*	*	*	*	*	*	*	*	*	*	*	*	*	*	*	*	*	*	*	*	*	*	*	*	*	*
23	Quintana Roo	2	Felipe Carrillo Puerto	963	Rocío	880732	193552	20	1	*	*	*	*	*	*	*	*	*	*	*	*	*	*	*	*	*	*	*	*	*	*	*	*	*	*	*	*	*	*	*	*	*	*	*	*	*	*	*	*
23	Quintana Roo	2	Felipe Carrillo Puerto	974	Sisbic	880507	193449	20	1	*	*	*	*	*	*	*	*	*	*	*	*	*	*	*	*	*	*	*	*	*	*	*	*	*	*	*	*	*	*	*	*	*	*	*	*	*	*	*	*
23	Quintana Roo	2	Felipe Carrillo Puerto	978	X-Hazil Primero	875933	201017	10	43	20	23	4	1	3	39	19	20	36	18	18	26	11	15	18	8	10	15	8	7	5	2	3	8	6	2	12	6	6	8	3	5	3	0	3	6	4	2	9	1
23	Quintana Roo	2	Felipe Carrillo Puerto	980	Xijun Kah	880521	200433	25	6	*	*	*	*	*	*	*	*	*	*	*	*	*	*	*	*	*	*	*	*	*	*	*	*	*	*	*	*	*	*	*	*	*	*	*	*	*	*	*	*
23	Quintana Roo	2	Felipe Carrillo Puerto	986	Tihosuco	882214	201211	30	3	*	*	*	*	*	*	*	*	*	*	*	*	*	*	*	*	*	*	*	*	*	*	*	*	*	*	*	*	*	*	*	*	*	*	*	*	*	*	*	*
23	Quintana Roo	2	Felipe Carrillo Puerto	1017	Ninguno	882245	201112	30	9	*	*	*	*	*	*	*	*	*	*	*	*	*	*	*	*	*	*	*	*	*	*	*	*	*	*	*	*	*	*	*	*	*	*	*	*	*	*	*	*
23	Quintana Roo	2	Felipe Carrillo Puerto	1018	Ninguno	882240	201112	30	15	5	10	1	0	1	14	5	9	13	4	9	11	3	8	9	3	6	8	3	5	1	1	0	2	1	1	3	1	2	2	0	2	1	0	1	2	0	2	5	2
23	Quintana Roo	2	Felipe Carrillo Puerto	1019	Ninguno	882232	201112	30	3	*	*	*	*	*	*	*	*	*	*	*	*	*	*	*	*	*	*	*	*	*	*	*	*	*	*	*	*	*	*	*	*	*	*	*	*	*	*	*	*
23	Quintana Roo	2	Felipe Carrillo Puerto	1027	Chan Dzonot	882115	201131	30	8	*	*	*	*	*	*	*	*	*	*	*	*	*	*	*	*	*	*	*	*	*	*	*	*	*	*	*	*	*	*	*	*	*	*	*	*	*	*	*	*
23	Quintana Roo	2	Felipe Carrillo Puerto	1028	El Edén	880304	193400	19	1	*	*	*	*	*	*	*	*	*	*	*	*	*	*	*	*	*	*	*	*	*	*	*	*	*	*	*	*	*	*	*	*	*	*	*	*	*	*	*	*
23	Quintana Roo	2	Felipe Carrillo Puerto	1039	Pulticub	873305	190523	0	1	*	*	*	*	*	*	*	*	*	*	*	*	*	*	*	*	*	*	*	*	*	*	*	*	*	*	*	*	*	*	*	*	*	*	*	*	*	*	*	*
23	Quintana Roo	2	Felipe Carrillo Puerto	1043	Balam Nah	880403	192835	10	1	*	*	*	*	*	*	*	*	*	*	*	*	*	*	*	*	*	*	*	*	*	*	*	*	*	*	*	*	*	*	*	*	*	*	*	*	*	*	*	*
23	Quintana Roo	2	Felipe Carrillo Puerto	1044	Sahcabchén	874847	195513	10	10	6	4	1	0	1	9	6	3	9	6	3	6	4	2	5	3	2	4	3	1	1	1	0	2	1	1	2	1	1	1	1	0	1	0	1	0	0	0	2	0
23	Quintana Roo	2	Felipe Carrillo Puerto	1046	Yodzonot	875536	195956	22	9	*	*	*	*	*	*	*	*	*	*	*	*	*	*	*	*	*	*	*	*	*	*	*	*	*	*	*	*	*	*	*	*	*	*	*	*	*	*	*	*
23	Quintana Roo	2	Felipe Carrillo Puerto	1048	Las Bugambilias	880029	193548	20	1	*	*	*	*	*	*	*	*	*	*	*	*	*	*	*	*	*	*	*	*	*	*	*	*	*	*	*	*	*	*	*	*	*	*	*	*	*	*	*	*
23	Quintana Roo	2	Felipe Carrillo Puerto	1049	Los Chiquiles	872918	191554	1	3	*	*	*	*	*	*	*	*	*	*	*	*	*	*	*	*	*	*	*	*	*	*	*	*	*	*	*	*	*	*	*	*	*	*	*	*	*	*	*	*
23	Quintana Roo	2	Felipe Carrillo Puerto	1050	Ninguno [Gasolinera]	880212	193540	20	3	*	*	*	*	*	*	*	*	*	*	*	*	*	*	*	*	*	*	*	*	*	*	*	*	*	*	*	*	*	*	*	*	*	*	*	*	*	*	*	*
23	Quintana Roo	2	Felipe Carrillo Puerto	1055	Ninguno	881350	191745	26	11	*	*	*	*	*	*	*	*	*	*	*	*	*	*	*	*	*	*	*	*	*	*	*	*	*	*	*	*	*	*	*	*	*	*	*	*	*	*	*	*
23	Quintana Roo	2	Felipe Carrillo Puerto	1056	La Librada	881012	191031	19	1	*	*	*	*	*	*	*	*	*	*	*	*	*	*	*	*	*	*	*	*	*	*	*	*	*	*	*	*	*	*	*	*	*	*	*	*	*	*	*	*
23	Quintana Roo	2	Felipe Carrillo Puerto	1061	Cruz-Chen	880340	201920	30	20	11	9	1	1	0	19	10	9	19	10	9	12	6	6	10	5	5	9	5	4	0	0	0	7	4	3	6	4	2	2	1	1	1	0	1	3	2	1	4	1
23	Quintana Roo	2	Felipe Carrillo Puerto	1062	Mulichén	880316	201714	30	40	21	19	6	3	3	34	18	16	29	14	15	17	9	8	14	7	7	12	7	5	6	4	2	11	5	6	11	6	5	3	2	1	2	0	2	1	0	1	7	2
23	Quintana Roo	2	Felipe Carrillo Puerto	1065	San Salvador	880422	201942	30	46	25	21	1	1	0	45	24	21	44	24	20	33	16	17	25	13	12	19	11	8	3	2	1	9	6	3	16	8	8	8	3	5	6	2	4	4	4	0	11	2
23	Quintana Roo	2	Felipe Carrillo Puerto	1066	Villahermosa	880414	201647	30	189	88	101	25	12	13	164	76	88	154	72	82	115	53	62	99	41	58	85	37	48	13	4	9	36	19	17	38	24	14	16	12	4	14	4	10	29	11	18	51	2
23	Quintana Roo	2	Felipe Carrillo Puerto	1067	Akachén	880234	201608	20	5	*	*	*	*	*	*	*	*	*	*	*	*	*	*	*	*	*	*	*	*	*	*	*	*	*	*	*	*	*	*	*	*	*	*	*	*	*	*	*	*
23	Quintana Roo	2	Felipe Carrillo Puerto	1068	Aktún Kú	880212	201520	20	3	*	*	*	*	*	*	*	*	*	*	*	*	*	*	*	*	*	*	*	*	*	*	*	*	*	*	*	*	*	*	*	*	*	*	*	*	*	*	*	*
23	Quintana Roo	2	Felipe Carrillo Puerto	1072	José María Pino Suárez	873534	200633	10	45	23	22	1	1	0	44	22	22	43	21	22	38	20	18	33	17	16	31	15	16	1	1	0	5	1	4	8	4	4	5	3	2	2	2	0	6	2	4	11	6
23	Quintana Roo	2	Felipe Carrillo Puerto	1075	San Silverio	880211	202132	30	582	303	279	43	24	19	539	279	260	518	271	247	432	224	208	386	197	189	346	176	170	29	14	15	78	41	37	99	52	47	46	27	19	40	21	19	71	34	37	151	46
23	Quintana Roo	2	Felipe Carrillo Puerto	1078	Yalchén	880059	201833	30	472	227	245	51	27	24	415	197	218	382	179	203	292	146	146	265	136	129	236	123	113	42	21	21	81	30	51	78	29	49	27	10	17	29	13	16	80	41	39	114	21
23	Quintana Roo	2	Felipe Carrillo Puerto	1079	La Maravilla	875137	195054	20	7	*	*	*	*	*	*	*	*	*	*	*	*	*	*	*	*	*	*	*	*	*	*	*	*	*	*	*	*	*	*	*	*	*	*	*	*	*	*	*	*
23	Quintana Roo	2	Felipe Carrillo Puerto	1080	Argelia Nah	883603	193510	20	3	*	*	*	*	*	*	*	*	*	*	*	*	*	*	*	*	*	*	*	*	*	*	*	*	*	*	*	*	*	*	*	*	*	*	*	*	*	*	*	*
23	Quintana Roo	2	Felipe Carrillo Puerto	1081	Los Cocos	881925	191850	21	1	*	*	*	*	*	*	*	*	*	*	*	*	*	*	*	*	*	*	*	*	*	*	*	*	*	*	*	*	*	*	*	*	*	*	*	*	*	*	*	*
23	Quintana Roo	2	Felipe Carrillo Puerto	1082	Ninguno [Corredor Frutícola Uno]	883436	192620	20	6	4	2	0	0	0	6	4	2	6	4	2	6	4	2	6	4	2	6	4	2	0	0	0	0	0	0	0	0	0	0	0	0	0	0	0	0	0	0	1	3
23	Quintana Roo	2	Felipe Carrillo Puerto	1084	Don Urich	883603	193515	20	1	*	*	*	*	*	*	*	*	*	*	*	*	*	*	*	*	*	*	*	*	*	*	*	*	*	*	*	*	*	*	*	*	*	*	*	*	*	*	*	*
23	Quintana Roo	2	Felipe Carrillo Puerto	1085	La Esperanza	883431	192616	20	2	*	*	*	*	*	*	*	*	*	*	*	*	*	*	*	*	*	*	*	*	*	*	*	*	*	*	*	*	*	*	*	*	*	*	*	*	*	*	*	*
23	Quintana Roo	2	Felipe Carrillo Puerto	1087	Huhum K'aax	883527	192914	24	1	*	*	*	*	*	*	*	*	*	*	*	*	*	*	*	*	*	*	*	*	*	*	*	*	*	*	*	*	*	*	*	*	*	*	*	*	*	*	*	*
23	Quintana Roo	2	Felipe Carrillo Puerto	1088	Ignacio Xool	883540	193440	20	4	*	*	*	*	*	*	*	*	*	*	*	*	*	*	*	*	*	*	*	*	*	*	*	*	*	*	*	*	*	*	*	*	*	*	*	*	*	*	*	*
23	Quintana Roo	2	Felipe Carrillo Puerto	1089	Las Isabeles	880823	193632	20	6	*	*	*	*	*	*	*	*	*	*	*	*	*	*	*	*	*	*	*	*	*	*	*	*	*	*	*	*	*	*	*	*	*	*	*	*	*	*	*	*
23	Quintana Roo	2	Felipe Carrillo Puerto	1090	José Guadalupe	880313	193612	20	5	*	*	*	*	*	*	*	*	*	*	*	*	*	*	*	*	*	*	*	*	*	*	*	*	*	*	*	*	*	*	*	*	*	*	*	*	*	*	*	*
23	Quintana Roo	2	Felipe Carrillo Puerto	1091	Laguna Cenote	880304	192901	9	2	*	*	*	*	*	*	*	*	*	*	*	*	*	*	*	*	*	*	*	*	*	*	*	*	*	*	*	*	*	*	*	*	*	*	*	*	*	*	*	*
23	Quintana Roo	2	Felipe Carrillo Puerto	1096	Lucas Koyoc	883605	193514	20	4	*	*	*	*	*	*	*	*	*	*	*	*	*	*	*	*	*	*	*	*	*	*	*	*	*	*	*	*	*	*	*	*	*	*	*	*	*	*	*	*
23	Quintana Roo	2	Felipe Carrillo Puerto	1097	Manuel	883527	193434	20	5	*	*	*	*	*	*	*	*	*	*	*	*	*	*	*	*	*	*	*	*	*	*	*	*	*	*	*	*	*	*	*	*	*	*	*	*	*	*	*	*
23	Quintana Roo	2	Felipe Carrillo Puerto	1099	Norma Koyoc	883603	193514	20	3	*	*	*	*	*	*	*	*	*	*	*	*	*	*	*	*	*	*	*	*	*	*	*	*	*	*	*	*	*	*	*	*	*	*	*	*	*	*	*	*
23	Quintana Roo	2	Felipe Carrillo Puerto	1100	Novelo	880538	193541	20	1	*	*	*	*	*	*	*	*	*	*	*	*	*	*	*	*	*	*	*	*	*	*	*	*	*	*	*	*	*	*	*	*	*	*	*	*	*	*	*	*
23	Quintana Roo	2	Felipe Carrillo Puerto	1102	Olga Koyoc	883603	193511	20	2	*	*	*	*	*	*	*	*	*	*	*	*	*	*	*	*	*	*	*	*	*	*	*	*	*	*	*	*	*	*	*	*	*	*	*	*	*	*	*	*
23	Quintana Roo	2	Felipe Carrillo Puerto	1103	Las Palmas	873301	190648	0	3	*	*	*	*	*	*	*	*	*	*	*	*	*	*	*	*	*	*	*	*	*	*	*	*	*	*	*	*	*	*	*	*	*	*	*	*	*	*	*	*
23	Quintana Roo	2	Felipe Carrillo Puerto	1104	El Perico	883305	192125	30	2	*	*	*	*	*	*	*	*	*	*	*	*	*	*	*	*	*	*	*	*	*	*	*	*	*	*	*	*	*	*	*	*	*	*	*	*	*	*	*	*
23	Quintana Roo	2	Felipe Carrillo Puerto	1105	Los Ponchos	880308	192422	10	2	*	*	*	*	*	*	*	*	*	*	*	*	*	*	*	*	*	*	*	*	*	*	*	*	*	*	*	*	*	*	*	*	*	*	*	*	*	*	*	*
23	Quintana Roo	2	Felipe Carrillo Puerto	1106	El Progreso	880727	191401	19	2	*	*	*	*	*	*	*	*	*	*	*	*	*	*	*	*	*	*	*	*	*	*	*	*	*	*	*	*	*	*	*	*	*	*	*	*	*	*	*	*
23	Quintana Roo	2	Felipe Carrillo Puerto	1107	Rancho Tranquila	873301	190626	0	1	*	*	*	*	*	*	*	*	*	*	*	*	*	*	*	*	*	*	*	*	*	*	*	*	*	*	*	*	*	*	*	*	*	*	*	*	*	*	*	*
23	Quintana Roo	2	Felipe Carrillo Puerto	1108	Sac-Tzu-Tzui	880656	193605	20	4	*	*	*	*	*	*	*	*	*	*	*	*	*	*	*	*	*	*	*	*	*	*	*	*	*	*	*	*	*	*	*	*	*	*	*	*	*	*	*	*
23	Quintana Roo	2	Felipe Carrillo Puerto	1112	San José	883205	193659	20	2	*	*	*	*	*	*	*	*	*	*	*	*	*	*	*	*	*	*	*	*	*	*	*	*	*	*	*	*	*	*	*	*	*	*	*	*	*	*	*	*
23	Quintana Roo	2	Felipe Carrillo Puerto	1113	San Juan	880609	191103	19	2	*	*	*	*	*	*	*	*	*	*	*	*	*	*	*	*	*	*	*	*	*	*	*	*	*	*	*	*	*	*	*	*	*	*	*	*	*	*	*	*
23	Quintana Roo	2	Felipe Carrillo Puerto	1114	San Pedro	882404	192302	20	6	*	*	*	*	*	*	*	*	*	*	*	*	*	*	*	*	*	*	*	*	*	*	*	*	*	*	*	*	*	*	*	*	*	*	*	*	*	*	*	*
23	Quintana Roo	2	Felipe Carrillo Puerto	1115	San Valentín	881628	192047	30	6	*	*	*	*	*	*	*	*	*	*	*	*	*	*	*	*	*	*	*	*	*	*	*	*	*	*	*	*	*	*	*	*	*	*	*	*	*	*	*	*
23	Quintana Roo	2	Felipe Carrillo Puerto	1119	El Trailero	883527	193431	20	3	*	*	*	*	*	*	*	*	*	*	*	*	*	*	*	*	*	*	*	*	*	*	*	*	*	*	*	*	*	*	*	*	*	*	*	*	*	*	*	*
23	Quintana Roo	2	Felipe Carrillo Puerto	1120	Tricasa	880501	193534	20	1	*	*	*	*	*	*	*	*	*	*	*	*	*	*	*	*	*	*	*	*	*	*	*	*	*	*	*	*	*	*	*	*	*	*	*	*	*	*	*	*
23	Quintana Roo	2	Felipe Carrillo Puerto	1122	Yolanda Díaz	883603	193512	20	4	*	*	*	*	*	*	*	*	*	*	*	*	*	*	*	*	*	*	*	*	*	*	*	*	*	*	*	*	*	*	*	*	*	*	*	*	*	*	*	*
23	Quintana Roo	2	Felipe Carrillo Puerto	9998	Localidades de una vivienda				366	253	113	8	4	4	333	236	97	323	232	91	301	217	84	288	206	82	275	201	74	12	5	7	20	14	6	29	21	8	13	11	2	13	5	8	55	38	17	53	59
23	Quintana Roo	2	Felipe Carrillo Puerto	9999	Localidades de dos viviendas				40	25	15	3	2	1	37	23	14	34	22	12	31	21	10	28	19	9	25	16	9	4	1	3	2	1	1	5	3	2	3	2	1	3	3	0	3	2	1	5	8
23	Quintana Roo	3	Isla Mujeres	0	Total del Municipio				16203	8358	7845	946	492	454	15157	7812	7345	14425	7440	6985	12214	6311	5903	11398	5903	5495	10531	5483	5048	1064	556	508	1879	945	934	2067	1042	1025	816	408	408	867	420	447	2177	1090	1087	4548	907
23	Quintana Roo	3	Isla Mujeres	1	Isla Mujeres	864354	211356	1	12642	6419	6223	688	352	336	11881	6028	5853	11343	5760	5583	9712	4936	4776	9091	4629	4462	8403	4293	4110	784	409	375	1385	683	702	1546	769	777	621	307	314	688	336	352	1725	851	874	3658	740
23	Quintana Roo	3	Isla Mujeres	54	Chacmuchuch	865205	211650	10	4	*	*	*	*	*	*	*	*	*	*	*	*	*	*	*	*	*	*	*	*	*	*	*	*	*	*	*	*	*	*	*	*	*	*	*	*	*	*	*	*
23	Quintana Roo	3	Isla Mujeres	76	Sueño Guajiro	865247	211634	10	1	*	*	*	*	*	*	*	*	*	*	*	*	*	*	*	*	*	*	*	*	*	*	*	*	*	*	*	*	*	*	*	*	*	*	*	*	*	*	*	*
23	Quintana Roo	3	Isla Mujeres	77	Sufre y Calla	865138	211425	10	14	7	7	3	2	1	11	5	6	10	5	5	10	5	5	9	4	5	8	4	4	1	0	1	0	0	0	1	1	0	1	1	0	1	0	1	5	2	3	5	0
23	Quintana Roo	3	Isla Mujeres	78	El Cerrito	865136	211408	10	4	*	*	*	*	*	*	*	*	*	*	*	*	*	*	*	*	*	*	*	*	*	*	*	*	*	*	*	*	*	*	*	*	*	*	*	*	*	*	*	*
23	Quintana Roo	3	Isla Mujeres	89	La Noria	865130	211354	10	13	7	6	1	1	0	12	6	6	12	6	6	9	4	5	8	4	4	7	3	4	0	0	0	3	2	1	4	2	2	1	0	1	1	1	0	2	0	2	3	0
23	Quintana Roo	3	Isla Mujeres	91	La Proa	864809	211332	2	6	*	*	*	*	*	*	*	*	*	*	*	*	*	*	*	*	*	*	*	*	*	*	*	*	*	*	*	*	*	*	*	*	*	*	*	*	*	*	*	*
23	Quintana Roo	3	Isla Mujeres	92	Punta Sam	864809	211402	7	81	43	38	3	1	2	78	42	36	75	42	33	73	41	32	69	40	29	67	39	28	4	1	3	1	0	1	5	1	4	4	1	3	2	1	1	7	4	3	22	10
23	Quintana Roo	3	Isla Mujeres	93	Rancho Viejo	865447	211523	10	8	5	3	1	1	0	7	4	3	7	4	3	7	4	3	7	4	3	7	4	3	0	0	0	0	0	0	0	0	0	0	0	0	0	0	0	2	1	1	1	4
23	Quintana Roo	3	Isla Mujeres	95	El Meco	864813	211244	4	14	11	3	1	0	1	13	11	2	13	11	2	11	9	2	11	9	2	11	9	2	0	0	0	2	2	0	2	2	0	0	0	0	0	0	0	2	2	0	2	0
23	Quintana Roo	3	Isla Mujeres	103	Isla Blanca	864839	212437	1	2	*	*	*	*	*	*	*	*	*	*	*	*	*	*	*	*	*	*	*	*	*	*	*	*	*	*	*	*	*	*	*	*	*	*	*	*	*	*	*	*
23	Quintana Roo	3	Isla Mujeres	115	Cabo Catoche	870616	213610	1	5	4	1	0	0	0	5	4	1	5	4	1	5	4	1	5	4	1	5	4	1	0	0	0	0	0	0	0	0	0	0	0	0	0	0	0	0	0	0	0	0
23	Quintana Roo	3	Isla Mujeres	118	Boca Iglesia	865821	213209	1	57	50	7	1	1	0	56	49	7	55	48	7	50	44	6	50	44	6	50	44	6	2	2	0	4	3	1	3	3	0	0	0	0	0	0	0	5	4	1	5	6
23	Quintana Roo	3	Isla Mujeres	122	Boca Nueva	870045	213426	1	10	*	*	*	*	*	*	*	*	*	*	*	*	*	*	*	*	*	*	*	*	*	*	*	*	*	*	*	*	*	*	*	*	*	*	*	*	*	*	*	*
23	Quintana Roo	3	Isla Mujeres	128	Francisco Javier	864746	211952	0	1	*	*	*	*	*	*	*	*	*	*	*	*	*	*	*	*	*	*	*	*	*	*	*	*	*	*	*	*	*	*	*	*	*	*	*	*	*	*	*	*
23	Quintana Roo	3	Isla Mujeres	156	Santa Fe	865133	211416	10	3	*	*	*	*	*	*	*	*	*	*	*	*	*	*	*	*	*	*	*	*	*	*	*	*	*	*	*	*	*	*	*	*	*	*	*	*	*	*	*	*
23	Quintana Roo	3	Isla Mujeres	157	El Paraíso	865133	211410	10	5	*	*	*	*	*	*	*	*	*	*	*	*	*	*	*	*	*	*	*	*	*	*	*	*	*	*	*	*	*	*	*	*	*	*	*	*	*	*	*	*
23	Quintana Roo	3	Isla Mujeres	158	El Gato	865137	211413	10	4	*	*	*	*	*	*	*	*	*	*	*	*	*	*	*	*	*	*	*	*	*	*	*	*	*	*	*	*	*	*	*	*	*	*	*	*	*	*	*	*
23	Quintana Roo	3	Isla Mujeres	164	Ebén Ezer	865301	211434	10	2	*	*	*	*	*	*	*	*	*	*	*	*	*	*	*	*	*	*	*	*	*	*	*	*	*	*	*	*	*	*	*	*	*	*	*	*	*	*	*	*
23	Quintana Roo	3	Isla Mujeres	172	El Abuelo	865230	211427	10	2	*	*	*	*	*	*	*	*	*	*	*	*	*	*	*	*	*	*	*	*	*	*	*	*	*	*	*	*	*	*	*	*	*	*	*	*	*	*	*	*
23	Quintana Roo	3	Isla Mujeres	173	La Estrella	865227	211425	10	2	*	*	*	*	*	*	*	*	*	*	*	*	*	*	*	*	*	*	*	*	*	*	*	*	*	*	*	*	*	*	*	*	*	*	*	*	*	*	*	*
23	Quintana Roo	3	Isla Mujeres	177	La Morena	865203	211418	10	10	8	2	1	0	1	9	8	1	8	7	1	6	5	1	6	5	1	6	5	1	1	1	0	2	2	0	1	1	0	0	0	0	0	0	0	0	0	0	1	0
23	Quintana Roo	3	Isla Mujeres	190	Villas Punta Sam	864809	211325	2	6	*	*	*	*	*	*	*	*	*	*	*	*	*	*	*	*	*	*	*	*	*	*	*	*	*	*	*	*	*	*	*	*	*	*	*	*	*	*	*	*
23	Quintana Roo	3	Isla Mujeres	193	Playa Azul	864807	211259	1	13	8	5	0	0	0	13	8	5	12	7	5	12	7	5	12	7	5	10	6	4	1	1	0	0	0	0	0	0	0	0	0	0	2	1	1	2	2	0	3	2
23	Quintana Roo	3	Isla Mujeres	249	Casa Blanca	864744	211957	0	2	*	*	*	*	*	*	*	*	*	*	*	*	*	*	*	*	*	*	*	*	*	*	*	*	*	*	*	*	*	*	*	*	*	*	*	*	*	*	*	*
23	Quintana Roo	3	Isla Mujeres	258	Bonsai	865058	211351	10	1	*	*	*	*	*	*	*	*	*	*	*	*	*	*	*	*	*	*	*	*	*	*	*	*	*	*	*	*	*	*	*	*	*	*	*	*	*	*	*	*
23	Quintana Roo	3	Isla Mujeres	260	El Corzo	865134	211502	10	1	*	*	*	*	*	*	*	*	*	*	*	*	*	*	*	*	*	*	*	*	*	*	*	*	*	*	*	*	*	*	*	*	*	*	*	*	*	*	*	*
23	Quintana Roo	3	Isla Mujeres	265	Fernando Zapata	865308	211437	10	3	*	*	*	*	*	*	*	*	*	*	*	*	*	*	*	*	*	*	*	*	*	*	*	*	*	*	*	*	*	*	*	*	*	*	*	*	*	*	*	*
23	Quintana Roo	3	Isla Mujeres	269	Las Gaviotas	865214	211418	10	1	*	*	*	*	*	*	*	*	*	*	*	*	*	*	*	*	*	*	*	*	*	*	*	*	*	*	*	*	*	*	*	*	*	*	*	*	*	*	*	*
23	Quintana Roo	3	Isla Mujeres	274	Nicte-Ha	865237	211426	10	6	*	*	*	*	*	*	*	*	*	*	*	*	*	*	*	*	*	*	*	*	*	*	*	*	*	*	*	*	*	*	*	*	*	*	*	*	*	*	*	*
23	Quintana Roo	3	Isla Mujeres	286	Zona Urbana Ejido Isla Mujeres	865113	211329	10	2653	1386	1267	224	121	103	2405	1251	1154	2255	1169	1086	1776	926	850	1620	842	778	1496	786	710	223	117	106	406	208	198	419	212	207	156	84	72	124	56	68	341	176	165	694	75
23	Quintana Roo	3	Isla Mujeres	289	Luis Barocio de la Lama	864809	211313	3	9	5	4	0	0	0	9	5	4	9	5	4	9	5	4	8	4	4	8	4	4	0	0	0	0	0	0	1	1	0	1	1	0	0	0	0	2	0	2	4	1
23	Quintana Roo	3	Isla Mujeres	290	Ninguno	864808	211323	2	7	*	*	*	*	*	*	*	*	*	*	*	*	*	*	*	*	*	*	*	*	*	*	*	*	*	*	*	*	*	*	*	*	*	*	*	*	*	*	*	*
23	Quintana Roo	3	Isla Mujeres	299	Cayo Sucio	865236	212523	1	19	16	3	1	0	1	18	16	2	18	16	2	18	16	2	16	14	2	15	14	1	0	0	0	0	0	0	2	2	0	2	2	0	1	0	1	1	1	0	1	0
23	Quintana Roo	3	Isla Mujeres	307	Santa Fátima	864844	211822	1	1	*	*	*	*	*	*	*	*	*	*	*	*	*	*	*	*	*	*	*	*	*	*	*	*	*	*	*	*	*	*	*	*	*	*	*	*	*	*	*	*
23	Quintana Roo	3	Isla Mujeres	313	San Valentín	865234	211427	10	1	*	*	*	*	*	*	*	*	*	*	*	*	*	*	*	*	*	*	*	*	*	*	*	*	*	*	*	*	*	*	*	*	*	*	*	*	*	*	*	*
23	Quintana Roo	3	Isla Mujeres	314	Santa Lucía (El Tigre)	865312	211421	10	3	*	*	*	*	*	*	*	*	*	*	*	*	*	*	*	*	*	*	*	*	*	*	*	*	*	*	*	*	*	*	*	*	*	*	*	*	*	*	*	*
23	Quintana Roo	3	Isla Mujeres	315	Santa Odila	865134	211449	10	6	*	*	*	*	*	*	*	*	*	*	*	*	*	*	*	*	*	*	*	*	*	*	*	*	*	*	*	*	*	*	*	*	*	*	*	*	*	*	*	*
23	Quintana Roo	3	Isla Mujeres	318	Refugio del Pirata Morgan	864842	211827	1	1	*	*	*	*	*	*	*	*	*	*	*	*	*	*	*	*	*	*	*	*	*	*	*	*	*	*	*	*	*	*	*	*	*	*	*	*	*	*	*	*
23	Quintana Roo	3	Isla Mujeres	320	Villas Mar	864809	211321	3	7	2	5	0	0	0	7	2	5	7	2	5	7	2	5	7	2	5	7	2	5	0	0	0	0	0	0	0	0	0	0	0	0	0	0	0	1	0	1	4	1
23	Quintana Roo	3	Isla Mujeres	323	El Manglar	865026	211321	10	1	*	*	*	*	*	*	*	*	*	*	*	*	*	*	*	*	*	*	*	*	*	*	*	*	*	*	*	*	*	*	*	*	*	*	*	*	*	*	*	*
23	Quintana Roo	3	Isla Mujeres	328	El Azabache	870515	211431	10	4	*	*	*	*	*	*	*	*	*	*	*	*	*	*	*	*	*	*	*	*	*	*	*	*	*	*	*	*	*	*	*	*	*	*	*	*	*	*	*	*
23	Quintana Roo	3	Isla Mujeres	329	Berny y Caridad	870516	211339	10	1	*	*	*	*	*	*	*	*	*	*	*	*	*	*	*	*	*	*	*	*	*	*	*	*	*	*	*	*	*	*	*	*	*	*	*	*	*	*	*	*
23	Quintana Roo	3	Isla Mujeres	330	El Campet	864831	211845	1	1	*	*	*	*	*	*	*	*	*	*	*	*	*	*	*	*	*	*	*	*	*	*	*	*	*	*	*	*	*	*	*	*	*	*	*	*	*	*	*	*
23	Quintana Roo	3	Isla Mujeres	334	Casa Tangara	864807	211315	1	11	*	*	*	*	*	*	*	*	*	*	*	*	*	*	*	*	*	*	*	*	*	*	*	*	*	*	*	*	*	*	*	*	*	*	*	*	*	*	*	*
23	Quintana Roo	3	Isla Mujeres	337	Costa Mujeres	864809	211316	3	6	5	1	0	0	0	6	5	1	6	5	1	6	5	1	6	5	1	6	5	1	0	0	0	0	0	0	0	0	0	0	0	0	0	0	0	0	0	0	0	2
23	Quintana Roo	3	Isla Mujeres	339	Chalet Maya	864835	211843	1	2	*	*	*	*	*	*	*	*	*	*	*	*	*	*	*	*	*	*	*	*	*	*	*	*	*	*	*	*	*	*	*	*	*	*	*	*	*	*	*	*
23	Quintana Roo	3	Isla Mujeres	341	San Antonio	870516	211332	10	4	*	*	*	*	*	*	*	*	*	*	*	*	*	*	*	*	*	*	*	*	*	*	*	*	*	*	*	*	*	*	*	*	*	*	*	*	*	*	*	*
23	Quintana Roo	3	Isla Mujeres	345	La Esperanza	870516	211314	10	3	*	*	*	*	*	*	*	*	*	*	*	*	*	*	*	*	*	*	*	*	*	*	*	*	*	*	*	*	*	*	*	*	*	*	*	*	*	*	*	*
23	Quintana Roo	3	Isla Mujeres	347	La Trinidad	870516	211344	10	6	*	*	*	*	*	*	*	*	*	*	*	*	*	*	*	*	*	*	*	*	*	*	*	*	*	*	*	*	*	*	*	*	*	*	*	*	*	*	*	*
23	Quintana Roo	3	Isla Mujeres	351	El Divino Maestro	865457	211541	10	1	*	*	*	*	*	*	*	*	*	*	*	*	*	*	*	*	*	*	*	*	*	*	*	*	*	*	*	*	*	*	*	*	*	*	*	*	*	*	*	*
23	Quintana Roo	3	Isla Mujeres	352	Francisco May	870515	211648	10	223	120	103	10	5	5	213	115	98	198	107	91	153	79	74	142	76	66	123	67	56	20	12	8	40	24	16	40	21	19	11	3	8	19	9	10	31	17	14	53	15
23	Quintana Roo	3	Isla Mujeres	353	Fundación Renacimiento	864812	211259	6	1	*	*	*	*	*	*	*	*	*	*	*	*	*	*	*	*	*	*	*	*	*	*	*	*	*	*	*	*	*	*	*	*	*	*	*	*	*	*	*	*
23	Quintana Roo	3	Isla Mujeres	356	Héctor Da Silva	864754	211937	0	2	*	*	*	*	*	*	*	*	*	*	*	*	*	*	*	*	*	*	*	*	*	*	*	*	*	*	*	*	*	*	*	*	*	*	*	*	*	*	*	*
23	Quintana Roo	3	Isla Mujeres	363	Ninguno	865318	211445	10	2	*	*	*	*	*	*	*	*	*	*	*	*	*	*	*	*	*	*	*	*	*	*	*	*	*	*	*	*	*	*	*	*	*	*	*	*	*	*	*	*
23	Quintana Roo	3	Isla Mujeres	372	Jesús Alberto López Camino	864812	211309	7	11	6	5	1	1	0	10	5	5	10	5	5	10	5	5	10	5	5	9	5	4	0	0	0	0	0	0	0	0	0	0	0	0	1	0	1	5	3	2	5	0
23	Quintana Roo	3	Isla Mujeres	377	José María	870300	211420	10	3	*	*	*	*	*	*	*	*	*	*	*	*	*	*	*	*	*	*	*	*	*	*	*	*	*	*	*	*	*	*	*	*	*	*	*	*	*	*	*	*
23	Quintana Roo	3	Isla Mujeres	378	Juan Carlos Rojas Chan	865126	211355	10	2	*	*	*	*	*	*	*	*	*	*	*	*	*	*	*	*	*	*	*	*	*	*	*	*	*	*	*	*	*	*	*	*	*	*	*	*	*	*	*	*
23	Quintana Roo	3	Isla Mujeres	381	Marina Isla Blanca	864750	211943	0	1	*	*	*	*	*	*	*	*	*	*	*	*	*	*	*	*	*	*	*	*	*	*	*	*	*	*	*	*	*	*	*	*	*	*	*	*	*	*	*	*
23	Quintana Roo	3	Isla Mujeres	384	San Juan de los Reyes	870516	212017	11	2	*	*	*	*	*	*	*	*	*	*	*	*	*	*	*	*	*	*	*	*	*	*	*	*	*	*	*	*	*	*	*	*	*	*	*	*	*	*	*	*
23	Quintana Roo	3	Isla Mujeres	386	El Palomo	870517	211244	10	7	*	*	*	*	*	*	*	*	*	*	*	*	*	*	*	*	*	*	*	*	*	*	*	*	*	*	*	*	*	*	*	*	*	*	*	*	*	*	*	*
23	Quintana Roo	3	Isla Mujeres	387	Paradise Beach Club	864809	211327	2	2	*	*	*	*	*	*	*	*	*	*	*	*	*	*	*	*	*	*	*	*	*	*	*	*	*	*	*	*	*	*	*	*	*	*	*	*	*	*	*	*
23	Quintana Roo	3	Isla Mujeres	388	Pedregal del Río Manatí	865039	211336	10	3	*	*	*	*	*	*	*	*	*	*	*	*	*	*	*	*	*	*	*	*	*	*	*	*	*	*	*	*	*	*	*	*	*	*	*	*	*	*	*	*
23	Quintana Roo	3	Isla Mujeres	391	Punta Cocos	864916	211842	1	1	*	*	*	*	*	*	*	*	*	*	*	*	*	*	*	*	*	*	*	*	*	*	*	*	*	*	*	*	*	*	*	*	*	*	*	*	*	*	*	*
23	Quintana Roo	3	Isla Mujeres	392	El Sauce y la Palma	865554	211704	10	1	*	*	*	*	*	*	*	*	*	*	*	*	*	*	*	*	*	*	*	*	*	*	*	*	*	*	*	*	*	*	*	*	*	*	*	*	*	*	*	*
23	Quintana Roo	3	Isla Mujeres	395	Residencial Arrecifes	864813	211318	9	20	9	11	0	0	0	20	9	11	19	8	11	14	5	9	12	4	8	11	4	7	1	1	0	5	3	2	6	4	2	2	1	1	1	0	1	3	1	2	8	1
23	Quintana Roo	3	Isla Mujeres	398	El Sacrificio	870516	211335	10	8	*	*	*	*	*	*	*	*	*	*	*	*	*	*	*	*	*	*	*	*	*	*	*	*	*	*	*	*	*	*	*	*	*	*	*	*	*	*	*	*
23	Quintana Roo	3	Isla Mujeres	399	El Oriental	870517	211250	10	3	*	*	*	*	*	*	*	*	*	*	*	*	*	*	*	*	*	*	*	*	*	*	*	*	*	*	*	*	*	*	*	*	*	*	*	*	*	*	*	*
23	Quintana Roo	3	Isla Mujeres	406	Santa Rosario	870522	211343	10	4	*	*	*	*	*	*	*	*	*	*	*	*	*	*	*	*	*	*	*	*	*	*	*	*	*	*	*	*	*	*	*	*	*	*	*	*	*	*	*	*
23	Quintana Roo	3	Isla Mujeres	408	San Pedro Sarahí	865543	211716	10	1	*	*	*	*	*	*	*	*	*	*	*	*	*	*	*	*	*	*	*	*	*	*	*	*	*	*	*	*	*	*	*	*	*	*	*	*	*	*	*	*
23	Quintana Roo	3	Isla Mujeres	409	El Silbido	870042	211342	10	1	*	*	*	*	*	*	*	*	*	*	*	*	*	*	*	*	*	*	*	*	*	*	*	*	*	*	*	*	*	*	*	*	*	*	*	*	*	*	*	*
23	Quintana Roo	3	Isla Mujeres	412	Uchben Kah	870522	211402	10	3	*	*	*	*	*	*	*	*	*	*	*	*	*	*	*	*	*	*	*	*	*	*	*	*	*	*	*	*	*	*	*	*	*	*	*	*	*	*	*	*
23	Quintana Roo	3	Isla Mujeres	414	Villa Erfica	864809	211329	2	3	*	*	*	*	*	*	*	*	*	*	*	*	*	*	*	*	*	*	*	*	*	*	*	*	*	*	*	*	*	*	*	*	*	*	*	*	*	*	*	*
23	Quintana Roo	3	Isla Mujeres	415	Villa Fragata	864802	211931	1	2	*	*	*	*	*	*	*	*	*	*	*	*	*	*	*	*	*	*	*	*	*	*	*	*	*	*	*	*	*	*	*	*	*	*	*	*	*	*	*	*
23	Quintana Roo	3	Isla Mujeres	416	Villa Nifers	864808	211919	1	3	3	0	0	0	0	3	3	0	3	3	0	3	3	0	3	3	0	3	3	0	0	0	0	0	0	0	0	0	0	0	0	0	0	0	0	0	0	0	0	1
23	Quintana Roo	3	Isla Mujeres	418	Banco de León	865140	211512	10	3	*	*	*	*	*	*	*	*	*	*	*	*	*	*	*	*	*	*	*	*	*	*	*	*	*	*	*	*	*	*	*	*	*	*	*	*	*	*	*	*
23	Quintana Roo	3	Isla Mujeres	421	Escénica	864809	211334	2	19	11	8	0	0	0	19	11	8	18	10	8	16	8	8	16	8	8	16	8	8	1	1	0	2	2	0	2	2	0	0	0	0	0	0	0	3	1	2	4	6
23	Quintana Roo	3	Isla Mujeres	428	Tomás Rosales	865559	211728	10	2	*	*	*	*	*	*	*	*	*	*	*	*	*	*	*	*	*	*	*	*	*	*	*	*	*	*	*	*	*	*	*	*	*	*	*	*	*	*	*	*
23	Quintana Roo	3	Isla Mujeres	429	Santa Rosa	865120	211601	1	1	*	*	*	*	*	*	*	*	*	*	*	*	*	*	*	*	*	*	*	*	*	*	*	*	*	*	*	*	*	*	*	*	*	*	*	*	*	*	*	*
23	Quintana Roo	3	Isla Mujeres	433	Chico Cenote	864954	211320	10	36	22	14	3	1	2	33	21	12	32	20	12	29	17	12	24	15	9	23	14	9	1	1	0	3	3	0	8	5	3	5	2	3	1	1	0	2	2	0	5	7
23	Quintana Roo	3	Isla Mujeres	435	El Dorado	864740	212005	0	1	*	*	*	*	*	*	*	*	*	*	*	*	*	*	*	*	*	*	*	*	*	*	*	*	*	*	*	*	*	*	*	*	*	*	*	*	*	*	*	*
23	Quintana Roo	3	Isla Mujeres	436	La Bendición de Dios	865548	211651	10	1	*	*	*	*	*	*	*	*	*	*	*	*	*	*	*	*	*	*	*	*	*	*	*	*	*	*	*	*	*	*	*	*	*	*	*	*	*	*	*	*
23	Quintana Roo	3	Isla Mujeres	438	Dos Arbolitos	865408	211501	10	1	*	*	*	*	*	*	*	*	*	*	*	*	*	*	*	*	*	*	*	*	*	*	*	*	*	*	*	*	*	*	*	*	*	*	*	*	*	*	*	*
23	Quintana Roo	3	Isla Mujeres	440	San Fernando de los Núñez	865540	211709	10	2	*	*	*	*	*	*	*	*	*	*	*	*	*	*	*	*	*	*	*	*	*	*	*	*	*	*	*	*	*	*	*	*	*	*	*	*	*	*	*	*
23	Quintana Roo	3	Isla Mujeres	441	Mira Playa	864818	211330	9	15	5	10	0	0	0	15	5	10	15	5	10	14	5	9	14	5	9	14	5	9	0	0	0	1	0	1	1	0	1	0	0	0	0	0	0	2	0	2	7	2
23	Quintana Roo	3	Isla Mujeres	443	José Canché	865338	211449	10	5	*	*	*	*	*	*	*	*	*	*	*	*	*	*	*	*	*	*	*	*	*	*	*	*	*	*	*	*	*	*	*	*	*	*	*	*	*	*	*	*
23	Quintana Roo	3	Isla Mujeres	444	Los Mariachis Dos	870521	211410	10	7	*	*	*	*	*	*	*	*	*	*	*	*	*	*	*	*	*	*	*	*	*	*	*	*	*	*	*	*	*	*	*	*	*	*	*	*	*	*	*	*
23	Quintana Roo	3	Isla Mujeres	445	Los Mariachis	870521	211412	10	3	*	*	*	*	*	*	*	*	*	*	*	*	*	*	*	*	*	*	*	*	*	*	*	*	*	*	*	*	*	*	*	*	*	*	*	*	*	*	*	*
23	Quintana Roo	3	Isla Mujeres	446	Los Potrillos	870516	211407	10	4	*	*	*	*	*	*	*	*	*	*	*	*	*	*	*	*	*	*	*	*	*	*	*	*	*	*	*	*	*	*	*	*	*	*	*	*	*	*	*	*
23	Quintana Roo	3	Isla Mujeres	448	Tres de Septiembre	865215	211348	10	39	18	21	1	1	0	38	17	21	35	16	19	30	14	16	24	12	12	23	12	11	4	1	3	4	2	2	7	3	4	6	2	4	1	0	1	4	1	3	10	2
23	Quintana Roo	3	Isla Mujeres	449	Jabalí	865249	211327	10	2	*	*	*	*	*	*	*	*	*	*	*	*	*	*	*	*	*	*	*	*	*	*	*	*	*	*	*	*	*	*	*	*	*	*	*	*	*	*	*	*
23	Quintana Roo	3	Isla Mujeres	450	Isla Mujeres Bella	865145	211351	10	3	*	*	*	*	*	*	*	*	*	*	*	*	*	*	*	*	*	*	*	*	*	*	*	*	*	*	*	*	*	*	*	*	*	*	*	*	*	*	*	*
23	Quintana Roo	3	Isla Mujeres	451	La Bellota	870539	211336	10	2	*	*	*	*	*	*	*	*	*	*	*	*	*	*	*	*	*	*	*	*	*	*	*	*	*	*	*	*	*	*	*	*	*	*	*	*	*	*	*	*
23	Quintana Roo	3	Isla Mujeres	454	Cayo Cahum	865919	213336	0	6	*	*	*	*	*	*	*	*	*	*	*	*	*	*	*	*	*	*	*	*	*	*	*	*	*	*	*	*	*	*	*	*	*	*	*	*	*	*	*	*
23	Quintana Roo	3	Isla Mujeres	456	Daniel de los Cobos	870518	211350	10	1	*	*	*	*	*	*	*	*	*	*	*	*	*	*	*	*	*	*	*	*	*	*	*	*	*	*	*	*	*	*	*	*	*	*	*	*	*	*	*	*
23	Quintana Roo	3	Isla Mujeres	462	Los Pinos	870517	211527	10	2	*	*	*	*	*	*	*	*	*	*	*	*	*	*	*	*	*	*	*	*	*	*	*	*	*	*	*	*	*	*	*	*	*	*	*	*	*	*	*	*
23	Quintana Roo	3	Isla Mujeres	463	Punta Taus Dos	864912	211656	1	2	*	*	*	*	*	*	*	*	*	*	*	*	*	*	*	*	*	*	*	*	*	*	*	*	*	*	*	*	*	*	*	*	*	*	*	*	*	*	*	*
23	Quintana Roo	3	Isla Mujeres	465	Rancho Oasis de Paz	870515	211741	10	5	*	*	*	*	*	*	*	*	*	*	*	*	*	*	*	*	*	*	*	*	*	*	*	*	*	*	*	*	*	*	*	*	*	*	*	*	*	*	*	*
23	Quintana Roo	3	Isla Mujeres	466	Rey Arturo	870518	211408	10	3	*	*	*	*	*	*	*	*	*	*	*	*	*	*	*	*	*	*	*	*	*	*	*	*	*	*	*	*	*	*	*	*	*	*	*	*	*	*	*	*
23	Quintana Roo	3	Isla Mujeres	467	Ricardo Rovira Iglesias	864841	211828	1	1	*	*	*	*	*	*	*	*	*	*	*	*	*	*	*	*	*	*	*	*	*	*	*	*	*	*	*	*	*	*	*	*	*	*	*	*	*	*	*	*
23	Quintana Roo	3	Isla Mujeres	470	San Germán	864811	211929	0	3	*	*	*	*	*	*	*	*	*	*	*	*	*	*	*	*	*	*	*	*	*	*	*	*	*	*	*	*	*	*	*	*	*	*	*	*	*	*	*	*
23	Quintana Roo	3	Isla Mujeres	472	La Siria	870527	211336	10	4	*	*	*	*	*	*	*	*	*	*	*	*	*	*	*	*	*	*	*	*	*	*	*	*	*	*	*	*	*	*	*	*	*	*	*	*	*	*	*	*
23	Quintana Roo	3	Isla Mujeres	473	Tres Angelitos	870521	211313	10	2	*	*	*	*	*	*	*	*	*	*	*	*	*	*	*	*	*	*	*	*	*	*	*	*	*	*	*	*	*	*	*	*	*	*	*	*	*	*	*	*
23	Quintana Roo	3	Isla Mujeres	475	La Victoria	865143	211428	10	49	27	22	4	3	1	45	24	21	40	21	19	35	18	17	33	16	17	28	14	14	6	4	2	4	2	2	4	3	1	2	2	0	5	2	3	5	2	3	16	0
23	Quintana Roo	3	Isla Mujeres	9998	Localidades de una vivienda				188	128	60	3	2	1	182	125	57	175	123	52	159	116	43	156	115	41	138	104	34	9	2	7	14	7	7	12	7	5	3	1	2	18	11	7	22	18	4	30	26
23	Quintana Roo	3	Isla Mujeres	9999	Localidades de dos viviendas				49	33	16	0	0	0	49	33	16	45	31	14	40	28	12	39	27	12	37	25	12	6	3	3	3	2	1	3	3	0	1	1	0	2	2	0	5	2	3	7	6
23	Quintana Roo	4	Othón P. Blanco	0	Total del Municipio				244553	121906	122647	13089	6646	6443	230494	114769	115725	221128	109988	111140	188047	93082	94965	173479	85708	87771	157832	77804	80028	13929	7102	6827	28518	14585	13933	33872	17248	16624	14568	7374	7194	15647	7904	7743	33132	16453	16679	69359	18380
23	Quintana Roo	4	Othón P. Blanco	1	Chetumal	881819	183013	10	151243	74273	76970	7481	3843	3638	143094	70094	73000	137651	67289	70362	119012	57710	61302	110941	53629	57312	101962	49183	52779	8082	4173	3909	16000	8211	7789	18797	9573	9224	8071	4081	3990	8979	4446	4533	21170	10439	10731	45539	10390
23	Quintana Roo	4	Othón P. Blanco	6	Los Alacranes	881442	183415	9	1	*	*	*	*	*	*	*	*	*	*	*	*	*	*	*	*	*	*	*	*	*	*	*	*	*	*	*	*	*	*	*	*	*	*	*	*	*	*	*	*
23	Quintana Roo	4	Othón P. Blanco	7	Álvaro Obregón Viejo	883630	181819	29	169	81	88	6	4	2	163	77	86	156	75	81	131	65	66	110	53	57	100	50	50	10	3	7	22	9	13	34	18	16	21	12	9	10	3	7	23	11	12	45	10
23	Quintana Roo	4	Othón P. Blanco	8	Allende	883321	182301	29	868	456	412	55	32	23	807	421	386	764	403	361	645	343	302	586	311	275	538	284	254	55	24	31	107	54	53	137	71	66	59	32	27	48	27	21	104	55	49	217	76
23	Quintana Roo	4	Othón P. Blanco	11	Bacalar	882343	184037	20	11048	5427	5621	636	340	296	10401	5080	5321	9956	4841	5115	8391	4056	4335	7686	3710	3976	6900	3313	3587	660	348	312	1350	676	674	1637	807	830	705	346	359	786	397	389	1590	774	816	3091	881
23	Quintana Roo	4	Othón P. Blanco	12	Buenavista	881413	185251	10	585	294	291	30	11	19	555	283	272	541	276	265	478	246	232	435	228	207	397	206	191	20	10	10	57	27	30	76	33	43	43	18	25	38	22	16	59	30	29	147	81
23	Quintana Roo	4	Othón P. Blanco	14	Cacao	884142	181134	60	2056	1070	986	144	81	63	1912	989	923	1806	936	870	1474	764	710	1326	684	642	1175	613	562	161	82	79	277	143	134	335	171	164	148	80	68	151	71	80	250	123	127	520	161
23	Quintana Roo	4	Othón P. Blanco	15	El Cafetal	880648	185841	10	8	*	*	*	*	*	*	*	*	*	*	*	*	*	*	*	*	*	*	*	*	*	*	*	*	*	*	*	*	*	*	*	*	*	*	*	*	*	*	*	*
23	Quintana Roo	4	Othón P. Blanco	16	Calderitas	881530	183316	9	5326	2700	2626	318	167	151	4988	2524	2464	4771	2421	2350	4040	2069	1971	3738	1908	1830	3377	1687	1690	312	153	159	636	302	334	728	368	360	302	161	141	361	221	140	755	388	367	1400	435
23	Quintana Roo	4	Othón P. Blanco	17	Esteban Baca Calderón	884921	180035	70	222	117	105	14	9	5	208	108	100	202	104	98	176	92	84	154	81	73	138	75	63	11	7	4	21	9	12	38	19	19	22	11	11	16	6	10	19	6	13	50	35
23	Quintana Roo	4	Othón P. Blanco	18	Caobas	890615	182639	129	1412	708	704	85	41	44	1326	666	660	1269	639	630	1057	529	528	945	477	468	834	427	407	91	39	52	178	98	80	242	121	121	112	52	60	111	50	61	181	98	83	356	144
23	Quintana Roo	4	Othón P. Blanco	20	Cocoyol	884122	180959	19	1019	553	466	67	37	30	952	516	436	912	494	418	757	407	350	684	366	318	606	324	282	64	36	28	131	73	58	164	95	69	73	41	32	78	42	36	109	55	54	237	113
23	Quintana Roo	4	Othón P. Blanco	21	Limones	880630	190127	10	2535	1280	1255	169	83	86	2363	1195	1168	2234	1133	1101	1796	913	883	1608	823	785	1428	735	693	187	88	99	380	194	186	455	226	229	188	90	98	180	88	92	331	166	165	632	187
23	Quintana Roo	4	Othón P. Blanco	24	Chacchoben	881025	190212	10	728	353	375	48	25	23	679	328	351	647	319	328	561	274	287	522	255	267	475	232	243	42	17	25	76	37	39	94	45	49	39	19	20	47	23	24	90	41	49	199	106
23	Quintana Roo	4	Othón P. Blanco	27	Los Divorciados	882723	190435	34	1118	550	568	68	33	35	1049	517	532	990	490	500	799	404	395	715	365	350	625	316	309	78	36	42	172	77	95	203	87	116	84	39	45	90	49	41	130	56	74	280	105
23	Quintana Roo	4	Othón P. Blanco	31	Estero Franco	885239	175625	20	5	*	*	*	*	*	*	*	*	*	*	*	*	*	*	*	*	*	*	*	*	*	*	*	*	*	*	*	*	*	*	*	*	*	*	*	*	*	*	*	*
23	Quintana Roo	4	Othón P. Blanco	32	San Francisco Botes	884326	180645	50	580	308	272	38	19	19	542	289	253	521	276	245	435	232	203	392	206	186	348	178	170	30	16	14	77	41	36	89	50	39	43	26	17	44	28	16	65	32	33	133	64
23	Quintana Roo	4	Othón P. Blanco	33	Francisco Villa	885045	182839	80	882	449	433	61	31	30	820	418	402	785	399	386	621	304	317	550	275	275	470	228	242	59	31	28	140	83	57	172	92	80	71	29	42	80	47	33	89	35	54	219	67
23	Quintana Roo	4	Othón P. Blanco	37	Huay-Pix	882534	183104	10	1649	827	822	96	48	48	1553	779	774	1483	741	742	1239	630	609	1125	565	560	993	502	491	102	53	49	212	96	116	256	129	127	114	65	49	132	63	69	271	137	134	479	95
23	Quintana Roo	4	Othón P. Blanco	38	Jesús González Ortega	884013	182916	50	620	335	285	26	17	9	591	317	274	568	307	261	473	257	216	427	236	191	367	202	165	36	15	21	82	45	37	109	56	53	46	21	25	60	34	26	78	44	34	147	63
23	Quintana Roo	4	Othón P. Blanco	39	Juan Sarabia	882853	183011	20	1093	538	555	63	31	32	1030	507	523	985	485	500	822	396	426	752	366	386	693	331	362	76	36	40	132	75	57	160	79	81	70	30	40	59	35	24	159	70	89	307	100
23	Quintana Roo	4	Othón P. Blanco	50	Laguna Guerrero	881555	184120	4	654	338	316	39	18	21	612	319	293	574	300	274	480	250	230	444	229	215	405	208	197	45	24	21	87	45	42	92	49	43	36	21	15	39	21	18	95	44	51	163	65
23	Quintana Roo	4	Othón P. Blanco	53	Mahahual	874234	184250	1	920	483	437	60	33	27	841	440	401	789	415	374	675	353	322	641	339	302	608	320	288	75	36	39	91	51	40	91	46	45	34	14	20	33	19	14	120	60	60	259	46
23	Quintana Roo	4	Othón P. Blanco	54	El Mamey	882846	190809	30	4	*	*	*	*	*	*	*	*	*	*	*	*	*	*	*	*	*	*	*	*	*	*	*	*	*	*	*	*	*	*	*	*	*	*	*	*	*	*	*	*
23	Quintana Roo	4	Othón P. Blanco	60	Nachi Cocom	884504	182859	68	833	426	407	49	26	23	778	397	381	743	380	363	596	306	290	527	273	254	463	238	225	50	26	24	132	65	67	174	83	91	69	33	36	64	35	29	100	45	55	193	79
23	Quintana Roo	4	Othón P. Blanco	64	Nicolás Bravo	885540	182728	94	4011	1987	2024	212	94	118	3795	1891	1904	3609	1802	1807	2886	1437	1449	2578	1276	1302	2261	1132	1129	258	120	138	651	334	317	763	404	359	308	161	147	317	144	173	424	204	220	1016	374
23	Quintana Roo	4	Othón P. Blanco	67	Palmar	883150	182648	45	950	512	438	41	22	19	909	490	419	886	476	410	788	428	360	719	389	330	635	341	294	39	23	16	82	39	43	133	69	64	69	39	30	84	48	36	134	75	59	262	89
23	Quintana Roo	4	Othón P. Blanco	68	Pedro Antonio Santos	880948	185718	10	497	245	252	38	16	22	459	229	230	438	222	216	351	172	179	323	157	166	289	140	149	30	12	18	78	45	33	80	46	34	28	15	13	34	17	17	72	28	44	134	30
23	Quintana Roo	4	Othón P. Blanco	70	Revolución	884915	175827	20	84	44	40	3	3	0	81	41	40	77	39	38	64	34	30	58	30	28	49	25	24	7	3	4	10	4	6	13	7	6	6	4	2	9	5	4	9	4	5	21	8
23	Quintana Roo	4	Othón P. Blanco	73	Ramonal	883154	182509	11	901	481	420	51	22	29	847	458	389	817	440	377	671	363	308	614	331	283	552	299	253	48	24	24	128	71	57	149	84	65	57	32	25	62	32	30	103	52	51	226	68
23	Quintana Roo	4	Othón P. Blanco	74	Reforma	883419	184848	20	992	498	494	69	32	37	922	465	457	885	447	438	729	363	366	661	327	334	591	294	297	56	30	26	137	72	65	162	88	74	68	36	32	70	33	37	110	59	51	264	105
23	Quintana Roo	4	Othón P. Blanco	75	Río Indio	874003	184828	1	60	36	24	3	2	1	54	32	22	50	30	20	49	29	20	49	29	20	48	28	20	4	2	2	1	1	0	1	1	0	0	0	0	1	1	0	6	0	6	12	15
23	Quintana Roo	4	Othón P. Blanco	77	Sabidos	883522	182121	50	1342	683	659	93	45	48	1239	634	605	1181	607	574	986	519	467	918	478	440	846	437	409	84	39	45	169	76	93	184	89	95	68	41	27	72	41	31	157	69	88	348	113
23	Quintana Roo	4	Othón P. Blanco	85	San Manuel	881335	183610	1	1	*	*	*	*	*	*	*	*	*	*	*	*	*	*	*	*	*	*	*	*	*	*	*	*	*	*	*	*	*	*	*	*	*	*	*	*	*	*	*	*
23	Quintana Roo	4	Othón P. Blanco	98	Subteniente López	882335	182937	8	1915	971	944	110	54	56	1790	907	883	1717	871	846	1448	723	725	1328	668	660	1188	592	596	118	66	52	224	118	106	272	134	138	120	55	65	140	76	64	261	148	113	509	155
23	Quintana Roo	4	Othón P. Blanco	99	El Suspiro	883146	184528	30	15	8	7	2	1	1	13	7	6	12	6	6	10	5	5	9	4	5	9	4	5	2	1	1	1	1	0	2	2	0	1	1	0	0	0	0	1	1	0	3	0
23	Quintana Roo	4	Othón P. Blanco	102	Los Siete Hermanos	880846	190822	19	4	*	*	*	*	*	*	*	*	*	*	*	*	*	*	*	*	*	*	*	*	*	*	*	*	*	*	*	*	*	*	*	*	*	*	*	*	*	*	*	*
23	Quintana Roo	4	Othón P. Blanco	104	Ucum	883106	183011	26	1495	735	760	102	47	55	1393	688	705	1322	652	670	1088	544	544	992	486	506	880	433	447	99	48	51	206	96	110	225	112	113	96	58	38	112	53	59	201	101	100	408	102
23	Quintana Roo	4	Othón P. Blanco	106	La Unión	885250	175350	13	1099	583	516	57	31	26	1042	552	490	1008	533	475	814	429	385	725	380	345	641	337	304	61	34	27	167	89	78	203	107	96	89	49	40	84	43	41	127	64	63	259	108
23	Quintana Roo	4	Othón P. Blanco	107	Vallejo	882218	183051	10	5	*	*	*	*	*	*	*	*	*	*	*	*	*	*	*	*	*	*	*	*	*	*	*	*	*	*	*	*	*	*	*	*	*	*	*	*	*	*	*	*
23	Quintana Roo	4	Othón P. Blanco	108	Vallehermoso	883128	191108	30	545	273	272	38	17	21	495	250	245	474	235	239	394	191	203	372	183	189	324	162	162	32	22	10	69	37	32	69	32	37	22	8	14	48	21	27	58	27	31	136	63
23	Quintana Roo	4	Othón P. Blanco	110	Sacxán	883111	182757	25	837	419	418	63	33	30	773	385	388	744	369	375	598	291	307	542	267	275	486	238	248	50	28	22	125	66	59	135	66	69	56	24	32	56	29	27	108	46	62	226	60
23	Quintana Roo	4	Othón P. Blanco	111	Xcalak	875009	181617	1	375	189	186	22	9	13	332	169	163	314	161	153	252	130	122	231	116	115	207	105	102	26	11	15	54	28	26	57	35	22	21	14	7	24	11	13	36	16	20	94	30
23	Quintana Roo	4	Othón P. Blanco	114	Xul-Ha	882750	183306	22	2037	1035	1002	109	67	42	1928	968	960	1858	931	927	1576	789	787	1464	724	740	1343	654	689	102	53	49	250	126	124	273	148	125	112	65	47	121	70	51	257	124	133	563	206
23	Quintana Roo	4	Othón P. Blanco	115	Altos de Sevilla	884038	185106	70	605	318	287	35	18	17	570	300	270	550	293	257	448	230	218	393	207	186	338	179	159	34	15	19	88	55	33	116	63	53	55	23	32	55	28	27	75	35	40	156	44
23	Quintana Roo	4	Othón P. Blanco	116	Lázaro Cárdenas	881238	185844	10	539	277	262	24	12	12	515	265	250	486	247	239	417	211	206	372	196	176	327	173	154	30	19	11	68	35	33	95	42	53	45	15	30	45	23	22	56	34	22	128	53
23	Quintana Roo	4	Othón P. Blanco	117	Tomás Garrido Canabal	890405	180215	60	338	180	158	20	10	10	318	170	148	304	162	142	248	126	122	220	111	109	197	98	99	25	12	13	45	32	13	58	37	21	28	15	13	23	13	10	22	8	14	80	29
23	Quintana Roo	4	Othón P. Blanco	119	San Pedro Peralta	885124	184201	140	766	359	407	36	18	18	730	341	389	699	329	370	566	276	290	510	245	265	449	220	229	55	18	37	109	47	62	137	70	67	56	31	25	61	25	36	96	34	62	210	63
23	Quintana Roo	4	Othón P. Blanco	123	Javier Rojo Gómez	884052	181626	40	2911	1475	1436	140	73	67	2711	1371	1340	2608	1322	1286	2189	1096	1093	2036	1016	1020	1898	936	962	156	83	73	366	192	174	393	203	190	153	80	73	138	80	58	355	169	186	789	209
23	Quintana Roo	4	Othón P. Blanco	124	Álvaro Obregón	883921	181739	37	2869	1471	1398	166	78	88	2700	1391	1309	2604	1338	1266	2207	1148	1059	2018	1059	959	1822	957	865	160	85	75	333	158	175	412	195	217	189	89	100	196	102	94	385	190	195	737	273
23	Quintana Roo	4	Othón P. Blanco	125	Andrés Quintana Roo	883241	185025	20	96	51	45	4	2	2	92	49	43	89	47	42	70	39	31	65	36	29	58	31	27	6	3	3	16	7	9	12	6	6	5	3	2	7	5	2	7	4	3	21	16
23	Quintana Roo	4	Othón P. Blanco	126	El Bajío	883333	185658	30	2	*	*	*	*	*	*	*	*	*	*	*	*	*	*	*	*	*	*	*	*	*	*	*	*	*	*	*	*	*	*	*	*	*	*	*	*	*	*	*	*
23	Quintana Roo	4	Othón P. Blanco	128	Blanca Flor	882957	185520	30	632	326	306	37	19	18	595	307	288	577	299	278	483	247	236	437	230	207	386	205	181	29	15	14	83	45	38	102	51	51	46	17	29	51	25	26	94	48	46	158	63
23	Quintana Roo	4	Othón P. Blanco	129	Buena Esperanza	883828	185625	75	398	207	191	19	11	8	379	196	183	361	187	174	300	159	141	268	143	125	235	124	111	27	12	15	52	25	27	71	36	35	32	16	16	33	19	14	57	32	25	102	33
23	Quintana Roo	4	Othón P. Blanco	130	La Buena Fe	883027	185859	30	237	118	119	14	5	9	223	113	110	212	109	103	164	83	81	150	78	72	132	68	64	17	7	10	42	23	19	41	22	19	14	5	9	18	10	8	23	12	11	54	20
23	Quintana Roo	4	Othón P. Blanco	134	Caan Lumil	882304	185418	29	364	194	170	29	15	14	335	179	156	320	171	149	242	122	120	204	104	100	169	88	81	22	11	11	71	46	25	88	49	39	38	18	20	35	16	19	42	22	20	83	19
23	Quintana Roo	4	Othón P. Blanco	136	Carlos A. Madrazo	883121	183008	26	1825	901	924	92	43	49	1730	856	874	1656	818	838	1370	671	699	1265	623	642	1159	575	584	107	51	56	253	134	119	269	133	136	105	48	57	106	48	58	223	109	114	498	148
23	Quintana Roo	4	Othón P. Blanco	143	David Gustavo Gutiérrez Ruiz	884218	185348	40	384	196	188	22	12	10	361	183	178	345	174	171	282	141	141	251	129	122	215	106	109	21	12	9	58	30	28	68	30	38	31	12	19	36	23	13	51	26	25	96	28
23	Quintana Roo	4	Othón P. Blanco	144	Zamora	884733	190450	69	434	213	221	29	10	19	404	203	201	385	197	188	319	157	162	284	137	147	248	121	127	28	13	15	57	33	24	69	40	29	35	20	15	36	16	20	56	27	29	117	43
23	Quintana Roo	4	Othón P. Blanco	148	Francisco Villa	885328	190640	60	106	49	57	6	3	3	100	46	54	91	41	50	73	36	37	62	31	31	57	29	28	11	6	5	16	4	12	24	8	16	11	5	6	5	2	3	13	7	6	24	10
23	Quintana Roo	4	Othón P. Blanco	149	Gabino Vázquez	884505	190235	42	52	25	27	2	1	1	50	24	26	47	23	24	33	18	15	30	16	14	28	16	12	5	1	4	12	5	7	12	6	6	3	2	1	2	0	2	7	5	2	10	5
23	Quintana Roo	4	Othón P. Blanco	150	La Pantera	882933	190826	30	865	435	430	52	24	28	813	411	402	764	384	380	613	312	301	558	288	270	496	253	243	78	39	39	122	60	62	132	63	69	55	24	31	62	35	27	96	42	54	205	71
23	Quintana Roo	4	Othón P. Blanco	152	Guadalupe Victoria	883554	190747	30	415	214	201	31	14	17	384	200	184	361	191	170	270	145	125	233	127	106	194	111	83	33	13	20	81	42	39	94	48	46	37	18	19	39	16	23	44	26	18	89	24
23	Quintana Roo	4	Othón P. Blanco	162	La Ceiba	883005	184732	28	156	82	74	7	2	5	149	80	69	142	78	64	113	61	52	105	55	50	96	51	45	9	4	5	27	15	12	26	16	10	8	6	2	9	4	5	18	10	8	35	21
23	Quintana Roo	4	Othón P. Blanco	163	Lázaro Cárdenas Segundo	885129	184205	140	699	346	353	46	20	26	653	326	327	621	312	309	511	257	254	460	235	225	412	219	193	45	20	25	97	49	48	115	56	59	51	22	29	48	16	32	85	48	37	180	47
23	Quintana Roo	4	Othón P. Blanco	164	San José los Lirios	884016	190035	40	11	*	*	*	*	*	*	*	*	*	*	*	*	*	*	*	*	*	*	*	*	*	*	*	*	*	*	*	*	*	*	*	*	*	*	*	*	*	*	*	*
23	Quintana Roo	4	Othón P. Blanco	165	Manuel Ávila Camacho	882507	190227	22	716	358	358	48	25	23	668	333	335	639	319	320	545	266	279	478	230	248	424	203	221	42	22	20	81	45	36	116	64	52	67	36	31	54	27	27	70	30	40	185	88
23	Quintana Roo	4	Othón P. Blanco	166	Margarita Maza de Juárez	883536	190510	38	222	115	107	9	3	6	213	112	101	205	108	97	167	89	78	152	85	67	138	77	61	13	7	6	33	16	17	38	15	23	15	4	11	14	8	6	22	13	9	47	29
23	Quintana Roo	4	Othón P. Blanco	168	Miguel Hidalgo y Costilla	882039	185000	10	676	346	330	56	28	28	620	318	302	585	301	284	464	244	220	405	214	191	346	185	161	51	23	28	105	51	54	128	62	66	59	30	29	59	29	30	86	47	39	162	46
23	Quintana Roo	4	Othón P. Blanco	176	Nuevo Jerusalén	883411	185945	31	433	231	202	31	16	15	402	215	187	376	201	175	308	172	136	280	155	125	250	136	114	34	15	19	60	28	32	66	36	30	28	17	11	30	19	11	68	37	31	99	40
23	Quintana Roo	4	Othón P. Blanco	179	El Paraíso	884040	185327	40	122	67	55	7	6	1	115	61	54	107	57	50	89	49	40	82	45	37	77	42	35	10	4	6	16	8	8	19	9	10	7	4	3	5	3	2	19	10	9	29	8
23	Quintana Roo	4	Othón P. Blanco	184	Pucté	883941	181400	40	1861	958	903	112	56	56	1749	902	847	1671	865	806	1389	720	669	1258	656	602	1161	606	555	118	58	60	242	124	118	290	145	145	131	64	67	97	50	47	246	132	114	486	150
23	Quintana Roo	4	Othón P. Blanco	189	San Fernando	883643	185925	40	245	118	127	21	9	12	224	109	115	217	107	110	173	87	86	154	81	73	134	71	63	11	3	8	40	19	21	44	19	25	19	6	13	20	10	10	40	20	20	62	17
23	Quintana Roo	4	Othón P. Blanco	190	San Fernando	881533	183509	10	9	4	5	0	0	0	9	4	5	9	4	5	9	4	5	7	4	3	6	3	3	0	0	0	0	0	0	2	0	2	2	0	2	1	1	0	1	0	1	3	0
23	Quintana Roo	4	Othón P. Blanco	191	San Isidro	882720	183427	30	1	*	*	*	*	*	*	*	*	*	*	*	*	*	*	*	*	*	*	*	*	*	*	*	*	*	*	*	*	*	*	*	*	*	*	*	*	*	*	*	*
23	Quintana Roo	4	Othón P. Blanco	197	Juan Luis	881535	183427	10	4	*	*	*	*	*	*	*	*	*	*	*	*	*	*	*	*	*	*	*	*	*	*	*	*	*	*	*	*	*	*	*	*	*	*	*	*	*	*	*	*
23	Quintana Roo	4	Othón P. Blanco	200	San Román	884338	184744	84	530	275	255	28	17	11	502	258	244	476	240	236	374	193	181	324	165	159	278	139	139	34	21	13	94	44	50	115	60	55	50	28	22	46	26	20	63	26	37	127	37
23	Quintana Roo	4	Othón P. Blanco	201	Sergio Butrón Casas	883409	183056	30	2235	1153	1082	112	49	63	2120	1102	1018	2041	1062	979	1761	920	841	1639	859	780	1486	773	713	106	51	55	253	131	122	296	154	142	122	61	61	153	86	67	262	142	120	565	259
23	Quintana Roo	4	Othón P. Blanco	203	Tierra Negra	884254	185615	90	212	112	100	13	8	5	199	104	95	187	98	89	151	77	74	136	67	69	128	66	62	20	10	10	28	17	11	34	24	10	15	10	5	8	1	7	29	13	16	54	14
23	Quintana Roo	4	Othón P. Blanco	205	Tres Garantías	885858	181133	158	790	416	374	44	25	19	746	391	355	713	372	341	579	302	277	516	268	248	462	238	224	49	28	21	118	61	57	148	74	74	63	34	29	54	30	24	84	41	43	178	96
23	Quintana Roo	4	Othón P. Blanco	212	Huatusco	885040	185218	69	435	223	212	20	9	11	415	214	201	406	211	195	335	180	155	298	156	142	257	138	119	20	7	13	60	27	33	80	42	38	37	24	13	41	18	23	42	23	19	114	40
23	Quintana Roo	4	Othón P. Blanco	214	La Adelita	882621	183618	10	2	*	*	*	*	*	*	*	*	*	*	*	*	*	*	*	*	*	*	*	*	*	*	*	*	*	*	*	*	*	*	*	*	*	*	*	*	*	*	*	*
23	Quintana Roo	4	Othón P. Blanco	216	Arco Iris	882806	183212	30	38	19	19	3	2	1	35	17	18	35	17	18	27	13	14	25	11	14	23	11	12	1	1	0	7	3	4	7	4	3	2	2	0	2	0	2	3	2	1	10	2
23	Quintana Roo	4	Othón P. Blanco	219	El Calvario	882938	190722	30	3	*	*	*	*	*	*	*	*	*	*	*	*	*	*	*	*	*	*	*	*	*	*	*	*	*	*	*	*	*	*	*	*	*	*	*	*	*	*	*	*
23	Quintana Roo	4	Othón P. Blanco	220	La Carlota	882655	183515	21	3	*	*	*	*	*	*	*	*	*	*	*	*	*	*	*	*	*	*	*	*	*	*	*	*	*	*	*	*	*	*	*	*	*	*	*	*	*	*	*	*
23	Quintana Roo	4	Othón P. Blanco	221	El Cedralito	884416	185559	90	236	121	115	15	7	8	221	114	107	210	108	102	160	83	77	131	70	61	111	60	51	14	7	7	47	24	23	57	28	29	29	13	16	20	10	10	26	15	11	51	9
23	Quintana Roo	4	Othón P. Blanco	225	Luis Echeverría Álvarez	881306	183924	10	899	461	438	37	13	24	808	422	386	780	409	371	663	346	317	600	317	283	545	287	258	51	25	26	94	51	43	123	62	61	63	29	34	55	30	25	105	53	52	228	83
23	Quintana Roo	4	Othón P. Blanco	227	Dieciocho de Marzo	884828	190446	60	239	123	116	19	5	14	220	118	102	202	106	96	155	86	69	136	78	58	119	66	53	24	14	10	41	18	23	50	25	25	19	8	11	17	12	5	23	15	8	38	26
23	Quintana Roo	4	Othón P. Blanco	229	Dos Aguadas	890843	180734	150	188	99	89	11	5	6	177	94	83	168	86	82	132	67	65	119	61	58	98	50	48	13	9	4	32	18	14	42	21	21	13	6	7	21	11	10	23	12	11	49	8
23	Quintana Roo	4	Othón P. Blanco	235	Francisco J. Mújica	884226	185910	41	129	69	60	5	1	4	124	68	56	120	66	54	103	57	46	96	56	40	87	48	39	10	7	3	11	4	7	17	5	12	7	1	6	9	8	1	17	10	7	27	19
23	Quintana Roo	4	Othón P. Blanco	238	Iturbide	883804	190235	30	102	46	56	4	3	1	98	43	55	90	41	49	62	29	33	55	27	28	45	20	25	11	3	8	25	11	14	27	10	17	7	2	5	10	7	3	8	1	7	22	6
23	Quintana Roo	4	Othón P. Blanco	240	Limonar	885236	184741	109	176	94	82	17	9	8	159	85	74	152	82	70	125	69	56	109	63	46	96	56	40	12	6	6	22	10	12	30	13	17	16	6	10	13	7	6	23	12	11	40	16
23	Quintana Roo	4	Othón P. Blanco	245	Morocoy	884839	183609	70	1293	662	631	58	28	30	1235	634	601	1186	607	579	1006	509	497	908	460	448	795	398	397	77	41	36	152	84	68	205	107	98	98	49	49	113	62	51	173	86	87	331	125
23	Quintana Roo	4	Othón P. Blanco	252	Nuevo Bécar	890750	184328	131	557	271	286	29	10	19	528	261	267	506	249	257	422	211	211	374	185	189	325	159	166	36	21	15	70	29	41	102	48	54	48	26	22	49	26	23	63	32	31	132	62
23	Quintana Roo	4	Othón P. Blanco	253	Nuevo Hoctún	884314	190431	50	8	*	*	*	*	*	*	*	*	*	*	*	*	*	*	*	*	*	*	*	*	*	*	*	*	*	*	*	*	*	*	*	*	*	*	*	*	*	*	*	*
23	Quintana Roo	4	Othón P. Blanco	255	El Progreso	883932	190450	32	161	87	74	10	7	3	151	80	71	148	78	70	111	61	50	106	58	48	100	55	45	7	2	5	33	17	16	24	13	11	5	3	2	6	3	3	18	11	7	34	18
23	Quintana Roo	4	Othón P. Blanco	259	Otilio Montaño	884956	190031	103	350	186	164	15	8	7	335	178	157	320	172	148	253	135	118	222	117	105	183	97	86	27	14	13	55	29	26	71	42	29	31	18	13	39	20	19	52	28	24	90	23
23	Quintana Roo	4	Othón P. Blanco	264	Raudales	881514	184236	10	245	129	116	22	14	8	223	115	108	211	109	102	178	98	80	168	92	76	155	84	71	19	9	10	26	8	18	23	10	13	10	6	4	13	8	5	35	16	19	61	27
23	Quintana Roo	4	Othón P. Blanco	265	Río Escondido	884513	185255	63	290	153	137	11	4	7	279	149	130	268	143	125	225	117	108	194	103	91	168	89	79	20	12	8	34	20	14	57	28	29	31	14	17	26	14	12	30	19	11	70	37
23	Quintana Roo	4	Othón P. Blanco	266	Río Verde	890218	190211	70	462	245	217	19	11	8	442	233	209	430	227	203	367	191	176	326	169	157	280	151	129	19	10	9	56	32	24	81	46	35	41	22	19	46	18	28	96	53	43	133	34
23	Quintana Roo	4	Othón P. Blanco	267	José Narciso Rovirosa	884338	180620	46	1107	592	515	61	33	28	1045	559	486	994	530	464	833	451	382	763	412	351	699	375	324	82	42	40	130	66	64	162	87	75	70	39	31	64	37	27	129	68	61	260	116
23	Quintana Roo	4	Othón P. Blanco	270	San Felipe Bacalar	882030	184532	17	1	*	*	*	*	*	*	*	*	*	*	*	*	*	*	*	*	*	*	*	*	*	*	*	*	*	*	*	*	*	*	*	*	*	*	*	*	*	*	*	*
23	Quintana Roo	4	Othón P. Blanco	290	Cinco de Mayo	890807	184715	126	92	46	46	5	2	3	87	44	43	84	43	41	67	38	29	60	33	27	51	29	22	4	1	3	16	5	11	20	8	12	7	5	2	9	4	5	10	6	4	21	10
23	Quintana Roo	4	Othón P. Blanco	293	Dos Hermanos	890718	182821	140	1	*	*	*	*	*	*	*	*	*	*	*	*	*	*	*	*	*	*	*	*	*	*	*	*	*	*	*	*	*	*	*	*	*	*	*	*	*	*	*	*
23	Quintana Roo	4	Othón P. Blanco	298	El Gallito	885509	185909	90	88	51	37	5	1	4	83	50	33	80	47	33	65	36	29	57	33	24	50	29	21	3	3	0	15	11	4	20	12	8	8	3	5	7	4	3	16	11	5	20	8
23	Quintana Roo	4	Othón P. Blanco	301	Gustavo Díaz Ordaz	882404	191047	30	52	29	23	2	1	1	50	28	22	49	27	22	38	22	16	34	19	15	33	18	15	3	2	1	9	4	5	8	5	3	4	3	1	1	1	0	6	3	3	12	7
23	Quintana Roo	4	Othón P. Blanco	302	Isidro Fabela	885143	185434	110	83	42	41	5	5	0	78	37	41	74	36	38	62	33	29	54	27	27	49	25	24	5	1	4	11	3	8	17	7	10	8	6	2	5	2	3	10	4	6	22	7
23	Quintana Roo	4	Othón P. Blanco	303	La Libertad	885127	184538	120	421	219	202	19	8	11	401	210	191	388	201	187	308	162	146	262	138	124	223	115	108	21	13	8	72	35	37	100	51	49	46	24	22	39	23	16	49	21	28	102	29
23	Quintana Roo	4	Othón P. Blanco	305	Nuevo Caanán	890408	184919	100	221	110	111	18	8	10	200	101	99	186	95	91	151	80	71	133	69	64	115	61	54	20	10	10	29	11	18	37	19	18	18	11	7	18	8	10	34	18	16	47	15
23	Quintana Roo	4	Othón P. Blanco	309	Payo Obispo	885536	185203	70	120	67	53	6	2	4	114	65	49	106	60	46	90	49	41	81	43	38	76	42	34	10	6	4	14	10	4	18	12	6	9	6	3	5	1	4	20	9	11	29	10
23	Quintana Roo	4	Othón P. Blanco	311	Petén Tunich	882509	191148	30	2	*	*	*	*	*	*	*	*	*	*	*	*	*	*	*	*	*	*	*	*	*	*	*	*	*	*	*	*	*	*	*	*	*	*	*	*	*	*	*	*
23	Quintana Roo	4	Othón P. Blanco	314	Punta Gavilán Uno	874808	182113	1	5	*	*	*	*	*	*	*	*	*	*	*	*	*	*	*	*	*	*	*	*	*	*	*	*	*	*	*	*	*	*	*	*	*	*	*	*	*	*	*	*
23	Quintana Roo	4	Othón P. Blanco	319	San José de la Montaña	890047	182224	149	195	111	84	19	7	12	176	104	72	169	100	69	143	84	59	130	77	53	116	68	48	12	8	4	21	12	9	27	16	11	13	7	6	14	9	5	22	13	9	41	25
23	Quintana Roo	4	Othón P. Blanco	320	El Encanto	882053	184853	20	4	*	*	*	*	*	*	*	*	*	*	*	*	*	*	*	*	*	*	*	*	*	*	*	*	*	*	*	*	*	*	*	*	*	*	*	*	*	*	*	*
23	Quintana Roo	4	Othón P. Blanco	327	Veracruz	890520	184411	98	148	85	63	16	10	6	132	75	57	123	71	52	104	60	44	94	52	42	89	50	39	14	7	7	14	8	6	17	11	6	10	8	2	5	2	3	18	8	10	33	15
23	Quintana Roo	4	Othón P. Blanco	328	Villa de Cortés	875416	185656	10	5	*	*	*	*	*	*	*	*	*	*	*	*	*	*	*	*	*	*	*	*	*	*	*	*	*	*	*	*	*	*	*	*	*	*	*	*	*	*	*	*
23	Quintana Roo	4	Othón P. Blanco	330	Tres Reyes	880350	185838	10	1	*	*	*	*	*	*	*	*	*	*	*	*	*	*	*	*	*	*	*	*	*	*	*	*	*	*	*	*	*	*	*	*	*	*	*	*	*	*	*	*
23	Quintana Roo	4	Othón P. Blanco	334	Agua Dulce	883635	182024	19	3	*	*	*	*	*	*	*	*	*	*	*	*	*	*	*	*	*	*	*	*	*	*	*	*	*	*	*	*	*	*	*	*	*	*	*	*	*	*	*	*
23	Quintana Roo	4	Othón P. Blanco	355	La Victoria	884500	183209	69	4	*	*	*	*	*	*	*	*	*	*	*	*	*	*	*	*	*	*	*	*	*	*	*	*	*	*	*	*	*	*	*	*	*	*	*	*	*	*	*	*
23	Quintana Roo	4	Othón P. Blanco	356	Tito	882508	185011	21	6	*	*	*	*	*	*	*	*	*	*	*	*	*	*	*	*	*	*	*	*	*	*	*	*	*	*	*	*	*	*	*	*	*	*	*	*	*	*	*	*
23	Quintana Roo	4	Othón P. Blanco	358	El Cadiraiz	881442	190104	10	1	*	*	*	*	*	*	*	*	*	*	*	*	*	*	*	*	*	*	*	*	*	*	*	*	*	*	*	*	*	*	*	*	*	*	*	*	*	*	*	*
23	Quintana Roo	4	Othón P. Blanco	363	Xahuachol	874532	183036	1	3	*	*	*	*	*	*	*	*	*	*	*	*	*	*	*	*	*	*	*	*	*	*	*	*	*	*	*	*	*	*	*	*	*	*	*	*	*	*	*	*
23	Quintana Roo	4	Othón P. Blanco	365	Xóchitl	882234	183102	10	12	*	*	*	*	*	*	*	*	*	*	*	*	*	*	*	*	*	*	*	*	*	*	*	*	*	*	*	*	*	*	*	*	*	*	*	*	*	*	*	*
23	Quintana Roo	4	Othón P. Blanco	367	Inchatiro	882733	183136	27	5	*	*	*	*	*	*	*	*	*	*	*	*	*	*	*	*	*	*	*	*	*	*	*	*	*	*	*	*	*	*	*	*	*	*	*	*	*	*	*	*
23	Quintana Roo	4	Othón P. Blanco	372	California	890343	184609	89	44	27	17	4	3	1	40	24	16	37	23	14	31	20	11	30	19	11	27	16	11	4	2	2	5	2	3	4	2	2	1	1	0	3	3	0	7	3	4	7	6
23	Quintana Roo	4	Othón P. Blanco	379	Centro de Conservación e Investigación de la Vida Silvestre	882450	184624	20	4	*	*	*	*	*	*	*	*	*	*	*	*	*	*	*	*	*	*	*	*	*	*	*	*	*	*	*	*	*	*	*	*	*	*	*	*	*	*	*	*
23	Quintana Roo	4	Othón P. Blanco	403	San Cosme	882601	185511	30	2	*	*	*	*	*	*	*	*	*	*	*	*	*	*	*	*	*	*	*	*	*	*	*	*	*	*	*	*	*	*	*	*	*	*	*	*	*	*	*	*
23	Quintana Roo	4	Othón P. Blanco	406	El Arca	882642	183541	20	3	*	*	*	*	*	*	*	*	*	*	*	*	*	*	*	*	*	*	*	*	*	*	*	*	*	*	*	*	*	*	*	*	*	*	*	*	*	*	*	*
23	Quintana Roo	4	Othón P. Blanco	407	Emiliano Zapata	885426	182758	80	3	*	*	*	*	*	*	*	*	*	*	*	*	*	*	*	*	*	*	*	*	*	*	*	*	*	*	*	*	*	*	*	*	*	*	*	*	*	*	*	*
23	Quintana Roo	4	Othón P. Blanco	424	El Caballo Blanco	882505	183111	10	3	*	*	*	*	*	*	*	*	*	*	*	*	*	*	*	*	*	*	*	*	*	*	*	*	*	*	*	*	*	*	*	*	*	*	*	*	*	*	*	*
23	Quintana Roo	4	Othón P. Blanco	429	Caanán	884958	190900	42	111	64	47	8	8	0	103	56	47	94	50	44	75	42	33	67	37	30	59	31	28	15	9	6	13	5	8	16	9	7	8	5	3	8	6	2	16	9	7	26	3
23	Quintana Roo	4	Othón P. Blanco	442	Cinco Hermanos	881737	184919	20	7	*	*	*	*	*	*	*	*	*	*	*	*	*	*	*	*	*	*	*	*	*	*	*	*	*	*	*	*	*	*	*	*	*	*	*	*	*	*	*	*
23	Quintana Roo	4	Othón P. Blanco	447	El Cedral	885833	184210	90	284	151	133	22	8	14	262	143	119	252	136	116	208	110	98	185	99	86	162	84	78	12	8	4	42	25	17	51	29	22	23	11	12	23	15	8	41	20	21	69	24
23	Quintana Roo	4	Othón P. Blanco	449	Aarón Merino [Colonia]	882319	184222	20	46	27	19	1	0	1	45	27	18	43	26	17	39	24	15	37	24	13	37	24	13	3	1	2	3	2	1	5	2	3	2	0	2	0	0	0	7	6	1	8	5
23	Quintana Roo	4	Othón P. Blanco	451	Los Compadres	880835	185723	10	10	3	7	0	0	0	10	3	7	10	3	7	8	3	5	8	3	5	7	2	5	0	0	0	2	0	2	1	0	1	0	0	0	1	1	0	1	0	1	3	0
23	Quintana Roo	4	Othón P. Blanco	471	División del Sur	884147	184810	87	10	*	*	*	*	*	*	*	*	*	*	*	*	*	*	*	*	*	*	*	*	*	*	*	*	*	*	*	*	*	*	*	*	*	*	*	*	*	*	*	*
23	Quintana Roo	4	Othón P. Blanco	472	Dos Hermanos	874345	183843	1	1	*	*	*	*	*	*	*	*	*	*	*	*	*	*	*	*	*	*	*	*	*	*	*	*	*	*	*	*	*	*	*	*	*	*	*	*	*	*	*	*
23	Quintana Roo	4	Othón P. Blanco	475	Emiliano Zapata	881534	183503	10	1	*	*	*	*	*	*	*	*	*	*	*	*	*	*	*	*	*	*	*	*	*	*	*	*	*	*	*	*	*	*	*	*	*	*	*	*	*	*	*	*
23	Quintana Roo	4	Othón P. Blanco	479	Erick Paolo Martínez	882757	183141	26	5	*	*	*	*	*	*	*	*	*	*	*	*	*	*	*	*	*	*	*	*	*	*	*	*	*	*	*	*	*	*	*	*	*	*	*	*	*	*	*	*
23	Quintana Roo	4	Othón P. Blanco	485	La Esperanza	881005	190815	19	2	*	*	*	*	*	*	*	*	*	*	*	*	*	*	*	*	*	*	*	*	*	*	*	*	*	*	*	*	*	*	*	*	*	*	*	*	*	*	*	*
23	Quintana Roo	4	Othón P. Blanco	509	La Esperanza	884127	182856	50	3	*	*	*	*	*	*	*	*	*	*	*	*	*	*	*	*	*	*	*	*	*	*	*	*	*	*	*	*	*	*	*	*	*	*	*	*	*	*	*	*
23	Quintana Roo	4	Othón P. Blanco	511	De Guadalupe	881057	190323	19	1	*	*	*	*	*	*	*	*	*	*	*	*	*	*	*	*	*	*	*	*	*	*	*	*	*	*	*	*	*	*	*	*	*	*	*	*	*	*	*	*
23	Quintana Roo	4	Othón P. Blanco	513	La Herradura	874333	183932	0	5	*	*	*	*	*	*	*	*	*	*	*	*	*	*	*	*	*	*	*	*	*	*	*	*	*	*	*	*	*	*	*	*	*	*	*	*	*	*	*	*
23	Quintana Roo	4	Othón P. Blanco	523	El Henequén	874121	184607	1	2	*	*	*	*	*	*	*	*	*	*	*	*	*	*	*	*	*	*	*	*	*	*	*	*	*	*	*	*	*	*	*	*	*	*	*	*	*	*	*	*
23	Quintana Roo	4	Othón P. Blanco	524	San Carlos	874119	184610	1	13	*	*	*	*	*	*	*	*	*	*	*	*	*	*	*	*	*	*	*	*	*	*	*	*	*	*	*	*	*	*	*	*	*	*	*	*	*	*	*	*
23	Quintana Roo	4	Othón P. Blanco	542	Jesús Martínez Ross	884448	190342	60	140	71	69	10	6	4	130	65	65	122	62	60	103	55	48	89	46	43	81	43	38	9	3	6	18	7	11	26	14	12	14	9	5	8	3	5	19	9	10	34	9
23	Quintana Roo	4	Othón P. Blanco	553	Unicornio	882916	183348	43	1	*	*	*	*	*	*	*	*	*	*	*	*	*	*	*	*	*	*	*	*	*	*	*	*	*	*	*	*	*	*	*	*	*	*	*	*	*	*	*	*
23	Quintana Roo	4	Othón P. Blanco	555	La Juventud	884933	181655	50	3	3	0	0	0	0	3	3	0	3	3	0	3	3	0	3	3	0	3	3	0	0	0	0	0	0	0	0	0	0	0	0	0	0	0	0	0	0	0	0	2
23	Quintana Roo	4	Othón P. Blanco	556	Kaluma	881522	183613	10	7	*	*	*	*	*	*	*	*	*	*	*	*	*	*	*	*	*	*	*	*	*	*	*	*	*	*	*	*	*	*	*	*	*	*	*	*	*	*	*	*
23	Quintana Roo	4	Othón P. Blanco	558	Reel Loco	874335	183942	1	5	*	*	*	*	*	*	*	*	*	*	*	*	*	*	*	*	*	*	*	*	*	*	*	*	*	*	*	*	*	*	*	*	*	*	*	*	*	*	*	*
23	Quintana Roo	4	Othón P. Blanco	561	Kuchumatán	882424	185755	30	1019	518	501	69	33	36	950	485	465	913	465	448	736	370	366	620	323	297	522	275	247	55	30	25	159	85	74	240	110	130	116	47	69	98	48	50	160	89	71	247	58
23	Quintana Roo	4	Othón P. Blanco	563	Los Laureles	881726	184941	20	2	*	*	*	*	*	*	*	*	*	*	*	*	*	*	*	*	*	*	*	*	*	*	*	*	*	*	*	*	*	*	*	*	*	*	*	*	*	*	*	*
23	Quintana Roo	4	Othón P. Blanco	571	La Lupita	882202	183053	10	4	*	*	*	*	*	*	*	*	*	*	*	*	*	*	*	*	*	*	*	*	*	*	*	*	*	*	*	*	*	*	*	*	*	*	*	*	*	*	*	*
23	Quintana Roo	4	Othón P. Blanco	583	Maya Balam	882359	185621	30	2018	1073	945	176	91	85	1841	982	859	1747	931	816	1362	717	645	1190	626	564	1018	538	480	148	74	74	331	191	140	410	227	183	172	91	81	172	88	84	302	164	138	488	82
23	Quintana Roo	4	Othón P. Blanco	586	Melchor Ocampo	885633	190324	70	382	181	201	23	14	9	359	167	192	338	160	178	267	136	131	228	115	113	202	102	100	30	10	20	62	21	41	83	37	46	39	21	18	26	13	13	53	30	23	92	23
23	Quintana Roo	4	Othón P. Blanco	594	Monte Olivo	884547	191046	39	46	25	21	4	0	4	42	25	17	40	24	16	37	22	15	36	22	14	33	20	13	2	1	1	3	2	1	3	1	2	1	0	1	3	2	1	9	6	3	11	5
23	Quintana Roo	4	Othón P. Blanco	598	El Vergel	882741	183121	21	4	*	*	*	*	*	*	*	*	*	*	*	*	*	*	*	*	*	*	*	*	*	*	*	*	*	*	*	*	*	*	*	*	*	*	*	*	*	*	*	*
23	Quintana Roo	4	Othón P. Blanco	605	Icaiché	890944	180240	90	172	92	80	14	4	10	158	88	70	146	83	63	109	65	44	94	54	40	83	45	38	18	9	9	31	14	17	39	24	15	15	11	4	11	9	2	20	12	8	33	9
23	Quintana Roo	4	Othón P. Blanco	614	El Palomar	882039	183026	10	9	3	6	1	0	1	8	3	5	8	3	5	7	3	4	7	3	4	7	3	4	0	0	0	1	0	1	1	0	1	0	0	0	0	0	0	2	1	1	3	1
23	Quintana Roo	4	Othón P. Blanco	615	Las Dos Y	881526	183608	10	5	*	*	*	*	*	*	*	*	*	*	*	*	*	*	*	*	*	*	*	*	*	*	*	*	*	*	*	*	*	*	*	*	*	*	*	*	*	*	*	*
23	Quintana Roo	4	Othón P. Blanco	619	El Paraíso	882540	183643	10	1	*	*	*	*	*	*	*	*	*	*	*	*	*	*	*	*	*	*	*	*	*	*	*	*	*	*	*	*	*	*	*	*	*	*	*	*	*	*	*	*
23	Quintana Roo	4	Othón P. Blanco	621	El Paraíso	882910	185833	31	1	*	*	*	*	*	*	*	*	*	*	*	*	*	*	*	*	*	*	*	*	*	*	*	*	*	*	*	*	*	*	*	*	*	*	*	*	*	*	*	*
23	Quintana Roo	4	Othón P. Blanco	623	El Paraíso	881526	183602	10	1	*	*	*	*	*	*	*	*	*	*	*	*	*	*	*	*	*	*	*	*	*	*	*	*	*	*	*	*	*	*	*	*	*	*	*	*	*	*	*	*
23	Quintana Roo	4	Othón P. Blanco	627	Peto	884047	181827	40	1	*	*	*	*	*	*	*	*	*	*	*	*	*	*	*	*	*	*	*	*	*	*	*	*	*	*	*	*	*	*	*	*	*	*	*	*	*	*	*	*
23	Quintana Roo	4	Othón P. Blanco	630	Los Pinos	881527	183430	10	4	*	*	*	*	*	*	*	*	*	*	*	*	*	*	*	*	*	*	*	*	*	*	*	*	*	*	*	*	*	*	*	*	*	*	*	*	*	*	*	*
23	Quintana Roo	4	Othón P. Blanco	639	Seis Hermanos (El Ranchito)	885321	182734	81	7	*	*	*	*	*	*	*	*	*	*	*	*	*	*	*	*	*	*	*	*	*	*	*	*	*	*	*	*	*	*	*	*	*	*	*	*	*	*	*	*
23	Quintana Roo	4	Othón P. Blanco	640	El Porvenir	882137	183043	10	5	*	*	*	*	*	*	*	*	*	*	*	*	*	*	*	*	*	*	*	*	*	*	*	*	*	*	*	*	*	*	*	*	*	*	*	*	*	*	*	*
23	Quintana Roo	4	Othón P. Blanco	642	José María Pino Suárez	882415	183206	10	8	*	*	*	*	*	*	*	*	*	*	*	*	*	*	*	*	*	*	*	*	*	*	*	*	*	*	*	*	*	*	*	*	*	*	*	*	*	*	*	*
23	Quintana Roo	4	Othón P. Blanco	657	Valher	882717	183435	30	11	*	*	*	*	*	*	*	*	*	*	*	*	*	*	*	*	*	*	*	*	*	*	*	*	*	*	*	*	*	*	*	*	*	*	*	*	*	*	*	*
23	Quintana Roo	4	Othón P. Blanco	658	Las Dos Eses	884159	184831	90	1	*	*	*	*	*	*	*	*	*	*	*	*	*	*	*	*	*	*	*	*	*	*	*	*	*	*	*	*	*	*	*	*	*	*	*	*	*	*	*	*
23	Quintana Roo	4	Othón P. Blanco	671	El Rosal	882204	183047	10	13	5	8	0	0	0	13	5	8	13	5	8	12	5	7	11	4	7	10	4	6	1	0	1	0	0	0	1	1	0	1	1	0	1	0	1	4	2	2	5	1
23	Quintana Roo	4	Othón P. Blanco	674	El Puente	890216	182739	110	2	*	*	*	*	*	*	*	*	*	*	*	*	*	*	*	*	*	*	*	*	*	*	*	*	*	*	*	*	*	*	*	*	*	*	*	*	*	*	*	*
23	Quintana Roo	4	Othón P. Blanco	681	Sac Nicté	882113	183034	10	10	4	6	0	0	0	7	3	4	7	3	4	6	3	3	5	3	2	5	3	2	0	0	0	1	0	1	2	0	2	1	0	1	0	0	0	1	1	0	1	2
23	Quintana Roo	4	Othón P. Blanco	689	San Silvestre	882631	183613	18	1	*	*	*	*	*	*	*	*	*	*	*	*	*	*	*	*	*	*	*	*	*	*	*	*	*	*	*	*	*	*	*	*	*	*	*	*	*	*	*	*
23	Quintana Roo	4	Othón P. Blanco	690	Sinaí	881527	183534	10	5	*	*	*	*	*	*	*	*	*	*	*	*	*	*	*	*	*	*	*	*	*	*	*	*	*	*	*	*	*	*	*	*	*	*	*	*	*	*	*	*
23	Quintana Roo	4	Othón P. Blanco	692	El Sinaí	881341	185352	10	5	*	*	*	*	*	*	*	*	*	*	*	*	*	*	*	*	*	*	*	*	*	*	*	*	*	*	*	*	*	*	*	*	*	*	*	*	*	*	*	*
23	Quintana Roo	4	Othón P. Blanco	725	San Martín de Porres	881532	183527	10	5	*	*	*	*	*	*	*	*	*	*	*	*	*	*	*	*	*	*	*	*	*	*	*	*	*	*	*	*	*	*	*	*	*	*	*	*	*	*	*	*
23	Quintana Roo	4	Othón P. Blanco	739	Coral Garden Inn	874812	182105	1	12	*	*	*	*	*	*	*	*	*	*	*	*	*	*	*	*	*	*	*	*	*	*	*	*	*	*	*	*	*	*	*	*	*	*	*	*	*	*	*	*
23	Quintana Roo	4	Othón P. Blanco	741	Santa María	882153	183046	10	7	3	4	0	0	0	7	3	4	7	3	4	7	3	4	7	3	4	7	3	4	0	0	0	0	0	0	0	0	0	0	0	0	0	0	0	1	0	1	2	2
23	Quintana Roo	4	Othón P. Blanco	742	Las Olas Tranquilas	874335	183924	1	3	*	*	*	*	*	*	*	*	*	*	*	*	*	*	*	*	*	*	*	*	*	*	*	*	*	*	*	*	*	*	*	*	*	*	*	*	*	*	*	*
23	Quintana Roo	4	Othón P. Blanco	743	Santa Rosa	891150	180042	86	163	75	88	15	4	11	145	69	76	140	68	72	117	57	60	107	51	56	95	47	48	7	3	4	21	9	12	24	11	13	10	6	4	12	4	8	22	10	12	46	11
23	Quintana Roo	4	Othón P. Blanco	750	Don Jacobo	874544	182844	0	1	*	*	*	*	*	*	*	*	*	*	*	*	*	*	*	*	*	*	*	*	*	*	*	*	*	*	*	*	*	*	*	*	*	*	*	*	*	*	*	*
23	Quintana Roo	4	Othón P. Blanco	791	Carolina	885248	175751	140	1	*	*	*	*	*	*	*	*	*	*	*	*	*	*	*	*	*	*	*	*	*	*	*	*	*	*	*	*	*	*	*	*	*	*	*	*	*	*	*	*
23	Quintana Roo	4	Othón P. Blanco	799	Los Tres Hermanos	884856	183441	70	1	*	*	*	*	*	*	*	*	*	*	*	*	*	*	*	*	*	*	*	*	*	*	*	*	*	*	*	*	*	*	*	*	*	*	*	*	*	*	*	*
23	Quintana Roo	4	Othón P. Blanco	800	Pedro Joaquín Coldwell	883941	181520	56	786	397	389	43	14	29	742	383	359	717	371	346	599	309	290	538	282	256	474	255	219	36	19	17	107	55	52	129	64	65	61	27	34	64	27	37	99	61	38	200	65
23	Quintana Roo	4	Othón P. Blanco	809	Yumpetén	882455	190951	30	3	*	*	*	*	*	*	*	*	*	*	*	*	*	*	*	*	*	*	*	*	*	*	*	*	*	*	*	*	*	*	*	*	*	*	*	*	*	*	*	*
23	Quintana Roo	4	Othón P. Blanco	818	La Aventura	882243	183104	10	4	*	*	*	*	*	*	*	*	*	*	*	*	*	*	*	*	*	*	*	*	*	*	*	*	*	*	*	*	*	*	*	*	*	*	*	*	*	*	*	*
23	Quintana Roo	4	Othón P. Blanco	819	Buenos Aires	882256	183016	10	5	*	*	*	*	*	*	*	*	*	*	*	*	*	*	*	*	*	*	*	*	*	*	*	*	*	*	*	*	*	*	*	*	*	*	*	*	*	*	*	*
23	Quintana Roo	4	Othón P. Blanco	821	Kilómetro Diez	882331	183059	10	6	*	*	*	*	*	*	*	*	*	*	*	*	*	*	*	*	*	*	*	*	*	*	*	*	*	*	*	*	*	*	*	*	*	*	*	*	*	*	*	*
23	Quintana Roo	4	Othón P. Blanco	823	La Conchita	882251	183031	10	9	4	5	0	0	0	3	1	2	3	1	2	3	1	2	2	1	1	2	1	1	0	0	0	0	0	0	1	0	1	1	0	1	0	0	0	0	0	0	0	0
23	Quintana Roo	4	Othón P. Blanco	826	Los Encinos	882232	183033	10	1	*	*	*	*	*	*	*	*	*	*	*	*	*	*	*	*	*	*	*	*	*	*	*	*	*	*	*	*	*	*	*	*	*	*	*	*	*	*	*	*
23	Quintana Roo	4	Othón P. Blanco	829	Las Flores	882257	183025	10	8	*	*	*	*	*	*	*	*	*	*	*	*	*	*	*	*	*	*	*	*	*	*	*	*	*	*	*	*	*	*	*	*	*	*	*	*	*	*	*	*
23	Quintana Roo	4	Othón P. Blanco	830	Hermanos Lagos	882253	183029	10	1	*	*	*	*	*	*	*	*	*	*	*	*	*	*	*	*	*	*	*	*	*	*	*	*	*	*	*	*	*	*	*	*	*	*	*	*	*	*	*	*
23	Quintana Roo	4	Othón P. Blanco	840	Parque Industrial	882445	183124	10	2	*	*	*	*	*	*	*	*	*	*	*	*	*	*	*	*	*	*	*	*	*	*	*	*	*	*	*	*	*	*	*	*	*	*	*	*	*	*	*	*
23	Quintana Roo	4	Othón P. Blanco	843	Hermanos Martínez	882228	183100	10	13	9	4	0	0	0	13	9	4	12	8	4	10	7	3	9	7	2	8	6	2	1	1	0	2	1	1	2	1	1	1	0	1	1	1	0	1	1	0	1	2
23	Quintana Roo	4	Othón P. Blanco	860	Rancho Chico	881343	183554	6	1	*	*	*	*	*	*	*	*	*	*	*	*	*	*	*	*	*	*	*	*	*	*	*	*	*	*	*	*	*	*	*	*	*	*	*	*	*	*	*	*
23	Quintana Roo	4	Othón P. Blanco	880	Héctor Esquiliano Solís	881452	183352	5	1	*	*	*	*	*	*	*	*	*	*	*	*	*	*	*	*	*	*	*	*	*	*	*	*	*	*	*	*	*	*	*	*	*	*	*	*	*	*	*	*
23	Quintana Roo	4	Othón P. Blanco	885	Jesús Martínez Ross	881449	183350	0	4	*	*	*	*	*	*	*	*	*	*	*	*	*	*	*	*	*	*	*	*	*	*	*	*	*	*	*	*	*	*	*	*	*	*	*	*	*	*	*	*
23	Quintana Roo	4	Othón P. Blanco	894	Juan Luis	881600	183134	1	2	*	*	*	*	*	*	*	*	*	*	*	*	*	*	*	*	*	*	*	*	*	*	*	*	*	*	*	*	*	*	*	*	*	*	*	*	*	*	*	*
23	Quintana Roo	4	Othón P. Blanco	896	Los Abuelos	882018	183137	10	8	*	*	*	*	*	*	*	*	*	*	*	*	*	*	*	*	*	*	*	*	*	*	*	*	*	*	*	*	*	*	*	*	*	*	*	*	*	*	*	*
23	Quintana Roo	4	Othón P. Blanco	900	Las Margaritas	881545	183344	10	5	*	*	*	*	*	*	*	*	*	*	*	*	*	*	*	*	*	*	*	*	*	*	*	*	*	*	*	*	*	*	*	*	*	*	*	*	*	*	*	*
23	Quintana Roo	4	Othón P. Blanco	905	Monterrey	882131	182918	10	1	*	*	*	*	*	*	*	*	*	*	*	*	*	*	*	*	*	*	*	*	*	*	*	*	*	*	*	*	*	*	*	*	*	*	*	*	*	*	*	*
23	Quintana Roo	4	Othón P. Blanco	908	El Pedregal	881557	183304	11	12	5	7	0	0	0	12	5	7	11	5	6	11	5	6	10	4	6	9	4	5	1	0	1	0	0	0	1	1	0	1	1	0	1	0	1	0	0	0	4	3
23	Quintana Roo	4	Othón P. Blanco	912	San Andrés	882046	183027	11	3	*	*	*	*	*	*	*	*	*	*	*	*	*	*	*	*	*	*	*	*	*	*	*	*	*	*	*	*	*	*	*	*	*	*	*	*	*	*	*	*
23	Quintana Roo	4	Othón P. Blanco	914	Francisco Godoy	882105	183031	10	9	*	*	*	*	*	*	*	*	*	*	*	*	*	*	*	*	*	*	*	*	*	*	*	*	*	*	*	*	*	*	*	*	*	*	*	*	*	*	*	*
23	Quintana Roo	4	Othón P. Blanco	916	San Jorge	881545	183339	10	5	*	*	*	*	*	*	*	*	*	*	*	*	*	*	*	*	*	*	*	*	*	*	*	*	*	*	*	*	*	*	*	*	*	*	*	*	*	*	*	*
23	Quintana Roo	4	Othón P. Blanco	917	San Martín	881606	183250	11	9	5	4	0	0	0	9	5	4	9	5	4	7	4	3	6	4	2	6	4	2	1	1	0	1	0	1	2	0	2	1	0	1	0	0	0	0	0	0	1	0
23	Quintana Roo	4	Othón P. Blanco	919	San Marcos	882100	183030	10	16	8	8	1	1	0	15	7	8	14	6	8	12	5	7	11	5	6	11	5	6	1	1	0	2	1	1	2	0	2	1	0	1	0	0	0	2	0	2	5	2
23	Quintana Roo	4	Othón P. Blanco	931	El Esfuerzo	881516	183713	10	1	*	*	*	*	*	*	*	*	*	*	*	*	*	*	*	*	*	*	*	*	*	*	*	*	*	*	*	*	*	*	*	*	*	*	*	*	*	*	*	*
23	Quintana Roo	4	Othón P. Blanco	935	El Pedregal	882013	184611	10	1	*	*	*	*	*	*	*	*	*	*	*	*	*	*	*	*	*	*	*	*	*	*	*	*	*	*	*	*	*	*	*	*	*	*	*	*	*	*	*	*
23	Quintana Roo	4	Othón P. Blanco	957	Teresa	882708	183058	20	6	*	*	*	*	*	*	*	*	*	*	*	*	*	*	*	*	*	*	*	*	*	*	*	*	*	*	*	*	*	*	*	*	*	*	*	*	*	*	*	*
23	Quintana Roo	4	Othón P. Blanco	958	La Alianza	882806	183236	26	1	*	*	*	*	*	*	*	*	*	*	*	*	*	*	*	*	*	*	*	*	*	*	*	*	*	*	*	*	*	*	*	*	*	*	*	*	*	*	*	*
23	Quintana Roo	4	Othón P. Blanco	959	La Flor	882805	183227	26	6	*	*	*	*	*	*	*	*	*	*	*	*	*	*	*	*	*	*	*	*	*	*	*	*	*	*	*	*	*	*	*	*	*	*	*	*	*	*	*	*
23	Quintana Roo	4	Othón P. Blanco	960	Rancho Escondido	882742	183349	30	1	*	*	*	*	*	*	*	*	*	*	*	*	*	*	*	*	*	*	*	*	*	*	*	*	*	*	*	*	*	*	*	*	*	*	*	*	*	*	*	*
23	Quintana Roo	4	Othón P. Blanco	969	Chaparral	883125	183101	20	7	*	*	*	*	*	*	*	*	*	*	*	*	*	*	*	*	*	*	*	*	*	*	*	*	*	*	*	*	*	*	*	*	*	*	*	*	*	*	*	*
23	Quintana Roo	4	Othón P. Blanco	971	Linda Vista	882800	183229	24	13	8	5	1	1	0	12	7	5	12	7	5	10	5	5	8	4	4	8	4	4	0	0	0	2	2	0	4	3	1	2	1	1	0	0	0	0	0	0	2	3
23	Quintana Roo	4	Othón P. Blanco	973	San Pablo	883114	183052	20	8	*	*	*	*	*	*	*	*	*	*	*	*	*	*	*	*	*	*	*	*	*	*	*	*	*	*	*	*	*	*	*	*	*	*	*	*	*	*	*	*
23	Quintana Roo	4	Othón P. Blanco	978	Fernando López Domínguez	882625	183059	10	1	*	*	*	*	*	*	*	*	*	*	*	*	*	*	*	*	*	*	*	*	*	*	*	*	*	*	*	*	*	*	*	*	*	*	*	*	*	*	*	*
23	Quintana Roo	4	Othón P. Blanco	991	Lázaro Cárdenas del Río Tercero	884711	185828	100	217	116	101	14	7	7	203	109	94	191	103	88	150	80	70	131	67	64	108	56	52	14	8	6	39	21	18	46	29	17	19	13	6	23	11	12	17	8	9	47	23
23	Quintana Roo	4	Othón P. Blanco	1003	Costa de Cocos	875003	181726	1	3	*	*	*	*	*	*	*	*	*	*	*	*	*	*	*	*	*	*	*	*	*	*	*	*	*	*	*	*	*	*	*	*	*	*	*	*	*	*	*	*
23	Quintana Roo	4	Othón P. Blanco	1013	Playa Sonrisa	874902	182007	1	4	*	*	*	*	*	*	*	*	*	*	*	*	*	*	*	*	*	*	*	*	*	*	*	*	*	*	*	*	*	*	*	*	*	*	*	*	*	*	*	*
23	Quintana Roo	4	Othón P. Blanco	1033	El Castillo	874354	183727	1	2	*	*	*	*	*	*	*	*	*	*	*	*	*	*	*	*	*	*	*	*	*	*	*	*	*	*	*	*	*	*	*	*	*	*	*	*	*	*	*	*
23	Quintana Roo	4	Othón P. Blanco	1042	Miguel Alemán	890536	185449	92	688	375	313	35	15	20	653	360	293	625	347	278	504	278	226	441	245	196	388	215	173	46	22	24	103	60	43	137	76	61	63	33	30	53	30	23	89	49	40	155	59
23	Quintana Roo	4	Othón P. Blanco	1077	San Isidro la Laguna	882214	184841	20	860	437	423	65	30	35	795	407	388	753	386	367	584	303	281	500	258	242	413	218	195	60	29	31	151	75	76	191	100	91	84	45	39	87	40	47	146	80	66	207	36
23	Quintana Roo	4	Othón P. Blanco	1078	Valentín Gómez Farías	885735	190726	62	77	43	34	4	3	1	73	40	33	68	37	31	49	27	22	41	24	17	34	19	15	6	4	2	18	9	9	20	9	11	8	3	5	7	5	2	9	4	5	15	4
23	Quintana Roo	4	Othón P. Blanco	1079	Nuevo Tabasco	890248	190820	83	176	94	82	5	4	1	171	90	81	166	89	77	135	75	60	115	64	51	96	54	42	6	1	5	30	14	16	43	21	22	20	11	9	19	10	9	24	17	7	39	12
23	Quintana Roo	4	Othón P. Blanco	1080	Año Nuevo	883230	184224	40	17	*	*	*	*	*	*	*	*	*	*	*	*	*	*	*	*	*	*	*	*	*	*	*	*	*	*	*	*	*	*	*	*	*	*	*	*	*	*	*	*
23	Quintana Roo	4	Othón P. Blanco	1093	El Bobal	885108	180048	80	1	*	*	*	*	*	*	*	*	*	*	*	*	*	*	*	*	*	*	*	*	*	*	*	*	*	*	*	*	*	*	*	*	*	*	*	*	*	*	*	*
23	Quintana Roo	4	Othón P. Blanco	1097	El Mirador Arroyo	885011	175751	20	1	*	*	*	*	*	*	*	*	*	*	*	*	*	*	*	*	*	*	*	*	*	*	*	*	*	*	*	*	*	*	*	*	*	*	*	*	*	*	*	*
23	Quintana Roo	4	Othón P. Blanco	1110	Sabanitas Dos	880813	185729	10	1	*	*	*	*	*	*	*	*	*	*	*	*	*	*	*	*	*	*	*	*	*	*	*	*	*	*	*	*	*	*	*	*	*	*	*	*	*	*	*	*
23	Quintana Roo	4	Othón P. Blanco	1111	Ninguno [Corredor Frutícola]	880635	190428	18	30	15	15	3	2	1	27	13	14	27	13	14	24	13	11	23	13	10	22	12	10	0	0	0	3	0	3	3	0	3	1	0	1	1	1	0	6	3	3	7	2
23	Quintana Roo	4	Othón P. Blanco	1114	El Teco	885009	182002	70	3	*	*	*	*	*	*	*	*	*	*	*	*	*	*	*	*	*	*	*	*	*	*	*	*	*	*	*	*	*	*	*	*	*	*	*	*	*	*	*	*
23	Quintana Roo	4	Othón P. Blanco	1116	La Esperanza	883012	183422	49	4	*	*	*	*	*	*	*	*	*	*	*	*	*	*	*	*	*	*	*	*	*	*	*	*	*	*	*	*	*	*	*	*	*	*	*	*	*	*	*	*
23	Quintana Roo	4	Othón P. Blanco	1119	El Manguito	884852	183446	70	5	*	*	*	*	*	*	*	*	*	*	*	*	*	*	*	*	*	*	*	*	*	*	*	*	*	*	*	*	*	*	*	*	*	*	*	*	*	*	*	*
23	Quintana Roo	4	Othón P. Blanco	1120	San Pedro	881411	185318	18	3	*	*	*	*	*	*	*	*	*	*	*	*	*	*	*	*	*	*	*	*	*	*	*	*	*	*	*	*	*	*	*	*	*	*	*	*	*	*	*	*
23	Quintana Roo	4	Othón P. Blanco	1121	Jesús, María y José	881359	185343	13	2	*	*	*	*	*	*	*	*	*	*	*	*	*	*	*	*	*	*	*	*	*	*	*	*	*	*	*	*	*	*	*	*	*	*	*	*	*	*	*	*
23	Quintana Roo	4	Othón P. Blanco	1124	Tres Hermanos	890302	184521	100	4	*	*	*	*	*	*	*	*	*	*	*	*	*	*	*	*	*	*	*	*	*	*	*	*	*	*	*	*	*	*	*	*	*	*	*	*	*	*	*	*
23	Quintana Roo	4	Othón P. Blanco	1152	Los Cascos	882310	185759	17	3	*	*	*	*	*	*	*	*	*	*	*	*	*	*	*	*	*	*	*	*	*	*	*	*	*	*	*	*	*	*	*	*	*	*	*	*	*	*	*	*
23	Quintana Roo	4	Othón P. Blanco	1156	El Arrecife	874538	183004	1	1	*	*	*	*	*	*	*	*	*	*	*	*	*	*	*	*	*	*	*	*	*	*	*	*	*	*	*	*	*	*	*	*	*	*	*	*	*	*	*	*
23	Quintana Roo	4	Othón P. Blanco	1162	Rancho Encantado	882242	184258	11	4	*	*	*	*	*	*	*	*	*	*	*	*	*	*	*	*	*	*	*	*	*	*	*	*	*	*	*	*	*	*	*	*	*	*	*	*	*	*	*	*
23	Quintana Roo	4	Othón P. Blanco	1170	Gabriel García	880357	185838	10	2	*	*	*	*	*	*	*	*	*	*	*	*	*	*	*	*	*	*	*	*	*	*	*	*	*	*	*	*	*	*	*	*	*	*	*	*	*	*	*	*
23	Quintana Roo	4	Othón P. Blanco	1173	Xtomoc Uno	881914	184726	20	7	*	*	*	*	*	*	*	*	*	*	*	*	*	*	*	*	*	*	*	*	*	*	*	*	*	*	*	*	*	*	*	*	*	*	*	*	*	*	*	*
23	Quintana Roo	4	Othón P. Blanco	1175	Río Huache	874554	182529	0	5	*	*	*	*	*	*	*	*	*	*	*	*	*	*	*	*	*	*	*	*	*	*	*	*	*	*	*	*	*	*	*	*	*	*	*	*	*	*	*	*
23	Quintana Roo	4	Othón P. Blanco	1184	San José	874745	182211	1	4	*	*	*	*	*	*	*	*	*	*	*	*	*	*	*	*	*	*	*	*	*	*	*	*	*	*	*	*	*	*	*	*	*	*	*	*	*	*	*	*
23	Quintana Roo	4	Othón P. Blanco	1186	Leyda Alpuche	881944	184631	20	1	*	*	*	*	*	*	*	*	*	*	*	*	*	*	*	*	*	*	*	*	*	*	*	*	*	*	*	*	*	*	*	*	*	*	*	*	*	*	*	*
23	Quintana Roo	4	Othón P. Blanco	1200	La Pimientita	882017	183233	10	2	*	*	*	*	*	*	*	*	*	*	*	*	*	*	*	*	*	*	*	*	*	*	*	*	*	*	*	*	*	*	*	*	*	*	*	*	*	*	*	*
23	Quintana Roo	4	Othón P. Blanco	1212	Casa Carolina	874954	181757	1	2	*	*	*	*	*	*	*	*	*	*	*	*	*	*	*	*	*	*	*	*	*	*	*	*	*	*	*	*	*	*	*	*	*	*	*	*	*	*	*	*
23	Quintana Roo	4	Othón P. Blanco	1214	Eleazar Villanueva	881827	184347	10	1	*	*	*	*	*	*	*	*	*	*	*	*	*	*	*	*	*	*	*	*	*	*	*	*	*	*	*	*	*	*	*	*	*	*	*	*	*	*	*	*
23	Quintana Roo	4	Othón P. Blanco	1220	Casa las Palmas	874758	182149	1	2	*	*	*	*	*	*	*	*	*	*	*	*	*	*	*	*	*	*	*	*	*	*	*	*	*	*	*	*	*	*	*	*	*	*	*	*	*	*	*	*
23	Quintana Roo	4	Othón P. Blanco	1221	Xkan-Lol	881605	183254	12	19	10	9	2	2	0	17	8	9	17	8	9	15	7	8	14	7	7	10	5	5	0	0	0	2	1	1	3	1	2	1	0	1	4	2	2	1	0	1	6	2
23	Quintana Roo	4	Othón P. Blanco	1224	Armando Rodríguez	882302	183100	10	6	*	*	*	*	*	*	*	*	*	*	*	*	*	*	*	*	*	*	*	*	*	*	*	*	*	*	*	*	*	*	*	*	*	*	*	*	*	*	*	*
23	Quintana Roo	4	Othón P. Blanco	1229	El Cocal	882612	183106	10	2	*	*	*	*	*	*	*	*	*	*	*	*	*	*	*	*	*	*	*	*	*	*	*	*	*	*	*	*	*	*	*	*	*	*	*	*	*	*	*	*
23	Quintana Roo	4	Othón P. Blanco	1244	El Cedralito	890621	182806	137	11	*	*	*	*	*	*	*	*	*	*	*	*	*	*	*	*	*	*	*	*	*	*	*	*	*	*	*	*	*	*	*	*	*	*	*	*	*	*	*	*
23	Quintana Roo	4	Othón P. Blanco	1254	La Calavera	884952	182026	86	1	*	*	*	*	*	*	*	*	*	*	*	*	*	*	*	*	*	*	*	*	*	*	*	*	*	*	*	*	*	*	*	*	*	*	*	*	*	*	*	*
23	Quintana Roo	4	Othón P. Blanco	1258	El Admirable	885219	175601	20	4	*	*	*	*	*	*	*	*	*	*	*	*	*	*	*	*	*	*	*	*	*	*	*	*	*	*	*	*	*	*	*	*	*	*	*	*	*	*	*	*
23	Quintana Roo	4	Othón P. Blanco	1261	Las Tres Potrancas	883645	181914	31	12	6	6	1	1	0	11	5	6	8	3	5	8	3	5	8	3	5	6	3	3	3	2	1	0	0	0	0	0	0	0	0	0	2	0	2	3	1	2	5	0
23	Quintana Roo	4	Othón P. Blanco	1265	El Águila	883445	183258	40	1	*	*	*	*	*	*	*	*	*	*	*	*	*	*	*	*	*	*	*	*	*	*	*	*	*	*	*	*	*	*	*	*	*	*	*	*	*	*	*	*
23	Quintana Roo	4	Othón P. Blanco	1268	Cubano	881452	183749	10	6	*	*	*	*	*	*	*	*	*	*	*	*	*	*	*	*	*	*	*	*	*	*	*	*	*	*	*	*	*	*	*	*	*	*	*	*	*	*	*	*
23	Quintana Roo	4	Othón P. Blanco	1277	Ana	882630	183056	10	2	*	*	*	*	*	*	*	*	*	*	*	*	*	*	*	*	*	*	*	*	*	*	*	*	*	*	*	*	*	*	*	*	*	*	*	*	*	*	*	*
23	Quintana Roo	4	Othón P. Blanco	1278	El Resbalón	890035	182400	127	1	*	*	*	*	*	*	*	*	*	*	*	*	*	*	*	*	*	*	*	*	*	*	*	*	*	*	*	*	*	*	*	*	*	*	*	*	*	*	*	*
23	Quintana Roo	4	Othón P. Blanco	1279	Anastacio Valdez Huchin	880644	190010	10	13	*	*	*	*	*	*	*	*	*	*	*	*	*	*	*	*	*	*	*	*	*	*	*	*	*	*	*	*	*	*	*	*	*	*	*	*	*	*	*	*
23	Quintana Roo	4	Othón P. Blanco	1285	Santa Lucía	881403	183501	3	7	*	*	*	*	*	*	*	*	*	*	*	*	*	*	*	*	*	*	*	*	*	*	*	*	*	*	*	*	*	*	*	*	*	*	*	*	*	*	*	*
23	Quintana Roo	4	Othón P. Blanco	1294	Bacalar Dos	883254	184528	24	3	*	*	*	*	*	*	*	*	*	*	*	*	*	*	*	*	*	*	*	*	*	*	*	*	*	*	*	*	*	*	*	*	*	*	*	*	*	*	*	*
23	Quintana Roo	4	Othón P. Blanco	1295	Bacalar Uno	883141	184608	30	6	*	*	*	*	*	*	*	*	*	*	*	*	*	*	*	*	*	*	*	*	*	*	*	*	*	*	*	*	*	*	*	*	*	*	*	*	*	*	*	*
23	Quintana Roo	4	Othón P. Blanco	1297	Las Tres Balbinas	882611	183059	10	3	*	*	*	*	*	*	*	*	*	*	*	*	*	*	*	*	*	*	*	*	*	*	*	*	*	*	*	*	*	*	*	*	*	*	*	*	*	*	*	*
23	Quintana Roo	4	Othón P. Blanco	1298	El Barranco	890403	183102	121	2	*	*	*	*	*	*	*	*	*	*	*	*	*	*	*	*	*	*	*	*	*	*	*	*	*	*	*	*	*	*	*	*	*	*	*	*	*	*	*	*
23	Quintana Roo	4	Othón P. Blanco	1313	La Calumnia	884552	191347	40	10	*	*	*	*	*	*	*	*	*	*	*	*	*	*	*	*	*	*	*	*	*	*	*	*	*	*	*	*	*	*	*	*	*	*	*	*	*	*	*	*
23	Quintana Roo	4	Othón P. Blanco	1314	Cámara	882704	184418	30	7	*	*	*	*	*	*	*	*	*	*	*	*	*	*	*	*	*	*	*	*	*	*	*	*	*	*	*	*	*	*	*	*	*	*	*	*	*	*	*	*
23	Quintana Roo	4	Othón P. Blanco	1317	La Candelaria	882605	185426	25	1	*	*	*	*	*	*	*	*	*	*	*	*	*	*	*	*	*	*	*	*	*	*	*	*	*	*	*	*	*	*	*	*	*	*	*	*	*	*	*	*
23	Quintana Roo	4	Othón P. Blanco	1321	La Carmelita	882520	184304	30	2	*	*	*	*	*	*	*	*	*	*	*	*	*	*	*	*	*	*	*	*	*	*	*	*	*	*	*	*	*	*	*	*	*	*	*	*	*	*	*	*
23	Quintana Roo	4	Othón P. Blanco	1322	El Carmen	883831	181318	43	1	*	*	*	*	*	*	*	*	*	*	*	*	*	*	*	*	*	*	*	*	*	*	*	*	*	*	*	*	*	*	*	*	*	*	*	*	*	*	*	*
23	Quintana Roo	4	Othón P. Blanco	1328	Celestino Interián	883749	181621	51	1	*	*	*	*	*	*	*	*	*	*	*	*	*	*	*	*	*	*	*	*	*	*	*	*	*	*	*	*	*	*	*	*	*	*	*	*	*	*	*	*
23	Quintana Roo	4	Othón P. Blanco	1332	El Chontal	882418	183228	11	1	*	*	*	*	*	*	*	*	*	*	*	*	*	*	*	*	*	*	*	*	*	*	*	*	*	*	*	*	*	*	*	*	*	*	*	*	*	*	*	*
23	Quintana Roo	4	Othón P. Blanco	1335	Los Cítricos	882759	183146	27	1	*	*	*	*	*	*	*	*	*	*	*	*	*	*	*	*	*	*	*	*	*	*	*	*	*	*	*	*	*	*	*	*	*	*	*	*	*	*	*	*
23	Quintana Roo	4	Othón P. Blanco	1337	La Soledad	884915	181958	52	1	*	*	*	*	*	*	*	*	*	*	*	*	*	*	*	*	*	*	*	*	*	*	*	*	*	*	*	*	*	*	*	*	*	*	*	*	*	*	*	*
23	Quintana Roo	4	Othón P. Blanco	1348	La Cristiandad (Kilómetro Ochenta y Cuatro)	885237	175514	21	3	*	*	*	*	*	*	*	*	*	*	*	*	*	*	*	*	*	*	*	*	*	*	*	*	*	*	*	*	*	*	*	*	*	*	*	*	*	*	*	*
23	Quintana Roo	4	Othón P. Blanco	1350	Cuatro Reales	882555	183146	10	3	*	*	*	*	*	*	*	*	*	*	*	*	*	*	*	*	*	*	*	*	*	*	*	*	*	*	*	*	*	*	*	*	*	*	*	*	*	*	*	*
23	Quintana Roo	4	Othón P. Blanco	1357	Don Caldo	881622	183342	10	1	*	*	*	*	*	*	*	*	*	*	*	*	*	*	*	*	*	*	*	*	*	*	*	*	*	*	*	*	*	*	*	*	*	*	*	*	*	*	*	*
23	Quintana Roo	4	Othón P. Blanco	1359	El Dorado (Guamúchil)	881748	183920	9	2	*	*	*	*	*	*	*	*	*	*	*	*	*	*	*	*	*	*	*	*	*	*	*	*	*	*	*	*	*	*	*	*	*	*	*	*	*	*	*	*
23	Quintana Roo	4	Othón P. Blanco	1363	Tres Reyes	883312	183204	28	8	*	*	*	*	*	*	*	*	*	*	*	*	*	*	*	*	*	*	*	*	*	*	*	*	*	*	*	*	*	*	*	*	*	*	*	*	*	*	*	*
23	Quintana Roo	4	Othón P. Blanco	1376	Ernesto Chejín	882356	184234	28	3	*	*	*	*	*	*	*	*	*	*	*	*	*	*	*	*	*	*	*	*	*	*	*	*	*	*	*	*	*	*	*	*	*	*	*	*	*	*	*	*
23	Quintana Roo	4	Othón P. Blanco	1384	Javier Esparza	884006	181653	40	1	*	*	*	*	*	*	*	*	*	*	*	*	*	*	*	*	*	*	*	*	*	*	*	*	*	*	*	*	*	*	*	*	*	*	*	*	*	*	*	*
23	Quintana Roo	4	Othón P. Blanco	1385	El Espejo	882802	183230	23	5	*	*	*	*	*	*	*	*	*	*	*	*	*	*	*	*	*	*	*	*	*	*	*	*	*	*	*	*	*	*	*	*	*	*	*	*	*	*	*	*
23	Quintana Roo	4	Othón P. Blanco	1386	Las Ilusiones	890347	190031	70	3	*	*	*	*	*	*	*	*	*	*	*	*	*	*	*	*	*	*	*	*	*	*	*	*	*	*	*	*	*	*	*	*	*	*	*	*	*	*	*	*
23	Quintana Roo	4	Othón P. Blanco	1387	Bennys	881521	183656	10	4	*	*	*	*	*	*	*	*	*	*	*	*	*	*	*	*	*	*	*	*	*	*	*	*	*	*	*	*	*	*	*	*	*	*	*	*	*	*	*	*
23	Quintana Roo	4	Othón P. Blanco	1389	Ninguno [Estación de Microondas]	885926	182722	160	1	*	*	*	*	*	*	*	*	*	*	*	*	*	*	*	*	*	*	*	*	*	*	*	*	*	*	*	*	*	*	*	*	*	*	*	*	*	*	*	*
23	Quintana Roo	4	Othón P. Blanco	1390	Veintidós de Octubre	885817	183257	101	1	*	*	*	*	*	*	*	*	*	*	*	*	*	*	*	*	*	*	*	*	*	*	*	*	*	*	*	*	*	*	*	*	*	*	*	*	*	*	*	*
23	Quintana Roo	4	Othón P. Blanco	1393	El Redomón	882105	183121	10	2	*	*	*	*	*	*	*	*	*	*	*	*	*	*	*	*	*	*	*	*	*	*	*	*	*	*	*	*	*	*	*	*	*	*	*	*	*	*	*	*
23	Quintana Roo	4	Othón P. Blanco	1394	Felipe Carrillo Puerto	881527	183525	10	2	*	*	*	*	*	*	*	*	*	*	*	*	*	*	*	*	*	*	*	*	*	*	*	*	*	*	*	*	*	*	*	*	*	*	*	*	*	*	*	*
23	Quintana Roo	4	Othón P. Blanco	1401	El Crucero	883905	181451	48	10	6	4	1	1	0	9	5	4	8	4	4	5	3	2	5	3	2	5	3	2	1	1	0	3	1	2	1	1	0	0	0	0	0	0	0	0	0	0	2	1
23	Quintana Roo	4	Othón P. Blanco	1407	San Cipriano	881539	183632	10	5	*	*	*	*	*	*	*	*	*	*	*	*	*	*	*	*	*	*	*	*	*	*	*	*	*	*	*	*	*	*	*	*	*	*	*	*	*	*	*	*
23	Quintana Roo	4	Othón P. Blanco	1409	Gilberto Carrillo	881529	184200	8	1	*	*	*	*	*	*	*	*	*	*	*	*	*	*	*	*	*	*	*	*	*	*	*	*	*	*	*	*	*	*	*	*	*	*	*	*	*	*	*	*
23	Quintana Roo	4	Othón P. Blanco	1411	El Imán	885717	183552	118	2	*	*	*	*	*	*	*	*	*	*	*	*	*	*	*	*	*	*	*	*	*	*	*	*	*	*	*	*	*	*	*	*	*	*	*	*	*	*	*	*
23	Quintana Roo	4	Othón P. Blanco	1419	El Gavilán	882409	183228	12	1	*	*	*	*	*	*	*	*	*	*	*	*	*	*	*	*	*	*	*	*	*	*	*	*	*	*	*	*	*	*	*	*	*	*	*	*	*	*	*	*
23	Quintana Roo	4	Othón P. Blanco	1421	Los Gavilanes	882224	183007	10	2	*	*	*	*	*	*	*	*	*	*	*	*	*	*	*	*	*	*	*	*	*	*	*	*	*	*	*	*	*	*	*	*	*	*	*	*	*	*	*	*
23	Quintana Roo	4	Othón P. Blanco	1426	Graciano Balam Dzul	890110	182416	120	1	*	*	*	*	*	*	*	*	*	*	*	*	*	*	*	*	*	*	*	*	*	*	*	*	*	*	*	*	*	*	*	*	*	*	*	*	*	*	*	*
23	Quintana Roo	4	Othón P. Blanco	1435	Huay-Pix	882442	183253	10	3	*	*	*	*	*	*	*	*	*	*	*	*	*	*	*	*	*	*	*	*	*	*	*	*	*	*	*	*	*	*	*	*	*	*	*	*	*	*	*	*
23	Quintana Roo	4	Othón P. Blanco	1458	Alma Sol	874337	183912	1	2	*	*	*	*	*	*	*	*	*	*	*	*	*	*	*	*	*	*	*	*	*	*	*	*	*	*	*	*	*	*	*	*	*	*	*	*	*	*	*	*
23	Quintana Roo	4	Othón P. Blanco	1460	San Francisco (Javier Pérez Quintal)	874331	184008	1	1	*	*	*	*	*	*	*	*	*	*	*	*	*	*	*	*	*	*	*	*	*	*	*	*	*	*	*	*	*	*	*	*	*	*	*	*	*	*	*	*
23	Quintana Roo	4	Othón P. Blanco	1470	Los Laureles	884519	184603	100	3	*	*	*	*	*	*	*	*	*	*	*	*	*	*	*	*	*	*	*	*	*	*	*	*	*	*	*	*	*	*	*	*	*	*	*	*	*	*	*	*
23	Quintana Roo	4	Othón P. Blanco	1471	La Central	883615	184910	30	1	*	*	*	*	*	*	*	*	*	*	*	*	*	*	*	*	*	*	*	*	*	*	*	*	*	*	*	*	*	*	*	*	*	*	*	*	*	*	*	*
23	Quintana Roo	4	Othón P. Blanco	1472	Narciso Alpuche Rivero	881838	184619	12	1	*	*	*	*	*	*	*	*	*	*	*	*	*	*	*	*	*	*	*	*	*	*	*	*	*	*	*	*	*	*	*	*	*	*	*	*	*	*	*	*
23	Quintana Roo	4	Othón P. Blanco	1478	Frontera de los Julios	882440	183913	14	1	*	*	*	*	*	*	*	*	*	*	*	*	*	*	*	*	*	*	*	*	*	*	*	*	*	*	*	*	*	*	*	*	*	*	*	*	*	*	*	*
23	Quintana Roo	4	Othón P. Blanco	1486	Las Flores de Guadalupe	881534	183506	10	2	*	*	*	*	*	*	*	*	*	*	*	*	*	*	*	*	*	*	*	*	*	*	*	*	*	*	*	*	*	*	*	*	*	*	*	*	*	*	*	*
23	Quintana Roo	4	Othón P. Blanco	1493	Las Carmelitas	882349	183103	10	9	3	6	0	0	0	9	3	6	8	3	5	5	2	3	5	2	3	5	2	3	2	0	2	2	1	1	1	1	0	0	0	0	0	0	0	0	0	0	2	0
23	Quintana Roo	4	Othón P. Blanco	1502	Villamil	882349	183534	10	1	*	*	*	*	*	*	*	*	*	*	*	*	*	*	*	*	*	*	*	*	*	*	*	*	*	*	*	*	*	*	*	*	*	*	*	*	*	*	*	*
23	Quintana Roo	4	Othón P. Blanco	1509	San José	881654	183404	10	7	*	*	*	*	*	*	*	*	*	*	*	*	*	*	*	*	*	*	*	*	*	*	*	*	*	*	*	*	*	*	*	*	*	*	*	*	*	*	*	*
23	Quintana Roo	4	Othón P. Blanco	1521	El Jarocho	881907	184147	9	10	*	*	*	*	*	*	*	*	*	*	*	*	*	*	*	*	*	*	*	*	*	*	*	*	*	*	*	*	*	*	*	*	*	*	*	*	*	*	*	*
23	Quintana Roo	4	Othón P. Blanco	1523	Jeremías Córdova Domínguez	883647	182003	26	1	*	*	*	*	*	*	*	*	*	*	*	*	*	*	*	*	*	*	*	*	*	*	*	*	*	*	*	*	*	*	*	*	*	*	*	*	*	*	*	*
23	Quintana Roo	4	Othón P. Blanco	1525	La Fogata	884226	181023	65	11	*	*	*	*	*	*	*	*	*	*	*	*	*	*	*	*	*	*	*	*	*	*	*	*	*	*	*	*	*	*	*	*	*	*	*	*	*	*	*	*
23	Quintana Roo	4	Othón P. Blanco	1527	Carámicua	882816	183456	30	3	*	*	*	*	*	*	*	*	*	*	*	*	*	*	*	*	*	*	*	*	*	*	*	*	*	*	*	*	*	*	*	*	*	*	*	*	*	*	*	*
23	Quintana Roo	4	Othón P. Blanco	1533	Jorge Navarrete (Leydi)	881356	184918	10	2	*	*	*	*	*	*	*	*	*	*	*	*	*	*	*	*	*	*	*	*	*	*	*	*	*	*	*	*	*	*	*	*	*	*	*	*	*	*	*	*
23	Quintana Roo	4	Othón P. Blanco	1538	El Encanto	874336	183916	1	3	*	*	*	*	*	*	*	*	*	*	*	*	*	*	*	*	*	*	*	*	*	*	*	*	*	*	*	*	*	*	*	*	*	*	*	*	*	*	*	*
23	Quintana Roo	4	Othón P. Blanco	1545	Juan Herrera	882117	184440	28	1	*	*	*	*	*	*	*	*	*	*	*	*	*	*	*	*	*	*	*	*	*	*	*	*	*	*	*	*	*	*	*	*	*	*	*	*	*	*	*	*
23	Quintana Roo	4	Othón P. Blanco	1550	Silvia Cerecero Loyola	882248	184248	11	3	*	*	*	*	*	*	*	*	*	*	*	*	*	*	*	*	*	*	*	*	*	*	*	*	*	*	*	*	*	*	*	*	*	*	*	*	*	*	*	*
23	Quintana Roo	4	Othón P. Blanco	1552	Paso María	882952	183223	29	8	*	*	*	*	*	*	*	*	*	*	*	*	*	*	*	*	*	*	*	*	*	*	*	*	*	*	*	*	*	*	*	*	*	*	*	*	*	*	*	*
23	Quintana Roo	4	Othón P. Blanco	1555	Rancho Juanita	882126	184338	18	1	*	*	*	*	*	*	*	*	*	*	*	*	*	*	*	*	*	*	*	*	*	*	*	*	*	*	*	*	*	*	*	*	*	*	*	*	*	*	*	*
23	Quintana Roo	4	Othón P. Blanco	1557	Zak-Chakán	880856	185721	10	2	*	*	*	*	*	*	*	*	*	*	*	*	*	*	*	*	*	*	*	*	*	*	*	*	*	*	*	*	*	*	*	*	*	*	*	*	*	*	*	*
23	Quintana Roo	4	Othón P. Blanco	1562	La Guadalupana	881457	183732	10	5	*	*	*	*	*	*	*	*	*	*	*	*	*	*	*	*	*	*	*	*	*	*	*	*	*	*	*	*	*	*	*	*	*	*	*	*	*	*	*	*
23	Quintana Roo	4	Othón P. Blanco	1570	Chatis	881314	183703	4	1	*	*	*	*	*	*	*	*	*	*	*	*	*	*	*	*	*	*	*	*	*	*	*	*	*	*	*	*	*	*	*	*	*	*	*	*	*	*	*	*
23	Quintana Roo	4	Othón P. Blanco	1590	San Juan	883158	183216	33	1	*	*	*	*	*	*	*	*	*	*	*	*	*	*	*	*	*	*	*	*	*	*	*	*	*	*	*	*	*	*	*	*	*	*	*	*	*	*	*	*
23	Quintana Roo	4	Othón P. Blanco	1592	Máximo Canul	882922	183418	49	3	*	*	*	*	*	*	*	*	*	*	*	*	*	*	*	*	*	*	*	*	*	*	*	*	*	*	*	*	*	*	*	*	*	*	*	*	*	*	*	*
23	Quintana Roo	4	Othón P. Blanco	1602	Miguel López Domínguez	884705	183520	70	2	*	*	*	*	*	*	*	*	*	*	*	*	*	*	*	*	*	*	*	*	*	*	*	*	*	*	*	*	*	*	*	*	*	*	*	*	*	*	*	*
23	Quintana Roo	4	Othón P. Blanco	1607	Monasterio de Nuestra Señora de Guadalupe	882103	183027	10	37	*	*	*	*	*	*	*	*	*	*	*	*	*	*	*	*	*	*	*	*	*	*	*	*	*	*	*	*	*	*	*	*	*	*	*	*	*	*	*	*
23	Quintana Roo	4	Othón P. Blanco	1609	El Naranjal	882744	183123	21	13	5	8	0	0	0	13	5	8	13	5	8	8	4	4	8	4	4	6	3	3	1	0	1	4	1	3	3	1	2	0	0	0	2	1	1	0	0	0	3	0
23	Quintana Roo	4	Othón P. Blanco	1614	Nueva Vida	881606	183251	11	4	*	*	*	*	*	*	*	*	*	*	*	*	*	*	*	*	*	*	*	*	*	*	*	*	*	*	*	*	*	*	*	*	*	*	*	*	*	*	*	*
23	Quintana Roo	4	Othón P. Blanco	1619	Pablo Loza Flores	882350	183314	19	2	*	*	*	*	*	*	*	*	*	*	*	*	*	*	*	*	*	*	*	*	*	*	*	*	*	*	*	*	*	*	*	*	*	*	*	*	*	*	*	*
23	Quintana Roo	4	Othón P. Blanco	1628	Papalipa	884857	185824	94	1	*	*	*	*	*	*	*	*	*	*	*	*	*	*	*	*	*	*	*	*	*	*	*	*	*	*	*	*	*	*	*	*	*	*	*	*	*	*	*	*
23	Quintana Roo	4	Othón P. Blanco	1633	Paraíso Segundo	882635	184353	30	1	*	*	*	*	*	*	*	*	*	*	*	*	*	*	*	*	*	*	*	*	*	*	*	*	*	*	*	*	*	*	*	*	*	*	*	*	*	*	*	*
23	Quintana Roo	4	Othón P. Blanco	1636	San José	882057	183152	10	5	*	*	*	*	*	*	*	*	*	*	*	*	*	*	*	*	*	*	*	*	*	*	*	*	*	*	*	*	*	*	*	*	*	*	*	*	*	*	*	*
23	Quintana Roo	4	Othón P. Blanco	1640	La Pasadita	881401	185337	15	2	*	*	*	*	*	*	*	*	*	*	*	*	*	*	*	*	*	*	*	*	*	*	*	*	*	*	*	*	*	*	*	*	*	*	*	*	*	*	*	*
23	Quintana Roo	4	Othón P. Blanco	1641	La Pasadita	890544	182809	129	4	*	*	*	*	*	*	*	*	*	*	*	*	*	*	*	*	*	*	*	*	*	*	*	*	*	*	*	*	*	*	*	*	*	*	*	*	*	*	*	*
23	Quintana Roo	4	Othón P. Blanco	1642	Patricio	883955	182911	49	5	*	*	*	*	*	*	*	*	*	*	*	*	*	*	*	*	*	*	*	*	*	*	*	*	*	*	*	*	*	*	*	*	*	*	*	*	*	*	*	*
23	Quintana Roo	4	Othón P. Blanco	1644	Las Tres P (Paulino Ponce Parra)	874507	184042	9	5	*	*	*	*	*	*	*	*	*	*	*	*	*	*	*	*	*	*	*	*	*	*	*	*	*	*	*	*	*	*	*	*	*	*	*	*	*	*	*	*
23	Quintana Roo	4	Othón P. Blanco	1649	Martín Haro	882719	183647	20	3	*	*	*	*	*	*	*	*	*	*	*	*	*	*	*	*	*	*	*	*	*	*	*	*	*	*	*	*	*	*	*	*	*	*	*	*	*	*	*	*
23	Quintana Roo	4	Othón P. Blanco	1653	Pehaltum	882219	184315	20	5	*	*	*	*	*	*	*	*	*	*	*	*	*	*	*	*	*	*	*	*	*	*	*	*	*	*	*	*	*	*	*	*	*	*	*	*	*	*	*	*
23	Quintana Roo	4	Othón P. Blanco	1655	Pino Suárez	882435	183224	10	1	*	*	*	*	*	*	*	*	*	*	*	*	*	*	*	*	*	*	*	*	*	*	*	*	*	*	*	*	*	*	*	*	*	*	*	*	*	*	*	*
23	Quintana Roo	4	Othón P. Blanco	1666	Grano de Oro	884043	181207	41	11	*	*	*	*	*	*	*	*	*	*	*	*	*	*	*	*	*	*	*	*	*	*	*	*	*	*	*	*	*	*	*	*	*	*	*	*	*	*	*	*
23	Quintana Roo	4	Othón P. Blanco	1671	Puerta del Cielo	882307	184214	10	3	*	*	*	*	*	*	*	*	*	*	*	*	*	*	*	*	*	*	*	*	*	*	*	*	*	*	*	*	*	*	*	*	*	*	*	*	*	*	*	*
23	Quintana Roo	4	Othón P. Blanco	1673	Punta Estrella	881551	183330	10	5	*	*	*	*	*	*	*	*	*	*	*	*	*	*	*	*	*	*	*	*	*	*	*	*	*	*	*	*	*	*	*	*	*	*	*	*	*	*	*	*
23	Quintana Roo	4	Othón P. Blanco	1674	Punta Pulticub	873351	190400	0	37	22	15	5	2	3	32	20	12	30	19	11	28	19	9	27	18	9	23	17	6	3	1	2	1	0	1	1	1	0	1	1	0	4	1	3	6	3	3	8	4
23	Quintana Roo	4	Othón P. Blanco	1675	Punta Tam	874256	184139	1	19	9	10	1	0	1	18	9	9	17	8	9	15	8	7	15	8	7	14	7	7	1	1	0	2	0	2	1	0	1	0	0	0	1	1	0	2	1	1	5	1
23	Quintana Roo	4	Othón P. Blanco	1678	Rancho Elizabeth	874136	184557	1	1	*	*	*	*	*	*	*	*	*	*	*	*	*	*	*	*	*	*	*	*	*	*	*	*	*	*	*	*	*	*	*	*	*	*	*	*	*	*	*	*
23	Quintana Roo	4	Othón P. Blanco	1681	Ramón García Gómez	890545	182812	131	2	*	*	*	*	*	*	*	*	*	*	*	*	*	*	*	*	*	*	*	*	*	*	*	*	*	*	*	*	*	*	*	*	*	*	*	*	*	*	*	*
23	Quintana Roo	4	Othón P. Blanco	1692	Rancho Gabriela	874338	183909	1	2	*	*	*	*	*	*	*	*	*	*	*	*	*	*	*	*	*	*	*	*	*	*	*	*	*	*	*	*	*	*	*	*	*	*	*	*	*	*	*	*
23	Quintana Roo	4	Othón P. Blanco	1701	Los Reyes	883755	183143	39	6	*	*	*	*	*	*	*	*	*	*	*	*	*	*	*	*	*	*	*	*	*	*	*	*	*	*	*	*	*	*	*	*	*	*	*	*	*	*	*	*
23	Quintana Roo	4	Othón P. Blanco	1706	El Roble	882520	190047	23	3	*	*	*	*	*	*	*	*	*	*	*	*	*	*	*	*	*	*	*	*	*	*	*	*	*	*	*	*	*	*	*	*	*	*	*	*	*	*	*	*
23	Quintana Roo	4	Othón P. Blanco	1707	El Roble	890601	182700	130	2	*	*	*	*	*	*	*	*	*	*	*	*	*	*	*	*	*	*	*	*	*	*	*	*	*	*	*	*	*	*	*	*	*	*	*	*	*	*	*	*
23	Quintana Roo	4	Othón P. Blanco	1712	Santa Rosa (La Aguada)	875127	181620	8	1	*	*	*	*	*	*	*	*	*	*	*	*	*	*	*	*	*	*	*	*	*	*	*	*	*	*	*	*	*	*	*	*	*	*	*	*	*	*	*	*
23	Quintana Roo	4	Othón P. Blanco	1715	El Rubí	882539	190246	25	4	*	*	*	*	*	*	*	*	*	*	*	*	*	*	*	*	*	*	*	*	*	*	*	*	*	*	*	*	*	*	*	*	*	*	*	*	*	*	*	*
23	Quintana Roo	4	Othón P. Blanco	1720	San Antonio	875036	181209	0	1	*	*	*	*	*	*	*	*	*	*	*	*	*	*	*	*	*	*	*	*	*	*	*	*	*	*	*	*	*	*	*	*	*	*	*	*	*	*	*	*
23	Quintana Roo	4	Othón P. Blanco	1727	San Cristobal	881545	183342	10	8	*	*	*	*	*	*	*	*	*	*	*	*	*	*	*	*	*	*	*	*	*	*	*	*	*	*	*	*	*	*	*	*	*	*	*	*	*	*	*	*
23	Quintana Roo	4	Othón P. Blanco	1729	San Cristobal Dos	881541	183350	10	15	9	6	1	1	0	14	8	6	13	7	6	13	7	6	13	7	6	12	6	6	1	1	0	0	0	0	0	0	0	0	0	0	1	1	0	3	2	1	5	3
23	Quintana Roo	4	Othón P. Blanco	1738	San Jerónimo	874243	184520	1	5	*	*	*	*	*	*	*	*	*	*	*	*	*	*	*	*	*	*	*	*	*	*	*	*	*	*	*	*	*	*	*	*	*	*	*	*	*	*	*	*
23	Quintana Roo	4	Othón P. Blanco	1744	San Manuel	882346	183109	10	3	*	*	*	*	*	*	*	*	*	*	*	*	*	*	*	*	*	*	*	*	*	*	*	*	*	*	*	*	*	*	*	*	*	*	*	*	*	*	*	*
23	Quintana Roo	4	Othón P. Blanco	1745	San Martín	881539	183431	10	5	*	*	*	*	*	*	*	*	*	*	*	*	*	*	*	*	*	*	*	*	*	*	*	*	*	*	*	*	*	*	*	*	*	*	*	*	*	*	*	*
23	Quintana Roo	4	Othón P. Blanco	1751	Sandwood Villas	874843	182033	1	4	*	*	*	*	*	*	*	*	*	*	*	*	*	*	*	*	*	*	*	*	*	*	*	*	*	*	*	*	*	*	*	*	*	*	*	*	*	*	*	*
23	Quintana Roo	4	Othón P. Blanco	1757	Santa Lucía	881547	183756	10	9	*	*	*	*	*	*	*	*	*	*	*	*	*	*	*	*	*	*	*	*	*	*	*	*	*	*	*	*	*	*	*	*	*	*	*	*	*	*	*	*
23	Quintana Roo	4	Othón P. Blanco	1761	Los Cocos	881734	183841	10	3	*	*	*	*	*	*	*	*	*	*	*	*	*	*	*	*	*	*	*	*	*	*	*	*	*	*	*	*	*	*	*	*	*	*	*	*	*	*	*	*
23	Quintana Roo	4	Othón P. Blanco	1763	Santo Niño	883938	182922	39	9	*	*	*	*	*	*	*	*	*	*	*	*	*	*	*	*	*	*	*	*	*	*	*	*	*	*	*	*	*	*	*	*	*	*	*	*	*	*	*	*
23	Quintana Roo	4	Othón P. Blanco	1765	Grupo Laguna	883241	183003	24	2	*	*	*	*	*	*	*	*	*	*	*	*	*	*	*	*	*	*	*	*	*	*	*	*	*	*	*	*	*	*	*	*	*	*	*	*	*	*	*	*
23	Quintana Roo	4	Othón P. Blanco	1766	Serviliano Cohuó Medina	881346	190005	10	5	*	*	*	*	*	*	*	*	*	*	*	*	*	*	*	*	*	*	*	*	*	*	*	*	*	*	*	*	*	*	*	*	*	*	*	*	*	*	*	*
23	Quintana Roo	4	Othón P. Blanco	1771	El Tamarindo	881540	183419	10	4	*	*	*	*	*	*	*	*	*	*	*	*	*	*	*	*	*	*	*	*	*	*	*	*	*	*	*	*	*	*	*	*	*	*	*	*	*	*	*	*
23	Quintana Roo	4	Othón P. Blanco	1792	Villa Conny	882741	183232	13	5	*	*	*	*	*	*	*	*	*	*	*	*	*	*	*	*	*	*	*	*	*	*	*	*	*	*	*	*	*	*	*	*	*	*	*	*	*	*	*	*
23	Quintana Roo	4	Othón P. Blanco	1795	Wesby	881646	183808	10	7	*	*	*	*	*	*	*	*	*	*	*	*	*	*	*	*	*	*	*	*	*	*	*	*	*	*	*	*	*	*	*	*	*	*	*	*	*	*	*	*
23	Quintana Roo	4	Othón P. Blanco	1796	Zapata	882312	184211	17	7	*	*	*	*	*	*	*	*	*	*	*	*	*	*	*	*	*	*	*	*	*	*	*	*	*	*	*	*	*	*	*	*	*	*	*	*	*	*	*	*
23	Quintana Roo	4	Othón P. Blanco	1797	El Frutalito	882423	183937	20	8	*	*	*	*	*	*	*	*	*	*	*	*	*	*	*	*	*	*	*	*	*	*	*	*	*	*	*	*	*	*	*	*	*	*	*	*	*	*	*	*
23	Quintana Roo	4	Othón P. Blanco	1805	Emiliano Pantín Góngora	882312	184159	14	1	*	*	*	*	*	*	*	*	*	*	*	*	*	*	*	*	*	*	*	*	*	*	*	*	*	*	*	*	*	*	*	*	*	*	*	*	*	*	*	*
23	Quintana Roo	4	Othón P. Blanco	1806	San Enrique	882032	183134	10	2	*	*	*	*	*	*	*	*	*	*	*	*	*	*	*	*	*	*	*	*	*	*	*	*	*	*	*	*	*	*	*	*	*	*	*	*	*	*	*	*
23	Quintana Roo	4	Othón P. Blanco	1821	Paraíso	882039	183124	10	8	5	3	0	0	0	8	5	3	8	5	3	7	4	3	7	4	3	7	4	3	0	0	0	1	1	0	1	1	0	0	0	0	0	0	0	0	0	0	2	2
23	Quintana Roo	4	Othón P. Blanco	1836	Altamira	890456	184413	90	4	*	*	*	*	*	*	*	*	*	*	*	*	*	*	*	*	*	*	*	*	*	*	*	*	*	*	*	*	*	*	*	*	*	*	*	*	*	*	*	*
23	Quintana Roo	4	Othón P. Blanco	1839	Cristian Chávez	882449	183859	20	1	*	*	*	*	*	*	*	*	*	*	*	*	*	*	*	*	*	*	*	*	*	*	*	*	*	*	*	*	*	*	*	*	*	*	*	*	*	*	*	*
23	Quintana Roo	4	Othón P. Blanco	1855	San Carlos	884033	181626	44	5	*	*	*	*	*	*	*	*	*	*	*	*	*	*	*	*	*	*	*	*	*	*	*	*	*	*	*	*	*	*	*	*	*	*	*	*	*	*	*	*
23	Quintana Roo	4	Othón P. Blanco	1856	Hermanos Guzmán	881604	183259	11	2	*	*	*	*	*	*	*	*	*	*	*	*	*	*	*	*	*	*	*	*	*	*	*	*	*	*	*	*	*	*	*	*	*	*	*	*	*	*	*	*
23	Quintana Roo	4	Othón P. Blanco	1859	Melchor	881501	184817	10	1	*	*	*	*	*	*	*	*	*	*	*	*	*	*	*	*	*	*	*	*	*	*	*	*	*	*	*	*	*	*	*	*	*	*	*	*	*	*	*	*
23	Quintana Roo	4	Othón P. Blanco	1865	Tres Hermanos	882305	182941	10	1	*	*	*	*	*	*	*	*	*	*	*	*	*	*	*	*	*	*	*	*	*	*	*	*	*	*	*	*	*	*	*	*	*	*	*	*	*	*	*	*
23	Quintana Roo	4	Othón P. Blanco	1869	Javier Palacios	882311	184206	12	1	*	*	*	*	*	*	*	*	*	*	*	*	*	*	*	*	*	*	*	*	*	*	*	*	*	*	*	*	*	*	*	*	*	*	*	*	*	*	*	*
23	Quintana Roo	4	Othón P. Blanco	1873	Juan Sarabia	883047	183031	22	41	21	20	3	2	1	38	19	19	35	18	17	29	14	15	25	12	13	22	10	12	4	2	2	5	3	2	9	5	4	4	2	2	3	2	1	2	0	2	10	3
23	Quintana Roo	4	Othón P. Blanco	1877	Gerardo	883008	183433	47	3	*	*	*	*	*	*	*	*	*	*	*	*	*	*	*	*	*	*	*	*	*	*	*	*	*	*	*	*	*	*	*	*	*	*	*	*	*	*	*	*
23	Quintana Roo	4	Othón P. Blanco	1888	El Pedregal	880753	190152	16	18	9	9	1	0	1	17	9	8	17	9	8	13	6	7	12	6	6	10	5	5	1	1	0	3	2	1	3	2	1	1	0	1	2	1	1	0	0	0	4	2
23	Quintana Roo	4	Othón P. Blanco	1891	La Esperanza	874835	185056	7	2	*	*	*	*	*	*	*	*	*	*	*	*	*	*	*	*	*	*	*	*	*	*	*	*	*	*	*	*	*	*	*	*	*	*	*	*	*	*	*	*
23	Quintana Roo	4	Othón P. Blanco	1892	Rancho Escondido	874025	184845	2	2	*	*	*	*	*	*	*	*	*	*	*	*	*	*	*	*	*	*	*	*	*	*	*	*	*	*	*	*	*	*	*	*	*	*	*	*	*	*	*	*
23	Quintana Roo	4	Othón P. Blanco	1896	Rosa de Saarón	890456	185458	89	1	*	*	*	*	*	*	*	*	*	*	*	*	*	*	*	*	*	*	*	*	*	*	*	*	*	*	*	*	*	*	*	*	*	*	*	*	*	*	*	*
23	Quintana Roo	4	Othón P. Blanco	1906	Unión de Guadalupe	884035	181637	60	7	*	*	*	*	*	*	*	*	*	*	*	*	*	*	*	*	*	*	*	*	*	*	*	*	*	*	*	*	*	*	*	*	*	*	*	*	*	*	*	*
23	Quintana Roo	4	Othón P. Blanco	1919	La Cueva del Negro	881331	183645	8	6	*	*	*	*	*	*	*	*	*	*	*	*	*	*	*	*	*	*	*	*	*	*	*	*	*	*	*	*	*	*	*	*	*	*	*	*	*	*	*	*
23	Quintana Roo	4	Othón P. Blanco	1930	Bernarda Montalvo	881602	183137	8	1	*	*	*	*	*	*	*	*	*	*	*	*	*	*	*	*	*	*	*	*	*	*	*	*	*	*	*	*	*	*	*	*	*	*	*	*	*	*	*	*
23	Quintana Roo	4	Othón P. Blanco	1931	Los Martínez	881551	183732	10	1	*	*	*	*	*	*	*	*	*	*	*	*	*	*	*	*	*	*	*	*	*	*	*	*	*	*	*	*	*	*	*	*	*	*	*	*	*	*	*	*
23	Quintana Roo	4	Othón P. Blanco	1940	Los Cinco Hermanos	880404	185839	10	2	*	*	*	*	*	*	*	*	*	*	*	*	*	*	*	*	*	*	*	*	*	*	*	*	*	*	*	*	*	*	*	*	*	*	*	*	*	*	*	*
23	Quintana Roo	4	Othón P. Blanco	1942	El Ciruelo	882249	183033	10	8	*	*	*	*	*	*	*	*	*	*	*	*	*	*	*	*	*	*	*	*	*	*	*	*	*	*	*	*	*	*	*	*	*	*	*	*	*	*	*	*
23	Quintana Roo	4	Othón P. Blanco	1946	El Corozo	883446	183253	39	1	*	*	*	*	*	*	*	*	*	*	*	*	*	*	*	*	*	*	*	*	*	*	*	*	*	*	*	*	*	*	*	*	*	*	*	*	*	*	*	*
23	Quintana Roo	4	Othón P. Blanco	1948	El Coyol	883945	182852	50	2	*	*	*	*	*	*	*	*	*	*	*	*	*	*	*	*	*	*	*	*	*	*	*	*	*	*	*	*	*	*	*	*	*	*	*	*	*	*	*	*
23	Quintana Roo	4	Othón P. Blanco	1949	Las Cruces	884026	181620	40	1	*	*	*	*	*	*	*	*	*	*	*	*	*	*	*	*	*	*	*	*	*	*	*	*	*	*	*	*	*	*	*	*	*	*	*	*	*	*	*	*
23	Quintana Roo	4	Othón P. Blanco	1953	El Barón [Deshuesadero]	882140	183049	10	4	*	*	*	*	*	*	*	*	*	*	*	*	*	*	*	*	*	*	*	*	*	*	*	*	*	*	*	*	*	*	*	*	*	*	*	*	*	*	*	*
23	Quintana Roo	4	Othón P. Blanco	1963	El Cedral	881556	183838	10	1	*	*	*	*	*	*	*	*	*	*	*	*	*	*	*	*	*	*	*	*	*	*	*	*	*	*	*	*	*	*	*	*	*	*	*	*	*	*	*	*
23	Quintana Roo	4	Othón P. Blanco	1973	La Guadalupana	881554	183932	10	1	*	*	*	*	*	*	*	*	*	*	*	*	*	*	*	*	*	*	*	*	*	*	*	*	*	*	*	*	*	*	*	*	*	*	*	*	*	*	*	*
23	Quintana Roo	4	Othón P. Blanco	1975	Guilbert Canto	882415	183318	14	1	*	*	*	*	*	*	*	*	*	*	*	*	*	*	*	*	*	*	*	*	*	*	*	*	*	*	*	*	*	*	*	*	*	*	*	*	*	*	*	*
23	Quintana Roo	4	Othón P. Blanco	1981	Las Heliconias	882503	190118	24	3	*	*	*	*	*	*	*	*	*	*	*	*	*	*	*	*	*	*	*	*	*	*	*	*	*	*	*	*	*	*	*	*	*	*	*	*	*	*	*	*
23	Quintana Roo	4	Othón P. Blanco	1998	Ninguno	882903	183115	33	5	*	*	*	*	*	*	*	*	*	*	*	*	*	*	*	*	*	*	*	*	*	*	*	*	*	*	*	*	*	*	*	*	*	*	*	*	*	*	*	*
23	Quintana Roo	4	Othón P. Blanco	2006	Villa de Leyva	881409	183454	4	1	*	*	*	*	*	*	*	*	*	*	*	*	*	*	*	*	*	*	*	*	*	*	*	*	*	*	*	*	*	*	*	*	*	*	*	*	*	*	*	*
23	Quintana Roo	4	Othón P. Blanco	2015	El Paraíso	882923	183448	41	2	*	*	*	*	*	*	*	*	*	*	*	*	*	*	*	*	*	*	*	*	*	*	*	*	*	*	*	*	*	*	*	*	*	*	*	*	*	*	*	*
23	Quintana Roo	4	Othón P. Blanco	2017	José Jesús Aguilar Ovando	881736	184017	10	1	*	*	*	*	*	*	*	*	*	*	*	*	*	*	*	*	*	*	*	*	*	*	*	*	*	*	*	*	*	*	*	*	*	*	*	*	*	*	*	*
23	Quintana Roo	4	Othón P. Blanco	2021	Las Flores	882923	183449	41	1	*	*	*	*	*	*	*	*	*	*	*	*	*	*	*	*	*	*	*	*	*	*	*	*	*	*	*	*	*	*	*	*	*	*	*	*	*	*	*	*
23	Quintana Roo	4	Othón P. Blanco	2023	La Karlita	882159	183048	10	1	*	*	*	*	*	*	*	*	*	*	*	*	*	*	*	*	*	*	*	*	*	*	*	*	*	*	*	*	*	*	*	*	*	*	*	*	*	*	*	*
23	Quintana Roo	4	Othón P. Blanco	2025	Laureles	883337	184755	21	2	*	*	*	*	*	*	*	*	*	*	*	*	*	*	*	*	*	*	*	*	*	*	*	*	*	*	*	*	*	*	*	*	*	*	*	*	*	*	*	*
23	Quintana Roo	4	Othón P. Blanco	2033	El Manantial	884215	181049	55	2	*	*	*	*	*	*	*	*	*	*	*	*	*	*	*	*	*	*	*	*	*	*	*	*	*	*	*	*	*	*	*	*	*	*	*	*	*	*	*	*
23	Quintana Roo	4	Othón P. Blanco	2041	Mario Duck	881450	183351	0	1	*	*	*	*	*	*	*	*	*	*	*	*	*	*	*	*	*	*	*	*	*	*	*	*	*	*	*	*	*	*	*	*	*	*	*	*	*	*	*	*
23	Quintana Roo	4	Othón P. Blanco	2049	Mil Millas al Sur	883001	185655	30	5	*	*	*	*	*	*	*	*	*	*	*	*	*	*	*	*	*	*	*	*	*	*	*	*	*	*	*	*	*	*	*	*	*	*	*	*	*	*	*	*
23	Quintana Roo	4	Othón P. Blanco	2050	El Milagro del Siglo	881602	183804	10	12	*	*	*	*	*	*	*	*	*	*	*	*	*	*	*	*	*	*	*	*	*	*	*	*	*	*	*	*	*	*	*	*	*	*	*	*	*	*	*	*
23	Quintana Roo	4	Othón P. Blanco	2051	La Roca	881347	183811	10	1	*	*	*	*	*	*	*	*	*	*	*	*	*	*	*	*	*	*	*	*	*	*	*	*	*	*	*	*	*	*	*	*	*	*	*	*	*	*	*	*
23	Quintana Roo	4	Othón P. Blanco	2054	Los Nietos	882627	183052	10	2	*	*	*	*	*	*	*	*	*	*	*	*	*	*	*	*	*	*	*	*	*	*	*	*	*	*	*	*	*	*	*	*	*	*	*	*	*	*	*	*
23	Quintana Roo	4	Othón P. Blanco	2056	Oscar Lagos	882258	183024	10	1	*	*	*	*	*	*	*	*	*	*	*	*	*	*	*	*	*	*	*	*	*	*	*	*	*	*	*	*	*	*	*	*	*	*	*	*	*	*	*	*
23	Quintana Roo	4	Othón P. Blanco	2058	El Palmar	882431	183121	10	3	*	*	*	*	*	*	*	*	*	*	*	*	*	*	*	*	*	*	*	*	*	*	*	*	*	*	*	*	*	*	*	*	*	*	*	*	*	*	*	*
23	Quintana Roo	4	Othón P. Blanco	2060	El Paraíso Chico	881804	183516	10	1	*	*	*	*	*	*	*	*	*	*	*	*	*	*	*	*	*	*	*	*	*	*	*	*	*	*	*	*	*	*	*	*	*	*	*	*	*	*	*	*
23	Quintana Roo	4	Othón P. Blanco	2065	El Pedregal	883321	184716	20	8	*	*	*	*	*	*	*	*	*	*	*	*	*	*	*	*	*	*	*	*	*	*	*	*	*	*	*	*	*	*	*	*	*	*	*	*	*	*	*	*
23	Quintana Roo	4	Othón P. Blanco	2066	El Pedregal	881522	183558	10	3	*	*	*	*	*	*	*	*	*	*	*	*	*	*	*	*	*	*	*	*	*	*	*	*	*	*	*	*	*	*	*	*	*	*	*	*	*	*	*	*
23	Quintana Roo	4	Othón P. Blanco	2068	El Productor R	882751	183337	27	4	*	*	*	*	*	*	*	*	*	*	*	*	*	*	*	*	*	*	*	*	*	*	*	*	*	*	*	*	*	*	*	*	*	*	*	*	*	*	*	*
23	Quintana Roo	4	Othón P. Blanco	2069	El Progreso	883415	183329	50	1	*	*	*	*	*	*	*	*	*	*	*	*	*	*	*	*	*	*	*	*	*	*	*	*	*	*	*	*	*	*	*	*	*	*	*	*	*	*	*	*
23	Quintana Roo	4	Othón P. Blanco	2070	Las Pulgas Módulo Dos	883028	183555	50	4	*	*	*	*	*	*	*	*	*	*	*	*	*	*	*	*	*	*	*	*	*	*	*	*	*	*	*	*	*	*	*	*	*	*	*	*	*	*	*	*
23	Quintana Roo	4	Othón P. Blanco	2071	El Puma	883037	183436	52	5	*	*	*	*	*	*	*	*	*	*	*	*	*	*	*	*	*	*	*	*	*	*	*	*	*	*	*	*	*	*	*	*	*	*	*	*	*	*	*	*
23	Quintana Roo	4	Othón P. Blanco	2079	San Clemente	882432	183125	10	4	*	*	*	*	*	*	*	*	*	*	*	*	*	*	*	*	*	*	*	*	*	*	*	*	*	*	*	*	*	*	*	*	*	*	*	*	*	*	*	*
23	Quintana Roo	4	Othón P. Blanco	2081	El Negro	882438	183043	10	1	*	*	*	*	*	*	*	*	*	*	*	*	*	*	*	*	*	*	*	*	*	*	*	*	*	*	*	*	*	*	*	*	*	*	*	*	*	*	*	*
23	Quintana Roo	4	Othón P. Blanco	2086	El Búfalo	882804	183505	29	4	*	*	*	*	*	*	*	*	*	*	*	*	*	*	*	*	*	*	*	*	*	*	*	*	*	*	*	*	*	*	*	*	*	*	*	*	*	*	*	*
23	Quintana Roo	4	Othón P. Blanco	2087	San Antonio	883742	184850	35	2	*	*	*	*	*	*	*	*	*	*	*	*	*	*	*	*	*	*	*	*	*	*	*	*	*	*	*	*	*	*	*	*	*	*	*	*	*	*	*	*
23	Quintana Roo	4	Othón P. Blanco	2088	San Antonio	881804	183521	10	3	*	*	*	*	*	*	*	*	*	*	*	*	*	*	*	*	*	*	*	*	*	*	*	*	*	*	*	*	*	*	*	*	*	*	*	*	*	*	*	*
23	Quintana Roo	4	Othón P. Blanco	2089	San Antonio	882017	183239	10	1	*	*	*	*	*	*	*	*	*	*	*	*	*	*	*	*	*	*	*	*	*	*	*	*	*	*	*	*	*	*	*	*	*	*	*	*	*	*	*	*
23	Quintana Roo	4	Othón P. Blanco	2091	San Isidro Dos	882058	183104	10	6	*	*	*	*	*	*	*	*	*	*	*	*	*	*	*	*	*	*	*	*	*	*	*	*	*	*	*	*	*	*	*	*	*	*	*	*	*	*	*	*
23	Quintana Roo	4	Othón P. Blanco	2094	San Rafael	883911	182910	39	7	*	*	*	*	*	*	*	*	*	*	*	*	*	*	*	*	*	*	*	*	*	*	*	*	*	*	*	*	*	*	*	*	*	*	*	*	*	*	*	*
23	Quintana Roo	4	Othón P. Blanco	2096	Santa Fátima	881754	183326	13	1	*	*	*	*	*	*	*	*	*	*	*	*	*	*	*	*	*	*	*	*	*	*	*	*	*	*	*	*	*	*	*	*	*	*	*	*	*	*	*	*
23	Quintana Roo	4	Othón P. Blanco	2098	Santa Rosalía	882212	183056	10	1	*	*	*	*	*	*	*	*	*	*	*	*	*	*	*	*	*	*	*	*	*	*	*	*	*	*	*	*	*	*	*	*	*	*	*	*	*	*	*	*
23	Quintana Roo	4	Othón P. Blanco	2101	Sergio Vargas	882850	183335	30	4	*	*	*	*	*	*	*	*	*	*	*	*	*	*	*	*	*	*	*	*	*	*	*	*	*	*	*	*	*	*	*	*	*	*	*	*	*	*	*	*
23	Quintana Roo	4	Othón P. Blanco	2109	Los Tres Hermanos	882105	183118	10	1	*	*	*	*	*	*	*	*	*	*	*	*	*	*	*	*	*	*	*	*	*	*	*	*	*	*	*	*	*	*	*	*	*	*	*	*	*	*	*	*
23	Quintana Roo	4	Othón P. Blanco	2111	Unidad Veintisiete	883928	181904	27	7	*	*	*	*	*	*	*	*	*	*	*	*	*	*	*	*	*	*	*	*	*	*	*	*	*	*	*	*	*	*	*	*	*	*	*	*	*	*	*	*
23	Quintana Roo	4	Othón P. Blanco	2112	Valerio Chuayo Villamil	882904	183102	30	6	*	*	*	*	*	*	*	*	*	*	*	*	*	*	*	*	*	*	*	*	*	*	*	*	*	*	*	*	*	*	*	*	*	*	*	*	*	*	*	*
23	Quintana Roo	4	Othón P. Blanco	2121	Luna Floja (Alfonso Kayler)	874345	183807	1	3	*	*	*	*	*	*	*	*	*	*	*	*	*	*	*	*	*	*	*	*	*	*	*	*	*	*	*	*	*	*	*	*	*	*	*	*	*	*	*	*
23	Quintana Roo	4	Othón P. Blanco	2122	Ángelo Cortez	882541	183751	20	5	*	*	*	*	*	*	*	*	*	*	*	*	*	*	*	*	*	*	*	*	*	*	*	*	*	*	*	*	*	*	*	*	*	*	*	*	*	*	*	*
23	Quintana Roo	4	Othón P. Blanco	2123	Las Anonas	884314	183546	60	2	*	*	*	*	*	*	*	*	*	*	*	*	*	*	*	*	*	*	*	*	*	*	*	*	*	*	*	*	*	*	*	*	*	*	*	*	*	*	*	*
23	Quintana Roo	4	Othón P. Blanco	2127	Bárbara Guerrero Pérez	882313	184154	21	6	*	*	*	*	*	*	*	*	*	*	*	*	*	*	*	*	*	*	*	*	*	*	*	*	*	*	*	*	*	*	*	*	*	*	*	*	*	*	*	*
23	Quintana Roo	4	Othón P. Blanco	2132	Aventura Mahahual	874334	183919	0	3	*	*	*	*	*	*	*	*	*	*	*	*	*	*	*	*	*	*	*	*	*	*	*	*	*	*	*	*	*	*	*	*	*	*	*	*	*	*	*	*
23	Quintana Roo	4	Othón P. Blanco	2134	Cuatro Hermanos	890443	185643	90	11	*	*	*	*	*	*	*	*	*	*	*	*	*	*	*	*	*	*	*	*	*	*	*	*	*	*	*	*	*	*	*	*	*	*	*	*	*	*	*	*
23	Quintana Roo	4	Othón P. Blanco	2136	Ecotucán	882118	184353	21	2	*	*	*	*	*	*	*	*	*	*	*	*	*	*	*	*	*	*	*	*	*	*	*	*	*	*	*	*	*	*	*	*	*	*	*	*	*	*	*	*
23	Quintana Roo	4	Othón P. Blanco	2138	Chaparral	884803	183744	73	1	*	*	*	*	*	*	*	*	*	*	*	*	*	*	*	*	*	*	*	*	*	*	*	*	*	*	*	*	*	*	*	*	*	*	*	*	*	*	*	*
23	Quintana Roo	4	Othón P. Blanco	2139	Chula Vista	880703	185735	10	100	48	52	13	7	6	87	41	46	81	38	43	47	24	23	39	18	21	33	14	19	11	5	6	29	12	17	26	11	15	8	6	2	6	4	2	4	1	3	18	4
23	Quintana Roo	4	Othón P. Blanco	2141	La Divina Esperanza	874322	184258	8	16	10	6	3	3	0	13	7	6	12	7	5	12	7	5	12	7	5	12	7	5	1	0	1	0	0	0	0	0	0	0	0	0	0	0	0	3	1	2	4	1
23	Quintana Roo	4	Othón P. Blanco	2146	Explorean Costa Maya	874426	183347	1	1	*	*	*	*	*	*	*	*	*	*	*	*	*	*	*	*	*	*	*	*	*	*	*	*	*	*	*	*	*	*	*	*	*	*	*	*	*	*	*	*
23	Quintana Roo	4	Othón P. Blanco	2155	Hermanos R	884342	183320	60	1	*	*	*	*	*	*	*	*	*	*	*	*	*	*	*	*	*	*	*	*	*	*	*	*	*	*	*	*	*	*	*	*	*	*	*	*	*	*	*	*
23	Quintana Roo	4	Othón P. Blanco	2162	Pavón Angulo	874321	184035	1	1	*	*	*	*	*	*	*	*	*	*	*	*	*	*	*	*	*	*	*	*	*	*	*	*	*	*	*	*	*	*	*	*	*	*	*	*	*	*	*	*
23	Quintana Roo	4	Othón P. Blanco	2163	Kon Hun Beach	874334	184000	1	2	*	*	*	*	*	*	*	*	*	*	*	*	*	*	*	*	*	*	*	*	*	*	*	*	*	*	*	*	*	*	*	*	*	*	*	*	*	*	*	*
23	Quintana Roo	4	Othón P. Blanco	2165	Rancho Viviana	874338	183857	1	1	*	*	*	*	*	*	*	*	*	*	*	*	*	*	*	*	*	*	*	*	*	*	*	*	*	*	*	*	*	*	*	*	*	*	*	*	*	*	*	*
23	Quintana Roo	4	Othón P. Blanco	2183	Ninguno	884037	183306	60	6	*	*	*	*	*	*	*	*	*	*	*	*	*	*	*	*	*	*	*	*	*	*	*	*	*	*	*	*	*	*	*	*	*	*	*	*	*	*	*	*
23	Quintana Roo	4	Othón P. Blanco	2186	Mayajade	874538	183633	2	4	*	*	*	*	*	*	*	*	*	*	*	*	*	*	*	*	*	*	*	*	*	*	*	*	*	*	*	*	*	*	*	*	*	*	*	*	*	*	*	*
23	Quintana Roo	4	Othón P. Blanco	2187	Javier Sandoval	883320	184627	26	1	*	*	*	*	*	*	*	*	*	*	*	*	*	*	*	*	*	*	*	*	*	*	*	*	*	*	*	*	*	*	*	*	*	*	*	*	*	*	*	*
23	Quintana Roo	4	Othón P. Blanco	2188	El Jordán	881144	184934	10	1	*	*	*	*	*	*	*	*	*	*	*	*	*	*	*	*	*	*	*	*	*	*	*	*	*	*	*	*	*	*	*	*	*	*	*	*	*	*	*	*
23	Quintana Roo	4	Othón P. Blanco	2193	Rancho Israel	874336	184545	1	6	*	*	*	*	*	*	*	*	*	*	*	*	*	*	*	*	*	*	*	*	*	*	*	*	*	*	*	*	*	*	*	*	*	*	*	*	*	*	*	*
23	Quintana Roo	4	Othón P. Blanco	2194	Kabah-Na	874336	183907	1	1	*	*	*	*	*	*	*	*	*	*	*	*	*	*	*	*	*	*	*	*	*	*	*	*	*	*	*	*	*	*	*	*	*	*	*	*	*	*	*	*
23	Quintana Roo	4	Othón P. Blanco	2198	El Makulí	874203	184526	1	30	15	15	7	2	5	23	13	10	22	13	9	17	10	7	15	9	6	14	9	5	2	0	2	4	3	1	3	2	1	2	1	1	1	0	1	9	5	4	6	0
23	Quintana Roo	4	Othón P. Blanco	2200	Manuel Palma	884348	183511	61	1	*	*	*	*	*	*	*	*	*	*	*	*	*	*	*	*	*	*	*	*	*	*	*	*	*	*	*	*	*	*	*	*	*	*	*	*	*	*	*	*
23	Quintana Roo	4	Othón P. Blanco	2216	El Porvenir	890402	185857	75	6	*	*	*	*	*	*	*	*	*	*	*	*	*	*	*	*	*	*	*	*	*	*	*	*	*	*	*	*	*	*	*	*	*	*	*	*	*	*	*	*
23	Quintana Roo	4	Othón P. Blanco	2217	Primero de Mayo	884410	183413	70	2	*	*	*	*	*	*	*	*	*	*	*	*	*	*	*	*	*	*	*	*	*	*	*	*	*	*	*	*	*	*	*	*	*	*	*	*	*	*	*	*
23	Quintana Roo	4	Othón P. Blanco	2224	Rancho Alegre	885923	184215	90	6	*	*	*	*	*	*	*	*	*	*	*	*	*	*	*	*	*	*	*	*	*	*	*	*	*	*	*	*	*	*	*	*	*	*	*	*	*	*	*	*
23	Quintana Roo	4	Othón P. Blanco	2231	El Porvenir	884855	183703	66	2	*	*	*	*	*	*	*	*	*	*	*	*	*	*	*	*	*	*	*	*	*	*	*	*	*	*	*	*	*	*	*	*	*	*	*	*	*	*	*	*
23	Quintana Roo	4	Othón P. Blanco	2234	El Salvador	883759	183322	40	4	*	*	*	*	*	*	*	*	*	*	*	*	*	*	*	*	*	*	*	*	*	*	*	*	*	*	*	*	*	*	*	*	*	*	*	*	*	*	*	*
23	Quintana Roo	4	Othón P. Blanco	2236	San Ramón	882244	184302	15	6	*	*	*	*	*	*	*	*	*	*	*	*	*	*	*	*	*	*	*	*	*	*	*	*	*	*	*	*	*	*	*	*	*	*	*	*	*	*	*	*
23	Quintana Roo	4	Othón P. Blanco	2238	La Providencia	885913	184247	86	2	*	*	*	*	*	*	*	*	*	*	*	*	*	*	*	*	*	*	*	*	*	*	*	*	*	*	*	*	*	*	*	*	*	*	*	*	*	*	*	*
23	Quintana Roo	4	Othón P. Blanco	2243	Playa Uvero	873700	185709	0	5	4	1	0	0	0	5	4	1	5	4	1	5	4	1	5	4	1	5	4	1	0	0	0	0	0	0	0	0	0	0	0	0	0	0	0	0	0	0	0	4
23	Quintana Roo	4	Othón P. Blanco	2245	Tierra Maya	874956	181748	1	1	*	*	*	*	*	*	*	*	*	*	*	*	*	*	*	*	*	*	*	*	*	*	*	*	*	*	*	*	*	*	*	*	*	*	*	*	*	*	*	*
23	Quintana Roo	4	Othón P. Blanco	2248	Las Uvas	874335	183953	1	2	*	*	*	*	*	*	*	*	*	*	*	*	*	*	*	*	*	*	*	*	*	*	*	*	*	*	*	*	*	*	*	*	*	*	*	*	*	*	*	*
23	Quintana Roo	4	Othón P. Blanco	2249	La Casona	873528	190023	1	5	3	2	0	0	0	5	3	2	5	3	2	5	3	2	5	3	2	5	3	2	0	0	0	0	0	0	0	0	0	0	0	0	0	0	0	2	1	1	2	0
23	Quintana Roo	4	Othón P. Blanco	2253	Villa de Leyva	881505	184819	10	6	*	*	*	*	*	*	*	*	*	*	*	*	*	*	*	*	*	*	*	*	*	*	*	*	*	*	*	*	*	*	*	*	*	*	*	*	*	*	*	*
23	Quintana Roo	4	Othón P. Blanco	2254	Alfredo Barradas Domínguez	883404	183103	30	6	*	*	*	*	*	*	*	*	*	*	*	*	*	*	*	*	*	*	*	*	*	*	*	*	*	*	*	*	*	*	*	*	*	*	*	*	*	*	*	*
23	Quintana Roo	4	Othón P. Blanco	2258	Ninguno	881526	183338	11	2	*	*	*	*	*	*	*	*	*	*	*	*	*	*	*	*	*	*	*	*	*	*	*	*	*	*	*	*	*	*	*	*	*	*	*	*	*	*	*	*
23	Quintana Roo	4	Othón P. Blanco	2261	Loma Seca	883337	183037	20	4	*	*	*	*	*	*	*	*	*	*	*	*	*	*	*	*	*	*	*	*	*	*	*	*	*	*	*	*	*	*	*	*	*	*	*	*	*	*	*	*
23	Quintana Roo	4	Othón P. Blanco	2262	Martina López Cortés	881524	183335	11	6	*	*	*	*	*	*	*	*	*	*	*	*	*	*	*	*	*	*	*	*	*	*	*	*	*	*	*	*	*	*	*	*	*	*	*	*	*	*	*	*
23	Quintana Roo	4	Othón P. Blanco	2266	Poot Bradley	881525	183337	11	2	*	*	*	*	*	*	*	*	*	*	*	*	*	*	*	*	*	*	*	*	*	*	*	*	*	*	*	*	*	*	*	*	*	*	*	*	*	*	*	*
23	Quintana Roo	4	Othón P. Blanco	2267	Rancho Rosario	881531	183342	10	5	*	*	*	*	*	*	*	*	*	*	*	*	*	*	*	*	*	*	*	*	*	*	*	*	*	*	*	*	*	*	*	*	*	*	*	*	*	*	*	*
23	Quintana Roo	4	Othón P. Blanco	2268	Rancho Sur	882033	185054	20	2	*	*	*	*	*	*	*	*	*	*	*	*	*	*	*	*	*	*	*	*	*	*	*	*	*	*	*	*	*	*	*	*	*	*	*	*	*	*	*	*
23	Quintana Roo	4	Othón P. Blanco	2269	San Luis	882113	185035	11	1	*	*	*	*	*	*	*	*	*	*	*	*	*	*	*	*	*	*	*	*	*	*	*	*	*	*	*	*	*	*	*	*	*	*	*	*	*	*	*	*
23	Quintana Roo	4	Othón P. Blanco	2270	Santa Cruz	882128	185054	20	5	*	*	*	*	*	*	*	*	*	*	*	*	*	*	*	*	*	*	*	*	*	*	*	*	*	*	*	*	*	*	*	*	*	*	*	*	*	*	*	*
23	Quintana Roo	4	Othón P. Blanco	2277	Bartolo Xool	881735	183441	10	3	*	*	*	*	*	*	*	*	*	*	*	*	*	*	*	*	*	*	*	*	*	*	*	*	*	*	*	*	*	*	*	*	*	*	*	*	*	*	*	*
23	Quintana Roo	4	Othón P. Blanco	2279	Carlos Johny Várguez Ramírez	882416	183301	12	2	*	*	*	*	*	*	*	*	*	*	*	*	*	*	*	*	*	*	*	*	*	*	*	*	*	*	*	*	*	*	*	*	*	*	*	*	*	*	*	*
23	Quintana Roo	4	Othón P. Blanco	2286	Eduardo Ovando	881736	183819	10	1	*	*	*	*	*	*	*	*	*	*	*	*	*	*	*	*	*	*	*	*	*	*	*	*	*	*	*	*	*	*	*	*	*	*	*	*	*	*	*	*
23	Quintana Roo	4	Othón P. Blanco	2288	Pedro Pescador	881408	184909	10	5	*	*	*	*	*	*	*	*	*	*	*	*	*	*	*	*	*	*	*	*	*	*	*	*	*	*	*	*	*	*	*	*	*	*	*	*	*	*	*	*
23	Quintana Roo	4	Othón P. Blanco	2291	La Fe	875128	181613	8	4	*	*	*	*	*	*	*	*	*	*	*	*	*	*	*	*	*	*	*	*	*	*	*	*	*	*	*	*	*	*	*	*	*	*	*	*	*	*	*	*
23	Quintana Roo	4	Othón P. Blanco	2294	Casa de los Sueños	874830	182046	1	2	*	*	*	*	*	*	*	*	*	*	*	*	*	*	*	*	*	*	*	*	*	*	*	*	*	*	*	*	*	*	*	*	*	*	*	*	*	*	*	*
23	Quintana Roo	4	Othón P. Blanco	2296	La Huerta de Alcalá	881426	183805	10	3	*	*	*	*	*	*	*	*	*	*	*	*	*	*	*	*	*	*	*	*	*	*	*	*	*	*	*	*	*	*	*	*	*	*	*	*	*	*	*	*
23	Quintana Roo	4	Othón P. Blanco	2303	Mejía Castellanos	881347	184933	10	2	*	*	*	*	*	*	*	*	*	*	*	*	*	*	*	*	*	*	*	*	*	*	*	*	*	*	*	*	*	*	*	*	*	*	*	*	*	*	*	*
23	Quintana Roo	4	Othón P. Blanco	2304	Ninguno	881813	183424	10	1	*	*	*	*	*	*	*	*	*	*	*	*	*	*	*	*	*	*	*	*	*	*	*	*	*	*	*	*	*	*	*	*	*	*	*	*	*	*	*	*
23	Quintana Roo	4	Othón P. Blanco	2308	Jorge Cano	882811	184552	20	2	*	*	*	*	*	*	*	*	*	*	*	*	*	*	*	*	*	*	*	*	*	*	*	*	*	*	*	*	*	*	*	*	*	*	*	*	*	*	*	*
23	Quintana Roo	4	Othón P. Blanco	2310	Juan Hernández Rosales	881223	184538	10	2	*	*	*	*	*	*	*	*	*	*	*	*	*	*	*	*	*	*	*	*	*	*	*	*	*	*	*	*	*	*	*	*	*	*	*	*	*	*	*	*
23	Quintana Roo	4	Othón P. Blanco	2312	Julio Magaña	881902	183440	10	2	*	*	*	*	*	*	*	*	*	*	*	*	*	*	*	*	*	*	*	*	*	*	*	*	*	*	*	*	*	*	*	*	*	*	*	*	*	*	*	*
23	Quintana Roo	4	Othón P. Blanco	2313	Jung Matthee	874335	183913	1	3	*	*	*	*	*	*	*	*	*	*	*	*	*	*	*	*	*	*	*	*	*	*	*	*	*	*	*	*	*	*	*	*	*	*	*	*	*	*	*	*
23	Quintana Roo	4	Othón P. Blanco	2315	El Kiwi	890506	185703	87	2	*	*	*	*	*	*	*	*	*	*	*	*	*	*	*	*	*	*	*	*	*	*	*	*	*	*	*	*	*	*	*	*	*	*	*	*	*	*	*	*
23	Quintana Roo	4	Othón P. Blanco	2320	Merari Can	882839	184626	20	3	*	*	*	*	*	*	*	*	*	*	*	*	*	*	*	*	*	*	*	*	*	*	*	*	*	*	*	*	*	*	*	*	*	*	*	*	*	*	*	*
23	Quintana Roo	4	Othón P. Blanco	2323	Nicolás Bravo	885605	182710	100	7	*	*	*	*	*	*	*	*	*	*	*	*	*	*	*	*	*	*	*	*	*	*	*	*	*	*	*	*	*	*	*	*	*	*	*	*	*	*	*	*
23	Quintana Roo	4	Othón P. Blanco	2324	Gilberto González	881203	184559	10	1	*	*	*	*	*	*	*	*	*	*	*	*	*	*	*	*	*	*	*	*	*	*	*	*	*	*	*	*	*	*	*	*	*	*	*	*	*	*	*	*
23	Quintana Roo	4	Othón P. Blanco	2330	Ramón	881744	183912	10	8	*	*	*	*	*	*	*	*	*	*	*	*	*	*	*	*	*	*	*	*	*	*	*	*	*	*	*	*	*	*	*	*	*	*	*	*	*	*	*	*
23	Quintana Roo	4	Othón P. Blanco	2333	Rancho Sandoval	881609	183446	10	3	*	*	*	*	*	*	*	*	*	*	*	*	*	*	*	*	*	*	*	*	*	*	*	*	*	*	*	*	*	*	*	*	*	*	*	*	*	*	*	*
23	Quintana Roo	4	Othón P. Blanco	2347	Ninguno	874137	184545	1	1	*	*	*	*	*	*	*	*	*	*	*	*	*	*	*	*	*	*	*	*	*	*	*	*	*	*	*	*	*	*	*	*	*	*	*	*	*	*	*	*
23	Quintana Roo	4	Othón P. Blanco	2348	El Paraíso	874331	184542	1	6	*	*	*	*	*	*	*	*	*	*	*	*	*	*	*	*	*	*	*	*	*	*	*	*	*	*	*	*	*	*	*	*	*	*	*	*	*	*	*	*
23	Quintana Roo	4	Othón P. Blanco	2358	El Salto del Tigre	881754	183943	9	4	*	*	*	*	*	*	*	*	*	*	*	*	*	*	*	*	*	*	*	*	*	*	*	*	*	*	*	*	*	*	*	*	*	*	*	*	*	*	*	*
23	Quintana Roo	4	Othón P. Blanco	2361	Rancho Adulam	881326	183827	10	6	*	*	*	*	*	*	*	*	*	*	*	*	*	*	*	*	*	*	*	*	*	*	*	*	*	*	*	*	*	*	*	*	*	*	*	*	*	*	*	*
23	Quintana Roo	4	Othón P. Blanco	2363	Santa Lucía	881336	183638	10	1	*	*	*	*	*	*	*	*	*	*	*	*	*	*	*	*	*	*	*	*	*	*	*	*	*	*	*	*	*	*	*	*	*	*	*	*	*	*	*	*
23	Quintana Roo	4	Othón P. Blanco	2368	El Mameyal	885605	182016	150	1	*	*	*	*	*	*	*	*	*	*	*	*	*	*	*	*	*	*	*	*	*	*	*	*	*	*	*	*	*	*	*	*	*	*	*	*	*	*	*	*
23	Quintana Roo	4	Othón P. Blanco	2369	Los Cascabeles	885218	182758	80	1	*	*	*	*	*	*	*	*	*	*	*	*	*	*	*	*	*	*	*	*	*	*	*	*	*	*	*	*	*	*	*	*	*	*	*	*	*	*	*	*
23	Quintana Roo	4	Othón P. Blanco	2370	El Sacrificio	885514	182512	148	3	*	*	*	*	*	*	*	*	*	*	*	*	*	*	*	*	*	*	*	*	*	*	*	*	*	*	*	*	*	*	*	*	*	*	*	*	*	*	*	*
23	Quintana Roo	4	Othón P. Blanco	2373	La Unión	885442	182315	135	1	*	*	*	*	*	*	*	*	*	*	*	*	*	*	*	*	*	*	*	*	*	*	*	*	*	*	*	*	*	*	*	*	*	*	*	*	*	*	*	*
23	Quintana Roo	4	Othón P. Blanco	2377	El Cedral	882053	185023	16	3	*	*	*	*	*	*	*	*	*	*	*	*	*	*	*	*	*	*	*	*	*	*	*	*	*	*	*	*	*	*	*	*	*	*	*	*	*	*	*	*
23	Quintana Roo	4	Othón P. Blanco	2381	Balam Kú	874317	184050	1	2	*	*	*	*	*	*	*	*	*	*	*	*	*	*	*	*	*	*	*	*	*	*	*	*	*	*	*	*	*	*	*	*	*	*	*	*	*	*	*	*
23	Quintana Roo	4	Othón P. Blanco	2388	Casa Alegría	875005	181705	1	4	*	*	*	*	*	*	*	*	*	*	*	*	*	*	*	*	*	*	*	*	*	*	*	*	*	*	*	*	*	*	*	*	*	*	*	*	*	*	*	*
23	Quintana Roo	4	Othón P. Blanco	2391	El Abuelo Félix	874800	182141	0	1	*	*	*	*	*	*	*	*	*	*	*	*	*	*	*	*	*	*	*	*	*	*	*	*	*	*	*	*	*	*	*	*	*	*	*	*	*	*	*	*
23	Quintana Roo	4	Othón P. Blanco	2395	Granja Acuícola del Caribe	883757	183306	41	1	*	*	*	*	*	*	*	*	*	*	*	*	*	*	*	*	*	*	*	*	*	*	*	*	*	*	*	*	*	*	*	*	*	*	*	*	*	*	*	*
23	Quintana Roo	4	Othón P. Blanco	2398	El Jabín	874608	183627	2	11	*	*	*	*	*	*	*	*	*	*	*	*	*	*	*	*	*	*	*	*	*	*	*	*	*	*	*	*	*	*	*	*	*	*	*	*	*	*	*	*
23	Quintana Roo	4	Othón P. Blanco	2401	Kimmels	874949	181810	1	4	*	*	*	*	*	*	*	*	*	*	*	*	*	*	*	*	*	*	*	*	*	*	*	*	*	*	*	*	*	*	*	*	*	*	*	*	*	*	*	*
23	Quintana Roo	4	Othón P. Blanco	2403	Maya Chan	874327	184018	1	1	*	*	*	*	*	*	*	*	*	*	*	*	*	*	*	*	*	*	*	*	*	*	*	*	*	*	*	*	*	*	*	*	*	*	*	*	*	*	*	*
23	Quintana Roo	4	Othón P. Blanco	2414	Ninguno	883652	183257	38	1	*	*	*	*	*	*	*	*	*	*	*	*	*	*	*	*	*	*	*	*	*	*	*	*	*	*	*	*	*	*	*	*	*	*	*	*	*	*	*	*
23	Quintana Roo	4	Othón P. Blanco	2415	Ninguno	883759	183325	41	2	*	*	*	*	*	*	*	*	*	*	*	*	*	*	*	*	*	*	*	*	*	*	*	*	*	*	*	*	*	*	*	*	*	*	*	*	*	*	*	*
23	Quintana Roo	4	Othón P. Blanco	2421	Casa Tranquila	874815	182102	1	2	*	*	*	*	*	*	*	*	*	*	*	*	*	*	*	*	*	*	*	*	*	*	*	*	*	*	*	*	*	*	*	*	*	*	*	*	*	*	*	*
23	Quintana Roo	4	Othón P. Blanco	2424	El Oasis	874853	185116	7	6	*	*	*	*	*	*	*	*	*	*	*	*	*	*	*	*	*	*	*	*	*	*	*	*	*	*	*	*	*	*	*	*	*	*	*	*	*	*	*	*
23	Quintana Roo	4	Othón P. Blanco	2428	El Placer	873759	185403	1	10	6	4	0	0	0	10	6	4	10	6	4	9	5	4	9	5	4	9	5	4	0	0	0	1	1	0	1	1	0	0	0	0	0	0	0	0	0	0	1	2
23	Quintana Roo	4	Othón P. Blanco	2430	Rancho Escorpión	874341	183850	1	4	*	*	*	*	*	*	*	*	*	*	*	*	*	*	*	*	*	*	*	*	*	*	*	*	*	*	*	*	*	*	*	*	*	*	*	*	*	*	*	*
23	Quintana Roo	4	Othón P. Blanco	2436	El Rincón	882314	183105	10	1	*	*	*	*	*	*	*	*	*	*	*	*	*	*	*	*	*	*	*	*	*	*	*	*	*	*	*	*	*	*	*	*	*	*	*	*	*	*	*	*
23	Quintana Roo	4	Othón P. Blanco	2438	San Judas Tadeo	882339	183448	12	1	*	*	*	*	*	*	*	*	*	*	*	*	*	*	*	*	*	*	*	*	*	*	*	*	*	*	*	*	*	*	*	*	*	*	*	*	*	*	*	*
23	Quintana Roo	4	Othón P. Blanco	2442	Travel Inn	874327	184022	1	4	*	*	*	*	*	*	*	*	*	*	*	*	*	*	*	*	*	*	*	*	*	*	*	*	*	*	*	*	*	*	*	*	*	*	*	*	*	*	*	*
23	Quintana Roo	4	Othón P. Blanco	2450	Bougain Villa	874310	184106	1	1	*	*	*	*	*	*	*	*	*	*	*	*	*	*	*	*	*	*	*	*	*	*	*	*	*	*	*	*	*	*	*	*	*	*	*	*	*	*	*	*
23	Quintana Roo	4	Othón P. Blanco	2452	Margarita del Sol	874334	183957	1	1	*	*	*	*	*	*	*	*	*	*	*	*	*	*	*	*	*	*	*	*	*	*	*	*	*	*	*	*	*	*	*	*	*	*	*	*	*	*	*	*
23	Quintana Roo	4	Othón P. Blanco	2453	Maya Luna	874305	184111	1	2	*	*	*	*	*	*	*	*	*	*	*	*	*	*	*	*	*	*	*	*	*	*	*	*	*	*	*	*	*	*	*	*	*	*	*	*	*	*	*	*
23	Quintana Roo	4	Othón P. Blanco	2454	Playa Maya	874334	183939	0	2	*	*	*	*	*	*	*	*	*	*	*	*	*	*	*	*	*	*	*	*	*	*	*	*	*	*	*	*	*	*	*	*	*	*	*	*	*	*	*	*
23	Quintana Roo	4	Othón P. Blanco	2455	San Juan	874335	183956	1	3	*	*	*	*	*	*	*	*	*	*	*	*	*	*	*	*	*	*	*	*	*	*	*	*	*	*	*	*	*	*	*	*	*	*	*	*	*	*	*	*
23	Quintana Roo	4	Othón P. Blanco	2456	El Cerro	884739	183818	66	3	*	*	*	*	*	*	*	*	*	*	*	*	*	*	*	*	*	*	*	*	*	*	*	*	*	*	*	*	*	*	*	*	*	*	*	*	*	*	*	*
23	Quintana Roo	4	Othón P. Blanco	2467	Casa Escondida	874836	182040	1	4	*	*	*	*	*	*	*	*	*	*	*	*	*	*	*	*	*	*	*	*	*	*	*	*	*	*	*	*	*	*	*	*	*	*	*	*	*	*	*	*
23	Quintana Roo	4	Othón P. Blanco	2468	Casa Caracola	874845	182030	1	3	*	*	*	*	*	*	*	*	*	*	*	*	*	*	*	*	*	*	*	*	*	*	*	*	*	*	*	*	*	*	*	*	*	*	*	*	*	*	*	*
23	Quintana Roo	4	Othón P. Blanco	2470	El Oasis	874342	183847	1	1	*	*	*	*	*	*	*	*	*	*	*	*	*	*	*	*	*	*	*	*	*	*	*	*	*	*	*	*	*	*	*	*	*	*	*	*	*	*	*	*
23	Quintana Roo	4	Othón P. Blanco	2473	La Herradura	881335	185954	10	2	*	*	*	*	*	*	*	*	*	*	*	*	*	*	*	*	*	*	*	*	*	*	*	*	*	*	*	*	*	*	*	*	*	*	*	*	*	*	*	*
23	Quintana Roo	4	Othón P. Blanco	2486	Rancho Gabriela	874508	184012	7	8	*	*	*	*	*	*	*	*	*	*	*	*	*	*	*	*	*	*	*	*	*	*	*	*	*	*	*	*	*	*	*	*	*	*	*	*	*	*	*	*
23	Quintana Roo	4	Othón P. Blanco	2489	Los Compayitos	874409	184116	8	10	4	6	3	1	2	7	3	4	6	3	3	6	3	3	6	3	3	6	3	3	1	0	1	0	0	0	0	0	0	0	0	0	0	0	0	2	0	2	3	0
23	Quintana Roo	4	Othón P. Blanco	2493	Los Tres Ases	890608	183124	127	1	*	*	*	*	*	*	*	*	*	*	*	*	*	*	*	*	*	*	*	*	*	*	*	*	*	*	*	*	*	*	*	*	*	*	*	*	*	*	*	*
23	Quintana Roo	4	Othón P. Blanco	2494	Los Tres Castillo	881332	183735	10	4	*	*	*	*	*	*	*	*	*	*	*	*	*	*	*	*	*	*	*	*	*	*	*	*	*	*	*	*	*	*	*	*	*	*	*	*	*	*	*	*
23	Quintana Roo	4	Othón P. Blanco	2498	Chumbec	881905	183353	10	1	*	*	*	*	*	*	*	*	*	*	*	*	*	*	*	*	*	*	*	*	*	*	*	*	*	*	*	*	*	*	*	*	*	*	*	*	*	*	*	*
23	Quintana Roo	4	Othón P. Blanco	2500	Colli	881609	183252	11	8	*	*	*	*	*	*	*	*	*	*	*	*	*	*	*	*	*	*	*	*	*	*	*	*	*	*	*	*	*	*	*	*	*	*	*	*	*	*	*	*
23	Quintana Roo	4	Othón P. Blanco	2502	Cornelio Witzil	882015	183000	10	1	*	*	*	*	*	*	*	*	*	*	*	*	*	*	*	*	*	*	*	*	*	*	*	*	*	*	*	*	*	*	*	*	*	*	*	*	*	*	*	*
23	Quintana Roo	4	Othón P. Blanco	2503	Don Saba	881954	183233	10	1	*	*	*	*	*	*	*	*	*	*	*	*	*	*	*	*	*	*	*	*	*	*	*	*	*	*	*	*	*	*	*	*	*	*	*	*	*	*	*	*
23	Quintana Roo	4	Othón P. Blanco	2508	El Gaucho	885538	182652	120	5	*	*	*	*	*	*	*	*	*	*	*	*	*	*	*	*	*	*	*	*	*	*	*	*	*	*	*	*	*	*	*	*	*	*	*	*	*	*	*	*
23	Quintana Roo	4	Othón P. Blanco	2509	La Gran Batalla	882018	183305	10	1	*	*	*	*	*	*	*	*	*	*	*	*	*	*	*	*	*	*	*	*	*	*	*	*	*	*	*	*	*	*	*	*	*	*	*	*	*	*	*	*
23	Quintana Roo	4	Othón P. Blanco	2512	Hugo Trejo	882445	183042	10	3	*	*	*	*	*	*	*	*	*	*	*	*	*	*	*	*	*	*	*	*	*	*	*	*	*	*	*	*	*	*	*	*	*	*	*	*	*	*	*	*
23	Quintana Roo	4	Othón P. Blanco	2513	Las Ilusiones	881618	183227	13	12	*	*	*	*	*	*	*	*	*	*	*	*	*	*	*	*	*	*	*	*	*	*	*	*	*	*	*	*	*	*	*	*	*	*	*	*	*	*	*	*
23	Quintana Roo	4	Othón P. Blanco	2515	Jaime Peraza	881717	183313	14	9	*	*	*	*	*	*	*	*	*	*	*	*	*	*	*	*	*	*	*	*	*	*	*	*	*	*	*	*	*	*	*	*	*	*	*	*	*	*	*	*
23	Quintana Roo	4	Othón P. Blanco	2518	Los Lirios	884532	183111	60	3	*	*	*	*	*	*	*	*	*	*	*	*	*	*	*	*	*	*	*	*	*	*	*	*	*	*	*	*	*	*	*	*	*	*	*	*	*	*	*	*
23	Quintana Roo	4	Othón P. Blanco	2521	Ninguno	883946	181542	42	3	*	*	*	*	*	*	*	*	*	*	*	*	*	*	*	*	*	*	*	*	*	*	*	*	*	*	*	*	*	*	*	*	*	*	*	*	*	*	*	*
23	Quintana Roo	4	Othón P. Blanco	2524	Las Margaritas	881618	183258	10	1	*	*	*	*	*	*	*	*	*	*	*	*	*	*	*	*	*	*	*	*	*	*	*	*	*	*	*	*	*	*	*	*	*	*	*	*	*	*	*	*
23	Quintana Roo	4	Othón P. Blanco	2527	Las Palmas	882018	183242	10	4	*	*	*	*	*	*	*	*	*	*	*	*	*	*	*	*	*	*	*	*	*	*	*	*	*	*	*	*	*	*	*	*	*	*	*	*	*	*	*	*
23	Quintana Roo	4	Othón P. Blanco	2529	La Perla	885425	182501	115	1	*	*	*	*	*	*	*	*	*	*	*	*	*	*	*	*	*	*	*	*	*	*	*	*	*	*	*	*	*	*	*	*	*	*	*	*	*	*	*	*
23	Quintana Roo	4	Othón P. Blanco	2530	El Potrillo	881158	184922	10	8	*	*	*	*	*	*	*	*	*	*	*	*	*	*	*	*	*	*	*	*	*	*	*	*	*	*	*	*	*	*	*	*	*	*	*	*	*	*	*	*
23	Quintana Roo	4	Othón P. Blanco	2531	La Primavera	881627	184540	10	3	*	*	*	*	*	*	*	*	*	*	*	*	*	*	*	*	*	*	*	*	*	*	*	*	*	*	*	*	*	*	*	*	*	*	*	*	*	*	*	*
23	Quintana Roo	4	Othón P. Blanco	2532	Progreso	885405	182730	90	1	*	*	*	*	*	*	*	*	*	*	*	*	*	*	*	*	*	*	*	*	*	*	*	*	*	*	*	*	*	*	*	*	*	*	*	*	*	*	*	*
23	Quintana Roo	4	Othón P. Blanco	2537	Aurelio Uh Xool	881613	183256	11	4	*	*	*	*	*	*	*	*	*	*	*	*	*	*	*	*	*	*	*	*	*	*	*	*	*	*	*	*	*	*	*	*	*	*	*	*	*	*	*	*
23	Quintana Roo	4	Othón P. Blanco	2538	Salamanca	882822	184027	40	967	471	496	108	50	58	859	421	438	771	379	392	521	264	257	433	218	215	362	186	176	122	57	65	216	100	116	228	112	116	88	46	42	71	32	39	97	53	44	191	19
23	Quintana Roo	4	Othón P. Blanco	2540	Sac-Ha	882551	183618	18	3	*	*	*	*	*	*	*	*	*	*	*	*	*	*	*	*	*	*	*	*	*	*	*	*	*	*	*	*	*	*	*	*	*	*	*	*	*	*	*	*
23	Quintana Roo	4	Othón P. Blanco	2543	Cuatro Banderas	885940	191149	75	30	17	13	1	0	1	29	17	12	28	16	12	21	12	9	13	7	6	11	5	6	1	1	0	7	4	3	14	8	6	8	5	3	2	2	0	1	0	1	6	0
23	Quintana Roo	4	Othón P. Blanco	2544	Armando Poot	882632	183055	10	3	*	*	*	*	*	*	*	*	*	*	*	*	*	*	*	*	*	*	*	*	*	*	*	*	*	*	*	*	*	*	*	*	*	*	*	*	*	*	*	*
23	Quintana Roo	4	Othón P. Blanco	2545	Panto-Ha [Balneario]	882647	183417	14	3	*	*	*	*	*	*	*	*	*	*	*	*	*	*	*	*	*	*	*	*	*	*	*	*	*	*	*	*	*	*	*	*	*	*	*	*	*	*	*	*
23	Quintana Roo	4	Othón P. Blanco	2550	Chacbel-Ha	882537	183648	10	2	*	*	*	*	*	*	*	*	*	*	*	*	*	*	*	*	*	*	*	*	*	*	*	*	*	*	*	*	*	*	*	*	*	*	*	*	*	*	*	*
23	Quintana Roo	4	Othón P. Blanco	2552	Don Chabelo	884218	183645	64	2	*	*	*	*	*	*	*	*	*	*	*	*	*	*	*	*	*	*	*	*	*	*	*	*	*	*	*	*	*	*	*	*	*	*	*	*	*	*	*	*
23	Quintana Roo	4	Othón P. Blanco	2558	Los Gavilanes	883453	183405	43	1	*	*	*	*	*	*	*	*	*	*	*	*	*	*	*	*	*	*	*	*	*	*	*	*	*	*	*	*	*	*	*	*	*	*	*	*	*	*	*	*
23	Quintana Roo	4	Othón P. Blanco	2559	Las Glorias	882744	183133	24	5	*	*	*	*	*	*	*	*	*	*	*	*	*	*	*	*	*	*	*	*	*	*	*	*	*	*	*	*	*	*	*	*	*	*	*	*	*	*	*	*
23	Quintana Roo	4	Othón P. Blanco	2560	Grúas Jaswor	882704	183047	10	1	*	*	*	*	*	*	*	*	*	*	*	*	*	*	*	*	*	*	*	*	*	*	*	*	*	*	*	*	*	*	*	*	*	*	*	*	*	*	*	*
23	Quintana Roo	4	Othón P. Blanco	2562	Jesús Ceja López	882923	183417	49	3	*	*	*	*	*	*	*	*	*	*	*	*	*	*	*	*	*	*	*	*	*	*	*	*	*	*	*	*	*	*	*	*	*	*	*	*	*	*	*	*
23	Quintana Roo	4	Othón P. Blanco	2563	José López Zambrano	884321	183442	72	1	*	*	*	*	*	*	*	*	*	*	*	*	*	*	*	*	*	*	*	*	*	*	*	*	*	*	*	*	*	*	*	*	*	*	*	*	*	*	*	*
23	Quintana Roo	4	Othón P. Blanco	2564	Laguna Bonanza	882623	183527	11	4	*	*	*	*	*	*	*	*	*	*	*	*	*	*	*	*	*	*	*	*	*	*	*	*	*	*	*	*	*	*	*	*	*	*	*	*	*	*	*	*
23	Quintana Roo	4	Othón P. Blanco	2565	Ninguno	882646	183048	10	5	*	*	*	*	*	*	*	*	*	*	*	*	*	*	*	*	*	*	*	*	*	*	*	*	*	*	*	*	*	*	*	*	*	*	*	*	*	*	*	*
23	Quintana Roo	4	Othón P. Blanco	2566	Dany	882705	183644	20	1	*	*	*	*	*	*	*	*	*	*	*	*	*	*	*	*	*	*	*	*	*	*	*	*	*	*	*	*	*	*	*	*	*	*	*	*	*	*	*	*
23	Quintana Roo	4	Othón P. Blanco	2570	Ninguno	883931	181347	40	3	*	*	*	*	*	*	*	*	*	*	*	*	*	*	*	*	*	*	*	*	*	*	*	*	*	*	*	*	*	*	*	*	*	*	*	*	*	*	*	*
23	Quintana Roo	4	Othón P. Blanco	2573	Luis López	884358	183416	70	2	*	*	*	*	*	*	*	*	*	*	*	*	*	*	*	*	*	*	*	*	*	*	*	*	*	*	*	*	*	*	*	*	*	*	*	*	*	*	*	*
23	Quintana Roo	4	Othón P. Blanco	2576	Masay Mara	882550	183719	20	5	*	*	*	*	*	*	*	*	*	*	*	*	*	*	*	*	*	*	*	*	*	*	*	*	*	*	*	*	*	*	*	*	*	*	*	*	*	*	*	*
23	Quintana Roo	4	Othón P. Blanco	2580	La Potranquita	885231	175704	72	4	*	*	*	*	*	*	*	*	*	*	*	*	*	*	*	*	*	*	*	*	*	*	*	*	*	*	*	*	*	*	*	*	*	*	*	*	*	*	*	*
23	Quintana Roo	4	Othón P. Blanco	2581	Rancho Chabela	882634	183054	10	2	*	*	*	*	*	*	*	*	*	*	*	*	*	*	*	*	*	*	*	*	*	*	*	*	*	*	*	*	*	*	*	*	*	*	*	*	*	*	*	*
23	Quintana Roo	4	Othón P. Blanco	2582	Rancho David	884229	183713	60	2	*	*	*	*	*	*	*	*	*	*	*	*	*	*	*	*	*	*	*	*	*	*	*	*	*	*	*	*	*	*	*	*	*	*	*	*	*	*	*	*
23	Quintana Roo	4	Othón P. Blanco	2583	Rancho Isabel	882751	183137	25	6	*	*	*	*	*	*	*	*	*	*	*	*	*	*	*	*	*	*	*	*	*	*	*	*	*	*	*	*	*	*	*	*	*	*	*	*	*	*	*	*
23	Quintana Roo	4	Othón P. Blanco	2585	Rancho Paquita	882053	184148	10	2	*	*	*	*	*	*	*	*	*	*	*	*	*	*	*	*	*	*	*	*	*	*	*	*	*	*	*	*	*	*	*	*	*	*	*	*	*	*	*	*
23	Quintana Roo	4	Othón P. Blanco	2588	San Isidro	881549	183739	10	2	*	*	*	*	*	*	*	*	*	*	*	*	*	*	*	*	*	*	*	*	*	*	*	*	*	*	*	*	*	*	*	*	*	*	*	*	*	*	*	*
23	Quintana Roo	4	Othón P. Blanco	2589	San Marcos	882543	183126	10	5	*	*	*	*	*	*	*	*	*	*	*	*	*	*	*	*	*	*	*	*	*	*	*	*	*	*	*	*	*	*	*	*	*	*	*	*	*	*	*	*
23	Quintana Roo	4	Othón P. Blanco	2590	Santa Lucía	882715	183056	20	5	*	*	*	*	*	*	*	*	*	*	*	*	*	*	*	*	*	*	*	*	*	*	*	*	*	*	*	*	*	*	*	*	*	*	*	*	*	*	*	*
23	Quintana Roo	4	Othón P. Blanco	2591	Santa Martha	881751	183921	9	1	*	*	*	*	*	*	*	*	*	*	*	*	*	*	*	*	*	*	*	*	*	*	*	*	*	*	*	*	*	*	*	*	*	*	*	*	*	*	*	*
23	Quintana Roo	4	Othón P. Blanco	2593	El Tata	882658	183041	10	2	*	*	*	*	*	*	*	*	*	*	*	*	*	*	*	*	*	*	*	*	*	*	*	*	*	*	*	*	*	*	*	*	*	*	*	*	*	*	*	*
23	Quintana Roo	4	Othón P. Blanco	2596	Los Abuelos	881955	183212	10	2	*	*	*	*	*	*	*	*	*	*	*	*	*	*	*	*	*	*	*	*	*	*	*	*	*	*	*	*	*	*	*	*	*	*	*	*	*	*	*	*
23	Quintana Roo	4	Othón P. Blanco	2598	Agua Clara	883854	181955	28	2	*	*	*	*	*	*	*	*	*	*	*	*	*	*	*	*	*	*	*	*	*	*	*	*	*	*	*	*	*	*	*	*	*	*	*	*	*	*	*	*
23	Quintana Roo	4	Othón P. Blanco	2600	Los Alacranes	880635	190220	10	7	*	*	*	*	*	*	*	*	*	*	*	*	*	*	*	*	*	*	*	*	*	*	*	*	*	*	*	*	*	*	*	*	*	*	*	*	*	*	*	*
23	Quintana Roo	4	Othón P. Blanco	2603	Los Ángeles	882604	184323	29	2	*	*	*	*	*	*	*	*	*	*	*	*	*	*	*	*	*	*	*	*	*	*	*	*	*	*	*	*	*	*	*	*	*	*	*	*	*	*	*	*
23	Quintana Roo	4	Othón P. Blanco	2604	Antonio Hernández Villaseñor	883745	181750	35	1	*	*	*	*	*	*	*	*	*	*	*	*	*	*	*	*	*	*	*	*	*	*	*	*	*	*	*	*	*	*	*	*	*	*	*	*	*	*	*	*
23	Quintana Roo	4	Othón P. Blanco	2606	Aragón	890634	182815	139	2	*	*	*	*	*	*	*	*	*	*	*	*	*	*	*	*	*	*	*	*	*	*	*	*	*	*	*	*	*	*	*	*	*	*	*	*	*	*	*	*
23	Quintana Roo	4	Othón P. Blanco	2608	Las Auroras	884959	182750	109	4	*	*	*	*	*	*	*	*	*	*	*	*	*	*	*	*	*	*	*	*	*	*	*	*	*	*	*	*	*	*	*	*	*	*	*	*	*	*	*	*
23	Quintana Roo	4	Othón P. Blanco	2609	La Bendición	883447	182236	39	2	*	*	*	*	*	*	*	*	*	*	*	*	*	*	*	*	*	*	*	*	*	*	*	*	*	*	*	*	*	*	*	*	*	*	*	*	*	*	*	*
23	Quintana Roo	4	Othón P. Blanco	2610	Benito Juárez	881522	183635	10	2	*	*	*	*	*	*	*	*	*	*	*	*	*	*	*	*	*	*	*	*	*	*	*	*	*	*	*	*	*	*	*	*	*	*	*	*	*	*	*	*
23	Quintana Roo	4	Othón P. Blanco	2612	Bills Place	874357	183724	1	1	*	*	*	*	*	*	*	*	*	*	*	*	*	*	*	*	*	*	*	*	*	*	*	*	*	*	*	*	*	*	*	*	*	*	*	*	*	*	*	*
23	Quintana Roo	4	Othón P. Blanco	2615	Las Bugambilias	882921	183420	49	8	*	*	*	*	*	*	*	*	*	*	*	*	*	*	*	*	*	*	*	*	*	*	*	*	*	*	*	*	*	*	*	*	*	*	*	*	*	*	*	*
23	Quintana Roo	4	Othón P. Blanco	2616	Cabañas Angelina	881341	183559	9	3	*	*	*	*	*	*	*	*	*	*	*	*	*	*	*	*	*	*	*	*	*	*	*	*	*	*	*	*	*	*	*	*	*	*	*	*	*	*	*	*
23	Quintana Roo	4	Othón P. Blanco	2617	Los Cardenales	885300	190255	60	11	*	*	*	*	*	*	*	*	*	*	*	*	*	*	*	*	*	*	*	*	*	*	*	*	*	*	*	*	*	*	*	*	*	*	*	*	*	*	*	*
23	Quintana Roo	4	Othón P. Blanco	2621	Casa Margarita	874949	181815	1	2	*	*	*	*	*	*	*	*	*	*	*	*	*	*	*	*	*	*	*	*	*	*	*	*	*	*	*	*	*	*	*	*	*	*	*	*	*	*	*	*
23	Quintana Roo	4	Othón P. Blanco	2623	Casa Nico Linda	874951	181809	1	2	*	*	*	*	*	*	*	*	*	*	*	*	*	*	*	*	*	*	*	*	*	*	*	*	*	*	*	*	*	*	*	*	*	*	*	*	*	*	*	*
23	Quintana Roo	4	Othón P. Blanco	2625	Los Cascabeles	882015	183229	10	2	*	*	*	*	*	*	*	*	*	*	*	*	*	*	*	*	*	*	*	*	*	*	*	*	*	*	*	*	*	*	*	*	*	*	*	*	*	*	*	*
23	Quintana Roo	4	Othón P. Blanco	2626	Catorce Hermanos (Santa Lucía)	881521	183645	10	5	*	*	*	*	*	*	*	*	*	*	*	*	*	*	*	*	*	*	*	*	*	*	*	*	*	*	*	*	*	*	*	*	*	*	*	*	*	*	*	*
23	Quintana Roo	4	Othón P. Blanco	2627	Cayuco Maya	881936	184450	20	1	*	*	*	*	*	*	*	*	*	*	*	*	*	*	*	*	*	*	*	*	*	*	*	*	*	*	*	*	*	*	*	*	*	*	*	*	*	*	*	*
23	Quintana Roo	4	Othón P. Blanco	2629	El Cerro de la Campana	880756	190156	17	4	*	*	*	*	*	*	*	*	*	*	*	*	*	*	*	*	*	*	*	*	*	*	*	*	*	*	*	*	*	*	*	*	*	*	*	*	*	*	*	*
23	Quintana Roo	4	Othón P. Blanco	2630	La Chata	883358	184827	20	5	*	*	*	*	*	*	*	*	*	*	*	*	*	*	*	*	*	*	*	*	*	*	*	*	*	*	*	*	*	*	*	*	*	*	*	*	*	*	*	*
23	Quintana Roo	4	Othón P. Blanco	2632	Los Cinco Hermanos	883037	183338	48	2	*	*	*	*	*	*	*	*	*	*	*	*	*	*	*	*	*	*	*	*	*	*	*	*	*	*	*	*	*	*	*	*	*	*	*	*	*	*	*	*
23	Quintana Roo	4	Othón P. Blanco	2635	El Cocal	885315	182735	80	18	10	8	2	1	1	16	9	7	16	9	7	9	5	4	7	4	3	6	3	3	0	0	0	7	4	3	6	4	2	2	1	1	1	1	0	2	1	1	3	0
23	Quintana Roo	4	Othón P. Blanco	2640	El Compadre	881620	183341	10	3	*	*	*	*	*	*	*	*	*	*	*	*	*	*	*	*	*	*	*	*	*	*	*	*	*	*	*	*	*	*	*	*	*	*	*	*	*	*	*	*
23	Quintana Roo	4	Othón P. Blanco	2642	La Coruña	883211	185205	20	2	*	*	*	*	*	*	*	*	*	*	*	*	*	*	*	*	*	*	*	*	*	*	*	*	*	*	*	*	*	*	*	*	*	*	*	*	*	*	*	*
23	Quintana Roo	4	Othón P. Blanco	2643	Las Cruces	881519	183649	10	4	*	*	*	*	*	*	*	*	*	*	*	*	*	*	*	*	*	*	*	*	*	*	*	*	*	*	*	*	*	*	*	*	*	*	*	*	*	*	*	*
23	Quintana Roo	4	Othón P. Blanco	2644	Los Cuates	883849	184945	49	4	*	*	*	*	*	*	*	*	*	*	*	*	*	*	*	*	*	*	*	*	*	*	*	*	*	*	*	*	*	*	*	*	*	*	*	*	*	*	*	*
23	Quintana Roo	4	Othón P. Blanco	2645	Cuatro Ases	885529	190128	86	3	*	*	*	*	*	*	*	*	*	*	*	*	*	*	*	*	*	*	*	*	*	*	*	*	*	*	*	*	*	*	*	*	*	*	*	*	*	*	*	*
23	Quintana Roo	4	Othón P. Blanco	2646	Cuatro Potrillos	882646	184406	30	3	*	*	*	*	*	*	*	*	*	*	*	*	*	*	*	*	*	*	*	*	*	*	*	*	*	*	*	*	*	*	*	*	*	*	*	*	*	*	*	*
23	Quintana Roo	4	Othón P. Blanco	2648	El Diamante	882858	190740	30	2	*	*	*	*	*	*	*	*	*	*	*	*	*	*	*	*	*	*	*	*	*	*	*	*	*	*	*	*	*	*	*	*	*	*	*	*	*	*	*	*
23	Quintana Roo	4	Othón P. Blanco	2650	El Divino Niño	883831	181302	32	3	*	*	*	*	*	*	*	*	*	*	*	*	*	*	*	*	*	*	*	*	*	*	*	*	*	*	*	*	*	*	*	*	*	*	*	*	*	*	*	*
23	Quintana Roo	4	Othón P. Blanco	2651	El Dorado	883155	183607	58	6	*	*	*	*	*	*	*	*	*	*	*	*	*	*	*	*	*	*	*	*	*	*	*	*	*	*	*	*	*	*	*	*	*	*	*	*	*	*	*	*
23	Quintana Roo	4	Othón P. Blanco	2653	Eben Ezer	881347	183813	10	2	*	*	*	*	*	*	*	*	*	*	*	*	*	*	*	*	*	*	*	*	*	*	*	*	*	*	*	*	*	*	*	*	*	*	*	*	*	*	*	*
23	Quintana Roo	4	Othón P. Blanco	2654	Ecoaldea Río Hondo	883840	181610	38	1	*	*	*	*	*	*	*	*	*	*	*	*	*	*	*	*	*	*	*	*	*	*	*	*	*	*	*	*	*	*	*	*	*	*	*	*	*	*	*	*
23	Quintana Roo	4	Othón P. Blanco	2656	Eradio Interian	883154	183703	42	1	*	*	*	*	*	*	*	*	*	*	*	*	*	*	*	*	*	*	*	*	*	*	*	*	*	*	*	*	*	*	*	*	*	*	*	*	*	*	*	*
23	Quintana Roo	4	Othón P. Blanco	2658	La Esmeralda	882629	184349	30	6	*	*	*	*	*	*	*	*	*	*	*	*	*	*	*	*	*	*	*	*	*	*	*	*	*	*	*	*	*	*	*	*	*	*	*	*	*	*	*	*
23	Quintana Roo	4	Othón P. Blanco	2660	La Estrella	881532	183707	10	1	*	*	*	*	*	*	*	*	*	*	*	*	*	*	*	*	*	*	*	*	*	*	*	*	*	*	*	*	*	*	*	*	*	*	*	*	*	*	*	*
23	Quintana Roo	4	Othón P. Blanco	2662	Ex-Aserradero	881549	183313	10	15	6	9	0	0	0	15	6	9	14	5	9	6	3	3	6	3	3	5	2	3	2	1	1	7	2	5	3	2	1	0	0	0	1	1	0	1	0	1	3	0
23	Quintana Roo	4	Othón P. Blanco	2663	Finca Doña Carmen	882740	183712	21	2	*	*	*	*	*	*	*	*	*	*	*	*	*	*	*	*	*	*	*	*	*	*	*	*	*	*	*	*	*	*	*	*	*	*	*	*	*	*	*	*
23	Quintana Roo	4	Othón P. Blanco	2666	Germán Angulo	881616	183720	10	1	*	*	*	*	*	*	*	*	*	*	*	*	*	*	*	*	*	*	*	*	*	*	*	*	*	*	*	*	*	*	*	*	*	*	*	*	*	*	*	*
23	Quintana Roo	4	Othón P. Blanco	2667	Gilberto Pérez	884010	181234	39	1	*	*	*	*	*	*	*	*	*	*	*	*	*	*	*	*	*	*	*	*	*	*	*	*	*	*	*	*	*	*	*	*	*	*	*	*	*	*	*	*
23	Quintana Roo	4	Othón P. Blanco	2668	Los Girasoles	885015	191153	53	8	8	0	0	0	0	8	8	0	8	8	0	8	8	0	8	8	0	8	8	0	0	0	0	0	0	0	0	0	0	0	0	0	0	0	0	1	1	0	0	4
23	Quintana Roo	4	Othón P. Blanco	2669	Las Golondrinas	890312	190015	82	4	*	*	*	*	*	*	*	*	*	*	*	*	*	*	*	*	*	*	*	*	*	*	*	*	*	*	*	*	*	*	*	*	*	*	*	*	*	*	*	*
23	Quintana Roo	4	Othón P. Blanco	2670	Los González	890216	182607	123	2	*	*	*	*	*	*	*	*	*	*	*	*	*	*	*	*	*	*	*	*	*	*	*	*	*	*	*	*	*	*	*	*	*	*	*	*	*	*	*	*
23	Quintana Roo	4	Othón P. Blanco	2672	La Güera	890617	182813	137	5	*	*	*	*	*	*	*	*	*	*	*	*	*	*	*	*	*	*	*	*	*	*	*	*	*	*	*	*	*	*	*	*	*	*	*	*	*	*	*	*
23	Quintana Roo	4	Othón P. Blanco	2675	Hermanos Rosas	874726	182451	2	4	*	*	*	*	*	*	*	*	*	*	*	*	*	*	*	*	*	*	*	*	*	*	*	*	*	*	*	*	*	*	*	*	*	*	*	*	*	*	*	*
23	Quintana Roo	4	Othón P. Blanco	2677	La Herradura	890354	190002	80	4	*	*	*	*	*	*	*	*	*	*	*	*	*	*	*	*	*	*	*	*	*	*	*	*	*	*	*	*	*	*	*	*	*	*	*	*	*	*	*	*
23	Quintana Roo	4	Othón P. Blanco	2678	El Higuero	885005	185955	92	6	*	*	*	*	*	*	*	*	*	*	*	*	*	*	*	*	*	*	*	*	*	*	*	*	*	*	*	*	*	*	*	*	*	*	*	*	*	*	*	*
23	Quintana Roo	4	Othón P. Blanco	2679	Honorio González	884200	181534	40	1	*	*	*	*	*	*	*	*	*	*	*	*	*	*	*	*	*	*	*	*	*	*	*	*	*	*	*	*	*	*	*	*	*	*	*	*	*	*	*	*
23	Quintana Roo	4	Othón P. Blanco	2682	Las Isabelas	883315	184719	20	2	*	*	*	*	*	*	*	*	*	*	*	*	*	*	*	*	*	*	*	*	*	*	*	*	*	*	*	*	*	*	*	*	*	*	*	*	*	*	*	*
23	Quintana Roo	4	Othón P. Blanco	2683	Isidro Navarrete	884008	181255	39	4	*	*	*	*	*	*	*	*	*	*	*	*	*	*	*	*	*	*	*	*	*	*	*	*	*	*	*	*	*	*	*	*	*	*	*	*	*	*	*	*
23	Quintana Roo	4	Othón P. Blanco	2685	Los Jardines	881548	183736	10	2	*	*	*	*	*	*	*	*	*	*	*	*	*	*	*	*	*	*	*	*	*	*	*	*	*	*	*	*	*	*	*	*	*	*	*	*	*	*	*	*
23	Quintana Roo	4	Othón P. Blanco	2691	Kilómetro Seis Punto Cinco	881521	183639	10	2	*	*	*	*	*	*	*	*	*	*	*	*	*	*	*	*	*	*	*	*	*	*	*	*	*	*	*	*	*	*	*	*	*	*	*	*	*	*	*	*
23	Quintana Roo	4	Othón P. Blanco	2692	Kin-Ha	881258	184427	5	1	*	*	*	*	*	*	*	*	*	*	*	*	*	*	*	*	*	*	*	*	*	*	*	*	*	*	*	*	*	*	*	*	*	*	*	*	*	*	*	*
23	Quintana Roo	4	Othón P. Blanco	2693	Langosteros del Caribe	874330	184408	8	1	*	*	*	*	*	*	*	*	*	*	*	*	*	*	*	*	*	*	*	*	*	*	*	*	*	*	*	*	*	*	*	*	*	*	*	*	*	*	*	*
23	Quintana Roo	4	Othón P. Blanco	2694	Lanschu	874850	182024	1	4	*	*	*	*	*	*	*	*	*	*	*	*	*	*	*	*	*	*	*	*	*	*	*	*	*	*	*	*	*	*	*	*	*	*	*	*	*	*	*	*
23	Quintana Roo	4	Othón P. Blanco	2695	Los Laureles	881148	190529	19	1	*	*	*	*	*	*	*	*	*	*	*	*	*	*	*	*	*	*	*	*	*	*	*	*	*	*	*	*	*	*	*	*	*	*	*	*	*	*	*	*
23	Quintana Roo	4	Othón P. Blanco	2696	Ninguno	880635	190227	10	4	*	*	*	*	*	*	*	*	*	*	*	*	*	*	*	*	*	*	*	*	*	*	*	*	*	*	*	*	*	*	*	*	*	*	*	*	*	*	*	*
23	Quintana Roo	4	Othón P. Blanco	2697	Ninguno	880904	190200	15	6	*	*	*	*	*	*	*	*	*	*	*	*	*	*	*	*	*	*	*	*	*	*	*	*	*	*	*	*	*	*	*	*	*	*	*	*	*	*	*	*
23	Quintana Roo	4	Othón P. Blanco	2698	Ninguno	875110	181804	1	8	*	*	*	*	*	*	*	*	*	*	*	*	*	*	*	*	*	*	*	*	*	*	*	*	*	*	*	*	*	*	*	*	*	*	*	*	*	*	*	*
23	Quintana Roo	4	Othón P. Blanco	2701	Ninguno	883325	185038	20	3	*	*	*	*	*	*	*	*	*	*	*	*	*	*	*	*	*	*	*	*	*	*	*	*	*	*	*	*	*	*	*	*	*	*	*	*	*	*	*	*
23	Quintana Roo	4	Othón P. Blanco	2705	Ninguno	882319	184214	20	1	*	*	*	*	*	*	*	*	*	*	*	*	*	*	*	*	*	*	*	*	*	*	*	*	*	*	*	*	*	*	*	*	*	*	*	*	*	*	*	*
23	Quintana Roo	4	Othón P. Blanco	2707	Ninguno	883015	184549	23	4	*	*	*	*	*	*	*	*	*	*	*	*	*	*	*	*	*	*	*	*	*	*	*	*	*	*	*	*	*	*	*	*	*	*	*	*	*	*	*	*
23	Quintana Roo	4	Othón P. Blanco	2709	Ninguno	882524	184309	30	2	*	*	*	*	*	*	*	*	*	*	*	*	*	*	*	*	*	*	*	*	*	*	*	*	*	*	*	*	*	*	*	*	*	*	*	*	*	*	*	*
23	Quintana Roo	4	Othón P. Blanco	2715	Ninguno	885655	182737	107	4	*	*	*	*	*	*	*	*	*	*	*	*	*	*	*	*	*	*	*	*	*	*	*	*	*	*	*	*	*	*	*	*	*	*	*	*	*	*	*	*
23	Quintana Roo	4	Othón P. Blanco	2720	Ninguno	885845	183355	111	1	*	*	*	*	*	*	*	*	*	*	*	*	*	*	*	*	*	*	*	*	*	*	*	*	*	*	*	*	*	*	*	*	*	*	*	*	*	*	*	*
23	Quintana Roo	4	Othón P. Blanco	2721	Ninguno	890449	182803	116	1	*	*	*	*	*	*	*	*	*	*	*	*	*	*	*	*	*	*	*	*	*	*	*	*	*	*	*	*	*	*	*	*	*	*	*	*	*	*	*	*
23	Quintana Roo	4	Othón P. Blanco	2722	Ninguno	883032	183255	42	2	*	*	*	*	*	*	*	*	*	*	*	*	*	*	*	*	*	*	*	*	*	*	*	*	*	*	*	*	*	*	*	*	*	*	*	*	*	*	*	*
23	Quintana Roo	4	Othón P. Blanco	2732	Ninguno	884940	182845	100	3	*	*	*	*	*	*	*	*	*	*	*	*	*	*	*	*	*	*	*	*	*	*	*	*	*	*	*	*	*	*	*	*	*	*	*	*	*	*	*	*
23	Quintana Roo	4	Othón P. Blanco	2733	Ninguno	883315	182321	36	5	*	*	*	*	*	*	*	*	*	*	*	*	*	*	*	*	*	*	*	*	*	*	*	*	*	*	*	*	*	*	*	*	*	*	*	*	*	*	*	*
23	Quintana Roo	4	Othón P. Blanco	2735	Ninguno	885033	181928	80	1	*	*	*	*	*	*	*	*	*	*	*	*	*	*	*	*	*	*	*	*	*	*	*	*	*	*	*	*	*	*	*	*	*	*	*	*	*	*	*	*
23	Quintana Roo	4	Othón P. Blanco	2737	Ninguno	881542	183346	10	5	*	*	*	*	*	*	*	*	*	*	*	*	*	*	*	*	*	*	*	*	*	*	*	*	*	*	*	*	*	*	*	*	*	*	*	*	*	*	*	*
23	Quintana Roo	4	Othón P. Blanco	2738	Ninguno	881411	183506	10	2	*	*	*	*	*	*	*	*	*	*	*	*	*	*	*	*	*	*	*	*	*	*	*	*	*	*	*	*	*	*	*	*	*	*	*	*	*	*	*	*
23	Quintana Roo	4	Othón P. Blanco	2740	La Loma	880943	190628	19	1	*	*	*	*	*	*	*	*	*	*	*	*	*	*	*	*	*	*	*	*	*	*	*	*	*	*	*	*	*	*	*	*	*	*	*	*	*	*	*	*
23	Quintana Roo	4	Othón P. Blanco	2742	La Lulita	883049	183340	42	2	*	*	*	*	*	*	*	*	*	*	*	*	*	*	*	*	*	*	*	*	*	*	*	*	*	*	*	*	*	*	*	*	*	*	*	*	*	*	*	*
23	Quintana Roo	4	Othón P. Blanco	2743	Luz Balam	885920	183145	100	2	*	*	*	*	*	*	*	*	*	*	*	*	*	*	*	*	*	*	*	*	*	*	*	*	*	*	*	*	*	*	*	*	*	*	*	*	*	*	*	*
23	Quintana Roo	4	Othón P. Blanco	2744	Marlboro	880449	185846	10	1	*	*	*	*	*	*	*	*	*	*	*	*	*	*	*	*	*	*	*	*	*	*	*	*	*	*	*	*	*	*	*	*	*	*	*	*	*	*	*	*
23	Quintana Roo	4	Othón P. Blanco	2745	Los Mangos	885315	182738	80	11	6	5	0	0	0	11	6	5	11	6	5	8	5	3	7	4	3	6	3	3	0	0	0	3	1	2	1	1	0	1	1	0	1	1	0	0	0	0	3	0
23	Quintana Roo	4	Othón P. Blanco	2747	Manuel Interian	883151	183710	41	1	*	*	*	*	*	*	*	*	*	*	*	*	*	*	*	*	*	*	*	*	*	*	*	*	*	*	*	*	*	*	*	*	*	*	*	*	*	*	*	*
23	Quintana Roo	4	Othón P. Blanco	2749	Maple Luna	874743	182215	1	2	*	*	*	*	*	*	*	*	*	*	*	*	*	*	*	*	*	*	*	*	*	*	*	*	*	*	*	*	*	*	*	*	*	*	*	*	*	*	*	*
23	Quintana Roo	4	Othón P. Blanco	2756	Las Mil	884347	182322	40	4	*	*	*	*	*	*	*	*	*	*	*	*	*	*	*	*	*	*	*	*	*	*	*	*	*	*	*	*	*	*	*	*	*	*	*	*	*	*	*	*
23	Quintana Roo	4	Othón P. Blanco	2760	Mirador	885610	183013	81	5	*	*	*	*	*	*	*	*	*	*	*	*	*	*	*	*	*	*	*	*	*	*	*	*	*	*	*	*	*	*	*	*	*	*	*	*	*	*	*	*
23	Quintana Roo	4	Othón P. Blanco	2762	Los Mojados	883011	183428	47	1	*	*	*	*	*	*	*	*	*	*	*	*	*	*	*	*	*	*	*	*	*	*	*	*	*	*	*	*	*	*	*	*	*	*	*	*	*	*	*	*
23	Quintana Roo	4	Othón P. Blanco	2763	Moncho	890535	182853	126	3	*	*	*	*	*	*	*	*	*	*	*	*	*	*	*	*	*	*	*	*	*	*	*	*	*	*	*	*	*	*	*	*	*	*	*	*	*	*	*	*
23	Quintana Roo	4	Othón P. Blanco	2764	El Mora	881953	183240	10	2	*	*	*	*	*	*	*	*	*	*	*	*	*	*	*	*	*	*	*	*	*	*	*	*	*	*	*	*	*	*	*	*	*	*	*	*	*	*	*	*
23	Quintana Roo	4	Othón P. Blanco	2765	El Naranjo	884856	183444	70	4	*	*	*	*	*	*	*	*	*	*	*	*	*	*	*	*	*	*	*	*	*	*	*	*	*	*	*	*	*	*	*	*	*	*	*	*	*	*	*	*
23	Quintana Roo	4	Othón P. Blanco	2767	Nido de Águila	882852	183344	31	2	*	*	*	*	*	*	*	*	*	*	*	*	*	*	*	*	*	*	*	*	*	*	*	*	*	*	*	*	*	*	*	*	*	*	*	*	*	*	*	*
23	Quintana Roo	4	Othón P. Blanco	2769	La Nueva Esperanza	882737	184448	28	59	29	30	7	3	4	52	26	26	49	25	24	28	16	12	24	13	11	23	12	11	8	3	5	16	7	9	14	6	8	4	3	1	1	1	0	5	3	2	9	4
23	Quintana Roo	4	Othón P. Blanco	2770	Las Orquídeas	884536	184609	100	1	*	*	*	*	*	*	*	*	*	*	*	*	*	*	*	*	*	*	*	*	*	*	*	*	*	*	*	*	*	*	*	*	*	*	*	*	*	*	*	*
23	Quintana Roo	4	Othón P. Blanco	2772	Pablo Moreno	881411	184330	10	1	*	*	*	*	*	*	*	*	*	*	*	*	*	*	*	*	*	*	*	*	*	*	*	*	*	*	*	*	*	*	*	*	*	*	*	*	*	*	*	*
23	Quintana Roo	4	Othón P. Blanco	2775	Partera Brava	882015	183315	10	2	*	*	*	*	*	*	*	*	*	*	*	*	*	*	*	*	*	*	*	*	*	*	*	*	*	*	*	*	*	*	*	*	*	*	*	*	*	*	*	*
23	Quintana Roo	4	Othón P. Blanco	2776	El Pensamiento	885812	182957	108	1	*	*	*	*	*	*	*	*	*	*	*	*	*	*	*	*	*	*	*	*	*	*	*	*	*	*	*	*	*	*	*	*	*	*	*	*	*	*	*	*
23	Quintana Roo	4	Othón P. Blanco	2777	La Piedra	881313	185430	10	2	*	*	*	*	*	*	*	*	*	*	*	*	*	*	*	*	*	*	*	*	*	*	*	*	*	*	*	*	*	*	*	*	*	*	*	*	*	*	*	*
23	Quintana Roo	4	Othón P. Blanco	2779	Las Piedras	884935	183217	80	1	*	*	*	*	*	*	*	*	*	*	*	*	*	*	*	*	*	*	*	*	*	*	*	*	*	*	*	*	*	*	*	*	*	*	*	*	*	*	*	*
23	Quintana Roo	4	Othón P. Blanco	2780	Los Pinos	883859	181500	55	5	*	*	*	*	*	*	*	*	*	*	*	*	*	*	*	*	*	*	*	*	*	*	*	*	*	*	*	*	*	*	*	*	*	*	*	*	*	*	*	*
23	Quintana Roo	4	Othón P. Blanco	2781	Pista Dos	884145	181600	40	3	*	*	*	*	*	*	*	*	*	*	*	*	*	*	*	*	*	*	*	*	*	*	*	*	*	*	*	*	*	*	*	*	*	*	*	*	*	*	*	*
23	Quintana Roo	4	Othón P. Blanco	2784	El Potrillo	890008	182728	149	5	*	*	*	*	*	*	*	*	*	*	*	*	*	*	*	*	*	*	*	*	*	*	*	*	*	*	*	*	*	*	*	*	*	*	*	*	*	*	*	*
23	Quintana Roo	4	Othón P. Blanco	2785	Los Potrillos	884145	182856	50	1	*	*	*	*	*	*	*	*	*	*	*	*	*	*	*	*	*	*	*	*	*	*	*	*	*	*	*	*	*	*	*	*	*	*	*	*	*	*	*	*
23	Quintana Roo	4	Othón P. Blanco	2787	Ramiro González Acotzi	882557	184327	30	1	*	*	*	*	*	*	*	*	*	*	*	*	*	*	*	*	*	*	*	*	*	*	*	*	*	*	*	*	*	*	*	*	*	*	*	*	*	*	*	*
23	Quintana Roo	4	Othón P. Blanco	2788	El Ramonal	884955	185956	88	3	*	*	*	*	*	*	*	*	*	*	*	*	*	*	*	*	*	*	*	*	*	*	*	*	*	*	*	*	*	*	*	*	*	*	*	*	*	*	*	*
23	Quintana Roo	4	Othón P. Blanco	2789	Rancho Agropecuario	884113	181409	32	2	*	*	*	*	*	*	*	*	*	*	*	*	*	*	*	*	*	*	*	*	*	*	*	*	*	*	*	*	*	*	*	*	*	*	*	*	*	*	*	*
23	Quintana Roo	4	Othón P. Blanco	2790	Rancho Aromas	874630	183354	2	5	*	*	*	*	*	*	*	*	*	*	*	*	*	*	*	*	*	*	*	*	*	*	*	*	*	*	*	*	*	*	*	*	*	*	*	*	*	*	*	*
23	Quintana Roo	4	Othón P. Blanco	2791	Rancho Arrayanes	884053	181448	33	3	*	*	*	*	*	*	*	*	*	*	*	*	*	*	*	*	*	*	*	*	*	*	*	*	*	*	*	*	*	*	*	*	*	*	*	*	*	*	*	*
23	Quintana Roo	4	Othón P. Blanco	2793	Rancho Cholo	885711	182910	91	1	*	*	*	*	*	*	*	*	*	*	*	*	*	*	*	*	*	*	*	*	*	*	*	*	*	*	*	*	*	*	*	*	*	*	*	*	*	*	*	*
23	Quintana Roo	4	Othón P. Blanco	2794	Rancho Dindin	884307	182328	40	2	*	*	*	*	*	*	*	*	*	*	*	*	*	*	*	*	*	*	*	*	*	*	*	*	*	*	*	*	*	*	*	*	*	*	*	*	*	*	*	*
23	Quintana Roo	4	Othón P. Blanco	2795	Rancho Grande	884445	185634	90	4	*	*	*	*	*	*	*	*	*	*	*	*	*	*	*	*	*	*	*	*	*	*	*	*	*	*	*	*	*	*	*	*	*	*	*	*	*	*	*	*
23	Quintana Roo	4	Othón P. Blanco	2796	Rancho Milagros	884615	181843	51	1	*	*	*	*	*	*	*	*	*	*	*	*	*	*	*	*	*	*	*	*	*	*	*	*	*	*	*	*	*	*	*	*	*	*	*	*	*	*	*	*
23	Quintana Roo	4	Othón P. Blanco	2797	Rancho Oxtanka	881345	183554	10	1	*	*	*	*	*	*	*	*	*	*	*	*	*	*	*	*	*	*	*	*	*	*	*	*	*	*	*	*	*	*	*	*	*	*	*	*	*	*	*	*
23	Quintana Roo	4	Othón P. Blanco	2798	Rancho Pedregal	884300	181640	45	1	*	*	*	*	*	*	*	*	*	*	*	*	*	*	*	*	*	*	*	*	*	*	*	*	*	*	*	*	*	*	*	*	*	*	*	*	*	*	*	*
23	Quintana Roo	4	Othón P. Blanco	2800	Recicladora	881555	183318	10	2	*	*	*	*	*	*	*	*	*	*	*	*	*	*	*	*	*	*	*	*	*	*	*	*	*	*	*	*	*	*	*	*	*	*	*	*	*	*	*	*
23	Quintana Roo	4	Othón P. Blanco	2802	El Remolino	884115	185012	70	1	*	*	*	*	*	*	*	*	*	*	*	*	*	*	*	*	*	*	*	*	*	*	*	*	*	*	*	*	*	*	*	*	*	*	*	*	*	*	*	*
23	Quintana Roo	4	Othón P. Blanco	2803	La Retranca	881053	190637	19	1	*	*	*	*	*	*	*	*	*	*	*	*	*	*	*	*	*	*	*	*	*	*	*	*	*	*	*	*	*	*	*	*	*	*	*	*	*	*	*	*
23	Quintana Roo	4	Othón P. Blanco	2805	Roberto Rodríguez	874423	183502	1	3	*	*	*	*	*	*	*	*	*	*	*	*	*	*	*	*	*	*	*	*	*	*	*	*	*	*	*	*	*	*	*	*	*	*	*	*	*	*	*	*
23	Quintana Roo	4	Othón P. Blanco	2806	Rosa Gómez	882920	183346	50	1	*	*	*	*	*	*	*	*	*	*	*	*	*	*	*	*	*	*	*	*	*	*	*	*	*	*	*	*	*	*	*	*	*	*	*	*	*	*	*	*
23	Quintana Roo	4	Othón P. Blanco	2807	La Rosita	883950	181543	40	5	*	*	*	*	*	*	*	*	*	*	*	*	*	*	*	*	*	*	*	*	*	*	*	*	*	*	*	*	*	*	*	*	*	*	*	*	*	*	*	*
23	Quintana Roo	4	Othón P. Blanco	2808	Samaritana	880243	185834	10	1	*	*	*	*	*	*	*	*	*	*	*	*	*	*	*	*	*	*	*	*	*	*	*	*	*	*	*	*	*	*	*	*	*	*	*	*	*	*	*	*
23	Quintana Roo	4	Othón P. Blanco	2811	San Felipe	883037	183121	21	2	*	*	*	*	*	*	*	*	*	*	*	*	*	*	*	*	*	*	*	*	*	*	*	*	*	*	*	*	*	*	*	*	*	*	*	*	*	*	*	*
23	Quintana Roo	4	Othón P. Blanco	2812	San Francisco	874326	184020	1	5	*	*	*	*	*	*	*	*	*	*	*	*	*	*	*	*	*	*	*	*	*	*	*	*	*	*	*	*	*	*	*	*	*	*	*	*	*	*	*	*
23	Quintana Roo	4	Othón P. Blanco	2814	San Jorge	881857	183504	10	1	*	*	*	*	*	*	*	*	*	*	*	*	*	*	*	*	*	*	*	*	*	*	*	*	*	*	*	*	*	*	*	*	*	*	*	*	*	*	*	*
23	Quintana Roo	4	Othón P. Blanco	2816	San José	882731	183656	20	1	*	*	*	*	*	*	*	*	*	*	*	*	*	*	*	*	*	*	*	*	*	*	*	*	*	*	*	*	*	*	*	*	*	*	*	*	*	*	*	*
23	Quintana Roo	4	Othón P. Blanco	2817	San José de la Cruz	884910	191344	60	13	*	*	*	*	*	*	*	*	*	*	*	*	*	*	*	*	*	*	*	*	*	*	*	*	*	*	*	*	*	*	*	*	*	*	*	*	*	*	*	*
23	Quintana Roo	4	Othón P. Blanco	2818	San Judas Tadeo	883418	191024	30	5	*	*	*	*	*	*	*	*	*	*	*	*	*	*	*	*	*	*	*	*	*	*	*	*	*	*	*	*	*	*	*	*	*	*	*	*	*	*	*	*
23	Quintana Roo	4	Othón P. Blanco	2819	San Judas Tadeo	881602	183915	10	1	*	*	*	*	*	*	*	*	*	*	*	*	*	*	*	*	*	*	*	*	*	*	*	*	*	*	*	*	*	*	*	*	*	*	*	*	*	*	*	*
23	Quintana Roo	4	Othón P. Blanco	2820	San Lázaro	883926	181304	64	1	*	*	*	*	*	*	*	*	*	*	*	*	*	*	*	*	*	*	*	*	*	*	*	*	*	*	*	*	*	*	*	*	*	*	*	*	*	*	*	*
23	Quintana Roo	4	Othón P. Blanco	2824	San Víctor	884404	184701	90	1	*	*	*	*	*	*	*	*	*	*	*	*	*	*	*	*	*	*	*	*	*	*	*	*	*	*	*	*	*	*	*	*	*	*	*	*	*	*	*	*
23	Quintana Roo	4	Othón P. Blanco	2825	Santa Julia	883327	184739	20	2	*	*	*	*	*	*	*	*	*	*	*	*	*	*	*	*	*	*	*	*	*	*	*	*	*	*	*	*	*	*	*	*	*	*	*	*	*	*	*	*
23	Quintana Roo	4	Othón P. Blanco	2826	Santa Rita	884217	185138	58	2	*	*	*	*	*	*	*	*	*	*	*	*	*	*	*	*	*	*	*	*	*	*	*	*	*	*	*	*	*	*	*	*	*	*	*	*	*	*	*	*
23	Quintana Roo	4	Othón P. Blanco	2827	Santa Rita	881814	184840	20	3	*	*	*	*	*	*	*	*	*	*	*	*	*	*	*	*	*	*	*	*	*	*	*	*	*	*	*	*	*	*	*	*	*	*	*	*	*	*	*	*
23	Quintana Roo	4	Othón P. Blanco	2829	Los Sauces	884030	181517	40	1	*	*	*	*	*	*	*	*	*	*	*	*	*	*	*	*	*	*	*	*	*	*	*	*	*	*	*	*	*	*	*	*	*	*	*	*	*	*	*	*
23	Quintana Roo	4	Othón P. Blanco	2831	Sinaí	874639	183248	2	3	*	*	*	*	*	*	*	*	*	*	*	*	*	*	*	*	*	*	*	*	*	*	*	*	*	*	*	*	*	*	*	*	*	*	*	*	*	*	*	*
23	Quintana Roo	4	Othón P. Blanco	2833	Los Socios	883309	184652	20	3	*	*	*	*	*	*	*	*	*	*	*	*	*	*	*	*	*	*	*	*	*	*	*	*	*	*	*	*	*	*	*	*	*	*	*	*	*	*	*	*
23	Quintana Roo	4	Othón P. Blanco	2835	El Sufrido	883014	184546	23	3	*	*	*	*	*	*	*	*	*	*	*	*	*	*	*	*	*	*	*	*	*	*	*	*	*	*	*	*	*	*	*	*	*	*	*	*	*	*	*	*
23	Quintana Roo	4	Othón P. Blanco	2836	Thako	883019	183724	45	4	*	*	*	*	*	*	*	*	*	*	*	*	*	*	*	*	*	*	*	*	*	*	*	*	*	*	*	*	*	*	*	*	*	*	*	*	*	*	*	*
23	Quintana Roo	4	Othón P. Blanco	2837	Las Tres Cruces	885255	175449	20	5	*	*	*	*	*	*	*	*	*	*	*	*	*	*	*	*	*	*	*	*	*	*	*	*	*	*	*	*	*	*	*	*	*	*	*	*	*	*	*	*
23	Quintana Roo	4	Othón P. Blanco	2838	Los Tres Gómez	881626	184211	20	1	*	*	*	*	*	*	*	*	*	*	*	*	*	*	*	*	*	*	*	*	*	*	*	*	*	*	*	*	*	*	*	*	*	*	*	*	*	*	*	*
23	Quintana Roo	4	Othón P. Blanco	2839	Los Tres Valles	881533	183513	10	3	*	*	*	*	*	*	*	*	*	*	*	*	*	*	*	*	*	*	*	*	*	*	*	*	*	*	*	*	*	*	*	*	*	*	*	*	*	*	*	*
23	Quintana Roo	4	Othón P. Blanco	2841	El Tucán de Sacxán	883113	182912	38	4	*	*	*	*	*	*	*	*	*	*	*	*	*	*	*	*	*	*	*	*	*	*	*	*	*	*	*	*	*	*	*	*	*	*	*	*	*	*	*	*
23	Quintana Roo	4	Othón P. Blanco	2842	Tumben Kajtal	881627	183717	10	3	*	*	*	*	*	*	*	*	*	*	*	*	*	*	*	*	*	*	*	*	*	*	*	*	*	*	*	*	*	*	*	*	*	*	*	*	*	*	*	*
23	Quintana Roo	4	Othón P. Blanco	2845	Veinticuatro de Julio	885830	183350	119	3	*	*	*	*	*	*	*	*	*	*	*	*	*	*	*	*	*	*	*	*	*	*	*	*	*	*	*	*	*	*	*	*	*	*	*	*	*	*	*	*
23	Quintana Roo	4	Othón P. Blanco	2846	Vermen	884854	183458	70	2	*	*	*	*	*	*	*	*	*	*	*	*	*	*	*	*	*	*	*	*	*	*	*	*	*	*	*	*	*	*	*	*	*	*	*	*	*	*	*	*
23	Quintana Roo	4	Othón P. Blanco	2847	Villa Águila	875003	181711	0	2	*	*	*	*	*	*	*	*	*	*	*	*	*	*	*	*	*	*	*	*	*	*	*	*	*	*	*	*	*	*	*	*	*	*	*	*	*	*	*	*
23	Quintana Roo	4	Othón P. Blanco	2849	Villa Cariño	874341	184551	1	3	*	*	*	*	*	*	*	*	*	*	*	*	*	*	*	*	*	*	*	*	*	*	*	*	*	*	*	*	*	*	*	*	*	*	*	*	*	*	*	*
23	Quintana Roo	4	Othón P. Blanco	2850	Villa Esmeralda	881335	183640	10	2	*	*	*	*	*	*	*	*	*	*	*	*	*	*	*	*	*	*	*	*	*	*	*	*	*	*	*	*	*	*	*	*	*	*	*	*	*	*	*	*
23	Quintana Roo	4	Othón P. Blanco	2852	Villa Tamar	881337	183607	2	4	*	*	*	*	*	*	*	*	*	*	*	*	*	*	*	*	*	*	*	*	*	*	*	*	*	*	*	*	*	*	*	*	*	*	*	*	*	*	*	*
23	Quintana Roo	4	Othón P. Blanco	2860	La Zarza	884229	184809	90	4	*	*	*	*	*	*	*	*	*	*	*	*	*	*	*	*	*	*	*	*	*	*	*	*	*	*	*	*	*	*	*	*	*	*	*	*	*	*	*	*
23	Quintana Roo	4	Othón P. Blanco	2861	El Zaspa	880255	185835	10	7	*	*	*	*	*	*	*	*	*	*	*	*	*	*	*	*	*	*	*	*	*	*	*	*	*	*	*	*	*	*	*	*	*	*	*	*	*	*	*	*
23	Quintana Roo	4	Othón P. Blanco	9998	Localidades de una vivienda				1530	931	599	81	45	36	1437	879	558	1380	846	534	1222	761	461	1166	731	435	1095	696	399	86	51	35	129	67	62	147	77	70	56	30	26	71	35	36	188	94	94	340	225
23	Quintana Roo	4	Othón P. Blanco	9999	Localidades de dos viviendas				371	197	174	22	8	14	349	189	160	336	184	152	278	153	125	248	139	109	230	130	100	19	8	11	52	28	24	63	30	33	30	14	16	18	9	9	44	26	18	80	36
23	Quintana Roo	5	Benito Juárez	0	Total del Municipio				661176	334945	326231	38348	19621	18727	609617	308666	300951	583009	295152	287857	498351	252160	246191	463937	234739	229198	427242	216208	211034	38989	19853	19136	72277	36653	35624	82261	41802	40459	34414	17421	16993	36695	18531	18164	92136	46786	45350	196316	25724
23	Quintana Roo	5	Benito Juárez	1	Cancún	865051	210938	10	628306	317990	310316	36275	18523	17752	580171	293493	286678	555047	280717	274330	475033	240046	234987	442483	223595	218888	407679	206079	201600	36817	18759	18058	68321	34688	33633	77824	39545	38279	32550	16451	16099	34804	17516	17288	87590	44435	43155	187607	24227
23	Quintana Roo	5	Benito Juárez	2	Alfredo V. Bonfil	865105	210457	10	14900	7639	7261	951	501	450	13114	6716	6398	12407	6355	6052	10346	5319	5027	9496	4881	4615	8599	4405	4194	1040	535	505	1728	862	866	1964	1006	958	850	438	412	897	476	421	2191	1139	1052	4004	520
23	Quintana Roo	5	Benito Juárez	3	Leona Vicario	871210	205932	10	6517	3366	3151	429	241	188	5940	3052	2888	5622	2903	2719	4581	2368	2213	4154	2135	2019	3720	1905	1815	444	220	224	915	464	451	1040	542	498	427	233	194	434	230	204	870	441	429	1623	435
23	Quintana Roo	5	Benito Juárez	5	Central Vallarta	870249	205145	8	20	12	8	0	0	0	17	10	7	17	10	7	17	10	7	16	9	7	14	8	6	0	0	0	0	0	0	1	1	0	1	1	0	2	1	1	2	1	1	7	1
23	Quintana Roo	5	Benito Juárez	16	Candelaria (Santa Julia)	870428	210257	6	4	*	*	*	*	*	*	*	*	*	*	*	*	*	*	*	*	*	*	*	*	*	*	*	*	*	*	*	*	*	*	*	*	*	*	*	*	*	*	*	*
23	Quintana Roo	5	Benito Juárez	23	Los Compadres	871649	205729	10	1	*	*	*	*	*	*	*	*	*	*	*	*	*	*	*	*	*	*	*	*	*	*	*	*	*	*	*	*	*	*	*	*	*	*	*	*	*	*	*	*
23	Quintana Roo	5	Benito Juárez	24	Puerto Morelos	865355	205113	4	9188	4667	4521	559	294	265	8326	4216	4110	7956	4031	3925	6711	3449	3262	6274	3234	3040	5823	2995	2828	561	274	287	1054	493	561	1112	530	582	437	215	222	451	239	212	1245	646	599	2582	377
23	Quintana Roo	5	Benito Juárez	69	Rancho del General	870806	211243	10	3	*	*	*	*	*	*	*	*	*	*	*	*	*	*	*	*	*	*	*	*	*	*	*	*	*	*	*	*	*	*	*	*	*	*	*	*	*	*	*	*
23	Quintana Roo	5	Benito Juárez	73	Nava	865958	210515	9	2	*	*	*	*	*	*	*	*	*	*	*	*	*	*	*	*	*	*	*	*	*	*	*	*	*	*	*	*	*	*	*	*	*	*	*	*	*	*	*	*
23	Quintana Roo	5	Benito Juárez	79	Santa María	871037	210650	7	3	*	*	*	*	*	*	*	*	*	*	*	*	*	*	*	*	*	*	*	*	*	*	*	*	*	*	*	*	*	*	*	*	*	*	*	*	*	*	*	*
23	Quintana Roo	5	Benito Juárez	95	La Carmelita	870940	211057	5	3	*	*	*	*	*	*	*	*	*	*	*	*	*	*	*	*	*	*	*	*	*	*	*	*	*	*	*	*	*	*	*	*	*	*	*	*	*	*	*	*
23	Quintana Roo	5	Benito Juárez	97	Los Castillo	870253	210338	6	2	*	*	*	*	*	*	*	*	*	*	*	*	*	*	*	*	*	*	*	*	*	*	*	*	*	*	*	*	*	*	*	*	*	*	*	*	*	*	*	*
23	Quintana Roo	5	Benito Juárez	104	San Jorge	870511	211040	7	1	*	*	*	*	*	*	*	*	*	*	*	*	*	*	*	*	*	*	*	*	*	*	*	*	*	*	*	*	*	*	*	*	*	*	*	*	*	*	*	*
23	Quintana Roo	5	Benito Juárez	123	Las Hadas	865953	210515	10	2	*	*	*	*	*	*	*	*	*	*	*	*	*	*	*	*	*	*	*	*	*	*	*	*	*	*	*	*	*	*	*	*	*	*	*	*	*	*	*	*
23	Quintana Roo	5	Benito Juárez	126	La Ilusión	865928	210529	10	13	*	*	*	*	*	*	*	*	*	*	*	*	*	*	*	*	*	*	*	*	*	*	*	*	*	*	*	*	*	*	*	*	*	*	*	*	*	*	*	*
23	Quintana Roo	5	Benito Juárez	129	Los Íñigo	865921	210531	10	5	*	*	*	*	*	*	*	*	*	*	*	*	*	*	*	*	*	*	*	*	*	*	*	*	*	*	*	*	*	*	*	*	*	*	*	*	*	*	*	*
23	Quintana Roo	5	Benito Juárez	135	Marbat	865148	205744	7	2	*	*	*	*	*	*	*	*	*	*	*	*	*	*	*	*	*	*	*	*	*	*	*	*	*	*	*	*	*	*	*	*	*	*	*	*	*	*	*	*
23	Quintana Roo	5	Benito Juárez	145	Paraíso	865527	205111	5	8	*	*	*	*	*	*	*	*	*	*	*	*	*	*	*	*	*	*	*	*	*	*	*	*	*	*	*	*	*	*	*	*	*	*	*	*	*	*	*	*
23	Quintana Roo	5	Benito Juárez	158	Alicia	865912	210536	10	2	*	*	*	*	*	*	*	*	*	*	*	*	*	*	*	*	*	*	*	*	*	*	*	*	*	*	*	*	*	*	*	*	*	*	*	*	*	*	*	*
23	Quintana Roo	5	Benito Juárez	160	Los Olmos	865845	210557	10	12	*	*	*	*	*	*	*	*	*	*	*	*	*	*	*	*	*	*	*	*	*	*	*	*	*	*	*	*	*	*	*	*	*	*	*	*	*	*	*	*
23	Quintana Roo	5	Benito Juárez	167	San Miguel	865135	205843	6	5	*	*	*	*	*	*	*	*	*	*	*	*	*	*	*	*	*	*	*	*	*	*	*	*	*	*	*	*	*	*	*	*	*	*	*	*	*	*	*	*
23	Quintana Roo	5	Benito Juárez	173	San Antonio	870135	211037	7	4	*	*	*	*	*	*	*	*	*	*	*	*	*	*	*	*	*	*	*	*	*	*	*	*	*	*	*	*	*	*	*	*	*	*	*	*	*	*	*	*
23	Quintana Roo	5	Benito Juárez	183	El Tucán	870418	211040	6	1	*	*	*	*	*	*	*	*	*	*	*	*	*	*	*	*	*	*	*	*	*	*	*	*	*	*	*	*	*	*	*	*	*	*	*	*	*	*	*	*
23	Quintana Roo	5	Benito Juárez	184	Los Vargas	870525	211004	7	2	*	*	*	*	*	*	*	*	*	*	*	*	*	*	*	*	*	*	*	*	*	*	*	*	*	*	*	*	*	*	*	*	*	*	*	*	*	*	*	*
23	Quintana Roo	5	Benito Juárez	193	El Tiro Fijo	870335	210325	6	4	*	*	*	*	*	*	*	*	*	*	*	*	*	*	*	*	*	*	*	*	*	*	*	*	*	*	*	*	*	*	*	*	*	*	*	*	*	*	*	*
23	Quintana Roo	5	Benito Juárez	196	Chilly Willys	865645	210655	10	6	*	*	*	*	*	*	*	*	*	*	*	*	*	*	*	*	*	*	*	*	*	*	*	*	*	*	*	*	*	*	*	*	*	*	*	*	*	*	*	*
23	Quintana Roo	5	Benito Juárez	201	Kilómetro Trescientos Tres	865740	210628	10	3	*	*	*	*	*	*	*	*	*	*	*	*	*	*	*	*	*	*	*	*	*	*	*	*	*	*	*	*	*	*	*	*	*	*	*	*	*	*	*	*
23	Quintana Roo	5	Benito Juárez	202	Las Arboledas	865631	210713	10	42	22	20	2	1	1	34	18	16	34	18	16	31	15	16	28	14	14	25	11	14	0	0	0	3	3	0	4	2	2	3	1	2	3	3	0	3	3	0	11	3
23	Quintana Roo	5	Benito Juárez	207	Huertos del Ramonal	865759	210633	10	2	*	*	*	*	*	*	*	*	*	*	*	*	*	*	*	*	*	*	*	*	*	*	*	*	*	*	*	*	*	*	*	*	*	*	*	*	*	*	*	*
23	Quintana Roo	5	Benito Juárez	210	Estrellas de la Noche (Kilómetro Veintiuno)	865819	210602	10	5	*	*	*	*	*	*	*	*	*	*	*	*	*	*	*	*	*	*	*	*	*	*	*	*	*	*	*	*	*	*	*	*	*	*	*	*	*	*	*	*
23	Quintana Roo	5	Benito Juárez	211	El Colís	865839	210549	10	1	*	*	*	*	*	*	*	*	*	*	*	*	*	*	*	*	*	*	*	*	*	*	*	*	*	*	*	*	*	*	*	*	*	*	*	*	*	*	*	*
23	Quintana Roo	5	Benito Juárez	229	San José (La Gota de Oro)	865944	210516	10	20	14	6	1	1	0	19	13	6	17	11	6	12	8	4	11	8	3	11	8	3	4	2	2	3	3	0	3	2	1	1	0	1	0	0	0	1	1	0	2	3
23	Quintana Roo	5	Benito Juárez	234	Los Dos Hermanos J. y J.	865944	210519	10	6	*	*	*	*	*	*	*	*	*	*	*	*	*	*	*	*	*	*	*	*	*	*	*	*	*	*	*	*	*	*	*	*	*	*	*	*	*	*	*	*
23	Quintana Roo	5	Benito Juárez	236	Las Pollitas	870315	210334	6	3	*	*	*	*	*	*	*	*	*	*	*	*	*	*	*	*	*	*	*	*	*	*	*	*	*	*	*	*	*	*	*	*	*	*	*	*	*	*	*	*
23	Quintana Roo	5	Benito Juárez	237	Bosques del Caribe	865825	210626	10	41	22	19	0	0	0	41	22	19	40	21	19	37	20	17	35	18	17	33	16	17	1	1	0	3	1	2	3	2	1	2	2	0	2	2	0	5	0	5	11	5
23	Quintana Roo	5	Benito Juárez	243	Avance Agroindustrial	865935	210520	10	8	*	*	*	*	*	*	*	*	*	*	*	*	*	*	*	*	*	*	*	*	*	*	*	*	*	*	*	*	*	*	*	*	*	*	*	*	*	*	*	*
23	Quintana Roo	5	Benito Juárez	261	Benito Juárez	870051	210446	8	4	*	*	*	*	*	*	*	*	*	*	*	*	*	*	*	*	*	*	*	*	*	*	*	*	*	*	*	*	*	*	*	*	*	*	*	*	*	*	*	*
23	Quintana Roo	5	Benito Juárez	291	Villas de Mora	865042	210347	10	13	7	6	0	0	0	10	6	4	10	6	4	7	4	3	6	3	3	5	2	3	0	0	0	3	2	1	3	2	1	1	1	0	1	1	0	0	0	0	3	1
23	Quintana Roo	5	Benito Juárez	305	El Orgullo	870207	210408	6	1	*	*	*	*	*	*	*	*	*	*	*	*	*	*	*	*	*	*	*	*	*	*	*	*	*	*	*	*	*	*	*	*	*	*	*	*	*	*	*	*
23	Quintana Roo	5	Benito Juárez	318	Pedro Marrufo Silva [Lienzo Charro]	865058	210216	10	2	*	*	*	*	*	*	*	*	*	*	*	*	*	*	*	*	*	*	*	*	*	*	*	*	*	*	*	*	*	*	*	*	*	*	*	*	*	*	*	*
23	Quintana Roo	5	Benito Juárez	336	Petempich	865153	205742	7	2	*	*	*	*	*	*	*	*	*	*	*	*	*	*	*	*	*	*	*	*	*	*	*	*	*	*	*	*	*	*	*	*	*	*	*	*	*	*	*	*
23	Quintana Roo	5	Benito Juárez	339	San José de los Camotes	865217	205552	6	5	*	*	*	*	*	*	*	*	*	*	*	*	*	*	*	*	*	*	*	*	*	*	*	*	*	*	*	*	*	*	*	*	*	*	*	*	*	*	*	*
23	Quintana Roo	5	Benito Juárez	354	El Jabalí	870518	211155	10	14	*	*	*	*	*	*	*	*	*	*	*	*	*	*	*	*	*	*	*	*	*	*	*	*	*	*	*	*	*	*	*	*	*	*	*	*	*	*	*	*
23	Quintana Roo	5	Benito Juárez	357	El Ana Bárbara	870518	211203	10	2	*	*	*	*	*	*	*	*	*	*	*	*	*	*	*	*	*	*	*	*	*	*	*	*	*	*	*	*	*	*	*	*	*	*	*	*	*	*	*	*
23	Quintana Roo	5	Benito Juárez	369	San Carlos	870154	211036	6	1	*	*	*	*	*	*	*	*	*	*	*	*	*	*	*	*	*	*	*	*	*	*	*	*	*	*	*	*	*	*	*	*	*	*	*	*	*	*	*	*
23	Quintana Roo	5	Benito Juárez	376	Los Girasoles	870519	210658	6	4	*	*	*	*	*	*	*	*	*	*	*	*	*	*	*	*	*	*	*	*	*	*	*	*	*	*	*	*	*	*	*	*	*	*	*	*	*	*	*	*
23	Quintana Roo	5	Benito Juárez	386	San Jarifongo	870159	205146	9	1	*	*	*	*	*	*	*	*	*	*	*	*	*	*	*	*	*	*	*	*	*	*	*	*	*	*	*	*	*	*	*	*	*	*	*	*	*	*	*	*
23	Quintana Roo	5	Benito Juárez	392	Crococún	865313	205248	3	1	*	*	*	*	*	*	*	*	*	*	*	*	*	*	*	*	*	*	*	*	*	*	*	*	*	*	*	*	*	*	*	*	*	*	*	*	*	*	*	*
23	Quintana Roo	5	Benito Juárez	440	Divino Redentor	865940	210521	10	2	*	*	*	*	*	*	*	*	*	*	*	*	*	*	*	*	*	*	*	*	*	*	*	*	*	*	*	*	*	*	*	*	*	*	*	*	*	*	*	*
23	Quintana Roo	5	Benito Juárez	441	Ninguno	865938	210530	10	3	*	*	*	*	*	*	*	*	*	*	*	*	*	*	*	*	*	*	*	*	*	*	*	*	*	*	*	*	*	*	*	*	*	*	*	*	*	*	*	*
23	Quintana Roo	5	Benito Juárez	442	San Eduardo	870214	205142	8	5	*	*	*	*	*	*	*	*	*	*	*	*	*	*	*	*	*	*	*	*	*	*	*	*	*	*	*	*	*	*	*	*	*	*	*	*	*	*	*	*
23	Quintana Roo	5	Benito Juárez	447	Tres Bocas	870431	205222	10	2	*	*	*	*	*	*	*	*	*	*	*	*	*	*	*	*	*	*	*	*	*	*	*	*	*	*	*	*	*	*	*	*	*	*	*	*	*	*	*	*
23	Quintana Roo	5	Benito Juárez	453	Rancho Alegre	870436	205201	10	3	*	*	*	*	*	*	*	*	*	*	*	*	*	*	*	*	*	*	*	*	*	*	*	*	*	*	*	*	*	*	*	*	*	*	*	*	*	*	*	*
23	Quintana Roo	5	Benito Juárez	472	Hermanos Estrada	865846	210544	10	7	*	*	*	*	*	*	*	*	*	*	*	*	*	*	*	*	*	*	*	*	*	*	*	*	*	*	*	*	*	*	*	*	*	*	*	*	*	*	*	*
23	Quintana Roo	5	Benito Juárez	475	San Judas Tadeo	870147	210418	7	4	*	*	*	*	*	*	*	*	*	*	*	*	*	*	*	*	*	*	*	*	*	*	*	*	*	*	*	*	*	*	*	*	*	*	*	*	*	*	*	*
23	Quintana Roo	5	Benito Juárez	485	La Chaya	870704	210641	7	3	*	*	*	*	*	*	*	*	*	*	*	*	*	*	*	*	*	*	*	*	*	*	*	*	*	*	*	*	*	*	*	*	*	*	*	*	*	*	*	*
23	Quintana Roo	5	Benito Juárez	491	Víctor Encalada (La Laguna)	871629	205742	10	3	*	*	*	*	*	*	*	*	*	*	*	*	*	*	*	*	*	*	*	*	*	*	*	*	*	*	*	*	*	*	*	*	*	*	*	*	*	*	*	*
23	Quintana Roo	5	Benito Juárez	492	Emiliano Zapata	870313	210412	6	41	29	12	2	2	0	39	27	12	39	27	12	35	24	11	33	22	11	31	22	9	1	0	1	3	3	0	4	4	0	2	2	0	2	0	2	1	1	0	6	9
23	Quintana Roo	5	Benito Juárez	502	Grupo Zeta	865253	210106	10	3	*	*	*	*	*	*	*	*	*	*	*	*	*	*	*	*	*	*	*	*	*	*	*	*	*	*	*	*	*	*	*	*	*	*	*	*	*	*	*	*
23	Quintana Roo	5	Benito Juárez	503	La Guadalupana	870003	210511	9	2	*	*	*	*	*	*	*	*	*	*	*	*	*	*	*	*	*	*	*	*	*	*	*	*	*	*	*	*	*	*	*	*	*	*	*	*	*	*	*	*
23	Quintana Roo	5	Benito Juárez	509	Hermanos Martínez	870042	210446	8	5	*	*	*	*	*	*	*	*	*	*	*	*	*	*	*	*	*	*	*	*	*	*	*	*	*	*	*	*	*	*	*	*	*	*	*	*	*	*	*	*
23	Quintana Roo	5	Benito Juárez	516	Doña Marina	870020	210457	8	1	*	*	*	*	*	*	*	*	*	*	*	*	*	*	*	*	*	*	*	*	*	*	*	*	*	*	*	*	*	*	*	*	*	*	*	*	*	*	*	*
23	Quintana Roo	5	Benito Juárez	517	Cancún [Trituradora]	870010	210507	8	2	*	*	*	*	*	*	*	*	*	*	*	*	*	*	*	*	*	*	*	*	*	*	*	*	*	*	*	*	*	*	*	*	*	*	*	*	*	*	*	*
23	Quintana Roo	5	Benito Juárez	518	Jorge Millet	865946	210518	10	2	*	*	*	*	*	*	*	*	*	*	*	*	*	*	*	*	*	*	*	*	*	*	*	*	*	*	*	*	*	*	*	*	*	*	*	*	*	*	*	*
23	Quintana Roo	5	Benito Juárez	522	El Ramonal	865842	210546	10	12	8	4	0	0	0	12	8	4	12	8	4	12	8	4	11	7	4	11	7	4	0	0	0	0	0	0	1	1	0	1	1	0	0	0	0	3	2	1	4	0
23	Quintana Roo	5	Benito Juárez	531	Lagos del Sol	865055	210315	10	156	73	83	4	0	4	149	72	77	147	72	75	124	59	65	108	50	58	90	41	49	4	0	4	21	13	8	32	18	14	16	9	7	18	9	9	9	3	6	51	2
23	Quintana Roo	5	Benito Juárez	535	La Virtud	870525	210932	8	3	*	*	*	*	*	*	*	*	*	*	*	*	*	*	*	*	*	*	*	*	*	*	*	*	*	*	*	*	*	*	*	*	*	*	*	*	*	*	*	*
23	Quintana Roo	5	Benito Juárez	553	Los Arcos	865230	205446	7	4	*	*	*	*	*	*	*	*	*	*	*	*	*	*	*	*	*	*	*	*	*	*	*	*	*	*	*	*	*	*	*	*	*	*	*	*	*	*	*	*
23	Quintana Roo	5	Benito Juárez	554	Ninguno	865039	205518	1	4	*	*	*	*	*	*	*	*	*	*	*	*	*	*	*	*	*	*	*	*	*	*	*	*	*	*	*	*	*	*	*	*	*	*	*	*	*	*	*	*
23	Quintana Roo	5	Benito Juárez	558	Sac-Pakal	865536	205116	6	3	*	*	*	*	*	*	*	*	*	*	*	*	*	*	*	*	*	*	*	*	*	*	*	*	*	*	*	*	*	*	*	*	*	*	*	*	*	*	*	*
23	Quintana Roo	5	Benito Juárez	559	San Joaquín	870157	205141	8	2	*	*	*	*	*	*	*	*	*	*	*	*	*	*	*	*	*	*	*	*	*	*	*	*	*	*	*	*	*	*	*	*	*	*	*	*	*	*	*	*
23	Quintana Roo	5	Benito Juárez	565	Rancho Alegre	870351	211045	6	4	*	*	*	*	*	*	*	*	*	*	*	*	*	*	*	*	*	*	*	*	*	*	*	*	*	*	*	*	*	*	*	*	*	*	*	*	*	*	*	*
23	Quintana Roo	5	Benito Juárez	580	Loma Bonita	865528	204903	4	5	*	*	*	*	*	*	*	*	*	*	*	*	*	*	*	*	*	*	*	*	*	*	*	*	*	*	*	*	*	*	*	*	*	*	*	*	*	*	*	*
23	Quintana Roo	5	Benito Juárez	582	El Sauce y la Palma	870520	211005	6	1	*	*	*	*	*	*	*	*	*	*	*	*	*	*	*	*	*	*	*	*	*	*	*	*	*	*	*	*	*	*	*	*	*	*	*	*	*	*	*	*
23	Quintana Roo	5	Benito Juárez	587	Doble C	865935	210524	10	2	*	*	*	*	*	*	*	*	*	*	*	*	*	*	*	*	*	*	*	*	*	*	*	*	*	*	*	*	*	*	*	*	*	*	*	*	*	*	*	*
23	Quintana Roo	5	Benito Juárez	589	Mituchu	870504	211041	6	1	*	*	*	*	*	*	*	*	*	*	*	*	*	*	*	*	*	*	*	*	*	*	*	*	*	*	*	*	*	*	*	*	*	*	*	*	*	*	*	*
23	Quintana Roo	5	Benito Juárez	591	Rancho Cactus	870843	210045	7	3	*	*	*	*	*	*	*	*	*	*	*	*	*	*	*	*	*	*	*	*	*	*	*	*	*	*	*	*	*	*	*	*	*	*	*	*	*	*	*	*
23	Quintana Roo	5	Benito Juárez	596	El Pájaro Loco	865622	205120	9	8	*	*	*	*	*	*	*	*	*	*	*	*	*	*	*	*	*	*	*	*	*	*	*	*	*	*	*	*	*	*	*	*	*	*	*	*	*	*	*	*
23	Quintana Roo	5	Benito Juárez	612	Rancho Fernández	870014	210505	8	1	*	*	*	*	*	*	*	*	*	*	*	*	*	*	*	*	*	*	*	*	*	*	*	*	*	*	*	*	*	*	*	*	*	*	*	*	*	*	*	*
23	Quintana Roo	5	Benito Juárez	613	Punta Brava	865441	204852	2	6	4	2	1	1	0	5	3	2	5	3	2	5	3	2	5	3	2	5	3	2	0	0	0	0	0	0	0	0	0	0	0	0	0	0	0	1	1	0	2	0
23	Quintana Roo	5	Benito Juárez	626	Los Reyes	865941	210518	10	3	*	*	*	*	*	*	*	*	*	*	*	*	*	*	*	*	*	*	*	*	*	*	*	*	*	*	*	*	*	*	*	*	*	*	*	*	*	*	*	*
23	Quintana Roo	5	Benito Juárez	647	Las Azucenas	871252	205809	10	1	*	*	*	*	*	*	*	*	*	*	*	*	*	*	*	*	*	*	*	*	*	*	*	*	*	*	*	*	*	*	*	*	*	*	*	*	*	*	*	*
23	Quintana Roo	5	Benito Juárez	655	Santa Rosa	870140	210422	7	5	*	*	*	*	*	*	*	*	*	*	*	*	*	*	*	*	*	*	*	*	*	*	*	*	*	*	*	*	*	*	*	*	*	*	*	*	*	*	*	*
23	Quintana Roo	5	Benito Juárez	669	El Tajonal	870521	210816	8	1	*	*	*	*	*	*	*	*	*	*	*	*	*	*	*	*	*	*	*	*	*	*	*	*	*	*	*	*	*	*	*	*	*	*	*	*	*	*	*	*
23	Quintana Roo	5	Benito Juárez	684	Un Nuevo Horizonte	870430	211039	6	1	*	*	*	*	*	*	*	*	*	*	*	*	*	*	*	*	*	*	*	*	*	*	*	*	*	*	*	*	*	*	*	*	*	*	*	*	*	*	*	*
23	Quintana Roo	5	Benito Juárez	723	Los Dos Hermanos	870527	210817	8	7	*	*	*	*	*	*	*	*	*	*	*	*	*	*	*	*	*	*	*	*	*	*	*	*	*	*	*	*	*	*	*	*	*	*	*	*	*	*	*	*
23	Quintana Roo	5	Benito Juárez	727	El Faisán	870149	210425	7	2	*	*	*	*	*	*	*	*	*	*	*	*	*	*	*	*	*	*	*	*	*	*	*	*	*	*	*	*	*	*	*	*	*	*	*	*	*	*	*	*
23	Quintana Roo	5	Benito Juárez	729	El Edén	865152	205744	7	2	*	*	*	*	*	*	*	*	*	*	*	*	*	*	*	*	*	*	*	*	*	*	*	*	*	*	*	*	*	*	*	*	*	*	*	*	*	*	*	*
23	Quintana Roo	5	Benito Juárez	730	Ninguno	870525	210905	8	1	*	*	*	*	*	*	*	*	*	*	*	*	*	*	*	*	*	*	*	*	*	*	*	*	*	*	*	*	*	*	*	*	*	*	*	*	*	*	*	*
23	Quintana Roo	5	Benito Juárez	731	Maranatha	870524	211121	10	1	*	*	*	*	*	*	*	*	*	*	*	*	*	*	*	*	*	*	*	*	*	*	*	*	*	*	*	*	*	*	*	*	*	*	*	*	*	*	*	*
23	Quintana Roo	5	Benito Juárez	757	San José	870452	210241	6	2	*	*	*	*	*	*	*	*	*	*	*	*	*	*	*	*	*	*	*	*	*	*	*	*	*	*	*	*	*	*	*	*	*	*	*	*	*	*	*	*
23	Quintana Roo	5	Benito Juárez	761	Valladolid Nuevo	871918	205644	10	3	*	*	*	*	*	*	*	*	*	*	*	*	*	*	*	*	*	*	*	*	*	*	*	*	*	*	*	*	*	*	*	*	*	*	*	*	*	*	*	*
23	Quintana Roo	5	Benito Juárez	767	Don Armando	870355	210301	6	6	*	*	*	*	*	*	*	*	*	*	*	*	*	*	*	*	*	*	*	*	*	*	*	*	*	*	*	*	*	*	*	*	*	*	*	*	*	*	*	*
23	Quintana Roo	5	Benito Juárez	780	Nicte Ha	865046	210332	10	4	*	*	*	*	*	*	*	*	*	*	*	*	*	*	*	*	*	*	*	*	*	*	*	*	*	*	*	*	*	*	*	*	*	*	*	*	*	*	*	*
23	Quintana Roo	5	Benito Juárez	784	Campestre Santa María	865628	210717	10	10	6	4	0	0	0	7	4	3	7	4	3	6	3	3	5	2	3	5	2	3	0	0	0	1	1	0	2	2	0	1	1	0	0	0	0	0	0	0	3	0
23	Quintana Roo	5	Benito Juárez	786	El Carajito	865648	210655	10	13	*	*	*	*	*	*	*	*	*	*	*	*	*	*	*	*	*	*	*	*	*	*	*	*	*	*	*	*	*	*	*	*	*	*	*	*	*	*	*	*
23	Quintana Roo	5	Benito Juárez	802	Las Coloradas	865821	210601	10	1	*	*	*	*	*	*	*	*	*	*	*	*	*	*	*	*	*	*	*	*	*	*	*	*	*	*	*	*	*	*	*	*	*	*	*	*	*	*	*	*
23	Quintana Roo	5	Benito Juárez	828	Las Arboledas	865926	210529	10	4	*	*	*	*	*	*	*	*	*	*	*	*	*	*	*	*	*	*	*	*	*	*	*	*	*	*	*	*	*	*	*	*	*	*	*	*	*	*	*	*
23	Quintana Roo	5	Benito Juárez	836	San Ignacio	870032	210456	8	3	*	*	*	*	*	*	*	*	*	*	*	*	*	*	*	*	*	*	*	*	*	*	*	*	*	*	*	*	*	*	*	*	*	*	*	*	*	*	*	*
23	Quintana Roo	5	Benito Juárez	858	Ninguno	865940	210524	10	10	*	*	*	*	*	*	*	*	*	*	*	*	*	*	*	*	*	*	*	*	*	*	*	*	*	*	*	*	*	*	*	*	*	*	*	*	*	*	*	*
23	Quintana Roo	5	Benito Juárez	875	Villa Delfines	865028	205533	1	1	*	*	*	*	*	*	*	*	*	*	*	*	*	*	*	*	*	*	*	*	*	*	*	*	*	*	*	*	*	*	*	*	*	*	*	*	*	*	*	*
23	Quintana Roo	5	Benito Juárez	876	Ninguno	865032	205526	1	1	*	*	*	*	*	*	*	*	*	*	*	*	*	*	*	*	*	*	*	*	*	*	*	*	*	*	*	*	*	*	*	*	*	*	*	*	*	*	*	*
23	Quintana Roo	5	Benito Juárez	904	Kilómetro Doce	870702	205509	10	2	*	*	*	*	*	*	*	*	*	*	*	*	*	*	*	*	*	*	*	*	*	*	*	*	*	*	*	*	*	*	*	*	*	*	*	*	*	*	*	*
23	Quintana Roo	5	Benito Juárez	915	María Isabel Tuz Hau	865800	210457	10	4	*	*	*	*	*	*	*	*	*	*	*	*	*	*	*	*	*	*	*	*	*	*	*	*	*	*	*	*	*	*	*	*	*	*	*	*	*	*	*	*
23	Quintana Roo	5	Benito Juárez	917	Mi Ranchito	870342	210321	6	25	14	11	2	2	0	23	12	11	22	11	11	21	11	10	20	10	10	19	10	9	1	1	0	1	0	1	1	1	0	1	1	0	1	0	1	3	1	2	9	2
23	Quintana Roo	5	Benito Juárez	924	El Cordobés	865927	210431	10	6	*	*	*	*	*	*	*	*	*	*	*	*	*	*	*	*	*	*	*	*	*	*	*	*	*	*	*	*	*	*	*	*	*	*	*	*	*	*	*	*
23	Quintana Roo	5	Benito Juárez	925	San Manuel	870528	210420	7	3	*	*	*	*	*	*	*	*	*	*	*	*	*	*	*	*	*	*	*	*	*	*	*	*	*	*	*	*	*	*	*	*	*	*	*	*	*	*	*	*
23	Quintana Roo	5	Benito Juárez	927	La Ceiba	870438	210332	6	2	*	*	*	*	*	*	*	*	*	*	*	*	*	*	*	*	*	*	*	*	*	*	*	*	*	*	*	*	*	*	*	*	*	*	*	*	*	*	*	*
23	Quintana Roo	5	Benito Juárez	936	El Palmar	870120	210426	7	2	*	*	*	*	*	*	*	*	*	*	*	*	*	*	*	*	*	*	*	*	*	*	*	*	*	*	*	*	*	*	*	*	*	*	*	*	*	*	*	*
23	Quintana Roo	5	Benito Juárez	950	Puerto	865049	210240	10	6	*	*	*	*	*	*	*	*	*	*	*	*	*	*	*	*	*	*	*	*	*	*	*	*	*	*	*	*	*	*	*	*	*	*	*	*	*	*	*	*
23	Quintana Roo	5	Benito Juárez	951	Person Enrejón	865346	210056	10	4	*	*	*	*	*	*	*	*	*	*	*	*	*	*	*	*	*	*	*	*	*	*	*	*	*	*	*	*	*	*	*	*	*	*	*	*	*	*	*	*
23	Quintana Roo	5	Benito Juárez	964	San Carlos	870428	210243	6	5	*	*	*	*	*	*	*	*	*	*	*	*	*	*	*	*	*	*	*	*	*	*	*	*	*	*	*	*	*	*	*	*	*	*	*	*	*	*	*	*
23	Quintana Roo	5	Benito Juárez	969	San Miguel	870343	210315	6	3	*	*	*	*	*	*	*	*	*	*	*	*	*	*	*	*	*	*	*	*	*	*	*	*	*	*	*	*	*	*	*	*	*	*	*	*	*	*	*	*
23	Quintana Roo	5	Benito Juárez	972	San Silvestre	870036	210453	8	4	*	*	*	*	*	*	*	*	*	*	*	*	*	*	*	*	*	*	*	*	*	*	*	*	*	*	*	*	*	*	*	*	*	*	*	*	*	*	*	*
23	Quintana Roo	5	Benito Juárez	976	Santa Cecilia	870047	210442	8	2	*	*	*	*	*	*	*	*	*	*	*	*	*	*	*	*	*	*	*	*	*	*	*	*	*	*	*	*	*	*	*	*	*	*	*	*	*	*	*	*
23	Quintana Roo	5	Benito Juárez	977	Santa Fabiola	871040	205823	10	1	*	*	*	*	*	*	*	*	*	*	*	*	*	*	*	*	*	*	*	*	*	*	*	*	*	*	*	*	*	*	*	*	*	*	*	*	*	*	*	*
23	Quintana Roo	5	Benito Juárez	1001	El Zafarrancho	865230	205443	7	8	*	*	*	*	*	*	*	*	*	*	*	*	*	*	*	*	*	*	*	*	*	*	*	*	*	*	*	*	*	*	*	*	*	*	*	*	*	*	*	*
23	Quintana Roo	5	Benito Juárez	1006	Lluvias de Oro	870637	210147	8	8	*	*	*	*	*	*	*	*	*	*	*	*	*	*	*	*	*	*	*	*	*	*	*	*	*	*	*	*	*	*	*	*	*	*	*	*	*	*	*	*
23	Quintana Roo	5	Benito Juárez	1014	Hipólito Manríquez	871918	205657	10	1	*	*	*	*	*	*	*	*	*	*	*	*	*	*	*	*	*	*	*	*	*	*	*	*	*	*	*	*	*	*	*	*	*	*	*	*	*	*	*	*
23	Quintana Roo	5	Benito Juárez	1020	San Diego	870509	210242	6	1	*	*	*	*	*	*	*	*	*	*	*	*	*	*	*	*	*	*	*	*	*	*	*	*	*	*	*	*	*	*	*	*	*	*	*	*	*	*	*	*
23	Quintana Roo	5	Benito Juárez	1023	Aquí Estoy, Aquí me Quedo	870827	210054	8	9	*	*	*	*	*	*	*	*	*	*	*	*	*	*	*	*	*	*	*	*	*	*	*	*	*	*	*	*	*	*	*	*	*	*	*	*	*	*	*	*
23	Quintana Roo	5	Benito Juárez	1026	Las Carmelitas	871538	205805	10	4	*	*	*	*	*	*	*	*	*	*	*	*	*	*	*	*	*	*	*	*	*	*	*	*	*	*	*	*	*	*	*	*	*	*	*	*	*	*	*	*
23	Quintana Roo	5	Benito Juárez	1027	Los Retoños	871514	205815	10	5	*	*	*	*	*	*	*	*	*	*	*	*	*	*	*	*	*	*	*	*	*	*	*	*	*	*	*	*	*	*	*	*	*	*	*	*	*	*	*	*
23	Quintana Roo	5	Benito Juárez	1028	Los Columpios	871350	205839	10	5	*	*	*	*	*	*	*	*	*	*	*	*	*	*	*	*	*	*	*	*	*	*	*	*	*	*	*	*	*	*	*	*	*	*	*	*	*	*	*	*
23	Quintana Roo	5	Benito Juárez	1030	La Carcajada	870748	210117	9	1	*	*	*	*	*	*	*	*	*	*	*	*	*	*	*	*	*	*	*	*	*	*	*	*	*	*	*	*	*	*	*	*	*	*	*	*	*	*	*	*
23	Quintana Roo	5	Benito Juárez	1031	Los Panchos	870739	210121	9	2	*	*	*	*	*	*	*	*	*	*	*	*	*	*	*	*	*	*	*	*	*	*	*	*	*	*	*	*	*	*	*	*	*	*	*	*	*	*	*	*
23	Quintana Roo	5	Benito Juárez	1032	Agua Escondida	870802	210108	9	4	*	*	*	*	*	*	*	*	*	*	*	*	*	*	*	*	*	*	*	*	*	*	*	*	*	*	*	*	*	*	*	*	*	*	*	*	*	*	*	*
23	Quintana Roo	5	Benito Juárez	1034	Los Laureles	871044	205947	10	2	*	*	*	*	*	*	*	*	*	*	*	*	*	*	*	*	*	*	*	*	*	*	*	*	*	*	*	*	*	*	*	*	*	*	*	*	*	*	*	*
23	Quintana Roo	5	Benito Juárez	1035	El Abuelo	870458	210243	6	3	*	*	*	*	*	*	*	*	*	*	*	*	*	*	*	*	*	*	*	*	*	*	*	*	*	*	*	*	*	*	*	*	*	*	*	*	*	*	*	*
23	Quintana Roo	5	Benito Juárez	1038	Villa Guadalupe	870449	210247	6	2	*	*	*	*	*	*	*	*	*	*	*	*	*	*	*	*	*	*	*	*	*	*	*	*	*	*	*	*	*	*	*	*	*	*	*	*	*	*	*	*
23	Quintana Roo	5	Benito Juárez	1047	Sac-Lol	871640	205742	10	1	*	*	*	*	*	*	*	*	*	*	*	*	*	*	*	*	*	*	*	*	*	*	*	*	*	*	*	*	*	*	*	*	*	*	*	*	*	*	*	*
23	Quintana Roo	5	Benito Juárez	1049	San Arturo	870954	210009	6	3	*	*	*	*	*	*	*	*	*	*	*	*	*	*	*	*	*	*	*	*	*	*	*	*	*	*	*	*	*	*	*	*	*	*	*	*	*	*	*	*
23	Quintana Roo	5	Benito Juárez	1051	San Isidro	870525	211023	7	1	*	*	*	*	*	*	*	*	*	*	*	*	*	*	*	*	*	*	*	*	*	*	*	*	*	*	*	*	*	*	*	*	*	*	*	*	*	*	*	*
23	Quintana Roo	5	Benito Juárez	1056	Torno Largo	870814	210101	9	6	*	*	*	*	*	*	*	*	*	*	*	*	*	*	*	*	*	*	*	*	*	*	*	*	*	*	*	*	*	*	*	*	*	*	*	*	*	*	*	*
23	Quintana Roo	5	Benito Juárez	1074	La Asunción	871633	205746	10	1	*	*	*	*	*	*	*	*	*	*	*	*	*	*	*	*	*	*	*	*	*	*	*	*	*	*	*	*	*	*	*	*	*	*	*	*	*	*	*	*
23	Quintana Roo	5	Benito Juárez	1078	Paraíso de la Bonita	865049	205440	1	14	8	6	0	0	0	14	8	6	13	7	6	13	7	6	12	7	5	10	5	5	1	1	0	0	0	0	1	0	1	1	0	1	2	2	0	0	0	0	3	1
23	Quintana Roo	5	Benito Juárez	1082	Don Armando	865943	210506	10	1	*	*	*	*	*	*	*	*	*	*	*	*	*	*	*	*	*	*	*	*	*	*	*	*	*	*	*	*	*	*	*	*	*	*	*	*	*	*	*	*
23	Quintana Roo	5	Benito Juárez	1087	Ninguno	865257	205347	6	4	*	*	*	*	*	*	*	*	*	*	*	*	*	*	*	*	*	*	*	*	*	*	*	*	*	*	*	*	*	*	*	*	*	*	*	*	*	*	*	*
23	Quintana Roo	5	Benito Juárez	1091	La Primavera	870214	210405	6	1	*	*	*	*	*	*	*	*	*	*	*	*	*	*	*	*	*	*	*	*	*	*	*	*	*	*	*	*	*	*	*	*	*	*	*	*	*	*	*	*
23	Quintana Roo	5	Benito Juárez	1092	Ninguno	865933	210511	10	1	*	*	*	*	*	*	*	*	*	*	*	*	*	*	*	*	*	*	*	*	*	*	*	*	*	*	*	*	*	*	*	*	*	*	*	*	*	*	*	*
23	Quintana Roo	5	Benito Juárez	1099	Marcos Ayala	865655	210439	10	1	*	*	*	*	*	*	*	*	*	*	*	*	*	*	*	*	*	*	*	*	*	*	*	*	*	*	*	*	*	*	*	*	*	*	*	*	*	*	*	*
23	Quintana Roo	5	Benito Juárez	1102	Pasión y Perjuicio	865948	210503	10	2	*	*	*	*	*	*	*	*	*	*	*	*	*	*	*	*	*	*	*	*	*	*	*	*	*	*	*	*	*	*	*	*	*	*	*	*	*	*	*	*
23	Quintana Roo	5	Benito Juárez	1104	Rancho Alegre	865952	210501	10	4	*	*	*	*	*	*	*	*	*	*	*	*	*	*	*	*	*	*	*	*	*	*	*	*	*	*	*	*	*	*	*	*	*	*	*	*	*	*	*	*
23	Quintana Roo	5	Benito Juárez	1111	Santa Rosa	870758	210105	9	1	*	*	*	*	*	*	*	*	*	*	*	*	*	*	*	*	*	*	*	*	*	*	*	*	*	*	*	*	*	*	*	*	*	*	*	*	*	*	*	*
23	Quintana Roo	5	Benito Juárez	1112	Chilam Balam	871620	205749	10	5	*	*	*	*	*	*	*	*	*	*	*	*	*	*	*	*	*	*	*	*	*	*	*	*	*	*	*	*	*	*	*	*	*	*	*	*	*	*	*	*
23	Quintana Roo	5	Benito Juárez	1118	Rancho Campana	865503	210321	10	1	*	*	*	*	*	*	*	*	*	*	*	*	*	*	*	*	*	*	*	*	*	*	*	*	*	*	*	*	*	*	*	*	*	*	*	*	*	*	*	*
23	Quintana Roo	5	Benito Juárez	1121	Ninguno	865550	210351	10	1	*	*	*	*	*	*	*	*	*	*	*	*	*	*	*	*	*	*	*	*	*	*	*	*	*	*	*	*	*	*	*	*	*	*	*	*	*	*	*	*
23	Quintana Roo	5	Benito Juárez	1123	Las Luisitas	865835	210541	10	6	5	1	1	1	0	5	4	1	4	3	1	4	3	1	4	3	1	4	3	1	1	1	0	0	0	0	0	0	0	0	0	0	0	0	0	1	0	1	1	0
23	Quintana Roo	5	Benito Juárez	1127	El Duende Maya	865502	210325	10	1	*	*	*	*	*	*	*	*	*	*	*	*	*	*	*	*	*	*	*	*	*	*	*	*	*	*	*	*	*	*	*	*	*	*	*	*	*	*	*	*
23	Quintana Roo	5	Benito Juárez	1135	El Potrillo	865626	205116	9	6	*	*	*	*	*	*	*	*	*	*	*	*	*	*	*	*	*	*	*	*	*	*	*	*	*	*	*	*	*	*	*	*	*	*	*	*	*	*	*	*
23	Quintana Roo	5	Benito Juárez	1136	La Pura Reata	865740	205126	9	7	*	*	*	*	*	*	*	*	*	*	*	*	*	*	*	*	*	*	*	*	*	*	*	*	*	*	*	*	*	*	*	*	*	*	*	*	*	*	*	*
23	Quintana Roo	5	Benito Juárez	1138	Los Caporales	870655	210146	8	2	*	*	*	*	*	*	*	*	*	*	*	*	*	*	*	*	*	*	*	*	*	*	*	*	*	*	*	*	*	*	*	*	*	*	*	*	*	*	*	*
23	Quintana Roo	5	Benito Juárez	1139	El Carrizal	870647	210147	8	5	*	*	*	*	*	*	*	*	*	*	*	*	*	*	*	*	*	*	*	*	*	*	*	*	*	*	*	*	*	*	*	*	*	*	*	*	*	*	*	*
23	Quintana Roo	5	Benito Juárez	1140	Colonia Chiapaneca Siglo XXI	870022	210418	7	275	139	136	15	4	11	257	134	123	244	129	115	190	100	90	167	86	81	152	75	77	17	7	10	50	27	23	61	34	27	23	14	9	15	11	4	26	12	14	61	16
23	Quintana Roo	5	Benito Juárez	1142	Los Chitos	870651	210146	8	1	*	*	*	*	*	*	*	*	*	*	*	*	*	*	*	*	*	*	*	*	*	*	*	*	*	*	*	*	*	*	*	*	*	*	*	*	*	*	*	*
23	Quintana Roo	5	Benito Juárez	1144	El Gallo	870408	210308	6	3	*	*	*	*	*	*	*	*	*	*	*	*	*	*	*	*	*	*	*	*	*	*	*	*	*	*	*	*	*	*	*	*	*	*	*	*	*	*	*	*
23	Quintana Roo	5	Benito Juárez	1145	La Guadalupana	870613	210319	7	2	*	*	*	*	*	*	*	*	*	*	*	*	*	*	*	*	*	*	*	*	*	*	*	*	*	*	*	*	*	*	*	*	*	*	*	*	*	*	*	*
23	Quintana Roo	5	Benito Juárez	1147	Kokonuts	870632	210156	7	3	*	*	*	*	*	*	*	*	*	*	*	*	*	*	*	*	*	*	*	*	*	*	*	*	*	*	*	*	*	*	*	*	*	*	*	*	*	*	*	*
23	Quintana Roo	5	Benito Juárez	1148	Ninguno	870630	210344	8	5	*	*	*	*	*	*	*	*	*	*	*	*	*	*	*	*	*	*	*	*	*	*	*	*	*	*	*	*	*	*	*	*	*	*	*	*	*	*	*	*
23	Quintana Roo	5	Benito Juárez	1150	Monte Sión	870525	210251	7	3	*	*	*	*	*	*	*	*	*	*	*	*	*	*	*	*	*	*	*	*	*	*	*	*	*	*	*	*	*	*	*	*	*	*	*	*	*	*	*	*
23	Quintana Roo	5	Benito Juárez	1155	El Pedregal	870814	210102	9	5	*	*	*	*	*	*	*	*	*	*	*	*	*	*	*	*	*	*	*	*	*	*	*	*	*	*	*	*	*	*	*	*	*	*	*	*	*	*	*	*
23	Quintana Roo	5	Benito Juárez	1156	El Porvenir	870002	210442	9	505	266	239	41	22	19	464	244	220	443	234	209	361	190	171	309	162	147	282	145	137	31	16	15	72	38	34	103	55	48	52	28	24	27	17	10	54	25	29	126	24
23	Quintana Roo	5	Benito Juárez	1157	El Porvenir	870446	210248	6	7	*	*	*	*	*	*	*	*	*	*	*	*	*	*	*	*	*	*	*	*	*	*	*	*	*	*	*	*	*	*	*	*	*	*	*	*	*	*	*	*
23	Quintana Roo	5	Benito Juárez	1158	Quinta Rico	870938	210011	6	4	*	*	*	*	*	*	*	*	*	*	*	*	*	*	*	*	*	*	*	*	*	*	*	*	*	*	*	*	*	*	*	*	*	*	*	*	*	*	*	*
23	Quintana Roo	5	Benito Juárez	1160	San Francisco	870855	210038	7	3	*	*	*	*	*	*	*	*	*	*	*	*	*	*	*	*	*	*	*	*	*	*	*	*	*	*	*	*	*	*	*	*	*	*	*	*	*	*	*	*
23	Quintana Roo	5	Benito Juárez	1163	Santa Martha	870546	210254	6	1	*	*	*	*	*	*	*	*	*	*	*	*	*	*	*	*	*	*	*	*	*	*	*	*	*	*	*	*	*	*	*	*	*	*	*	*	*	*	*	*
23	Quintana Roo	5	Benito Juárez	1165	Los Tres Balam	870639	211114	10	1	*	*	*	*	*	*	*	*	*	*	*	*	*	*	*	*	*	*	*	*	*	*	*	*	*	*	*	*	*	*	*	*	*	*	*	*	*	*	*	*
23	Quintana Roo	5	Benito Juárez	1168	El Willy (Parcela Diecisiete)	870524	210344	6	5	*	*	*	*	*	*	*	*	*	*	*	*	*	*	*	*	*	*	*	*	*	*	*	*	*	*	*	*	*	*	*	*	*	*	*	*	*	*	*	*
23	Quintana Roo	5	Benito Juárez	1190	Rancho Gubiña	870043	205136	8	1	*	*	*	*	*	*	*	*	*	*	*	*	*	*	*	*	*	*	*	*	*	*	*	*	*	*	*	*	*	*	*	*	*	*	*	*	*	*	*	*
23	Quintana Roo	5	Benito Juárez	1192	Santa Apolonia	865817	205124	8	3	*	*	*	*	*	*	*	*	*	*	*	*	*	*	*	*	*	*	*	*	*	*	*	*	*	*	*	*	*	*	*	*	*	*	*	*	*	*	*	*
23	Quintana Roo	5	Benito Juárez	1193	La Vereda Tropical	865806	205131	9	5	*	*	*	*	*	*	*	*	*	*	*	*	*	*	*	*	*	*	*	*	*	*	*	*	*	*	*	*	*	*	*	*	*	*	*	*	*	*	*	*
23	Quintana Roo	5	Benito Juárez	1225	La Paz	871117	205905	10	1	*	*	*	*	*	*	*	*	*	*	*	*	*	*	*	*	*	*	*	*	*	*	*	*	*	*	*	*	*	*	*	*	*	*	*	*	*	*	*	*
23	Quintana Roo	5	Benito Juárez	1236	Santa María	871820	205701	10	5	*	*	*	*	*	*	*	*	*	*	*	*	*	*	*	*	*	*	*	*	*	*	*	*	*	*	*	*	*	*	*	*	*	*	*	*	*	*	*	*
23	Quintana Roo	5	Benito Juárez	1237	Santa Regina	871644	205740	10	6	*	*	*	*	*	*	*	*	*	*	*	*	*	*	*	*	*	*	*	*	*	*	*	*	*	*	*	*	*	*	*	*	*	*	*	*	*	*	*	*
23	Quintana Roo	5	Benito Juárez	1242	El Trópico	871031	205956	7	10	*	*	*	*	*	*	*	*	*	*	*	*	*	*	*	*	*	*	*	*	*	*	*	*	*	*	*	*	*	*	*	*	*	*	*	*	*	*	*	*
23	Quintana Roo	5	Benito Juárez	1261	Las Palmas	865942	210528	10	33	19	14	2	1	1	31	18	13	30	17	13	27	16	11	25	15	10	23	14	9	2	1	1	2	1	1	3	2	1	2	1	1	2	1	1	6	4	2	8	2
23	Quintana Roo	5	Benito Juárez	1266	Diez de Septiembre	870534	210219	6	2	*	*	*	*	*	*	*	*	*	*	*	*	*	*	*	*	*	*	*	*	*	*	*	*	*	*	*	*	*	*	*	*	*	*	*	*	*	*	*	*
23	Quintana Roo	5	Benito Juárez	1273	La Bendición de Dios	870531	210323	7	2	*	*	*	*	*	*	*	*	*	*	*	*	*	*	*	*	*	*	*	*	*	*	*	*	*	*	*	*	*	*	*	*	*	*	*	*	*	*	*	*
23	Quintana Roo	5	Benito Juárez	1274	Calisureño	865912	210531	10	2	*	*	*	*	*	*	*	*	*	*	*	*	*	*	*	*	*	*	*	*	*	*	*	*	*	*	*	*	*	*	*	*	*	*	*	*	*	*	*	*
23	Quintana Roo	5	Benito Juárez	1275	Campestre la Finca	870111	210436	7	6	*	*	*	*	*	*	*	*	*	*	*	*	*	*	*	*	*	*	*	*	*	*	*	*	*	*	*	*	*	*	*	*	*	*	*	*	*	*	*	*
23	Quintana Roo	5	Benito Juárez	1276	Campo de Tiro	870633	211113	10	1	*	*	*	*	*	*	*	*	*	*	*	*	*	*	*	*	*	*	*	*	*	*	*	*	*	*	*	*	*	*	*	*	*	*	*	*	*	*	*	*
23	Quintana Roo	5	Benito Juárez	1277	Chan Dzonot	865851	205128	8	3	*	*	*	*	*	*	*	*	*	*	*	*	*	*	*	*	*	*	*	*	*	*	*	*	*	*	*	*	*	*	*	*	*	*	*	*	*	*	*	*
23	Quintana Roo	5	Benito Juárez	1278	La Changa	870747	205647	10	3	*	*	*	*	*	*	*	*	*	*	*	*	*	*	*	*	*	*	*	*	*	*	*	*	*	*	*	*	*	*	*	*	*	*	*	*	*	*	*	*
23	Quintana Roo	5	Benito Juárez	1279	Los Coquitos	870537	210417	7	18	13	5	0	0	0	18	13	5	18	13	5	18	13	5	18	13	5	15	12	3	0	0	0	0	0	0	0	0	0	0	0	0	3	1	2	7	6	1	4	2
23	Quintana Roo	5	Benito Juárez	1280	Cuna de Lobos	870445	210319	6	7	*	*	*	*	*	*	*	*	*	*	*	*	*	*	*	*	*	*	*	*	*	*	*	*	*	*	*	*	*	*	*	*	*	*	*	*	*	*	*	*
23	Quintana Roo	5	Benito Juárez	1284	Divino Niño	870245	210349	6	3	*	*	*	*	*	*	*	*	*	*	*	*	*	*	*	*	*	*	*	*	*	*	*	*	*	*	*	*	*	*	*	*	*	*	*	*	*	*	*	*
23	Quintana Roo	5	Benito Juárez	1286	Don Martín	870608	210208	7	1	*	*	*	*	*	*	*	*	*	*	*	*	*	*	*	*	*	*	*	*	*	*	*	*	*	*	*	*	*	*	*	*	*	*	*	*	*	*	*	*
23	Quintana Roo	5	Benito Juárez	1290	La Gallega	870254	210345	6	1	*	*	*	*	*	*	*	*	*	*	*	*	*	*	*	*	*	*	*	*	*	*	*	*	*	*	*	*	*	*	*	*	*	*	*	*	*	*	*	*
23	Quintana Roo	5	Benito Juárez	1294	La Ilusión	870305	211044	6	2	*	*	*	*	*	*	*	*	*	*	*	*	*	*	*	*	*	*	*	*	*	*	*	*	*	*	*	*	*	*	*	*	*	*	*	*	*	*	*	*
23	Quintana Roo	5	Benito Juárez	1305	Addy	870529	210222	6	1	*	*	*	*	*	*	*	*	*	*	*	*	*	*	*	*	*	*	*	*	*	*	*	*	*	*	*	*	*	*	*	*	*	*	*	*	*	*	*	*
23	Quintana Roo	5	Benito Juárez	1306	Los Gavilanes	870528	210529	7	2	*	*	*	*	*	*	*	*	*	*	*	*	*	*	*	*	*	*	*	*	*	*	*	*	*	*	*	*	*	*	*	*	*	*	*	*	*	*	*	*
23	Quintana Roo	5	Benito Juárez	1307	Las Fincas	871050	205951	8	2	*	*	*	*	*	*	*	*	*	*	*	*	*	*	*	*	*	*	*	*	*	*	*	*	*	*	*	*	*	*	*	*	*	*	*	*	*	*	*	*
23	Quintana Roo	5	Benito Juárez	1309	Ninguno	870525	211100	9	4	*	*	*	*	*	*	*	*	*	*	*	*	*	*	*	*	*	*	*	*	*	*	*	*	*	*	*	*	*	*	*	*	*	*	*	*	*	*	*	*
23	Quintana Roo	5	Benito Juárez	1310	Ninguno	870524	210217	6	7	*	*	*	*	*	*	*	*	*	*	*	*	*	*	*	*	*	*	*	*	*	*	*	*	*	*	*	*	*	*	*	*	*	*	*	*	*	*	*	*
23	Quintana Roo	5	Benito Juárez	1312	Ninguno	871105	205940	10	2	*	*	*	*	*	*	*	*	*	*	*	*	*	*	*	*	*	*	*	*	*	*	*	*	*	*	*	*	*	*	*	*	*	*	*	*	*	*	*	*
23	Quintana Roo	5	Benito Juárez	1315	Loiritas Band	870537	210217	6	7	*	*	*	*	*	*	*	*	*	*	*	*	*	*	*	*	*	*	*	*	*	*	*	*	*	*	*	*	*	*	*	*	*	*	*	*	*	*	*	*
23	Quintana Roo	5	Benito Juárez	1317	Luz del Mundo	870932	210013	6	6	*	*	*	*	*	*	*	*	*	*	*	*	*	*	*	*	*	*	*	*	*	*	*	*	*	*	*	*	*	*	*	*	*	*	*	*	*	*	*	*
23	Quintana Roo	5	Benito Juárez	1318	El Maduro	871921	205328	10	2	*	*	*	*	*	*	*	*	*	*	*	*	*	*	*	*	*	*	*	*	*	*	*	*	*	*	*	*	*	*	*	*	*	*	*	*	*	*	*	*
23	Quintana Roo	5	Benito Juárez	1319	Maquinaria García	870229	210358	6	3	*	*	*	*	*	*	*	*	*	*	*	*	*	*	*	*	*	*	*	*	*	*	*	*	*	*	*	*	*	*	*	*	*	*	*	*	*	*	*	*
23	Quintana Roo	5	Benito Juárez	1325	Orenda	870640	210145	8	6	*	*	*	*	*	*	*	*	*	*	*	*	*	*	*	*	*	*	*	*	*	*	*	*	*	*	*	*	*	*	*	*	*	*	*	*	*	*	*	*
23	Quintana Roo	5	Benito Juárez	1326	El Palomo	870359	205150	10	2	*	*	*	*	*	*	*	*	*	*	*	*	*	*	*	*	*	*	*	*	*	*	*	*	*	*	*	*	*	*	*	*	*	*	*	*	*	*	*	*
23	Quintana Roo	5	Benito Juárez	1328	Pentatlán	865847	210544	10	4	*	*	*	*	*	*	*	*	*	*	*	*	*	*	*	*	*	*	*	*	*	*	*	*	*	*	*	*	*	*	*	*	*	*	*	*	*	*	*	*
23	Quintana Roo	5	Benito Juárez	1329	Las Potrancas	871025	205959	6	4	*	*	*	*	*	*	*	*	*	*	*	*	*	*	*	*	*	*	*	*	*	*	*	*	*	*	*	*	*	*	*	*	*	*	*	*	*	*	*	*
23	Quintana Roo	5	Benito Juárez	1330	La Primavera	865841	210536	10	13	8	5	2	0	2	11	8	3	10	7	3	9	7	2	9	7	2	9	7	2	2	1	1	0	0	0	0	0	0	0	0	0	0	0	0	0	0	0	2	1
23	Quintana Roo	5	Benito Juárez	1331	Los Querubines	870711	210129	9	4	*	*	*	*	*	*	*	*	*	*	*	*	*	*	*	*	*	*	*	*	*	*	*	*	*	*	*	*	*	*	*	*	*	*	*	*	*	*	*	*
23	Quintana Roo	5	Benito Juárez	1337	San Antonio de Padua	870716	210127	9	1	*	*	*	*	*	*	*	*	*	*	*	*	*	*	*	*	*	*	*	*	*	*	*	*	*	*	*	*	*	*	*	*	*	*	*	*	*	*	*	*
23	Quintana Roo	5	Benito Juárez	1338	San Armando	870341	210304	6	1	*	*	*	*	*	*	*	*	*	*	*	*	*	*	*	*	*	*	*	*	*	*	*	*	*	*	*	*	*	*	*	*	*	*	*	*	*	*	*	*
23	Quintana Roo	5	Benito Juárez	1339	San Jeremías	870525	210307	7	3	*	*	*	*	*	*	*	*	*	*	*	*	*	*	*	*	*	*	*	*	*	*	*	*	*	*	*	*	*	*	*	*	*	*	*	*	*	*	*	*
23	Quintana Roo	5	Benito Juárez	1340	San Ignacio	870538	210223	6	2	*	*	*	*	*	*	*	*	*	*	*	*	*	*	*	*	*	*	*	*	*	*	*	*	*	*	*	*	*	*	*	*	*	*	*	*	*	*	*	*
23	Quintana Roo	5	Benito Juárez	1342	San Jorge	870249	210347	6	2	*	*	*	*	*	*	*	*	*	*	*	*	*	*	*	*	*	*	*	*	*	*	*	*	*	*	*	*	*	*	*	*	*	*	*	*	*	*	*	*
23	Quintana Roo	5	Benito Juárez	1343	Santa Inés	870319	210332	6	4	*	*	*	*	*	*	*	*	*	*	*	*	*	*	*	*	*	*	*	*	*	*	*	*	*	*	*	*	*	*	*	*	*	*	*	*	*	*	*	*
23	Quintana Roo	5	Benito Juárez	1345	Stone Wall	865840	210539	10	1	*	*	*	*	*	*	*	*	*	*	*	*	*	*	*	*	*	*	*	*	*	*	*	*	*	*	*	*	*	*	*	*	*	*	*	*	*	*	*	*
23	Quintana Roo	5	Benito Juárez	1347	Torrecillas	865953	210511	10	3	*	*	*	*	*	*	*	*	*	*	*	*	*	*	*	*	*	*	*	*	*	*	*	*	*	*	*	*	*	*	*	*	*	*	*	*	*	*	*	*
23	Quintana Roo	5	Benito Juárez	1348	Tres Ases	865939	210506	10	1	*	*	*	*	*	*	*	*	*	*	*	*	*	*	*	*	*	*	*	*	*	*	*	*	*	*	*	*	*	*	*	*	*	*	*	*	*	*	*	*
23	Quintana Roo	5	Benito Juárez	1350	El Verdín	871855	205653	10	4	*	*	*	*	*	*	*	*	*	*	*	*	*	*	*	*	*	*	*	*	*	*	*	*	*	*	*	*	*	*	*	*	*	*	*	*	*	*	*	*
23	Quintana Roo	5	Benito Juárez	1352	El Andariego	870244	210344	6	2	*	*	*	*	*	*	*	*	*	*	*	*	*	*	*	*	*	*	*	*	*	*	*	*	*	*	*	*	*	*	*	*	*	*	*	*	*	*	*	*
23	Quintana Roo	5	Benito Juárez	1364	Boca del Puma	870320	205150	9	1	*	*	*	*	*	*	*	*	*	*	*	*	*	*	*	*	*	*	*	*	*	*	*	*	*	*	*	*	*	*	*	*	*	*	*	*	*	*	*	*
23	Quintana Roo	5	Benito Juárez	1365	Kilómetro Trescientos [Campamento]	865421	210301	10	2	*	*	*	*	*	*	*	*	*	*	*	*	*	*	*	*	*	*	*	*	*	*	*	*	*	*	*	*	*	*	*	*	*	*	*	*	*	*	*	*
23	Quintana Roo	5	Benito Juárez	1366	El Cardenal	865548	205117	7	2	*	*	*	*	*	*	*	*	*	*	*	*	*	*	*	*	*	*	*	*	*	*	*	*	*	*	*	*	*	*	*	*	*	*	*	*	*	*	*	*
23	Quintana Roo	5	Benito Juárez	1370	El Discípulo	865734	205123	9	2	*	*	*	*	*	*	*	*	*	*	*	*	*	*	*	*	*	*	*	*	*	*	*	*	*	*	*	*	*	*	*	*	*	*	*	*	*	*	*	*
23	Quintana Roo	5	Benito Juárez	1371	Don Beto	870027	210454	8	3	*	*	*	*	*	*	*	*	*	*	*	*	*	*	*	*	*	*	*	*	*	*	*	*	*	*	*	*	*	*	*	*	*	*	*	*	*	*	*	*
23	Quintana Roo	5	Benito Juárez	1373	El Edén	865915	210528	10	4	*	*	*	*	*	*	*	*	*	*	*	*	*	*	*	*	*	*	*	*	*	*	*	*	*	*	*	*	*	*	*	*	*	*	*	*	*	*	*	*
23	Quintana Roo	5	Benito Juárez	1374	La Iguana	865546	205113	7	1	*	*	*	*	*	*	*	*	*	*	*	*	*	*	*	*	*	*	*	*	*	*	*	*	*	*	*	*	*	*	*	*	*	*	*	*	*	*	*	*
23	Quintana Roo	5	Benito Juárez	1376	Kiimak in Wo'ol	865949	205125	7	1	*	*	*	*	*	*	*	*	*	*	*	*	*	*	*	*	*	*	*	*	*	*	*	*	*	*	*	*	*	*	*	*	*	*	*	*	*	*	*	*
23	Quintana Roo	5	Benito Juárez	1377	Kilómetro Catorce Punto Siete	870232	205144	8	4	*	*	*	*	*	*	*	*	*	*	*	*	*	*	*	*	*	*	*	*	*	*	*	*	*	*	*	*	*	*	*	*	*	*	*	*	*	*	*	*
23	Quintana Roo	5	Benito Juárez	1379	Ninguno	865219	205559	6	8	*	*	*	*	*	*	*	*	*	*	*	*	*	*	*	*	*	*	*	*	*	*	*	*	*	*	*	*	*	*	*	*	*	*	*	*	*	*	*	*
23	Quintana Roo	5	Benito Juárez	1384	Mama Luum	870439	205227	10	1	*	*	*	*	*	*	*	*	*	*	*	*	*	*	*	*	*	*	*	*	*	*	*	*	*	*	*	*	*	*	*	*	*	*	*	*	*	*	*	*
23	Quintana Roo	5	Benito Juárez	1388	Nuevo Amanecer	865642	210435	10	32	16	16	3	0	3	29	16	13	29	16	13	19	9	10	16	9	7	16	9	7	2	2	0	8	5	3	7	2	5	3	0	3	0	0	0	3	2	1	4	4
23	Quintana Roo	5	Benito Juárez	1389	Las Palmas	865415	210252	10	4	*	*	*	*	*	*	*	*	*	*	*	*	*	*	*	*	*	*	*	*	*	*	*	*	*	*	*	*	*	*	*	*	*	*	*	*	*	*	*	*
23	Quintana Roo	5	Benito Juárez	1390	Panacea	870227	205137	8	4	*	*	*	*	*	*	*	*	*	*	*	*	*	*	*	*	*	*	*	*	*	*	*	*	*	*	*	*	*	*	*	*	*	*	*	*	*	*	*	*
23	Quintana Roo	5	Benito Juárez	1392	El Pedregal	865933	205129	7	13	4	9	4	0	4	9	4	5	9	4	5	9	4	5	9	4	5	9	4	5	0	0	0	0	0	0	0	0	0	0	0	0	0	0	0	5	2	3	4	0
23	Quintana Roo	5	Benito Juárez	1393	Pura Cepa	870355	210313	6	2	*	*	*	*	*	*	*	*	*	*	*	*	*	*	*	*	*	*	*	*	*	*	*	*	*	*	*	*	*	*	*	*	*	*	*	*	*	*	*	*
23	Quintana Roo	5	Benito Juárez	1394	Rancho Marimar	865401	210248	10	3	*	*	*	*	*	*	*	*	*	*	*	*	*	*	*	*	*	*	*	*	*	*	*	*	*	*	*	*	*	*	*	*	*	*	*	*	*	*	*	*
23	Quintana Roo	5	Benito Juárez	1396	Regina Kilómetro Doscientos Noventa y Ocho	870038	210447	8	3	*	*	*	*	*	*	*	*	*	*	*	*	*	*	*	*	*	*	*	*	*	*	*	*	*	*	*	*	*	*	*	*	*	*	*	*	*	*	*	*
23	Quintana Roo	5	Benito Juárez	1397	El Rey Polo Country	870042	205137	8	2	*	*	*	*	*	*	*	*	*	*	*	*	*	*	*	*	*	*	*	*	*	*	*	*	*	*	*	*	*	*	*	*	*	*	*	*	*	*	*	*
23	Quintana Roo	5	Benito Juárez	1401	Tres García	870419	210311	6	2	*	*	*	*	*	*	*	*	*	*	*	*	*	*	*	*	*	*	*	*	*	*	*	*	*	*	*	*	*	*	*	*	*	*	*	*	*	*	*	*
23	Quintana Roo	5	Benito Juárez	1402	Tzol Kin	870050	205138	9	1	*	*	*	*	*	*	*	*	*	*	*	*	*	*	*	*	*	*	*	*	*	*	*	*	*	*	*	*	*	*	*	*	*	*	*	*	*	*	*	*
23	Quintana Roo	5	Benito Juárez	1405	Quince de Septiembre	870800	210345	7	1	*	*	*	*	*	*	*	*	*	*	*	*	*	*	*	*	*	*	*	*	*	*	*	*	*	*	*	*	*	*	*	*	*	*	*	*	*	*	*	*
23	Quintana Roo	5	Benito Juárez	1409	Atlantes	865806	210833	10	2	*	*	*	*	*	*	*	*	*	*	*	*	*	*	*	*	*	*	*	*	*	*	*	*	*	*	*	*	*	*	*	*	*	*	*	*	*	*	*	*
23	Quintana Roo	5	Benito Juárez	1412	Centro Cristiano Peniel [Campamento]	870525	210550	7	2	*	*	*	*	*	*	*	*	*	*	*	*	*	*	*	*	*	*	*	*	*	*	*	*	*	*	*	*	*	*	*	*	*	*	*	*	*	*	*	*
23	Quintana Roo	5	Benito Juárez	1413	Campestre Dos	870530	210308	7	1	*	*	*	*	*	*	*	*	*	*	*	*	*	*	*	*	*	*	*	*	*	*	*	*	*	*	*	*	*	*	*	*	*	*	*	*	*	*	*	*
23	Quintana Roo	5	Benito Juárez	1414	Campo Nuevo	870918	210038	6	5	*	*	*	*	*	*	*	*	*	*	*	*	*	*	*	*	*	*	*	*	*	*	*	*	*	*	*	*	*	*	*	*	*	*	*	*	*	*	*	*
23	Quintana Roo	5	Benito Juárez	1416	Casa los Arcos	865522	205013	8	8	*	*	*	*	*	*	*	*	*	*	*	*	*	*	*	*	*	*	*	*	*	*	*	*	*	*	*	*	*	*	*	*	*	*	*	*	*	*	*	*
23	Quintana Roo	5	Benito Juárez	1417	El Chus	870528	210400	6	1	*	*	*	*	*	*	*	*	*	*	*	*	*	*	*	*	*	*	*	*	*	*	*	*	*	*	*	*	*	*	*	*	*	*	*	*	*	*	*	*
23	Quintana Roo	5	Benito Juárez	1419	La Dama y el Caballero	870526	210509	8	6	*	*	*	*	*	*	*	*	*	*	*	*	*	*	*	*	*	*	*	*	*	*	*	*	*	*	*	*	*	*	*	*	*	*	*	*	*	*	*	*
23	Quintana Roo	5	Benito Juárez	1422	Dos Potrillos	871516	205812	10	3	*	*	*	*	*	*	*	*	*	*	*	*	*	*	*	*	*	*	*	*	*	*	*	*	*	*	*	*	*	*	*	*	*	*	*	*	*	*	*	*
23	Quintana Roo	5	Benito Juárez	1423	Esmeralda	871037	205956	7	7	*	*	*	*	*	*	*	*	*	*	*	*	*	*	*	*	*	*	*	*	*	*	*	*	*	*	*	*	*	*	*	*	*	*	*	*	*	*	*	*
23	Quintana Roo	5	Benito Juárez	1424	La Esperanza	870526	210515	8	2	*	*	*	*	*	*	*	*	*	*	*	*	*	*	*	*	*	*	*	*	*	*	*	*	*	*	*	*	*	*	*	*	*	*	*	*	*	*	*	*
23	Quintana Roo	5	Benito Juárez	1425	Fedajabu	870835	210059	8	1	*	*	*	*	*	*	*	*	*	*	*	*	*	*	*	*	*	*	*	*	*	*	*	*	*	*	*	*	*	*	*	*	*	*	*	*	*	*	*	*
23	Quintana Roo	5	Benito Juárez	1426	Flecha Roja	870315	210340	6	3	*	*	*	*	*	*	*	*	*	*	*	*	*	*	*	*	*	*	*	*	*	*	*	*	*	*	*	*	*	*	*	*	*	*	*	*	*	*	*	*
23	Quintana Roo	5	Benito Juárez	1427	Galilea Antiguo Tezón	870757	210119	9	2	*	*	*	*	*	*	*	*	*	*	*	*	*	*	*	*	*	*	*	*	*	*	*	*	*	*	*	*	*	*	*	*	*	*	*	*	*	*	*	*
23	Quintana Roo	5	Benito Juárez	1429	Herlaz	870849	210042	7	1	*	*	*	*	*	*	*	*	*	*	*	*	*	*	*	*	*	*	*	*	*	*	*	*	*	*	*	*	*	*	*	*	*	*	*	*	*	*	*	*
23	Quintana Roo	5	Benito Juárez	1431	Hernán	870204	205141	8	1	*	*	*	*	*	*	*	*	*	*	*	*	*	*	*	*	*	*	*	*	*	*	*	*	*	*	*	*	*	*	*	*	*	*	*	*	*	*	*	*
23	Quintana Roo	5	Benito Juárez	1434	Las Jamaicas	870523	210829	8	1	*	*	*	*	*	*	*	*	*	*	*	*	*	*	*	*	*	*	*	*	*	*	*	*	*	*	*	*	*	*	*	*	*	*	*	*	*	*	*	*
23	Quintana Roo	5	Benito Juárez	1437	La Jungla	871011	210011	6	1	*	*	*	*	*	*	*	*	*	*	*	*	*	*	*	*	*	*	*	*	*	*	*	*	*	*	*	*	*	*	*	*	*	*	*	*	*	*	*	*
23	Quintana Roo	5	Benito Juárez	1438	La Jungla	865422	205130	3	1	*	*	*	*	*	*	*	*	*	*	*	*	*	*	*	*	*	*	*	*	*	*	*	*	*	*	*	*	*	*	*	*	*	*	*	*	*	*	*	*
23	Quintana Roo	5	Benito Juárez	1439	Kilómetro Doscientos Ochenta y Siete Punto Cinco (Fuente Agua Viva)	870557	210212	6	2	*	*	*	*	*	*	*	*	*	*	*	*	*	*	*	*	*	*	*	*	*	*	*	*	*	*	*	*	*	*	*	*	*	*	*	*	*	*	*	*
23	Quintana Roo	5	Benito Juárez	1440	Los Laureles	870519	211227	10	7	*	*	*	*	*	*	*	*	*	*	*	*	*	*	*	*	*	*	*	*	*	*	*	*	*	*	*	*	*	*	*	*	*	*	*	*	*	*	*	*
23	Quintana Roo	5	Benito Juárez	1441	León de Judá	870608	210212	7	1	*	*	*	*	*	*	*	*	*	*	*	*	*	*	*	*	*	*	*	*	*	*	*	*	*	*	*	*	*	*	*	*	*	*	*	*	*	*	*	*
23	Quintana Roo	5	Benito Juárez	1442	Lluvia de Gracia	870757	210330	7	1	*	*	*	*	*	*	*	*	*	*	*	*	*	*	*	*	*	*	*	*	*	*	*	*	*	*	*	*	*	*	*	*	*	*	*	*	*	*	*	*
23	Quintana Roo	5	Benito Juárez	1443	Ninguno	870520	211223	10	2	*	*	*	*	*	*	*	*	*	*	*	*	*	*	*	*	*	*	*	*	*	*	*	*	*	*	*	*	*	*	*	*	*	*	*	*	*	*	*	*
23	Quintana Roo	5	Benito Juárez	1447	Ninguno	870525	210541	7	1	*	*	*	*	*	*	*	*	*	*	*	*	*	*	*	*	*	*	*	*	*	*	*	*	*	*	*	*	*	*	*	*	*	*	*	*	*	*	*	*
23	Quintana Roo	5	Benito Juárez	1448	Ninguno	870526	210455	8	2	*	*	*	*	*	*	*	*	*	*	*	*	*	*	*	*	*	*	*	*	*	*	*	*	*	*	*	*	*	*	*	*	*	*	*	*	*	*	*	*
23	Quintana Roo	5	Benito Juárez	1449	Ninguno	870444	210346	6	2	*	*	*	*	*	*	*	*	*	*	*	*	*	*	*	*	*	*	*	*	*	*	*	*	*	*	*	*	*	*	*	*	*	*	*	*	*	*	*	*
23	Quintana Roo	5	Benito Juárez	1450	Ninguno	870445	210346	6	5	*	*	*	*	*	*	*	*	*	*	*	*	*	*	*	*	*	*	*	*	*	*	*	*	*	*	*	*	*	*	*	*	*	*	*	*	*	*	*	*
23	Quintana Roo	5	Benito Juárez	1451	Ninguno	870448	210351	6	2	*	*	*	*	*	*	*	*	*	*	*	*	*	*	*	*	*	*	*	*	*	*	*	*	*	*	*	*	*	*	*	*	*	*	*	*	*	*	*	*
23	Quintana Roo	5	Benito Juárez	1452	Ninguno	870545	210312	7	1	*	*	*	*	*	*	*	*	*	*	*	*	*	*	*	*	*	*	*	*	*	*	*	*	*	*	*	*	*	*	*	*	*	*	*	*	*	*	*	*
23	Quintana Roo	5	Benito Juárez	1453	Ninguno	870559	210217	6	6	*	*	*	*	*	*	*	*	*	*	*	*	*	*	*	*	*	*	*	*	*	*	*	*	*	*	*	*	*	*	*	*	*	*	*	*	*	*	*	*
23	Quintana Roo	5	Benito Juárez	1454	Ninguno	870754	210319	7	1	*	*	*	*	*	*	*	*	*	*	*	*	*	*	*	*	*	*	*	*	*	*	*	*	*	*	*	*	*	*	*	*	*	*	*	*	*	*	*	*
23	Quintana Roo	5	Benito Juárez	1461	Ninguno	870234	210400	6	4	*	*	*	*	*	*	*	*	*	*	*	*	*	*	*	*	*	*	*	*	*	*	*	*	*	*	*	*	*	*	*	*	*	*	*	*	*	*	*	*
23	Quintana Roo	5	Benito Juárez	1462	Ninguno	865518	205026	8	11	7	4	0	0	0	11	7	4	10	7	3	10	7	3	9	7	2	9	7	2	1	0	1	0	0	0	1	0	1	1	0	1	0	0	0	2	2	0	2	1
23	Quintana Roo	5	Benito Juárez	1470	Ninguno	865603	205209	6	20	*	*	*	*	*	*	*	*	*	*	*	*	*	*	*	*	*	*	*	*	*	*	*	*	*	*	*	*	*	*	*	*	*	*	*	*	*	*	*	*
23	Quintana Roo	5	Benito Juárez	1472	Mahanaim	870831	210052	8	3	*	*	*	*	*	*	*	*	*	*	*	*	*	*	*	*	*	*	*	*	*	*	*	*	*	*	*	*	*	*	*	*	*	*	*	*	*	*	*	*
23	Quintana Roo	5	Benito Juárez	1475	La Milpa	870526	210549	7	3	*	*	*	*	*	*	*	*	*	*	*	*	*	*	*	*	*	*	*	*	*	*	*	*	*	*	*	*	*	*	*	*	*	*	*	*	*	*	*	*
23	Quintana Roo	5	Benito Juárez	1478	Nueva Jerusalén	870309	210342	6	71	44	27	5	3	2	66	41	25	63	41	22	55	34	21	54	33	21	52	32	20	6	3	3	5	4	1	6	5	1	1	1	0	2	1	1	4	1	3	15	8
23	Quintana Roo	5	Benito Juárez	1479	Los Nuez	870526	210526	8	4	*	*	*	*	*	*	*	*	*	*	*	*	*	*	*	*	*	*	*	*	*	*	*	*	*	*	*	*	*	*	*	*	*	*	*	*	*	*	*	*
23	Quintana Roo	5	Benito Juárez	1480	Pacheco Acuatic	865513	205113	5	4	*	*	*	*	*	*	*	*	*	*	*	*	*	*	*	*	*	*	*	*	*	*	*	*	*	*	*	*	*	*	*	*	*	*	*	*	*	*	*	*
23	Quintana Roo	5	Benito Juárez	1481	El Paradero	870525	210235	6	1	*	*	*	*	*	*	*	*	*	*	*	*	*	*	*	*	*	*	*	*	*	*	*	*	*	*	*	*	*	*	*	*	*	*	*	*	*	*	*	*
23	Quintana Roo	5	Benito Juárez	1482	Península Resort	864833	210151	9	12	6	6	0	0	0	9	4	5	9	4	5	7	3	4	6	3	3	5	2	3	0	0	0	2	1	1	2	0	2	1	0	1	1	1	0	1	0	1	3	0
23	Quintana Roo	5	Benito Juárez	1483	Las Piedritas	870522	211055	8	2	*	*	*	*	*	*	*	*	*	*	*	*	*	*	*	*	*	*	*	*	*	*	*	*	*	*	*	*	*	*	*	*	*	*	*	*	*	*	*	*
23	Quintana Roo	5	Benito Juárez	1487	Los Primos	870510	210356	6	2	*	*	*	*	*	*	*	*	*	*	*	*	*	*	*	*	*	*	*	*	*	*	*	*	*	*	*	*	*	*	*	*	*	*	*	*	*	*	*	*
23	Quintana Roo	5	Benito Juárez	1491	Rancho JR	870523	210919	8	1	*	*	*	*	*	*	*	*	*	*	*	*	*	*	*	*	*	*	*	*	*	*	*	*	*	*	*	*	*	*	*	*	*	*	*	*	*	*	*	*
23	Quintana Roo	5	Benito Juárez	1492	El Retiro	870727	210212	9	3	*	*	*	*	*	*	*	*	*	*	*	*	*	*	*	*	*	*	*	*	*	*	*	*	*	*	*	*	*	*	*	*	*	*	*	*	*	*	*	*
23	Quintana Roo	5	Benito Juárez	1494	Los Reyes	870521	211143	10	2	*	*	*	*	*	*	*	*	*	*	*	*	*	*	*	*	*	*	*	*	*	*	*	*	*	*	*	*	*	*	*	*	*	*	*	*	*	*	*	*
23	Quintana Roo	5	Benito Juárez	1495	Ríos de Agua Viva	871356	205841	10	1	*	*	*	*	*	*	*	*	*	*	*	*	*	*	*	*	*	*	*	*	*	*	*	*	*	*	*	*	*	*	*	*	*	*	*	*	*	*	*	*
23	Quintana Roo	5	Benito Juárez	1496	San Judas Tadeo	870536	210228	6	1	*	*	*	*	*	*	*	*	*	*	*	*	*	*	*	*	*	*	*	*	*	*	*	*	*	*	*	*	*	*	*	*	*	*	*	*	*	*	*	*
23	Quintana Roo	5	Benito Juárez	1497	San Pedro	871727	205723	10	6	*	*	*	*	*	*	*	*	*	*	*	*	*	*	*	*	*	*	*	*	*	*	*	*	*	*	*	*	*	*	*	*	*	*	*	*	*	*	*	*
23	Quintana Roo	5	Benito Juárez	1499	Segunda Entrada de Pozos	870606	210346	8	3	*	*	*	*	*	*	*	*	*	*	*	*	*	*	*	*	*	*	*	*	*	*	*	*	*	*	*	*	*	*	*	*	*	*	*	*	*	*	*	*
23	Quintana Roo	5	Benito Juárez	1500	La Siembra	870745	210253	8	1	*	*	*	*	*	*	*	*	*	*	*	*	*	*	*	*	*	*	*	*	*	*	*	*	*	*	*	*	*	*	*	*	*	*	*	*	*	*	*	*
23	Quintana Roo	5	Benito Juárez	1501	Sinaí	870634	210159	7	4	*	*	*	*	*	*	*	*	*	*	*	*	*	*	*	*	*	*	*	*	*	*	*	*	*	*	*	*	*	*	*	*	*	*	*	*	*	*	*	*
23	Quintana Roo	5	Benito Juárez	1502	Sinaí	871607	205755	10	5	*	*	*	*	*	*	*	*	*	*	*	*	*	*	*	*	*	*	*	*	*	*	*	*	*	*	*	*	*	*	*	*	*	*	*	*	*	*	*	*
23	Quintana Roo	5	Benito Juárez	1503	Tres Marías	870241	210357	6	14	7	7	3	1	2	11	6	5	11	6	5	10	6	4	10	6	4	10	6	4	0	0	0	1	0	1	0	0	0	0	0	0	0	0	0	3	2	1	3	1
23	Quintana Roo	5	Benito Juárez	1508	Villa Morada	870541	210226	6	3	*	*	*	*	*	*	*	*	*	*	*	*	*	*	*	*	*	*	*	*	*	*	*	*	*	*	*	*	*	*	*	*	*	*	*	*	*	*	*	*
23	Quintana Roo	5	Benito Juárez	1509	Benito Juárez [Vivero Forestal]	870458	210402	6	4	*	*	*	*	*	*	*	*	*	*	*	*	*	*	*	*	*	*	*	*	*	*	*	*	*	*	*	*	*	*	*	*	*	*	*	*	*	*	*	*
23	Quintana Roo	5	Benito Juárez	1510	Ixora [Vivero]	871033	205959	6	2	*	*	*	*	*	*	*	*	*	*	*	*	*	*	*	*	*	*	*	*	*	*	*	*	*	*	*	*	*	*	*	*	*	*	*	*	*	*	*	*
23	Quintana Roo	5	Benito Juárez	9998	Localidades de una vivienda				641	401	240	32	18	14	574	365	209	551	352	199	480	312	168	451	294	157	427	277	150	31	18	13	63	35	28	66	39	27	29	18	11	24	17	7	60	33	27	113	63
23	Quintana Roo	5	Benito Juárez	9999	Localidades de dos viviendas				221	129	92	14	5	9	201	122	79	183	115	68	161	102	59	153	99	54	149	96	53	22	11	11	18	9	9	17	7	10	8	3	5	4	3	1	40	23	17	42	16
23	Quintana Roo	6	José María Morelos	0	Total del Municipio				36179	18506	17673	2314	1211	1103	33804	17268	16536	32122	16400	15722	26037	13332	12705	23365	11945	11420	20577	10506	10071	2477	1277	1200	5290	2659	2631	6247	3159	3088	2672	1387	1285	2788	1439	1349	4811	2347	2464	9082	2860
23	Quintana Roo	6	José María Morelos	1	Adolfo de la Huerta	884945	192500	70	107	54	53	5	3	2	101	51	50	93	47	46	75	40	35	68	37	31	59	33	26	8	4	4	18	7	11	23	8	15	7	3	4	9	4	5	12	6	6	25	8
23	Quintana Roo	6	José María Morelos	3	Adolfo López Mateos	884117	193755	40	309	148	161	24	14	10	285	134	151	271	130	141	218	104	114	195	93	102	170	81	89	20	4	16	47	26	21	58	30	28	23	11	12	25	12	13	46	19	27	89	14
23	Quintana Roo	6	José María Morelos	4	La Carolina	890317	193622	82	88	45	43	7	3	4	81	42	39	78	41	37	65	38	27	59	33	26	48	28	20	5	2	3	11	2	9	13	6	7	6	5	1	11	5	6	12	7	5	23	2
23	Quintana Roo	6	José María Morelos	10	Benito Juárez	884613	194238	60	110	54	56	5	1	4	105	53	52	105	53	52	89	47	42	82	42	40	74	36	38	1	0	1	15	6	9	19	9	10	7	5	2	8	6	2	16	9	7	29	12
23	Quintana Roo	6	José María Morelos	14	Bulukax	884620	195748	30	558	298	260	36	22	14	521	276	245	489	260	229	397	216	181	364	200	164	312	176	136	42	21	21	82	39	43	91	43	48	33	16	17	52	24	28	86	46	40	134	43
23	Quintana Roo	6	José María Morelos	15	Cafetal Grande	884918	194259	30	334	169	165	21	13	8	313	156	157	300	147	153	243	125	118	217	110	107	193	103	90	18	11	7	52	20	32	65	30	35	26	15	11	24	7	17	34	22	12	78	31
23	Quintana Roo	6	José María Morelos	16	Cafetalito	884752	194337	28	252	128	124	13	4	9	239	124	115	223	116	107	191	99	92	167	87	80	140	75	65	21	10	11	27	15	12	41	22	19	24	12	12	27	12	15	26	12	14	60	23
23	Quintana Roo	6	José María Morelos	18	Candelaria	885731	194411	55	963	503	460	78	41	37	885	462	423	847	442	405	708	368	340	637	321	316	547	271	276	48	25	23	129	69	60	161	99	62	71	47	24	90	50	40	120	54	66	247	75
23	Quintana Roo	6	José María Morelos	24	La Ceibita	884500	193950	60	3	3	0	0	0	0	3	3	0	3	3	0	3	3	0	3	3	0	3	3	0	0	0	0	0	0	0	0	0	0	0	0	0	0	0	0	0	0	0	0	2
23	Quintana Roo	6	José María Morelos	26	El Naranjal	884702	193831	50	662	340	322	49	22	27	613	318	295	585	305	280	449	236	213	402	216	186	340	186	154	50	27	23	114	55	59	131	59	72	47	20	27	62	30	32	83	46	37	148	45
23	Quintana Roo	6	José María Morelos	27	Othón P. Blanco	890018	193715	90	551	288	263	44	22	22	507	266	241	484	252	232	387	199	188	348	180	168	306	158	148	35	21	14	85	46	39	95	50	45	39	19	20	42	22	20	69	33	36	130	47
23	Quintana Roo	6	José María Morelos	33	Javier Rojo Gómez	883536	195312	40	48	26	22	4	2	2	44	24	20	41	22	19	33	18	15	30	15	15	29	14	15	3	2	1	8	4	4	9	6	3	3	3	0	1	1	0	6	1	5	10	6
23	Quintana Roo	6	José María Morelos	35	Sabán	883219	200202	30	2167	1126	1041	168	86	82	1991	1037	954	1886	978	908	1509	778	731	1347	702	645	1176	609	567	159	86	73	323	173	150	386	192	194	162	76	86	171	93	78	300	143	157	523	137
23	Quintana Roo	6	José María Morelos	36	Sabana San Francisco	890438	193253	80	154	83	71	7	5	2	147	78	69	139	72	67	101	53	48	88	47	41	81	44	37	12	10	2	34	15	19	38	16	22	13	6	7	7	3	4	9	5	4	31	17
23	Quintana Roo	6	José María Morelos	38	Saczuquil	885841	194706	50	414	211	203	12	7	5	402	204	198	386	195	191	328	169	159	302	154	148	269	138	131	22	12	10	52	23	29	64	30	34	26	15	11	33	16	17	57	23	34	117	42
23	Quintana Roo	6	José María Morelos	39	San Carlos	885622	193801	67	104	56	48	7	2	5	97	54	43	94	51	43	73	41	32	66	36	30	61	34	27	10	5	5	14	8	6	17	10	7	7	5	2	5	2	3	13	7	6	25	10
23	Quintana Roo	6	José María Morelos	40	San Diego	884348	195046	20	581	294	287	34	13	21	546	280	266	525	271	254	416	221	195	374	197	177	327	176	151	36	15	21	94	44	50	102	50	52	42	24	18	47	21	26	86	51	35	138	52
23	Quintana Roo	6	José María Morelos	48	Dos Aguadas	884157	193959	62	202	104	98	12	8	4	190	96	94	183	90	93	139	74	65	123	68	55	107	61	46	11	8	3	40	14	26	49	16	33	16	6	10	16	7	9	17	10	7	41	20
23	Quintana Roo	6	José María Morelos	51	Dziuché	884825	195352	36	2870	1463	1407	137	75	62	2724	1384	1340	2594	1322	1272	2156	1098	1058	1958	992	966	1738	870	868	186	94	92	382	192	190	442	230	212	198	106	92	220	122	98	364	189	175	708	314
23	Quintana Roo	6	José María Morelos	57	La Esperanza	883508	195149	40	636	320	316	34	19	15	602	301	301	573	288	285	448	226	222	390	198	192	337	166	171	45	19	26	109	56	53	135	66	69	58	28	30	53	32	21	85	39	46	156	48
23	Quintana Roo	6	José María Morelos	61	Gavilanes	884513	192929	70	299	151	148	18	8	10	281	143	138	264	135	129	212	112	100	192	103	89	170	94	76	23	9	14	46	22	24	51	23	28	20	9	11	22	9	13	27	16	11	69	26
23	Quintana Roo	6	José María Morelos	67	Huay Max	883131	200228	30	1399	730	669	98	54	44	1299	676	623	1226	635	591	946	489	457	832	436	396	737	377	360	109	63	46	244	124	120	282	145	137	114	53	61	95	59	36	202	98	104	313	97
23	Quintana Roo	6	José María Morelos	69	José María Morelos	884245	194446	31	11750	5843	5907	757	397	360	10971	5434	5537	10437	5167	5270	8591	4200	4391	7717	3754	3963	6816	3311	3505	787	402	385	1593	832	761	1927	968	959	874	446	428	901	443	458	1697	795	902	3233	801
23	Quintana Roo	6	José María Morelos	70	X-Querol	883658	200753	30	102	54	48	8	6	2	94	48	46	86	44	42	66	38	28	59	35	24	51	27	24	11	6	5	17	4	13	21	6	15	7	3	4	8	8	0	9	5	4	15	11
23	Quintana Roo	6	José María Morelos	71	Zafarrancho	885320	193050	77	328	183	145	19	14	5	309	169	140	292	158	134	226	127	99	195	105	90	164	89	75	28	16	12	55	26	29	72	39	33	31	22	9	31	16	15	49	28	21	74	19
23	Quintana Roo	6	José María Morelos	76	Kantemó	884822	195547	30	229	113	116	14	4	10	215	109	106	205	103	102	165	84	81	146	74	72	131	68	63	15	7	8	35	18	17	44	22	22	19	10	9	15	6	9	36	19	17	60	22
23	Quintana Roo	6	José María Morelos	90	Lázaro Cárdenas	884227	193544	48	152	79	73	7	5	2	145	74	71	136	69	67	108	57	51	94	53	41	81	47	34	14	7	7	23	10	13	29	13	16	14	4	10	13	6	7	22	12	10	36	12
23	Quintana Roo	6	José María Morelos	99	Mariano Matamoros	884506	193800	56	46	25	21	2	1	1	44	24	20	41	22	19	31	17	14	28	17	11	24	14	10	4	2	2	9	5	4	12	5	7	3	0	3	4	3	1	7	5	2	8	6
23	Quintana Roo	6	José María Morelos	100	El Martirio	885013	193828	58	69	35	34	5	2	3	64	33	31	61	33	28	52	28	24	45	22	23	41	20	21	4	1	3	8	4	4	13	9	4	7	6	1	4	2	2	13	5	8	19	5
23	Quintana Roo	6	José María Morelos	117	Pedro Moreno	884414	193159	60	80	37	43	7	3	4	73	34	39	67	31	36	51	22	29	45	20	25	40	20	20	10	6	4	12	6	6	14	5	9	6	2	4	5	0	5	2	0	2	20	9
23	Quintana Roo	6	José María Morelos	121	Piedras Negras	884749	192618	77	116	58	58	10	7	3	106	51	55	98	47	51	81	41	40	72	36	36	67	35	32	10	4	6	15	6	9	19	10	9	9	5	4	5	1	4	11	4	7	25	13
23	Quintana Roo	6	José María Morelos	130	Pozo Pirata	885324	193654	89	175	97	78	9	3	6	166	94	72	157	85	72	125	66	59	110	57	53	97	50	47	13	11	2	28	17	11	29	18	11	15	9	6	13	7	6	21	10	11	43	13
23	Quintana Roo	6	José María Morelos	133	La Presumida	884514	194803	21	1357	682	675	93	51	42	1263	631	632	1209	605	604	969	480	489	878	440	438	786	388	398	84	44	40	210	107	103	225	113	112	91	40	51	92	52	40	159	67	92	340	107
23	Quintana Roo	6	José María Morelos	135	Puerto Arturo	890401	193933	80	606	308	298	41	17	24	562	290	272	534	276	258	438	236	202	398	214	184	350	184	166	38	17	21	86	37	49	93	47	46	40	22	18	48	30	18	70	32	38	149	44
23	Quintana Roo	6	José María Morelos	141	Nueva Reforma	885127	194800	30	321	161	160	26	6	20	295	155	140	274	142	132	228	120	108	207	105	102	191	98	93	25	13	12	42	22	20	47	28	19	21	15	6	16	7	9	56	27	29	79	25
23	Quintana Roo	6	José María Morelos	146	Sacalaca	883542	200343	30	1010	507	503	46	26	20	959	478	481	908	452	456	742	377	365	657	333	324	570	292	278	68	35	33	149	66	83	179	83	96	85	44	41	87	41	46	113	58	55	249	85
23	Quintana Roo	6	José María Morelos	153	San Antonio Tuk	883248	194656	40	165	87	78	6	1	5	159	86	73	151	82	69	111	62	49	94	55	39	84	49	35	14	6	8	34	18	16	40	21	19	17	7	10	10	6	4	19	10	9	31	17
23	Quintana Roo	6	José María Morelos	167	San Felipe Primero	884958	194846	35	703	394	309	51	34	17	652	360	292	615	344	271	501	277	224	463	254	209	406	223	183	53	29	24	98	54	44	104	60	44	38	23	15	57	31	26	91	49	42	164	57
23	Quintana Roo	6	José María Morelos	168	San Felipe Segundo	885329	194942	40	223	115	108	26	11	15	197	104	93	183	97	86	140	74	66	124	65	59	108	58	50	22	10	12	35	20	15	40	25	15	16	9	7	16	7	9	26	15	11	51	12
23	Quintana Roo	6	José María Morelos	170	San Felipe Oriente	883736	195834	20	207	110	97	13	10	3	194	100	94	185	96	89	147	81	66	133	76	57	118	68	50	17	9	8	30	10	20	35	12	23	14	5	9	15	8	7	34	20	14	42	18
23	Quintana Roo	6	José María Morelos	185	San José de la Montaña	883639	194831	30	1	*	*	*	*	*	*	*	*	*	*	*	*	*	*	*	*	*	*	*	*	*	*	*	*	*	*	*	*	*	*	*	*	*	*	*	*	*	*	*	*
23	Quintana Roo	6	José María Morelos	195	Nuevo San Marcos	884644	195032	30	203	111	92	13	9	4	190	102	88	172	90	82	141	70	71	132	64	68	114	58	56	26	18	8	23	14	9	27	17	10	9	6	3	18	6	12	20	10	10	50	19
23	Quintana Roo	6	José María Morelos	217	Santa Gertrudis	884620	194800	20	899	458	441	56	32	24	843	426	417	808	413	395	667	350	317	607	311	296	549	274	275	58	26	32	118	50	68	146	76	70	60	39	21	58	37	21	131	47	84	234	79
23	Quintana Roo	6	José María Morelos	235	Santo Domingo	884244	194730	20	20	11	9	1	1	0	19	10	9	18	10	8	17	9	8	16	9	7	15	8	7	1	0	1	1	1	0	2	1	1	1	0	1	1	1	0	1	0	1	5	4
23	Quintana Roo	6	José María Morelos	241	Tabasco	884106	195843	30	263	138	125	20	9	11	243	129	114	231	123	108	195	107	88	176	96	80	151	83	68	13	7	6	35	15	20	46	22	24	19	11	8	25	13	12	33	19	14	62	25
23	Quintana Roo	6	José María Morelos	272	X-Cabil	882750	200954	30	1087	570	517	76	39	37	1011	531	480	953	501	452	739	398	341	665	358	307	594	320	274	85	44	41	187	89	98	197	100	97	74	40	34	71	38	33	133	70	63	240	80
23	Quintana Roo	6	José María Morelos	278	Kancabchén	885142	194250	30	1083	548	535	59	33	26	1023	515	508	970	481	489	777	390	387	698	347	351	604	304	300	77	42	35	169	83	86	196	104	92	79	43	36	94	43	51	135	61	74	282	81
23	Quintana Roo	6	José María Morelos	287	Insurgentes	884708	193538	78	69	35	34	5	4	1	64	31	33	58	28	30	44	22	22	40	20	20	33	18	15	7	4	3	13	5	8	13	5	8	4	2	2	7	2	5	6	3	3	18	4
23	Quintana Roo	6	José María Morelos	296	Plan de la Noria Poniente	884714	191834	60	233	134	99	17	10	7	210	122	88	205	120	85	160	95	65	144	86	58	132	77	55	6	2	4	44	25	19	51	29	22	16	9	7	12	9	3	31	25	6	47	18
23	Quintana Roo	6	José María Morelos	300	Rancho Viejo	883239	195441	36	50	26	24	0	0	0	50	26	24	49	25	24	41	24	17	34	22	12	28	19	9	3	2	1	6	0	6	13	2	11	7	2	5	6	3	3	6	6	0	8	7
23	Quintana Roo	6	José María Morelos	308	San Isidro Poniente	885318	191948	130	225	112	113	15	6	9	210	106	104	202	102	100	157	83	74	134	74	60	119	64	55	16	8	8	37	15	22	48	19	29	23	9	14	15	10	5	32	15	17	52	19
23	Quintana Roo	6	José María Morelos	330	El Triunfo	884552	192532	70	141	76	65	4	2	2	137	74	63	132	71	61	95	51	44	79	41	38	64	33	31	9	5	4	33	18	15	39	24	15	16	10	6	15	8	7	8	3	5	32	17
23	Quintana Roo	6	José María Morelos	331	Venustiano Carranza	884523	191628	35	184	100	84	14	3	11	170	97	73	155	89	66	121	70	51	111	61	50	101	57	44	20	10	10	29	17	12	26	16	10	10	9	1	10	4	6	25	12	13	42	21
23	Quintana Roo	6	José María Morelos	336	Colmenitas	884642	193014	89	40	20	20	3	1	2	37	19	18	36	19	17	29	14	15	27	13	14	24	12	12	2	0	2	6	5	1	3	2	1	2	1	1	3	1	2	9	4	5	12	1
23	Quintana Roo	6	José María Morelos	346	Juanas	890317	193030	90	1	*	*	*	*	*	*	*	*	*	*	*	*	*	*	*	*	*	*	*	*	*	*	*	*	*	*	*	*	*	*	*	*	*	*	*	*	*	*	*	*
23	Quintana Roo	6	José María Morelos	348	El Estribo	884553	194917	30	2	*	*	*	*	*	*	*	*	*	*	*	*	*	*	*	*	*	*	*	*	*	*	*	*	*	*	*	*	*	*	*	*	*	*	*	*	*	*	*	*
23	Quintana Roo	6	José María Morelos	350	La Herradura	884431	194729	15	1	*	*	*	*	*	*	*	*	*	*	*	*	*	*	*	*	*	*	*	*	*	*	*	*	*	*	*	*	*	*	*	*	*	*	*	*	*	*	*	*
23	Quintana Roo	6	José María Morelos	353	Las Palmas	884541	194857	20	1	*	*	*	*	*	*	*	*	*	*	*	*	*	*	*	*	*	*	*	*	*	*	*	*	*	*	*	*	*	*	*	*	*	*	*	*	*	*	*	*
23	Quintana Roo	6	José María Morelos	356	X-Peten Hay	884933	194950	30	1	*	*	*	*	*	*	*	*	*	*	*	*	*	*	*	*	*	*	*	*	*	*	*	*	*	*	*	*	*	*	*	*	*	*	*	*	*	*	*	*
23	Quintana Roo	6	José María Morelos	357	La Pimientita	884011	193015	60	260	145	115	15	10	5	245	135	110	228	127	101	180	100	80	153	89	64	134	79	55	23	11	12	42	24	18	57	26	31	27	11	16	19	10	9	24	17	7	54	16
23	Quintana Roo	6	José María Morelos	362	San Agustín	884222	195216	40	2	*	*	*	*	*	*	*	*	*	*	*	*	*	*	*	*	*	*	*	*	*	*	*	*	*	*	*	*	*	*	*	*	*	*	*	*	*	*	*	*
23	Quintana Roo	6	José María Morelos	370	San Francisco	883659	195233	40	1	*	*	*	*	*	*	*	*	*	*	*	*	*	*	*	*	*	*	*	*	*	*	*	*	*	*	*	*	*	*	*	*	*	*	*	*	*	*	*	*
23	Quintana Roo	6	José María Morelos	372	San Francisco de Castro	884941	194256	26	1	*	*	*	*	*	*	*	*	*	*	*	*	*	*	*	*	*	*	*	*	*	*	*	*	*	*	*	*	*	*	*	*	*	*	*	*	*	*	*	*
23	Quintana Roo	6	José María Morelos	378	San Juan Oriente	883636	200108	30	147	79	68	13	3	10	134	76	58	129	74	55	104	58	46	93	52	41	78	42	36	9	4	5	21	14	7	26	16	10	11	6	5	15	10	5	15	10	5	30	20
23	Quintana Roo	6	José María Morelos	383	San Nicolás	884541	194846	20	3	*	*	*	*	*	*	*	*	*	*	*	*	*	*	*	*	*	*	*	*	*	*	*	*	*	*	*	*	*	*	*	*	*	*	*	*	*	*	*	*
23	Quintana Roo	6	José María Morelos	385	San Pedro	883720	195239	40	1	*	*	*	*	*	*	*	*	*	*	*	*	*	*	*	*	*	*	*	*	*	*	*	*	*	*	*	*	*	*	*	*	*	*	*	*	*	*	*	*
23	Quintana Roo	6	José María Morelos	387	San Román	883344	195508	35	2	*	*	*	*	*	*	*	*	*	*	*	*	*	*	*	*	*	*	*	*	*	*	*	*	*	*	*	*	*	*	*	*	*	*	*	*	*	*	*	*
23	Quintana Roo	6	José María Morelos	393	Santa Amalia	884150	194110	60	2	*	*	*	*	*	*	*	*	*	*	*	*	*	*	*	*	*	*	*	*	*	*	*	*	*	*	*	*	*	*	*	*	*	*	*	*	*	*	*	*
23	Quintana Roo	6	José María Morelos	395	Santa Cruz	884658	195717	30	1	*	*	*	*	*	*	*	*	*	*	*	*	*	*	*	*	*	*	*	*	*	*	*	*	*	*	*	*	*	*	*	*	*	*	*	*	*	*	*	*
23	Quintana Roo	6	José María Morelos	396	Santa Elena	883555	200632	30	7	*	*	*	*	*	*	*	*	*	*	*	*	*	*	*	*	*	*	*	*	*	*	*	*	*	*	*	*	*	*	*	*	*	*	*	*	*	*	*	*
23	Quintana Roo	6	José María Morelos	398	Santa Lucía	884610	195001	25	3	*	*	*	*	*	*	*	*	*	*	*	*	*	*	*	*	*	*	*	*	*	*	*	*	*	*	*	*	*	*	*	*	*	*	*	*	*	*	*	*
23	Quintana Roo	6	José María Morelos	412	Xnoh Cruz	890954	193626	99	169	86	83	15	5	10	154	81	73	149	78	71	121	63	58	106	58	48	91	48	43	7	5	2	26	13	13	33	13	20	15	5	10	15	10	5	21	8	13	42	8
23	Quintana Roo	6	José María Morelos	414	Nuevo Plan de la Noria	883820	191719	30	268	142	126	18	11	7	250	131	119	238	124	114	194	102	92	173	88	85	150	78	72	13	7	6	43	22	21	50	30	20	21	14	7	23	10	13	36	17	19	70	20
23	Quintana Roo	6	José María Morelos	424	Monte Grande	885053	193033	125	6	*	*	*	*	*	*	*	*	*	*	*	*	*	*	*	*	*	*	*	*	*	*	*	*	*	*	*	*	*	*	*	*	*	*	*	*	*	*	*	*
23	Quintana Roo	6	José María Morelos	425	Aguada la Presumida	890113	192634	110	90	44	46	6	4	2	83	39	44	81	38	43	56	31	25	46	28	18	41	25	16	7	2	5	20	6	14	21	7	14	10	3	7	5	3	2	8	5	3	14	9
23	Quintana Roo	6	José María Morelos	431	Santa Margarita	885407	193748	88	6	*	*	*	*	*	*	*	*	*	*	*	*	*	*	*	*	*	*	*	*	*	*	*	*	*	*	*	*	*	*	*	*	*	*	*	*	*	*	*	*
23	Quintana Roo	6	José María Morelos	440	Mina de Oro	884632	193935	60	2	*	*	*	*	*	*	*	*	*	*	*	*	*	*	*	*	*	*	*	*	*	*	*	*	*	*	*	*	*	*	*	*	*	*	*	*	*	*	*	*
23	Quintana Roo	6	José María Morelos	441	Nuevo Cunduacán	885200	191613	68	37	19	18	1	0	1	36	19	17	33	18	15	26	15	11	23	13	10	20	12	8	4	1	3	6	3	3	8	5	3	3	2	1	3	1	2	4	2	2	9	2
23	Quintana Roo	6	José María Morelos	445	San Juan	884355	194653	20	5	*	*	*	*	*	*	*	*	*	*	*	*	*	*	*	*	*	*	*	*	*	*	*	*	*	*	*	*	*	*	*	*	*	*	*	*	*	*	*	*
23	Quintana Roo	6	José María Morelos	446	La Voluntad de Dios	884333	194722	16	5	*	*	*	*	*	*	*	*	*	*	*	*	*	*	*	*	*	*	*	*	*	*	*	*	*	*	*	*	*	*	*	*	*	*	*	*	*	*	*	*
23	Quintana Roo	6	José María Morelos	448	Rancho Vázquez	884307	194738	29	2	*	*	*	*	*	*	*	*	*	*	*	*	*	*	*	*	*	*	*	*	*	*	*	*	*	*	*	*	*	*	*	*	*	*	*	*	*	*	*	*
23	Quintana Roo	6	José María Morelos	452	Tres Palmas	884119	200017	40	2	*	*	*	*	*	*	*	*	*	*	*	*	*	*	*	*	*	*	*	*	*	*	*	*	*	*	*	*	*	*	*	*	*	*	*	*	*	*	*	*
23	Quintana Roo	6	José María Morelos	455	San Nicolás	884557	194849	30	5	*	*	*	*	*	*	*	*	*	*	*	*	*	*	*	*	*	*	*	*	*	*	*	*	*	*	*	*	*	*	*	*	*	*	*	*	*	*	*	*
23	Quintana Roo	6	José María Morelos	463	Las Moras	885938	192706	119	1	*	*	*	*	*	*	*	*	*	*	*	*	*	*	*	*	*	*	*	*	*	*	*	*	*	*	*	*	*	*	*	*	*	*	*	*	*	*	*	*
23	Quintana Roo	6	José María Morelos	471	San Salvador	885155	192753	73	3	*	*	*	*	*	*	*	*	*	*	*	*	*	*	*	*	*	*	*	*	*	*	*	*	*	*	*	*	*	*	*	*	*	*	*	*	*	*	*	*
23	Quintana Roo	6	José María Morelos	474	Camarones	885104	192955	119	12	*	*	*	*	*	*	*	*	*	*	*	*	*	*	*	*	*	*	*	*	*	*	*	*	*	*	*	*	*	*	*	*	*	*	*	*	*	*	*	*
23	Quintana Roo	6	José María Morelos	490	San Lorenzo	884558	194805	18	3	*	*	*	*	*	*	*	*	*	*	*	*	*	*	*	*	*	*	*	*	*	*	*	*	*	*	*	*	*	*	*	*	*	*	*	*	*	*	*	*
23	Quintana Roo	6	José María Morelos	505	Cacatziu	885830	194759	69	1	*	*	*	*	*	*	*	*	*	*	*	*	*	*	*	*	*	*	*	*	*	*	*	*	*	*	*	*	*	*	*	*	*	*	*	*	*	*	*	*
23	Quintana Roo	6	José María Morelos	508	Chantuk Águilas	883235	195344	40	1	*	*	*	*	*	*	*	*	*	*	*	*	*	*	*	*	*	*	*	*	*	*	*	*	*	*	*	*	*	*	*	*	*	*	*	*	*	*	*	*
23	Quintana Roo	6	José María Morelos	515	El Huanal	884920	191528	50	1	*	*	*	*	*	*	*	*	*	*	*	*	*	*	*	*	*	*	*	*	*	*	*	*	*	*	*	*	*	*	*	*	*	*	*	*	*	*	*	*
23	Quintana Roo	6	José María Morelos	518	Kankabchén	883732	192814	30	2	*	*	*	*	*	*	*	*	*	*	*	*	*	*	*	*	*	*	*	*	*	*	*	*	*	*	*	*	*	*	*	*	*	*	*	*	*	*	*	*
23	Quintana Roo	6	José María Morelos	519	Los Lagartos	885836	192700	94	30	20	10	1	1	0	29	19	10	29	19	10	24	15	9	21	13	8	19	11	8	1	0	1	4	4	0	7	6	1	3	2	1	2	2	0	7	5	2	6	3
23	Quintana Roo	6	José María Morelos	532	San Francisco	884045	195951	30	3	*	*	*	*	*	*	*	*	*	*	*	*	*	*	*	*	*	*	*	*	*	*	*	*	*	*	*	*	*	*	*	*	*	*	*	*	*	*	*	*
23	Quintana Roo	6	José María Morelos	545	San Salvador	885234	195112	40	3	*	*	*	*	*	*	*	*	*	*	*	*	*	*	*	*	*	*	*	*	*	*	*	*	*	*	*	*	*	*	*	*	*	*	*	*	*	*	*	*
23	Quintana Roo	6	José María Morelos	546	San Valerio	883601	195549	40	1	*	*	*	*	*	*	*	*	*	*	*	*	*	*	*	*	*	*	*	*	*	*	*	*	*	*	*	*	*	*	*	*	*	*	*	*	*	*	*	*
23	Quintana Roo	6	José María Morelos	560	Rancho Guadalupe	884524	194826	20	3	*	*	*	*	*	*	*	*	*	*	*	*	*	*	*	*	*	*	*	*	*	*	*	*	*	*	*	*	*	*	*	*	*	*	*	*	*	*	*	*
23	Quintana Roo	6	José María Morelos	566	Chan Tabasquito	884220	195850	30	2	*	*	*	*	*	*	*	*	*	*	*	*	*	*	*	*	*	*	*	*	*	*	*	*	*	*	*	*	*	*	*	*	*	*	*	*	*	*	*	*
23	Quintana Roo	6	José María Morelos	571	Garita Aduanal	884858	195413	32	4	*	*	*	*	*	*	*	*	*	*	*	*	*	*	*	*	*	*	*	*	*	*	*	*	*	*	*	*	*	*	*	*	*	*	*	*	*	*	*	*
23	Quintana Roo	6	José María Morelos	575	María de Jesús	884601	194809	17	2	*	*	*	*	*	*	*	*	*	*	*	*	*	*	*	*	*	*	*	*	*	*	*	*	*	*	*	*	*	*	*	*	*	*	*	*	*	*	*	*
23	Quintana Roo	6	José María Morelos	577	Francisco Villa	890149	192855	100	1	*	*	*	*	*	*	*	*	*	*	*	*	*	*	*	*	*	*	*	*	*	*	*	*	*	*	*	*	*	*	*	*	*	*	*	*	*	*	*	*
23	Quintana Roo	6	José María Morelos	581	Nachi Cocom	884041	192246	40	1	*	*	*	*	*	*	*	*	*	*	*	*	*	*	*	*	*	*	*	*	*	*	*	*	*	*	*	*	*	*	*	*	*	*	*	*	*	*	*	*
23	Quintana Roo	6	José María Morelos	588	San Ignacio	885429	193832	80	1	*	*	*	*	*	*	*	*	*	*	*	*	*	*	*	*	*	*	*	*	*	*	*	*	*	*	*	*	*	*	*	*	*	*	*	*	*	*	*	*
23	Quintana Roo	6	José María Morelos	594	San Luis Panal	890105	192924	110	3	*	*	*	*	*	*	*	*	*	*	*	*	*	*	*	*	*	*	*	*	*	*	*	*	*	*	*	*	*	*	*	*	*	*	*	*	*	*	*	*
23	Quintana Roo	6	José María Morelos	598	San Salvador Segundo	885158	195058	50	1	*	*	*	*	*	*	*	*	*	*	*	*	*	*	*	*	*	*	*	*	*	*	*	*	*	*	*	*	*	*	*	*	*	*	*	*	*	*	*	*
23	Quintana Roo	6	José María Morelos	608	Villa de Guadalupe	884230	194942	20	7	*	*	*	*	*	*	*	*	*	*	*	*	*	*	*	*	*	*	*	*	*	*	*	*	*	*	*	*	*	*	*	*	*	*	*	*	*	*	*	*
23	Quintana Roo	6	José María Morelos	616	El Lucero Dos	885540	193753	87	8	*	*	*	*	*	*	*	*	*	*	*	*	*	*	*	*	*	*	*	*	*	*	*	*	*	*	*	*	*	*	*	*	*	*	*	*	*	*	*	*
23	Quintana Roo	6	José María Morelos	639	Dos Aguadas	890638	194127	80	37	23	14	2	2	0	35	21	14	34	21	13	25	15	10	16	10	6	14	9	5	2	1	1	8	5	3	12	7	5	9	5	4	2	1	1	1	1	0	6	2
23	Quintana Roo	6	José María Morelos	649	Los Tres Reyes	884707	194912	35	1	*	*	*	*	*	*	*	*	*	*	*	*	*	*	*	*	*	*	*	*	*	*	*	*	*	*	*	*	*	*	*	*	*	*	*	*	*	*	*	*
23	Quintana Roo	6	José María Morelos	650	Chan X-Cunei	884146	200027	41	4	*	*	*	*	*	*	*	*	*	*	*	*	*	*	*	*	*	*	*	*	*	*	*	*	*	*	*	*	*	*	*	*	*	*	*	*	*	*	*	*
23	Quintana Roo	6	José María Morelos	654	X-Cunei	884141	200043	40	1	*	*	*	*	*	*	*	*	*	*	*	*	*	*	*	*	*	*	*	*	*	*	*	*	*	*	*	*	*	*	*	*	*	*	*	*	*	*	*	*
23	Quintana Roo	6	José María Morelos	656	La Herradura	884731	193022	110	2	*	*	*	*	*	*	*	*	*	*	*	*	*	*	*	*	*	*	*	*	*	*	*	*	*	*	*	*	*	*	*	*	*	*	*	*	*	*	*	*
23	Quintana Roo	6	José María Morelos	657	Su'ukil Naj	884447	194702	14	8	*	*	*	*	*	*	*	*	*	*	*	*	*	*	*	*	*	*	*	*	*	*	*	*	*	*	*	*	*	*	*	*	*	*	*	*	*	*	*	*
23	Quintana Roo	6	José María Morelos	659	Ninguno [Asociación Ganadera Local]	884202	194433	30	2	*	*	*	*	*	*	*	*	*	*	*	*	*	*	*	*	*	*	*	*	*	*	*	*	*	*	*	*	*	*	*	*	*	*	*	*	*	*	*	*
23	Quintana Roo	6	José María Morelos	660	Las Bugambilias	885224	194552	40	1	*	*	*	*	*	*	*	*	*	*	*	*	*	*	*	*	*	*	*	*	*	*	*	*	*	*	*	*	*	*	*	*	*	*	*	*	*	*	*	*
23	Quintana Roo	6	José María Morelos	661	Carlos Tuc	884450	194727	20	5	*	*	*	*	*	*	*	*	*	*	*	*	*	*	*	*	*	*	*	*	*	*	*	*	*	*	*	*	*	*	*	*	*	*	*	*	*	*	*	*
23	Quintana Roo	6	José María Morelos	663	Dziuché	884738	195325	26	4	3	1	0	0	0	4	3	1	4	3	1	4	3	1	4	3	1	4	3	1	0	0	0	0	0	0	0	0	0	0	0	0	0	0	0	0	0	0	1	1
23	Quintana Roo	6	José María Morelos	664	Dziuché	884727	195318	22	2	*	*	*	*	*	*	*	*	*	*	*	*	*	*	*	*	*	*	*	*	*	*	*	*	*	*	*	*	*	*	*	*	*	*	*	*	*	*	*	*
23	Quintana Roo	6	José María Morelos	667	Esperancita	884653	193429	77	1	*	*	*	*	*	*	*	*	*	*	*	*	*	*	*	*	*	*	*	*	*	*	*	*	*	*	*	*	*	*	*	*	*	*	*	*	*	*	*	*
23	Quintana Roo	6	José María Morelos	668	Los Girasoles	884655	194833	30	5	*	*	*	*	*	*	*	*	*	*	*	*	*	*	*	*	*	*	*	*	*	*	*	*	*	*	*	*	*	*	*	*	*	*	*	*	*	*	*	*
23	Quintana Roo	6	José María Morelos	669	Humberto Piña	884212	193723	55	2	*	*	*	*	*	*	*	*	*	*	*	*	*	*	*	*	*	*	*	*	*	*	*	*	*	*	*	*	*	*	*	*	*	*	*	*	*	*	*	*
23	Quintana Roo	6	José María Morelos	670	Juan Vázquez	884218	193708	50	3	*	*	*	*	*	*	*	*	*	*	*	*	*	*	*	*	*	*	*	*	*	*	*	*	*	*	*	*	*	*	*	*	*	*	*	*	*	*	*	*
23	Quintana Roo	6	José María Morelos	673	Ninguno	884152	194511	30	4	*	*	*	*	*	*	*	*	*	*	*	*	*	*	*	*	*	*	*	*	*	*	*	*	*	*	*	*	*	*	*	*	*	*	*	*	*	*	*	*
23	Quintana Roo	6	José María Morelos	675	Mis Angelitos	884220	193658	49	3	*	*	*	*	*	*	*	*	*	*	*	*	*	*	*	*	*	*	*	*	*	*	*	*	*	*	*	*	*	*	*	*	*	*	*	*	*	*	*	*
23	Quintana Roo	6	José María Morelos	676	Las Palmas	884535	194110	58	1	*	*	*	*	*	*	*	*	*	*	*	*	*	*	*	*	*	*	*	*	*	*	*	*	*	*	*	*	*	*	*	*	*	*	*	*	*	*	*	*
23	Quintana Roo	6	José María Morelos	677	El Paraíso Naciente	890010	193915	60	7	*	*	*	*	*	*	*	*	*	*	*	*	*	*	*	*	*	*	*	*	*	*	*	*	*	*	*	*	*	*	*	*	*	*	*	*	*	*	*	*
23	Quintana Roo	6	José María Morelos	678	Preciliano Martín Traconis	884315	194348	37	1	*	*	*	*	*	*	*	*	*	*	*	*	*	*	*	*	*	*	*	*	*	*	*	*	*	*	*	*	*	*	*	*	*	*	*	*	*	*	*	*
23	Quintana Roo	6	José María Morelos	682	San Cosme	884909	195416	31	2	*	*	*	*	*	*	*	*	*	*	*	*	*	*	*	*	*	*	*	*	*	*	*	*	*	*	*	*	*	*	*	*	*	*	*	*	*	*	*	*
23	Quintana Roo	6	José María Morelos	683	San Felipe III	890132	192742	110	2	*	*	*	*	*	*	*	*	*	*	*	*	*	*	*	*	*	*	*	*	*	*	*	*	*	*	*	*	*	*	*	*	*	*	*	*	*	*	*	*
23	Quintana Roo	6	José María Morelos	689	Los Tres Hermanos	884150	194518	30	6	3	3	0	0	0	6	3	3	6	3	3	6	3	3	6	3	3	6	3	3	0	0	0	0	0	0	0	0	0	0	0	0	0	0	0	0	0	0	1	4
23	Quintana Roo	6	José María Morelos	9998	Localidades de una vivienda				145	98	47	5	3	2	140	95	45	139	94	45	128	86	42	124	84	40	117	80	37	3	3	0	9	6	3	9	6	3	4	2	2	7	4	3	15	9	6	27	45
23	Quintana Roo	6	José María Morelos	9999	Localidades de dos viviendas				39	23	16	2	1	1	37	22	15	35	21	14	28	17	11	28	17	11	26	15	11	4	2	2	5	3	2	2	2	0	0	0	0	2	2	0	5	1	4	6	8
23	Quintana Roo	7	Lázaro Cárdenas	0	Total del Municipio				25333	12972	12361	1633	893	740	23635	12042	11593	22506	11468	11038	18532	9492	9040	16868	8646	8222	15165	7791	7374	1668	844	824	3435	1706	1729	4014	2004	2010	1664	846	818	1703	855	848	3298	1643	1655	6507	2094
23	Quintana Roo	7	Lázaro Cárdenas	1	Kantunilkín	872916	210610	20	7150	3582	3568	410	226	184	6733	3352	3381	6418	3193	3225	5326	2660	2666	4888	2453	2435	4423	2230	2193	489	247	242	918	445	473	1078	505	573	438	207	231	465	223	242	925	443	482	1920	582
23	Quintana Roo	7	Lázaro Cárdenas	2	Agua Azul	871932	205129	10	446	215	231	34	12	22	400	196	204	382	188	194	309	156	153	279	143	136	243	123	120	27	12	15	64	28	36	79	37	42	30	13	17	36	20	16	56	24	32	112	29
23	Quintana Roo	7	Lázaro Cárdenas	5	El Cedral	873304	205703	20	752	379	373	47	20	27	705	359	346	670	340	330	565	290	275	515	267	248	455	235	220	50	23	27	90	46	44	106	50	56	50	23	27	60	32	28	131	65	66	192	72
23	Quintana Roo	7	Lázaro Cárdenas	6	Cedralito Segundo	873300	205353	20	32	18	14	1	1	0	31	17	14	27	14	13	21	11	10	18	9	9	16	8	8	5	4	1	5	2	3	6	4	2	3	2	1	2	1	1	6	3	3	8	2
23	Quintana Roo	7	Lázaro Cárdenas	7	Cristóbal Colón	872045	205609	9	341	171	170	20	13	7	321	158	163	306	151	155	246	118	128	224	111	113	201	98	103	23	13	10	52	27	25	63	28	35	22	7	15	23	13	10	50	21	29	90	22
23	Quintana Roo	7	Lázaro Cárdenas	8	Chiquilá	872017	212532	3	1466	771	695	109	61	48	1347	705	642	1273	662	611	1042	546	496	945	498	447	853	452	401	97	54	43	208	105	103	233	118	115	97	48	49	92	46	46	183	92	91	365	82
23	Quintana Roo	7	Lázaro Cárdenas	9	Delirios	871132	205048	9	66	38	28	6	4	2	60	34	26	59	34	25	43	24	19	35	19	16	31	17	14	3	2	1	14	8	6	16	9	7	8	5	3	4	2	2	8	5	3	13	5
23	Quintana Roo	7	Lázaro Cárdenas	10	Esperanza	872351	205819	10	367	193	174	27	18	9	340	175	165	320	166	154	253	129	124	231	116	115	206	102	104	29	14	15	58	32	26	65	39	26	22	13	9	25	14	11	54	25	29	95	25
23	Quintana Roo	7	Lázaro Cárdenas	11	Héroe de Nacozari	871504	204619	9	110	54	56	12	4	8	92	47	45	83	42	41	62	34	28	57	32	25	52	30	22	12	7	5	18	6	12	14	4	10	5	2	3	5	2	3	20	12	8	19	5
23	Quintana Roo	7	Lázaro Cárdenas	12	Holbox	872236	213118	1	1486	771	715	96	50	46	1380	716	664	1326	684	642	1149	600	549	1071	560	511	1007	528	479	76	42	34	155	74	81	183	84	99	78	40	38	64	32	32	198	91	107	405	128
23	Quintana Roo	7	Lázaro Cárdenas	13	El Ideal	873242	205255	20	818	443	375	81	57	24	736	385	351	702	363	339	586	296	290	523	260	263	458	231	227	46	26	20	104	63	41	135	81	54	63	36	27	65	29	36	105	55	50	205	67
23	Quintana Roo	7	Lázaro Cárdenas	14	Juárez	871947	204922	10	199	102	97	8	5	3	191	97	94	186	95	91	147	75	72	131	65	66	115	59	56	10	4	6	34	18	16	37	21	16	16	10	6	16	6	10	18	11	7	52	19
23	Quintana Roo	7	Lázaro Cárdenas	15	El Naranjal	872834	204816	20	118	64	54	11	7	4	107	57	50	101	53	48	81	45	36	73	40	33	67	35	32	8	5	3	18	7	11	20	8	12	8	5	3	6	5	1	9	2	7	26	12
23	Quintana Roo	7	Lázaro Cárdenas	17	Nuevo Durango	873502	204319	26	225	114	111	7	5	2	218	109	109	209	106	103	160	80	80	142	70	72	127	64	63	17	8	9	41	21	20	42	21	21	18	10	8	15	6	9	24	11	13	55	27
23	Quintana Roo	7	Lázaro Cárdenas	18	Nuevo Xcán	873611	205209	26	1130	584	546	71	41	30	1058	542	516	1009	521	488	848	436	412	782	397	385	725	368	357	69	33	36	141	73	68	156	82	74	66	39	27	57	29	28	143	74	69	283	117
23	Quintana Roo	7	Lázaro Cárdenas	21	El Pocito	872858	205324	20	159	82	77	12	2	10	147	80	67	140	75	65	116	61	55	109	58	51	98	51	47	9	7	2	22	12	10	23	11	12	7	3	4	11	7	4	21	14	7	38	14
23	Quintana Roo	7	Lázaro Cárdenas	23	San Ángel	872600	211402	10	1041	538	503	49	28	21	991	510	481	948	486	462	768	393	375	679	360	319	603	321	282	73	41	32	150	76	74	191	87	104	89	33	56	76	39	37	143	78	65	253	93
23	Quintana Roo	7	Lázaro Cárdenas	25	San Cosme	873017	204830	12	361	192	169	21	15	6	340	177	163	326	170	156	258	130	128	235	120	115	207	105	102	25	13	12	57	34	23	60	31	29	23	10	13	28	15	13	53	26	27	90	18
23	Quintana Roo	7	Lázaro Cárdenas	26	San Eusebio	872009	212354	10	51	25	26	4	3	1	47	22	25	46	22	24	31	15	16	29	15	14	25	14	11	1	0	1	15	7	8	12	4	8	2	0	2	4	1	3	3	3	0	10	9
23	Quintana Roo	7	Lázaro Cárdenas	27	San Felipe	872350	205501	10	2	*	*	*	*	*	*	*	*	*	*	*	*	*	*	*	*	*	*	*	*	*	*	*	*	*	*	*	*	*	*	*	*	*	*	*	*	*	*	*	*
23	Quintana Roo	7	Lázaro Cárdenas	28	San Francisco	873017	204916	20	767	388	379	52	31	21	714	356	358	670	334	336	546	278	268	500	258	242	450	234	216	60	29	31	108	49	59	116	52	64	46	20	26	50	24	26	104	57	47	195	57
23	Quintana Roo	7	Lázaro Cárdenas	30	San Juan de Dios	873256	204610	20	360	190	170	20	13	7	339	176	163	332	172	160	265	138	127	235	122	113	210	109	101	14	8	6	60	30	30	75	39	36	30	16	14	25	13	12	43	20	23	90	39
23	Quintana Roo	7	Lázaro Cárdenas	31	San Lorenzo	871526	205056	10	177	97	80	11	7	4	166	90	76	162	87	75	134	71	63	118	57	61	105	51	54	7	4	3	25	15	10	33	23	10	16	14	2	13	6	7	19	9	10	50	10
23	Quintana Roo	7	Lázaro Cárdenas	32	San Luis	872646	205114	18	7	5	2	0	0	0	7	5	2	7	5	2	7	5	2	7	5	2	7	5	2	0	0	0	0	0	0	0	0	0	0	0	0	0	0	0	0	0	0	1	3
23	Quintana Roo	7	Lázaro Cárdenas	33	San Martiniano	871657	204945	8	206	104	102	12	7	5	194	97	97	187	93	94	136	70	66	124	62	62	104	53	51	13	8	5	45	19	26	43	21	22	12	8	4	20	9	11	19	11	8	50	17
23	Quintana Roo	7	Lázaro Cárdenas	35	San Román	872750	205136	10	110	63	47	10	7	3	100	56	44	95	54	41	80	45	35	73	41	32	65	34	31	6	3	3	14	8	6	17	9	8	7	4	3	8	7	1	22	13	9	22	13
23	Quintana Roo	7	Lázaro Cárdenas	38	Solferino	872544	212108	10	799	408	391	38	19	19	758	388	370	724	373	351	615	318	297	558	291	267	505	260	245	45	18	27	98	52	46	133	70	63	57	27	30	53	31	22	85	42	43	201	92
23	Quintana Roo	7	Lázaro Cárdenas	39	El Tintal	872758	205331	10	1074	539	535	87	45	42	985	492	493	930	466	464	739	379	360	660	339	321	584	301	283	77	35	42	169	78	91	202	96	106	79	40	39	76	38	38	138	66	72	264	71
23	Quintana Roo	7	Lázaro Cárdenas	40	Tres Reyes	873539	204140	23	386	199	187	17	9	8	368	189	179	347	179	168	295	155	140	267	140	127	243	129	114	29	14	15	44	20	24	55	28	27	28	15	13	24	11	13	53	28	25	102	35
23	Quintana Roo	7	Lázaro Cárdenas	41	Nuevo Valladolid	871933	205642	10	1294	668	626	81	42	39	1213	626	587	1154	598	556	945	491	454	848	437	411	752	384	368	84	37	47	184	98	86	221	128	93	97	54	43	96	53	43	179	86	93	331	93
23	Quintana Roo	7	Lázaro Cárdenas	42	Guadalupe Victoria	871644	204724	10	95	44	51	13	5	8	82	39	43	75	36	39	61	32	29	56	28	28	49	27	22	8	3	5	13	4	9	12	6	6	5	4	1	7	1	6	17	8	9	22	3
23	Quintana Roo	7	Lázaro Cárdenas	43	Ignacio Zaragoza	873130	205254	20	2213	1122	1091	146	71	75	2067	1051	1016	1968	1004	964	1616	830	786	1454	737	717	1279	642	637	147	73	74	304	148	156	370	194	176	162	93	69	175	95	80	264	139	125	585	167
23	Quintana Roo	7	Lázaro Cárdenas	52	La Ermita	873259	205556	20	4	*	*	*	*	*	*	*	*	*	*	*	*	*	*	*	*	*	*	*	*	*	*	*	*	*	*	*	*	*	*	*	*	*	*	*	*	*	*	*	*
23	Quintana Roo	7	Lázaro Cárdenas	61	San Casimiro	872345	205502	10	1	*	*	*	*	*	*	*	*	*	*	*	*	*	*	*	*	*	*	*	*	*	*	*	*	*	*	*	*	*	*	*	*	*	*	*	*	*	*	*	*
23	Quintana Roo	7	Lázaro Cárdenas	63	San Javier	872551	205409	10	3	*	*	*	*	*	*	*	*	*	*	*	*	*	*	*	*	*	*	*	*	*	*	*	*	*	*	*	*	*	*	*	*	*	*	*	*	*	*	*	*
23	Quintana Roo	7	Lázaro Cárdenas	66	San Juan	872410	205425	10	1	*	*	*	*	*	*	*	*	*	*	*	*	*	*	*	*	*	*	*	*	*	*	*	*	*	*	*	*	*	*	*	*	*	*	*	*	*	*	*	*
23	Quintana Roo	7	Lázaro Cárdenas	73	Santa Melva	872502	205426	10	40	24	16	1	1	0	39	23	16	36	21	15	27	16	11	26	15	11	25	15	10	5	4	1	7	3	4	6	3	3	1	1	0	1	0	1	0	0	0	5	8
23	Quintana Roo	7	Lázaro Cárdenas	78	Tres Marías	871314	205053	10	54	26	28	5	2	3	49	24	25	46	22	24	36	15	21	34	15	19	32	15	17	4	3	1	9	6	3	7	4	3	2	0	2	2	0	2	8	2	6	16	4
23	Quintana Roo	7	Lázaro Cárdenas	95	Arizona	872759	205449	10	1	*	*	*	*	*	*	*	*	*	*	*	*	*	*	*	*	*	*	*	*	*	*	*	*	*	*	*	*	*	*	*	*	*	*	*	*	*	*	*	*
23	Quintana Roo	7	Lázaro Cárdenas	111	Pocito	873259	203902	20	2	*	*	*	*	*	*	*	*	*	*	*	*	*	*	*	*	*	*	*	*	*	*	*	*	*	*	*	*	*	*	*	*	*	*	*	*	*	*	*	*
23	Quintana Roo	7	Lázaro Cárdenas	114	La Esmeralda	872611	205408	10	1	*	*	*	*	*	*	*	*	*	*	*	*	*	*	*	*	*	*	*	*	*	*	*	*	*	*	*	*	*	*	*	*	*	*	*	*	*	*	*	*
23	Quintana Roo	7	Lázaro Cárdenas	115	La Esperanza	873809	204725	30	1	*	*	*	*	*	*	*	*	*	*	*	*	*	*	*	*	*	*	*	*	*	*	*	*	*	*	*	*	*	*	*	*	*	*	*	*	*	*	*	*
23	Quintana Roo	7	Lázaro Cárdenas	137	Santa Rosa	872114	205223	9	3	*	*	*	*	*	*	*	*	*	*	*	*	*	*	*	*	*	*	*	*	*	*	*	*	*	*	*	*	*	*	*	*	*	*	*	*	*	*	*	*
23	Quintana Roo	7	Lázaro Cárdenas	139	Pacchen	873523	203812	24	131	66	65	12	8	4	119	58	61	110	56	54	84	43	41	83	42	41	75	40	35	15	5	10	20	10	10	14	7	7	1	1	0	8	2	6	24	13	11	35	11
23	Quintana Roo	7	Lázaro Cárdenas	150	Poxil	873231	203936	20	14	8	6	0	0	0	14	8	6	14	8	6	12	7	5	10	5	5	7	4	3	0	0	0	2	1	1	4	3	1	2	2	0	3	1	2	2	1	1	5	1
23	Quintana Roo	7	Lázaro Cárdenas	154	San Agustín Primero	872939	205314	20	6	*	*	*	*	*	*	*	*	*	*	*	*	*	*	*	*	*	*	*	*	*	*	*	*	*	*	*	*	*	*	*	*	*	*	*	*	*	*	*	*
23	Quintana Roo	7	Lázaro Cárdenas	159	San Antonio	873153	204902	20	61	30	31	4	1	3	57	29	28	54	27	27	45	23	22	40	21	19	38	20	18	4	2	2	8	4	4	10	4	6	5	2	3	2	1	1	10	5	5	18	4
23	Quintana Roo	7	Lázaro Cárdenas	179	Vicente Guerrero	872932	205859	10	552	295	257	33	20	13	519	275	244	498	264	234	414	218	196	385	203	182	346	185	161	34	19	15	71	38	33	77	39	38	29	15	14	39	18	21	84	46	38	136	67
23	Quintana Roo	7	Lázaro Cárdenas	191	Rancho Talismán	873010	205302	20	21	*	*	*	*	*	*	*	*	*	*	*	*	*	*	*	*	*	*	*	*	*	*	*	*	*	*	*	*	*	*	*	*	*	*	*	*	*	*	*	*
23	Quintana Roo	7	Lázaro Cárdenas	194	Santo Domingo	872300	205517	10	297	148	149	39	19	20	258	129	129	239	122	117	202	107	95	192	100	92	173	92	81	21	9	12	35	13	22	34	17	17	10	7	3	19	8	11	41	23	18	74	29
23	Quintana Roo	7	Lázaro Cárdenas	196	Villa de Guadalupe	872334	205501	10	7	*	*	*	*	*	*	*	*	*	*	*	*	*	*	*	*	*	*	*	*	*	*	*	*	*	*	*	*	*	*	*	*	*	*	*	*	*	*	*	*
23	Quintana Roo	7	Lázaro Cárdenas	203	El Edén	871000	211142	5	3	*	*	*	*	*	*	*	*	*	*	*	*	*	*	*	*	*	*	*	*	*	*	*	*	*	*	*	*	*	*	*	*	*	*	*	*	*	*	*	*
23	Quintana Roo	7	Lázaro Cárdenas	241	San José	872346	205518	10	5	*	*	*	*	*	*	*	*	*	*	*	*	*	*	*	*	*	*	*	*	*	*	*	*	*	*	*	*	*	*	*	*	*	*	*	*	*	*	*	*
23	Quintana Roo	7	Lázaro Cárdenas	268	Centro de Investigaciones	871135	211238	5	3	*	*	*	*	*	*	*	*	*	*	*	*	*	*	*	*	*	*	*	*	*	*	*	*	*	*	*	*	*	*	*	*	*	*	*	*	*	*	*	*
23	Quintana Roo	7	Lázaro Cárdenas	270	San Candelario	872023	212334	10	2	*	*	*	*	*	*	*	*	*	*	*	*	*	*	*	*	*	*	*	*	*	*	*	*	*	*	*	*	*	*	*	*	*	*	*	*	*	*	*	*
23	Quintana Roo	7	Lázaro Cárdenas	279	Guadalupe	873530	205242	29	5	*	*	*	*	*	*	*	*	*	*	*	*	*	*	*	*	*	*	*	*	*	*	*	*	*	*	*	*	*	*	*	*	*	*	*	*	*	*	*	*
23	Quintana Roo	7	Lázaro Cárdenas	287	Ninguno	873046	210713	16	24	12	12	1	1	0	23	11	12	22	11	11	20	10	10	15	9	6	14	8	6	1	0	1	2	1	1	6	1	5	5	1	4	1	1	0	3	2	1	5	1
23	Quintana Roo	7	Lázaro Cárdenas	298	Laguna Costa Rica	872051	204244	10	14	10	4	0	0	0	14	10	4	14	10	4	13	9	4	13	9	4	13	9	4	0	0	0	1	1	0	1	1	0	0	0	0	0	0	0	1	0	1	2	6
23	Quintana Roo	7	Lázaro Cárdenas	306	Platanal	873732	204656	30	2	*	*	*	*	*	*	*	*	*	*	*	*	*	*	*	*	*	*	*	*	*	*	*	*	*	*	*	*	*	*	*	*	*	*	*	*	*	*	*	*
23	Quintana Roo	7	Lázaro Cárdenas	318	San Javier	873242	205244	20	2	*	*	*	*	*	*	*	*	*	*	*	*	*	*	*	*	*	*	*	*	*	*	*	*	*	*	*	*	*	*	*	*	*	*	*	*	*	*	*	*
23	Quintana Roo	7	Lázaro Cárdenas	321	San Mateo	873329	205236	22	2	*	*	*	*	*	*	*	*	*	*	*	*	*	*	*	*	*	*	*	*	*	*	*	*	*	*	*	*	*	*	*	*	*	*	*	*	*	*	*	*
23	Quintana Roo	7	Lázaro Cárdenas	339	San Antonio	873242	205351	20	1	*	*	*	*	*	*	*	*	*	*	*	*	*	*	*	*	*	*	*	*	*	*	*	*	*	*	*	*	*	*	*	*	*	*	*	*	*	*	*	*
23	Quintana Roo	7	Lázaro Cárdenas	341	Chunyaxché	872556	211917	10	5	*	*	*	*	*	*	*	*	*	*	*	*	*	*	*	*	*	*	*	*	*	*	*	*	*	*	*	*	*	*	*	*	*	*	*	*	*	*	*	*
23	Quintana Roo	7	Lázaro Cárdenas	355	Santa Rosa	873509	205419	30	6	*	*	*	*	*	*	*	*	*	*	*	*	*	*	*	*	*	*	*	*	*	*	*	*	*	*	*	*	*	*	*	*	*	*	*	*	*	*	*	*
23	Quintana Roo	7	Lázaro Cárdenas	357	Blanca Flor	873156	204005	19	3	*	*	*	*	*	*	*	*	*	*	*	*	*	*	*	*	*	*	*	*	*	*	*	*	*	*	*	*	*	*	*	*	*	*	*	*	*	*	*	*
23	Quintana Roo	7	Lázaro Cárdenas	367	San José Chumpús	872037	211215	10	3	*	*	*	*	*	*	*	*	*	*	*	*	*	*	*	*	*	*	*	*	*	*	*	*	*	*	*	*	*	*	*	*	*	*	*	*	*	*	*	*
23	Quintana Roo	7	Lázaro Cárdenas	372	Los Aluxes	872551	205416	10	9	4	5	0	0	0	9	4	5	9	4	5	9	4	5	8	4	4	8	4	4	0	0	0	0	0	0	1	0	1	1	0	1	0	0	0	3	1	2	2	2
23	Quintana Roo	7	Lázaro Cárdenas	378	Chechen Ha	870604	211855	10	5	*	*	*	*	*	*	*	*	*	*	*	*	*	*	*	*	*	*	*	*	*	*	*	*	*	*	*	*	*	*	*	*	*	*	*	*	*	*	*	*
23	Quintana Roo	7	Lázaro Cárdenas	379	La Gran Familia	872019	212454	8	4	*	*	*	*	*	*	*	*	*	*	*	*	*	*	*	*	*	*	*	*	*	*	*	*	*	*	*	*	*	*	*	*	*	*	*	*	*	*	*	*
23	Quintana Roo	7	Lázaro Cárdenas	389	Constituyentes del Setenta y Cuatro	872605	204116	11	81	45	36	11	7	4	70	38	32	67	35	32	44	26	18	37	20	17	29	16	13	8	6	2	18	6	12	19	11	8	7	6	1	8	4	4	4	3	1	14	3
23	Quintana Roo	7	Lázaro Cárdenas	390	Banco de Cenotes	873700	204003	20	18	11	7	0	0	0	18	11	7	18	11	7	16	10	6	14	8	6	12	8	4	0	0	0	2	1	1	4	3	1	2	2	0	2	0	2	2	2	0	4	3
23	Quintana Roo	7	Lázaro Cárdenas	392	Esmeralda	873635	204202	20	19	10	9	0	0	0	19	10	9	17	8	9	16	8	8	16	8	8	15	8	7	2	2	0	1	0	1	1	0	1	0	0	0	1	0	1	6	3	3	6	1
23	Quintana Roo	7	Lázaro Cárdenas	393	Guadalupe	873710	204318	25	49	28	21	3	3	0	46	25	21	42	23	19	31	18	13	25	15	10	21	12	9	5	2	3	10	5	5	12	7	5	6	3	3	4	3	1	6	3	3	10	1
23	Quintana Roo	7	Lázaro Cárdenas	394	Laguna Chabela	873657	203946	20	11	8	3	1	1	0	10	7	3	10	7	3	10	7	3	8	5	3	7	4	3	0	0	0	0	0	0	2	2	0	2	2	0	1	1	0	3	2	1	3	0
23	Quintana Roo	7	Lázaro Cárdenas	395	San Francisco	873647	204200	10	4	*	*	*	*	*	*	*	*	*	*	*	*	*	*	*	*	*	*	*	*	*	*	*	*	*	*	*	*	*	*	*	*	*	*	*	*	*	*	*	*
23	Quintana Roo	7	Lázaro Cárdenas	396	Santa Martha	874116	204309	28	3	*	*	*	*	*	*	*	*	*	*	*	*	*	*	*	*	*	*	*	*	*	*	*	*	*	*	*	*	*	*	*	*	*	*	*	*	*	*	*	*
23	Quintana Roo	7	Lázaro Cárdenas	399	Yokdzonot	873952	204000	20	13	5	8	1	0	1	12	5	7	11	4	7	9	3	6	8	3	5	6	2	4	1	1	0	2	1	1	2	0	2	1	0	1	2	1	1	0	0	0	3	1
23	Quintana Roo	7	Lázaro Cárdenas	400	Colonia CAPA	872950	210600	15	5	*	*	*	*	*	*	*	*	*	*	*	*	*	*	*	*	*	*	*	*	*	*	*	*	*	*	*	*	*	*	*	*	*	*	*	*	*	*	*	*
23	Quintana Roo	7	Lázaro Cárdenas	402	San Marco	872358	205346	10	1	*	*	*	*	*	*	*	*	*	*	*	*	*	*	*	*	*	*	*	*	*	*	*	*	*	*	*	*	*	*	*	*	*	*	*	*	*	*	*	*
23	Quintana Roo	7	Lázaro Cárdenas	404	Ninguno	873712	203942	20	11	*	*	*	*	*	*	*	*	*	*	*	*	*	*	*	*	*	*	*	*	*	*	*	*	*	*	*	*	*	*	*	*	*	*	*	*	*	*	*	*
23	Quintana Roo	7	Lázaro Cárdenas	405	San Benito	873453	205223	27	5	*	*	*	*	*	*	*	*	*	*	*	*	*	*	*	*	*	*	*	*	*	*	*	*	*	*	*	*	*	*	*	*	*	*	*	*	*	*	*	*
23	Quintana Roo	7	Lázaro Cárdenas	407	Villa Infantil Maya	873325	205230	21	7	*	*	*	*	*	*	*	*	*	*	*	*	*	*	*	*	*	*	*	*	*	*	*	*	*	*	*	*	*	*	*	*	*	*	*	*	*	*	*	*
23	Quintana Roo	7	Lázaro Cárdenas	9998	Localidades de una vivienda				93	56	37	4	2	2	80	49	31	78	47	31	66	42	24	61	39	22	55	34	21	5	2	3	9	5	4	11	7	4	5	3	2	6	5	1	4	1	3	15	18
23	Quintana Roo	7	Lázaro Cárdenas	9999	Localidades de dos viviendas				47	23	24	5	0	5	42	23	19	39	22	17	28	15	13	27	15	12	24	15	9	4	2	2	10	6	4	7	5	2	1	0	1	3	0	3	4	2	2	10	6
23	Quintana Roo	8	Solidaridad	0	Total del Municipio				159310	83468	75842	11044	5526	5518	145713	76646	69067	138569	73125	65444	119352	63481	55871	112955	60286	52669	105814	56616	49198	10191	5037	5154	16170	8128	8042	16745	8411	8334	6397	3195	3202	7141	3670	3471	27857	14577	13280	47941	3639
23	Quintana Roo	8	Solidaridad	1	Playa del Carmen	870452	203739	10	149923	78169	71754	10452	5241	5211	137190	71771	65419	130433	68442	61991	112182	59290	52892	106094	56251	49843	99325	52792	46533	9645	4767	4878	15363	7714	7649	15925	7989	7936	6088	3039	3049	6769	3459	3310	25733	13358	12375	45352	3427
23	Quintana Roo	8	Solidaridad	52	Los Cinco Hermanos	865832	204515	10	4	*	*	*	*	*	*	*	*	*	*	*	*	*	*	*	*	*	*	*	*	*	*	*	*	*	*	*	*	*	*	*	*	*	*	*	*	*	*	*	*
23	Quintana Roo	8	Solidaridad	59	Conchita Paa Mul	871139	203111	1	4	*	*	*	*	*	*	*	*	*	*	*	*	*	*	*	*	*	*	*	*	*	*	*	*	*	*	*	*	*	*	*	*	*	*	*	*	*	*	*	*
23	Quintana Roo	8	Solidaridad	60	Mateo y Juana	871144	203107	1	5	*	*	*	*	*	*	*	*	*	*	*	*	*	*	*	*	*	*	*	*	*	*	*	*	*	*	*	*	*	*	*	*	*	*	*	*	*	*	*	*
23	Quintana Roo	8	Solidaridad	69	Tres Hermanos	870054	204524	9	3	*	*	*	*	*	*	*	*	*	*	*	*	*	*	*	*	*	*	*	*	*	*	*	*	*	*	*	*	*	*	*	*	*	*	*	*	*	*	*	*
23	Quintana Roo	8	Solidaridad	79	La Paz	870126	204608	9	2	*	*	*	*	*	*	*	*	*	*	*	*	*	*	*	*	*	*	*	*	*	*	*	*	*	*	*	*	*	*	*	*	*	*	*	*	*	*	*	*
23	Quintana Roo	8	Solidaridad	102	Honduras	870040	204512	9	1	*	*	*	*	*	*	*	*	*	*	*	*	*	*	*	*	*	*	*	*	*	*	*	*	*	*	*	*	*	*	*	*	*	*	*	*	*	*	*	*
23	Quintana Roo	8	Solidaridad	107	Santa Teresita del Niño Jesús	870155	204541	9	1	*	*	*	*	*	*	*	*	*	*	*	*	*	*	*	*	*	*	*	*	*	*	*	*	*	*	*	*	*	*	*	*	*	*	*	*	*	*	*	*
23	Quintana Roo	8	Solidaridad	109	La Nueva Era	870118	204636	9	5	*	*	*	*	*	*	*	*	*	*	*	*	*	*	*	*	*	*	*	*	*	*	*	*	*	*	*	*	*	*	*	*	*	*	*	*	*	*	*	*
23	Quintana Roo	8	Solidaridad	119	Alfredo Canché	871819	202524	15	1	*	*	*	*	*	*	*	*	*	*	*	*	*	*	*	*	*	*	*	*	*	*	*	*	*	*	*	*	*	*	*	*	*	*	*	*	*	*	*	*
23	Quintana Roo	8	Solidaridad	138	El Dorado	871623	202713	7	131	104	27	0	0	0	131	104	27	131	104	27	131	104	27	131	104	27	125	100	25	0	0	0	0	0	0	0	0	0	0	0	0	6	4	2	74	56	18	27	0
23	Quintana Roo	8	Solidaridad	162	Los Picapiedra	871435	202947	7	2	*	*	*	*	*	*	*	*	*	*	*	*	*	*	*	*	*	*	*	*	*	*	*	*	*	*	*	*	*	*	*	*	*	*	*	*	*	*	*	*
23	Quintana Roo	8	Solidaridad	179	Paa Mul	871133	203121	1	29	16	13	0	0	0	29	16	13	29	16	13	26	15	11	24	13	11	23	12	11	0	0	0	3	1	2	4	2	2	2	2	0	1	1	0	0	0	0	2	11
23	Quintana Roo	8	Solidaridad	180	El Palomar	870018	204511	9	1	*	*	*	*	*	*	*	*	*	*	*	*	*	*	*	*	*	*	*	*	*	*	*	*	*	*	*	*	*	*	*	*	*	*	*	*	*	*	*	*
23	Quintana Roo	8	Solidaridad	183	Paraíso	871426	202955	8	21	10	11	0	0	0	21	10	11	20	9	11	14	7	7	13	6	7	13	6	7	1	1	0	6	2	4	5	3	2	1	1	0	0	0	0	1	0	1	6	2
23	Quintana Roo	8	Solidaridad	189	El Caracol (El Pedregal)	871253	203051	4	6	*	*	*	*	*	*	*	*	*	*	*	*	*	*	*	*	*	*	*	*	*	*	*	*	*	*	*	*	*	*	*	*	*	*	*	*	*	*	*	*
23	Quintana Roo	8	Solidaridad	195	El Pícaro	870147	204158	10	3	*	*	*	*	*	*	*	*	*	*	*	*	*	*	*	*	*	*	*	*	*	*	*	*	*	*	*	*	*	*	*	*	*	*	*	*	*	*	*	*
23	Quintana Roo	8	Solidaridad	200	Playa del Secreto	865635	204643	1	28	16	12	1	1	0	27	15	12	26	15	11	24	14	10	23	13	10	22	12	10	1	0	1	2	1	1	3	2	1	1	1	0	1	1	0	8	3	5	8	3
23	Quintana Roo	8	Solidaridad	201	Iberostar	865729	204533	2	242	151	91	4	2	2	237	149	88	234	147	87	228	146	82	228	146	82	223	141	82	5	2	3	4	1	3	1	0	1	0	0	0	5	5	0	95	60	35	81	0
23	Quintana Roo	8	Solidaridad	213	Puerto Chile	871600	202818	7	12	*	*	*	*	*	*	*	*	*	*	*	*	*	*	*	*	*	*	*	*	*	*	*	*	*	*	*	*	*	*	*	*	*	*	*	*	*	*	*	*
23	Quintana Roo	8	Solidaridad	217	Punta Maroma	865803	204416	2	58	27	31	4	1	3	53	25	28	53	25	28	48	23	25	43	21	22	41	20	21	0	0	0	5	2	3	7	3	4	5	2	3	2	1	1	10	4	6	21	2
23	Quintana Roo	8	Solidaridad	232	El Ranchito	870723	203505	10	10	*	*	*	*	*	*	*	*	*	*	*	*	*	*	*	*	*	*	*	*	*	*	*	*	*	*	*	*	*	*	*	*	*	*	*	*	*	*	*	*
23	Quintana Roo	8	Solidaridad	236	Sagrado Corazón de Jesús	871819	202529	15	4	*	*	*	*	*	*	*	*	*	*	*	*	*	*	*	*	*	*	*	*	*	*	*	*	*	*	*	*	*	*	*	*	*	*	*	*	*	*	*	*
23	Quintana Roo	8	Solidaridad	241	San Antonio	871809	202543	15	15	11	4	0	0	0	15	11	4	15	11	4	15	11	4	14	10	4	12	8	4	0	0	0	0	0	0	1	1	0	1	1	0	2	2	0	1	1	0	3	2
23	Quintana Roo	8	Solidaridad	246	San Carlos (Kilómetro Cuarenta y Cinco)	865652	204724	3	1	*	*	*	*	*	*	*	*	*	*	*	*	*	*	*	*	*	*	*	*	*	*	*	*	*	*	*	*	*	*	*	*	*	*	*	*	*	*	*	*
23	Quintana Roo	8	Solidaridad	248	San Diego	865926	204440	10	1	*	*	*	*	*	*	*	*	*	*	*	*	*	*	*	*	*	*	*	*	*	*	*	*	*	*	*	*	*	*	*	*	*	*	*	*	*	*	*	*
23	Quintana Roo	8	Solidaridad	263	Don Papi	871723	202709	15	1	*	*	*	*	*	*	*	*	*	*	*	*	*	*	*	*	*	*	*	*	*	*	*	*	*	*	*	*	*	*	*	*	*	*	*	*	*	*	*	*
23	Quintana Roo	8	Solidaridad	264	San José Ichtzel	870022	204345	10	1	*	*	*	*	*	*	*	*	*	*	*	*	*	*	*	*	*	*	*	*	*	*	*	*	*	*	*	*	*	*	*	*	*	*	*	*	*	*	*	*
23	Quintana Roo	8	Solidaridad	265	San José	871456	202925	7	62	34	28	2	0	2	60	34	26	56	32	24	44	25	19	44	25	19	41	24	17	4	2	2	12	7	5	6	2	4	0	0	0	3	1	2	9	3	6	18	3
23	Quintana Roo	8	Solidaridad	272	San Mateo	871416	203004	8	20	10	10	2	1	1	18	9	9	18	9	9	14	6	8	13	6	7	13	6	7	0	0	0	4	3	1	4	2	2	1	0	1	0	0	0	2	1	1	6	0
23	Quintana Roo	8	Solidaridad	274	San Miguel	871623	202757	16	1	*	*	*	*	*	*	*	*	*	*	*	*	*	*	*	*	*	*	*	*	*	*	*	*	*	*	*	*	*	*	*	*	*	*	*	*	*	*	*	*
23	Quintana Roo	8	Solidaridad	276	San Miguel	871841	202454	11	4	*	*	*	*	*	*	*	*	*	*	*	*	*	*	*	*	*	*	*	*	*	*	*	*	*	*	*	*	*	*	*	*	*	*	*	*	*	*	*	*
23	Quintana Roo	8	Solidaridad	285	Grand Palladium	871731	202636	10	334	219	115	3	3	0	331	216	115	331	216	115	324	212	112	323	211	112	312	202	110	0	0	0	7	4	3	5	4	1	1	1	0	11	9	2	176	107	69	111	1
23	Quintana Roo	8	Solidaridad	288	Santa Elena	870104	204519	9	1	*	*	*	*	*	*	*	*	*	*	*	*	*	*	*	*	*	*	*	*	*	*	*	*	*	*	*	*	*	*	*	*	*	*	*	*	*	*	*	*
23	Quintana Roo	8	Solidaridad	300	Santa Rosa	871407	203012	8	12	*	*	*	*	*	*	*	*	*	*	*	*	*	*	*	*	*	*	*	*	*	*	*	*	*	*	*	*	*	*	*	*	*	*	*	*	*	*	*	*
23	Quintana Roo	8	Solidaridad	304	La Ceiba	870116	204527	9	2	*	*	*	*	*	*	*	*	*	*	*	*	*	*	*	*	*	*	*	*	*	*	*	*	*	*	*	*	*	*	*	*	*	*	*	*	*	*	*	*
23	Quintana Roo	8	Solidaridad	308	Puerto Aventuras	871403	203042	9	5979	3073	2906	473	216	257	5258	2731	2527	4957	2581	2376	4236	2223	2013	4008	2104	1904	3754	1971	1783	423	207	216	599	301	298	609	311	298	228	119	109	254	133	121	1072	530	542	1764	82
23	Quintana Roo	8	Solidaridad	312	Tazol Chico	871450	202931	7	2	*	*	*	*	*	*	*	*	*	*	*	*	*	*	*	*	*	*	*	*	*	*	*	*	*	*	*	*	*	*	*	*	*	*	*	*	*	*	*	*
23	Quintana Roo	8	Solidaridad	314	Tigre Grande	865713	204659	4	8	*	*	*	*	*	*	*	*	*	*	*	*	*	*	*	*	*	*	*	*	*	*	*	*	*	*	*	*	*	*	*	*	*	*	*	*	*	*	*	*
23	Quintana Roo	8	Solidaridad	331	Uxuxubi	872328	202728	30	15	10	5	1	1	0	14	9	5	13	9	4	10	7	3	10	7	3	10	7	3	2	1	1	2	1	1	0	0	0	0	0	0	0	0	0	5	3	2	3	0
23	Quintana Roo	8	Solidaridad	341	Xcaret	870747	203522	10	4	*	*	*	*	*	*	*	*	*	*	*	*	*	*	*	*	*	*	*	*	*	*	*	*	*	*	*	*	*	*	*	*	*	*	*	*	*	*	*	*
23	Quintana Roo	8	Solidaridad	342	Xcaret	870708	203444	10	3	*	*	*	*	*	*	*	*	*	*	*	*	*	*	*	*	*	*	*	*	*	*	*	*	*	*	*	*	*	*	*	*	*	*	*	*	*	*	*	*
23	Quintana Roo	8	Solidaridad	345	Xpu Ha	871542	202836	8	36	19	17	1	1	0	35	18	17	34	18	16	27	16	11	26	15	11	23	14	9	3	1	2	5	1	4	4	2	2	1	1	0	3	1	2	3	2	1	8	4
23	Quintana Roo	8	Solidaridad	356	Zazil-Ha	865955	204400	10	4	*	*	*	*	*	*	*	*	*	*	*	*	*	*	*	*	*	*	*	*	*	*	*	*	*	*	*	*	*	*	*	*	*	*	*	*	*	*	*	*
23	Quintana Roo	8	Solidaridad	373	Las Velitas	870621	203826	10	5	*	*	*	*	*	*	*	*	*	*	*	*	*	*	*	*	*	*	*	*	*	*	*	*	*	*	*	*	*	*	*	*	*	*	*	*	*	*	*	*
23	Quintana Roo	8	Solidaridad	377	Artesanías Mexicanas	871755	202557	15	2	*	*	*	*	*	*	*	*	*	*	*	*	*	*	*	*	*	*	*	*	*	*	*	*	*	*	*	*	*	*	*	*	*	*	*	*	*	*	*	*
23	Quintana Roo	8	Solidaridad	382	Barceló Maya	871446	202915	7	606	384	222	6	3	3	587	373	214	582	371	211	573	364	209	565	360	205	560	355	205	6	2	4	8	7	1	13	8	5	8	4	4	5	5	0	261	161	100	200	0
23	Quintana Roo	8	Solidaridad	384	Ocean Maya Resort	870056	204156	4	20	*	*	*	*	*	*	*	*	*	*	*	*	*	*	*	*	*	*	*	*	*	*	*	*	*	*	*	*	*	*	*	*	*	*	*	*	*	*	*	*
23	Quintana Roo	8	Solidaridad	389	Cárcel Pública	870830	203942	10	314	*	*	*	*	*	*	*	*	*	*	*	*	*	*	*	*	*	*	*	*	*	*	*	*	*	*	*	*	*	*	*	*	*	*	*	*	*	*	*	*
23	Quintana Roo	8	Solidaridad	402	Cuzel	871524	202859	7	5	*	*	*	*	*	*	*	*	*	*	*	*	*	*	*	*	*	*	*	*	*	*	*	*	*	*	*	*	*	*	*	*	*	*	*	*	*	*	*	*
23	Quintana Roo	8	Solidaridad	407	Don Eduardo	870733	203539	10	2	*	*	*	*	*	*	*	*	*	*	*	*	*	*	*	*	*	*	*	*	*	*	*	*	*	*	*	*	*	*	*	*	*	*	*	*	*	*	*	*
23	Quintana Roo	8	Solidaridad	410	La Estrella del Sur	871046	203250	8	1	*	*	*	*	*	*	*	*	*	*	*	*	*	*	*	*	*	*	*	*	*	*	*	*	*	*	*	*	*	*	*	*	*	*	*	*	*	*	*	*
23	Quintana Roo	8	Solidaridad	416	Guadalupano	870714	203555	10	18	*	*	*	*	*	*	*	*	*	*	*	*	*	*	*	*	*	*	*	*	*	*	*	*	*	*	*	*	*	*	*	*	*	*	*	*	*	*	*	*
23	Quintana Roo	8	Solidaridad	453	Nueva Creación	871442	202941	7	10	4	6	0	0	0	10	4	6	9	4	5	7	2	5	5	2	3	5	2	3	1	0	1	2	2	0	3	1	2	2	0	2	0	0	0	0	0	0	3	0
23	Quintana Roo	8	Solidaridad	460	Paraíso Tucán	871719	202852	15	13	9	4	0	0	0	13	9	4	12	8	4	12	8	4	11	7	4	11	7	4	1	1	0	0	0	0	1	1	0	1	1	0	0	0	0	1	1	0	1	1
23	Quintana Roo	8	Solidaridad	468	Santa Lucía	870300	204619	7	13	*	*	*	*	*	*	*	*	*	*	*	*	*	*	*	*	*	*	*	*	*	*	*	*	*	*	*	*	*	*	*	*	*	*	*	*	*	*	*	*
23	Quintana Roo	8	Solidaridad	478	Los Lachos	870720	203901	10	1	*	*	*	*	*	*	*	*	*	*	*	*	*	*	*	*	*	*	*	*	*	*	*	*	*	*	*	*	*	*	*	*	*	*	*	*	*	*	*	*
23	Quintana Roo	8	Solidaridad	480	San Gonzalo	865904	204422	8	7	*	*	*	*	*	*	*	*	*	*	*	*	*	*	*	*	*	*	*	*	*	*	*	*	*	*	*	*	*	*	*	*	*	*	*	*	*	*	*	*
23	Quintana Roo	8	Solidaridad	481	San Francisco	871522	202901	7	3	*	*	*	*	*	*	*	*	*	*	*	*	*	*	*	*	*	*	*	*	*	*	*	*	*	*	*	*	*	*	*	*	*	*	*	*	*	*	*	*
23	Quintana Roo	8	Solidaridad	483	San Martín	871841	202532	15	41	23	18	1	1	0	40	22	18	36	20	16	31	17	14	29	16	13	28	15	13	4	2	2	5	3	2	7	4	3	2	1	1	1	1	0	3	1	2	12	1
23	Quintana Roo	8	Solidaridad	486	Santa Librada	871030	203159	1	1	*	*	*	*	*	*	*	*	*	*	*	*	*	*	*	*	*	*	*	*	*	*	*	*	*	*	*	*	*	*	*	*	*	*	*	*	*	*	*	*
23	Quintana Roo	8	Solidaridad	495	El Trébol	871313	203045	5	3	*	*	*	*	*	*	*	*	*	*	*	*	*	*	*	*	*	*	*	*	*	*	*	*	*	*	*	*	*	*	*	*	*	*	*	*	*	*	*	*
23	Quintana Roo	8	Solidaridad	496	Tres Ríos	870045	204233	8	2	*	*	*	*	*	*	*	*	*	*	*	*	*	*	*	*	*	*	*	*	*	*	*	*	*	*	*	*	*	*	*	*	*	*	*	*	*	*	*	*
23	Quintana Roo	8	Solidaridad	506	El Vuelo del Águila	870248	204614	8	1	*	*	*	*	*	*	*	*	*	*	*	*	*	*	*	*	*	*	*	*	*	*	*	*	*	*	*	*	*	*	*	*	*	*	*	*	*	*	*	*
23	Quintana Roo	8	Solidaridad	547	Las Orquídeas	871731	202854	15	2	*	*	*	*	*	*	*	*	*	*	*	*	*	*	*	*	*	*	*	*	*	*	*	*	*	*	*	*	*	*	*	*	*	*	*	*	*	*	*	*
23	Quintana Roo	8	Solidaridad	549	Tapia	871513	202919	7	1	*	*	*	*	*	*	*	*	*	*	*	*	*	*	*	*	*	*	*	*	*	*	*	*	*	*	*	*	*	*	*	*	*	*	*	*	*	*	*	*
23	Quintana Roo	8	Solidaridad	551	El Pedregal	865934	204426	10	5	*	*	*	*	*	*	*	*	*	*	*	*	*	*	*	*	*	*	*	*	*	*	*	*	*	*	*	*	*	*	*	*	*	*	*	*	*	*	*	*
23	Quintana Roo	8	Solidaridad	583	Las Palmas	870716	203858	10	2	*	*	*	*	*	*	*	*	*	*	*	*	*	*	*	*	*	*	*	*	*	*	*	*	*	*	*	*	*	*	*	*	*	*	*	*	*	*	*	*
23	Quintana Roo	8	Solidaridad	596	Marina Maroma	865840	204325	2	4	*	*	*	*	*	*	*	*	*	*	*	*	*	*	*	*	*	*	*	*	*	*	*	*	*	*	*	*	*	*	*	*	*	*	*	*	*	*	*	*
23	Quintana Roo	8	Solidaridad	606	Rancho Palomar	870632	203629	10	3	*	*	*	*	*	*	*	*	*	*	*	*	*	*	*	*	*	*	*	*	*	*	*	*	*	*	*	*	*	*	*	*	*	*	*	*	*	*	*	*
23	Quintana Roo	8	Solidaridad	608	Las Chabelitas	870715	203859	10	1	*	*	*	*	*	*	*	*	*	*	*	*	*	*	*	*	*	*	*	*	*	*	*	*	*	*	*	*	*	*	*	*	*	*	*	*	*	*	*	*
23	Quintana Roo	8	Solidaridad	611	San Román	870727	203904	10	3	*	*	*	*	*	*	*	*	*	*	*	*	*	*	*	*	*	*	*	*	*	*	*	*	*	*	*	*	*	*	*	*	*	*	*	*	*	*	*	*
23	Quintana Roo	8	Solidaridad	613	Secret Capri	870057	204147	2	75	*	*	*	*	*	*	*	*	*	*	*	*	*	*	*	*	*	*	*	*	*	*	*	*	*	*	*	*	*	*	*	*	*	*	*	*	*	*	*	*
23	Quintana Roo	8	Solidaridad	623	El Gallo Viejo	870701	203850	10	3	*	*	*	*	*	*	*	*	*	*	*	*	*	*	*	*	*	*	*	*	*	*	*	*	*	*	*	*	*	*	*	*	*	*	*	*	*	*	*	*
23	Quintana Roo	8	Solidaridad	624	Los Marios	870656	203847	10	3	*	*	*	*	*	*	*	*	*	*	*	*	*	*	*	*	*	*	*	*	*	*	*	*	*	*	*	*	*	*	*	*	*	*	*	*	*	*	*	*
23	Quintana Roo	8	Solidaridad	626	El Sol	870812	203932	10	3	*	*	*	*	*	*	*	*	*	*	*	*	*	*	*	*	*	*	*	*	*	*	*	*	*	*	*	*	*	*	*	*	*	*	*	*	*	*	*	*
23	Quintana Roo	8	Solidaridad	627	Las Golondrinas	870759	203925	10	4	*	*	*	*	*	*	*	*	*	*	*	*	*	*	*	*	*	*	*	*	*	*	*	*	*	*	*	*	*	*	*	*	*	*	*	*	*	*	*	*
23	Quintana Roo	8	Solidaridad	629	Baltazar Aguilar	870802	203929	10	7	*	*	*	*	*	*	*	*	*	*	*	*	*	*	*	*	*	*	*	*	*	*	*	*	*	*	*	*	*	*	*	*	*	*	*	*	*	*	*	*
23	Quintana Roo	8	Solidaridad	631	Hacienda del Caribe	870902	204005	10	2	*	*	*	*	*	*	*	*	*	*	*	*	*	*	*	*	*	*	*	*	*	*	*	*	*	*	*	*	*	*	*	*	*	*	*	*	*	*	*	*
23	Quintana Roo	8	Solidaridad	632	El Pedregal	870920	204012	10	3	*	*	*	*	*	*	*	*	*	*	*	*	*	*	*	*	*	*	*	*	*	*	*	*	*	*	*	*	*	*	*	*	*	*	*	*	*	*	*	*
23	Quintana Roo	8	Solidaridad	634	Carlos Quiam	870950	204040	10	3	*	*	*	*	*	*	*	*	*	*	*	*	*	*	*	*	*	*	*	*	*	*	*	*	*	*	*	*	*	*	*	*	*	*	*	*	*	*	*	*
23	Quintana Roo	8	Solidaridad	636	San Miguel	871031	204056	11	2	*	*	*	*	*	*	*	*	*	*	*	*	*	*	*	*	*	*	*	*	*	*	*	*	*	*	*	*	*	*	*	*	*	*	*	*	*	*	*	*
23	Quintana Roo	8	Solidaridad	637	Yumbalam	871037	204058	11	2	*	*	*	*	*	*	*	*	*	*	*	*	*	*	*	*	*	*	*	*	*	*	*	*	*	*	*	*	*	*	*	*	*	*	*	*	*	*	*	*
23	Quintana Roo	8	Solidaridad	638	El Pueblito	871053	204109	12	2	*	*	*	*	*	*	*	*	*	*	*	*	*	*	*	*	*	*	*	*	*	*	*	*	*	*	*	*	*	*	*	*	*	*	*	*	*	*	*	*
23	Quintana Roo	8	Solidaridad	639	Las Palmas	870050	204518	9	7	*	*	*	*	*	*	*	*	*	*	*	*	*	*	*	*	*	*	*	*	*	*	*	*	*	*	*	*	*	*	*	*	*	*	*	*	*	*	*	*
23	Quintana Roo	8	Solidaridad	640	Vida y Esperanza	870214	204551	9	87	54	33	5	3	2	82	51	31	79	48	31	57	34	23	56	34	22	53	33	20	9	8	1	16	9	7	10	5	5	1	0	1	3	1	2	1	1	0	13	17
23	Quintana Roo	8	Solidaridad	641	Dorado Royale	865619	204709	1	31	11	20	0	0	0	25	8	17	25	8	17	25	8	17	25	8	17	25	8	17	0	0	0	0	0	0	0	0	0	0	0	0	0	0	0	7	0	7	17	0
23	Quintana Roo	8	Solidaridad	642	Santa Teresita	871648	202729	15	15	7	8	0	0	0	15	7	8	14	7	7	13	6	7	13	6	7	13	6	7	2	1	1	0	0	0	0	0	0	0	0	0	0	0	0	0	0	0	4	1
23	Quintana Roo	8	Solidaridad	643	Ninguno [Caseta de Bomba de Agua]	871437	203052	10	2	*	*	*	*	*	*	*	*	*	*	*	*	*	*	*	*	*	*	*	*	*	*	*	*	*	*	*	*	*	*	*	*	*	*	*	*	*	*	*	*
23	Quintana Roo	8	Solidaridad	677	La Mocha	871037	204059	11	1	*	*	*	*	*	*	*	*	*	*	*	*	*	*	*	*	*	*	*	*	*	*	*	*	*	*	*	*	*	*	*	*	*	*	*	*	*	*	*	*
23	Quintana Roo	8	Solidaridad	680	Un Lugar con Amor	870132	204605	9	6	*	*	*	*	*	*	*	*	*	*	*	*	*	*	*	*	*	*	*	*	*	*	*	*	*	*	*	*	*	*	*	*	*	*	*	*	*	*	*	*
23	Quintana Roo	8	Solidaridad	684	La Búsqueda	870121	204630	9	6	*	*	*	*	*	*	*	*	*	*	*	*	*	*	*	*	*	*	*	*	*	*	*	*	*	*	*	*	*	*	*	*	*	*	*	*	*	*	*	*
23	Quintana Roo	8	Solidaridad	685	Jacinto Aguilar Quiam	871104	204115	12	5	*	*	*	*	*	*	*	*	*	*	*	*	*	*	*	*	*	*	*	*	*	*	*	*	*	*	*	*	*	*	*	*	*	*	*	*	*	*	*	*
23	Quintana Roo	8	Solidaridad	691	Monte de Sión	870114	204647	9	1	*	*	*	*	*	*	*	*	*	*	*	*	*	*	*	*	*	*	*	*	*	*	*	*	*	*	*	*	*	*	*	*	*	*	*	*	*	*	*	*
23	Quintana Roo	8	Solidaridad	699	La Santísima	870127	204618	9	11	*	*	*	*	*	*	*	*	*	*	*	*	*	*	*	*	*	*	*	*	*	*	*	*	*	*	*	*	*	*	*	*	*	*	*	*	*	*	*	*
23	Quintana Roo	8	Solidaridad	702	La Ceiba	874237	203542	20	14	8	6	0	0	0	14	8	6	14	8	6	10	6	4	9	5	4	6	4	2	1	1	0	3	1	2	2	2	0	1	1	0	3	1	2	1	1	0	4	1
23	Quintana Roo	8	Solidaridad	706	Chun Yaxché	873927	203630	20	10	7	3	0	0	0	10	7	3	9	6	3	7	6	1	7	6	1	7	6	1	1	1	0	2	0	2	1	0	1	0	0	0	0	0	0	0	0	0	1	2
23	Quintana Roo	8	Solidaridad	709	Felipe Carrillo Puerto	875205	202946	23	176	95	81	8	5	3	166	89	77	155	83	72	126	65	61	109	60	49	87	47	40	12	6	6	28	18	10	35	18	17	17	5	12	22	13	9	32	16	16	43	6
23	Quintana Roo	8	Solidaridad	710	Guadalupe	873945	203542	20	15	9	6	0	0	0	15	9	6	15	9	6	12	7	5	10	6	4	7	3	4	0	0	0	3	2	1	5	3	2	2	1	1	3	3	0	1	0	1	3	2
23	Quintana Roo	8	Solidaridad	711	Hidalgo y Cortez	874008	203548	20	128	60	68	11	4	7	117	56	61	110	54	56	84	40	44	77	38	39	67	33	34	9	3	6	24	13	11	24	10	14	7	2	5	10	5	5	25	12	13	28	4
23	Quintana Roo	8	Solidaridad	716	Punta Laguna	873753	203845	20	138	75	63	14	7	7	124	68	56	111	61	50	78	42	36	69	37	32	63	32	31	22	13	9	24	13	11	24	14	10	9	5	4	6	5	1	14	6	8	25	7
23	Quintana Roo	8	Solidaridad	718	San Felipe	874055	203444	11	5	*	*	*	*	*	*	*	*	*	*	*	*	*	*	*	*	*	*	*	*	*	*	*	*	*	*	*	*	*	*	*	*	*	*	*	*	*	*	*	*
23	Quintana Roo	8	Solidaridad	720	San Pedro	875001	202728	20	98	54	44	10	6	4	88	48	40	83	44	39	73	38	35	66	35	31	58	29	29	7	5	2	8	5	3	13	6	7	7	3	4	8	6	2	21	9	12	25	2
23	Quintana Roo	8	Solidaridad	722	Santa Clara	873823	203651	20	2	*	*	*	*	*	*	*	*	*	*	*	*	*	*	*	*	*	*	*	*	*	*	*	*	*	*	*	*	*	*	*	*	*	*	*	*	*	*	*	*
23	Quintana Roo	8	Solidaridad	735	Los Álamos	870535	204725	8	6	5	1	0	0	0	6	5	1	6	5	1	6	5	1	6	5	1	6	5	1	0	0	0	0	0	0	0	0	0	0	0	0	0	0	0	4	3	1	1	1
23	Quintana Roo	8	Solidaridad	740	Buenaventura	870254	204610	8	4	*	*	*	*	*	*	*	*	*	*	*	*	*	*	*	*	*	*	*	*	*	*	*	*	*	*	*	*	*	*	*	*	*	*	*	*	*	*	*	*
23	Quintana Roo	8	Solidaridad	762	Los Girasoles	870414	204647	5	3	*	*	*	*	*	*	*	*	*	*	*	*	*	*	*	*	*	*	*	*	*	*	*	*	*	*	*	*	*	*	*	*	*	*	*	*	*	*	*	*
23	Quintana Roo	8	Solidaridad	764	La Güera	870134	204601	9	3	*	*	*	*	*	*	*	*	*	*	*	*	*	*	*	*	*	*	*	*	*	*	*	*	*	*	*	*	*	*	*	*	*	*	*	*	*	*	*	*
23	Quintana Roo	8	Solidaridad	784	Santa Cecilia	870137	204726	9	27	23	4	2	2	0	25	21	4	25	21	4	25	21	4	25	21	4	24	20	4	0	0	0	0	0	0	0	0	0	0	0	0	1	1	0	7	6	1	3	3
23	Quintana Roo	8	Solidaridad	787	Parcela Isabel	870906	204006	10	2	*	*	*	*	*	*	*	*	*	*	*	*	*	*	*	*	*	*	*	*	*	*	*	*	*	*	*	*	*	*	*	*	*	*	*	*	*	*	*	*
23	Quintana Roo	8	Solidaridad	793	Rancho Amor	871716	202729	15	1	*	*	*	*	*	*	*	*	*	*	*	*	*	*	*	*	*	*	*	*	*	*	*	*	*	*	*	*	*	*	*	*	*	*	*	*	*	*	*	*
23	Quintana Roo	8	Solidaridad	799	Las Gemelas	871051	204106	11	6	*	*	*	*	*	*	*	*	*	*	*	*	*	*	*	*	*	*	*	*	*	*	*	*	*	*	*	*	*	*	*	*	*	*	*	*	*	*	*	*
23	Quintana Roo	8	Solidaridad	801	San Enrique	871730	202739	15	1	*	*	*	*	*	*	*	*	*	*	*	*	*	*	*	*	*	*	*	*	*	*	*	*	*	*	*	*	*	*	*	*	*	*	*	*	*	*	*	*
23	Quintana Roo	8	Solidaridad	803	San José	871720	202733	15	5	*	*	*	*	*	*	*	*	*	*	*	*	*	*	*	*	*	*	*	*	*	*	*	*	*	*	*	*	*	*	*	*	*	*	*	*	*	*	*	*
23	Quintana Roo	8	Solidaridad	805	Santa Cruz	870948	204029	10	7	*	*	*	*	*	*	*	*	*	*	*	*	*	*	*	*	*	*	*	*	*	*	*	*	*	*	*	*	*	*	*	*	*	*	*	*	*	*	*	*
23	Quintana Roo	8	Solidaridad	809	Los Tres Alazanes	870134	204617	9	2	*	*	*	*	*	*	*	*	*	*	*	*	*	*	*	*	*	*	*	*	*	*	*	*	*	*	*	*	*	*	*	*	*	*	*	*	*	*	*	*
23	Quintana Roo	8	Solidaridad	818	Playa Paraíso	865729	204536	2	8	3	5	0	0	0	7	3	4	7	3	4	7	3	4	7	3	4	6	2	4	0	0	0	0	0	0	0	0	0	0	0	0	1	1	0	2	1	1	2	2
23	Quintana Roo	8	Solidaridad	820	El Aventurero	871034	204057	11	1	*	*	*	*	*	*	*	*	*	*	*	*	*	*	*	*	*	*	*	*	*	*	*	*	*	*	*	*	*	*	*	*	*	*	*	*	*	*	*	*
23	Quintana Roo	8	Solidaridad	823	Campamento Cristiano	870140	204624	9	1	*	*	*	*	*	*	*	*	*	*	*	*	*	*	*	*	*	*	*	*	*	*	*	*	*	*	*	*	*	*	*	*	*	*	*	*	*	*	*	*
23	Quintana Roo	8	Solidaridad	824	Los Campos	870805	203801	10	5	*	*	*	*	*	*	*	*	*	*	*	*	*	*	*	*	*	*	*	*	*	*	*	*	*	*	*	*	*	*	*	*	*	*	*	*	*	*	*	*
23	Quintana Roo	8	Solidaridad	825	Los Cayuyas	870912	204006	10	9	6	3	1	1	0	8	5	3	8	5	3	6	3	3	5	3	2	5	3	2	0	0	0	2	2	0	2	1	1	1	0	1	0	0	0	2	1	1	2	0
23	Quintana Roo	8	Solidaridad	826	Los Cedros	871429	204200	10	4	*	*	*	*	*	*	*	*	*	*	*	*	*	*	*	*	*	*	*	*	*	*	*	*	*	*	*	*	*	*	*	*	*	*	*	*	*	*	*	*
23	Quintana Roo	8	Solidaridad	828	El Engaño	870913	204022	10	10	*	*	*	*	*	*	*	*	*	*	*	*	*	*	*	*	*	*	*	*	*	*	*	*	*	*	*	*	*	*	*	*	*	*	*	*	*	*	*	*
23	Quintana Roo	8	Solidaridad	829	Enramada	870546	204404	9	2	*	*	*	*	*	*	*	*	*	*	*	*	*	*	*	*	*	*	*	*	*	*	*	*	*	*	*	*	*	*	*	*	*	*	*	*	*	*	*	*
23	Quintana Roo	8	Solidaridad	830	Felicidad	871553	204153	10	5	*	*	*	*	*	*	*	*	*	*	*	*	*	*	*	*	*	*	*	*	*	*	*	*	*	*	*	*	*	*	*	*	*	*	*	*	*	*	*	*
23	Quintana Roo	8	Solidaridad	831	Filiberto Aguilar	870856	203958	10	3	*	*	*	*	*	*	*	*	*	*	*	*	*	*	*	*	*	*	*	*	*	*	*	*	*	*	*	*	*	*	*	*	*	*	*	*	*	*	*	*
23	Quintana Roo	8	Solidaridad	832	Finca Yohana	870809	203930	10	1	*	*	*	*	*	*	*	*	*	*	*	*	*	*	*	*	*	*	*	*	*	*	*	*	*	*	*	*	*	*	*	*	*	*	*	*	*	*	*	*
23	Quintana Roo	8	Solidaridad	833	Finca Yorogana	870807	203928	10	5	*	*	*	*	*	*	*	*	*	*	*	*	*	*	*	*	*	*	*	*	*	*	*	*	*	*	*	*	*	*	*	*	*	*	*	*	*	*	*	*
23	Quintana Roo	8	Solidaridad	834	La Gloria	870139	204620	9	3	*	*	*	*	*	*	*	*	*	*	*	*	*	*	*	*	*	*	*	*	*	*	*	*	*	*	*	*	*	*	*	*	*	*	*	*	*	*	*	*
23	Quintana Roo	8	Solidaridad	835	Grand Sirenis	871753	202531	9	125	91	34	7	7	0	118	84	34	117	83	34	113	82	31	113	82	31	112	81	31	2	1	1	3	1	2	1	0	1	0	0	0	1	1	0	51	36	15	30	0
23	Quintana Roo	8	Solidaridad	837	El Hidalguense	870604	204419	8	1	*	*	*	*	*	*	*	*	*	*	*	*	*	*	*	*	*	*	*	*	*	*	*	*	*	*	*	*	*	*	*	*	*	*	*	*	*	*	*	*
23	Quintana Roo	8	Solidaridad	838	Ismael	870840	204004	10	2	*	*	*	*	*	*	*	*	*	*	*	*	*	*	*	*	*	*	*	*	*	*	*	*	*	*	*	*	*	*	*	*	*	*	*	*	*	*	*	*
23	Quintana Roo	8	Solidaridad	839	Jacinta Pat Pul	870817	203946	10	2	*	*	*	*	*	*	*	*	*	*	*	*	*	*	*	*	*	*	*	*	*	*	*	*	*	*	*	*	*	*	*	*	*	*	*	*	*	*	*	*
23	Quintana Roo	8	Solidaridad	844	Luis Aguilar Dzib	871027	204052	11	3	*	*	*	*	*	*	*	*	*	*	*	*	*	*	*	*	*	*	*	*	*	*	*	*	*	*	*	*	*	*	*	*	*	*	*	*	*	*	*	*
23	Quintana Roo	8	Solidaridad	848	Las Marillas	870938	204024	10	4	*	*	*	*	*	*	*	*	*	*	*	*	*	*	*	*	*	*	*	*	*	*	*	*	*	*	*	*	*	*	*	*	*	*	*	*	*	*	*	*
23	Quintana Roo	8	Solidaridad	850	La Morena	870140	204619	9	2	*	*	*	*	*	*	*	*	*	*	*	*	*	*	*	*	*	*	*	*	*	*	*	*	*	*	*	*	*	*	*	*	*	*	*	*	*	*	*	*
23	Quintana Roo	8	Solidaridad	852	El Palomar	870924	204014	10	6	*	*	*	*	*	*	*	*	*	*	*	*	*	*	*	*	*	*	*	*	*	*	*	*	*	*	*	*	*	*	*	*	*	*	*	*	*	*	*	*
23	Quintana Roo	8	Solidaridad	853	Paula Dzib Quiam	870909	204007	10	8	*	*	*	*	*	*	*	*	*	*	*	*	*	*	*	*	*	*	*	*	*	*	*	*	*	*	*	*	*	*	*	*	*	*	*	*	*	*	*	*
23	Quintana Roo	8	Solidaridad	855	La Plumita	870939	204027	10	5	*	*	*	*	*	*	*	*	*	*	*	*	*	*	*	*	*	*	*	*	*	*	*	*	*	*	*	*	*	*	*	*	*	*	*	*	*	*	*	*
23	Quintana Roo	8	Solidaridad	856	El Porvenir	870308	204202	10	4	*	*	*	*	*	*	*	*	*	*	*	*	*	*	*	*	*	*	*	*	*	*	*	*	*	*	*	*	*	*	*	*	*	*	*	*	*	*	*	*
23	Quintana Roo	8	Solidaridad	857	Rancho Chico	870915	204011	10	6	*	*	*	*	*	*	*	*	*	*	*	*	*	*	*	*	*	*	*	*	*	*	*	*	*	*	*	*	*	*	*	*	*	*	*	*	*	*	*	*
23	Quintana Roo	8	Solidaridad	858	Rancho Grande	870605	204422	8	5	*	*	*	*	*	*	*	*	*	*	*	*	*	*	*	*	*	*	*	*	*	*	*	*	*	*	*	*	*	*	*	*	*	*	*	*	*	*	*	*
23	Quintana Roo	8	Solidaridad	859	Rancho Guadalupe	865922	204432	10	5	*	*	*	*	*	*	*	*	*	*	*	*	*	*	*	*	*	*	*	*	*	*	*	*	*	*	*	*	*	*	*	*	*	*	*	*	*	*	*	*
23	Quintana Roo	8	Solidaridad	860	San Carlos	871707	204307	17	40	22	18	5	2	3	35	20	15	34	20	14	32	19	13	32	19	13	29	18	11	2	1	1	1	0	1	0	0	0	0	0	0	3	1	2	5	2	3	10	7
23	Quintana Roo	8	Solidaridad	862	San Juan Bautista	870119	204600	9	2	*	*	*	*	*	*	*	*	*	*	*	*	*	*	*	*	*	*	*	*	*	*	*	*	*	*	*	*	*	*	*	*	*	*	*	*	*	*	*	*
23	Quintana Roo	8	Solidaridad	864	San Yuyul	870722	203900	10	1	*	*	*	*	*	*	*	*	*	*	*	*	*	*	*	*	*	*	*	*	*	*	*	*	*	*	*	*	*	*	*	*	*	*	*	*	*	*	*	*
23	Quintana Roo	8	Solidaridad	867	Tres Hermanos	870554	204412	9	6	*	*	*	*	*	*	*	*	*	*	*	*	*	*	*	*	*	*	*	*	*	*	*	*	*	*	*	*	*	*	*	*	*	*	*	*	*	*	*	*
23	Quintana Roo	8	Solidaridad	869	Yaxluum	870930	204018	10	1	*	*	*	*	*	*	*	*	*	*	*	*	*	*	*	*	*	*	*	*	*	*	*	*	*	*	*	*	*	*	*	*	*	*	*	*	*	*	*	*
23	Quintana Roo	8	Solidaridad	9998	Localidades de una vivienda				722	583	139	22	12	10	700	571	129	684	564	120	654	549	105	646	544	102	634	538	96	22	10	12	24	12	12	24	15	9	8	5	3	12	6	6	213	180	33	89	38
23	Quintana Roo	8	Solidaridad	9999	Localidades de dos viviendas				98	66	32	9	6	3	89	60	29	84	59	25	78	57	21	76	57	19	71	54	17	6	1	5	5	2	3	6	2	4	2	0	2	5	3	2	17	12	5	15	7
23	Quintana Roo	9	Tulum	0	Total del Municipio				28263	14714	13549	2016	1050	966	25792	13434	12358	24440	12731	11709	20279	10588	9691	18689	9804	8885	17040	8936	8104	1941	1015	926	3572	1831	1741	3996	2038	1958	1590	784	806	1649	868	781	4488	2333	2155	7817	965
23	Quintana Roo	9	Tulum	1	Tulum	872757	201243	10	18233	9510	8723	1305	696	609	16608	8655	7953	15743	8201	7542	13156	6879	6277	12211	6423	5788	11228	5914	5314	1260	668	592	2192	1108	1084	2408	1207	1201	945	456	489	983	509	474	3046	1615	1431	5195	470
23	Quintana Roo	9	Tulum	2	El Abadejo	872737	200838	1	2	*	*	*	*	*	*	*	*	*	*	*	*	*	*	*	*	*	*	*	*	*	*	*	*	*	*	*	*	*	*	*	*	*	*	*	*	*	*	*	*
23	Quintana Roo	9	Tulum	3	Águila Azteca	872802	201502	11	2	*	*	*	*	*	*	*	*	*	*	*	*	*	*	*	*	*	*	*	*	*	*	*	*	*	*	*	*	*	*	*	*	*	*	*	*	*	*	*	*
23	Quintana Roo	9	Tulum	5	Akumal	871916	202400	11	1310	708	602	82	41	41	1205	654	551	1145	619	526	978	526	452	918	499	419	837	454	383	75	45	30	152	83	69	157	79	78	60	27	33	81	45	36	209	113	96	369	40
23	Quintana Roo	9	Tulum	6	Akumal Beach Resorts	871859	202340	3	15	10	5	0	0	0	15	10	5	15	10	5	15	10	5	15	10	5	15	10	5	0	0	0	0	0	0	0	0	0	0	0	0	0	0	0	4	2	2	5	0
23	Quintana Roo	9	Tulum	7	Akumal Sur	871930	202254	2	37	17	20	2	2	0	35	15	20	33	14	19	27	11	16	25	11	14	24	11	13	3	2	1	5	2	3	6	1	5	2	0	2	1	0	1	3	1	2	11	3
23	Quintana Roo	9	Tulum	11	Los Arrecifes	872716	200934	0	1	*	*	*	*	*	*	*	*	*	*	*	*	*	*	*	*	*	*	*	*	*	*	*	*	*	*	*	*	*	*	*	*	*	*	*	*	*	*	*	*
23	Quintana Roo	9	Tulum	12	La Ley del Monte	872728	201341	10	3	*	*	*	*	*	*	*	*	*	*	*	*	*	*	*	*	*	*	*	*	*	*	*	*	*	*	*	*	*	*	*	*	*	*	*	*	*	*	*	*
23	Quintana Roo	9	Tulum	15	Ave Fénix	873628	202253	19	4	*	*	*	*	*	*	*	*	*	*	*	*	*	*	*	*	*	*	*	*	*	*	*	*	*	*	*	*	*	*	*	*	*	*	*	*	*	*	*	*
23	Quintana Roo	9	Tulum	16	Aventuras Akumal	871943	202221	2	17	10	7	1	1	0	16	9	7	16	9	7	15	9	6	14	8	6	13	7	6	0	0	0	1	0	1	1	1	0	1	1	0	1	1	0	1	0	1	4	0
23	Quintana Roo	9	Tulum	18	Gran Bahía Príncipe	871958	202212	4	68	32	36	7	2	5	61	30	31	57	29	28	51	26	25	50	25	25	49	24	25	5	1	4	5	3	2	3	3	0	1	1	0	1	1	0	4	3	1	24	0
23	Quintana Roo	9	Tulum	21	Balam Canché	872337	201657	10	5	*	*	*	*	*	*	*	*	*	*	*	*	*	*	*	*	*	*	*	*	*	*	*	*	*	*	*	*	*	*	*	*	*	*	*	*	*	*	*	*
23	Quintana Roo	9	Tulum	24	Shamicala Petit	872725	200913	1	1	*	*	*	*	*	*	*	*	*	*	*	*	*	*	*	*	*	*	*	*	*	*	*	*	*	*	*	*	*	*	*	*	*	*	*	*	*	*	*	*
23	Quintana Roo	9	Tulum	27	Boca Paila	872840	200154	0	9	6	3	2	1	1	7	5	2	7	5	2	7	5	2	7	5	2	7	5	2	0	0	0	0	0	0	0	0	0	0	0	0	0	0	0	1	1	0	2	0
23	Quintana Roo	9	Tulum	28	El Retiro	872700	195548	0	1	*	*	*	*	*	*	*	*	*	*	*	*	*	*	*	*	*	*	*	*	*	*	*	*	*	*	*	*	*	*	*	*	*	*	*	*	*	*	*	*
23	Quintana Roo	9	Tulum	30	Las Cabañas	873623	202256	19	4	*	*	*	*	*	*	*	*	*	*	*	*	*	*	*	*	*	*	*	*	*	*	*	*	*	*	*	*	*	*	*	*	*	*	*	*	*	*	*	*
23	Quintana Roo	9	Tulum	32	Cabañas Tulum	872722	200925	2	2	*	*	*	*	*	*	*	*	*	*	*	*	*	*	*	*	*	*	*	*	*	*	*	*	*	*	*	*	*	*	*	*	*	*	*	*	*	*	*	*
23	Quintana Roo	9	Tulum	33	Caleta Tankah	872502	201359	5	1	*	*	*	*	*	*	*	*	*	*	*	*	*	*	*	*	*	*	*	*	*	*	*	*	*	*	*	*	*	*	*	*	*	*	*	*	*	*	*	*
23	Quintana Roo	9	Tulum	34	SCT [Campamento]	872642	201258	10	1	*	*	*	*	*	*	*	*	*	*	*	*	*	*	*	*	*	*	*	*	*	*	*	*	*	*	*	*	*	*	*	*	*	*	*	*	*	*	*	*
23	Quintana Roo	9	Tulum	36	Ak'iin	872728	200905	1	2	*	*	*	*	*	*	*	*	*	*	*	*	*	*	*	*	*	*	*	*	*	*	*	*	*	*	*	*	*	*	*	*	*	*	*	*	*	*	*	*
23	Quintana Roo	9	Tulum	38	Ixchel	872749	200758	0	2	*	*	*	*	*	*	*	*	*	*	*	*	*	*	*	*	*	*	*	*	*	*	*	*	*	*	*	*	*	*	*	*	*	*	*	*	*	*	*	*
23	Quintana Roo	9	Tulum	39	Casa del Sol	872838	194825	2	4	*	*	*	*	*	*	*	*	*	*	*	*	*	*	*	*	*	*	*	*	*	*	*	*	*	*	*	*	*	*	*	*	*	*	*	*	*	*	*	*
23	Quintana Roo	9	Tulum	44	Cayetano Nieto Colín	872737	201406	10	2	*	*	*	*	*	*	*	*	*	*	*	*	*	*	*	*	*	*	*	*	*	*	*	*	*	*	*	*	*	*	*	*	*	*	*	*	*	*	*	*
23	Quintana Roo	9	Tulum	47	Las Chachalacas	872344	202157	20	1	*	*	*	*	*	*	*	*	*	*	*	*	*	*	*	*	*	*	*	*	*	*	*	*	*	*	*	*	*	*	*	*	*	*	*	*	*	*	*	*
23	Quintana Roo	9	Tulum	51	Chanchén Palmar	875828	201723	20	469	219	250	37	9	28	432	210	222	403	193	210	298	146	152	268	135	133	240	117	123	43	23	20	91	41	50	98	43	55	30	11	19	28	18	10	67	32	35	108	26
23	Quintana Roo	9	Tulum	52	Chanchen Primero	875804	202402	30	875	444	431	76	43	33	799	401	398	755	380	375	601	299	302	541	261	280	465	222	243	68	33	35	130	69	61	146	82	64	60	38	22	76	39	37	131	56	75	233	49
23	Quintana Roo	9	Tulum	53	Chan Chemuyil	872115	202030	10	57	28	29	5	3	2	52	25	27	50	25	25	44	24	20	43	24	19	40	22	18	3	0	3	5	1	4	2	0	2	1	0	1	3	2	1	4	2	2	16	1
23	Quintana Roo	9	Tulum	55	Ciudad Chemuyil	872111	202055	10	1377	729	648	76	36	40	1268	677	591	1212	650	562	1032	559	473	954	522	432	865	469	396	80	42	38	156	76	80	187	93	94	78	37	41	89	53	36	200	109	91	386	39
23	Quintana Roo	9	Tulum	57	Cobá	874410	202941	10	1278	668	610	82	48	34	1180	610	570	1118	579	539	921	457	464	815	403	412	724	352	372	80	44	36	179	109	70	236	137	99	106	54	52	91	51	40	199	92	107	350	62
23	Quintana Roo	9	Tulum	63	Playa Manatí	872823	194736	1	3	*	*	*	*	*	*	*	*	*	*	*	*	*	*	*	*	*	*	*	*	*	*	*	*	*	*	*	*	*	*	*	*	*	*	*	*	*	*	*	*
23	Quintana Roo	9	Tulum	67	Crucero de las Ruinas de Tulum	872612	201305	10	6	*	*	*	*	*	*	*	*	*	*	*	*	*	*	*	*	*	*	*	*	*	*	*	*	*	*	*	*	*	*	*	*	*	*	*	*	*	*	*	*
23	Quintana Roo	9	Tulum	68	Bahía Xamach	872714	195605	0	3	*	*	*	*	*	*	*	*	*	*	*	*	*	*	*	*	*	*	*	*	*	*	*	*	*	*	*	*	*	*	*	*	*	*	*	*	*	*	*	*
23	Quintana Roo	9	Tulum	71	Doña Leonor	873020	201727	20	13	6	7	1	0	1	12	6	6	11	5	6	9	5	4	7	4	3	6	3	3	1	1	0	2	0	2	3	1	2	2	1	1	1	1	0	0	0	0	2	3
23	Quintana Roo	9	Tulum	72	Dos Ceibas	872744	200814	1	1	*	*	*	*	*	*	*	*	*	*	*	*	*	*	*	*	*	*	*	*	*	*	*	*	*	*	*	*	*	*	*	*	*	*	*	*	*	*	*	*
23	Quintana Roo	9	Tulum	73	Las Dos Hermanas	873008	201716	20	3	*	*	*	*	*	*	*	*	*	*	*	*	*	*	*	*	*	*	*	*	*	*	*	*	*	*	*	*	*	*	*	*	*	*	*	*	*	*	*	*
23	Quintana Roo	9	Tulum	74	Dos Ojos	872331	201926	18	5	*	*	*	*	*	*	*	*	*	*	*	*	*	*	*	*	*	*	*	*	*	*	*	*	*	*	*	*	*	*	*	*	*	*	*	*	*	*	*	*
23	Quintana Roo	9	Tulum	76	Dos Palmas	872301	201925	16	12	5	7	0	0	0	12	5	7	12	5	7	7	3	4	7	3	4	7	3	4	1	0	1	4	2	2	4	2	2	0	0	0	0	0	0	2	0	2	4	1
23	Quintana Roo	9	Tulum	80	Ek Che	875845	202221	20	11	*	*	*	*	*	*	*	*	*	*	*	*	*	*	*	*	*	*	*	*	*	*	*	*	*	*	*	*	*	*	*	*	*	*	*	*	*	*	*	*
23	Quintana Roo	9	Tulum	83	Esmeralda K	872726	200908	1	5	*	*	*	*	*	*	*	*	*	*	*	*	*	*	*	*	*	*	*	*	*	*	*	*	*	*	*	*	*	*	*	*	*	*	*	*	*	*	*	*
23	Quintana Roo	9	Tulum	85	La Esperanza	872130	201957	8	2	*	*	*	*	*	*	*	*	*	*	*	*	*	*	*	*	*	*	*	*	*	*	*	*	*	*	*	*	*	*	*	*	*	*	*	*	*	*	*	*
23	Quintana Roo	9	Tulum	92	Francisco Uh May	873525	202153	20	655	329	326	48	23	25	592	299	293	547	276	271	412	206	206	367	183	184	325	162	163	60	30	30	120	63	57	120	62	58	45	23	22	42	21	21	89	40	49	162	24
23	Quintana Roo	9	Tulum	100	Hondzonot	875823	202204	20	368	193	175	19	13	6	348	180	168	330	173	157	262	134	128	229	115	114	207	107	100	28	12	16	58	34	24	75	46	29	33	19	14	22	8	14	59	27	32	93	32
23	Quintana Roo	9	Tulum	101	Houston	872829	200531	1	7	*	*	*	*	*	*	*	*	*	*	*	*	*	*	*	*	*	*	*	*	*	*	*	*	*	*	*	*	*	*	*	*	*	*	*	*	*	*	*	*
23	Quintana Roo	9	Tulum	105	El Jaguar	872524	201401	10	4	*	*	*	*	*	*	*	*	*	*	*	*	*	*	*	*	*	*	*	*	*	*	*	*	*	*	*	*	*	*	*	*	*	*	*	*	*	*	*	*
23	Quintana Roo	9	Tulum	106	Javier Rojo Gómez (Punta Allen)	872835	194759	2	469	243	226	31	15	16	413	215	198	390	205	185	331	176	155	316	168	148	294	159	135	29	11	18	53	28	25	42	22	20	15	8	7	22	9	13	68	32	36	122	22
23	Quintana Roo	9	Tulum	107	Jorge Portilla Manica	872741	201414	10	4	*	*	*	*	*	*	*	*	*	*	*	*	*	*	*	*	*	*	*	*	*	*	*	*	*	*	*	*	*	*	*	*	*	*	*	*	*	*	*	*
23	Quintana Roo	9	Tulum	108	Kaape Ha	872803	195815	2	2	*	*	*	*	*	*	*	*	*	*	*	*	*	*	*	*	*	*	*	*	*	*	*	*	*	*	*	*	*	*	*	*	*	*	*	*	*	*	*	*
23	Quintana Roo	9	Tulum	112	Laguna Madera	872838	202218	10	8	5	3	0	0	0	8	5	3	8	5	3	8	5	3	8	5	3	8	5	3	0	0	0	0	0	0	0	0	0	0	0	0	0	0	0	0	0	0	1	4
23	Quintana Roo	9	Tulum	113	El Lagunero	872300	201734	10	9	*	*	*	*	*	*	*	*	*	*	*	*	*	*	*	*	*	*	*	*	*	*	*	*	*	*	*	*	*	*	*	*	*	*	*	*	*	*	*	*
23	Quintana Roo	9	Tulum	115	El Pequeño Paraíso	873134	201810	21	10	*	*	*	*	*	*	*	*	*	*	*	*	*	*	*	*	*	*	*	*	*	*	*	*	*	*	*	*	*	*	*	*	*	*	*	*	*	*	*	*
23	Quintana Roo	9	Tulum	116	Ninguno	872256	201917	15	9	6	3	1	1	0	8	5	3	8	5	3	6	3	3	6	3	3	6	3	3	1	1	0	1	1	0	0	0	0	0	0	0	0	0	0	0	0	0	3	0
23	Quintana Roo	9	Tulum	122	Mixba	872801	201516	12	2	*	*	*	*	*	*	*	*	*	*	*	*	*	*	*	*	*	*	*	*	*	*	*	*	*	*	*	*	*	*	*	*	*	*	*	*	*	*	*	*
23	Quintana Roo	9	Tulum	124	Lol Beh	873904	202538	20	5	*	*	*	*	*	*	*	*	*	*	*	*	*	*	*	*	*	*	*	*	*	*	*	*	*	*	*	*	*	*	*	*	*	*	*	*	*	*	*	*
23	Quintana Roo	9	Tulum	128	Luna	872717	200932	0	2	*	*	*	*	*	*	*	*	*	*	*	*	*	*	*	*	*	*	*	*	*	*	*	*	*	*	*	*	*	*	*	*	*	*	*	*	*	*	*	*
23	Quintana Roo	9	Tulum	133	Macario Gómez	873433	202101	20	510	254	256	63	32	31	444	221	223	412	205	207	322	166	156	291	153	138	262	140	122	44	22	22	78	33	45	86	37	49	31	13	18	29	13	16	80	40	40	120	19
23	Quintana Roo	9	Tulum	135	El Manatí	872333	201644	9	3	*	*	*	*	*	*	*	*	*	*	*	*	*	*	*	*	*	*	*	*	*	*	*	*	*	*	*	*	*	*	*	*	*	*	*	*	*	*	*	*
23	Quintana Roo	9	Tulum	136	Manuel Antonio Ay	873916	202552	20	407	210	197	30	14	16	377	196	181	357	186	171	278	148	130	251	131	120	219	113	106	31	13	18	68	35	33	73	40	33	27	17	10	32	18	14	55	30	25	106	16
23	Quintana Roo	9	Tulum	141	Maya Tadeo	872710	195559	0	1	*	*	*	*	*	*	*	*	*	*	*	*	*	*	*	*	*	*	*	*	*	*	*	*	*	*	*	*	*	*	*	*	*	*	*	*	*	*	*	*
23	Quintana Roo	9	Tulum	143	Casa Enrique	872749	200806	1	2	*	*	*	*	*	*	*	*	*	*	*	*	*	*	*	*	*	*	*	*	*	*	*	*	*	*	*	*	*	*	*	*	*	*	*	*	*	*	*	*
23	Quintana Roo	9	Tulum	149	Azúcar	872730	200901	0	1	*	*	*	*	*	*	*	*	*	*	*	*	*	*	*	*	*	*	*	*	*	*	*	*	*	*	*	*	*	*	*	*	*	*	*	*	*	*	*	*
23	Quintana Roo	9	Tulum	150	Noh Áaktun	873651	202325	19	7	*	*	*	*	*	*	*	*	*	*	*	*	*	*	*	*	*	*	*	*	*	*	*	*	*	*	*	*	*	*	*	*	*	*	*	*	*	*	*	*
23	Quintana Roo	9	Tulum	158	El Paraíso	872837	200133	0	1	*	*	*	*	*	*	*	*	*	*	*	*	*	*	*	*	*	*	*	*	*	*	*	*	*	*	*	*	*	*	*	*	*	*	*	*	*	*	*	*
23	Quintana Roo	9	Tulum	160	Paso Juana	872847	200220	0	7	5	2	0	0	0	7	5	2	7	5	2	7	5	2	7	5	2	7	5	2	0	0	0	0	0	0	0	0	0	0	0	0	0	0	0	0	0	0	1	2
23	Quintana Roo	9	Tulum	163	Pedro Paila	872846	200241	0	3	*	*	*	*	*	*	*	*	*	*	*	*	*	*	*	*	*	*	*	*	*	*	*	*	*	*	*	*	*	*	*	*	*	*	*	*	*	*	*	*
23	Quintana Roo	9	Tulum	166	Pesca Maya	872651	195036	2	2	*	*	*	*	*	*	*	*	*	*	*	*	*	*	*	*	*	*	*	*	*	*	*	*	*	*	*	*	*	*	*	*	*	*	*	*	*	*	*	*
23	Quintana Roo	9	Tulum	174	Playa Selva	872735	200842	1	3	*	*	*	*	*	*	*	*	*	*	*	*	*	*	*	*	*	*	*	*	*	*	*	*	*	*	*	*	*	*	*	*	*	*	*	*	*	*	*	*
23	Quintana Roo	9	Tulum	175	Playa Xkanan	872734	200850	0	1	*	*	*	*	*	*	*	*	*	*	*	*	*	*	*	*	*	*	*	*	*	*	*	*	*	*	*	*	*	*	*	*	*	*	*	*	*	*	*	*
23	Quintana Roo	9	Tulum	176	Los Gatos Negros	873056	201749	20	1	*	*	*	*	*	*	*	*	*	*	*	*	*	*	*	*	*	*	*	*	*	*	*	*	*	*	*	*	*	*	*	*	*	*	*	*	*	*	*	*
23	Quintana Roo	9	Tulum	184	Casa de los Pelícanos	872843	200442	1	2	*	*	*	*	*	*	*	*	*	*	*	*	*	*	*	*	*	*	*	*	*	*	*	*	*	*	*	*	*	*	*	*	*	*	*	*	*	*	*	*
23	Quintana Roo	9	Tulum	185	Rancho Alegre	872035	202357	15	2	*	*	*	*	*	*	*	*	*	*	*	*	*	*	*	*	*	*	*	*	*	*	*	*	*	*	*	*	*	*	*	*	*	*	*	*	*	*	*	*
23	Quintana Roo	9	Tulum	187	Jade	872734	200848	0	3	*	*	*	*	*	*	*	*	*	*	*	*	*	*	*	*	*	*	*	*	*	*	*	*	*	*	*	*	*	*	*	*	*	*	*	*	*	*	*	*
23	Quintana Roo	9	Tulum	189	Rancho Mariposa	872045	202404	16	1	*	*	*	*	*	*	*	*	*	*	*	*	*	*	*	*	*	*	*	*	*	*	*	*	*	*	*	*	*	*	*	*	*	*	*	*	*	*	*	*
23	Quintana Roo	9	Tulum	193	Retiro Maya	872713	200944	1	1	*	*	*	*	*	*	*	*	*	*	*	*	*	*	*	*	*	*	*	*	*	*	*	*	*	*	*	*	*	*	*	*	*	*	*	*	*	*	*	*
23	Quintana Roo	9	Tulum	200	Sahcab Mucuy	875832	202455	36	456	229	227	42	20	22	413	208	205	387	194	193	313	156	157	274	135	139	229	112	117	34	19	15	66	33	33	87	47	40	39	21	18	45	23	22	61	31	30	111	22
23	Quintana Roo	9	Tulum	201	San Agustín	872809	201528	13	1	*	*	*	*	*	*	*	*	*	*	*	*	*	*	*	*	*	*	*	*	*	*	*	*	*	*	*	*	*	*	*	*	*	*	*	*	*	*	*	*
23	Quintana Roo	9	Tulum	208	San Isidro	875854	202439	38	3	*	*	*	*	*	*	*	*	*	*	*	*	*	*	*	*	*	*	*	*	*	*	*	*	*	*	*	*	*	*	*	*	*	*	*	*	*	*	*	*
23	Quintana Roo	9	Tulum	209	San José	874158	202928	20	3	*	*	*	*	*	*	*	*	*	*	*	*	*	*	*	*	*	*	*	*	*	*	*	*	*	*	*	*	*	*	*	*	*	*	*	*	*	*	*	*
23	Quintana Roo	9	Tulum	210	San Juan	874332	202501	15	599	317	282	52	24	28	547	293	254	514	272	242	406	209	197	356	184	172	304	155	149	47	26	21	94	58	36	119	70	49	50	25	25	52	29	23	76	40	36	138	37
23	Quintana Roo	9	Tulum	211	San Juan	872606	195236	2	2	*	*	*	*	*	*	*	*	*	*	*	*	*	*	*	*	*	*	*	*	*	*	*	*	*	*	*	*	*	*	*	*	*	*	*	*	*	*	*	*
23	Quintana Roo	9	Tulum	212	San Martín	875757	202305	30	10	*	*	*	*	*	*	*	*	*	*	*	*	*	*	*	*	*	*	*	*	*	*	*	*	*	*	*	*	*	*	*	*	*	*	*	*	*	*	*	*
23	Quintana Roo	9	Tulum	218	Santa Cruz	872040	202429	16	6	*	*	*	*	*	*	*	*	*	*	*	*	*	*	*	*	*	*	*	*	*	*	*	*	*	*	*	*	*	*	*	*	*	*	*	*	*	*	*	*
23	Quintana Roo	9	Tulum	223	Santa Librada	873019	201721	20	24	14	10	3	3	0	21	11	10	20	11	9	15	9	6	13	8	5	12	7	5	2	0	2	4	2	2	5	2	3	2	1	1	1	1	0	2	1	1	4	1
23	Quintana Roo	9	Tulum	225	Santa Martha Fracción Cinco	873623	202246	19	5	*	*	*	*	*	*	*	*	*	*	*	*	*	*	*	*	*	*	*	*	*	*	*	*	*	*	*	*	*	*	*	*	*	*	*	*	*	*	*	*
23	Quintana Roo	9	Tulum	229	Santa Teresa	872441	202215	20	8	*	*	*	*	*	*	*	*	*	*	*	*	*	*	*	*	*	*	*	*	*	*	*	*	*	*	*	*	*	*	*	*	*	*	*	*	*	*	*	*
23	Quintana Roo	9	Tulum	234	Sol Maya	872249	201744	9	3	*	*	*	*	*	*	*	*	*	*	*	*	*	*	*	*	*	*	*	*	*	*	*	*	*	*	*	*	*	*	*	*	*	*	*	*	*	*	*	*
23	Quintana Roo	9	Tulum	236	Dreams Tulum	872408	201508	3	9	5	4	0	0	0	9	5	4	9	5	4	9	5	4	9	5	4	9	5	4	0	0	0	0	0	0	0	0	0	0	0	0	0	0	0	2	0	2	4	1
23	Quintana Roo	9	Tulum	237	Tankah Cuatro	872246	201701	2	68	33	35	6	2	4	62	31	31	59	30	29	48	26	22	45	24	21	43	23	20	4	1	3	10	4	6	9	4	5	3	2	1	2	1	1	7	4	3	16	4
23	Quintana Roo	9	Tulum	240	Tankah Tres	872343	201543	2	76	38	38	3	1	2	73	37	36	72	36	36	64	32	32	61	30	31	53	26	27	2	2	0	7	3	4	7	3	4	3	2	1	8	4	4	4	1	3	24	7
23	Quintana Roo	9	Tulum	241	Tankah Uno	872432	201446	5	3	*	*	*	*	*	*	*	*	*	*	*	*	*	*	*	*	*	*	*	*	*	*	*	*	*	*	*	*	*	*	*	*	*	*	*	*	*	*	*	*
23	Quintana Roo	9	Tulum	243	La Teresita	872221	201830	10	3	*	*	*	*	*	*	*	*	*	*	*	*	*	*	*	*	*	*	*	*	*	*	*	*	*	*	*	*	*	*	*	*	*	*	*	*	*	*	*	*
23	Quintana Roo	9	Tulum	244	Tita Tulum	872732	200856	1	1	*	*	*	*	*	*	*	*	*	*	*	*	*	*	*	*	*	*	*	*	*	*	*	*	*	*	*	*	*	*	*	*	*	*	*	*	*	*	*	*
23	Quintana Roo	9	Tulum	254	El Viejo del Mar	872738	200840	1	1	*	*	*	*	*	*	*	*	*	*	*	*	*	*	*	*	*	*	*	*	*	*	*	*	*	*	*	*	*	*	*	*	*	*	*	*	*	*	*	*
23	Quintana Roo	9	Tulum	257	Las Villas Akumal	871925	202310	2	3	*	*	*	*	*	*	*	*	*	*	*	*	*	*	*	*	*	*	*	*	*	*	*	*	*	*	*	*	*	*	*	*	*	*	*	*	*	*	*	*
23	Quintana Roo	9	Tulum	261	La Hamaca Loca	872746	200808	0	3	*	*	*	*	*	*	*	*	*	*	*	*	*	*	*	*	*	*	*	*	*	*	*	*	*	*	*	*	*	*	*	*	*	*	*	*	*	*	*	*
23	Quintana Roo	9	Tulum	262	Xamach Dos	872728	195639	0	2	*	*	*	*	*	*	*	*	*	*	*	*	*	*	*	*	*	*	*	*	*	*	*	*	*	*	*	*	*	*	*	*	*	*	*	*	*	*	*	*
23	Quintana Roo	9	Tulum	263	Xbecal	875348	202542	30	5	*	*	*	*	*	*	*	*	*	*	*	*	*	*	*	*	*	*	*	*	*	*	*	*	*	*	*	*	*	*	*	*	*	*	*	*	*	*	*	*
23	Quintana Roo	9	Tulum	264	Xcacel	872112	202018	8	18	8	10	0	0	0	18	8	10	18	8	10	17	8	9	15	6	9	15	6	9	0	0	0	1	0	1	3	2	1	2	2	0	0	0	0	7	3	4	8	1
23	Quintana Roo	9	Tulum	267	Yaxché	875650	202025	20	335	159	176	19	9	10	301	143	158	292	138	154	233	109	124	200	99	101	178	88	90	16	8	8	52	26	26	74	28	46	33	10	23	22	11	11	48	25	23	81	21
23	Quintana Roo	9	Tulum	280	Casa Godi	872837	200505	1	3	*	*	*	*	*	*	*	*	*	*	*	*	*	*	*	*	*	*	*	*	*	*	*	*	*	*	*	*	*	*	*	*	*	*	*	*	*	*	*	*
23	Quintana Roo	9	Tulum	284	Casa Tucán	872732	200859	1	1	*	*	*	*	*	*	*	*	*	*	*	*	*	*	*	*	*	*	*	*	*	*	*	*	*	*	*	*	*	*	*	*	*	*	*	*	*	*	*	*
23	Quintana Roo	9	Tulum	288	Cenote Kape-Ha	872726	200912	1	3	*	*	*	*	*	*	*	*	*	*	*	*	*	*	*	*	*	*	*	*	*	*	*	*	*	*	*	*	*	*	*	*	*	*	*	*	*	*	*	*
23	Quintana Roo	9	Tulum	289	Chávez Camping	872734	200855	1	2	*	*	*	*	*	*	*	*	*	*	*	*	*	*	*	*	*	*	*	*	*	*	*	*	*	*	*	*	*	*	*	*	*	*	*	*	*	*	*	*
23	Quintana Roo	9	Tulum	291	Cibal-Yumtzil	873134	201811	22	6	*	*	*	*	*	*	*	*	*	*	*	*	*	*	*	*	*	*	*	*	*	*	*	*	*	*	*	*	*	*	*	*	*	*	*	*	*	*	*	*
23	Quintana Roo	9	Tulum	294	La Esperanza	872737	200842	1	1	*	*	*	*	*	*	*	*	*	*	*	*	*	*	*	*	*	*	*	*	*	*	*	*	*	*	*	*	*	*	*	*	*	*	*	*	*	*	*	*
23	Quintana Roo	9	Tulum	295	Estrella, Sol y Luna	873230	201853	25	5	*	*	*	*	*	*	*	*	*	*	*	*	*	*	*	*	*	*	*	*	*	*	*	*	*	*	*	*	*	*	*	*	*	*	*	*	*	*	*	*
23	Quintana Roo	9	Tulum	297	La Guadalupana	872741	200827	1	5	*	*	*	*	*	*	*	*	*	*	*	*	*	*	*	*	*	*	*	*	*	*	*	*	*	*	*	*	*	*	*	*	*	*	*	*	*	*	*	*
23	Quintana Roo	9	Tulum	299	Hombre de Piedra	873205	201831	23	4	*	*	*	*	*	*	*	*	*	*	*	*	*	*	*	*	*	*	*	*	*	*	*	*	*	*	*	*	*	*	*	*	*	*	*	*	*	*	*	*
23	Quintana Roo	9	Tulum	301	Los Jaguares	873155	201827	23	2	*	*	*	*	*	*	*	*	*	*	*	*	*	*	*	*	*	*	*	*	*	*	*	*	*	*	*	*	*	*	*	*	*	*	*	*	*	*	*	*
23	Quintana Roo	9	Tulum	316	Pablo Ramos	872732	200854	1	2	*	*	*	*	*	*	*	*	*	*	*	*	*	*	*	*	*	*	*	*	*	*	*	*	*	*	*	*	*	*	*	*	*	*	*	*	*	*	*	*
23	Quintana Roo	9	Tulum	318	Playa Morena de Mar	872724	200915	1	1	*	*	*	*	*	*	*	*	*	*	*	*	*	*	*	*	*	*	*	*	*	*	*	*	*	*	*	*	*	*	*	*	*	*	*	*	*	*	*	*
23	Quintana Roo	9	Tulum	320	Rescate Malix	872735	200843	1	1	*	*	*	*	*	*	*	*	*	*	*	*	*	*	*	*	*	*	*	*	*	*	*	*	*	*	*	*	*	*	*	*	*	*	*	*	*	*	*	*
23	Quintana Roo	9	Tulum	322	Samasati	872726	200907	1	4	*	*	*	*	*	*	*	*	*	*	*	*	*	*	*	*	*	*	*	*	*	*	*	*	*	*	*	*	*	*	*	*	*	*	*	*	*	*	*	*
23	Quintana Roo	9	Tulum	323	San Judas Tadeo	873216	201850	25	5	*	*	*	*	*	*	*	*	*	*	*	*	*	*	*	*	*	*	*	*	*	*	*	*	*	*	*	*	*	*	*	*	*	*	*	*	*	*	*	*
23	Quintana Roo	9	Tulum	324	Sian Ka'an Artistas	872704	195011	2	1	*	*	*	*	*	*	*	*	*	*	*	*	*	*	*	*	*	*	*	*	*	*	*	*	*	*	*	*	*	*	*	*	*	*	*	*	*	*	*	*
23	Quintana Roo	9	Tulum	325	El Teterete	872157	202104	13	3	*	*	*	*	*	*	*	*	*	*	*	*	*	*	*	*	*	*	*	*	*	*	*	*	*	*	*	*	*	*	*	*	*	*	*	*	*	*	*	*
23	Quintana Roo	9	Tulum	326	La Vía Láctea	872748	200807	1	2	*	*	*	*	*	*	*	*	*	*	*	*	*	*	*	*	*	*	*	*	*	*	*	*	*	*	*	*	*	*	*	*	*	*	*	*	*	*	*	*
23	Quintana Roo	9	Tulum	327	Villa Destini	872832	200520	1	2	*	*	*	*	*	*	*	*	*	*	*	*	*	*	*	*	*	*	*	*	*	*	*	*	*	*	*	*	*	*	*	*	*	*	*	*	*	*	*	*
23	Quintana Roo	9	Tulum	330	Xi-Cho	872748	200808	1	2	*	*	*	*	*	*	*	*	*	*	*	*	*	*	*	*	*	*	*	*	*	*	*	*	*	*	*	*	*	*	*	*	*	*	*	*	*	*	*	*
23	Quintana Roo	9	Tulum	334	El Álamo	873107	201752	21	2	*	*	*	*	*	*	*	*	*	*	*	*	*	*	*	*	*	*	*	*	*	*	*	*	*	*	*	*	*	*	*	*	*	*	*	*	*	*	*	*
23	Quintana Roo	9	Tulum	336	Alebrijes	873843	202520	20	6	*	*	*	*	*	*	*	*	*	*	*	*	*	*	*	*	*	*	*	*	*	*	*	*	*	*	*	*	*	*	*	*	*	*	*	*	*	*	*	*
23	Quintana Roo	9	Tulum	337	Aluxes	873724	202358	19	1	*	*	*	*	*	*	*	*	*	*	*	*	*	*	*	*	*	*	*	*	*	*	*	*	*	*	*	*	*	*	*	*	*	*	*	*	*	*	*	*
23	Quintana Roo	9	Tulum	338	Las Amarantas	873651	202319	19	2	*	*	*	*	*	*	*	*	*	*	*	*	*	*	*	*	*	*	*	*	*	*	*	*	*	*	*	*	*	*	*	*	*	*	*	*	*	*	*	*
23	Quintana Roo	9	Tulum	339	Antonio Pool	873114	201754	21	5	*	*	*	*	*	*	*	*	*	*	*	*	*	*	*	*	*	*	*	*	*	*	*	*	*	*	*	*	*	*	*	*	*	*	*	*	*	*	*	*
23	Quintana Roo	9	Tulum	340	El Árbol	873036	201735	20	1	*	*	*	*	*	*	*	*	*	*	*	*	*	*	*	*	*	*	*	*	*	*	*	*	*	*	*	*	*	*	*	*	*	*	*	*	*	*	*	*
23	Quintana Roo	9	Tulum	342	Balam Luum	872851	201719	16	3	*	*	*	*	*	*	*	*	*	*	*	*	*	*	*	*	*	*	*	*	*	*	*	*	*	*	*	*	*	*	*	*	*	*	*	*	*	*	*	*
23	Quintana Roo	9	Tulum	345	Los Capulines	873738	202403	19	3	*	*	*	*	*	*	*	*	*	*	*	*	*	*	*	*	*	*	*	*	*	*	*	*	*	*	*	*	*	*	*	*	*	*	*	*	*	*	*	*
23	Quintana Roo	9	Tulum	346	La Casa de las Mariposas	873815	202440	19	2	*	*	*	*	*	*	*	*	*	*	*	*	*	*	*	*	*	*	*	*	*	*	*	*	*	*	*	*	*	*	*	*	*	*	*	*	*	*	*	*
23	Quintana Roo	9	Tulum	347	Casa del Niño	872834	200513	1	1	*	*	*	*	*	*	*	*	*	*	*	*	*	*	*	*	*	*	*	*	*	*	*	*	*	*	*	*	*	*	*	*	*	*	*	*	*	*	*	*
23	Quintana Roo	9	Tulum	351	La Ceiba	873930	202616	20	1	*	*	*	*	*	*	*	*	*	*	*	*	*	*	*	*	*	*	*	*	*	*	*	*	*	*	*	*	*	*	*	*	*	*	*	*	*	*	*	*
23	Quintana Roo	9	Tulum	353	Cenote Calavera	872730	201344	10	6	*	*	*	*	*	*	*	*	*	*	*	*	*	*	*	*	*	*	*	*	*	*	*	*	*	*	*	*	*	*	*	*	*	*	*	*	*	*	*	*
23	Quintana Roo	9	Tulum	361	Colorado	873552	202225	20	4	*	*	*	*	*	*	*	*	*	*	*	*	*	*	*	*	*	*	*	*	*	*	*	*	*	*	*	*	*	*	*	*	*	*	*	*	*	*	*	*
23	Quintana Roo	9	Tulum	363	La Consentida	873853	202532	20	3	*	*	*	*	*	*	*	*	*	*	*	*	*	*	*	*	*	*	*	*	*	*	*	*	*	*	*	*	*	*	*	*	*	*	*	*	*	*	*	*
23	Quintana Roo	9	Tulum	367	Los Delfines (Xamach Uno)	872723	195623	0	1	*	*	*	*	*	*	*	*	*	*	*	*	*	*	*	*	*	*	*	*	*	*	*	*	*	*	*	*	*	*	*	*	*	*	*	*	*	*	*	*
23	Quintana Roo	9	Tulum	371	Las Dos Luces	873105	201751	20	7	3	4	1	1	0	6	2	4	6	2	4	5	2	3	4	2	2	4	2	2	0	0	0	1	0	1	2	0	2	1	0	1	0	0	0	0	0	0	1	1
23	Quintana Roo	9	Tulum	372	Dos Ojos	873418	200906	10	5	*	*	*	*	*	*	*	*	*	*	*	*	*	*	*	*	*	*	*	*	*	*	*	*	*	*	*	*	*	*	*	*	*	*	*	*	*	*	*	*
23	Quintana Roo	9	Tulum	382	La Herencia	873029	201149	10	1	*	*	*	*	*	*	*	*	*	*	*	*	*	*	*	*	*	*	*	*	*	*	*	*	*	*	*	*	*	*	*	*	*	*	*	*	*	*	*	*
23	Quintana Roo	9	Tulum	383	India Blanca	872902	201654	16	3	*	*	*	*	*	*	*	*	*	*	*	*	*	*	*	*	*	*	*	*	*	*	*	*	*	*	*	*	*	*	*	*	*	*	*	*	*	*	*	*
23	Quintana Roo	9	Tulum	385	Kukulkán	872947	201703	20	6	*	*	*	*	*	*	*	*	*	*	*	*	*	*	*	*	*	*	*	*	*	*	*	*	*	*	*	*	*	*	*	*	*	*	*	*	*	*	*	*
23	Quintana Roo	9	Tulum	386	Le Hoxu'ul Haltun	873246	201040	10	1	*	*	*	*	*	*	*	*	*	*	*	*	*	*	*	*	*	*	*	*	*	*	*	*	*	*	*	*	*	*	*	*	*	*	*	*	*	*	*	*
23	Quintana Roo	9	Tulum	389	Ninguno	873957	202649	18	1	*	*	*	*	*	*	*	*	*	*	*	*	*	*	*	*	*	*	*	*	*	*	*	*	*	*	*	*	*	*	*	*	*	*	*	*	*	*	*	*
23	Quintana Roo	9	Tulum	390	Ninguno	873955	202646	19	8	*	*	*	*	*	*	*	*	*	*	*	*	*	*	*	*	*	*	*	*	*	*	*	*	*	*	*	*	*	*	*	*	*	*	*	*	*	*	*	*
23	Quintana Roo	9	Tulum	391	Ninguno	873951	202642	19	4	*	*	*	*	*	*	*	*	*	*	*	*	*	*	*	*	*	*	*	*	*	*	*	*	*	*	*	*	*	*	*	*	*	*	*	*	*	*	*	*
23	Quintana Roo	9	Tulum	392	Ninguno	873947	202636	20	2	*	*	*	*	*	*	*	*	*	*	*	*	*	*	*	*	*	*	*	*	*	*	*	*	*	*	*	*	*	*	*	*	*	*	*	*	*	*	*	*
23	Quintana Roo	9	Tulum	393	Ninguno	873924	202609	20	1	*	*	*	*	*	*	*	*	*	*	*	*	*	*	*	*	*	*	*	*	*	*	*	*	*	*	*	*	*	*	*	*	*	*	*	*	*	*	*	*
23	Quintana Roo	9	Tulum	394	Ninguno	873920	202605	20	1	*	*	*	*	*	*	*	*	*	*	*	*	*	*	*	*	*	*	*	*	*	*	*	*	*	*	*	*	*	*	*	*	*	*	*	*	*	*	*	*
23	Quintana Roo	9	Tulum	395	Ninguno	873751	202416	19	2	*	*	*	*	*	*	*	*	*	*	*	*	*	*	*	*	*	*	*	*	*	*	*	*	*	*	*	*	*	*	*	*	*	*	*	*	*	*	*	*
23	Quintana Roo	9	Tulum	397	Ninguno	873635	202303	19	5	*	*	*	*	*	*	*	*	*	*	*	*	*	*	*	*	*	*	*	*	*	*	*	*	*	*	*	*	*	*	*	*	*	*	*	*	*	*	*	*
23	Quintana Roo	9	Tulum	400	Ninguno	873546	202214	20	2	*	*	*	*	*	*	*	*	*	*	*	*	*	*	*	*	*	*	*	*	*	*	*	*	*	*	*	*	*	*	*	*	*	*	*	*	*	*	*	*
[truncated: 24 more rows]
[truncated: 151 more columns]
