# Supplementary material
Source: MDPI journal article supplement (https://www.mdpi.com/1424-2818/12/9/338)
Supplement: s1 [file s1 › Supplementary material/S6_Temperature_yearly_means.xlsx]

## Sheet: Hoja1
Sites	Year	Time	Latitude	Longitude	Longitude 2	Region	Temperature
1	2005	10	18.25	-87.75	272.25	South	28.0607
1	2006	11	18.25	-87.75	272.25	South	28.0243
1	2007	12	18.25	-87.75	272.25	South	28.2252
1	2008	13	18.25	-87.75	272.25	South	27.755
1	2009	14	18.25	-87.75	272.25	South	27.9678
1	2010	15	18.25	-87.75	272.25	South	28.0434
1	2011	16	18.25	-87.75	272.25	South	27.9564
1	2012	17	18.25	-87.75	272.25	South	27.9797
1	2013	18	18.25	-87.75	272.25	South	28.0266
1	2014	19	18.25	-87.75	272.25	South	28.0635
1	2015	20	18.25	-87.75	272.25	South	28.2088
1	2016	21	18.25	-87.75	272.25	South	28.423
2	2005	10	18.5	-87.75	272.25	South	28.0301
2	2006	11	18.5	-87.75	272.25	South	28.0083
2	2007	12	18.5	-87.75	272.25	South	28.2165
2	2008	13	18.5	-87.75	272.25	South	27.7512
2	2009	14	18.5	-87.75	272.25	South	27.9583
2	2010	15	18.5	-87.75	272.25	South	28.0576
2	2011	16	18.5	-87.75	272.25	South	27.966
2	2012	17	18.5	-87.75	272.25	South	27.9871
2	2013	18	18.5	-87.75	272.25	South	28.0082
2	2014	19	18.5	-87.75	272.25	South	28.0817
2	2015	20	18.5	-87.75	272.25	South	28.2089
2	2016	21	18.5	-87.75	272.25	South	28.4262
3	2005	10	18.75	-87.75	272.25	South	27.9645
3	2006	11	18.75	-87.75	272.25	South	27.9671
3	2007	12	18.75	-87.75	272.25	South	28.2081
3	2008	13	18.75	-87.75	272.25	South	27.7583
3	2009	14	18.75	-87.75	272.25	South	27.9337
3	2010	15	18.75	-87.75	272.25	South	28.1106
3	2011	16	18.75	-87.75	272.25	South	27.9704
3	2012	17	18.75	-87.75	272.25	South	27.9957
3	2013	18	18.75	-87.75	272.25	South	27.9705
3	2014	19	18.75	-87.75	272.25	South	28.0955
3	2015	20	18.75	-87.75	272.25	South	28.199
3	2016	21	18.75	-87.75	272.25	South	28.4447
4	2005	10	18.75	-87.5	272.5	South	27.9567
4	2006	11	18.75	-87.5	272.5	South	27.9731
4	2007	12	18.75	-87.5	272.5	South	28.2023
4	2008	13	18.75	-87.5	272.5	South	27.7706
4	2009	14	18.75	-87.5	272.5	South	27.935
4	2010	15	18.75	-87.5	272.5	South	28.1213
4	2011	16	18.75	-87.5	272.5	South	27.9799
4	2012	17	18.75	-87.5	272.5	South	27.9916
4	2013	18	18.75	-87.5	272.5	South	27.9753
4	2014	19	18.75	-87.5	272.5	South	28.1045
4	2015	20	18.75	-87.5	272.5	South	28.3001
4	2016	21	18.75	-87.5	272.5	South	28.5484
5	2005	10	19	-87.75	272.25	South	27.9514
5	2006	11	19	-87.75	272.25	South	27.9525
5	2007	12	19	-87.75	272.25	South	28.2074
5	2008	13	19	-87.75	272.25	South	27.7587
5	2009	14	19	-87.75	272.25	South	27.9293
5	2010	15	19	-87.75	272.25	South	28.1116
5	2011	16	19	-87.75	272.25	South	27.9701
5	2012	17	19	-87.75	272.25	South	27.9931
5	2013	18	19	-87.75	272.25	South	27.9599
5	2014	19	19	-87.75	272.25	South	28.0957
5	2015	20	19	-87.75	272.25	South	28.201
5	2016	21	19	-87.75	272.25	South	28.4465
6	2005	10	19.25	-87.5	272.5	Center	27.9089
6	2006	11	19.25	-87.5	272.5	Center	27.9257
6	2007	12	19.25	-87.5	272.5	Center	28.1675
6	2008	13	19.25	-87.5	272.5	Center	27.7638
6	2009	14	19.25	-87.5	272.5	Center	27.9184
6	2010	15	19.25	-87.5	272.5	Center	28.1106
6	2011	16	19.25	-87.5	272.5	Center	27.9664
6	2012	17	19.25	-87.5	272.5	Center	27.9545
6	2013	18	19.25	-87.5	272.5	Center	27.9401
6	2014	19	19.25	-87.5	272.5	Center	28.0824
6	2015	20	19.25	-87.5	272.5	Center	28.192
6	2016	21	19.25	-87.5	272.5	Center	28.4052
7	2005	10	19.25	-87	273	Center	27.9702
7	2006	11	19.25	-87	273	Center	28.0085
7	2007	12	19.25	-87	273	Center	28.1756
7	2008	13	19.25	-87	273	Center	27.7935
7	2009	14	19.25	-87	273	Center	27.9438
7	2010	15	19.25	-87	273	Center	28.1323
7	2011	16	19.25	-87	273	Center	28.0104
7	2012	17	19.25	-87	273	Center	27.9773
7	2013	18	19.25	-87	273	Center	28.0025
7	2014	19	19.25	-87	273	Center	28.1392
7	2015	20	19.25	-87	273	Center	28.2228
7	2016	21	19.25	-87	273	Center	28.4149
8	2005	10	19.5	-87.5	272.5	Center	27.8603
8	2006	11	19.5	-87.5	272.5	Center	27.896
8	2007	12	19.5	-87.5	272.5	Center	28.1619
8	2008	13	19.5	-87.5	272.5	Center	27.7344
8	2009	14	19.5	-87.5	272.5	Center	27.8934
8	2010	15	19.5	-87.5	272.5	Center	28.079
8	2011	16	19.5	-87.5	272.5	Center	27.919
8	2012	17	19.5	-87.5	272.5	Center	27.9235
8	2013	18	19.5	-87.5	272.5	Center	27.9009
8	2014	19	19.5	-87.5	272.5	Center	28.0308
8	2015	20	19.5	-87.5	272.5	Center	28.1669
8	2016	21	19.5	-87.5	272.5	Center	28.3726
9	2005	10	19.75	-87.5	272.5	Center	27.8547
9	2006	11	19.75	-87.5	272.5	Center	27.9111
9	2007	12	19.75	-87.5	272.5	Center	28.1583
9	2008	13	19.75	-87.5	272.5	Center	27.7404
9	2009	14	19.75	-87.5	272.5	Center	27.8881
9	2010	15	19.75	-87.5	272.5	Center	28.0734
9	2011	16	19.75	-87.5	272.5	Center	27.9136
9	2012	17	19.75	-87.5	272.5	Center	27.9166
9	2013	18	19.75	-87.5	272.5	Center	27.9042
9	2014	19	19.75	-87.5	272.5	Center	28.0289
9	2015	20	19.75	-87.5	272.5	Center	28.159
9	2016	21	19.75	-87.5	272.5	Center	28.3698
10	2005	10	20	-87.5	272.5	North	27.8866
10	2006	11	20	-87.5	272.5	North	27.9754
10	2007	12	20	-87.5	272.5	North	28.1452
10	2008	13	20	-87.5	272.5	North	27.7698
10	2009	14	20	-87.5	272.5	North	27.8938
10	2010	15	20	-87.5	272.5	North	28.0805
10	2011	16	20	-87.5	272.5	North	27.9339
10	2012	17	20	-87.5	272.5	North	27.9232
10	2013	18	20	-87.5	272.5	North	27.9484
10	2014	19	20	-87.5	272.5	North	28.0683
10	2015	20	20	-87.5	272.5	North	28.162
10	2016	21	20	-87.5	272.5	North	28.3903
11	2005	10	20.25	-87.5	272.5	North	27.8892
11	2006	11	20.25	-87.5	272.5	North	27.9905
11	2007	12	20.25	-87.5	272.5	North	28.1391
11	2008	13	20.25	-87.5	272.5	North	27.769
11	2009	14	20.25	-87.5	272.5	North	27.8911
11	2010	15	20.25	-87.5	272.5	North	28.074
11	2011	16	20.25	-87.5	272.5	North	27.9305
11	2012	17	20.25	-87.5	272.5	North	27.9247
11	2013	18	20.25	-87.5	272.5	North	27.9535
11	2014	19	20.25	-87.5	272.5	North	28.0754
11	2015	20	20.25	-87.5	272.5	North	28.1611
11	2016	21	20.25	-87.5	272.5	North	28.3968
12	2005	10	20.25	-87.25	272.75	North	27.9015
12	2006	11	20.25	-87.25	272.75	North	28.0072
12	2007	12	20.25	-87.25	272.75	North	28.1237
12	2008	13	20.25	-87.25	272.75	North	27.7725
12	2009	14	20.25	-87.25	272.75	North	27.8883
12	2010	15	20.25	-87.25	272.75	North	28.0737
12	2011	16	20.25	-87.25	272.75	North	27.9322
12	2012	17	20.25	-87.25	272.75	North	27.9337
12	2013	18	20.25	-87.25	272.75	North	27.9724
12	2014	19	20.25	-87.25	272.75	North	28.0883
12	2015	20	20.25	-87.25	272.75	North	28.1702
12	2016	21	20.25	-87.25	272.75	North	28.4127
13	2005	10	20.25	-87	273	North	27.9174
13	2006	11	20.25	-87	273	North	28.0156
13	2007	12	20.25	-87	273	North	28.1187
13	2008	13	20.25	-87	273	North	27.785
13	2009	14	20.25	-87	273	North	27.9018
13	2010	15	20.25	-87	273	North	28.0821
13	2011	16	20.25	-87	273	North	27.9481
13	2012	17	20.25	-87	273	North	27.9507
13	2013	18	20.25	-87	273	North	28.0007
13	2014	19	20.25	-87	273	North	28.1062
13	2015	20	20.25	-87	273	North	27.836
13	2016	21	20.25	-87	273	North	28.1985
14	2005	10	20.5	-87.25	272.75	North	27.8809
14	2006	11	20.5	-87.25	272.75	North	28.0231
14	2007	12	20.5	-87.25	272.75	North	28.0674
14	2008	13	20.5	-87.25	272.75	North	27.7353
14	2009	14	20.5	-87.25	272.75	North	27.8406
14	2010	15	20.5	-87.25	272.75	North	28.0269
14	2011	16	20.5	-87.25	272.75	North	27.8802
14	2012	17	20.5	-87.25	272.75	North	27.9101
14	2013	18	20.5	-87.25	272.75	North	27.9513
14	2014	19	20.5	-87.25	272.75	North	28.0617
14	2015	20	20.5	-87.25	272.75	North	28.1428
14	2016	21	20.5	-87.25	272.75	North	28.4091
15	2005	10	20.5	-87	273	North	27.8834
15	2006	11	20.5	-87	273	North	28.0106
15	2007	12	20.5	-87	273	North	28.0703
15	2008	13	20.5	-87	273	North	27.7425
15	2009	14	20.5	-87	273	North	27.8502
15	2010	15	20.5	-87	273	North	28.0297
15	2011	16	20.5	-87	273	North	27.8926
15	2012	17	20.5	-87	273	North	27.9181
15	2013	18	20.5	-87	273	North	27.9617
15	2014	19	20.5	-87	273	North	28.0682
15	2015	20	20.5	-87	273	North	28.157
15	2016	21	20.5	-87	273	North	28.4093
16	2005	10	20.5	-86.75	273.25	North	27.8924
16	2006	11	20.5	-86.75	273.25	North	27.9924
16	2007	12	20.5	-86.75	273.25	North	28.0839
16	2008	13	20.5	-86.75	273.25	North	27.7616
16	2009	14	20.5	-86.75	273.25	North	27.8814
16	2010	15	20.5	-86.75	273.25	North	28.0433
16	2011	16	20.5	-86.75	273.25	North	27.9217
16	2012	17	20.5	-86.75	273.25	North	27.9451
16	2013	18	20.5	-86.75	273.25	North	27.9948
16	2014	19	20.5	-86.75	273.25	North	28.0881
16	2015	20	20.5	-86.75	273.25	North	28.2
16	2016	21	20.5	-86.75	273.25	North	28.4169
18	2005	10	20.75	-87	273	North	27.844
18	2006	11	20.75	-87	273	North	27.9716
18	2007	12	20.75	-87	273	North	28.025
18	2008	13	20.75	-87	273	North	27.6908
18	2009	14	20.75	-87	273	North	27.7957
18	2010	15	20.75	-87	273	North	27.9679
18	2011	16	20.75	-87	273	North	27.8382
18	2012	17	20.75	-87	273	North	27.8716
18	2013	18	20.75	-87	273	North	27.9193
18	2014	19	20.75	-87	273	North	28.0101
18	2015	20	20.75	-87	273	North	28.1119
18	2016	21	20.75	-87	273	North	28.3671
19	2005	10	20.75	-84.75	275.25	North	28.061
19	2006	11	20.75	-84.75	275.25	North	28.1807
19	2007	12	20.75	-84.75	275.25	North	28.1872
19	2008	13	20.75	-84.75	275.25	North	27.8478
19	2009	14	20.75	-84.75	275.25	North	28.0141
19	2010	15	20.75	-84.75	275.25	North	28.0093
19	2011	16	20.75	-84.75	275.25	North	27.915
19	2012	17	20.75	-84.75	275.25	North	27.9539
19	2013	18	20.75	-84.75	275.25	North	28.0403
19	2014	19	20.75	-84.75	275.25	North	28.2304
19	2015	20	20.75	-84.75	275.25	North	28.4289
19	2016	21	20.75	-84.75	275.25	North	28.4532
20	2005	10	21	-86.75	273.25	North	27.7826
20	2006	11	21	-86.75	273.25	North	27.8158
20	2007	12	21	-86.75	273.25	North	27.9666
20	2008	13	21	-86.75	273.25	North	27.6092
20	2009	14	21	-86.75	273.25	North	27.7393
20	2010	15	21	-86.75	273.25	North	27.8605
20	2011	16	21	-86.75	273.25	North	27.7638
20	2012	17	21	-86.75	273.25	North	27.8036
20	2013	18	21	-86.75	273.25	North	27.872
20	2014	19	21	-86.75	273.25	North	27.9301
20	2015	20	21	-86.75	273.25	North	28.0678
20	2016	21	21	-86.75	273.25	North	28.2755
21	2005	10	21.25	-86.75	273.25	North	27.6502
21	2006	11	21.25	-86.75	273.25	North	27.5605
21	2007	12	21.25	-86.75	273.25	North	27.8089
21	2008	13	21.25	-86.75	273.25	North	27.4164
21	2009	14	21.25	-86.75	273.25	North	27.5887
21	2010	15	21.25	-86.75	273.25	North	27.6043
21	2011	16	21.25	-86.75	273.25	North	27.555
21	2012	17	21.25	-86.75	273.25	North	27.6318
21	2013	18	21.25	-86.75	273.25	North	27.7165
21	2014	19	21.25	-86.75	273.25	North	27.7474
21	2015	20	21.25	-86.75	273.25	North	27.9172
21	2016	21	21.25	-86.75	273.25	North	28.0733
22	2005	10	21.5	-87.75	272.25	North	26.2349
22	2006	11	21.5	-87.75	272.25	North	25.7317
22	2007	12	21.5	-87.75	272.25	North	25.6401
22	2008	13	21.5	-87.75	272.25	North	25.3773
22	2009	14	21.5	-87.75	272.25	North	25.4208
22	2010	15	21.5	-87.75	272.25	North	25.2329
22	2011	16	21.5	-87.75	272.25	North	24.996
22	2012	17	21.5	-87.75	272.25	North	25.776
22	2013	18	21.5	-87.75	272.25	North	25.8249
22	2014	19	21.5	-87.75	272.25	North	25.635
22	2015	20	21.5	-87.75	272.25	North	25.8155
22	2016	21	21.5	-87.75	272.25	North	26.304
23	2005	10	21.5	-86.75	273.25	North	27.2393
23	2006	11	21.5	-86.75	273.25	North	27.0205
23	2007	12	21.5	-86.75	273.25	North	27.2651
23	2008	13	21.5	-86.75	273.25	North	26.8711
23	2009	14	21.5	-86.75	273.25	North	27.0777
23	2010	15	21.5	-86.75	273.25	North	26.8945
23	2011	16	21.5	-86.75	273.25	North	26.9053
23	2012	17	21.5	-86.75	273.25	North	27.155
23	2013	18	21.5	-86.75	273.25	North	27.2036
23	2014	19	21.5	-86.75	273.25	North	27.226
23	2015	20	21.5	-86.75	273.25	North	27.4187
23	2016	21	21.5	-86.75	273.25	North	27.5491
