# Supplementary material
Source: MDPI journal article supplement (https://www.mdpi.com/1424-2818/12/9/338)
Supplement: s1 [file s1 › Supplementary material/S7_Chl_yearly_means.xlsx]

## Sheet: Hoja1
Year	Sites	Latitude	Longitude	Longitude 2	Chl
2000	1	18.25	-87.75	272.25	2.25401
2001	1	18.25	-87.75	272.25	0.997141
2002	1	18.25	-87.75	272.25	0.378586
2003	1	18.25	-87.75	272.25	0.419618
2004	1	18.25	-87.75	272.25	0.959309
2005	1	18.25	-87.75	272.25	1.87497
2006	1	18.25	-87.75	272.25	1.34112
2007	1	18.25	-87.75	272.25	1.72532
2008	1	18.25	-87.75	272.25	1.51604
2009	1	18.25	-87.75	272.25	0.88765
2010	1	18.25	-87.75	272.25	1.16825
2011	1	18.25	-87.75	272.25	1.55761
2012	1	18.25	-87.75	272.25	1.1556
2013	1	18.25	-87.75	272.25	1.78018
2014	1	18.25	-87.75	272.25	0.738102
2015	1	18.25	-87.75	272.25	0.852714
2016	1	18.25	-87.75	272.25	0.835658
2000	2	18.5	-87.75	272.25	1.52945
2001	2	18.5	-87.75	272.25	0.815428
2002	2	18.5	-87.75	272.25	0.361528
2003	2	18.5	-87.75	272.25	0.35603
2004	2	18.5	-87.75	272.25	0.805651
2005	2	18.5	-87.75	272.25	1.31206
2006	2	18.5	-87.75	272.25	1.09912
2007	2	18.5	-87.75	272.25	1.46016
2008	2	18.5	-87.75	272.25	0.918759
2009	2	18.5	-87.75	272.25	0.727768
2010	2	18.5	-87.75	272.25	0.993368
2011	2	18.5	-87.75	272.25	1.49847
2012	2	18.5	-87.75	272.25	0.930249
2013	2	18.5	-87.75	272.25	1.35276
2014	2	18.5	-87.75	272.25	0.552952
2015	2	18.5	-87.75	272.25	0.703378
2016	2	18.5	-87.75	272.25	0.666219
2000	3	18.75	-87.75	272.25	0.178866
2001	3	18.75	-87.75	272.25	0.186838
2002	3	18.75	-87.75	272.25	0.19401
2003	3	18.75	-87.75	272.25	0.190557
2004	3	18.75	-87.75	272.25	0.250574
2005	3	18.75	-87.75	272.25	0.180234
2006	3	18.75	-87.75	272.25	0.202604
2007	3	18.75	-87.75	272.25	0.226269
2008	3	18.75	-87.75	272.25	0.25541
2009	3	18.75	-87.75	272.25	0.208132
2010	3	18.75	-87.75	272.25	0.267118
2011	3	18.75	-87.75	272.25	0.222011
2012	3	18.75	-87.75	272.25	0.200086
2013	3	18.75	-87.75	272.25	0.259596
2014	3	18.75	-87.75	272.25	0.24016
2015	3	18.75	-87.75	272.25	0.246001
2016	3	18.75	-87.75	272.25	0.230598
2000	4	18.75	-87.5	272.5	0.178866
2001	4	18.75	-87.5	272.5	0.186838
2002	4	18.75	-87.5	272.5	0.19401
2003	4	18.75	-87.5	272.5	0.190557
2004	4	18.75	-87.5	272.5	0.250574
2005	4	18.75	-87.5	272.5	0.180234
2006	4	18.75	-87.5	272.5	0.202604
2007	4	18.75	-87.5	272.5	0.226269
2008	4	18.75	-87.5	272.5	0.25541
2009	4	18.75	-87.5	272.5	0.208132
2010	4	18.75	-87.5	272.5	0.267118
2011	4	18.75	-87.5	272.5	0.222011
2012	4	18.75	-87.5	272.5	0.200086
2013	4	18.75	-87.5	272.5	0.259596
2014	4	18.75	-87.5	272.5	0.24016
2015	4	18.75	-87.5	272.5	0.246001
2016	4	18.75	-87.5	272.5	0.230598
2000	5	19	-87.75	272.25	0.123399
2001	5	19	-87.75	272.25	0.133396
2002	5	19	-87.75	272.25	0.123067
2003	5	19	-87.75	272.25	0.128913
2004	5	19	-87.75	272.25	0.121334
2005	5	19	-87.75	272.25	0.132447
2006	5	19	-87.75	272.25	0.119269
2007	5	19	-87.75	272.25	0.12917
2008	5	19	-87.75	272.25	0.144425
2009	5	19	-87.75	272.25	0.11914
2010	5	19	-87.75	272.25	0.13235
2011	5	19	-87.75	272.25	0.120046
2012	5	19	-87.75	272.25	0.125669
2013	5	19	-87.75	272.25	0.137229
2014	5	19	-87.75	272.25	0.132171
2015	5	19	-87.75	272.25	0.119573
2016	5	19	-87.75	272.25	0.12853
2000	6	19.25	-87.5	272.5	1.84985
2001	6	19.25	-87.5	272.5	1.23913
2002	6	19.25	-87.5	272.5	0.965378
2003	6	19.25	-87.5	272.5	0.742186
2004	6	19.25	-87.5	272.5	0.705655
2005	6	19.25	-87.5	272.5	0.73932
2006	6	19.25	-87.5	272.5	0.56356
2007	6	19.25	-87.5	272.5	1.69491
2008	6	19.25	-87.5	272.5	1.97404
2009	6	19.25	-87.5	272.5	0.674922
2010	6	19.25	-87.5	272.5	1.03848
2011	6	19.25	-87.5	272.5	0.950675
2012	6	19.25	-87.5	272.5	0.660371
2013	6	19.25	-87.5	272.5	1.93226
2014	6	19.25	-87.5	272.5	1.35824
2015	6	19.25	-87.5	272.5	1.46198
2016	6	19.25	-87.5	272.5	1.0204
2000	7	19.25	-87	273	0.101508
2001	7	19.25	-87	273	0.113704
2002	7	19.25	-87	273	0.101558
2003	7	19.25	-87	273	0.111317
2004	7	19.25	-87	273	0.109886
2005	7	19.25	-87	273	0.117557
2006	7	19.25	-87	273	0.100698
2007	7	19.25	-87	273	0.107526
2008	7	19.25	-87	273	0.112199
2009	7	19.25	-87	273	0.0979304
2010	7	19.25	-87	273	0.111871
2011	7	19.25	-87	273	0.0997613
2012	7	19.25	-87	273	0.104508
2013	7	19.25	-87	273	0.111884
2014	7	19.25	-87	273	0.113879
2015	7	19.25	-87	273	0.111878
2016	7	19.25	-87	273	0.104753
2000	8	19.5	-87.5	272.5	2.84768
2001	8	19.5	-87.5	272.5	1.97645
2002	8	19.5	-87.5	272.5	1.77368
2003	8	19.5	-87.5	272.5	1.62891
2004	8	19.5	-87.5	272.5	1.335
2005	8	19.5	-87.5	272.5	1.61863
2006	8	19.5	-87.5	272.5	1.29351
2007	8	19.5	-87.5	272.5	2.86037
2008	8	19.5	-87.5	272.5	3.52827
2009	8	19.5	-87.5	272.5	1.36484
2010	8	19.5	-87.5	272.5	1.70391
2011	8	19.5	-87.5	272.5	1.68118
2012	8	19.5	-87.5	272.5	1.47929
2013	8	19.5	-87.5	272.5	3.83201
2014	8	19.5	-87.5	272.5	2.57597
2015	8	19.5	-87.5	272.5	2.24092
2016	8	19.5	-87.5	272.5	1.58857
2000	9	19.75	-87.5	272.5	1.67826
2001	9	19.75	-87.5	272.5	1.28464
2002	9	19.75	-87.5	272.5	1.44599
2003	9	19.75	-87.5	272.5	1.29701
2004	9	19.75	-87.5	272.5	1.115
2005	9	19.75	-87.5	272.5	1.3513
2006	9	19.75	-87.5	272.5	1.15602
2007	9	19.75	-87.5	272.5	1.73277
2008	9	19.75	-87.5	272.5	2.22842
2009	9	19.75	-87.5	272.5	1.13959
2010	9	19.75	-87.5	272.5	1.11332
2011	9	19.75	-87.5	272.5	1.19158
2012	9	19.75	-87.5	272.5	1.21321
2013	9	19.75	-87.5	272.5	2.78647
2014	9	19.75	-87.5	272.5	1.77195
2015	9	19.75	-87.5	272.5	1.43313
2016	9	19.75	-87.5	272.5	0.990289
2000	10	20	-87.5	272.5	0.538929
2001	10	20	-87.5	272.5	0.519146
2002	10	20	-87.5	272.5	0.654189
2003	10	20	-87.5	272.5	0.40054
2004	10	20	-87.5	272.5	0.460555
2005	10	20	-87.5	272.5	0.410419
2006	10	20	-87.5	272.5	0.443568
2007	10	20	-87.5	272.5	0.446487
2008	10	20	-87.5	272.5	0.483004
2009	10	20	-87.5	272.5	0.428537
2010	10	20	-87.5	272.5	0.377584
2011	10	20	-87.5	272.5	0.392175
2012	10	20	-87.5	272.5	0.354694
2013	10	20	-87.5	272.5	0.686574
2014	10	20	-87.5	272.5	0.4475
2015	10	20	-87.5	272.5	0.528796
2016	10	20	-87.5	272.5	0.357079
2000	11	20.25	-87.5	272.5	0.132758
2001	11	20.25	-87.5	272.5	0.134104
2002	11	20.25	-87.5	272.5	0.126076
2003	11	20.25	-87.5	272.5	0.128733
2004	11	20.25	-87.5	272.5	0.129449
2005	11	20.25	-87.5	272.5	0.129188
2006	11	20.25	-87.5	272.5	0.127806
2007	11	20.25	-87.5	272.5	0.132467
2008	11	20.25	-87.5	272.5	0.138051
2009	11	20.25	-87.5	272.5	0.125612
2010	11	20.25	-87.5	272.5	0.142683
2011	11	20.25	-87.5	272.5	0.12482
2012	11	20.25	-87.5	272.5	0.128733
2013	11	20.25	-87.5	272.5	0.151703
2014	11	20.25	-87.5	272.5	0.141692
2015	11	20.25	-87.5	272.5	0.138848
2016	11	20.25	-87.5	272.5	0.130083
2000	12	20.25	-87.25	272.75	0.12031
2001	12	20.25	-87.25	272.75	0.126622
2002	12	20.25	-87.25	272.75	0.117957
2003	12	20.25	-87.25	272.75	0.122492
2004	12	20.25	-87.25	272.75	0.122509
2005	12	20.25	-87.25	272.75	0.125335
2006	12	20.25	-87.25	272.75	0.120407
2007	12	20.25	-87.25	272.75	0.123309
2008	12	20.25	-87.25	272.75	0.128532
2009	12	20.25	-87.25	272.75	0.117298
2010	12	20.25	-87.25	272.75	0.133342
2011	12	20.25	-87.25	272.75	0.117259
2012	12	20.25	-87.25	272.75	0.120324
2013	12	20.25	-87.25	272.75	0.133069
2014	12	20.25	-87.25	272.75	0.129523
2015	12	20.25	-87.25	272.75	0.12465
2016	12	20.25	-87.25	272.75	0.12064
2000	13	20.25	-87	273	2.44641
2001	13	20.25	-87	273	1.87885
2002	13	20.25	-87	273	1.91788
2003	13	20.25	-87	273	1.91089
2004	13	20.25	-87	273	2.10954
2005	13	20.25	-87	273	1.75488
2006	13	20.25	-87	273	1.15034
2007	13	20.25	-87	273	1.60911
2008	13	20.25	-87	273	2.08667
2009	13	20.25	-87	273	1.76392
2010	13	20.25	-87	273	1.5014
2011	13	20.25	-87	273	1.68217
2012	13	20.25	-87	273	1.31224
2013	13	20.25	-87	273	2.01505
2014	13	20.25	-87	273	2.32367
2015	13	20.25	-87	273	1.59602
2016	13	20.25	-87	273	3.71468
2000	14	20.5	-87.25	272.75	0.118011
2001	14	20.5	-87.25	272.75	0.121829
2002	14	20.5	-87.25	272.75	0.112464
2003	14	20.5	-87.25	272.75	0.115248
2004	14	20.5	-87.25	272.75	0.118799
2005	14	20.5	-87.25	272.75	0.11977
2006	14	20.5	-87.25	272.75	0.117103
2007	14	20.5	-87.25	272.75	0.122781
2008	14	20.5	-87.25	272.75	0.123756
2009	14	20.5	-87.25	272.75	0.114533
2010	14	20.5	-87.25	272.75	0.134031
2011	14	20.5	-87.25	272.75	0.114189
2012	14	20.5	-87.25	272.75	0.118084
2013	14	20.5	-87.25	272.75	0.129169
2014	14	20.5	-87.25	272.75	0.126664
2015	14	20.5	-87.25	272.75	0.123238
2016	14	20.5	-87.25	272.75	0.113387
2000	15	20.5	-87	273	0.128915
2001	15	20.5	-87	273	0.145829
2002	15	20.5	-87	273	0.128427
2003	15	20.5	-87	273	0.160513
2004	15	20.5	-87	273	0.132896
2005	15	20.5	-87	273	0.167273
2006	15	20.5	-87	273	0.126107
2007	15	20.5	-87	273	0.128562
2008	15	20.5	-87	273	0.136006
2009	15	20.5	-87	273	0.125619
2010	15	20.5	-87	273	0.141037
2011	15	20.5	-87	273	0.145739
2012	15	20.5	-87	273	0.177907
2013	15	20.5	-87	273	0.149447
2014	15	20.5	-87	273	0.152087
2015	15	20.5	-87	273	0.172397
2016	15	20.5	-87	273	0.162975
2000	16	20.5	-86.75	273.25	0.121509
2001	16	20.5	-86.75	273.25	0.141446
2002	16	20.5	-86.75	273.25	0.124324
2003	16	20.5	-86.75	273.25	0.152134
2004	16	20.5	-86.75	273.25	0.130226
2005	16	20.5	-86.75	273.25	0.16004
2006	16	20.5	-86.75	273.25	0.123098
2007	16	20.5	-86.75	273.25	0.119274
2008	16	20.5	-86.75	273.25	0.130704
2009	16	20.5	-86.75	273.25	0.117585
2010	16	20.5	-86.75	273.25	0.133465
2011	16	20.5	-86.75	273.25	0.135318
2012	16	20.5	-86.75	273.25	0.164446
2013	16	20.5	-86.75	273.25	0.136303
2014	16	20.5	-86.75	273.25	0.144751
2015	16	20.5	-86.75	273.25	0.159784
2016	16	20.5	-86.75	273.25	0.156449
2000	18	20.75	-87	273	0.150528
2001	18	20.75	-87	273	0.166853
2002	18	20.75	-87	273	0.147452
2003	18	20.75	-87	273	0.19672
2004	18	20.75	-87	273	0.148409
2005	18	20.75	-87	273	0.207679
2006	18	20.75	-87	273	0.14591
2007	18	20.75	-87	273	0.145499
2008	18	20.75	-87	273	0.153822
2009	18	20.75	-87	273	0.143646
2010	18	20.75	-87	273	0.159862
2011	18	20.75	-87	273	0.172862
2012	18	20.75	-87	273	0.22047
2013	18	20.75	-87	273	0.177038
2014	18	20.75	-87	273	0.181717
2015	18	20.75	-87	273	0.219114
2016	18	20.75	-87	273	0.202883
2000	19	20.75	-84.75	275.25	0.0884767
2001	19	20.75	-84.75	275.25	0.117332
2002	19	20.75	-84.75	275.25	0.0980435
2003	19	20.75	-84.75	275.25	0.0968618
2004	19	20.75	-84.75	275.25	0.0977238
2005	19	20.75	-84.75	275.25	0.106643
2006	19	20.75	-84.75	275.25	0.0854302
2007	19	20.75	-84.75	275.25	0.0941389
2008	19	20.75	-84.75	275.25	0.0971007
2009	19	20.75	-84.75	275.25	0.0848442
2010	19	20.75	-84.75	275.25	0.0978097
2011	19	20.75	-84.75	275.25	0.0898923
2012	19	20.75	-84.75	275.25	0.0948234
2013	19	20.75	-84.75	275.25	0.08334
2014	19	20.75	-84.75	275.25	0.10718
2015	19	20.75	-84.75	275.25	0.0963435
2016	19	20.75	-84.75	275.25	0.105483
2000	20	21	-86.75	273.25	0.163733
2001	20	21	-86.75	273.25	0.157108
2002	20	21	-86.75	273.25	0.169552
2003	20	21	-86.75	273.25	0.173601
2004	20	21	-86.75	273.25	0.156083
2005	20	21	-86.75	273.25	0.16032
2006	20	21	-86.75	273.25	0.160535
2007	20	21	-86.75	273.25	0.149646
2008	20	21	-86.75	273.25	0.205572
2009	20	21	-86.75	273.25	0.148803
2010	20	21	-86.75	273.25	0.205148
2011	20	21	-86.75	273.25	0.147498
2012	20	21	-86.75	273.25	0.16211
2013	20	21	-86.75	273.25	0.163741
2014	20	21	-86.75	273.25	0.16956
2015	20	21	-86.75	273.25	0.188359
2016	20	21	-86.75	273.25	0.170573
2000	21	21.25	-86.75	273.25	0.462328
2001	21	21.25	-86.75	273.25	0.444199
2002	21	21.25	-86.75	273.25	0.511336
2003	21	21.25	-86.75	273.25	0.484874
2004	21	21.25	-86.75	273.25	0.415677
2005	21	21.25	-86.75	273.25	0.485019
2006	21	21.25	-86.75	273.25	0.441062
2007	21	21.25	-86.75	273.25	0.404302
2008	21	21.25	-86.75	273.25	0.528659
2009	21	21.25	-86.75	273.25	1.07106
2010	21	21.25	-86.75	273.25	0.543466
2011	21	21.25	-86.75	273.25	1.19115
2012	21	21.25	-86.75	273.25	0.429099
2013	21	21.25	-86.75	273.25	1.03575
2014	21	21.25	-86.75	273.25	0.598448
2015	21	21.25	-86.75	273.25	0.527818
2016	21	21.25	-86.75	273.25	0.417866
2000	22	21.5	-87.75	272.25	1.87822
2001	22	21.5	-87.75	272.25	1.88124
2002	22	21.5	-87.75	272.25	1.89685
2003	22	21.5	-87.75	272.25	1.66812
2004	22	21.5	-87.75	272.25	2.62758
2005	22	21.5	-87.75	272.25	1.71482
2006	22	21.5	-87.75	272.25	1.88015
2007	22	21.5	-87.75	272.25	2.52468
2008	22	21.5	-87.75	272.25	2.02344
2009	22	21.5	-87.75	272.25	2.18864
2010	22	21.5	-87.75	272.25	1.63456
2011	22	21.5	-87.75	272.25	4.32216
2012	22	21.5	-87.75	272.25	1.91343
2013	22	21.5	-87.75	272.25	1.94408
2014	22	21.5	-87.75	272.25	1.79039
2015	22	21.5	-87.75	272.25	2.19074
2016	22	21.5	-87.75	272.25	1.65375
2000	23	21.5	-86.75	273.25	0.712481
2001	23	21.5	-86.75	273.25	0.785098
2002	23	21.5	-86.75	273.25	0.797454
2003	23	21.5	-86.75	273.25	0.823007
2004	23	21.5	-86.75	273.25	0.89639
2005	23	21.5	-86.75	273.25	0.758553
2006	23	21.5	-86.75	273.25	0.824572
2007	23	21.5	-86.75	273.25	0.803551
2008	23	21.5	-86.75	273.25	0.909865
2009	23	21.5	-86.75	273.25	1.25458
2010	23	21.5	-86.75	273.25	0.947268
2011	23	21.5	-86.75	273.25	1.51287
2012	23	21.5	-86.75	273.25	0.732025
2013	23	21.5	-86.75	273.25	1.14314
2014	23	21.5	-86.75	273.25	0.806267
2015	23	21.5	-86.75	273.25	0.938539
2016	23	21.5	-86.75	273.25	0.673267

## Sheet: Hoja2
Sites	Year	Latitude	Longitude	Longitude 2	Chl a [mg m-3]
1	2000	18.25	-87.75	272.25	2.25401
1	2001	18.25	-87.75	272.25	0.997141
1	2002	18.25	-87.75	272.25	0.378586
1	2003	18.25	-87.75	272.25	0.419618
1	2004	18.25	-87.75	272.25	0.959309
1	2005	18.25	-87.75	272.25	1.87497
1	2006	18.25	-87.75	272.25	1.34112
1	2007	18.25	-87.75	272.25	1.72532
1	2008	18.25	-87.75	272.25	1.51604
1	2009	18.25	-87.75	272.25	0.88765
1	2010	18.25	-87.75	272.25	1.16825
1	2011	18.25	-87.75	272.25	1.55761
1	2012	18.25	-87.75	272.25	1.1556
1	2013	18.25	-87.75	272.25	1.78018
1	2014	18.25	-87.75	272.25	0.738102
1	2015	18.25	-87.75	272.25	0.852714
1	2016	18.25	-87.75	272.25	0.835658
2	2000	18.5	-87.75	272.25	1.52945
2	2001	18.5	-87.75	272.25	0.815428
2	2002	18.5	-87.75	272.25	0.361528
2	2003	18.5	-87.75	272.25	0.35603
2	2004	18.5	-87.75	272.25	0.805651
2	2005	18.5	-87.75	272.25	1.31206
2	2006	18.5	-87.75	272.25	1.09912
2	2007	18.5	-87.75	272.25	1.46016
2	2008	18.5	-87.75	272.25	0.918759
2	2009	18.5	-87.75	272.25	0.727768
2	2010	18.5	-87.75	272.25	0.993368
2	2011	18.5	-87.75	272.25	1.49847
2	2012	18.5	-87.75	272.25	0.930249
2	2013	18.5	-87.75	272.25	1.35276
2	2014	18.5	-87.75	272.25	0.552952
2	2015	18.5	-87.75	272.25	0.703378
2	2016	18.5	-87.75	272.25	0.666219
3	2000	18.75	-87.75	272.25	0.178866
3	2001	18.75	-87.75	272.25	0.186838
3	2002	18.75	-87.75	272.25	0.19401
3	2003	18.75	-87.75	272.25	0.190557
3	2004	18.75	-87.75	272.25	0.250574
3	2005	18.75	-87.75	272.25	0.180234
3	2006	18.75	-87.75	272.25	0.202604
3	2007	18.75	-87.75	272.25	0.226269
3	2008	18.75	-87.75	272.25	0.25541
3	2009	18.75	-87.75	272.25	0.208132
3	2010	18.75	-87.75	272.25	0.267118
3	2011	18.75	-87.75	272.25	0.222011
3	2012	18.75	-87.75	272.25	0.200086
3	2013	18.75	-87.75	272.25	0.259596
3	2014	18.75	-87.75	272.25	0.24016
3	2015	18.75	-87.75	272.25	0.246001
3	2016	18.75	-87.75	272.25	0.230598
4	2000	18.75	-87.5	272.5	0.178866
4	2001	18.75	-87.5	272.5	0.186838
4	2002	18.75	-87.5	272.5	0.19401
4	2003	18.75	-87.5	272.5	0.190557
4	2004	18.75	-87.5	272.5	0.250574
4	2005	18.75	-87.5	272.5	0.180234
4	2006	18.75	-87.5	272.5	0.202604
4	2007	18.75	-87.5	272.5	0.226269
4	2008	18.75	-87.5	272.5	0.25541
4	2009	18.75	-87.5	272.5	0.208132
4	2010	18.75	-87.5	272.5	0.267118
4	2011	18.75	-87.5	272.5	0.222011
4	2012	18.75	-87.5	272.5	0.200086
4	2013	18.75	-87.5	272.5	0.259596
4	2014	18.75	-87.5	272.5	0.24016
4	2015	18.75	-87.5	272.5	0.246001
4	2016	18.75	-87.5	272.5	0.230598
5	2000	19	-87.75	272.25	0.123399
5	2001	19	-87.75	272.25	0.133396
5	2002	19	-87.75	272.25	0.123067
5	2003	19	-87.75	272.25	0.128913
5	2004	19	-87.75	272.25	0.121334
5	2005	19	-87.75	272.25	0.132447
5	2006	19	-87.75	272.25	0.119269
5	2007	19	-87.75	272.25	0.12917
5	2008	19	-87.75	272.25	0.144425
5	2009	19	-87.75	272.25	0.11914
5	2010	19	-87.75	272.25	0.13235
5	2011	19	-87.75	272.25	0.120046
5	2012	19	-87.75	272.25	0.125669
5	2013	19	-87.75	272.25	0.137229
5	2014	19	-87.75	272.25	0.132171
5	2015	19	-87.75	272.25	0.119573
5	2016	19	-87.75	272.25	0.12853
6	2000	19.25	-87.5	272.5	1.84985
6	2001	19.25	-87.5	272.5	1.23913
6	2002	19.25	-87.5	272.5	0.965378
6	2003	19.25	-87.5	272.5	0.742186
6	2004	19.25	-87.5	272.5	0.705655
6	2005	19.25	-87.5	272.5	0.73932
6	2006	19.25	-87.5	272.5	0.56356
6	2007	19.25	-87.5	272.5	1.69491
6	2008	19.25	-87.5	272.5	1.97404
6	2009	19.25	-87.5	272.5	0.674922
6	2010	19.25	-87.5	272.5	1.03848
6	2011	19.25	-87.5	272.5	0.950675
6	2012	19.25	-87.5	272.5	0.660371
6	2013	19.25	-87.5	272.5	1.93226
6	2014	19.25	-87.5	272.5	1.35824
6	2015	19.25	-87.5	272.5	1.46198
6	2016	19.25	-87.5	272.5	1.0204
7	2000	19.25	-87	273	0.101508
7	2001	19.25	-87	273	0.113704
7	2002	19.25	-87	273	0.101558
7	2003	19.25	-87	273	0.111317
7	2004	19.25	-87	273	0.109886
7	2005	19.25	-87	273	0.117557
7	2006	19.25	-87	273	0.100698
7	2007	19.25	-87	273	0.107526
7	2008	19.25	-87	273	0.112199
7	2009	19.25	-87	273	0.0979304
7	2010	19.25	-87	273	0.111871
7	2011	19.25	-87	273	0.0997613
7	2012	19.25	-87	273	0.104508
7	2013	19.25	-87	273	0.111884
7	2014	19.25	-87	273	0.113879
7	2015	19.25	-87	273	0.111878
7	2016	19.25	-87	273	0.104753
8	2000	19.5	-87.5	272.5	2.84768
8	2001	19.5	-87.5	272.5	1.97645
8	2002	19.5	-87.5	272.5	1.77368
8	2003	19.5	-87.5	272.5	1.62891
8	2004	19.5	-87.5	272.5	1.335
8	2005	19.5	-87.5	272.5	1.61863
8	2006	19.5	-87.5	272.5	1.29351
8	2007	19.5	-87.5	272.5	2.86037
8	2008	19.5	-87.5	272.5	3.52827
8	2009	19.5	-87.5	272.5	1.36484
8	2010	19.5	-87.5	272.5	1.70391
8	2011	19.5	-87.5	272.5	1.68118
8	2012	19.5	-87.5	272.5	1.47929
8	2013	19.5	-87.5	272.5	3.83201
8	2014	19.5	-87.5	272.5	2.57597
8	2015	19.5	-87.5	272.5	2.24092
8	2016	19.5	-87.5	272.5	1.58857
9	2000	19.75	-87.5	272.5	1.67826
9	2001	19.75	-87.5	272.5	1.28464
9	2002	19.75	-87.5	272.5	1.44599
9	2003	19.75	-87.5	272.5	1.29701
9	2004	19.75	-87.5	272.5	1.115
9	2005	19.75	-87.5	272.5	1.3513
9	2006	19.75	-87.5	272.5	1.15602
9	2007	19.75	-87.5	272.5	1.73277
9	2008	19.75	-87.5	272.5	2.22842
9	2009	19.75	-87.5	272.5	1.13959
9	2010	19.75	-87.5	272.5	1.11332
9	2011	19.75	-87.5	272.5	1.19158
9	2012	19.75	-87.5	272.5	1.21321
9	2013	19.75	-87.5	272.5	2.78647
9	2014	19.75	-87.5	272.5	1.77195
9	2015	19.75	-87.5	272.5	1.43313
9	2016	19.75	-87.5	272.5	0.990289
10	2000	20	-87.5	272.5	0.538929
10	2001	20	-87.5	272.5	0.519146
10	2002	20	-87.5	272.5	0.654189
10	2003	20	-87.5	272.5	0.40054
10	2004	20	-87.5	272.5	0.460555
10	2005	20	-87.5	272.5	0.410419
10	2006	20	-87.5	272.5	0.443568
10	2007	20	-87.5	272.5	0.446487
10	2008	20	-87.5	272.5	0.483004
10	2009	20	-87.5	272.5	0.428537
10	2010	20	-87.5	272.5	0.377584
10	2011	20	-87.5	272.5	0.392175
10	2012	20	-87.5	272.5	0.354694
10	2013	20	-87.5	272.5	0.686574
10	2014	20	-87.5	272.5	0.4475
10	2015	20	-87.5	272.5	0.528796
10	2016	20	-87.5	272.5	0.357079
11	2000	20.25	-87.5	272.5	0.132758
11	2001	20.25	-87.5	272.5	0.134104
11	2002	20.25	-87.5	272.5	0.126076
11	2003	20.25	-87.5	272.5	0.128733
11	2004	20.25	-87.5	272.5	0.129449
11	2005	20.25	-87.5	272.5	0.129188
11	2006	20.25	-87.5	272.5	0.127806
11	2007	20.25	-87.5	272.5	0.132467
11	2008	20.25	-87.5	272.5	0.138051
11	2009	20.25	-87.5	272.5	0.125612
11	2010	20.25	-87.5	272.5	0.142683
11	2011	20.25	-87.5	272.5	0.12482
11	2012	20.25	-87.5	272.5	0.128733
11	2013	20.25	-87.5	272.5	0.151703
11	2014	20.25	-87.5	272.5	0.141692
11	2015	20.25	-87.5	272.5	0.138848
11	2016	20.25	-87.5	272.5	0.130083
12	2000	20.25	-87.25	272.75	0.12031
12	2001	20.25	-87.25	272.75	0.126622
12	2002	20.25	-87.25	272.75	0.117957
12	2003	20.25	-87.25	272.75	0.122492
12	2004	20.25	-87.25	272.75	0.122509
12	2005	20.25	-87.25	272.75	0.125335
12	2006	20.25	-87.25	272.75	0.120407
12	2007	20.25	-87.25	272.75	0.123309
12	2008	20.25	-87.25	272.75	0.128532
12	2009	20.25	-87.25	272.75	0.117298
12	2010	20.25	-87.25	272.75	0.133342
12	2011	20.25	-87.25	272.75	0.117259
12	2012	20.25	-87.25	272.75	0.120324
12	2013	20.25	-87.25	272.75	0.133069
12	2014	20.25	-87.25	272.75	0.129523
12	2015	20.25	-87.25	272.75	0.12465
12	2016	20.25	-87.25	272.75	0.12064
13	2000	20.25	-87	273	2.44641
13	2001	20.25	-87	273	1.87885
13	2002	20.25	-87	273	1.91788
13	2003	20.25	-87	273	1.91089
13	2004	20.25	-87	273	2.10954
13	2005	20.25	-87	273	1.75488
13	2006	20.25	-87	273	1.15034
13	2007	20.25	-87	273	1.60911
13	2008	20.25	-87	273	2.08667
13	2009	20.25	-87	273	1.76392
13	2010	20.25	-87	273	1.5014
13	2011	20.25	-87	273	1.68217
13	2012	20.25	-87	273	1.31224
13	2013	20.25	-87	273	2.01505
13	2014	20.25	-87	273	2.32367
13	2015	20.25	-87	273	1.59602
13	2016	20.25	-87	273	3.71468
14	2000	20.5	-87.25	272.75	0.118011
14	2001	20.5	-87.25	272.75	0.121829
14	2002	20.5	-87.25	272.75	0.112464
14	2003	20.5	-87.25	272.75	0.115248
14	2004	20.5	-87.25	272.75	0.118799
14	2005	20.5	-87.25	272.75	0.11977
14	2006	20.5	-87.25	272.75	0.117103
14	2007	20.5	-87.25	272.75	0.122781
14	2008	20.5	-87.25	272.75	0.123756
14	2009	20.5	-87.25	272.75	0.114533
14	2010	20.5	-87.25	272.75	0.134031
14	2011	20.5	-87.25	272.75	0.114189
14	2012	20.5	-87.25	272.75	0.118084
14	2013	20.5	-87.25	272.75	0.129169
14	2014	20.5	-87.25	272.75	0.126664
14	2015	20.5	-87.25	272.75	0.123238
14	2016	20.5	-87.25	272.75	0.113387
15	2000	20.5	-87	273	0.128915
15	2001	20.5	-87	273	0.145829
15	2002	20.5	-87	273	0.128427
15	2003	20.5	-87	273	0.160513
15	2004	20.5	-87	273	0.132896
15	2005	20.5	-87	273	0.167273
15	2006	20.5	-87	273	0.126107
15	2007	20.5	-87	273	0.128562
15	2008	20.5	-87	273	0.136006
15	2009	20.5	-87	273	0.125619
15	2010	20.5	-87	273	0.141037
15	2011	20.5	-87	273	0.145739
15	2012	20.5	-87	273	0.177907
15	2013	20.5	-87	273	0.149447
15	2014	20.5	-87	273	0.152087
15	2015	20.5	-87	273	0.172397
15	2016	20.5	-87	273	0.162975
16	2000	20.5	-86.75	273.25	0.121509
16	2001	20.5	-86.75	273.25	0.141446
16	2002	20.5	-86.75	273.25	0.124324
16	2003	20.5	-86.75	273.25	0.152134
16	2004	20.5	-86.75	273.25	0.130226
16	2005	20.5	-86.75	273.25	0.16004
16	2006	20.5	-86.75	273.25	0.123098
16	2007	20.5	-86.75	273.25	0.119274
16	2008	20.5	-86.75	273.25	0.130704
16	2009	20.5	-86.75	273.25	0.117585
16	2010	20.5	-86.75	273.25	0.133465
16	2011	20.5	-86.75	273.25	0.135318
16	2012	20.5	-86.75	273.25	0.164446
16	2013	20.5	-86.75	273.25	0.136303
16	2014	20.5	-86.75	273.25	0.144751
16	2015	20.5	-86.75	273.25	0.159784
16	2016	20.5	-86.75	273.25	0.156449
17	2000	20.75	-87.5	272.5
17	2001	20.75	-87.5	272.5
17	2002	20.75	-87.5	272.5
17	2003	20.75	-87.5	272.5
17	2004	20.75	-87.5	272.5
17	2005	20.75	-87.5	272.5
17	2006	20.75	-87.5	272.5
17	2007	20.75	-87.5	272.5
17	2008	20.75	-87.5	272.5
17	2009	20.75	-87.5	272.5
17	2010	20.75	-87.5	272.5
17	2011	20.75	-87.5	272.5
17	2012	20.75	-87.5	272.5
17	2013	20.75	-87.5	272.5
17	2014	20.75	-87.5	272.5
17	2015	20.75	-87.5	272.5
17	2016	20.75	-87.5	272.5
18	2000	20.75	-87	273	0.150528
18	2001	20.75	-87	273	0.166853
18	2002	20.75	-87	273	0.147452
18	2003	20.75	-87	273	0.19672
18	2004	20.75	-87	273	0.148409
18	2005	20.75	-87	273	0.207679
18	2006	20.75	-87	273	0.14591
18	2007	20.75	-87	273	0.145499
18	2008	20.75	-87	273	0.153822
18	2009	20.75	-87	273	0.143646
18	2010	20.75	-87	273	0.159862
18	2011	20.75	-87	273	0.172862
18	2012	20.75	-87	273	0.22047
18	2013	20.75	-87	273	0.177038
18	2014	20.75	-87	273	0.181717
18	2015	20.75	-87	273	0.219114
18	2016	20.75	-87	273	0.202883
19	2000	20.75	-84.75	275.25	0.0884767
19	2001	20.75	-84.75	275.25	0.117332
19	2002	20.75	-84.75	275.25	0.0980435
19	2003	20.75	-84.75	275.25	0.0968618
19	2004	20.75	-84.75	275.25	0.0977238
19	2005	20.75	-84.75	275.25	0.106643
19	2006	20.75	-84.75	275.25	0.0854302
19	2007	20.75	-84.75	275.25	0.0941389
19	2008	20.75	-84.75	275.25	0.0971007
19	2009	20.75	-84.75	275.25	0.0848442
19	2010	20.75	-84.75	275.25	0.0978097
19	2011	20.75	-84.75	275.25	0.0898923
19	2012	20.75	-84.75	275.25	0.0948234
19	2013	20.75	-84.75	275.25	0.08334
19	2014	20.75	-84.75	275.25	0.10718
19	2015	20.75	-84.75	275.25	0.0963435
19	2016	20.75	-84.75	275.25	0.105483
20	2000	21	-86.75	273.25	0.163733
20	2001	21	-86.75	273.25	0.157108
20	2002	21	-86.75	273.25	0.169552
20	2003	21	-86.75	273.25	0.173601
20	2004	21	-86.75	273.25	0.156083
20	2005	21	-86.75	273.25	0.16032
20	2006	21	-86.75	273.25	0.160535
20	2007	21	-86.75	273.25	0.149646
20	2008	21	-86.75	273.25	0.205572
20	2009	21	-86.75	273.25	0.148803
20	2010	21	-86.75	273.25	0.205148
20	2011	21	-86.75	273.25	0.147498
20	2012	21	-86.75	273.25	0.16211
20	2013	21	-86.75	273.25	0.163741
20	2014	21	-86.75	273.25	0.16956
20	2015	21	-86.75	273.25	0.188359
20	2016	21	-86.75	273.25	0.170573
21	2000	21.25	-86.75	273.25	0.462328
21	2001	21.25	-86.75	273.25	0.444199
21	2002	21.25	-86.75	273.25	0.511336
21	2003	21.25	-86.75	273.25	0.484874
21	2004	21.25	-86.75	273.25	0.415677
21	2005	21.25	-86.75	273.25	0.485019
21	2006	21.25	-86.75	273.25	0.441062
21	2007	21.25	-86.75	273.25	0.404302
21	2008	21.25	-86.75	273.25	0.528659
21	2009	21.25	-86.75	273.25	1.07106
21	2010	21.25	-86.75	273.25	0.543466
21	2011	21.25	-86.75	273.25	1.19115
21	2012	21.25	-86.75	273.25	0.429099
21	2013	21.25	-86.75	273.25	1.03575
21	2014	21.25	-86.75	273.25	0.598448
21	2015	21.25	-86.75	273.25	0.527818
21	2016	21.25	-86.75	273.25	0.417866
22	2000	21.5	-87.75	272.25	1.87822
22	2001	21.5	-87.75	272.25	1.88124
22	2002	21.5	-87.75	272.25	1.89685
22	2003	21.5	-87.75	272.25	1.66812
22	2004	21.5	-87.75	272.25	2.62758
22	2005	21.5	-87.75	272.25	1.71482
22	2006	21.5	-87.75	272.25	1.88015
22	2007	21.5	-87.75	272.25	2.52468
22	2008	21.5	-87.75	272.25	2.02344
22	2009	21.5	-87.75	272.25	2.18864
22	2010	21.5	-87.75	272.25	1.63456
22	2011	21.5	-87.75	272.25	4.32216
22	2012	21.5	-87.75	272.25	1.91343
22	2013	21.5	-87.75	272.25	1.94408
22	2014	21.5	-87.75	272.25	1.79039
22	2015	21.5	-87.75	272.25	2.19074
22	2016	21.5	-87.75	272.25	1.65375
23	2000	21.5	-86.75	273.25	0.712481
23	2001	21.5	-86.75	273.25	0.785098
23	2002	21.5	-86.75	273.25	0.797454
23	2003	21.5	-86.75	273.25	0.823007
23	2004	21.5	-86.75	273.25	0.89639
23	2005	21.5	-86.75	273.25	0.758553
23	2006	21.5	-86.75	273.25	0.824572
23	2007	21.5	-86.75	273.25	0.803551
23	2008	21.5	-86.75	273.25	0.909865
23	2009	21.5	-86.75	273.25	1.25458
23	2010	21.5	-86.75	273.25	0.947268
23	2011	21.5	-86.75	273.25	1.51287
23	2012	21.5	-86.75	273.25	0.732025
23	2013	21.5	-86.75	273.25	1.14314
23	2014	21.5	-86.75	273.25	0.806267
23	2015	21.5	-86.75	273.25	0.938539
23	2016	21.5	-86.75	273.25	0.673267
