# Supplementary material
Source: MDPI journal article supplement (https://www.mdpi.com/1424-2818/12/9/338)
Supplement: s1 [file s1 › Supplementary material/S8_cc_meta-analysis_input.xlsx]

## Sheet: Hoja1
Site.ID	Name	Name.Algae	Longitude	Latitude	Latitude.used	Longitude.used	Longitude.chl	Region	Protocol	Source	Monitoring.entity	source.type	Temperature.rate	Temperature2016	Chl.rate	Chl.rate.spec	Distance.shore	Depth	Population.average	Population.rate	Population2010	Initial.cover	intercept	intercept.se	slope	slope.se	p.value	Adjusted R2
XE02	Bonanza	Bonanza	-86.8141	20.9642	21	273.25	-86.75	Northern.QRoo	Otros	PNAPM-CONANP.SF	PNAPM-CONANP	report	0.02466	28.2755	0.0009641	0.0005066	1675.63	0.75	0	0	0	23	1029.72	454.629	-0.5082	0.226	0.0284	0.06534
XE03	CardonaMERASomero	CardonaMERASomero	-87.0195	20.4078	20.5	273	-87	Cozumel	SAM	MERA.PNAC	PNAC	monitoring	0.02885	28.4093	0.002667	-0.0002377	325.37	5.2	4.4	1.19298	136	26	-683.236	1217.02	0.3468	0.6051	0.574	-0.04112
XE04	Chankanaab	Chankanaab	-87.0023	20.44	20.5	273	-87	Cozumel	AGRRA.V5	CONACYT.247104	CONACYT	monitoring	0.02885	28.4093	0.002667	-7.38e-05	375.18	12	1171.4	1.0819	77372	16.1	-1733.56	428.572	0.8708	0.2132	7.21e-05	0.09523
XE05	ChankanaabBolonesMERAProfundo	ChankanaabBolonesMERAProfundo	-87.0051	20.4401	20.5	273	-87	Cozumel	SAM	MERA.PNAC	PNAC	monitoring	0.02885	28.4093	0.002667	-7.38e-05	528.22	18.48	1171.4	1.0819	77372	6.3	-217.165	1050.77	0.1117	0.5225	0.834	-0.06343
XE06	Colombia	Colombia	-87.0272	20.3243	20.25	273	-87	Cozumel	AGRRA.V5	CONACYT.247104	CONACYT	monitoring	0.008671	28.1985	0.10153	-0.0007512	1467.88	12.3	-3.6	0.454545	15	19.2	-3635.44	569.153	1.8213	0.2832	2.21e-09	0.2355
XE07	ColombiaMERASomero	ColombiaMERASomero	-87.0244	20.3205	20.25	273	-87	Cozumel	SAM	MERA.PNAC	PNAC	monitoring	0.008671	28.1985	0.10153	-0.0009566	1262.87	6.5	-3.6	0.454545	15	20.7	-3651.44	1790.56	1.8281	0.8902	0.0567	0.1591
XE08	Cuevones	Cuevones	-86.742	21.1617	21.25	273.25	-86.75	Northern.QRoo	AGRRA.V4	CONACYT.247104	Paper	paper	0.03152	28.0733	0.0009472	-0.006369	1262.87	8.54191	20620	1.19169	640948	3.3	-4120.16	1432.69	2.05	0.7114	0.0181	0.4221
XE09	Dalila	Dalila	-87.0291	20.3488	21.25	273.25	-86.75	Cozumel	AGRRA.V5	CONACYT.247104	CONACYT	monitoring	0.03152	28.0733	0.0009472	-0.0004525	766.91	12	-3.6	0.454545	15	18	-3115.34	554.286	1.5601	0.2758	1.6e-05	0.1792
XE10	DzulHaMERASomero	DzulHaMERASomero	-86.9871	20.4588	20.5	273	-87	Cozumel	SAM	MERA.PNAC	PNAC	monitoring	0.02885	28.4093	0.002667	8.147e-06	100.11	3	1264.2	1.08804	78118	0.7	-2418.57	546.624	1.214	0.272	1.6e-05	0.1133
XE11	HananII	HananII	-86.761	20.499	20.5	273.25	-86.75	Cozumel	AGRRA.V5	CONACYT.247104	CONACYT	monitoring	0.03113	28.4169	0.002236	0.0007292	732.26	8	0	0	0	11.9	128.706	455.536	-0.05734	0.22648	0.804	-0.07164
XE12	Islote	Islote	-87.0023	20.2703	20.25	273	-87	Cozumel	SAM	Monitoreo.PNAC	PNAC - Monitoring	monitoring	0.008671	28.1985	0.10153	-0.0008478	1131.49	15	0	0	0	9.1	-765.556	2023.46	0.3869	1.0084	0.706	-0.05281
XE13	Jardines	Jardines	-86.8802	20.8314	20.75	273	-87	Northern.QRoo	Otros	PNAPM-CONANP.SF	PNAPM-CONANP	report	0.02851	28.3671	0.004263	-0.0004865	837.62	2.4	1619.8	8.38286	9196	21	2165.07	807.948	-1.069	0.4014	0.0108	0.01085
XE14	LaBocana	LaBocana	-86.8411	20.8864	20.75	275.25	-84.75	Northern.QRoo	Otros	CARICOMP.2004	CARICOMO	monitoring	0.02636	28.4532	0.0004544	0.001497	1453.59	3.7	1618.2	8.37557	9188	4.7	-2439.85	1031.95	1.2204	0.5127	0.0219	0.0979
XE15	LaPared	LaPared	-86.8762	20.8242	20.75	273	-87	Northern.QRoo	AGRRA.MODIFICADO	Msthesis.MOG	Paper	thesis	0.02851	28.3671	0.004263	-0.0004865	1652.04	4.3	1619.8	8.38286	9196	10.38	13	793.1	-0.0008021	0.394	0.998	-0.02564
XE16	Limones	Limones	-86.7972	20.9885	21	273.25	-86.75	Northern.QRoo	Otros	PNAPM-CONANP.SF	PNAPM	report	0.03015	28.2755	0.0009641	0.003471	2883.76	3	0	0	0	15.4	-5408.99	1459.81	2.6997	0.7253	0.000528	0.2112
XE17	Mah01	Mah01	-87.7164	18.6626	18.75	272.25	-87.75	Southern.QRoo	AGRRA.V5	HRI	HRI	monitoring	0.02035	28.4447	0.003474	-0.0004339	1076.36	11.4	127.6	3.26241	920	11.2	-96.1212	1616.36	0.05303	0.80236	0.948	-0.04525
XE19	MX1008	MX1008	-87.4606	20.057	20	272.5	-87.5	Central.QRoo	AGRRA.V4	HRI	HRI	monitoring	0.02628	28.3903	0.003491	0.002147	1689.87	18.2	-0.2	0.9	9	22.4	-939.969	1045.21	0.4798	0.5194	0.367	-0.007039
XE20	MX1017	MX1017	-86.7298	21.1706	21.25	273.25	-86.75	Northern.QRoo	AGRRA.V4	HRI	HRI	monitoring	0.03152	28.0733	0.0009472	0.006697	3874.1	11.07	20620	1.19169	640948	10.5	-557.737	577.2	0.2828	0.287	0.333	-0.00107
XE21	MX1020	MX1020	-87.7177	18.6497	18.75	272.25	-87.75	Southern.QRoo	AGRRA.V4	HRI	HRI	monitoring	0.02688	28.4447	0.003474	-0.000127	925.11	12.4	127.6	3.26241	920	3.2	-3095.98	847.631	1.545	0.4209	0.0011	0.316
XE22	MX1042	MX1042	-87.4579	20.1153	20	272.5	-87.5	Central.QRoo	AGRRA.V4	HRI	HRI	monitoring	0.02628	28.3903	0.003491	0.001574	958.37	9.5	688.6	1.23279	18233	7.4	210.141	1370.54	-0.09861	0.68106	0.886	-0.0489
XE23	MX1043	MX1043	-87.3854	20.2586	20.25	272.5	-87.5	Northern.QRoo	AGRRA.V4	HRI	HRI	monitoring	0.02641	28.3968	0.0008166	0.000774	950.65	9.1	707.4	1.23799	18399	5.8	-1038.38	1217.8	0.5232	0.6054	0.395	-0.009471
XE24	MX1048	MX1048	-87.0282	20.3584	20.3584	20.5	273	Cozumel	AGRRA.V4	HRI	HRI	monitoring	0.02885	28.4093	0.002667	0.000774	351.67	11.69	-3.6	0.454545	15	11.2	-1020.01	830.83	0.5128	0.413	0.226	0.02122
XE25	MX1050	MX1050	-87.1645	20.5363	20.5	272.75	-87.25	Northern.QRoo	AGRRA.V4	HRI	HRI	monitoring	0.02793	28.4091	0.0001051	0.0009921	244.87	12.4	715	2.18377	6595	4.3	-1782.62	591.419	0.8909	0.2939	0.00687	0.2905
XE26	MX1053	MX1053	-86.9707	20.4862	20.5	273	-87	Cozumel	AGRRA.V4	HRI	HRI	monitoring	0.02885	28.4093	0.002667	-0.0005671	91.06	6.3	1175	1.08219	77357	8.8	1077.37	608.147	-0.5325	0.3023	0.09	0.07222
XE27	MX1055	MX1055	-87.1061	20.5842	20.5	273	-87	Northern.QRoo	AGRRA.V4	HRI	HRI	monitoring	0.02885	28.4093	0.002667	0.0002319	91.06	7.3	9910	1.49357	149941	3.4	-736.724	433.701	0.3687	0.2156	0.102	0.08047
XE28	MX1057	MX1057	-87.0535	20.6406	20.75	273	-87	Northern.QRoo	AGRRA.V4	HRI	HRI	monitoring	0.02851	28.3671	0.004263	0.0002601	319.79	2.4	9920	1.49384	150038	1.3	-922.176	851.745	0.4619	0.4233	0.288	0.009005
XE29	MX1065	MX1065	-87.7907	18.3531	18.25	272.25	-87.75	Southern.QRoo	AGRRA.V4	HRI	HRI	monitoring	0.02035	28.2088	-0.07072	0.0001125	1085.01	13.7	24.6	1.4881	375	7	-696.761	854.347	0.352	0.4245	0.413	-0.009853
XE30	MX1116	MX1116	-87.1492	20.551	20.5	272.75	-87.25	Northern.QRoo	AGRRA.V4	HRI	HRI	monitoring	0.02793	28.3968	0.0001051	0.0002827	260.77	3.1	800.6	3.00451	6000	5.2	900.086	738.914	-0.4452	0.3672	0.241	0.02413
XE31	MX1117	MX1117	-87.4191	20.218	20.25	272.5	-87.5	Northern.QRoo	AGRRA.V4	HRI	HRI	monitoring	0.02641	28.3968	0.0008166	0.0012702	827.21	3.2	696	1.23415	18342	7.9	-251.412	1320.11	0.1312	0.6562	0.843	-0.03993
XE32	MX1131	MX1131	-86.8288	20.9163	21	273.25	-86.75	Northern.QRoo	AGRRA.V4	HRI	HRI	monitoring	0.02466	28.2755	0.0009641	-0.0006563	827.21	4.8	1618.2	8.37557	9188	14.3	-3428.86	1834.61	1.7167	0.9114	0.0822	0.154
XE33	MX1132	MX1132	-86.7964	20.9873	21	273.25	-86.75	Northern.QRoo	AGRRA.V4	HRI	HRI	monitoring	0.02466	28.2755	0.0009641	0.003471	3001.39	1.9	0	0	0	19.6	-3970.21	2307.23	1.987	1.147	0.0951	0.06898
XE34	MX1133	MX1133	-86.7405	21.1334	21.25	273.25	-86.75	Northern.QRoo	AGRRA.V4	HRI	HRI	monitoring	0.03152	28.0733	0.0009472	0.007517	67.31	3	20620	1.19169	640948	0.8	-135.34	255.1	0.06825	0.12682	0.595	-0.02809
XE35	MX1136	MX1136	-87.7984	18.3497	18.25	272.25	-87.75	Southern.QRoo	AGRRA.V4	HRI	HRI	monitoring	0.02035	28.2088	-0.07072	0.0001125	530.94	1.9	24.6	1.4881	375	3	106.204	531.556	-0.04971	-0.04971	0.26423	0.853
XE36	MX2067	MX2067	-87.767	18.4002	18.5	272.25	-87.75	Southern.QRoo	AGRRA.V4	HRI	HRI	monitoring	0.02272	28.4262	-0.04802	0.0008499	391.17	10.8	0	0	0	6.8	-1545.53	1037.14	0.7758	0.5155	0.144	0.04474
XE37	MX3009	MX3009	-86.9999	20.2723	20.25	273	-87	Cozumel	AGRRA.V4	HRI	HRI	monitoring	0.008671	28.1985	0.10153	-0.0008478	668.41	7.2	0	0	0	10.8	-1406.47	676.438	0.7051	0.3362	0.0472	0.124
XE38	MX3054	MX3054	-86.7526	20.5112	20.5	273.25	-86.75	Cozumel	AGRRA.V4	HRI	HRI	monitoring	0.03113	28.4169	0.002236	0.0007292	33499	10.6	0	0	0	11.7	-725.332	893.874	0.3679	0.4442	0.425	-0.02686
XE39	MXXCK01	MXXCK01	-87.8274	18.2137	18.25	272.25	-87.75	Southern.QRoo	AGRRA.V5	HRI	HRI	monitoring	0.02035	28.2088	-0.07072	0.004917	1571.22	10.3	24.6	1.4881	375	17.3	-2834.61	2008.9	1.4167	0.9975	0.175	0.05645
XE40	MXXCK02	MXXCK02	-87.8262	18.2401	18.25	272.25	-87.75	Southern.QRoo	AGRRA.V5	HRI	HRI	monitoring	0.02035	28.2088	-0.07072	-8.004e-05	1559.4	7.7	24.6	1.4881	375	20.8	689.611	2477.62	-0.3333	1.2302	0.79	-0.05765
XE41	PalancarJardinesMERASomero	PalancarJardinesMERASomero	-87.0262	20.3318	20.25	273	-87	Cozumel	SAM	MERA.PNAC	PNAC	monitoring	0.008671	28.1985	0.10153	-0.0009566	919.24	5.6	-3.6	0.454545	15	11.8	-4597.68	2243.46	2.295	1.115	0.0563	0.1599
XE42	Paraiso	Paraiso	-86.983	20.4693	20.5	273	-87	Cozumel	AGRRA.V5	CONACYT.247104	CONACYT	monitoring	0.02885	28.4093	0.002667	9.009e-05	176.64	9.6	1267.8	1.08833	78103	15.3	-423.902	454.308	0.2183	0.2261	0.336	-0.0004526
XE43	ParaisoMERASomero	ParaisoMERASomero	-86.9815	20.4694	20.5	273	-87	Cozumel	SAM	MERA.PNAC	PNAC	monitoring	0.02885	28.4093	0.002667	9.009e-05	21.76	4	1267.8	1.08833	78103	4.4	931.55	736.505	-0.4605	0.3662	0.227	0.03309
XE44	PasodelCedral	PasodelCedral	-87.0289	20.3739	20.25	273	-87	Cozumel	Otros	Landazuri.etal.2002	Paper	paper	0.008671	28.1985	0.10153	-0.0005556	502.41	13.4	-3.6	0.454545	15	20.6	-3196.73	521.192	1.6007	0.2593	6.64e-09	0.206
XE48	RadioPirata	RadioPirata	-86.865	20.8536	20.75	273	-87	Northern.QRoo	AGRRA.V5	Monitoreo.PNAPM	PNAPM	monitoring	0.02851	28.3671	0.10153	-0.0007154	687.99	1.3	1618.2	8.37557	9188	41	5999.62	1934.69	-2.971	0.961	0.00418	0.2111
XE49	SanClemente	SanClemente	-87.022	20.4084	20.5	273	-87	Cozumel	AGRRA.V5	Greenpeace.2016	Greenpeace	monitoring	0.02885	28.4093	0.002667	-0.0002377	528.45	8.6	4.4	1.19298	136	3.8	1473.42	574.793	0.735	0.2857	0.0204	0.2485
XE50	Tanchacte.Norte	Tanchacte.Norte	-86.8353	20.9106	21	273.25	-86.75	Northern.QRoo	Otros	PNAPM-CONANP.SF	PNAPM-CONANP	report	0.02466	28.2755	0.0009641	-0.0006563	1046.97	5.7	1618.2	8.37557	9188	11.9	-1148.82	701.024	0.5768	0.3484	0.106	0.04274
XE51	TanchacteSur	TanchacteSur	-86.8423	20.9022	21	273.25	-86.75	Northern.QRoo	AGRRA.V5	Monitoreo.PNAPM	PNAPM	monitoring	0.02466	28.2755	0.0009641	-0.0006563	583.56	2.7	1618.2	8.37557	9188	7.8	-2421.02	1043.96	1.207	0.5185	0.0262	0.115
XE52	Tormentos	Tormentos	-87.0126	20.4318	20.5	273	-87	Cozumel	AGRRA.V5	Greenpeace.2016	Greenpeace	monitoring	0.02885	28.4093	0.002667	-7.38e-05	632.82	9.7	1171.4	1.0819	77372	2.1	-1033.48	484.599	0.5157	0.2408	0.0435	0.1349
XE54	Yucab	Yucab	-87.0175	20.4206	20.5	273	-87	Cozumel	Otros	Landazuri.etal.2002	Paper	paper	0.02885	28.4093	0.002667	-0.0002377	575.43	13.4	1171.4	1.0819	77372	18	-1203.15	426.121	0.6046	0.212	0.005	0.04751

## Sheet: Hoja2
Site.ID	Name	Longitude	Latitude	Latitude.used	Longitude.used	Longitude.chl	Region	Protocol	Source	source.type	Temperature.rate	Temperature2016	Chl.rate	Chl.rate.spec	Distance.shore	Depth	Population.average	Population.rate	Population2010	intercept	intercept.se	slope	slope.se	p.value	Adjusted R2
XE01	PuertoMorelosRodriguez	-86.865	20.8521	20.75	273	-87	Northern.QRoo	Otros	Rodriguez-Martinezetal.2012	paper	0.02851	28.3671	0.10153	-0.0007154	706.3	4	1618.2	8.37557	9188	954.1	159.34	-0.47	0.07937	0.0274	0.9191
XE02	Bonanza	-86.8141	20.9642	21	273.25	-86.75	Northern.QRoo	Otros	PNAPM-CONANP.SF	report	0.02466	28.2755	0.0009641	0.0005066	1675.63	0.75	0	0	0	1029.72	454.629	-0.5082	0.226	0.0284	0.06534
XE03	CardonaMERASomero	-87.0195	20.4078	20.5	273	-87	Cozumel	SAM	MERA.PNAC	monitoring	0.02885	28.4093	0.002667	-0.0002377	325.37	5.2	4.4	1.19298	136	-683.236	1217.02	0.3468	0.6051	0.574	-0.04112
XE04	Chankanaab	-87.0023	20.44	20.5	273	-87	Cozumel	AGRRA.V5	CONACYT.247104	monitoring	0.02885	28.4093	0.002667	-7.38e-05	375.18	12	1171.4	1.0819	77372	-995.677	377.586	0.5039	0.1879	0.00811	0.03818
XE05	ChankanaabBolonesMERAProfundo	-87.0051	20.4401	20.5	273	-87	Cozumel	SAM	MERA.PNAC	monitoring	0.02885	28.4093	0.002667	-7.38e-05	528.22	18.48	1171.4	1.0819	77372	-217.165	1050.77	0.1117	0.5225	0.834	-0.06343
XE06	Colombia	-87.0272	20.3243	20.25	273	-87	Cozumel	AGRRA.V5	CONACYT.247104	monitoring	0.008671	28.1985	0.10153	-0.0007512	1467.88	12.3	-3.6	0.454545	15	-3375.73	532.479	1.692	0.265	2.5e-09	0.225
XE07	ColombiaMERASomero	-87.0244	20.3205	20.25	273	-87	Cozumel	SAM	MERA.PNAC	monitoring	0.008671	28.1985	0.10153	-0.0009566	1262.87	6.5	-3.6	0.454545	15	-3651.44	1790.56	1.8281	0.8902	0.0567	0.1591
XE08	Cuevones	-86.742	21.1617	21.25	273.25	-86.75	Northern.QRoo	AGRRA.V4	Perera-Valderrama.etal.2016	paper	0.03152	28.0733	0.0009472	-0.006369	1262.87	8.54191	20620	1.19169	640948	-4120.16	1432.69	2.05	0.7114	0.0181	0.4221
XE09	Dalila	-87.0291	20.3488	21.25	273.25	-86.75	Cozumel	AGRRA.V5	CONACYT.247104	monitoring	0.03152	28.0733	0.0009472	-0.0004525	766.91	12	-3.6	0.454545	15	-2418.57	546.624	1.214	0.272	1.6e-05	0.1133
XE10	DzulHaMERASomero	-86.9871	20.4588	20.5	273	-87	Cozumel	SAM	MERA.PNAC	monitoring	0.02885	28.4093	0.002667	8.147e-06	100.11	3	1264.2	1.08804	78118	-2418.57	546.624	1.214	0.272	1.6e-05	0.1133
XE11	HananII	-86.761	20.499	20.5	273.25	-86.75	Cozumel	AGRRA.V5	CONACYT.247104	monitoring	0.03113	28.4169	0.002236	0.0007292	732.26	8	0	0	0	128.706	455.536	-0.05734	0.22648	0.804	-0.07164
XE12	Islote	-87.0023	20.2703	20.25	273	-87	Cozumel	SAM	Monitoreo.PNAC	monitoring	0.008671	28.1985	0.10153	-0.0008478	1131.49	15	0	0	0	-765.556	2023.46	0.3869	1.0084	0.706	-0.05281
XE13	Jardines	-86.8802	20.8314	20.75	273	-87	Northern.QRoo	Otros	PNAPM-CONANP.SF	report	0.02851	28.3671	0.004263	-0.0004865	837.62	2.4	1619.8	8.38286	9196	2165.07	807.948	-1.069	0.4014	0.0108	0.01085
XE14	LaBocana	-86.8411	20.8864	20.75	275.25	-84.75	Northern.QRoo	Otros	CARICOMP.2004	monitoring	0.02636	28.4532	0.0004544	0.001497	1453.59	3.7	1618.2	8.37557	9188	-2439.85	1031.95	1.2204	0.5127	0.0219	0.0979
XE15	LaPared	-86.8762	20.8242	20.75	273	-87	Northern.QRoo	AGRRA.MODIFICADO	Msthesis.MOG	thesis	0.02851	28.3671	0.004263	-0.0004865	1652.04	4.3	1619.8	8.38286	9196	13	793.1	-0.0008021	0.394	0.998	-0.02564
XE16	Limones	-86.7972	20.9885	21	273.25	-86.75	Northern.QRoo	Otros	PNAPM-CONANP.SF	report	0.03015	28.2755	0.0009641	0.003471	2883.76	3	0	0	0	-5408.99	1459.81	2.6997	0.7253	0.000528	0.2112
XE17	Mah01	-87.7164	18.6626	18.75	272.25	-87.75	Southern.QRoo	AGRRA.V5	HRI	monitoring	0.02035	28.4447	0.003474	-0.0004339	1076.36	11.4	127.6	3.26241	920	-96.1212	1616.36	0.05303	0.80236	0.948	-0.04525
XE18	MahahualRodriguez	-87.703	18.711	18.75	272.25	-87.75	Southern.QRoo	Otros	Rodriguez-Martinez.etal.2012	paper	0.02035	28.4447	0.003474	-0.0008088	633.41	12.5	127.6	3.26241	920	4027.35	854.073	-2	0.4254	0.0424	0.8755
XE19	MX1008	-87.4606	20.057	20	272.5	-87.5	Central.QRoo	AGRRA.V4	HRI	monitoring	0.02628	28.3903	0.003491	0.002147	1689.87	18.2	-0.2	0.9	9	-939.969	1045.21	0.4798	0.5194	0.367	-0.007039
XE20	MX1017	-86.7298	21.1706	21.25	273.25	-86.75	Northern.QRoo	AGRRA.V4	HRI	monitoring	0.03152	28.0733	0.0009472	0.006697	3874.1	11.07	20620	1.19169	640948	-557.737	577.2	0.2828	0.287	0.333	-0.00107
XE21	MX1020	-87.7177	18.6497	18.75	272.25	-87.75	Southern.QRoo	AGRRA.V4	HRI	monitoring	0.02688	28.4447	0.003474	-0.000127	925.11	12.4	127.6	3.26241	920	-3095.98	847.631	1.545	0.4209	0.0011	0.316
XE22	MX1042	-87.4579	20.1153	20	272.5	-87.5	Central.QRoo	AGRRA.V4	HRI	monitoring	0.02628	28.3903	0.003491	0.001574	958.37	9.5	688.6	1.23279	18233	210.141	1370.54	-0.09861	0.68106	0.886	-0.0489
XE23	MX1043	-87.3854	20.2586	20.25	272.5	-87.5	Northern.QRoo	AGRRA.V4	HRI	monitoring	0.02641	28.3968	0.0008166	0.000774	950.65	9.1	707.4	1.23799	18399	-1038.38	1217.8	0.5232	0.6054	0.395	-0.009471
XE24	MX1048	-87.0282	20.3584	20.3584	20.5	273	Cozumel	AGRRA.V4	HRI	monitoring	0.02885	28.4093	0.002667	0.000774	351.67	11.69	-3.6	0.454545	15	-1020.01	830.83	0.5128	0.413	0.226	0.02122
XE25	MX1050	-87.1645	20.5363	20.5	272.75	-87.25	Northern.QRoo	AGRRA.V4	HRI	monitoring	0.02793	28.4091	0.0001051	0.0009921	244.87	12.4	715	2.18377	6595	-1782.62	591.419	0.8909	0.2939	0.00687	0.2905
XE26	MX1053	-86.9707	20.4862	20.5	273	-87	Cozumel	AGRRA.V4	HRI	monitoring	0.02885	28.4093	0.002667	-0.0005671	91.06	6.3	1175	1.08219	77357	1077.37	608.147	-0.5325	0.3023	0.09	0.07222
XE27	MX1055	-87.1061	20.5842	20.5	273	-87	Northern.QRoo	AGRRA.V4	HRI	monitoring	0.02885	28.4093	0.002667	0.0002319	91.06	7.3	9910	1.49357	149941	-736.724	433.701	0.3687	0.2156	0.102	0.08047
XE28	MX1057	-87.0535	20.6406	20.75	273	-87	Northern.QRoo	AGRRA.V4	HRI	monitoring	0.02851	28.3671	0.004263	0.0002601	319.79	2.4	9920	1.49384	150038	-922.176	851.745	0.4619	0.4233	0.288	0.009005
XE29	MX1065	-87.7907	18.3531	18.25	272.25	-87.75	Southern.QRoo	AGRRA.V4	HRI	monitoring	0.02035	28.2088	-0.07072	0.0001125	1085.01	13.7	24.6	1.4881	375	-696.761	854.347	0.352	0.4245	0.413	-0.009853
XE30	MX1116	-87.1492	20.551	20.5	272.75	-87.25	Northern.QRoo	AGRRA.V4	HRI	monitoring	0.02793	28.3968	0.0001051	0.0002827	260.77	3.1	800.6	3.00451	6000	900.086	738.914	-0.4452	0.3672	0.241	0.02413
XE31	MX1117	-87.4191	20.218	20.25	272.5	-87.5	Northern.QRoo	AGRRA.V4	HRI	monitoring	0.02641	28.3968	0.0008166	0.0012702	827.21	3.2	696	1.23415	18342	-251.412	1320.11	0.1312	0.6562	0.843	-0.03993
XE32	MX1131	-86.8288	20.9163	21	273.25	-86.75	Northern.QRoo	AGRRA.V4	HRI	monitoring	0.02466	28.2755	0.0009641	-0.0006563	827.21	4.8	1618.2	8.37557	9188	-3428.86	1834.61	1.7167	0.9114	0.0822	0.154
XE33	MX1132	-86.7964	20.9873	21	273.25	-86.75	Northern.QRoo	AGRRA.V4	HRI	monitoring	0.02466	28.2755	0.0009641	0.003471	3001.39	1.9	0	0	0	-3970.21	2307.23	1.987	1.147	0.0951	0.06898
XE34	MX1133	-86.7405	21.1334	21.25	273.25	-86.75	Northern.QRoo	AGRRA.V4	HRI	monitoring	0.03152	28.0733	0.0009472	0.007517	67.31	3	20620	1.19169	640948	-135.34	255.1	0.06825	0.12682	0.595	-0.02809
XE35	MX1136	-87.7984	18.3497	18.25	272.25	-87.75	Southern.QRoo	AGRRA.V4	HRI	monitoring	0.02035	28.2088	-0.07072	0.0001125	530.94	1.9	24.6	1.4881	375	106.204	531.556	-0.04971	-0.04971	0.26423	0.853
XE36	MX2067	-87.767	18.4002	18.5	272.25	-87.75	Southern.QRoo	AGRRA.V4	HRI	monitoring	0.02272	28.4262	-0.04802	0.0008499	391.17	10.8	0	0	0	-1545.53	1037.14	0.7758	0.5155	0.144	0.04474
XE37	MX3009	-86.9999	20.2723	20.25	273	-87	Cozumel	AGRRA.V4	HRI	monitoring	0.008671	28.1985	0.10153	-0.0008478	668.41	7.2	0	0	0	-1406.47	676.438	0.7051	0.3362	0.0472	0.124
XE38	MX3054	-86.7526	20.5112	20.5	273.25	-86.75	Cozumel	AGRRA.V4	HRI	monitoring	0.03113	28.4169	0.002236	0.0007292	33499	10.6	0	0	0	-725.332	893.874	0.3679	0.4442	0.425	-0.02686
XE39	MXXCK01	-87.8274	18.2137	18.25	272.25	-87.75	Southern.QRoo	AGRRA.V5	HRI	monitoring	0.02035	28.2088	-0.07072	0.004917	1571.22	10.3	24.6	1.4881	375	-2834.61	2008.9	1.4167	0.9975	0.175	0.05645
XE40	MXXCK02	-87.8262	18.2401	18.25	272.25	-87.75	Southern.QRoo	AGRRA.V5	HRI	monitoring	0.02035	28.2088	-0.07072	-8.004e-05	1559.4	7.7	24.6	1.4881	375	689.611	2477.62	-0.3333	1.2302	0.79	-0.05765
XE41	PalancarJardinesMERASomero	-87.0262	20.3318	20.25	273	-87	Cozumel	SAM	MERA.PNAC	monitoring	0.008671	28.1985	0.10153	-0.0009566	919.24	5.6	-3.6	0.454545	15	-4597.68	2243.46	2.295	1.115	0.0563	0.1599
XE42	Paraiso	-86.983	20.4693	20.5	273	-87	Cozumel	AGRRA.V5	CONACYT.247104	monitoring	0.02885	28.4093	0.002667	9.009e-05	176.64	9.6	1267.8	1.08833	78103	-423.902	454.308	0.2183	0.2261	0.336	-0.0004526
XE43	ParaisoMERASomero	-86.9815	20.4694	20.5	273	-87	Cozumel	SAM	MERA.PNAC	monitoring	0.02885	28.4093	0.002667	9.009e-05	21.76	4	1267.8	1.08833	78103	931.55	736.505	-0.4605	0.3662	0.227	0.03309
XE44	PasodelCedral	-87.0289	20.3739	20.25	273	-87	Cozumel	Otros	Landazuri.etal.2002	paper	0.008671	28.1985	0.10153	-0.0005556	502.41	13.4	-3.6	0.454545	15	-2219.02	522.295	1.1147	0.2599	3.21e-05	0.1039
XE45	PNAC	-87.0247	20.2936	20.25	273	-87	Cozumel	Otros	Barranco.etal.2016	paper	0.008671	28.1985	0.10153	-0.001057	1029.57		-3.6	0.454545	15	-149.315	82.9785	0.07464	0.0413	0.0725	0.01286
XE46	PNCOIMPCPN	-86.7583	21.1806	21.25	273.25	-86.75	Northern.QRoo	Otros	Barranco.etal.2016	paper	0.03152	28.0733	0.0009472	-0.006369	4937.69		20612.8	1.19158	641029	30.6741	84.4972	-0.015	0.04205	0.722	-0.009905
XE47	PuntaAllenRodriguez	-87.47	19.8	19.75	272.5	-87.5	Central.QRoo	Otros	Rodriguez-Martinezetal.,2012	paper	0.02705	28.3698	0.006596	0.005599	494.24	12.5	38.4	1.69314	469	1315.5	173.84	-0.65	0.0866	0.0843	0.9651
XE48	RadioPirata	-86.865	20.8536	20.75	273	-87	Northern.QRoo	AGRRA.V5	Monitoreo.PNAPM	monitoring	0.02851	28.3671	0.10153	-0.0007154	687.99	1.3	1618.2	8.37557	9188	5999.62	1934.69	-2.971	0.961	0.00418	0.2111
XE49	SanClemente	-87.022	20.4084	20.5	273	-87	Cozumel	AGRRA.V5	Greenpeace.2016	monitoring	0.02885	28.4093	0.002667	-0.0002377	528.45	8.6	4.4	1.19298	136	1473.42	574.793	0.735	0.2857	0.0204	0.2485
XE50	Tanchacte.Norte	-86.8353	20.9106	21	273.25	-86.75	Northern.QRoo	Otros	PNAPM-CONANP.SF	report	0.02466	28.2755	0.0009641	-0.0006563	1046.97	5.7	1618.2	8.37557	9188	-1148.82	701.024	0.5768	0.3484	0.106	0.04274
XE51	TanchacteSur	-86.8423	20.9022	21	273.25	-86.75	Northern.QRoo	AGRRA.V5	Monitoreo.PNAPM	monitoring	0.02466	28.2755	0.0009641	-0.0006563	583.56	2.7	1618.2	8.37557	9188	-2421.02	1043.96	1.207	0.5185	0.0262	0.115
XE52	Tormentos	-87.0126	20.4318	20.5	273	-87	Cozumel	AGRRA.V5	Greenpeace.2016	monitoring	0.02885	28.4093	0.002667	-7.38e-05	632.82	9.7	1171.4	1.0819	77372	-1033.48	484.599	0.5157	0.2408	0.0435	0.1349
XE53	Yalku.Rodriguez	-87.25	20.5	20.5	272.75	-87.25	Central.QRoo	Otros	Rodriguez-Martinez.etal.2012	paper	0.02793	28.4091	0.0001051	0.0003944	1240.98	12.5	798	3.00603	5979
XE54	Yucab	-87.0175	20.4206	20.5	273	-87	Cozumel	Otros	Landazuri.etal.2002	paper	0.02885	28.4093	0.002667	-0.0002377	575.43	13.4	1171.4	1.0819	77372	-331.447	446.572	0.1713	0.2222	0.442	-0.002713
