# Supplementary material
Source: MDPI journal article supplement (https://www.mdpi.com/1424-2818/12/9/338)
Supplement: s1 [file s1 › Supplementary material/S9_ac_meta-analysis_input.xlsx]

## Sheet: Hoja1
Site.ID	Name	Longitude	Latitude	Region	Protocol	Source	Monitoring.entity	Temperature.rate	Temperature2016	Chl.rate.spec	Distance.shore	Depth	Population.average	Population.rate	Population2010	Initial.cover	intercept	slope	slope.se	p.value
XE02	Bonanza	-86.8141	20.9642	Northern.QRoo	Otros	PNAPM-CONANP.SF	PNAPM - CONANP	0.02466	28.2755	0.0005066	1675.63	0.75	0	0	0	23	3074.39	-1.5141	0.5326	0.0062
XE03	CardonaMERASomero	-87.0195	20.4078	Cozumel	SAM	MERA.PNAC	PNAC	0.02885	28.4093	-0.0002377	325.37	5.2	4.4	1.19298	136	25.3	-5077.56	2.539	1.196	0.0497
XE04	Chankanaab	-87.0023	20.44	Cozumel	AGRRA.V5	CONACYT.247104	CONACYT	0.02885	28.4093	-7.38e-05	375.18	12	1171.4	1.0819	77372	18.3	-2114.2	1.0607	0.2556	0.000362
XE05	ChankanaabBolonesMERAProfundo	-87.0051	20.4401	Cozumel	SAM	MERA.PNAC	PNAC	0.02885	28.4093	-7.38e-05	528.22	18.48	1171.4	1.0819	77372	13.3	-15699.1	7.82	1.782	0.000528
XE06	Colombia	-87.0272	20.3243	Cozumel	AGRRA.V5	CONACYT.247104	CONACYT	0.008671	28.1985	-0.0007512	1467.88	12.3	-3.6	0.454545	15	16.3	923.269	-0.4536	0.1626	0.00609
XE07	ColombiaMERASomero	-87.0244	20.3205	Cozumel	SAM	MERA.PNAC	PNAC	0.008671	28.1985	-0.0009566	1262.87	6.5	-3.6	0.454545	15	27.3	-1202.97	0.614	1.218	0.621
XE08	Cuevones	-86.742	21.1617	Northern.QRoo	AGRRA.V4	Perera-Valderrama.etal.2016	Paper	0.03152	28.0733	-0.006369	1262.87	8.54191	20620	1.19169	640948	19.3	-2412.91	1.217	2.563	0.644
XE09	Dalila	-87.0291	20.3488	Cozumel	AGRRA.V5	CONACYT.247104	CONACYT	0.03152	28.0733	-0.0004525	766.91	12	-3.6	0.454545	15	14.1	-974.044	0.4922	0.236	0.0388
XE10	DzulHaMERASomero	-86.9871	20.4588	Cozumel	SAM	MERA.PNAC	PNAC	0.02885	28.4093	8.147e-06	100.11	3	1264.2	1.08804	78118	28.8	-17704.2	8.82	2.117	0.000729
XE11	HananII	-86.761	20.499	Cozumel	AGRRA.V5	CONACYT.247104	CONACYT	0.03113	28.4169	0.0007292	732.26	8	0	0	0	50.8	3074.39	-1.5141	0.5326	0.0062
XE12	Islote	-87.0023	20.2703	Cozumel	SAM	Monitoreo.PNAC	PNAC - Monitoring	0.008671	28.1985	-0.0008478	1131.49	15	0	0	0	4	-9184.5	4.583	0.589	7.93e-07
XE13	Jardines	-86.8802	20.8314	Northern.QRoo	Otros	PNAPM-CONANP.SF	PNAPM	0.02851	28.3671	-0.0004865	837.62	2.4	1619.8	8.38286	9196	25	-2533.39	1.275	0.7318	0.0885
XE14	LaBocana	-86.8411	20.8864	Northern.QRoo	Otros	CARICOMP.2004	CARICOMP	0.02636	28.4532	0.001497	1453.59	3.7	1618.2	8.37557	9188	20	-1716.7	0.867	0.9366	0.36
XE15	LaPared	-86.8762	20.8242	Northern.QRoo	AGRRA.MODIFICADO	Msthesis.MOG	Paper	0.02851	28.3671	-0.0004865	1652.04	4.3	1619.8	8.38286	9196	12.6	-1696.54	0.8535	0.5324	0.117
XE16	Limones	-86.7972	20.9885	Northern.QRoo	Otros	PNAPM-CONANP.SF	PNAPM - CONANP	0.03015	28.2755	0.003471	2883.76	3	0	0	0	9	1752.86	-0.862	0.4582	0.0659
XE17	Mah01	-87.7164	18.6626	Southern.QRoo	AGRRA.V5	HRI	HRI	0.02035	28.4447	-0.0004339	1076.36	11.4	127.6	3.26241	920	38.7	2861.39	-1.402	1.49	0.357
XE18	MX1008	-87.4606	20.057	Central.QRoo	AGRRA.V4	HRI	HRI	0.02628	28.3903	0.002147	1689.87	18.2	-0.2	0.9	9	11.8	-5488.47	2.7454	0.8064	0.00281
XE19	MX1017	-86.7298	21.1706	Northern.QRoo	AGRRA.V4	HRI	HRI	0.03152	28.0733	0.006697	3874.1	11.07	20620	1.19169	640948	46.5	903.119	-0.4299	0.7601	0.577
XE20	MX1020	-87.7177	18.6497	Southern.QRoo	AGRRA.V4	HRI	HRI	0.02688	28.4447	-0.000127	925.11	12.4	127.6	3.26241	920	7.3	-4902.57	2.451	0.883	0.0101
XE21	MX1042	-87.4579	20.1153	Central.QRoo	AGRRA.V4	HRI	HRI	0.02628	28.3903	0.001574	958.37	9.5	688.6	1.23279	18233	5.5	-3870.51	1.9355	0.7154	0.0136
XE22	MX1043	-87.3854	20.2586	Northern.QRoo	AGRRA.V4	HRI	HRI	0.02641	28.3968	0.000774	950.65	9.1	707.4	1.23799	18399	10	-1722.42	0.8657	0.5704	0.141
XE23	MX1048	-87.0282	20.3584	Cozumel	AGRRA.V4	HRI	HRI	0.02885	28.4093	0.000774	351.67	11.69	-3.6	0.454545	15	2.5	-5612.48	2.7982	0.6511	0.000248
XE24	MX1050	-87.1645	20.5363	Northern.QRoo	AGRRA.V4	HRI	HRI	0.02793	28.4091	0.0009921	244.87	12.4	715	2.18377	6595	6	-845.856	0.4273	0.5289	0.429
XE25	MX1053	-86.9707	20.4862	Cozumel	AGRRA.V4	HRI	HRI	0.02885	28.4093	-0.0005671	91.06	6.3	1175	1.08219	77357	3.3	-1693.4	0.8454	0.6128	0.179
XE26	MX1055	-87.1061	20.5842	Northern.QRoo	AGRRA.V4	HRI	HRI	0.02885	28.4093	0.0002319	91.06	7.3	9910	1.49357	149941	3.2	-1485.9	0.7429	0.251	0.00749
XE27	MX1057	-87.0535	20.6406	Northern.QRoo	AGRRA.V4	HRI	HRI	0.02851	28.3671	0.0002601	319.79	2.4	9920	1.49384	150038	5	-739.286	0.3734	0.5684	0.519
XE28	MX1065	-87.7907	18.3531	Southern.QRoo	AGRRA.V4	HRI	HRI	0.02035	28.2088	0.0001125	1085.01	13.7	24.6	1.4881	375	19	-2752.89	1.3814	0.5226	0.0128
XE29	MX1116	-87.1492	20.551	Northern.QRoo	AGRRA.V4	HRI	HRI	0.02793	28.3968	0.0002827	260.77	3.1	800.6	3.00451	6000	11.8	-716.144	0.3633	0.5311	0.503
XE30	MX1117	-87.4191	20.218	Northern.QRoo	AGRRA.V4	HRI	HRI	0.02641	28.3968	0.0012702	827.21	3.2	696	1.23415	18342	7.7	208.901	-0.09864	0.36627	0.79
XE31	MX1131	-86.8288	20.9163	Northern.QRoo	AGRRA.V4	HRI	HRI	0.02466	28.2755	-0.0006563	827.21	4.8	1618.2	8.37557	9188	22	-1755.01	0.8849	0.8287	0.305
XE32	MX1132	-86.7964	20.9873	Northern.QRoo	AGRRA.V4	HRI	HRI	0.02466	28.2755	0.003471	3001.39	1.9	0	0	0	27.5	2351.06	-1.1577	0.7171	0.119
XE33	MX1133	-86.7405	21.1334	Northern.QRoo	AGRRA.V4	HRI	HRI	0.03152	28.0733	0.007517	67.31	3	20620	1.19169	640948	6.3	-4720.57	2.361	0.7615	0.00474
XE34	MX1136	-87.7984	18.3497	Southern.QRoo	AGRRA.V4	HRI	HRI	0.02035	28.2088	0.0001125	530.94	1.9	24.6	1.4881	375	4.8	-6780.51	3.3836	0.3902	3.28e-08
XE35	MX2067	-87.767	18.4002	Southern.QRoo	AGRRA.V4	HRI	HRI	0.02272	28.4262	0.0008499	391.17	10.8	0	0	0	18	-3571.59	1.788	0.713	0.0187
XE36	MX3009	-86.9999	20.2723	Cozumel	AGRRA.V4	HRI	HRI	0.008671	28.1985	-0.0008478	668.41	7.2	0	0	0	5	-6925.99	3.4631	0.5972	6.58e-06
XE37	MX3054	-86.7526	20.5112	Cozumel	AGRRA.V4	HRI	HRI	0.03113	28.4169	0.0007292	33499	10.6	0	0	0	24.8	-2763.57	1.3901	0.8682	0.138
XE38	MXXCK01	-87.8274	18.2137	Southern.QRoo	AGRRA.V5	HRI	HRI	0.02035	28.2088	0.004917	1571.22	10.3	24.6	1.4881	375	27.5	-9277.58	4.625	1.614	0.0112
XE39	MXXCK02	-87.8262	18.2401	Southern.QRoo	AGRRA.V5	HRI	HRI	0.02035	28.2088	-8.004e-05	1559.4	7.7	24.6	1.4881	375	12.2	-10715.7	5.333	1.463	0.00218
XE40	PalancarJardinesMERASomero	-87.0262	20.3318	Cozumel	SAM	MERA.PNAC	PNAC	0.008671	28.1985	-0.0009566	919.24	5.6	-3.6	0.454545	15	17.7	-1887.5	0.9496	0.9278	0.321
XE41	Paraiso	-86.983	20.4693	Cozumel	AGRRA.V5	CONACYT.247104	CONACYT	0.02885	28.4093	9.009e-05	176.64	9.6	1267.8	1.08833	78103	10.8	140.832	-0.0674	0.1328	0.612
XE42	ParaisoMERASomero	-86.9815	20.4694	Cozumel	SAM	MERA.PNAC	PNAC	0.02885	28.4093	9.009e-05	21.76	4	1267.8	1.08833	78103	31	-23594	11.75	3.052	0.00142
XE43	PasodelCedral	-87.0289	20.3739	Cozumel	Otros	Landazuri.etal.2002	Paper	0.008671	28.1985	-0.0005556	502.41	13.4	-3.6	0.454545	15	11.6	-1978.18	0.9908	0.2149	8.89e-06
XE46	RadioPirata	-86.865	20.8536	Northern.QRoo	AGRRA.V5	Monitoreo.PNAPM	PNAPM	0.02851	28.3671	-0.0007154	687.99	1.3	1618.2	8.37557	9188	9.2	-766.708	0.3874	0.5652	0.498
XE47	SanClemente	-87.022	20.4084	Cozumel	AGRRA.V5	Greenpeace.2016	Greenpeace	0.02885	28.4093	-0.0002377	528.45	8.6	4.4	1.19298	136	4.5	-532.581	0.2692	0.5684	0.642
XE48	Tanchacte.Norte	-86.8353	20.9106	Northern.QRoo	Otros	PNAPM-CONANP.SF	PNAPM - CONANP	0.02466	28.2755	-0.0006563	1046.97	5.7	1618.2	8.37557	9188	46	925.019	-0.441	0.687	0.525
XE49	TanchacteSur	-86.8423	20.9022	Northern.QRoo	AGRRA.V5	Monitoreo.PNAPM	PNAPM	0.02466	28.2755	-0.0006563	583.56	2.7	1618.2	8.37557	9188	24.3	2195.17	-1.0806	0.8345	0.204
XE50	Tormentos	-87.0126	20.4318	Cozumel	AGRRA.V5	Greenpeace.2016	Greenpeace	0.02885	28.4093	-7.38e-05	632.82	9.7	1171.4	1.0819	77372	1.7	-3318.36	1.658	1.16	0.167
XE51	Yucab	-87.0175	20.4206	Cozumel	Otros	Landazuri.etal.2002	Paper	0.02885	28.4093	-0.0002377	575.43	13.4	1171.4	1.0819	77372	7.9	-2046.04	1.023	0.17	1.45e-08
