# Supplementary material
Source: MDPI journal article supplement (https://www.mdpi.com/1424-2818/12/9/338)

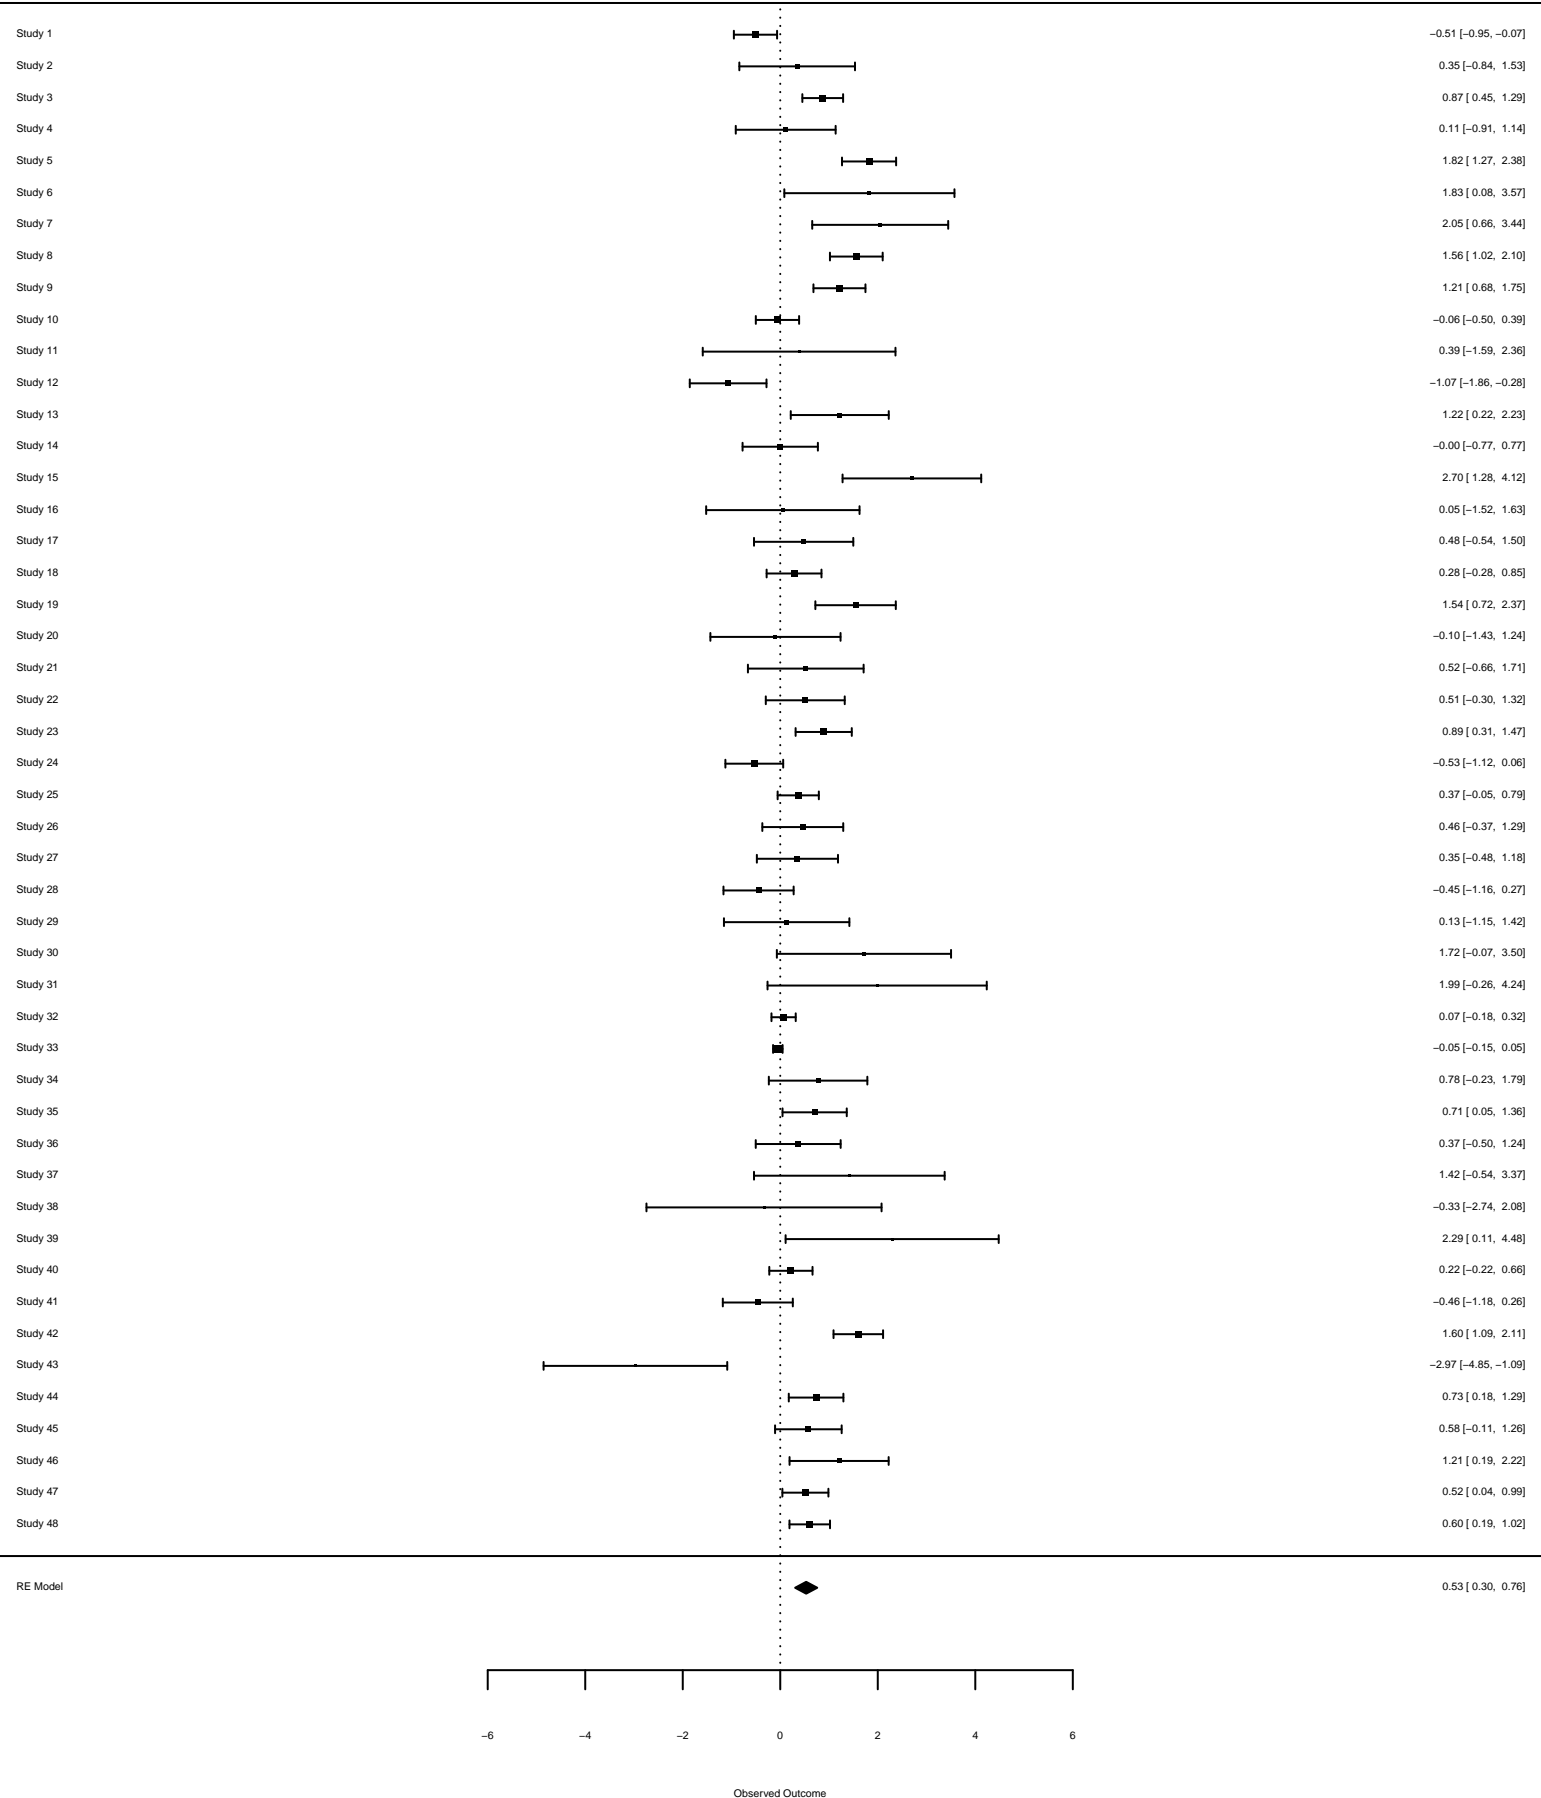

Supplement: s1 [file s1 › Supplementary material/S10_CC_forest_plot.pdf]

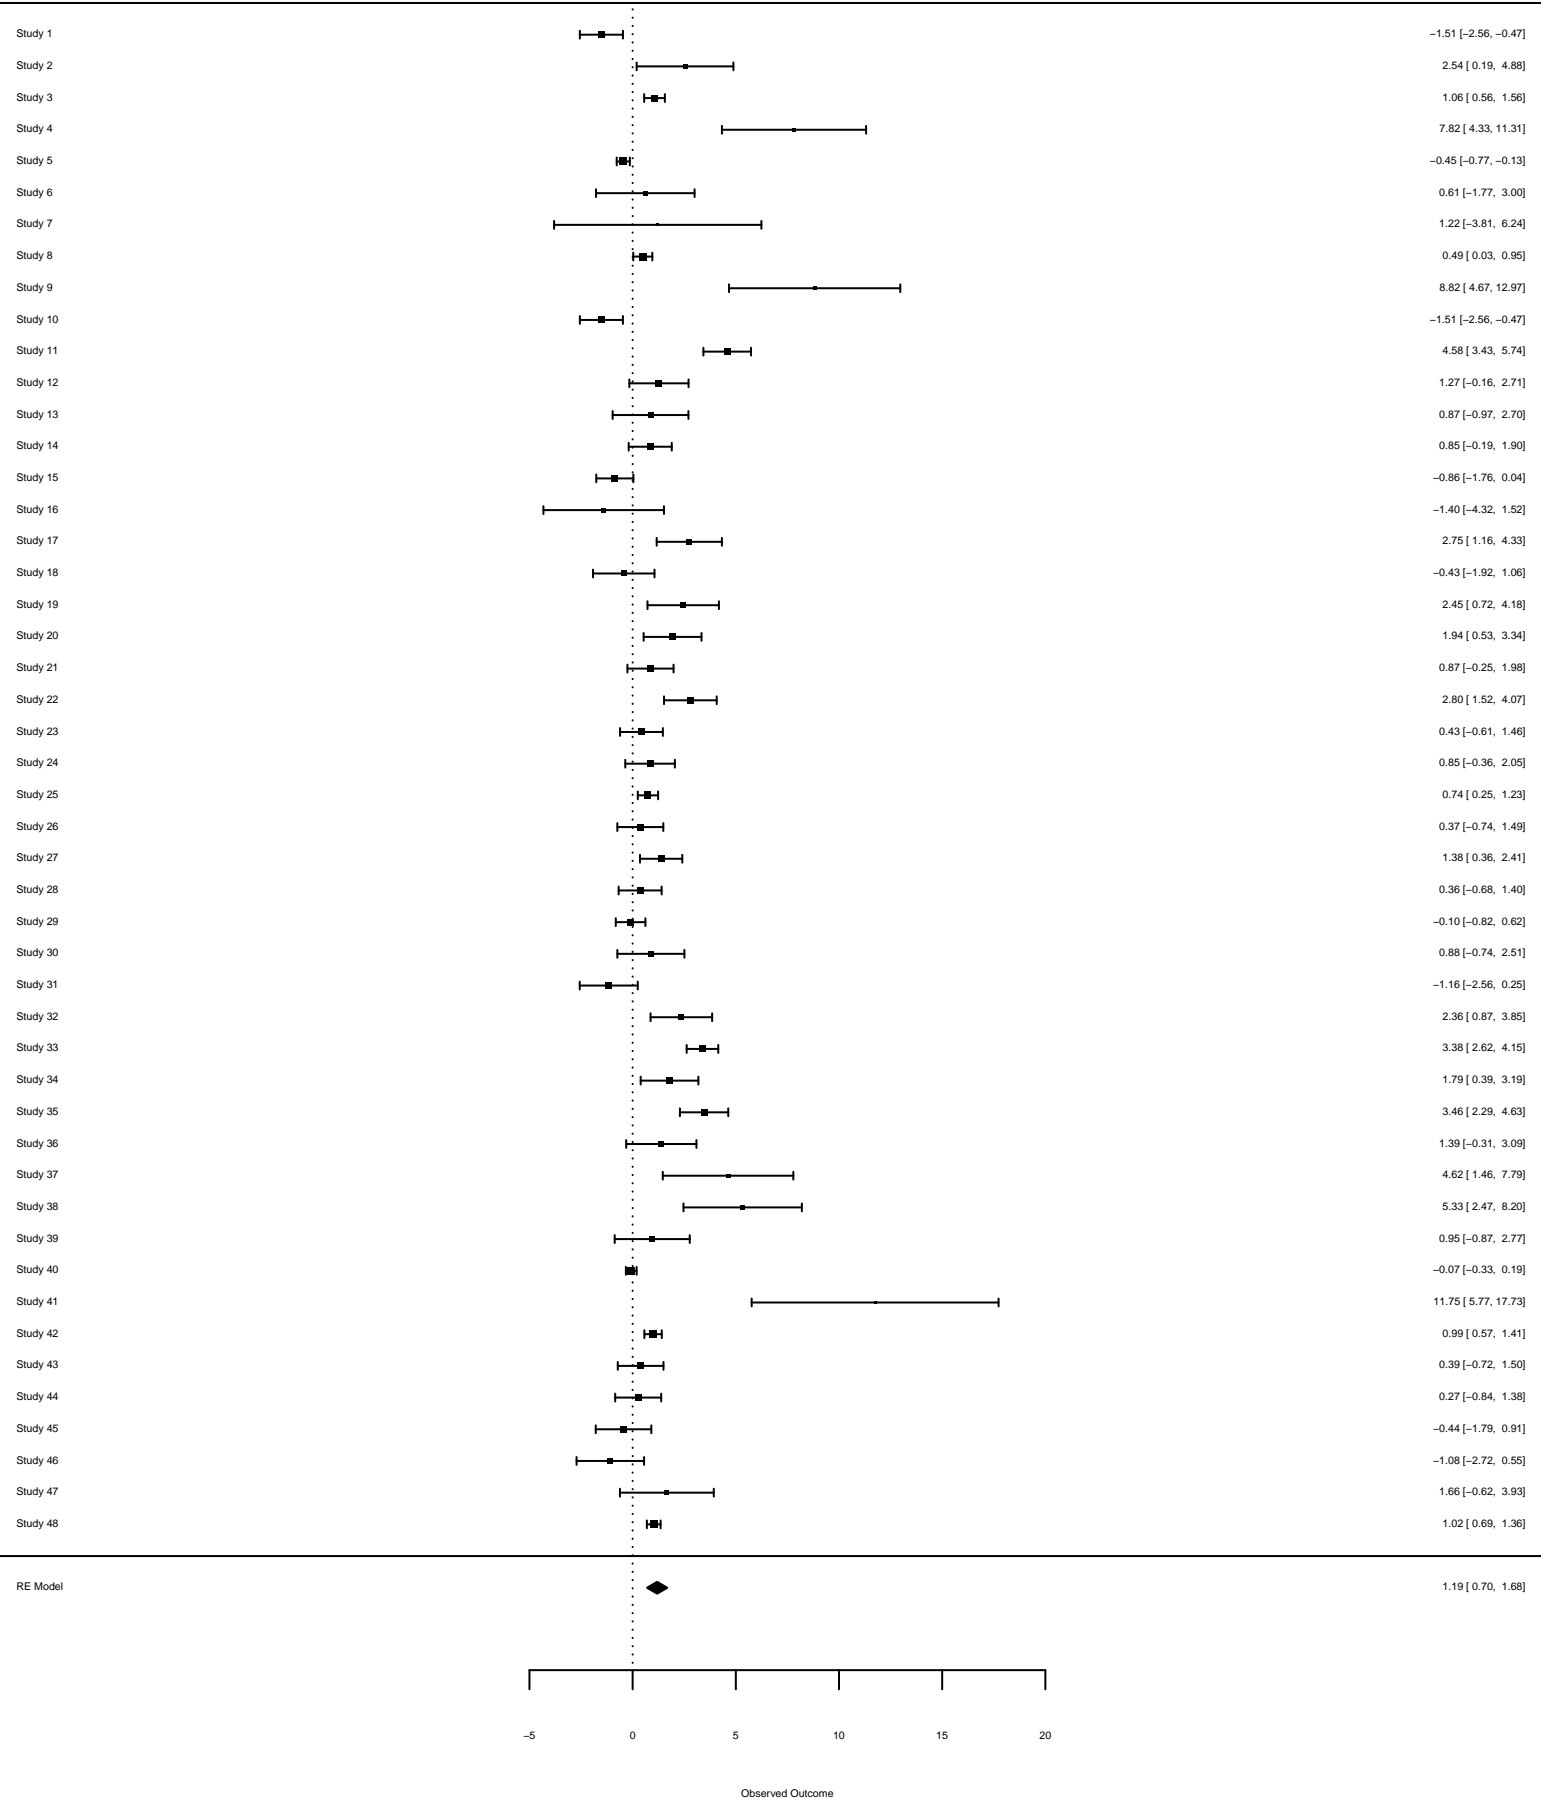

Supplement: s1 [file s1 › Supplementary material/S11_AC_Forest.pdf]
